# Supplementary material for: Axon TRAP reveals learning-associated alterations in cortical axonal mRNAs in the lateral amygdala
Source: eLife. 2019 Dec 11;8:e51607. doi: 10.7554/eLife.51607 (PMC6924958; doi:10.7554/eLife.51607)
Supplement: Supplementary file 2. [file elife-51607-supp2.xlsx]

## Sheet: Supplementary file 2
Results of Differential Gene Expression Analysis				Control axons TRAP versus trained axons TRAP					Control cortex TRAP versus control axons TRAP					Trained cortex TRAP versus trained axons TRAP					Control cortex TRAP versus trained cortex TRAP					Control cortex, TRAP versus tissue transcriptome					Control axons, TRAP versus tissue transcriptome					Trained cortex, TRAP versus tissue transcriptome					Trained axons, TRAP versus tissue transcriptome					Control axons tissue transcriptome versus trained axons tissue transcriptome					Control axons tissue transcriptome versus control cortex tissue transcriptome
Gene symbol	ensembl_gene_id	description	mean counts	log2FoldChange	lfcSE	stat	pvalue	padj	log2FoldChange	lfcSE	stat	pvalue	padj	log2FoldChange	lfcSE	stat	pvalue	padj	log2FoldChange	lfcSE	stat	pvalue	padj	log2FoldChange	lfcSE	stat	pvalue	padj	log2FoldChange	lfcSE	stat	pvalue	padj	log2FoldChange	lfcSE	stat	pvalue	padj	log2FoldChange	lfcSE	stat	pvalue	padj	log2FoldChange	lfcSE	stat	pvalue	padj	log2FoldChange
A2m	ENSRNOG00000045772	alpha-2-macroglobulin [Source:RGD Symbol;Acc:2004]	0.142	-0.236087	0.139957	-1.68686	0.0916304	NA	0	0.138671	0	1	NA	-0.237274	0.140746	-1.68584	0.0918275	NA	0	0.13946	0	1	NA	0	0.142839	0	1	NA	0	0.142403	0	1	NA	0	0.141682	0	1	NA	0.24139	0.145435	1.65978	0.0969589	NA	0	0.163848	0	1	1	0
A3galt2	ENSRNOG00000005935	alpha 1,3-galactosyltransferase 2 [Source:RGD Symbol;Acc:727913]	68.8026	0.308466	0.465888	0.662104	0.507905	0.744516	-1.43056	0.465183	-3.07526	0.00210319	0.0103262	-1.07401	0.465121	-2.3091	0.020938	0.0873157	-0.0480833	0.464416	-0.103535	0.917538	0.982139	-0.365641	0.464947	-0.786413	0.431626	0.606418	0.905405	0.465871	1.94347	0.0519595	0.141284	-0.267016	0.464876	-0.574382	0.56571	0.722675	0.0409294	0.466017	0.087828	0.930013	0.965042	-0.536541	0.460852	-1.16424	0.244328	1	0.15187
AA926063	ENSRNOG00000000478	AA926063gene [Source:RGD Symbol;Acc:1303072]	24.8161	-0.901337	0.473664	-1.9029	0.0570533	NA	1.24054	0.474139	2.6164	0.00888636	0.0349367	0.0287408	0.475498	0.0604435	0.951802	0.991006	0.310458	0.475971	0.652261	0.514232	0.753321	0.686328	0.476034	1.44176	0.149369	0.287668	-0.446491	0.473796	-0.942369	0.346004	NA	0.38056	0.475505	0.800328	0.423521	0.603902	0.447138	0.475658	0.940041	0.347197	0.549115	-0.00744508	0.471968	-0.0157746	0.987414	1	-0.104151
Aaas	ENSRNOG00000013445	achalasia, adrenocortical insufficiency, alacrimia [Source:RGD Symbol;Acc:1308701]	798.977	0.442556	0.313078	1.41356	0.15749	0.384331	-0.176688	0.312537	-0.565335	0.571846	0.748701	0.465136	0.3129	1.48653	0.137138	0.327947	-0.199268	0.312358	-0.637948	0.523508	0.76069	-0.79278	0.311482	-2.54518	0.010922	0.0347463	-0.474713	0.311454	-1.52418	0.127463	0.279641	-0.49336	0.311383	-1.58442	0.113099	0.233499	-0.978542	0.311965	-3.13671	0.00170856	0.00816682	-0.0611072	0.313454	-0.194948	0.845434	1	-0.140998
Aacs	ENSRNOG00000000967	acetoacetyl-CoA synthetase [Source:RGD Symbol;Acc:708522]	1813.61	0.847419	0.260024	3.259	0.00111806	0.00888164	-0.0652253	0.259174	-0.251666	0.801299	0.897641	0.957836	0.259866	3.68588	0.000227916	0.00231022	-0.175643	0.259016	-0.678115	0.497699	0.740305	-0.547159	0.258627	-2.11563	0.0343759	0.0905712	-0.131943	0.258785	-0.509854	0.610154	0.775276	-0.331709	0.25858	-1.28281	0.199559	0.357913	-0.96448	0.259547	-3.71602	0.000202389	0.00123955	0.0148663	0.259814	0.0572191	0.954371	1	-0.349634
Aadat	ENSRNOG00000011861	aminoadipate aminotransferase [Source:RGD Symbol;Acc:2948]	340.331	-0.916991	0.456938	-2.00682	0.044769	0.160109	1.61171	0.456523	3.5304	0.000414929	0.00255524	-0.188209	0.456099	-0.412649	0.679864	0.845131	0.882927	0.455682	1.93759	0.0526727	0.18213	0.258961	0.455128	0.568985	0.569366	0.724514	-0.373706	0.456926	-0.81787	0.413431	0.624186	-0.532289	0.455714	-1.16803	0.242793	0.412221	-0.0640691	0.455616	-0.140621	0.88817	0.943734	-0.604199	0.457011	-1.32207	0.186145	1	-0.974286
Aaed1	ENSRNOG00000018886	AhpC/TSA antioxidant enzyme domain containing 1 [Source:RGD Symbol;Acc:1589650]	209.087	-0.129395	0.478307	-0.270526	0.786755	0.904938	-1.18181	0.479369	-2.46535	0.013688	0.0497774	-0.725495	0.478655	-1.5157	0.129596	0.316045	-0.585711	0.479714	-1.22096	0.222102	0.465965	-1.07829	0.47913	-2.25051	0.0244164	0.0682826	-0.221681	0.47801	-0.463758	0.642821	0.797814	-0.489252	0.478589	-1.02228	0.306649	0.484935	-0.0170715	0.477891	-0.0357225	0.971504	0.985284	0.0747238	0.479146	0.155952	0.876071	1	0.322957
Aagab	ENSRNOG00000008424	alpha- and gamma-adaptin binding protein [Source:RGD Symbol;Acc:621601]	1888.14	0.238975	0.246524	0.969382	0.332355	0.591628	-0.105541	0.246274	-0.428552	0.668249	0.815538	0.387379	0.246261	1.57305	0.115708	0.293864	-0.253945	0.246011	-1.03225	0.301954	0.55969	-1.33591	0.245172	-5.44884	5.06983e-08	4.64678e-07	-0.615418	0.245399	-2.50783	0.0121476	0.0432557	-1.19443	0.244927	-4.87665	1.07901e-06	8.18964e-06	-0.770798	0.245616	-3.13823	0.00169974	0.0081279	0.0835068	0.246186	0.339202	0.734457	1	-0.614314
Aak1	ENSRNOG00000018317	AP2 associated kinase 1 [Source:RGD Symbol;Acc:1305520]	8268.99	-0.0102143	0.0895786	-0.114026	0.909217	0.960947	0.538989	0.0893094	6.03508	1.58881e-09	2.54068e-08	0.454365	0.0893125	5.08736	3.63088e-07	8.00641e-06	0.0744106	0.0890425	0.835675	0.403338	0.66139	0.820675	0.0891737	9.2031	3.47759e-20	7.90076e-19	0.578468	0.0895939	6.45656	1.0711e-10	1.81346e-09	0.837943	0.0893267	9.38066	6.55585e-21	1.73116e-19	0.723593	0.0895651	8.07897	6.53186e-16	1.48882e-14	0.134879	0.09089	1.48398	0.137814	1	-0.296707
Aamdc	ENSRNOG00000012584	adipogenesis associated, Mth938 domain containing [Source:RGD Symbol;Acc:1561459]	984.451	-0.889751	0.269773	-3.29815	0.000973251	0.00794625	1.59042	0.269226	5.90739	3.4758e-09	5.367e-08	0.09269	0.268461	0.345265	0.729895	0.875638	0.607982	0.267911	2.26934	0.0232474	0.101988	1.99433	0.26899	7.41412	1.22433e-13	1.85781e-12	0.14662	0.27028	0.542473	0.587493	0.760739	1.32964	0.269555	4.93272	8.10915e-07	6.28384e-06	1.07725	0.268996	4.00472	6.20903e-05	0.000425702	0.0407762	0.272936	0.149398	0.881239	1	0.256617
Aamp	ENSRNOG00000014399	angio-associated, migratory cell protein [Source:RGD Symbol;Acc:1306281]	14145.4	0.101469	0.0762317	1.33106	0.18317	0.418637	-0.680932	0.0764357	-8.90857	5.16959e-19	1.93383e-17	-0.16712	0.0762827	-2.1908	0.0284661	0.109718	-0.412343	0.0764865	-5.39106	7.00426e-08	2.41859e-06	-0.291282	0.0763863	-3.81327	0.00013714	0.000717883	0.228532	0.0761026	3.00294	0.00267382	0.0119425	0.0890446	0.0762489	1.16781	0.242882	0.412259	0.213304	0.0761118	2.8025	0.00507078	0.0209963	0.086233	0.0765202	1.12693	0.259772	1	0.161105
Aanat	ENSRNOG00000011182	aralkylamine N-acetyltransferase [Source:RGD Symbol;Acc:2006]	9.76715	0.115434	0.273465	0.422115	0.672941	NA	-0.115608	0.273546	-0.422626	0.672568	NA	0	0.273469	0	1	NA	0	0.273551	0	1	NA	-0.253651	0.274071	-0.925497	0.354707	NA	-0.245547	0.27416	-0.895636	0.370447	NA	0	0.273791	0	1	NA	-0.255932	0.274096	-0.933731	0.350443	NA	0.0755719	0.231301	0.326725	0.743876	1	0.0772574
Aar2	ENSRNOG00000020086	AAR2 splicing factor homolog [Source:RGD Symbol;Acc:1311066]	868.334	0.317694	0.320388	0.99159	0.321398	0.581062	-0.891725	0.321009	-2.77788	0.00547146	0.0231396	-0.618017	0.321337	-1.92327	0.0544465	0.175696	0.0439857	0.321955	0.13662	0.891331	0.970636	-0.86175	0.32063	-2.68768	0.00719504	0.0243621	-0.0603962	0.319652	-0.188944	0.850137	0.925636	-1.02497	0.320706	-3.19598	0.00139355	0.00571582	-0.588994	0.319755	-1.84202	0.0654726	0.167011	-0.210417	0.321533	-0.65442	0.512841	1	0.0901591
Aard	ENSRNOG00000004708	alanine and arginine rich domain containing protein [Source:RGD Symbol;Acc:631378]	237.737	-0.665916	0.504878	-1.31896	0.187181	0.425175	1.04246	0.504837	2.06494	0.038929	0.114189	-1.10902	0.504935	-2.19635	0.0280667	0.108578	1.48556	0.504895	2.94231	0.00325773	0.0234113	1.03797	0.504762	2.05635	0.0397492	0.10223	-0.387122	0.504851	-0.766804	0.443198	0.649761	-0.377893	0.504978	-0.748335	0.454258	0.631999	0.269918	0.504749	0.534757	0.592818	0.758272	-0.00884159	0.504666	-0.0175197	0.986022	1	0.380982
Aars	ENSRNOG00000018404	alanyl-tRNA synthetase [Source:RGD Symbol;Acc:1304832]	5325.28	0.332833	0.161751	2.05769	0.0396197	0.146165	-0.240576	0.161674	-1.48803	0.136742	0.289859	0.25754	0.161734	1.59237	0.111301	0.286435	-0.165283	0.161657	-1.02243	0.306577	0.565986	0.06153	0.161588	0.380784	0.703364	0.824201	0.413114	0.16156	2.55703	0.010557	0.0382181	0.407371	0.161644	2.52018	0.0117294	0.0364558	0.118196	0.161653	0.73117	0.464675	0.658709	0.037905	0.16211	0.233822	0.815123	1	-0.110979
Aars2	ENSRNOG00000025808	alanyl-tRNA synthetase 2, mitochondrial [Source:RGD Symbol;Acc:1310617]	397.844	0.951493	0.425789	2.23466	0.0254398	0.104637	-0.106502	0.425022	-0.25058	0.802139	0.898261	0.410333	0.426077	0.963049	0.335523	0.57494	0.434657	0.425311	1.02197	0.306793	0.566076	0.591391	0.425114	1.39113	0.164185	0.308233	0.754962	0.425129	1.77584	0.075759	0.189527	-0.0848005	0.425357	-0.199363	0.841979	0.919526	0.315063	0.426165	0.739298	0.459726	0.654623	0.508948	0.427532	1.19043	0.233877	1	-0.0568027
Aarsd1	ENSRNOG00000020658	alanyl-tRNA synthetase domain containing 1 [Source:RGD Symbol;Acc:1561650]	7612.13	0.16035	0.121375	1.32112	0.186463	0.424132	-0.294864	0.121392	-2.42901	0.01514	0.053862	0.148179	0.121343	1.22116	0.222027	0.44622	-0.282693	0.121361	-2.32936	0.0198402	0.0911241	0.836802	0.12161	6.88104	5.94169e-12	7.97263e-11	1.18695	0.121558	9.76445	1.5998e-22	7.56872e-21	1.23341	0.121658	10.1383	3.73602e-24	1.17395e-22	1.13807	0.121583	9.36047	7.93824e-21	2.59821e-19	0.111451	0.122446	0.910202	0.362716	1	-0.0552742
Aasdhppt	ENSRNOG00000005795	aminoadipate-semialdehyde dehydrogenase-phosphopantetheinyl transferase [Source:RGD Symbol;Acc:1311360]	2150.63	0.890511	0.201293	4.42395	9.69142e-06	0.000138943	-0.409051	0.200812	-2.03698	0.041652	0.120485	0.644448	0.201367	3.20036	0.00137257	0.0103989	-0.162988	0.200887	-0.811343	0.417169	0.67292	0.38863	0.200965	1.93382	0.0531357	0.128658	0.814785	0.200763	4.05844	4.94023e-05	0.000348549	0.771031	0.201148	3.83316	0.000126509	0.000667826	0.100183	0.201449	0.497309	0.618971	0.776267	0.17572	0.203187	0.864816	0.38714	1	-0.0170848
Aass	ENSRNOG00000039494	aminoadipate-semialdehyde synthase [Source:RGD Symbol;Acc:1310811]	95.1604	-0.468791	0.506132	-0.926223	0.35433	0.612078	-0.265608	0.506252	-0.524656	0.599823	0.767658	-1.71757	0.506444	-3.39144	0.000695266	0.00595099	0.983175	0.50656	1.94088	0.0522722	0.181237	-0.363146	0.506144	-0.717476	0.47308	0.644781	0.890495	0.506285	1.75888	0.078598	0.194787	-1.09817	0.506485	-2.16822	0.030142	0.081467	0.945794	0.506083	1.86885	0.0616435	0.15972	-0.406068	0.506471	-0.80176	0.422692	1	-0.973022
Aatf	ENSRNOG00000002778	apoptosis antagonizing transcription factor [Source:RGD Symbol;Acc:620685]	700.721	-0.104421	0.280149	-0.372734	0.709346	0.866819	0.44418	0.279494	1.58923	0.112009	0.251445	-0.175124	0.280054	-0.625321	0.53176	0.742792	0.514883	0.279399	1.84282	0.065355	0.211115	0.0161575	0.278099	0.0580998	0.953669	0.977855	-0.554271	0.278847	-1.98773	0.046842	0.130187	-0.635943	0.278935	-2.2799	0.0226137	0.0639584	-0.238089	0.278659	-0.854412	0.392877	0.593988	0.211018	0.282237	0.747663	0.454664	1	0.125811
Aatk	ENSRNOG00000004392	apoptosis-associated tyrosine kinase [Source:RGD Symbol;Acc:1590980]	7625.08	0.861789	0.106617	8.08307	6.31539e-16	5.39872e-14	-0.315742	0.106317	-2.9698	0.00297993	0.0138567	0.7361	0.106618	6.90408	5.05311e-12	2.84809e-10	-0.190053	0.106319	-1.78757	0.0738456	0.231347	0.871135	0.106581	8.17349	2.99585e-16	5.42298e-15	1.01611	0.106409	9.54915	1.3076e-21	5.87817e-20	0.988061	0.106559	9.27248	1.81875e-20	4.70369e-19	0.368253	0.106809	3.44778	0.000565208	0.00308183	0.213877	0.107628	1.98719	0.0469011	1	0.17072
Abat	ENSRNOG00000002636	4-aminobutyrate aminotransferase [Source:RGD Symbol;Acc:620948]	4880.44	0.819904	0.140609	5.83109	5.50666e-09	1.62574e-07	-1.25647	0.140815	-8.92289	4.54291e-19	1.70447e-17	0.249229	0.140765	1.77053	0.0766388	0.224226	-0.685798	0.140971	-4.86483	1.14555e-06	2.85684e-05	0.490273	0.141364	3.46816	0.00052403	0.00242502	1.52816	0.140689	10.862	1.74952e-27	1.11561e-25	1.07379	0.141047	7.61299	2.6783e-14	4.48848e-13	0.574771	0.140855	4.08059	4.49215e-05	0.000316109	-0.133428	0.142215	-0.938211	0.348136	1	0.2185
Abca1	ENSRNOG00000018126	ATP-binding cassette, subfamily A (ABC1), member 1 [Source:RGD Symbol;Acc:631344]	112.732	0.418726	0.506314	0.827008	0.408233	0.665477	0.401779	0.506155	0.793785	0.42732	0.62694	0.23934	0.506325	0.472702	0.636426	0.818672	0.581164	0.506166	1.14817	0.250899	0.502718	0.514274	0.506086	1.01618	0.309544	0.483616	-0.105642	0.506133	-0.208724	0.834664	0.916492	0.214211	0.506247	0.423136	0.672196	0.803238	-0.538835	0.506194	-1.06448	0.28711	0.486771	-0.0143215	0.506182	-0.0282931	0.977428	1	0.215815
Abca13	ENSRNOG00000025645	ATP-binding cassette, subfamily A (ABC1), member 13 [Source:RGD Symbol;Acc:1305895]	3.9203	0	0.171745	0	1	NA	0	0.171791	0	1	NA	0	0.171812	0	1	NA	0	0.171857	0	1	NA	-0.0866251	0.172088	-0.503376	0.6147	NA	0	0.172009	0	1	NA	-0.127494	0.172046	-0.741046	0.458666	NA	-0.136722	0.172125	-0.794316	0.427012	NA	-0.136842	0.172183	-0.794744	0.426763	1	-0.0867533
Abca17	ENSRNOG00000039656	ATP-binding cassette, subfamily A (ABC1), member 17 [Source:RGD Symbol;Acc:1560494]	125.084	-0.871366	0.44043	-1.97845	0.0478784	0.16821	-0.233491	0.442456	-0.527716	0.597696	0.766185	-0.971164	0.440378	-2.2053	0.0274333	0.106884	-0.133694	0.442405	-0.302197	0.762502	0.910602	-0.202849	0.441355	-0.459606	0.645799	0.780254	-0.081523	0.440775	-0.184954	0.853265	0.927923	-0.153462	0.441127	-0.347886	0.727926	0.84372	0.429499	0.438352	0.979804	0.327183	0.529024	-0.354716	0.445443	-0.796322	0.425845	1	0.110271
Abca2	ENSRNOG00000014268	ATP-binding cassette, subfamily A (ABC1), member 2 [Source:RGD Symbol;Acc:620238]	12504.8	0.551622	0.111377	4.95277	7.31662e-07	1.38761e-05	-0.807514	0.111436	-7.24644	4.27878e-13	9.70758e-12	-0.227371	0.111564	-2.03804	0.0415459	0.145578	-0.0285207	0.111623	-0.25551	0.798329	0.926433	-0.494305	0.111387	-4.43772	9.09184e-06	5.86602e-05	0.235614	0.111164	2.11951	0.0340475	0.100246	-0.358602	0.11143	-3.21819	0.00129001	0.00535296	-0.145174	0.11131	-1.30423	0.192155	0.367426	0.170833	0.111072	1.53803	0.12404	1	0.0775954
Abca4	ENSRNOG00000012892	ATP-binding cassette, subfamily A (ABC1), member 4 [Source:RGD Symbol;Acc:1309445]	20.2713	0.775721	0.391293	1.98245	0.0474285	NA	-0.776403	0.391428	-1.98352	0.0473098	0.133088	0.0361496	0.390515	0.0925691	0.926246	0.979807	-0.0368317	0.390649	-0.0942834	0.924884	0.984777	-0.332625	0.391531	-0.849548	0.395576	0.572273	0.284777	0.392559	0.725439	0.468183	NA	-0.200993	0.391339	-0.513604	0.607529	0.754859	-0.663627	0.391809	-1.69375	0.0903126	NA	-0.152319	0.37091	-0.410663	0.68132	1	0.137347
Abca5	ENSRNOG00000004378	ATP-binding cassette, subfamily A (ABC1), member 5 [Source:RGD Symbol;Acc:628661]	108.951	0.245743	0.505876	0.485776	0.627126	0.819173	0.0517131	0.505936	0.102213	0.918588	0.964878	0.264227	0.505897	0.522295	0.601465	0.794015	0.0332287	0.505957	0.0656751	0.947637	0.993481	-0.271915	0.506035	-0.537345	0.59103	0.741487	0.0631007	0.50598	0.12471	0.900753	0.952979	-0.108737	0.505999	-0.214896	0.829848	0.913394	-0.452317	0.505981	-0.893941	0.371353	0.571738	-0.267381	0.505421	-0.529025	0.596788	1	-0.383567
Abca7	ENSRNOG00000012939	ATP-binding cassette, subfamily A (ABC1), member 7 [Source:RGD Symbol;Acc:1303134]	527.164	-0.594554	0.420019	-1.41554	0.15691	0.383406	0.401065	0.420076	0.954743	0.339708	0.542282	0.144357	0.419528	0.344094	0.730776	0.876192	-0.337847	0.419585	-0.805192	0.420709	0.675596	0.92672	0.420058	2.20617	0.0273721	0.0751632	0.17913	0.420133	0.426366	0.669841	0.816037	0.948705	0.419787	2.25997	0.0238233	0.0669277	0.967892	0.419775	2.30574	0.0211253	0.0686932	0.193538	0.421295	0.459389	0.645955	1	0.345301
Abca8a	ENSRNOG00000004147	ATP-binding cassette, subfamily A (ABC1), member 8a [Source:RGD Symbol;Acc:1307333]	854.13	0.188015	0.368046	0.510845	0.609459	0.810655	0.60411	0.367587	1.64345	0.10029	0.231975	0.129516	0.368008	0.351938	0.724885	0.872208	0.662608	0.367549	1.80278	0.0714234	0.225445	0.966389	0.367477	2.62979	0.00854364	0.0282664	0.432319	0.367848	1.17527	0.239888	0.438139	0.45493	0.367986	1.23627	0.216358	0.379699	0.519844	0.368028	1.41251	0.157799	0.32002	0.274955	0.369193	0.744746	0.456425	1	-0.0698975
Abcb10	ENSRNOG00000017993	ATP-binding cassette, subfamily B (MDR/TAP), member 10 [Source:RGD Symbol;Acc:1311222]	1757.25	0.153449	0.302859	0.50667	0.612386	0.812307	-0.283969	0.302886	-0.937542	0.34848	0.551365	0.656364	0.302596	2.16911	0.0300745	0.11427	-0.786883	0.302624	-2.6002	0.00931689	0.0525706	-0.319411	0.302637	-1.05543	0.291231	0.464691	0.362979	0.302682	1.19921	0.230447	0.426607	0.627694	0.302404	2.07568	0.0379234	0.0979168	0.0945819	0.302643	0.312519	0.754646	0.867145	-0.114856	0.303235	-0.378767	0.704861	1	-0.398108
Abcb11	ENSRNOG00000050860	ATP-binding cassette, subfamily B (MDR/TAP), member 11 [Source:RGD Symbol;Acc:619930]	2.00219	0.21513	0.170282	1.26337	0.206455	NA	-0.275606	0.170307	-1.6183	0.105599	NA	-0.0604922	0.17012	-0.355586	0.722151	NA	0	0.170145	0	1	NA	0	0.170555	0	1	NA	0.276093	0.17076	1.61685	0.10591	NA	0	0.170423	0	1	NA	0.0519676	0.170682	0.304469	0.76077	NA	-0.00898332	0.170957	-0.0525474	0.958093	1	0
Abcb1a	NA	NA	64.0069	0.57221	0.507857	1.12671	0.259863	0.515809	0.315454	0.507814	0.6212	0.534468	0.718397	1.22441	0.507819	2.41111	0.015904	0.0712902	-0.336744	0.507771	-0.663181	0.507215	0.747822	0.537271	0.507796	1.05804	0.290035	0.463264	-0.183615	0.507796	-0.361592	0.717657	0.845893	0.172327	0.507746	0.339397	0.734311	0.848323	-0.950251	0.507803	-1.8713	0.0613039	0.159018	-0.191062	0.507556	-0.376436	0.706593	1	0.396916
Abcb1b	NA	NA	13.529	0.230447	0.379729	0.606873	0.543935	NA	-0.0416378	0.380239	-0.109504	0.912802	0.961211	0.28924	0.380031	0.761095	0.4466	0.676466	-0.100431	0.380541	-0.263916	0.791845	0.923657	-0.337792	0.381393	-0.885681	0.37579	NA	-0.0484883	0.381047	-0.12725	0.898742	NA	-0.271836	0.381439	-0.712658	0.476057	0.650202	-0.247673	0.380789	-0.65042	0.515421	NA	0.0285137	0.368967	0.0772798	0.938401	1	-0.228703
Abcb4	ENSRNOG00000008012	ATP-binding cassette, subfamily B (MDR/TAP), member 4 [Source:RGD Symbol;Acc:620248]	139.455	0.891632	0.480445	1.85585	0.0634752	0.205805	-0.504276	0.479829	-1.05095	0.293282	0.49196	0.532532	0.480668	1.1079	0.267904	0.501005	-0.145176	0.480053	-0.302417	0.762334	0.910602	-0.786652	0.479273	-1.64135	0.100726	0.213268	0.030688	0.47903	0.0640629	0.94892	0.976542	-0.418274	0.479326	-0.872628	0.382866	0.564817	-0.660462	0.480073	-1.37575	0.168898	0.336006	0.198144	0.48117	0.411797	0.680488	1	-0.309791
Abcb6	ENSRNOG00000018697	ATP-binding cassette, subfamily B (MDR/TAP), member 6 [Source:RGD Symbol;Acc:71077]	1483.25	-0.0442245	0.210222	-0.210371	0.833378	0.928092	0.0703394	0.210095	0.334799	0.737777	0.858292	0.188702	0.209823	0.899339	0.368472	0.607418	-0.162587	0.209695	-0.775349	0.438134	0.689347	-0.00899846	0.209444	-0.0429636	0.965731	0.98339	-0.0665576	0.209639	-0.317487	0.750874	0.866777	0.281948	0.209529	1.34563	0.178422	0.32984	-0.442771	0.209167	-2.11682	0.0342748	0.100638	-0.419729	0.212084	-1.97907	0.0478077	1	-0.0127587
Abcb7	ENSRNOG00000002790	ATP-binding cassette, subfamily B (MDR/TAP), member 7 [Source:RGD Symbol;Acc:1303086]	82.4348	-0.0367516	0.491647	-0.074752	0.940412	0.973864	-0.424315	0.491458	-0.86338	0.387929	0.590586	0.42871	0.491866	0.871598	0.383428	0.619527	-0.889776	0.491677	-1.80968	0.0703461	0.223186	-0.573681	0.49171	-1.16671	0.243329	0.410255	-0.118571	0.491873	-0.241059	0.809509	0.902334	0.37065	0.492024	0.753317	0.45126	0.629859	-0.610083	0.492051	-1.23988	0.215021	0.397176	-0.524244	0.491095	-1.0675	0.285746	1	-0.0305141
Abcb8	ENSRNOG00000008557	ATP-binding cassette, subfamily B (MDR/TAP), member 8 [Source:RGD Symbol;Acc:1307655]	1247.89	0.431806	0.388069	1.11271	0.265835	0.520874	-1.35759	0.388664	-3.49297	0.000477678	0.00289026	0.155922	0.388133	0.401723	0.687888	0.849481	-1.08171	0.388728	-2.78268	0.00539115	0.034696	-1.74454	0.388392	-4.49168	7.06622e-06	4.63699e-05	-0.2465	0.387634	-0.635909	0.524835	0.714788	-0.625575	0.387722	-1.61346	0.106644	0.223364	-0.537134	0.387817	-1.38502	0.166047	0.331983	0.141107	0.387495	0.364152	0.715744	1	-0.140382
Abcb9	ENSRNOG00000001082	ATP-binding cassette, subfamily B (MDR/TAP), member 9 [Source:RGD Symbol;Acc:620254]	1838.87	-0.222319	0.280247	-0.793296	0.427605	0.683079	0.862333	0.279785	3.08213	0.00205525	0.0101344	0.566775	0.279596	2.02712	0.0426503	0.14825	0.0732395	0.279133	0.262382	0.793027	0.924377	-0.089561	0.278882	-0.321143	0.748102	0.854467	-0.782757	0.279613	-2.79943	0.00511926	0.0207261	-0.021713	0.27903	-0.0778158	0.937975	0.973928	-0.591672	0.279329	-2.11819	0.0341589	0.10036	-0.0312069	0.279775	-0.111543	0.911186	1	-0.168991
Abcc1	ENSRNOG00000022305	ATP-binding cassette, subfamily C (CFTR/MRP), member 1 [Source:RGD Symbol;Acc:3112]	1012.25	0.284508	0.330731	0.860238	0.389658	0.647685	-0.373532	0.330735	-1.1294	0.25873	0.451852	-0.476542	0.33117	-1.43897	0.15016	0.348737	0.387518	0.331174	1.17013	0.241947	0.492313	0.725103	0.331099	2.18999	0.0285249	0.077635	0.596113	0.330582	1.80322	0.0713533	0.181131	-0.0857113	0.331192	-0.258797	0.795792	0.889964	0.217821	0.330613	0.65884	0.509999	0.693963	-0.0936115	0.332172	-0.281816	0.778084	1	0.501545
Abcc10	ENSRNOG00000018863	ATP-binding cassette, subfamily C (CFTR/MRP), member 10 [Source:RGD Symbol;Acc:1306696]	198.51	-0.339023	0.503289	-0.673616	0.500556	0.738971	0.27892	0.503285	0.5542	0.579442	0.753386	-0.707256	0.503352	-1.40509	0.159993	0.362008	0.647153	0.503347	1.2857	0.198548	0.435069	-0.413066	0.503086	-0.821065	0.411609	0.587447	-0.651687	0.503166	-1.29517	0.195261	0.380249	-0.291766	0.503362	-0.579634	0.562161	0.719752	0.0580857	0.503115	0.115452	0.908087	0.953945	0.368879	0.503134	0.733164	0.463459	1	-0.0401165
Abcc12	ENSRNOG00000015666	ATP-binding cassette, subfamily C (CFTR/MRP), member 12 [Source:RGD Symbol;Acc:735100]	17.2298	0	0.347899	0	1	NA	0.767659	0.348775	2.20101	0.0277351	0.087787	0.0667238	0.348141	0.191657	0.848011	0.942166	0.701054	0.349017	2.00865	0.044574	0.162187	0.631397	0.349531	1.80641	0.070854	0.161962	-0.305919	0.348787	-0.877094	0.380436	NA	-0.276471	0.348897	-0.792414	0.428119	0.607614	-0.192859	0.34885	-0.552843	0.580371	NA	0.0979867	0.330376	0.296591	0.766779	1	0.146201
Abcc2	ENSRNOG00000046727	ATP-binding cassette, subfamily C (CFTR/MRP), member 2 [Source:RGD Symbol;Acc:2366]	146.355	0.338897	0.423176	0.800842	0.423223	0.679112	-0.109276	0.422373	-0.258719	0.795852	0.89377	0.00978503	0.423691	0.0230947	0.981575	1	0.219836	0.42289	0.519842	0.603174	0.818449	-0.0938385	0.421328	-0.22272	0.823753	0.901763	-0.498986	0.420574	-1.18644	0.235449	0.432725	-0.207502	0.422332	-0.491324	0.623197	0.765761	-0.178323	0.422067	-0.422501	0.67266	0.813449	0.650498	0.426923	1.52369	0.127586	1	0.507502
Abcc3	ENSRNOG00000002948	ATP-binding cassette, subfamily C (CFTR/MRP), member 3 [Source:RGD Symbol;Acc:71101]	71.4881	0.459286	0.497643	0.922924	0.356047	0.613587	-0.600419	0.497697	-1.20639	0.227666	0.415411	-0.0552417	0.497957	-0.110937	0.911666	0.972836	-0.0858907	0.498011	-0.172467	0.86307	0.957005	0.325185	0.497995	0.652989	0.513763	0.679873	0.658307	0.497342	1.32365	0.18562	0.367512	-0.219952	0.497545	-0.442075	0.658435	0.79362	-0.518224	0.4972	-1.04229	0.297279	0.497137	-0.703294	0.499075	-1.40919	0.158778	1	0.260633
Abcc4	ENSRNOG00000010064	ATP-binding cassette, subfamily C (CFTR/MRP), member 4 [Source:RGD Symbol;Acc:620266]	129.902	0.380186	0.506314	0.75089	0.452719	0.703321	-1.31681	0.506489	-2.59987	0.00932591	0.036279	0.427119	0.506294	0.843619	0.398882	0.633805	-1.36374	0.506469	-2.69264	0.00708889	0.0426521	-1.05809	0.506455	-2.08921	0.0366885	0.0955474	0.493717	0.506252	0.975241	0.329441	0.541705	0.370204	0.506235	0.731288	0.464603	0.640246	-0.0792814	0.506265	-0.156601	0.87556	0.936807	-0.190991	0.506275	-0.377247	0.70599	1	-0.232817
Abcc5	ENSRNOG00000029178	ATP-binding cassette, subfamily C (CFTR/MRP), member 5 [Source:RGD Symbol;Acc:70913]	2620.29	0.106004	0.24643	0.430159	0.66708	0.843715	-0.174203	0.246423	-0.706927	0.479612	0.673622	0.152581	0.246361	0.619336	0.535695	0.745484	-0.22078	0.246355	-0.896186	0.370153	0.628371	0.609605	0.246533	2.47271	0.0134091	0.0412441	0.586697	0.246394	2.38113	0.0172594	0.0580409	0.326128	0.246282	1.32421	0.185435	0.339114	0.375099	0.246328	1.52276	0.127818	0.275679	-0.105538	0.247038	-0.427215	0.669223	1	0.197005
Abcc6	ENSRNOG00000028781	ATP-binding cassette, subfamily C (CFTR/MRP), member 6 [Source:RGD Symbol;Acc:620268]	72.8248	-0.280464	0.423466	-0.662306	0.507775	0.744472	0.172521	0.423456	0.407412	0.683705	0.826218	-0.37591	0.423478	-0.887673	0.374717	0.611665	0.267967	0.423468	0.632791	0.52687	0.763469	0.462206	0.42357	1.09122	0.275178	0.447797	-0.539313	0.423707	-1.27284	0.203074	0.391242	0.174916	0.423398	0.413125	0.679515	0.80948	-0.0211603	0.423819	-0.0499277	0.96018	0.980422	0.237005	0.423242	0.559976	0.575496	1	0.825685
Abcc8	ENSRNOG00000021130	ATP-binding cassette, subfamily C (CFTR/MRP), member 8 [Source:RGD Symbol;Acc:3786]	571.525	0.177567	0.374445	0.474215	0.635346	0.823384	0.361987	0.373835	0.968307	0.332891	0.535052	0.722251	0.373866	1.93185	0.0533783	0.173273	-0.182697	0.373254	-0.489472	0.624508	0.833313	-0.072338	0.373056	-0.193906	0.846249	0.913994	0.495768	0.374176	1.32496	0.185185	0.366774	0.177612	0.373053	0.476104	0.634	0.773816	0.0450692	0.373974	0.120514	0.904076	0.951997	-0.27206	0.376221	-0.723139	0.469595	1	-0.926694
Abcc9	ENSRNOG00000036960	ATP-binding cassette, subfamily C (CFTR/MRP), member 9 [Source:RGD Symbol;Acc:3787]	50.8919	0.401685	0.406617	0.987871	0.323216	0.582969	-0.54172	0.406582	-1.33238	0.182736	0.357314	-0.208543	0.406345	-0.513217	0.6078	0.798352	0.0685085	0.40631	0.168611	0.866102	0.957941	-0.226294	0.406683	-0.556438	0.577912	0.731074	0.234068	0.406964	0.575158	0.565184	0.746433	-0.356098	0.406603	-0.875786	0.381146	0.563073	-0.502852	0.406915	-1.23577	0.216545	0.398954	-0.333198	0.40593	-0.820824	0.411746	1	0.0807495
Abcd1	ENSRNOG00000056524	ATP-binding cassette, subfamily D (ALD), member 1 [Source:RGD Symbol;Acc:1562128]	339.057	0.503787	0.501055	1.00545	0.314679	0.574629	-0.717397	0.50108	-1.4317	0.152229	0.312745	0.434555	0.501049	0.867291	0.385782	0.621813	-0.648165	0.501074	-1.29355	0.19582	0.43112	-0.577905	0.501033	-1.15343	0.248735	0.416569	0.0458902	0.500921	0.0916116	0.927007	0.967408	-0.10724	0.500926	-0.214084	0.830482	0.913559	-0.577999	0.500973	-1.15375	0.248601	0.440313	-0.119881	0.500731	-0.239411	0.810787	1	0.0934186
Abcd2	ENSRNOG00000015538	ATP-binding cassette, subfamily D (ALD), member 2 [Source:RGD Symbol;Acc:69244]	1655.38	0.521472	0.233531	2.23299	0.0255497	0.104982	0.0665056	0.232943	0.285502	0.77526	0.882471	0.78662	0.233268	3.37218	0.000745769	0.00628255	-0.198643	0.232679	-0.853722	0.393259	0.651064	0.184928	0.232652	0.794868	0.42669	0.601635	0.809943	0.233259	3.47228	0.000516051	0.00288875	0.342573	0.232593	1.47285	0.140793	0.276461	0.446367	0.233724	1.9098	0.0561584	0.14888	0.15767	0.235804	0.668649	0.503719	1	-0.690565
Abcd3	ENSRNOG00000011929	ATP-binding cassette, subfamily D (ALD), member 3 [Source:RGD Symbol;Acc:2007]	1805.08	0.0200248	0.184145	0.108745	0.913405	0.962827	0.416084	0.183798	2.26381	0.0235861	0.077021	-0.0312468	0.184091	-0.169735	0.865218	0.950524	0.467355	0.183744	2.54351	0.0109746	0.0591761	2.34705	0.185633	12.6435	1.21528e-36	5.47143e-35	1.60715	0.185328	8.67192	4.24909e-18	1.48526e-16	1.52285	0.185563	8.20662	2.27495e-16	4.42628e-15	1.77832	0.185387	9.59247	8.59977e-22	2.98556e-20	0.190904	0.189945	1.00505	0.314872	1	0.323345
Abcd4	ENSRNOG00000011964	ATP-binding cassette, subfamily D (ALD), member 4 [Source:RGD Symbol;Acc:1307273]	203.206	-0.203058	0.506528	-0.400882	0.688507	0.856716	-0.165503	0.506553	-0.326723	0.743877	0.862607	-0.0383493	0.506504	-0.0757138	0.939647	0.986499	-0.330211	0.506529	-0.65191	0.51446	0.753466	0.231323	0.50654	0.456672	0.647907	0.782261	-0.123807	0.506495	-0.244438	0.806892	0.900957	0.17957	0.506493	0.354535	0.722938	0.840526	-0.119534	0.506457	-0.236021	0.813417	0.902756	-0.197942	0.506302	-0.390956	0.69583	1	0.517846
Abce1	ENSRNOG00000018345	ATP-binding cassette, subfamily E (OABP), member 1 [Source:RGD Symbol;Acc:1305301]	2740.13	0.0661842	0.225334	0.293716	0.768975	0.897401	-0.552993	0.225589	-2.45133	0.0142328	0.0513617	-0.361396	0.225516	-1.60253	0.109038	0.282287	-0.125413	0.22577	-0.55549	0.57856	0.802994	-0.58276	0.225335	-2.58619	0.00970431	0.0315544	0.0582295	0.225077	0.25871	0.795859	0.894084	-0.423447	0.225317	-1.87934	0.0601978	0.141505	-0.176489	0.224993	-0.784419	0.432794	0.630684	-0.168433	0.225777	-0.746013	0.455659	1	-0.0879436
Abcf1	ENSRNOG00000000799	ATP-binding cassette, subfamily F (GCN20), member 1 [Source:RGD Symbol;Acc:620286]	9660.43	-0.203478	0.0880199	-2.31173	0.0207927	0.0897103	0.658693	0.0878594	7.49713	6.52317e-14	1.63326e-12	0.450235	0.087769	5.12978	2.90087e-07	6.59333e-06	0.00497984	0.087608	0.0568423	0.954671	0.996368	2.37821	0.088611	26.8388	1.14055e-158	6.67547e-156	1.42567	0.0885832	16.0942	2.80394e-58	9.96929e-56	2.07527	0.0884927	23.4514	1.28014e-121	9.46478e-119	1.80902	0.0885158	20.4373	7.79583e-93	2.60121e-90	0.179839	0.0900572	1.99694	0.045832	1	0.293791
Abcf2	ENSRNOG00000010609	ATP-binding cassette, subfamily F (GCN20), member 2 [Source:RGD Symbol;Acc:1304942]	5746.07	0.291756	0.186658	1.56306	0.118039	0.318001	-0.112788	0.186575	-0.604517	0.5455	0.727691	0.251812	0.186635	1.34922	0.177267	0.386841	-0.0728431	0.186553	-0.390469	0.696189	0.877146	0.242801	0.186523	1.30172	0.193012	0.346272	0.662663	0.186596	3.55132	0.000383301	0.00221978	0.419013	0.186574	2.24583	0.0247147	0.0691115	0.398241	0.186644	2.13369	0.0328679	0.0975661	0.0273319	0.186657	0.146428	0.883583	1	-0.307051
Abcf3	ENSRNOG00000001710	ATP-binding cassette, subfamily F (GCN20), member 3 [Source:RGD Symbol;Acc:1310468]	3082.82	0.151765	0.199612	0.760302	0.447074	0.699717	-0.17806	0.199576	-0.892187	0.372293	0.575778	0.220592	0.199508	1.10568	0.268864	0.502207	-0.246886	0.199472	-1.2377	0.215828	0.458234	-0.266913	0.199273	-1.33943	0.180429	0.329861	0.0947369	0.199289	0.475373	0.634521	0.792341	0.00408839	0.199203	0.0205237	0.983626	0.995907	-0.0312037	0.199317	-0.156553	0.875597	0.936807	0.0258095	0.200231	0.128899	0.897438	1	-0.183481
Abcg1	ENSRNOG00000001158	ATP-binding cassette, subfamily G (WHITE), member 1 [Source:RGD Symbol;Acc:620294]	2371.79	0.148831	0.185078	0.804151	0.42131	0.677347	-0.407512	0.185234	-2.19999	0.0278078	0.0879508	-0.164064	0.185235	-0.885709	0.375774	0.612833	-0.0946161	0.18539	-0.510362	0.609798	0.823223	-0.336321	0.184923	-1.81871	0.0689563	0.158538	0.230992	0.18474	1.25037	0.211166	0.40234	-0.109483	0.185008	-0.591773	0.554003	0.71301	-0.00858315	0.184705	-0.0464695	0.962936	0.981529	-0.0906551	0.186711	-0.485537	0.627295	1	-0.159646
Abcg2	ENSRNOG00000007041	ATP-binding cassette, subfamily G (WHITE), member 2 [Source:RGD Symbol;Acc:631345]	138.327	0.656288	0.507869	1.29224	0.196275	0.436484	-0.504847	0.507868	-0.994051	0.320198	0.521588	0.0829223	0.507872	0.163274	0.870303	0.953026	0.0685186	0.507871	0.134913	0.89268	0.971185	-0.0414529	0.507868	-0.0816215	0.934948	0.965625	0.497902	0.507865	0.980382	0.326898	0.538465	-0.456936	0.507867	-0.899716	0.368272	0.550768	-0.574491	0.507865	-1.13119	0.257976	0.451458	-0.413145	0.507561	-0.813981	0.415656	1	-0.0342294
Abcg3	NA	NA	10.3279	-0.0708575	0.356429	-0.198798	0.842421	NA	0.433815	0.357243	1.21434	0.224618	NA	-0.0549077	0.356722	-0.153923	0.87767	NA	0.417865	0.357536	1.16874	0.24251	NA	0.12527	0.358712	0.349221	0.726923	NA	-0.269395	0.357686	-0.75316	0.451354	NA	-0.379915	0.357879	-1.06157	0.288429	NA	-0.370232	0.358264	-1.03341	0.301414	NA	-0.155738	0.344032	-0.452684	0.650776	1	-0.0352816
Abcg3l1	ENSRNOG00000030216	ATP-binding cassette, subfamily G (WHITE), member 3-like 1 [Source:RGD Symbol;Acc:1303294]	77.6965	-0.271881	0.501621	-0.542004	0.587816	0.796761	0.43624	0.501681	0.869556	0.384543	0.587604	-0.0276755	0.501726	-0.0551606	0.956011	0.993076	0.192035	0.501786	0.382702	0.701941	0.879455	0.755289	0.501751	1.50531	0.132245	0.262143	0.687507	0.501499	1.3709	0.170405	0.346569	0.6503	0.501631	1.29637	0.194848	0.351788	0.811891	0.501682	1.61834	0.10559	0.239015	-0.144893	0.500465	-0.289516	0.772186	1	-0.362522
Abcg3l2	NA	NA	0.590998	0.0840212	0.163572	0.513666	0.607485	NA	-0.0842829	0.163828	-0.51446	0.606931	NA	0	0.163681	0	1	NA	0	0.163938	0	1	NA	-0.0276951	0.165143	-0.167704	0.866816	NA	0.0566339	0.165151	0.342921	0.731658	NA	-0.152826	0.165083	-0.925758	0.354572	NA	-0.0243496	0.165286	-0.147318	0.882881	NA	0.00302865	0.16668	0.0181704	0.985503	1	-4.59917e-05
Abcg3l3	ENSRNOG00000039890	ATP-binding cassette, subfamily G (WHITE), member 3-like 3 [Source:RGD Symbol;Acc:1564709]	21.2041	-0.122014	0.388123	-0.314368	0.753241	NA	0.0533219	0.388141	0.137378	0.890732	0.950106	0.37937	0.388837	0.975653	0.329237	0.568041	-0.448061	0.388855	-1.15226	0.249215	0.5011	-0.305918	0.389095	-0.786228	0.431734	0.60645	-0.2112	0.388792	-0.54322	0.586978	NA	0.388539	0.389232	0.99822	0.318173	0.49734	-0.466835	0.389353	-1.199	0.230527	NA	-0.370833	0.386719	-0.958921	0.337599	1	-0.145057
Abcg3l4	NA	NA	1.12989	0.131785	0.18234	0.722742	0.469839	NA	-0.132	0.182524	-0.723192	0.469562	NA	0	0.182315	0	1	NA	0	0.182499	0	1	NA	-0.0728798	0.183428	-0.397321	0.691131	NA	0.0779511	0.183506	0.424787	0.670992	NA	-0.0422262	0.183124	-0.230588	0.817635	NA	-0.0971144	0.183555	-0.529075	0.596754	NA	-0.0364822	0.169827	-0.21482	0.829908	1	-0.0158459
Abcg4	ENSRNOG00000008862	ATP-binding cassette, subfamily G (WHITE), member 4 [Source:RGD Symbol;Acc:1305840]	1561.91	0.431086	0.285324	1.51086	0.130824	0.34135	-0.547465	0.28535	-1.91858	0.055038	0.149043	0.0601678	0.28548	0.21076	0.833074	0.934928	-0.176548	0.285506	-0.618368	0.536333	0.77151	-0.255959	0.285215	-0.897424	0.369493	0.545816	0.266504	0.284893	0.935455	0.349554	0.56227	-0.312448	0.285047	-1.09613	0.273022	0.446883	-0.299411	0.285041	-1.05041	0.293529	0.493473	-0.134676	0.286009	-0.47088	0.637727	1	0.0249739
Abcg5	ENSRNOG00000005250	ATP-binding cassette, subfamily G (WHITE), member 5 [Source:RGD Symbol;Acc:620298]	29.1635	1.02238	0.453229	2.25576	0.0240854	NA	-0.165195	0.454576	-0.363404	0.716303	0.84569	0.0154533	0.452031	0.0341865	0.972728	0.998956	0.84173	0.453379	1.85657	0.0633723	0.207051	0.545883	0.454409	1.2013	0.229633	0.393041	0.0752228	0.455057	0.165304	0.868704	NA	-0.364981	0.453158	-0.805417	0.420579	0.601411	-0.77103	0.453636	-1.69967	0.0891933	0.211654	0.167706	0.446835	0.375319	0.707423	1	0.598287
Abcg8	ENSRNOG00000005420	ATP-binding cassette, subfamily G (WHITE), member 8 [Source:RGD Symbol;Acc:620300]	7.52541	-0.333942	0.179784	-1.85746	0.0632452	NA	0	0.179701	0	1	NA	-0.333994	0.179829	-1.85729	0.0632704	NA	0	0.179746	0	1	NA	0	0.179879	0	1	NA	-0.0376265	0.179858	-0.209202	0.834291	NA	-0.014652	0.17984	-0.0814723	0.935066	NA	0.334201	0.180009	1.85658	0.0633712	NA	0.0341608	0.172592	0.197928	0.843102	1	0.0341162
Abhd1	ENSRNOG00000025689	abhydrolase domain containing 1 [Source:RGD Symbol;Acc:1310988]	749.986	-0.386622	0.401438	-0.963091	0.335502	0.594668	-0.392601	0.401823	-0.977052	0.328544	0.530439	-1.16993	0.401917	-2.91087	0.00360419	0.0223488	0.390707	0.402301	0.971182	0.331458	0.591103	-0.34632	0.40158	-0.862394	0.388471	0.565053	-0.105259	0.401329	-0.262277	0.793108	0.89229	-0.767567	0.401937	-1.90967	0.0561755	0.134387	0.209838	0.40105	0.523221	0.600821	0.763451	-0.0713937	0.401922	-0.177631	0.859013	1	0.151256
Abhd11	ENSRNOG00000018910	abhydrolase domain containing 11 [Source:RGD Symbol;Acc:1304681]	1375.38	-0.141917	0.288894	-0.491243	0.623255	0.818096	-0.219927	0.289081	-0.76078	0.446789	0.644962	-0.391503	0.288986	-1.35475	0.175499	0.384226	0.0296584	0.289173	0.102563	0.91831	0.982485	0.0632872	0.288915	0.219051	0.82661	0.903501	0.150899	0.288745	0.522602	0.601251	0.769793	-0.0898155	0.288953	-0.310831	0.755929	0.865246	0.38966	0.288609	1.35013	0.176975	0.346507	0.0967077	0.290158	0.333293	0.738913	1	0.132126
Abhd12	ENSRNOG00000036934	abhydrolase domain containing 12 [Source:RGD Symbol;Acc:1562570]	8612.35	0.00513829	0.0985837	0.0521211	0.958432	0.98111	-0.0302723	0.0985483	-0.307182	0.758705	0.872405	-0.550898	0.0989052	-5.56995	2.54807e-08	7.21322e-07	0.525764	0.09887	5.31773	1.05072e-07	3.4754e-06	-0.834529	0.0979898	-8.51648	1.64473e-17	3.19358e-16	-0.731328	0.0980472	-7.45895	8.72177e-14	2.05075e-12	-1.18822	0.0984562	-12.0685	1.54861e-33	7.48635e-32	-0.682401	0.0980104	-6.96254	3.34201e-12	5.62244e-11	0.0540546	0.098462	0.54899	0.583012	1	-0.0729126
Abhd13	ENSRNOG00000014598	abhydrolase domain containing 13 [Source:RGD Symbol;Acc:1308317]	1126.25	-0.557033	0.344854	-1.61527	0.106252	0.296016	0.150797	0.345068	0.437007	0.662106	0.812062	-0.420697	0.344646	-1.22066	0.222214	0.446393	0.0144605	0.344861	0.0419315	0.966553	1	-0.454141	0.344365	-1.31878	0.187244	0.338842	-0.76259	0.344502	-2.2136	0.0268564	0.0832297	-0.680643	0.344349	-1.97661	0.0480859	0.118645	-0.151413	0.344045	-0.440097	0.659867	0.804294	0.0540713	0.344811	0.156814	0.875391	1	0.157442
Abhd14a	ENSRNOG00000011936	abhydrolase domain containing 14A [Source:RGD Symbol;Acc:1309721]	900.431	-0.701494	0.424667	-1.65187	0.0985611	0.28092	0.331728	0.424775	0.78095	0.434832	0.63367	-0.398976	0.42446	-0.93996	0.347238	0.58804	0.0292098	0.424569	0.0687989	0.94515	0.992815	-0.172111	0.424353	-0.405584	0.685048	0.811012	-0.52249	0.424552	-1.23068	0.218441	0.411849	-0.541909	0.424316	-1.27714	0.201554	0.360977	-0.339743	0.424089	-0.801112	0.423067	0.621941	-0.518339	0.424153	-1.22206	0.221687	1	0.0186346
Abhd14b	ENSRNOG00000012073	abhydrolase domain containing 14b [Source:RGD Symbol;Acc:1359649]	1271.41	-0.00521036	0.249255	-0.0209038	0.983322	0.993382	-0.108227	0.24929	-0.434142	0.664185	0.813421	0.419078	0.248724	1.68491	0.0920057	0.25085	-0.532516	0.248759	-2.14069	0.0322994	0.12906	-0.206789	0.248679	-0.831548	0.405664	0.58146	-0.145202	0.248618	-0.584036	0.559196	0.742032	0.085387	0.248092	0.344174	0.730715	0.845553	-0.19251	0.248448	-0.774849	0.438429	0.635106	-0.0524194	0.2508	-0.209009	0.834441	1	0.0465529
Abhd15	ENSRNOG00000015002	abhydrolase domain containing 15 [Source:RGD Symbol;Acc:1304598]	38.8542	0.0114588	0.434063	0.0263989	0.978939	NA	0.535003	0.434718	1.23069	0.218439	0.402651	0.0075009	0.434208	0.0172749	0.986217	1	0.538961	0.434862	1.23938	0.215204	0.45731	-0.225074	0.435835	-0.516419	0.605561	0.75062	-0.36615	0.43495	-0.841821	0.399888	0.612039	-1.00484	0.435346	-2.30813	0.0209917	0.0599374	-0.730485	0.435254	-1.67829	0.0932896	0.218994	-0.347807	0.433753	-0.801854	0.422637	1	-0.388374
Abhd16a	ENSRNOG00000056637	abhydrolase domain containing 16A [Source:RGD Symbol;Acc:1303164]	4773.77	-0.227234	0.194881	-1.16602	0.243608	0.497059	0.461299	0.194754	2.36862	0.0178546	0.0616015	0.0148295	0.194711	0.0761614	0.939291	0.986441	0.219235	0.194584	1.12668	0.259876	0.512341	-0.283037	0.194301	-1.4567	0.1452	0.282026	-0.37144	0.194633	-1.90842	0.0563374	0.150708	-0.369389	0.194453	-1.89963	0.0574811	0.136782	-0.155521	0.194468	-0.799728	0.423868	0.622738	-0.0113133	0.194521	-0.0581599	0.953621	1	-0.37283
Abhd16b	ENSRNOG00000015067	abhydrolase domain containing 16B [Source:RGD Symbol;Acc:1309726]	2.69162	0.110995	0.171167	0.648459	0.516688	NA	-0.205789	0.171157	-1.20234	0.229233	NA	-0.0948054	0.171101	-0.554089	0.579518	NA	0	0.171092	0	1	NA	0	0.171385	0	1	NA	0.206139	0.171481	1.20211	0.229321	NA	-0.0479837	0.171322	-0.280079	0.779417	NA	0.0952348	0.171499	0.55531	0.578683	NA	0	0.171608	0	1	1	0
Abhd17a	ENSRNOG00000018212	abhydrolase domain containing 17A [Source:RGD Symbol;Acc:1359682]	12247.9	0.349162	0.126966	2.75003	0.00595894	0.0340957	-0.339328	0.126944	-2.67305	0.00751649	0.0303973	0.527797	0.126913	4.15874	3.20009e-05	0.000432494	-0.517963	0.12689	-4.08197	4.46549e-05	0.000695498	0.300778	0.126963	2.36903	0.017835	0.0525683	0.882057	0.12696	6.94754	3.71707e-12	7.40448e-11	0.920769	0.126922	7.25462	4.02787e-13	6.09956e-12	0.571386	0.127005	4.49892	6.82993e-06	5.57345e-05	0.0384925	0.126728	0.303742	0.761325	1	-0.241963
Abhd17b	ENSRNOG00000012514	abhydrolase domain containing 17B [Source:RGD Symbol;Acc:1305246]	2252.94	0.445506	0.335684	1.32716	0.184456	0.420821	-0.686663	0.335757	-2.04512	0.0408432	0.118613	-0.438599	0.336013	-1.30531	0.191789	0.408677	0.197443	0.336086	0.587477	0.556884	0.787431	-1.0467	0.335536	-3.1195	0.00181161	0.00724114	-0.262211	0.335314	-0.781988	0.434222	0.642376	-1.11005	0.335691	-3.30676	0.000943816	0.00405705	-0.736351	0.335443	-2.19516	0.0281519	0.0863768	-0.0286361	0.334793	-0.0855335	0.931837	1	-0.0978355
Abhd17c	ENSRNOG00000012683	abhydrolase domain containing 17C [Source:RGD Symbol;Acc:1308210]	1932.28	0.670521	0.302963	2.21321	0.026883	0.109011	-0.222879	0.302681	-0.73635	0.461518	0.657987	-0.262845	0.303405	-0.866316	0.386317	0.622276	0.710487	0.303124	2.34388	0.0190841	0.0886105	-0.124831	0.302523	-0.412635	0.679874	0.807371	0.103975	0.302465	0.343759	0.731028	0.853829	-0.588862	0.30306	-1.94305	0.0520095	0.126198	-0.630678	0.302738	-2.08325	0.0372284	0.107523	-0.0640966	0.302764	-0.211705	0.832337	1	-0.00592402
Abhd2	ENSRNOG00000017120	abhydrolase domain containing 2 [Source:RGD Symbol;Acc:1311389]	289.359	-0.375729	0.444718	-0.844871	0.398183	0.656003	1.2603	0.443852	2.83946	0.00451894	0.019708	0.243332	0.443789	0.548306	0.583481	0.78102	0.641241	0.442919	1.44776	0.147684	0.360364	0.301808	0.442332	0.68231	0.495043	0.663386	-0.83174	0.443822	-1.87404	0.0609248	0.160276	-0.582479	0.44279	-1.31547	0.188351	0.343099	-0.280637	0.443274	-0.633101	0.526668	0.706774	0.174281	0.44473	0.391881	0.695146	1	-0.125996
Abhd3	ENSRNOG00000029370	abhydrolase domain containing 3 [Source:RGD Symbol;Acc:1310655]	3648.45	-0.0538548	0.13415	-0.401452	0.688087	0.856611	-0.0368479	0.134156	-0.274664	0.783574	0.886737	-0.191412	0.134164	-1.4267	0.153667	0.35355	0.100709	0.134171	0.750604	0.452891	0.701736	-0.20357	0.133687	-1.52273	0.127826	0.255589	-0.193994	0.133714	-1.45082	0.14683	0.310071	0.121079	0.134129	0.9027	0.366685	0.549443	0.136897	0.133713	1.02381	0.305925	0.506865	0.276854	0.135596	2.04175	0.0411762	1	0.027253
Abhd4	ENSRNOG00000009244	abhydrolase domain containing 4 [Source:RGD Symbol;Acc:1311858]	2689.38	1.26201	0.1981	6.37057	1.88332e-10	7.54317e-09	-1.12274	0.197793	-5.67633	1.37615e-08	1.95004e-07	0.772407	0.198366	3.89386	9.86624e-05	0.00115357	-0.633139	0.198059	-3.19671	0.00139003	0.0118289	-1.28468	0.197436	-6.50681	7.67652e-11	9.36962e-10	-0.176737	0.196479	-0.899521	0.368375	0.581463	-0.643102	0.19684	-3.26713	0.00108643	0.00458386	-1.59529	0.19762	-8.07254	6.88521e-16	1.56342e-14	-0.15643	0.197712	-0.791204	0.428825	1	0.0147843
Abhd5	ENSRNOG00000000221	abhydrolase domain containing 5 [Source:RGD Symbol;Acc:1303237]	125.452	0.630194	0.504282	1.24969	0.211414	0.455644	-0.512706	0.504104	-1.01707	0.309122	0.509605	-0.000563927	0.50468	-0.0011174	0.999108	1	0.118051	0.504505	0.233995	0.814989	0.936346	-2.12909	0.503242	-4.23076	2.32907e-05	0.000141366	-1.65843	0.502902	-3.29771	0.000974751	0.00503822	-2.11985	0.503397	-4.21108	2.54151e-05	0.000154097	-2.34678	0.503376	-4.66208	3.13033e-06	2.71491e-05	-0.0576854	0.502745	-0.114741	0.908651	1	0.0416938
Abhd6	ENSRNOG00000008167	abhydrolase domain containing 6 [Source:RGD Symbol;Acc:1359323]	2611.6	-0.204489	0.252181	-0.810883	0.417433	0.673383	0.0720967	0.252215	0.285855	0.774989	0.882403	-0.103073	0.252018	-0.408989	0.682548	0.846628	-0.0293194	0.252052	-0.116323	0.907397	0.97822	-1.15563	0.251407	-4.59667	4.29288e-06	2.93132e-05	-0.768676	0.251654	-3.0545	0.00225438	0.0103525	-1.0033	0.251452	-3.99001	6.60696e-05	0.000367772	-0.773533	0.251387	-3.07706	0.00209055	0.00975968	-0.209243	0.251546	-0.831827	0.405507	1	-0.458832
Abhd8	ENSRNOG00000000054	abhydrolase domain containing 8 [Source:RGD Symbol;Acc:1305693]	23005.5	0.224358	0.0663139	3.38327	0.000716286	0.00616922	-0.145062	0.0662694	-2.18897	0.0285988	0.0899319	0.368176	0.0662529	5.55712	2.74259e-08	7.66036e-07	-0.28888	0.0662084	-4.36319	1.2818e-05	0.00023623	0.035301	0.0661871	0.533351	0.593791	0.742771	0.480851	0.0662344	7.25984	3.87548e-13	8.49925e-12	0.311602	0.0661484	4.71066	2.46921e-06	1.76538e-05	0.0908543	0.0662214	1.37198	0.17007	0.337462	-0.165639	0.066125	-2.50493	0.0122475	0.808335	-0.300487
Abi1	ENSRNOG00000031325	abl-interactor 1 [Source:RGD Symbol;Acc:621008]	5228.03	-0.276646	0.18034	-1.53402	0.125025	0.331432	0.308616	0.180296	1.71172	0.0869487	0.20904	-0.465371	0.180375	-2.58002	0.00987939	0.0497492	0.497341	0.180331	2.75794	0.00581666	0.0367016	-0.0595958	0.179961	-0.331159	0.740524	0.850122	-0.461458	0.180107	-2.56213	0.0104033	0.0377083	-0.627913	0.1802	-3.48454	0.000492993	0.00226643	-0.147631	0.179947	-0.820415	0.411979	0.612084	0.0371749	0.180084	0.206431	0.836454	1	0.0932293
Abi2	ENSRNOG00000017707	abl-interactor 2 [Source:RGD Symbol;Acc:628771]	9412.65	0.0554553	0.137903	0.402134	0.687585	0.856118	-0.137135	0.137902	-0.99444	0.320009	0.521482	0.295817	0.137785	2.14694	0.031798	0.119376	-0.377497	0.137785	-2.73975	0.00614851	0.0383146	-0.540945	0.137646	-3.92998	8.49547e-05	0.000464906	-0.396076	0.13763	-2.87784	0.0040041	0.0168026	-0.115527	0.137561	-0.839818	0.401011	0.581484	-0.561051	0.137596	-4.07751	4.55197e-05	0.000319958	-0.109518	0.137304	-0.797635	0.425082	1	-0.00773354
Abi3	ENSRNOG00000005575	ABI family, member 3 [Source:RGD Symbol;Acc:1311794]	471.942	-0.0718011	0.474177	-0.151423	0.879642	0.950698	0.497014	0.473999	1.04856	0.294383	0.493281	0.173344	0.474033	0.365679	0.714604	0.866841	0.251868	0.473855	0.53153	0.595051	0.81331	-0.249775	0.473617	-0.527377	0.597932	0.746236	-0.509815	0.473876	-1.07584	0.281999	0.487432	-0.324568	0.473764	-0.685083	0.493291	0.665469	-0.587301	0.473778	-1.23961	0.215118	0.397233	-0.148998	0.473741	-0.314514	0.75313	1	-0.236523
Abl1	ENSRNOG00000009371	ABL proto-oncogene 1, non-receptor tyrosine kinase [Source:RGD Symbol;Acc:1584969]	1158.37	-0.259565	0.277684	-0.934748	0.349918	0.608149	0.188738	0.277675	0.679708	0.49669	0.689137	-0.115642	0.277455	-0.416796	0.676828	0.842699	0.0448152	0.277446	0.161528	0.871678	0.960982	0.616807	0.277564	2.22221	0.026269	0.0724415	0.129374	0.277558	0.466115	0.641133	0.796219	0.435388	0.277616	1.56831	0.116809	0.239233	0.321328	0.277172	1.15931	0.24633	0.437904	-0.0674804	0.279596	-0.241349	0.809284	1	0.298111
Abl2	ENSRNOG00000004305	ABL proto-oncogene 2, non-receptor tyrosine kinase [Source:RGD Symbol;Acc:1590898]	359.029	0.701378	0.442182	1.58618	0.1127	0.30739	-0.372426	0.441871	-0.842839	0.399318	0.600794	0.414123	0.442279	0.936339	0.349099	0.589761	-0.0851703	0.441967	-0.192707	0.847188	0.951867	0.497831	0.442067	1.12615	0.260104	0.430043	0.773659	0.441822	1.75107	0.0799344	0.196852	0.183681	0.441858	0.4157	0.677629	0.807846	-0.0629446	0.44213	-0.142367	0.88679	0.94324	-0.134534	0.443533	-0.303324	0.761643	1	0.0960852
Ablim2	ENSRNOG00000007882	actin binding LIM protein family, member 2 [Source:RGD Symbol;Acc:1303094]	3749.25	-0.202718	0.162257	-1.24936	0.211533	0.455815	-0.439982	0.162657	-2.70496	0.00683116	0.0279586	-0.598111	0.162465	-3.68149	0.000231876	0.00234658	-0.0445882	0.162864	-0.273775	0.784257	0.921036	-0.457539	0.162336	-2.81847	0.00482533	0.0171808	-0.349688	0.161929	-2.15952	0.03081	0.0924538	-0.431102	0.16236	-2.65523	0.00792555	0.0260639	-0.397338	0.161658	-2.4579	0.0139753	0.0491713	-0.250232	0.162849	-1.53659	0.124395	1	0.331949
Ablim3	ENSRNOG00000019365	actin binding LIM protein family, member 3 [Source:RGD Symbol;Acc:1565118]	561.332	0.126732	0.354817	0.357176	0.72096	0.873947	-1.27048	0.357005	-3.5587	0.000372689	0.00232012	-0.452482	0.355526	-1.27271	0.203121	0.422617	-0.691262	0.357708	-1.93247	0.0533011	0.183697	-1.5986	0.356141	-4.48866	7.16721e-06	4.69575e-05	-0.522689	0.353651	-1.47798	0.139413	0.298807	-1.23339	0.354409	-3.48014	0.000501152	0.00229806	-0.829962	0.353607	-2.34713	0.0189185	0.0632125	-0.179912	0.355703	-0.505794	0.613001	1	0.193868
Abo	ENSRNOG00000046958	ABO blood group (transferase A, alpha 1-3-N-acetylgalactosaminyltransferase; transferase B, alpha 1-3-galactosyltransferase) [Source:RGD Symbol;Acc:2307241]	145.294	0.510335	0.504183	1.0122	0.311442	0.571268	-0.648499	0.504175	-1.28626	0.198353	0.378143	-0.0417626	0.504129	-0.082841	0.933978	0.983509	-0.0964015	0.504121	-0.191227	0.848348	0.952008	-0.204957	0.504186	-0.406512	0.684367	0.810752	0.734312	0.504228	1.45631	0.145307	0.307686	-0.206598	0.504195	-0.409758	0.681984	0.811421	-0.234191	0.504225	-0.464458	0.64232	0.792802	-0.455459	0.503658	-0.904301	0.365836	1	-0.288942
Abo2	ENSRNOG00000045801	histo-blood group ABO system transferase 2 [Source:RGD Symbol;Acc:1311152]	0.0923861	0	0.137628	0	1	NA	0	0.137628	0	1	NA	0	0.137628	0	1	NA	0	0.137628	0	1	NA	0	0.139563	0	1	NA	0	0.139843	0	1	NA	0	0.138154	0	1	NA	-0.199191	0.142567	-1.39718	0.16236	NA	-0.0731436	0.163848	-0.44641	0.655301	1	0
Abr	ENSRNOG00000056837	active BCR-related [Source:RGD Symbol;Acc:1306279]	24061.5	1.43583	0.130281	11.021	3.0252e-28	1.08293e-25	-1.47485	0.130274	-11.3211	1.03188e-29	7.76631e-28	0.93021	0.130306	7.13868	9.42338e-13	5.77768e-11	-0.969226	0.130299	-7.43847	1.01862e-13	1.24301e-11	0.541275	0.130417	4.15035	3.31973e-05	0.000195135	2.13663	0.130303	16.3974	1.99531e-60	7.55194e-58	1.44574	0.13033	11.0929	1.35848e-28	5.23766e-27	0.58351	0.130396	4.4749	7.64476e-06	6.18793e-05	-0.117327	0.129107	-0.908758	0.363478	1	-0.120547
Abra	ENSRNOG00000007999	actin-binding Rho activating protein [Source:RGD Symbol;Acc:708493]	18.0036	0.157731	0.323593	0.487435	0.62595	NA	0.577861	0.32424	1.7822	0.0747161	0.187222	0.0158398	0.323573	0.0489529	0.960957	0.994358	0.719752	0.32422	2.21995	0.026422	0.11133	0.597834	0.324659	1.84142	0.0655596	0.152353	-0.032213	0.324199	-0.0993619	0.920851	NA	-0.0929107	0.323985	-0.286775	0.774285	0.877071	-0.147139	0.324133	-0.453947	0.649867	NA	0.0395173	0.31478	0.125539	0.900097	1	0.0481627
Abracl	ENSRNOG00000051450	ABRA C-terminal like [Source:RGD Symbol;Acc:1583256]	1950.74	-0.746195	0.194933	-3.82796	0.000129209	0.00137939	1.37974	0.19444	7.09596	1.28456e-12	2.7982e-11	-0.0182218	0.193977	-0.0939377	0.925159	0.979785	0.651763	0.193482	3.3686	0.000755501	0.00723221	0.955253	0.193381	4.93974	7.82263e-07	6.04704e-06	-0.477539	0.194702	-2.45266	0.0141804	0.0492389	0.454472	0.194082	2.34165	0.0191989	0.0556401	0.514412	0.193881	2.65324	0.00797236	0.0307429	0.245444	0.196476	1.24924	0.211579	1	0.0529889
Abt1	ENSRNOG00000017585	activator of basal transcription 1 [Source:RGD Symbol;Acc:1310785]	2349.83	-0.994229	0.180375	-5.51201	3.54759e-08	9.01056e-07	0.918124	0.180371	5.09019	3.57702e-07	4.13231e-06	-0.452677	0.17976	-2.51824	0.0117944	0.0573035	0.376573	0.179756	2.09491	0.036179	0.139062	0.881044	0.179813	4.89979	9.59371e-07	7.31491e-06	0.0552924	0.180707	0.305978	0.759622	0.871652	0.682387	0.180349	3.7837	0.000154516	0.000799223	1.01578	0.179721	5.65201	1.58578e-08	1.84399e-07	-0.0337024	0.182543	-0.184627	0.853522	1	-0.0922792
Abtb1	ENSRNOG00000015762	ankyrin repeat and BTB (POZ) domain containing 1 [Source:RGD Symbol;Acc:1359363]	1358.65	0.0177389	0.242056	0.0732842	0.94158	0.973975	-0.126455	0.242079	-0.52237	0.601413	0.768539	-0.110536	0.242063	-0.456641	0.647929	0.826446	0.00181992	0.242086	0.00751763	0.994002	1	0.18939	0.241885	0.782975	0.433642	0.607897	0.478488	0.24197	1.97747	0.0479886	0.132732	0.173269	0.241999	0.715991	0.473997	0.648277	0.29781	0.241727	1.23201	0.217945	0.400543	-0.162651	0.24452	-0.665183	0.505934	1	-0.162354
Abtb2	ENSRNOG00000008510	ankyrin repeat and BTB (POZ) domain containing 2 [Source:RGD Symbol;Acc:620724]	387.659	-0.517433	0.479878	-1.07826	0.280918	0.539918	-0.380014	0.480114	-0.791507	0.428648	0.628008	-0.178169	0.479754	-0.371375	0.710358	0.864908	-0.719278	0.47999	-1.49853	0.133997	0.337516	-0.0612197	0.480047	-0.127529	0.898522	0.945938	0.734626	0.480069	1.53025	0.125955	0.277315	1.31213	0.480124	2.7329	0.00627788	0.0213146	1.20419	0.479862	2.50946	0.0120916	0.0435255	-0.0476946	0.480421	-0.0992765	0.920919	1	-0.414478
Ac1576	ENSRNOG00000058372	uncharacterized LOC102552783 [Source:RGD Symbol;Acc:7502825]	139.795	0.0675735	0.442426	0.152734	0.878608	0.950463	0.38081	0.441662	0.86222	0.388567	0.591155	0.188351	0.442057	0.426078	0.670051	0.839836	0.260033	0.441291	0.589255	0.555691	0.786679	1.17628	0.442105	2.66063	0.00779942	0.0261135	0.676494	0.44251	1.52877	0.126323	0.277867	0.928954	0.4428	2.09791	0.0359132	0.0935722	0.948709	0.442932	2.14188	0.0322028	0.0961284	0.334087	0.448527	0.744854	0.45636	1	0.117073
Acaa1a	NA	NA	1698.82	0.0188569	0.238655	0.0790133	0.937022	0.972421	0.312777	0.238406	1.31195	0.189537	0.366061	-0.150218	0.238689	-0.629348	0.529121	0.740986	0.481853	0.238441	2.02085	0.0432953	0.158715	0.979906	0.238491	4.10878	3.97762e-05	0.000231044	0.88616	0.23889	3.70949	0.000207675	0.00128177	0.440783	0.238863	1.84534	0.0649885	0.150959	0.789315	0.238704	3.30666	0.000944142	0.00486322	-0.0778801	0.241082	-0.323045	0.746662	1	-0.218737
Acaa1b	NA	NA	86.0027	-0.241688	0.484605	-0.498733	0.617968	0.815814	0.412994	0.484355	0.852668	0.393844	0.595909	-0.43624	0.484701	-0.900019	0.36811	0.607038	0.607545	0.484451	1.25409	0.209809	0.450224	0.647538	0.483993	1.33791	0.180926	0.330474	0.561362	0.484884	1.15772	0.246976	0.446317	0.0100633	0.484798	0.0207577	0.983439	0.995817	0.75894	0.484345	1.56694	0.117128	0.25873	-0.0430949	0.488063	-0.0882978	0.92964	1	-0.31973
Acaa2	ENSRNOG00000013766	acetyl-CoA acyltransferase 2 [Source:RGD Symbol;Acc:620482]	759.356	0.202925	0.403368	0.503078	0.614909	0.813558	-1.84478	0.404561	-4.55997	5.11613e-06	4.81322e-05	-0.548826	0.403667	-1.3596	0.173957	0.381743	-1.09303	0.404859	-2.69979	0.00693839	0.0420485	-1.14256	0.404621	-2.82378	0.00474608	0.0169379	0.58754	0.403297	1.45684	0.14516	0.307429	0.089462	0.4038	0.22155	0.824664	0.910186	0.327621	0.403295	0.812361	0.416585	0.616258	-0.0568937	0.404113	-0.140786	0.888039	1	0.114473
Acaca	ENSRNOG00000034013	acetyl-CoA carboxylase alpha [Source:RGD Symbol;Acc:621248]	1286.42	1.30451	0.289403	4.5076	6.5565e-06	9.94765e-05	-2.19971	0.290106	-7.58244	3.39117e-14	8.64578e-13	0.376669	0.289691	1.30024	0.193518	0.411075	-1.27187	0.290394	-4.37981	1.18785e-05	0.000220533	1.35239	0.292767	4.61933	3.84977e-06	2.65084e-05	3.79227	0.291988	12.9878	1.43566e-38	1.77312e-36	3.04176	0.293312	10.3704	3.38115e-25	1.10671e-23	2.72387	0.292736	9.30487	1.34153e-20	4.30867e-19	0.235647	0.297176	0.792956	0.427803	1	-0.239709
Acacb	ENSRNOG00000000658	acetyl-CoA carboxylase beta [Source:RGD Symbol;Acc:620500]	48.0963	0.290278	0.454368	0.63886	0.522914	0.753646	-1.07632	0.453795	-2.37182	0.0177007	0.0611882	-0.686766	0.453752	-1.51353	0.130146	0.317016	-0.0992754	0.453178	-0.219065	0.826599	0.942659	-0.369814	0.453707	-0.815093	0.415019	0.591009	0.565007	0.454533	1.24305	0.21385	0.405917	-0.422571	0.453809	-0.931165	0.351768	0.53424	0.26625	0.454458	0.585862	0.557968	0.729975	-0.00836053	0.452451	-0.0184783	0.985257	1	0.139375
Acad10	ENSRNOG00000037815	acyl-CoA dehydrogenase family, member 10 [Source:RGD Symbol;Acc:1310159]	438.619	0.598676	0.431166	1.3885	0.164983	0.395291	-0.209559	0.430869	-0.486363	0.626709	0.788027	0.545122	0.431133	1.26439	0.206089	0.426112	-0.156005	0.430837	-0.362098	0.717279	0.888537	0.875097	0.43119	2.02949	0.0424082	0.107494	1.07626	0.431107	2.49651	0.0125421	0.0444046	1.03036	0.431231	2.38935	0.0168782	0.0499277	0.507404	0.431374	1.17625	0.239494	0.429118	0.0296843	0.432875	0.0685746	0.945328	1	0.00835777
Acad11	ENSRNOG00000010940	acyl-CoA dehydrogenase family, member 11 [Source:RGD Symbol;Acc:1306270]	187.431	1.3898	0.498491	2.78801	0.00530334	0.0311976	0.271417	0.497712	0.54533	0.585526	0.757022	0.45572	0.498819	0.913599	0.360928	0.600628	1.20549	0.498044	2.42046	0.0155011	0.0758991	0.25153	0.497565	0.505522	0.613193	0.756322	0.137156	0.497695	0.275583	0.782869	0.886878	-0.705208	0.498102	-1.41579	0.156837	0.299998	-1.45312	0.498301	-2.91615	0.0035438	0.0154793	-0.199211	0.498067	-0.399968	0.68918	1	-0.156042
Acad9	ENSRNOG00000014178	acyl-CoA dehydrogenase family, member 9 [Source:RGD Symbol;Acc:727973]	2134.05	0.573499	0.204128	2.80951	0.00496174	0.029587	-0.140654	0.203725	-0.690413	0.489935	0.683069	0.193824	0.204308	0.948686	0.342781	0.582848	0.239021	0.203905	1.17221	0.241111	0.49152	0.34196	0.203683	1.67889	0.0931742	0.200717	0.901507	0.203928	4.4207	9.83796e-06	7.97711e-05	0.0515407	0.203916	0.252755	0.800458	0.893544	-0.00620366	0.204026	-0.0304063	0.975743	0.987416	-0.333851	0.206036	-1.62036	0.105156	1	-0.418444
Acadl	ENSRNOG00000012966	acyl-CoA dehydrogenase, long chain [Source:RGD Symbol;Acc:2011]	1298.24	0.831827	0.211785	3.92769	8.57641e-05	0.000962221	-0.869392	0.211726	-4.10622	4.02184e-05	0.000312233	0.282907	0.212166	1.33343	0.182392	0.395052	-0.320473	0.212106	-1.5109	0.130813	0.332832	0.292278	0.212307	1.37668	0.168612	0.313812	1.26316	0.21162	5.96899	2.38731e-09	3.40758e-08	0.441869	0.211918	2.08509	0.0370611	0.0961311	0.291001	0.212122	1.37186	0.170108	0.337462	-0.140045	0.215967	-0.648454	0.516691	1	-0.101289
Acadm	ENSRNOG00000009845	acyl-CoA dehydrogenase, C-4 to C-12 straight chain [Source:RGD Symbol;Acc:2012]	1346.6	0.49824	0.325148	1.53235	0.125437	0.331849	-0.323399	0.325003	-0.995064	0.319705	0.521258	0.11604	0.325276	0.356744	0.721283	0.870624	0.0588004	0.32513	0.180852	0.856484	0.95478	0.28182	0.325028	0.867063	0.385907	0.562389	0.490316	0.324859	1.50932	0.131217	0.285847	0.237768	0.325142	0.731277	0.46461	0.640246	0.252726	0.325154	0.777249	0.437012	0.63452	0.260348	0.325879	0.798909	0.424343	1	0.114772
Acads	ENSRNOG00000001177	acyl-CoA dehydrogenase, C-2 to C-3 short chain [Source:RGD Symbol;Acc:620514]	942.225	0.199657	0.316365	0.631095	0.527979	0.755437	-0.911394	0.316914	-2.87584	0.00402956	0.017884	-0.0181828	0.316428	-0.0574629	0.954176	0.99243	-0.693555	0.316976	-2.18803	0.0286672	0.118253	-0.0378164	0.317138	-0.119243	0.905083	0.949989	1.0473	0.316587	3.30811	0.000939276	0.00488066	0.766371	0.316774	2.4193	0.0155504	0.0466141	0.587857	0.316397	1.85798	0.0631725	0.162909	-0.259189	0.318915	-0.812722	0.416377	1	-0.173321
Acadsb	ENSRNOG00000020624	acyl-CoA dehydrogenase, short/branched chain [Source:RGD Symbol;Acc:2013]	228.283	-0.263772	0.449227	-0.58717	0.55709	0.775296	-1.25291	0.451975	-2.77209	0.00556985	0.0234767	-2.31861	0.454559	-5.1008	3.38226e-07	7.57784e-06	0.801926	0.457226	1.75389	0.0794488	0.241273	-1.96027	0.450796	-4.34847	1.37091e-05	8.61007e-05	-0.547926	0.448478	-1.22175	0.221804	0.415657	-2.82191	0.453822	-6.21809	5.03234e-10	5.66769e-09	-0.618666	0.447834	-1.38146	0.167137	0.333718	-0.332313	0.450086	-0.738334	0.460311	1	-0.158354
Acadvl	ENSRNOG00000018114	acyl-CoA dehydrogenase, very long chain [Source:RGD Symbol;Acc:2014]	1913.67	0.47062	0.237881	1.97838	0.0478859	0.16821	-0.627782	0.237933	-2.63849	0.00832771	0.0330609	-0.447649	0.238407	-1.87767	0.0604266	0.189638	0.290487	0.238458	1.21819	0.223153	0.46774	-0.0854464	0.237929	-0.359126	0.719501	0.835622	0.729665	0.237698	3.06972	0.00214263	0.00989742	0.037849	0.238497	0.158698	0.873907	0.939136	0.440334	0.237972	1.85036	0.0642617	0.164797	0.181091	0.239576	0.755882	0.44972	1	-0.187129
Acan	ENSRNOG00000028992	aggrecan [Source:RGD Symbol;Acc:68358]	47.7182	0.328059	0.444568	0.737929	0.460558	0.70948	-0.513969	0.444478	-1.15634	0.247541	0.439312	0.307026	0.444633	0.690517	0.489869	0.711976	-0.492936	0.444543	-1.10886	0.267491	0.521027	-0.765026	0.444896	-1.71956	0.0855121	0.187844	0.271213	0.444988	0.609484	0.542204	0.729132	-0.153558	0.445156	-0.344954	0.730129	0.845104	-0.317774	0.444956	-0.714171	0.475122	0.666994	-0.257453	0.44334	-0.580713	0.561434	1	-0.516087
Acap1	ENSRNOG00000015674	ArfGAP with coiled-coil, ankyrin repeat and PH domains 1 [Source:RGD Symbol;Acc:1305360]	7.09513	0	0.22149	0	1	NA	0	0.22156	0	1	NA	0	0.221593	0	1	NA	0	0.221664	0	1	NA	-0.00608908	0.221974	-0.0274314	0.978116	NA	-0.0467769	0.221928	-0.210776	0.833062	NA	-0.556567	0.222192	-2.50489	0.012249	NA	0	0.222009	0	1	NA	0.0249604	0.174834	0.142767	0.886475	1	0.0214975
Acap2	ENSRNOG00000001730	ArfGAP with coiled-coil, ankyrin repeat and PH domains 2 [Source:RGD Symbol;Acc:1562939]	733.928	-0.168809	0.329083	-0.512969	0.607973	0.809759	1.06846	0.328331	3.25422	0.00113704	0.00609966	-0.0474994	0.328815	-0.144456	0.88514	0.961068	0.94715	0.328062	2.88711	0.00388804	0.0268657	1.09154	0.327798	3.32993	0.000868675	0.00378882	0.211979	0.328905	0.644498	0.519253	0.710897	0.244013	0.328747	0.742252	0.457935	0.634806	0.509137	0.328665	1.54911	0.121355	0.265475	0.127943	0.331386	0.386086	0.699433	1	-0.188311
Acap3	ENSRNOG00000022307	ArfGAP with coiled-coil, ankyrin repeat and PH domains 3 [Source:RGD Symbol;Acc:1310711]	3437.35	0.849163	0.213268	3.98167	6.84329e-05	0.000788631	0.306599	0.212526	1.44264	0.149121	0.307868	1.23727	0.213052	5.80737	6.34603e-09	2.09903e-07	-0.0815114	0.212309	-0.383927	0.701032	0.87893	0.389294	0.212324	1.83349	0.06673	0.154459	0.178918	0.212529	0.84185	0.399872	0.612039	0.104201	0.212221	0.491001	0.623426	0.765817	-0.843384	0.212979	-3.95994	7.49673e-05	0.000504203	-0.173068	0.212965	-0.81266	0.416413	1	-0.0961836
Acat1	ENSRNOG00000007862	acetyl-CoA acetyltransferase 1 [Source:RGD Symbol;Acc:2016]	3983.05	0.150415	0.146608	1.02597	0.304906	0.565436	0.414613	0.146238	2.83519	0.0045799	0.0199324	0.33994	0.146427	2.32156	0.0202564	0.0854087	0.225089	0.146057	1.5411	0.123292	0.320798	0.584268	0.146021	4.00126	6.30067e-05	0.000352809	0.527514	0.146486	3.60112	0.000316855	0.00187382	0.400667	0.146237	2.73985	0.00614673	0.0209145	0.333224	0.146457	2.27524	0.0228917	0.0733464	-0.04385	0.148028	-0.296227	0.767056	1	-0.357664
Acat2	ENSRNOG00000019189	acetyl-CoA acetyltransferase 2 [Source:RGD Symbol;Acc:1359366]	1716.01	-0.236454	0.201624	-1.17275	0.240896	0.493648	0.242402	0.201508	1.20294	0.229	0.417207	-0.767043	0.202384	-3.79004	0.000150625	0.00164164	0.77299	0.202269	3.8216	0.000132589	0.00176163	-0.761264	0.199968	-3.80693	0.0001407	0.000734952	-0.887301	0.200517	-4.42506	9.64162e-06	7.83415e-05	-1.55318	0.201323	-7.71489	1.21084e-14	2.09053e-13	-0.804946	0.199968	-4.02537	5.68861e-05	0.000392849	-0.153882	0.202025	-0.761699	0.44624	1	-0.1162
Acbd3	ENSRNOG00000003185	acyl-CoA binding domain containing 3 [Source:RGD Symbol;Acc:727851]	2158.91	-0.296485	0.220848	-1.34248	0.17944	0.413412	0.431383	0.220753	1.95414	0.0506843	0.139796	0.158547	0.220569	0.71881	0.472258	0.697429	-0.0236488	0.220473	-0.107264	0.91458	0.980947	2.12882	0.221781	9.59874	8.09278e-22	1.96967e-20	1.66577	0.22196	7.50485	6.15006e-14	1.47866e-12	2.17926	0.222035	9.81494	9.70974e-23	2.84479e-21	2.03947	0.2217	9.19924	3.60499e-20	1.12184e-18	0.0771325	0.224579	0.343454	0.731257	1	0.0316287
Acbd4	ENSRNOG00000003108	acyl-CoA binding domain containing 4 [Source:RGD Symbol;Acc:1308404]	2152.11	-0.231254	0.277399	-0.833653	0.404477	0.66256	0.0828011	0.277438	0.298449	0.765361	0.876329	-0.00740863	0.277182	-0.0267284	0.978676	1	-0.141044	0.277222	-0.508778	0.610908	0.823785	-0.606828	0.27685	-2.19191	0.0283862	0.0773946	-0.701918	0.276962	-2.53435	0.0112655	0.0405207	-0.494114	0.276803	-1.78508	0.0742491	0.167637	-0.432236	0.276764	-1.56175	0.118347	0.260649	0.0384055	0.27703	0.138633	0.88974	1	0.0122814
Acbd5	ENSRNOG00000017642	acyl-CoA binding domain containing 5 [Source:RGD Symbol;Acc:1309411]	728.094	0.268032	0.393002	0.682011	0.495232	0.735305	-0.263834	0.392937	-0.671439	0.501941	0.693514	0.527198	0.392785	1.34221	0.179529	0.3906	-0.523	0.39272	-1.33174	0.182946	0.413124	-0.184561	0.392675	-0.47001	0.638348	0.775355	-0.0833191	0.39248	-0.212289	0.831882	0.915101	0.0552021	0.392297	0.140715	0.888095	0.947015	-0.279912	0.392621	-0.712934	0.475887	0.667781	0.0712832	0.39336	0.181216	0.856198	1	0.162232
Acbd6	ENSRNOG00000003550	acyl-CoA binding domain containing 6 [Source:RGD Symbol;Acc:1305030]	2900.69	-0.873418	0.143528	-6.08536	1.16229e-09	3.95075e-08	1.10071	0.143326	7.67981	1.59324e-14	4.12046e-13	-0.793792	0.143276	-5.5403	3.01949e-08	8.35574e-07	1.02109	0.143074	7.13681	9.55249e-13	1.0175e-10	0.761166	0.142427	5.34424	9.07993e-08	8.07744e-07	-0.446638	0.143435	-3.11387	0.00184654	0.00870447	-0.237501	0.14343	-1.65586	0.0977494	0.208416	0.592827	0.14254	4.15902	3.19619e-05	0.000232683	0.165905	0.145297	1.14184	0.253521	1	0.106991
Acbd7	ENSRNOG00000016480	acyl-CoA binding domain containing 7 [Source:RGD Symbol;Acc:1564164]	33.1127	0.557739	0.405813	1.37437	0.169326	NA	-0.156938	0.406214	-0.386344	0.699242	0.835753	-0.140623	0.405335	-0.346931	0.728643	0.874887	0.541424	0.405735	1.33443	0.182064	0.41151	0.315842	0.406264	0.777431	0.436905	0.610484	0.230565	0.40646	0.567252	0.570543	0.750322	-0.431513	0.405844	-1.06325	0.28767	0.463435	-0.215738	0.406048	-0.531312	0.595202	0.760188	0.105505	0.398107	0.265018	0.790996	1	0.228388
Accs	ENSRNOG00000009199	1-aminocyclopropane-1-carboxylate synthase homolog (Arabidopsis)(non-functional) [Source:RGD Symbol;Acc:1309314]	161.535	1.39013	0.50785	2.73729	0.00619474	0.0351639	-1.12759	0.507845	-2.22033	0.0263961	0.0843132	0.88192	0.507855	1.73656	0.0824651	0.23445	-0.619372	0.50785	-1.2196	0.222618	0.466814	-0.234099	0.507849	-0.460962	0.644826	0.779797	0.760889	0.507834	1.4983	0.134054	0.289767	0.279845	0.507841	0.551049	0.5816	0.73587	-0.738031	0.507849	-1.45325	0.146155	0.302937	-0.108139	0.507551	-0.21306	0.831281	1	0.131742
Accsl	ENSRNOG00000042533	1-aminocyclopropane-1-carboxylate synthase homolog (Arabidopsis)(non-functional)-like [Source:RGD Symbol;Acc:1596039]	1.08032	0	0.167318	0	1	NA	0	0.167479	0	1	NA	0	0.167552	0	1	NA	0	0.167712	0	1	NA	-0.0831644	0.168532	-0.493464	0.621684	NA	0	0.168256	0	1	NA	0	0.168188	0	1	NA	-0.250595	0.168801	-1.48456	0.13766	NA	-0.251287	0.169536	-1.4822	0.138286	1	-0.0838763
Acd	ENSRNOG00000038973	adrenocortical dysplasia homolog (mouse) [Source:RGD Symbol;Acc:1565053]	1840.57	-0.189349	0.22319	-0.848377	0.396228	0.654193	-0.0221071	0.223313	-0.0989958	0.921142	0.966188	-0.464436	0.223364	-2.07928	0.0375914	0.135694	0.25298	0.223488	1.13197	0.257649	0.510612	-0.632129	0.22246	-2.84154	0.00448964	0.016154	-0.561357	0.222555	-2.52233	0.011658	0.04172	-0.897377	0.222802	-4.02768	5.63291e-05	0.000318345	-0.293632	0.222307	-1.32084	0.186554	0.36004	0.0782814	0.223964	0.349526	0.726694	1	-0.048608
Ace	NA	NA	136.755	-0.0746569	0.500717	-0.1491	0.881475	0.950891	-1.03157	0.501448	-2.05718	0.0396693	0.115847	-1.63015	0.501939	-3.24771	0.00116338	0.00906545	0.52393	0.502647	1.04234	0.297253	0.554411	-1.32535	0.50109	-2.64494	0.00817043	0.0271854	-0.540378	0.500322	-1.08006	0.280115	0.485464	-1.78715	0.501716	-3.56207	0.000367937	0.00174711	-1.53516	0.500039	-3.07008	0.00214004	0.00994819	-1.05994	0.500777	-2.11659	0.034295	1	0.243657
Ace2	ENSRNOG00000031665	angiotensin I converting enzyme 2 [Source:RGD Symbol;Acc:728890]	4.02943	0	0.171789	0	1	NA	0	0.171833	0	1	NA	0	0.171854	0	1	NA	0	0.171898	0	1	NA	-0.105264	0.17213	-0.611537	0.540844	NA	-0.0929053	0.17208	-0.539896	0.589269	NA	0	0.172029	0	1	NA	-0.152687	0.172164	-0.886873	0.375147	NA	-0.0596996	0.172249	-0.346589	0.7289	1	-0.0122813
Acer1	ENSRNOG00000047368	alkaline ceramidase 1 [Source:RGD Symbol;Acc:1588582]	8.73057	-0.133523	0.229004	-0.583058	0.559854	NA	0	0.228975	0	1	NA	-0.133637	0.229075	-0.583376	0.55964	NA	0	0.229047	0	1	NA	-0.111114	0.229304	-0.484569	0.627982	NA	-0.134967	0.229263	-0.588699	0.556063	NA	-0.0889185	0.229232	-0.387897	0.698092	NA	-0.0529372	0.229428	-0.230735	0.817521	NA	-0.0416549	0.206345	-0.201871	0.840018	1	0.0192069
Acer2	ENSRNOG00000007637	alkaline ceramidase 2 [Source:RGD Symbol;Acc:1304629]	118.201	0.631969	0.507849	1.2444	0.213352	0.458268	0.671489	0.507867	1.32217	0.18611	0.361325	0.764024	0.507852	1.50442	0.132473	0.321005	0.539434	0.50787	1.06215	0.288168	0.544175	1.02218	0.507869	2.01269	0.0441471	0.110941	0.213952	0.507865	0.421277	0.673553	0.818243	0.286481	0.507867	0.564086	0.572696	0.728271	-0.577819	0.507855	-1.13776	0.255219	0.448266	-0.158294	0.507523	-0.311896	0.755119	1	0.135317
Ache	ENSRNOG00000050841	acetylcholinesterase [Source:RGD Symbol;Acc:69313]	3473.6	-0.264484	0.17911	-1.47666	0.139767	0.355943	-1.41882	0.180268	-7.87064	3.52842e-15	9.68311e-14	-2.08356	0.18067	-11.5324	9.05948e-31	3.07753e-28	0.400254	0.181818	2.2014	0.027708	0.115471	-0.468568	0.18049	-2.59609	0.0094292	0.0308066	-0.226998	0.178935	-1.26861	0.204581	0.39363	-0.625998	0.181317	-3.4525	0.000555421	0.00252025	-0.0600396	0.178744	-0.335896	0.736949	0.856364	-0.0974727	0.179911	-0.541781	0.587969	1	1.1766
Acin1	ENSRNOG00000013533	apoptotic chromatin condensation inducer 1 [Source:RGD Symbol;Acc:1311945]	4058.42	-0.422321	0.144187	-2.92898	0.00340074	0.0220087	0.482196	0.144121	3.34578	0.000820507	0.00461224	-0.190151	0.143979	-1.32069	0.186606	0.400931	0.250027	0.143913	1.73735	0.0823252	0.247011	1.11569	0.144178	7.73826	1.00783e-14	1.65384e-13	0.465157	0.144366	3.22207	0.00127267	0.00634064	0.777771	0.144349	5.38813	7.11965e-08	6.32416e-07	0.840194	0.143996	5.83484	5.38431e-09	6.54618e-08	-0.0472565	0.14587	-0.323963	0.745966	1	0.168246
Ackr2	ENSRNOG00000019472	atypical chemokine receptor 2 [Source:RGD Symbol;Acc:620323]	127.759	0.356917	0.506671	0.704435	0.481162	0.725415	0.695081	0.506798	1.37151	0.170215	0.339699	0.695936	0.506722	1.37341	0.169625	0.375753	0.356063	0.506848	0.702504	0.482365	0.726524	0.111756	0.506896	0.220472	0.825504	0.903014	0.0713944	0.506776	0.14088	0.887965	0.945782	-0.187425	0.506855	-0.36978	0.711546	0.831663	-0.784656	0.506772	-1.54834	0.12154	0.265733	-0.494676	0.506307	-0.977028	0.328555	1	-0.649168
Ackr3	ENSRNOG00000019622	atypical chemokine receptor 3 [Source:RGD Symbol;Acc:620601]	376.041	0.392643	0.423908	0.926246	0.354318	0.612078	0.30427	0.423053	0.719225	0.472002	0.666883	1.04265	0.423248	2.46346	0.0137604	0.0638208	-0.345741	0.42239	-0.818534	0.413052	0.6692	-0.15391	0.422247	-0.364503	0.715482	0.832579	0.135887	0.423022	0.321228	0.748037	0.86511	0.302318	0.422151	0.716138	0.473906	0.648223	-0.861121	0.423002	-2.03574	0.0417769	0.117744	-0.601322	0.424442	-1.41673	0.156561	1	-0.591075
Acly	ENSRNOG00000016924	ATP citrate lyase [Source:RGD Symbol;Acc:2018]	6292.76	0.532303	0.163853	3.24867	0.00115945	0.00914793	-0.377078	0.163773	-2.30244	0.0213105	0.0711236	0.208232	0.163908	1.27042	0.203935	0.424025	-0.0530069	0.163829	-0.32355	0.746278	0.902394	0.633394	0.163911	3.86425	0.000111429	0.000594952	0.782621	0.163752	4.77931	1.75896e-06	1.64184e-05	0.708164	0.163962	4.31907	1.56689e-05	9.87178e-05	0.459596	0.163923	2.80373	0.00505154	0.0209549	0.209251	0.164096	1.27518	0.202247	1	0.227822
Acmsd	ENSRNOG00000003884	aminocarboxymuconate semialdehyde decarboxylase [Source:RGD Symbol;Acc:620868]	1.04985	0	0.167206	0	1	NA	0	0.167369	0	1	NA	0.211046	0.167821	1.25757	0.208547	NA	-0.211217	0.167983	-1.25737	0.20862	NA	0	0.168322	0	1	NA	0	0.16816	0	1	NA	0.211728	0.168467	1.25679	0.208831	NA	-0.122866	0.168569	-0.728876	0.466078	NA	-0.123717	0.169321	-0.730665	0.464984	1	0
Acnat2	ENSRNOG00000051912	acyl-coenzyme A amino acid N-acyltransferase 2 [Source:RGD Symbol;Acc:1359532]	8.91965	0.322631	0.448342	0.719609	0.471766	NA	-0.242774	0.448935	-0.540778	0.588661	NA	0.331993	0.448734	0.739843	0.459395	NA	-0.252136	0.449327	-0.561141	0.574701	NA	0.136769	0.449443	0.304308	0.760893	NA	0.383975	0.449975	0.853325	0.393479	NA	0.4142	0.449702	0.921056	0.357021	NA	0.0357081	0.4494	0.0794573	0.936669	NA	-0.0243101	0.443824	-0.0547743	0.956318	1	-0.00417099
Aco1	ENSRNOG00000005849	aconitase 1, soluble [Source:RGD Symbol;Acc:2019]	1014.77	0.643132	0.405399	1.58642	0.112645	0.307372	-0.424822	0.405271	-1.04824	0.294527	0.49339	0.244527	0.405494	0.603036	0.546485	0.753391	-0.0262177	0.405365	-0.0646768	0.948431	0.993846	0.0609823	0.405252	0.15048	0.880386	0.933312	0.543471	0.405149	1.34141	0.179787	0.359582	0.0456753	0.405275	0.112702	0.910267	0.959823	-0.0920574	0.405345	-0.227109	0.820339	0.906107	0.00759748	0.405303	0.0187452	0.985044	1	-0.0576228
Aco2	ENSRNOG00000024128	aconitase 2, mitochondrial [Source:RGD Symbol;Acc:621360]	16177.7	0.501846	0.105303	4.76572	1.88178e-06	3.25125e-05	-0.772513	0.105355	-7.33247	2.25953e-13	5.31835e-12	0.122903	0.105356	1.16655	0.243391	0.472971	-0.39357	0.105408	-3.73379	0.000188619	0.00232655	-0.421115	0.105321	-3.99841	6.37696e-05	0.000356593	0.510583	0.105185	4.85416	1.20896e-06	1.15323e-05	0.0605322	0.105262	0.575064	0.565248	0.722394	-0.103331	0.105247	-0.981798	0.3262	0.528003	-0.112074	0.104809	-1.06932	0.284925	1	-0.159194
Acot1	ENSRNOG00000055221	acyl-CoA thioesterase 1 [Source:RGD Symbol;Acc:70894]	109.408	0.248476	0.505361	0.49168	0.622945	0.818096	-1.07339	0.505222	-2.12458	0.0336214	0.101431	-0.514036	0.505263	-1.01736	0.30898	0.547059	-0.310874	0.505124	-0.615441	0.538263	0.772964	-0.0601226	0.505156	-0.119018	0.905261	0.950095	0.226951	0.505427	0.449028	0.653411	0.804941	-0.106108	0.505256	-0.210008	0.833661	0.914414	0.273251	0.505385	0.54068	0.588728	0.755211	0.292324	0.504706	0.579197	0.562456	1	0.778349
Acot11	ENSRNOG00000007837	acyl-CoA thioesterase 11 [Source:RGD Symbol;Acc:2324815]	20.4245	0	0.329263	0	1	NA	0.00641111	0.329342	0.0194664	0.984469	0.997292	0.534243	0.329755	1.62012	0.105206	0.275382	-0.527762	0.329834	-1.60008	0.10958	0.297219	-0.329857	0.329962	-0.999684	0.317463	0.491877	-0.14399	0.329775	-0.436631	0.662379	NA	0.432316	0.330116	1.30959	0.190335	0.345826	-0.440809	0.330017	-1.33571	0.181643	NA	-0.261242	0.312463	-0.836073	0.403114	1	-0.16809
Acot12	ENSRNOG00000061414	acyl-CoA thioesterase 12 [Source:RGD Symbol;Acc:619752]	0.348856	0	0.156062	0	1	NA	0	0.156475	0	1	NA	0	0.156664	0	1	NA	0	0.157077	0	1	NA	0	0.158944	0	1	NA	-0.294148	0.159581	-1.84325	0.0652922	NA	0	0.158326	0	1	NA	0	0.159222	0	1	NA	0.245219	0.164607	1.48973	0.136296	1	0.242274
Acot13	ENSRNOG00000018415	acyl-CoA thioesterase 13 [Source:RGD Symbol;Acc:1306513]	2366.33	-0.421095	0.235089	-1.79122	0.0732587	0.228161	0.700681	0.234934	2.98247	0.00285937	0.0134202	-0.577196	0.235113	-2.45498	0.0140894	0.064963	0.856783	0.234957	3.64654	0.00026579	0.00309039	0.836529	0.234696	3.56431	0.000364813	0.00175221	0.0185958	0.235033	0.0791199	0.936937	0.972323	0.0781813	0.235273	0.332301	0.739662	0.851454	0.617475	0.234791	2.62989	0.00854115	0.0325481	0.177649	0.23597	0.752845	0.451543	1	0.117162
Acot2	ENSRNOG00000010134	acyl-CoA thioesterase 2 [Source:RGD Symbol;Acc:621055]	445.012	1.32634	0.286061	4.63655	3.54273e-06	5.74002e-05	-0.145489	0.282722	-0.514601	0.606832	0.772745	1.05291	0.286321	3.67738	0.000235642	0.00238085	0.127938	0.282985	0.4521	0.651197	0.849986	0.549771	0.282971	1.94285	0.0520343	0.126631	0.975219	0.283388	3.44128	0.000578965	0.00320273	0.589822	0.28385	2.07793	0.0377156	0.0974603	-0.465612	0.286267	-1.62649	0.103845	0.236248	-0.113792	0.291479	-0.390394	0.696245	1	-0.278251
Acot3	ENSRNOG00000053460	acyl-CoA thioesterase 3 [Source:RGD Symbol;Acc:1564089]	430.745	-0.264887	0.323904	-0.817796	0.413474	0.670085	0.287348	0.323747	0.887568	0.374773	0.577695	-0.546654	0.324224	-1.68604	0.0917884	0.250584	0.569114	0.324067	1.75616	0.079061	0.240913	0.464411	0.323128	1.43724	0.150651	0.289193	0.0592034	0.323567	0.182971	0.854821	0.929041	0.156959	0.324824	0.483213	0.628944	0.769812	0.131406	0.322668	0.407248	0.683826	0.821494	-0.191597	0.328267	-0.583661	0.559448	1	0.117169
Acot4	ENSRNOG00000046864	acyl-CoA thioesterase 4 [Source:RGD Symbol;Acc:1596753]	646.154	-0.320374	0.424668	-0.754412	0.450602	0.702446	0.179069	0.424696	0.421639	0.673288	0.819547	-0.661311	0.424811	-1.55672	0.119537	0.300133	0.520005	0.424839	1.224	0.220951	0.464558	-0.134629	0.424305	-0.317294	0.751021	0.856369	-0.289966	0.424457	-0.683144	0.494516	0.692243	-0.726436	0.424637	-1.71072	0.0871322	0.190166	0.0843917	0.424241	0.198924	0.842322	0.916982	0.0538726	0.424854	0.126803	0.899097	1	-0.0236837
Acot5	ENSRNOG00000032508	acyl-CoA thioesterase 5 [Source:RGD Symbol;Acc:1565917]	71.4703	0.86354	0.497534	1.73564	0.0826273	0.248685	-1.41122	0.497232	-2.83815	0.00453756	0.0197755	0.340932	0.497393	0.685438	0.493067	0.714101	-0.888612	0.497091	-1.78762	0.0738367	0.231347	-0.996588	0.497271	-2.00411	0.0450578	0.112883	0.388329	0.497935	0.779879	0.435462	0.643323	-0.0252426	0.497703	-0.0507183	0.95955	0.98458	-0.517544	0.497637	-1.04	0.298339	0.498143	-0.0418114	0.496597	-0.0841958	0.932901	1	0.0259661
Acot6	ENSRNOG00000029637	acyl-CoA thioesterase 6 [Source:RGD Symbol;Acc:1309669]	61.9947	-0.431911	0.492439	-0.877086	0.38044	0.637126	0.436797	0.492482	0.88693	0.375117	0.578012	-0.896566	0.492167	-1.82167	0.0685052	0.20748	0.901452	0.49221	1.83144	0.0670355	0.215161	-0.2154	0.493047	-0.436874	0.662203	0.793752	-0.518252	0.492702	-1.05186	0.292865	0.499611	-1.11864	0.492409	-2.27177	0.0231004	0.0651592	0.0776904	0.49297	0.157597	0.874775	0.936757	0.161749	0.491513	0.329083	0.742093	1	-0.132281
Acot7	ENSRNOG00000010580	acyl-CoA thioesterase 7 [Source:RGD Symbol;Acc:628856]	18801.4	0.217759	0.0946825	2.29989	0.0214545	0.0918048	-0.516955	0.09473	-5.45714	4.83877e-08	6.34849e-07	-0.0195607	0.0947042	-0.206545	0.836365	0.937043	-0.279635	0.0947517	-2.95124	0.00316504	0.0229156	0.114666	0.094745	1.21026	0.22618	0.389244	0.550063	0.0946395	5.81219	6.16611e-09	8.28717e-08	0.436474	0.0947249	4.60781	4.06928e-06	2.83205e-05	0.426869	0.0946664	4.5092	6.5074e-06	5.32472e-05	0.094571	0.094283	1.00305	0.315835	1	0.0815621
Acot8	ENSRNOG00000015187	acyl-CoA thioesterase 8 [Source:RGD Symbol;Acc:70368]	1838.13	0.3249	0.208515	1.55816	0.119195	0.320287	-0.601159	0.208681	-2.88075	0.00396729	0.0176638	-0.267367	0.208879	-1.28001	0.200541	0.419332	-0.00889181	0.209045	-0.0425354	0.966072	1	0.103303	0.208788	0.494775	0.620759	0.762226	0.729103	0.208396	3.49865	0.000467628	0.00264801	0.0843909	0.208874	0.404027	0.686193	0.814616	0.627593	0.208666	3.00764	0.00263282	0.0119161	0.223094	0.211188	1.05638	0.290796	1	-0.0246097
Acot9	ENSRNOG00000003782	acyl-CoA thioesterase 9 [Source:RGD Symbol;Acc:1359188]	2348.5	-0.0218996	0.219313	-0.0998554	0.920459	0.965466	0.13362	0.219177	0.609643	0.542098	0.724823	0.466264	0.21893	2.12974	0.0331934	0.123325	-0.354544	0.218795	-1.62044	0.105138	0.289453	-0.297433	0.218629	-1.36045	0.173688	0.320733	0.156072	0.219062	0.712456	0.476182	0.677382	0.253428	0.218579	1.15944	0.246278	0.41589	0.1344	0.218922	0.613919	0.539269	0.716097	-0.0435333	0.22026	-0.197645	0.843323	1	-0.586623
Acox1	ENSRNOG00000008755	acyl-CoA oxidase 1, palmitoyl [Source:RGD Symbol;Acc:619757]	570.324	2.08603	0.386433	5.39816	6.73285e-08	1.60709e-06	-0.829254	0.382594	-2.16745	0.0302004	0.0936661	1.33911	0.387271	3.4578	0.000544597	0.00484776	-0.0823371	0.383446	-0.214729	0.829978	0.943806	-1.58854	0.381648	-4.16232	3.15032e-05	0.000186393	-0.777297	0.3806	-2.04229	0.0411223	0.117192	-1.33001	0.381655	-3.48484	0.000492437	0.00226471	-2.86283	0.385418	-7.42786	1.10372e-13	2.11449e-12	0.000493255	0.381991	0.00129127	0.99897	1	0.0179571
Acox2	ENSRNOG00000007378	acyl-CoA oxidase 2, branched chain [Source:RGD Symbol;Acc:628684]	12.8447	-0.097745	0.306546	-0.31886	0.749833	NA	0.496325	0.306963	1.61689	0.105902	0.241182	0.102085	0.306863	0.332672	0.739382	0.881075	0.296495	0.307281	0.9649	0.334595	0.593749	0.427477	0.307521	1.39008	0.164506	NA	-0.0176027	0.306962	-0.0573448	0.954271	NA	0.192546	0.307112	0.626956	0.530688	0.695295	0.0695584	0.307205	0.226423	0.820872	NA	-0.0103408	0.304784	-0.0339282	0.972934	1	-0.0500836
Acox3	ENSRNOG00000008474	acyl-CoA oxidase 3, pristanoyl [Source:RGD Symbol;Acc:69245]	314.073	-0.0812367	0.496238	-0.163705	0.869963	0.946402	-0.167011	0.496281	-0.336525	0.736475	0.857255	-1.18179	0.496599	-2.37977	0.0173232	0.0759719	0.933545	0.496641	1.87972	0.0601464	0.199995	-0.577185	0.496096	-1.16345	0.244645	0.411852	-0.572676	0.496055	-1.15446	0.248311	0.44822	-1.41015	0.496481	-2.84028	0.00450737	0.0159766	-0.495867	0.49601	-0.999712	0.31745	0.519581	-0.00441688	0.495933	-0.00890622	0.992894	1	0.162095
Acoxl	ENSRNOG00000016179	acyl-CoA oxidase-like [Source:RGD Symbol;Acc:1306814]	0.657276	0	0.16388	0	1	NA	0	0.164123	0	1	NA	0	0.164235	0	1	NA	0	0.164478	0	1	NA	-0.102784	0.165777	-0.620015	0.535248	NA	0	0.165314	0	1	NA	-0.218982	0.165706	-1.32151	0.18633	NA	0	0.165703	0	1	NA	0	0.166974	0	1	1	-0.103336
Acp1	ENSRNOG00000005260	acid phosphatase 1, soluble [Source:RGD Symbol;Acc:2020]	7287.2	-0.268131	0.179134	-1.49682	0.134441	0.347263	0.283033	0.179108	1.58024	0.114052	0.254541	-0.439448	0.179152	-2.45293	0.0141699	0.0652627	0.454349	0.179126	2.53648	0.0111973	0.0599591	-0.0270642	0.178883	-0.151296	0.879742	0.933032	-0.466232	0.178967	-2.60513	0.00918404	0.0338963	-0.491411	0.179051	-2.74452	0.00605986	0.020703	-0.0722528	0.178871	-0.403939	0.686258	0.822852	0.125855	0.178445	0.705287	0.480632	1	0.156144
Acp2	ENSRNOG00000013594	acid phosphatase 2, lysosomal [Source:RGD Symbol;Acc:2021]	1369.99	0.189352	0.349557	0.541692	0.588031	0.796864	-0.0905454	0.349464	-0.259098	0.79556	0.893601	-0.865773	0.350189	-2.47231	0.0134245	0.0627322	0.96458	0.350097	2.75518	0.00586595	0.0369819	-0.173232	0.349217	-0.496059	0.619853	0.761716	-0.141776	0.349196	-0.406008	0.684737	0.825017	-1.29235	0.349862	-3.69388	0.000220855	0.00110727	-0.342096	0.349236	-0.979557	0.327305	0.529079	-0.0109592	0.349413	-0.0313646	0.974979	1	0.0590436
Acp5	ENSRNOG00000046261	acid phosphatase 5, tartrate resistant [Source:RGD Symbol;Acc:2022]	204.345	-0.0749076	0.487219	-0.153745	0.87781	0.94987	-0.885766	0.487704	-1.8162	0.0693404	0.176747	-0.668484	0.487461	-1.37136	0.170263	0.376473	-0.29219	0.487945	-0.598816	0.549295	0.781499	-0.630069	0.487588	-1.29222	0.196282	0.3509	0.123886	0.487088	0.254341	0.799232	0.895986	-0.250997	0.487486	-0.51488	0.606637	0.754567	0.222053	0.487006	0.455955	0.648422	0.796976	0.0231067	0.48793	0.0473567	0.962229	1	0.130911
Acp6	ENSRNOG00000017494	acid phosphatase 6, lysophosphatidic [Source:RGD Symbol;Acc:1306336]	592.553	0.523676	0.293065	1.78689	0.0739548	0.229705	-1.01318	0.293846	-3.44798	0.000564786	0.00334533	0.419256	0.293046	1.43068	0.152521	0.351707	-0.908758	0.293827	-3.09283	0.00198259	0.0156823	-0.550298	0.293747	-1.87338	0.0610163	0.143586	0.695087	0.292494	2.37642	0.0174818	0.0586281	0.697343	0.292917	2.38069	0.0172804	0.0509376	0.467025	0.293392	1.59181	0.111426	0.248968	0.294328	0.298068	0.987452	0.323421	1	-0.231227
Acpp	ENSRNOG00000011820	acid phosphatase, prostate [Source:RGD Symbol;Acc:2023]	3.81748	-0.16899	0.245573	-0.688146	0.491361	NA	-0.0329979	0.24538	-0.134477	0.893026	NA	-0.202027	0.245722	-0.822175	0.410977	NA	0	0.24553	0	1	NA	-0.292822	0.246486	-1.18799	0.234839	NA	-0.0647622	0.246184	-0.263064	0.792501	NA	-0.062521	0.246037	-0.254112	0.799409	NA	0.123169	0.246651	0.499364	0.617523	NA	0.0154792	0.225949	0.0685074	0.945382	1	-0.162972
Acpt	ENSRNOG00000021659	acid phosphatase, testicular [Source:RGD Symbol;Acc:1308270]	1.80867	0.217852	0.169939	1.28194	0.199863	NA	-0.217959	0.170039	-1.28182	0.199907	NA	0	0.169829	0	1	NA	0	0.169929	0	1	NA	0	0.170365	0	1	NA	0.218476	0.170521	1.28123	0.200114	NA	-0.126029	0.170344	-0.739851	0.45939	NA	0	0.170421	0	1	NA	0	0.170799	0	1	1	0
Acr	ENSRNOG00000029762	acrosin [Source:RGD Symbol;Acc:2024]	7.87992	0.229384	0.413327	0.55497	0.578915	NA	-0.388923	0.413075	-0.941532	0.346432	NA	-0.211815	0.412325	-0.51371	0.607455	NA	0.0522766	0.412072	0.126863	0.899049	NA	0.212608	0.412927	0.514881	0.606636	NA	0.631889	0.413809	1.52701	0.12676	NA	0.34874	0.411627	0.847224	0.39687	NA	0.25447	0.413984	0.614686	0.538762	NA	-0.140285	0.407308	-0.344419	0.730531	1	-0.0286832
Acrbp	ENSRNOG00000017399	acrosin binding protein [Source:RGD Symbol;Acc:1564880]	6.50451	-0.148625	0.255434	-0.581855	0.560665	NA	0.0293985	0.255393	0.11511	0.908358	NA	-0.148894	0.255575	-0.582584	0.560174	NA	0.0296669	0.255535	0.116097	0.907575	NA	-0.289502	0.256198	-1.12999	0.25848	NA	-0.24853	0.256015	-0.970764	0.331666	NA	-0.0171848	0.255803	-0.0671798	0.946439	NA	0.0722626	0.256201	0.282054	0.777902	NA	0.144075	0.236141	0.610125	0.541779	1	-0.0601918
Acrv1	ENSRNOG00000008508	acrosomal vesicle protein 1 [Source:RGD Symbol;Acc:620153]	2.04711	0	0.170158	0	1	NA	0	0.170246	0	1	NA	0	0.170286	0	1	NA	0	0.170374	0	1	NA	-0.145441	0.170862	-0.851216	0.394649	NA	0	0.170668	0	1	NA	0	0.170633	0	1	NA	-0.199317	0.170931	-1.16607	0.243586	NA	-0.199624	0.171236	-1.16578	0.243702	1	-0.145713
Acsbg1	ENSRNOG00000011381	acyl-CoA synthetase bubblegum family member 1 [Source:RGD Symbol;Acc:708557]	3901.5	0.412799	0.191132	2.15975	0.0307917	0.121168	-0.491514	0.19113	-2.57163	0.0101222	0.0387649	0.296494	0.19113	1.55127	0.120838	0.302491	-0.37521	0.191128	-1.96313	0.0496306	0.174932	-0.619535	0.190877	-3.24573	0.00117148	0.00492767	0.0972626	0.19073	0.50995	0.610087	0.775276	-0.264382	0.190714	-1.38627	0.165663	0.312177	-0.247121	0.190911	-1.29443	0.195517	0.371666	0.0683888	0.191326	0.357446	0.720758	1	-0.225196
Acsbg2	ENSRNOG00000045947	acyl-CoA synthetase bubblegum family member 2 [Source:RGD Symbol;Acc:1588580]	0.129593	0.133023	0.138819	0.958247	0.337938	NA	-0.134042	0.139214	-0.962851	0.335622	NA	0	0.1387	0	1	NA	0	0.139095	0	1	NA	0	0.142499	0	1	NA	0.0352472	0.1437	0.245284	0.806236	NA	0	0.141332	0	1	NA	0	0.143426	0	1	NA	0.0427147	0.163848	0.260696	0.794327	1	0.0377028
Acsf2	ENSRNOG00000003330	acyl-CoA synthetase family member 2 [Source:RGD Symbol;Acc:1562656]	1543.39	0.398499	0.261008	1.52677	0.126818	0.333802	-1.18796	0.261756	-4.53843	5.66756e-06	5.29632e-05	0.166513	0.261081	0.637782	0.523616	0.737976	-0.955975	0.26183	-3.65114	0.000261083	0.0030545	-0.729022	0.2617	-2.78571	0.00534099	0.0187775	0.114739	0.26048	0.440488	0.659584	0.808947	0.211876	0.26085	0.81225	0.416648	0.597967	-0.193928	0.260724	-0.743808	0.456993	0.652556	0.0897142	0.262155	0.342219	0.732186	1	0.343744
Acsl1	ENSRNOG00000010633	acyl-CoA synthetase long-chain family member 1 [Source:RGD Symbol;Acc:2015]	2845.1	0.573576	0.202464	2.83298	0.0046116	0.0278031	-0.282536	0.202233	-1.39708	0.162389	0.327781	0.399268	0.20249	1.97179	0.0486333	0.162659	-0.108228	0.202259	-0.535096	0.592584	0.811702	0.332629	0.202265	1.64452	0.100069	0.212352	0.497294	0.202102	2.4606	0.0138703	0.0484506	0.426006	0.202283	2.10599	0.0352048	0.0921615	0.204847	0.202483	1.01167	0.311695	0.513733	0.280937	0.203509	1.38046	0.167445	1	0.117792
Acsl3	ENSRNOG00000014718	acyl-CoA synthetase long-chain family member 3 [Source:RGD Symbol;Acc:70552]	7611.23	-0.198759	0.128438	-1.54752	0.121739	0.325138	-0.122476	0.128525	-0.952938	0.340622	0.543113	-0.235315	0.128406	-1.83259	0.0668638	0.203835	-0.0859206	0.128493	-0.66868	0.5037	0.745546	0.233041	0.128454	1.8142	0.0696468	0.159796	0.17793	0.12838	1.38596	0.165758	0.339058	0.189953	0.128429	1.47905	0.139127	0.273874	0.325646	0.128242	2.5393	0.0111076	0.0406409	-0.0510353	0.128735	-0.396437	0.691783	1	0.177558
Acsl4	ENSRNOG00000019180	acyl-CoA synthetase long-chain family member 4 [Source:RGD Symbol;Acc:69401]	2955.7	0.109717	0.211858	0.517881	0.604542	0.808321	-0.110842	0.211816	-0.523294	0.60077	0.768244	-0.0307077	0.211868	-0.144938	0.88476	0.961068	0.029583	0.211826	0.139657	0.888931	0.969572	0.189262	0.211701	0.894007	0.371318	0.547555	0.415235	0.211734	1.96112	0.0498652	0.13689	0.112323	0.211762	0.53042	0.595821	0.74635	0.237129	0.211686	1.12019	0.262631	0.45807	-0.0683472	0.212658	-0.321395	0.747911	1	-0.115062
Acsl5	ENSRNOG00000016265	acyl-CoA synthetase long-chain family member 5 [Source:RGD Symbol;Acc:69402]	1815.19	0.0326721	0.216283	0.151062	0.879927	0.950813	0.352396	0.215902	1.6322	0.102637	0.235796	0.189908	0.216044	0.879025	0.379388	0.616182	0.19516	0.215662	0.904936	0.365499	0.624586	0.384761	0.215488	1.78553	0.0741749	0.167832	0.108726	0.21589	0.503619	0.614529	0.778143	0.121275	0.215691	0.562262	0.573938	0.729111	-0.0105184	0.215747	-0.0487533	0.961116	0.980851	-0.0864612	0.217825	-0.39693	0.691419	1	-0.0762589
Acsl6	ENSRNOG00000026745	acyl-CoA synthetase long-chain family member 6 [Source:RGD Symbol;Acc:69403]	3808.05	0.394863	0.16476	2.3966	0.016548	0.0753109	-0.091346	0.16453	-0.555194	0.578762	0.753284	0.258935	0.164768	1.57151	0.116063	0.294588	0.0445821	0.164538	0.270953	0.786427	0.921641	0.24104	0.164424	1.46597	0.142657	0.278317	0.551847	0.164521	3.35426	0.000795764	0.00422666	0.0602189	0.164455	0.366173	0.714236	0.833635	0.0137763	0.164605	0.083693	0.933301	0.966782	-0.143133	0.165757	-0.863512	0.387856	1	-0.219346
Acsm1	NA	NA	1.30563	0	0.168597	0	1	NA	0	0.168725	0	1	NA	0	0.168784	0	1	NA	0	0.168911	0	1	NA	-0.085021	0.169565	-0.501405	0.616086	NA	-0.0267224	0.169374	-0.157772	0.874636	NA	-0.0629581	0.169369	-0.371722	0.7101	NA	-0.162769	0.169699	-0.959166	0.337475	NA	-0.135847	0.170272	-0.797822	0.424974	1	-0.0580505
Acsm3	ENSRNOG00000032246	acyl-CoA synthetase medium-chain family member 3 [Source:RGD Symbol;Acc:62086]	39.2004	-0.218498	0.427471	-0.511142	0.609252	NA	-0.475989	0.427018	-1.11468	0.264987	0.459713	-0.608651	0.427262	-1.42454	0.154291	0.354077	-0.0858361	0.42681	-0.201111	0.840612	0.949131	-0.052141	0.427103	-0.122081	0.902835	0.94844	0.333929	0.427476	0.781166	0.434705	0.642529	-0.232753	0.427252	-0.544769	0.585912	0.739242	0.386615	0.427802	0.903722	0.366143	0.567424	-0.163543	0.425643	-0.384225	0.700812	1	0.0885082
Acsm4	ENSRNOG00000014726	acyl-CoA synthetase medium-chain family member 4 [Source:RGD Symbol;Acc:727928]	8.083	0.271542	0.284562	0.954248	0.339958	NA	0.150549	0.285154	0.527956	0.59753	NA	-0.0348288	0.28433	-0.122495	0.902507	NA	0.45692	0.284922	1.60367	0.108787	NA	0.458059	0.285416	1.60488	0.10852	NA	0.160903	0.285309	0.56396	0.572781	NA	-0.0896415	0.284828	-0.314722	0.752973	NA	-0.0156779	0.285044	-0.0550016	0.956137	NA	0.0787483	0.265028	0.297132	0.766366	1	0.120921
Acsm5	ENSRNOG00000031211	acyl-CoA synthetase medium-chain family member 5 [Source:RGD Symbol;Acc:1309578]	52.6407	-0.791203	0.474876	-1.66612	0.0956888	0.275534	0.889222	0.474976	1.87214	0.0611873	0.160825	0.0969376	0.475625	0.203811	0.838501	0.937864	0.00108149	0.475725	0.00227335	0.998186	1	0.514404	0.475681	1.08141	0.279516	0.452878	-0.538108	0.475039	-1.13277	0.257312	0.458795	0.3831	0.475666	0.805397	0.42059	0.601411	0.56432	0.475602	1.18654	0.23541	0.424459	0.306085	0.473756	0.646081	0.518227	1	0.160787
Acss1	ENSRNOG00000007102	acyl-CoA synthetase short-chain family member 1 [Source:RGD Symbol;Acc:1306246]	1399.22	0.36334	0.222547	1.63264	0.102544	0.289107	-1.13444	0.22346	-5.07671	3.84025e-07	4.40402e-06	0.272639	0.222523	1.22522	0.220492	0.44447	-1.04374	0.223436	-4.67132	2.99266e-06	6.80194e-05	-0.232952	0.223785	-1.04096	0.297893	0.471709	0.700421	0.222332	3.15034	0.00163078	0.00782257	0.19186	0.222129	0.863732	0.387735	0.569565	0.352395	0.222529	1.58359	0.113286	0.252527	0.0152853	0.225627	0.0677461	0.945988	1	0.200704
Acss2	ENSRNOG00000018755	acyl-CoA synthetase short-chain family member 2 [Source:RGD Symbol;Acc:1305489]	1894.11	0.116363	0.225241	0.516614	0.605426	0.808919	0.197823	0.224919	0.87953	0.379114	0.582315	0.372002	0.224953	1.65369	0.0981908	0.262814	-0.057816	0.22463	-0.257384	0.796883	0.926032	0.0527721	0.224437	0.235131	0.814107	0.895732	-0.0247506	0.224725	-0.110137	0.9123	0.959228	0.183845	0.224529	0.818801	0.4129	0.594064	-0.103745	0.224744	-0.461615	0.644358	0.794162	0.0373236	0.22634	0.1649	0.869022	1	-0.120163
Acss3	ENSRNOG00000004448	acyl-CoA synthetase short-chain family member 3 [Source:RGD Symbol;Acc:1307051]	13.446	-0.0160807	0.357758	-0.0449485	0.964148	NA	-0.0169258	0.357856	-0.0472978	0.962276	0.985976	0.707066	0.359089	1.96906	0.0489467	0.163345	-0.740072	0.359187	-2.06041	0.0393595	0.147621	-0.236466	0.359098	-0.6585	0.510217	NA	-0.740975	0.359489	-2.06119	0.0392851	NA	0.741954	0.359672	2.06286	0.0391256	0.100341	-0.147893	0.359156	-0.41178	0.680501	NA	0.496588	0.337515	1.47131	0.141208	1	0.450739
Acta1	ENSRNOG00000017786	actin, alpha 1, skeletal muscle [Source:RGD Symbol;Acc:2025]	1709.58	-0.576868	0.258341	-2.23297	0.0255512	0.104982	0.310598	0.258445	1.20179	0.229443	0.417589	-0.563661	0.258239	-2.18271	0.0290569	0.111482	0.297392	0.258343	1.15115	0.249669	0.501549	0.421135	0.25814	1.63142	0.102802	0.216544	-0.104561	0.258296	-0.40481	0.685617	0.825739	-0.0104708	0.25835	-0.0405295	0.967671	0.988949	0.652617	0.257913	2.53037	0.0113941	0.0415249	0.1801	0.259551	0.693891	0.48775	1	0.214848
Acta2	ENSRNOG00000058039	actin, alpha 2, smooth muscle, aorta [Source:RGD Symbol;Acc:621676]	26.9572	-0.414623	0.486102	-0.852955	0.393684	NA	-0.104753	0.48555	-0.215742	0.829189	0.914155	-0.652916	0.485921	-1.34367	0.179056	0.38994	0.13354	0.485369	0.27513	0.783216	0.920763	-0.494628	0.486561	-1.01658	0.309354	0.483564	-0.5033	0.486665	-1.03418	0.301051	NA	-0.0878371	0.48568	-0.180854	0.856482	0.928669	0.0293699	0.487242	0.0602778	0.951934	0.975568	0.115289	0.484313	0.238047	0.811845	1	0.110755
Actb	ENSRNOG00000034254	actin, beta [Source:RGD Symbol;Acc:628837]	95134.3	0.136528	0.0616292	2.21531	0.0267391	0.108654	-0.520851	0.0616685	-8.44599	3.01491e-17	9.84269e-16	-0.25116	0.061661	-4.07324	4.63631e-05	0.000597068	-0.133163	0.0617003	-2.15823	0.03091	0.125123	-1.63573	0.0615613	-26.5708	1.47743e-155	7.89526e-153	-1.03972	0.0615106	-16.9031	4.27036e-64	1.92708e-61	-1.45353	0.0615492	-23.6158	2.65281e-123	2.08395e-120	-1.21513	0.061517	-19.7527	7.59675e-87	2.2813e-84	-0.0388893	0.0599751	-0.648424	0.516711	1	-0.0751743
Actc1	ENSRNOG00000008536	actin, alpha, cardiac muscle 1 [Source:RGD Symbol;Acc:2026]	11.0913	-0.219006	0.246504	-0.888449	0.3743	NA	0	0.246426	0	1	NA	0.0978112	0.246748	0.396402	0.691808	NA	-0.316937	0.246669	-1.28486	0.19884	NA	-0.126183	0.246775	-0.511328	0.609122	NA	0	0.24667	0	1	NA	0.293466	0.246831	1.18893	0.234466	NA	0.130644	0.246911	0.529115	0.596725	NA	-0.0685816	0.221807	-0.309194	0.757174	1	-0.0981926
Actg1	ENSRNOG00000036701	actin, gamma 1 [Source:RGD Symbol;Acc:1304556]	13773.2	0.0379203	0.0657812	0.576461	0.564303	0.780876	-0.349685	0.0659093	-5.30555	1.12333e-07	1.40628e-06	-0.201391	0.0658446	-3.05858	0.00222387	0.0152575	-0.110374	0.0659725	-1.67302	0.0943228	0.269319	-0.674195	0.0655734	-10.2815	8.53653e-25	2.48631e-23	-0.382532	0.0654124	-5.84801	4.97486e-09	6.79512e-08	-0.466298	0.0655831	-7.11003	1.16018e-12	1.67229e-11	-0.405825	0.0653846	-6.20673	5.40982e-10	7.32613e-09	0.0146263	0.0659478	0.221786	0.82448	1	0.0580162
Actg2	ENSRNOG00000029401	actin, gamma 2, smooth muscle, enteric [Source:RGD Symbol;Acc:2027]	30.8584	0.151913	0.339563	0.447377	0.654603	NA	-0.0251727	0.339677	-0.0741078	0.940925	0.975814	0.19156	0.339644	0.564002	0.572753	0.773576	-0.0648201	0.339758	-0.190783	0.848696	0.952008	-0.160689	0.33997	-0.472656	0.636458	0.774335	-0.11973	0.339934	-0.352217	0.724675	NA	0.0471896	0.339892	0.138837	0.889579	0.947472	-0.282223	0.339913	-0.830281	0.40638	0.607308	-0.0105153	0.339102	-0.0310093	0.975262	1	-0.0156889
Actl6a	ENSRNOG00000011553	actin-like 6A [Source:RGD Symbol;Acc:1307747]	390.532	0.157709	0.484585	0.325452	0.744839	0.885381	-0.373951	0.484628	-0.771625	0.440337	0.638729	-0.698364	0.484856	-1.44035	0.149767	0.34839	0.482121	0.484899	0.994272	0.320091	0.57913	-0.408883	0.484491	-0.843944	0.398701	0.574965	-0.00964262	0.484406	-0.0199061	0.984118	0.9948	-1.08619	0.484674	-2.24106	0.0250219	0.0698114	-0.38275	0.484384	-0.79018	0.429423	0.627216	-0.214891	0.484449	-0.443578	0.657348	1	-0.0252273
Actl6b	ENSRNOG00000001408	actin-like 6B [Source:RGD Symbol;Acc:1307763]	4921.18	0.273176	0.148022	1.84551	0.0649636	0.209092	-0.938078	0.148356	-6.32317	2.56256e-10	4.49844e-09	-0.176926	0.148167	-1.1941	0.23244	0.458784	-0.487976	0.148501	-3.28602	0.00101613	0.00922256	-0.317187	0.148384	-2.1376	0.032549	0.086518	0.582053	0.147914	3.93507	8.31739e-05	0.000559403	0.224922	0.148188	1.51782	0.129061	0.257912	0.290018	0.147957	1.96015	0.0499787	0.13561	-0.0188515	0.148946	-0.126566	0.899284	1	0.0388249
Actl7b	ENSRNOG00000016621	actin-like 7b [Source:RGD Symbol;Acc:1305655]	0.497699	0	0.160424	0	1	NA	0	0.160745	0	1	NA	0	0.160892	0	1	NA	0	0.161213	0	1	NA	-0.310117	0.163493	-1.89682	0.0578523	NA	0	0.162333	0	1	NA	0	0.162179	0	1	NA	0	0.162855	0	1	NA	0	0.165408	0	1	1	-0.286173
Actn1	ENSRNOG00000056756	actinin, alpha 1 [Source:RGD Symbol;Acc:70907]	2152.36	1.35773	0.22647	5.9952	2.0324e-09	6.5766e-08	-2.6284	0.227666	-11.5449	7.82944e-31	6.22837e-29	0.936025	0.226557	4.13153	3.60359e-05	0.000480313	-2.20669	0.227753	-9.68897	3.35892e-22	1.24171e-19	0.635404	0.229717	2.76603	0.00567438	0.0197799	3.21055	0.227826	14.0921	4.24622e-45	7.01703e-43	2.81568	0.228305	12.333	6.01636e-35	3.11192e-33	1.51694	0.227734	6.66099	2.71992e-11	4.24307e-10	-0.335538	0.230736	-1.4542	0.14589	1	0.0531946
Actn2	ENSRNOG00000017833	actinin alpha 2 [Source:RGD Symbol;Acc:1308097]	1577.16	1.41041	0.384914	3.66422	0.000248094	0.00246377	-3.79517	0.38644	-9.82085	9.15672e-23	4.32534e-21	-0.36556	0.385237	-0.948923	0.34266	0.582721	-2.01921	0.386761	-5.2208	1.78147e-07	5.48807e-06	0.5315	0.388316	1.36873	0.171084	0.317355	2.82017	0.385228	7.32079	2.46508e-13	5.49863e-12	1.93196	0.38634	5.00067	5.7131e-07	4.51907e-06	1.16464	0.3853	3.02267	0.00250554	0.0113615	-0.245161	0.385283	-0.636314	0.524572	1	1.50675
Actn3	ENSRNOG00000019745	actinin alpha 3 [Source:RGD Symbol;Acc:621792]	9.04217	0.355998	0.291461	1.22143	0.221925	NA	-0.1137	0.291835	-0.389605	0.696829	NA	0	0.291199	0	1	NA	0.242583	0.291573	0.831981	0.40542	NA	0.0707476	0.292168	0.242147	0.808666	NA	0.205962	0.292185	0.704902	0.480871	NA	-0.112094	0.291715	-0.384259	0.700787	NA	-0.113826	0.291893	-0.389957	0.696568	NA	0.0305316	0.271847	0.112312	0.910576	1	-0.0182443
Actn4	ENSRNOG00000020433	actinin alpha 4 [Source:RGD Symbol;Acc:61816]	8778.14	1.30366	0.196721	6.62695	3.42701e-11	1.55164e-09	-1.80395	0.196839	-9.1646	4.97316e-20	1.97185e-18	1.51013	0.196692	7.67766	1.62022e-14	1.20501e-12	-2.01043	0.19681	-10.2151	1.69776e-24	8.79626e-22	0.299708	0.19712	1.52043	0.128402	0.256366	2.70693	0.197	13.7407	5.78795e-43	8.70641e-41	2.1925	0.196781	11.1418	7.84898e-29	3.08293e-27	1.28236	0.197098	6.50617	7.70919e-11	1.13903e-09	-0.120959	0.196496	-0.615579	0.538173	1	-0.603478
Actr10	ENSRNOG00000007504	actin-related protein 10 homolog (S. cerevisiae) [Source:RGD Symbol;Acc:1306515]	5277.06	0.433454	0.175198	2.47408	0.0133578	0.0643187	-0.825043	0.175352	-4.70506	2.53793e-06	2.52768e-05	0.0423802	0.175298	0.24176	0.808966	0.920543	-0.433969	0.175453	-2.47342	0.0133826	0.0679619	-0.637534	0.175244	-3.63798	0.000274786	0.00135421	0.266873	0.174941	1.5255	0.127135	0.279078	-0.183739	0.175083	-1.04944	0.293975	0.471127	-0.169984	0.175061	-0.970999	0.331549	0.533036	-0.00340195	0.175232	-0.019414	0.984511	1	-0.079348
Actr1a	ENSRNOG00000019725	ARP1 actin-related protein 1 homolog A, centractin alpha (yeast) [Source:RGD Symbol;Acc:1307025]	12365.2	0.340674	0.109899	3.09989	0.00193593	0.013921	-0.0834715	0.109795	-0.760252	0.447104	0.645121	0.362513	0.109861	3.29974	0.000967752	0.00783238	-0.105311	0.109757	-0.959493	0.33731	0.596798	0.210716	0.10973	1.92031	0.0548182	0.131876	0.192214	0.109706	1.75208	0.0797603	0.196685	0.334755	0.109745	3.0503	0.00228612	0.00886313	-0.25558	0.109754	-2.32867	0.0198767	0.0655258	-0.107118	0.109586	-0.977476	0.328333	1	0.101972
Actr1b	ENSRNOG00000016789	ARP1 actin-related protein 1 homolog B, centractin beta (yeast) [Source:RGD Symbol;Acc:1307380]	16752.8	0.263472	0.0828479	3.18019	0.00147176	0.011202	0.115001	0.0826859	1.39082	0.164281	0.330429	0.414611	0.0827619	5.00969	5.45187e-07	1.16143e-05	-0.0361377	0.0825997	-0.437504	0.661746	0.856766	-0.281996	0.0824439	-3.42046	0.000625149	0.00284161	-0.156867	0.0825556	-1.90013	0.0574155	0.153138	-0.357216	0.0824398	-4.33305	1.47056e-05	9.3069e-05	-0.49339	0.0826026	-5.97306	2.32846e-09	2.98819e-08	-0.0730492	0.0824133	-0.886376	0.375415	1	-0.240124
Actr2	ENSRNOG00000004959	ARP2 actin-related protein 2 homolog (yeast) [Source:RGD Symbol;Acc:1310826]	8127.73	0.710561	0.147121	4.82977	1.36691e-06	2.44273e-05	-1.23455	0.147336	-8.37914	5.33159e-17	1.70951e-15	0.0532136	0.14729	0.361285	0.717886	0.868693	-0.577204	0.147505	-3.91312	9.11104e-05	0.00127809	-1.03056	0.147257	-6.99841	2.58882e-12	3.60761e-11	0.223093	0.14681	1.51961	0.128609	0.281472	-0.629385	0.14698	-4.2821	1.85135e-05	0.000115253	-0.397936	0.147025	-2.70658	0.00679806	0.0269055	0.0895272	0.146795	0.60988	0.541941	1	-0.019103
Actr3	ENSRNOG00000003206	ARP3 actin-related protein 3 homolog (yeast) [Source:RGD Symbol;Acc:71024]	7395.96	0.617182	0.151076	4.08523	4.40327e-05	0.000533187	-0.845307	0.15115	-5.59249	2.23837e-08	3.08149e-07	0.152728	0.151201	1.0101	0.312447	0.549605	-0.380853	0.151275	-2.51762	0.0118151	0.0622917	-1.00204	0.150971	-6.63727	3.19549e-11	4.00773e-10	0.000192327	0.150686	0.00127634	0.998982	1	-0.626986	0.15082	-4.15718	3.22202e-05	0.000192434	-0.631091	0.150888	-4.18251	2.8831e-05	0.000211169	-0.0141002	0.15068	-0.0935773	0.925445	1	-0.156908
Actr3b	ENSRNOG00000031855	ARP3 actin-related protein 3 homolog B (yeast) [Source:RGD Symbol;Acc:1565759]	3029.18	0.541102	0.239707	2.25735	0.0239863	0.0998773	-0.978066	0.239937	-4.07635	4.57488e-05	0.000351692	-0.0745057	0.239944	-0.310513	0.756171	0.889584	-0.362458	0.240174	-1.50915	0.13126	0.333496	-1.12132	0.239716	-4.67772	2.9008e-06	2.03387e-05	0.176868	0.239314	0.739062	0.45987	0.664734	-0.63335	0.239554	-2.64387	0.00819641	0.0268563	-0.474858	0.239491	-1.98278	0.047392	0.13003	-0.110582	0.239636	-0.461457	0.644471	1	-0.320006
Actr5	ENSRNOG00000023989	ARP5 actin-related protein 5 homolog (yeast) [Source:RGD Symbol;Acc:1307958]	427.709	-0.198872	0.351198	-0.566267	0.571212	0.785489	-0.57471	0.352363	-1.63101	0.102887	0.236243	0.165368	0.350562	0.471723	0.637125	0.819067	-0.93895	0.35173	-2.66952	0.00759594	0.0450771	-0.459583	0.351786	-1.30643	0.191407	0.344348	0.499941	0.35139	1.42275	0.154809	0.322108	0.123468	0.350097	0.352669	0.724337	0.840977	0.292014	0.350393	0.833389	0.404625	0.605577	-0.4045	0.355266	-1.13858	0.254877	1	-0.382636
Actr6	ENSRNOG00000007875	ARP6 actin-related protein 6 homolog (yeast) [Source:RGD Symbol;Acc:1304609]	1701.85	0.335233	0.178802	1.87489	0.0608077	0.199243	-0.551753	0.178981	-3.08275	0.002051	0.0101173	0.0534987	0.178978	0.298912	0.765007	0.894287	-0.270019	0.179157	-1.50716	0.13177	0.33388	-0.251186	0.178744	-1.40528	0.159938	0.302013	0.283013	0.17816	1.58854	0.112165	0.254159	-0.0353645	0.178485	-0.198137	0.842938	0.92021	0.0160117	0.17845	0.0897263	0.928505	0.963909	0.0681246	0.181717	0.374894	0.70774	1	0.0175204
Actr8	ENSRNOG00000015280	ARP8 actin-related protein 8 homolog (yeast) [Source:RGD Symbol;Acc:1311878]	2643.61	0.115887	0.22998	0.503899	0.614332	0.813342	-0.19543	0.229978	-0.849775	0.39545	0.597232	0.257231	0.229855	1.1191	0.263097	0.496476	-0.336774	0.229853	-1.46517	0.142874	0.35253	0.165447	0.229885	0.719694	0.471713	0.64356	0.222053	0.229762	0.966446	0.333821	0.545581	0.295196	0.229694	1.28517	0.198732	0.35692	0.0951453	0.229749	0.414128	0.67878	0.818379	-0.0110135	0.230578	-0.0477647	0.961904	1	0.138737
Actrt2	ENSRNOG00000012586	actin-related protein T2 [Source:RGD Symbol;Acc:1359657]	4.0926	0	0.171685	0	1	NA	0	0.171732	0	1	NA	0.272347	0.171891	1.58442	0.113098	NA	-0.272398	0.171938	-1.58428	0.113129	NA	0	0.172006	0	1	NA	0	0.171959	0	1	NA	0.193623	0.172112	1.12498	0.260596	NA	0	0.172031	0	1	NA	0	0.172099	0	1	1	0
Actrt3	ENSRNOG00000027908	actin-related protein T3 [Source:RGD Symbol;Acc:1561457]	17.9565	0.0976996	0.239851	0.407335	0.683762	NA	-0.0977519	0.239881	-0.407501	0.68364	0.826218	0.420682	0.239988	1.75293	0.0796145	0.229723	-0.420735	0.240019	-1.75292	0.0796152	0.241653	-0.0924094	0.240045	-0.384968	0.700261	0.82229	0.0705639	0.240034	0.293975	0.768777	NA	0.420888	0.240108	1.75291	0.0796172	0.176835	-0.0893917	0.240057	-0.372377	0.709612	NA	-0.049833	0.219127	-0.227417	0.8201	1	-0.0522254
Acvr1	ENSRNOG00000005033	activin A receptor, type I [Source:RGD Symbol;Acc:620200]	201.167	0.0577714	0.493876	0.116976	0.906879	0.960457	-0.48417	0.493804	-0.98049	0.326844	0.528578	-0.653858	0.493744	-1.32428	0.185409	0.39911	0.227459	0.493673	0.460748	0.644979	0.84595	-0.932435	0.493933	-1.88777	0.0590562	0.139839	-0.145829	0.493984	-0.29521	0.767834	0.876749	-1.16242	0.493864	-2.35372	0.0185866	0.054115	-0.514722	0.494021	-1.0419	0.297457	0.497225	-0.310918	0.493755	-0.6297	0.528891	1	-0.302237
Acvr1b	ENSRNOG00000006934	activin A receptor, type IB [Source:RGD Symbol;Acc:735207]	268.458	0.0522653	0.477337	0.109494	0.912811	0.962468	-0.561956	0.477769	-1.17621	0.239511	0.429488	0.423008	0.476974	0.886857	0.375156	0.612301	-0.932699	0.477408	-1.95367	0.0507399	0.177581	-1.52066	0.47695	-3.18829	0.00143117	0.00589492	-1.06757	0.476447	-2.2407	0.0250456	0.0789522	-0.548614	0.476196	-1.15208	0.24929	0.41996	-1.29529	0.476388	-2.71898	0.00654844	0.0261155	-0.174678	0.476653	-0.366467	0.714017	1	0.10837
Acvr1c	ENSRNOG00000004828	activin A receptor, type IC [Source:RGD Symbol;Acc:621789]	309.756	0.33644	0.501952	0.670263	0.50269	0.740333	-0.563883	0.501977	-1.12333	0.261299	0.455011	-0.177086	0.502012	-0.352753	0.724274	0.871973	-0.0503577	0.502036	-0.100307	0.920101	0.982951	-0.224872	0.50195	-0.447997	0.654156	0.787023	-0.235099	0.501821	-0.468491	0.639433	0.795174	-0.434487	0.501929	-0.865636	0.38669	0.56879	-0.578326	0.501856	-1.15238	0.249167	0.441003	-0.0067742	0.501643	-0.013504	0.989226	1	0.572763
Acvr2a	ENSRNOG00000005334	activin A receptor, type IIA [Source:RGD Symbol;Acc:70911]	432.029	0.689324	0.446172	1.54498	0.122352	0.326373	-1.84115	0.447573	-4.11363	3.89483e-05	0.000303309	-0.176449	0.446727	-0.394981	0.692857	0.853334	-0.975379	0.448125	-2.17658	0.029512	0.121023	-1.52932	0.447448	-3.41786	0.000631155	0.00285963	-0.368875	0.445286	-0.828401	0.407444	0.619401	-0.774326	0.446095	-1.73579	0.0826015	0.182175	-1.42302	0.44564	-3.19321	0.00140702	0.00690405	-0.363836	0.445956	-0.815857	0.414582	1	0.67854
Acvr2b	ENSRNOG00000014477	activin A receptor, type IIB [Source:RGD Symbol;Acc:2028]	1621.65	0.821029	0.229785	3.57303	0.000352877	0.00334066	-0.488982	0.229388	-2.13168	0.0330333	0.10012	0.969186	0.22963	4.22065	2.43599e-05	0.000339822	-0.63714	0.229233	-2.77945	0.00544516	0.034972	0.432301	0.229657	1.88238	0.059785	0.141221	1.12301	0.229525	4.89278	9.94207e-07	9.65648e-06	0.875409	0.229203	3.81937	0.000133796	0.000700991	0.522928	0.230262	2.27102	0.0231459	0.0739229	0.220616	0.232527	0.948779	0.342733	1	-0.201437
Acvrl1	ENSRNOG00000028713	activin A receptor type II-like 1 [Source:RGD Symbol;Acc:2029]	238.27	0.558654	0.502472	1.11181	0.266219	0.521217	-0.322525	0.502404	-0.641964	0.520896	0.707237	1.02668	0.502391	2.0436	0.0409934	0.144084	-0.790556	0.502323	-1.5738	0.115534	0.308115	0.46004	0.502446	0.915601	0.359876	0.536415	0.364194	0.502331	0.725008	0.468447	0.671426	0.667902	0.502256	1.3298	0.183583	0.336953	-0.67352	0.502364	-1.3407	0.180017	0.350387	-0.477039	0.502291	-0.949727	0.342251	1	0.416057
Acy1	ENSRNOG00000011189	aminoacylase 1 [Source:RGD Symbol;Acc:2030]	1628.94	0.92419	0.287283	3.217	0.0012954	0.00999918	-0.763986	0.287094	-2.6611	0.00778851	0.031266	0.445561	0.287468	1.54995	0.121154	0.302882	-0.285358	0.287279	-0.993313	0.320557	0.579724	-0.313038	0.28705	-1.09053	0.275478	0.44793	0.51398	0.286684	1.79285	0.0729976	0.184388	0.0432252	0.286967	0.150628	0.880269	0.942719	-0.378709	0.287201	-1.31862	0.187297	0.36101	0.0314685	0.287851	0.109322	0.912947	1	-0.062965
Acy3	ENSRNOG00000017901	aminoacylase 3 [Source:RGD Symbol;Acc:1305394]	132.699	-0.244137	0.478862	-0.509826	0.610173	0.811039	-0.269967	0.478712	-0.563946	0.572791	0.749381	-0.306405	0.478883	-0.639833	0.522281	0.73701	-0.207699	0.478732	-0.433852	0.664396	0.858347	-0.853598	0.478995	-1.78206	0.0747392	0.168935	-0.427149	0.479036	-0.891684	0.372562	0.585805	-0.709898	0.47906	-1.48186	0.138378	0.272785	-0.558513	0.479203	-1.1655	0.243815	0.434979	-0.374566	0.478717	-0.782437	0.433958	1	-0.156058
Acyp1	ENSRNOG00000006744	acylphosphatase 1, erythrocyte (common) type [Source:RGD Symbol;Acc:1311327]	2654.35	-0.403802	0.169653	-2.38017	0.0173047	0.0780921	1.44662	0.169007	8.55948	1.13374e-17	3.85136e-16	0.303723	0.168953	1.79767	0.0722288	0.215369	0.739091	0.168305	4.39138	1.12634e-05	0.000211613	1.4754	0.16852	8.75501	2.04091e-18	4.23015e-17	0.155811	0.169652	0.918417	0.3584	0.57117	0.760139	0.169038	4.49686	6.89646e-06	4.64283e-05	0.966068	0.169469	5.70054	1.19428e-08	1.40782e-07	0.406085	0.171829	2.3633	0.0181128	1	-0.126916
Acyp2	ENSRNOG00000042419	acylphosphatase 2, muscle type [Source:RGD Symbol;Acc:1595836]	7144.65	-0.570555	0.127247	-4.48383	7.33166e-06	0.000109212	1.06109	0.127075	8.35008	6.82176e-17	2.14357e-15	-0.184596	0.127013	-1.45336	0.146123	0.342393	0.675129	0.12684	5.32267	1.02254e-07	3.40007e-06	1.16293	0.126863	9.16681	4.87216e-20	1.1008e-18	-0.0906745	0.127219	-0.712744	0.476004	0.677293	0.403783	0.127104	3.1768	0.00148912	0.00604676	0.788948	0.127008	6.21181	5.23773e-10	7.11715e-09	0.309004	0.127681	2.42013	0.015515	0.916411	0.192479
Ada	ENSRNOG00000010265	adenosine deaminase [Source:RGD Symbol;Acc:2031]	106.239	-0.00767474	0.49866	-0.0153907	0.98772	0.995293	1.01187	0.498931	2.02808	0.0425518	0.1225	0.554116	0.498858	1.11077	0.266668	0.499877	0.450083	0.499128	0.901737	0.367197	0.626057	0.948542	0.499113	1.90046	0.0573732	0.13645	-0.269176	0.498883	-0.539557	0.589502	0.761941	-0.088655	0.499114	-0.177625	0.859018	0.930374	-0.224826	0.498917	-0.450628	0.652258	0.799318	0.0363667	0.498234	0.0729913	0.941813	1	0.203976
Adad1	ENSRNOG00000017246	adenosine deaminase domain containing 1 (testis specific) [Source:RGD Symbol;Acc:1359309]	0.0461931	0	0.137628	0	1	NA	0	0.137628	0	1	NA	0	0.137628	0	1	NA	0	0.137628	0	1	NA	0	0.137628	0	1	NA	0	0.137628	0	1	NA	0	0.137628	0	1	NA	-0.121731	0.137703	-0.88401	0.376691	NA	-0.0345242	0.163848	-0.210708	0.833115	1	0
Adal	ENSRNOG00000012166	adenosine deaminase-like [Source:RGD Symbol;Acc:1359517]	105.062	1.49295	0.505064	2.95596	0.00311695	0.0206147	-0.561036	0.504473	-1.11212	0.266085	0.461109	-0.0934479	0.505802	-0.184752	0.853424	0.94512	1.02536	0.505235	2.02948	0.0424098	0.156364	-0.734184	0.504272	-1.45593	0.145413	0.282215	-0.505932	0.504019	-1.0038	0.315477	0.52486	-1.69611	0.504921	-3.35916	0.000781791	0.00343098	-2.17423	0.504749	-4.30755	1.6507e-05	0.000126053	-0.173175	0.504627	-0.343175	0.731467	1	0.328129
Adam10	ENSRNOG00000054257	ADAM metallopeptidase domain 10 [Source:RGD Symbol;Acc:2032]	971.823	-0.166656	0.347419	-0.479696	0.631444	0.820788	0.248499	0.34729	0.715536	0.474278	0.668446	0.176509	0.347044	0.508607	0.611027	0.800583	-0.0946662	0.346915	-0.27288	0.784945	0.921133	-0.341987	0.346542	-0.986856	0.323713	0.498779	-0.520448	0.346856	-1.50047	0.133493	0.288979	-0.29074	0.346521	-0.839026	0.401454	0.581792	-0.503561	0.346566	-1.453	0.146223	0.302937	-0.149506	0.347502	-0.43023	0.667028	1	-0.0699153
Adam11	ENSRNOG00000002753	ADAM metallopeptidase domain 11 [Source:RGD Symbol;Acc:1307515]	597.661	0.463619	0.405345	1.14376	0.252721	0.506965	0.848108	0.40242	2.10752	0.0350726	0.105159	1.14379	0.403858	2.83215	0.00462365	0.0274514	0.167942	0.400914	0.418897	0.675292	0.863541	-1.5609	0.399302	-3.90908	9.26473e-05	0.000502084	-1.89669	0.40121	-4.72742	2.27393e-06	2.0795e-05	-1.72457	0.399572	-4.31604	1.58856e-05	9.99887e-05	-2.84103	0.402218	-7.06341	1.62462e-12	2.8079e-11	-0.479486	0.399836	-1.19921	0.230448	1	-0.51101
Adam15	ENSRNOG00000020590	ADAM metallopeptidase domain 15 [Source:RGD Symbol;Acc:620402]	2010.13	0.323997	0.237267	1.36554	0.172084	0.404535	-0.160302	0.237083	-0.676142	0.498951	0.690901	0.18636	0.237278	0.785408	0.432215	0.663327	-0.0226649	0.237095	-0.0955942	0.923843	0.984299	-0.064829	0.236826	-0.273741	0.784283	0.878806	0.173064	0.236811	0.73081	0.464895	0.668185	0.308658	0.237102	1.30179	0.192987	0.349115	-0.522573	0.236812	-2.2067	0.0273351	0.0842569	-0.371272	0.238024	-1.55981	0.118805	1	-0.0775132
Adam17	ENSRNOG00000060694	ADAM metallopeptidase domain 17 [Source:RGD Symbol;Acc:620404]	475.129	0.260438	0.504557	0.516172	0.605734	0.808919	-0.614393	0.504575	-1.21764	0.223359	0.409514	-0.85448	0.504629	-1.69328	0.0904015	0.248209	0.500525	0.504646	0.991834	0.321279	0.580647	-0.158331	0.50457	-0.313793	0.753678	0.857887	0.20965	0.504527	0.415538	0.677748	0.820896	-0.532118	0.504627	-1.05448	0.291664	0.46831	-0.00497854	0.504536	-0.00986756	0.992127	0.996357	0.0458278	0.504167	0.090898	0.927574	1	0.246517
Adam19	ENSRNOG00000042980	ADAM metallopeptidase domain 19 [Source:RGD Symbol;Acc:1585017]	410.656	0.0258974	0.350537	0.0738791	0.941107	0.973864	0.19845	0.35007	0.566888	0.57079	0.747786	0.604897	0.349599	1.73026	0.0835842	0.236904	-0.380549	0.34913	-1.08999	0.275717	0.529728	0.0690931	0.349152	0.197888	0.843132	0.912023	0.438179	0.3503	1.25087	0.210982	0.402216	0.858769	0.34943	2.45763	0.0139858	0.0425635	0.114265	0.34971	0.326744	0.743862	0.861148	-0.29625	0.354361	-0.836013	0.403147	1	-0.564259
Adam1a	NA	NA	197.227	0.67986	0.50057	1.35817	0.174409	0.406977	0.278801	0.500276	0.557294	0.577327	0.75235	1.11906	0.500452	2.23609	0.0253457	0.100813	-0.160395	0.500157	-0.320688	0.748447	0.903412	0.768091	0.500261	1.53538	0.12469	0.250747	0.109362	0.500259	0.218611	0.826953	0.912464	0.68067	0.50021	1.36077	0.173587	0.322706	-0.339178	0.500481	-0.677703	0.49796	0.684851	0.229816	0.500495	0.459177	0.646107	1	0.377341
Adam23	ENSRNOG00000012424	ADAM metallopeptidase domain 23 [Source:RGD Symbol;Acc:1305739]	963.218	0.0623464	0.269191	0.231607	0.816844	0.919872	-0.407031	0.269499	-1.51033	0.13096	0.281241	-0.316904	0.269487	-1.17595	0.239613	0.468674	-0.0277807	0.269795	-0.10297	0.917987	0.982391	-0.0091943	0.269348	-0.0341354	0.972769	0.986717	0.262075	0.268847	0.974811	0.329654	0.541793	-0.158479	0.269287	-0.588513	0.556188	0.714872	0.0666576	0.26867	0.248102	0.804055	0.896529	-0.132741	0.271875	-0.488243	0.625378	1	0.135421
Adam30	ENSRNOG00000019044	ADAM metallopeptidase domain 30 [Source:RGD Symbol;Acc:1594713]	20.7947	-0.199146	0.494015	-0.403116	0.686863	NA	0.521802	0.494527	1.05515	0.291355	0.489886	0.0606254	0.494584	0.122578	0.902441	0.968396	0.262031	0.495094	0.529254	0.596629	0.81405	0.343897	0.495492	0.694051	0.48765	0.65692	-0.139353	0.494627	-0.281733	0.778148	NA	0.0554115	0.495048	0.111932	0.910878	0.96023	0.08344	0.495104	0.16853	0.866166	NA	0.0227041	0.491881	0.0461576	0.963185	1	-0.0370677
Adam32	ENSRNOG00000025728	ADAM metallopeptidase domain 32 [Source:RGD Symbol;Acc:735114]	25.1506	0.62834	0.378311	1.66091	0.0967317	NA	-0.599965	0.378441	-1.58536	0.112884	0.252868	0	0.377822	0	1	1	0.0288847	0.377952	0.0764242	0.939082	0.990485	-0.31584	0.378636	-0.83415	0.404196	0.580168	-0.104554	0.379354	-0.275611	0.782847	NA	-0.163523	0.378354	-0.432195	0.6656	0.799267	-0.396743	0.378655	-1.04777	0.294745	0.494797	0.303199	0.361238	0.839333	0.401283	1	0.349548
Adam4	ENSRNOG00000038275	a disintegrin and metalloprotease domain 4 [Source:RGD Symbol;Acc:621470]	17.6746	0	0.271573	0	1	NA	0.678921	0.271962	2.49638	0.0125468	0.0462466	0	0.27165	0	1	1	0.679083	0.272039	2.49627	0.0125506	0.0647308	0.652431	0.272279	2.39618	0.0165668	0.0494951	-0.0885973	0.271917	-0.325825	0.744557	NA	-0.151234	0.271931	-0.556147	0.57811	0.732378	-0.0244603	0.271969	-0.0899377	0.928337	NA	0.0487011	0.246691	0.197418	0.843501	1	0.047172
Adam4l1	NA	NA	13.5319	0.126107	0.358647	0.351619	0.725124	NA	0.326099	0.359456	0.907201	0.3643	0.56803	0	0.358636	0	1	1	0.452851	0.359445	1.25986	0.20772	0.447366	0.181074	0.360389	0.50244	0.615358	NA	-0.534199	0.360145	-1.48329	0.137998	NA	-0.266693	0.359553	-0.741734	0.458249	0.635101	-0.194949	0.359694	-0.541985	0.587829	NA	0.402465	0.337493	1.19251	0.233061	1	0.338495
Adam5	ENSRNOG00000017518	a disintegrin and metallopeptidase domain 5 [Source:RGD Symbol;Acc:621471]	2.02216	0	0.170118	0	1	NA	0	0.170207	0	1	NA	0	0.170247	0	1	NA	0	0.170336	0	1	NA	0	0.170722	0	1	NA	0	0.170634	0	1	NA	-0.148788	0.170722	-0.871523	0.383469	NA	-0.195977	0.170898	-1.14675	0.251486	NA	-0.196294	0.171209	-1.14651	0.251583	1	0
Adam9	ENSRNOG00000017231	ADAM metallopeptidase domain 9 [Source:RGD Symbol;Acc:621473]	629.91	-0.122243	0.499821	-0.244573	0.806787	0.915177	-0.242635	0.499804	-0.48546	0.62735	0.788612	-0.424082	0.499809	-0.848487	0.396167	0.631345	0.059204	0.499791	0.118457	0.905705	0.977403	-0.904111	0.499856	-1.80874	0.0704907	0.161341	-0.776553	0.499869	-1.55351	0.120301	0.267987	-1.16948	0.499853	-2.33964	0.0193024	0.0558884	-0.746807	0.499883	-1.49396	0.135185	0.286696	-0.0924476	0.499569	-0.185055	0.853186	1	0.11501
Adamts1	ENSRNOG00000001607	ADAM metallopeptidase with thrombospondin type 1 motif, 1 [Source:RGD Symbol;Acc:621241]	86.739	-0.310748	0.473641	-0.656083	0.511771	0.746699	1.20057	0.473969	2.533	0.011309	0.0425197	-0.738332	0.47344	-1.55951	0.118877	0.299161	1.62815	0.473769	3.43659	0.000589086	0.00592812	0.751868	0.474391	1.58491	0.112986	0.233045	0.0750123	0.473717	0.158348	0.874182	0.938834	-0.276817	0.47339	-0.584755	0.558712	0.71687	0.28877	0.473987	0.609236	0.542368	0.718769	-0.0961318	0.472928	-0.203269	0.838925	1	-0.519874
Adamts10	ENSRNOG00000008857	ADAM metallopeptidase with thrombospondin type 1 motif, 10 [Source:RGD Symbol;Acc:1598320]	222.321	-0.812763	0.503647	-1.61376	0.106581	0.29633	-0.129808	0.503782	-0.257668	0.796663	0.894458	-1.32416	0.503737	-2.62868	0.00857174	0.0448162	0.381592	0.503872	0.757319	0.448859	0.69835	-0.622247	0.503629	-1.23553	0.216635	0.377094	-0.507558	0.50362	-1.00782	0.313541	0.522707	-0.758254	0.503763	-1.50518	0.132278	0.263153	0.353924	0.503478	0.702957	0.482083	0.672479	0.0485067	0.503511	0.096337	0.923253	1	0.0150539
Adamts12	ENSRNOG00000018865	ADAM metallopeptidase with thrombospondin type 1 motif, 12 [Source:RGD Symbol;Acc:1307323]	57.0179	0.0523348	0.428287	0.122196	0.902744	0.958283	0.119841	0.428454	0.279705	0.779704	0.885019	0.433397	0.428584	1.01123	0.311906	0.549377	-0.261221	0.428751	-0.609262	0.542351	0.775331	-0.448111	0.428999	-1.04455	0.296231	0.470411	-0.464269	0.42883	-1.08264	0.278968	0.484325	-0.211427	0.4291	-0.492721	0.62221	0.765008	-0.433156	0.428833	-1.01008	0.312457	0.514776	0.082894	0.42805	0.193655	0.846446	1	-0.103052
Adamts14	ENSRNOG00000000563	ADAM metallopeptidase with thrombospondin type 1 motif, 14 [Source:RGD Symbol;Acc:1308899]	8.70746	0.0205906	0.269925	0.0762826	0.939194	NA	-0.0207757	0.270014	-0.0769432	0.938669	NA	0	0.270032	0	1	NA	0	0.27012	0	1	NA	-0.276331	0.270701	-1.0208	0.30735	NA	-0.104803	0.270531	-0.387397	0.698463	NA	-0.128317	0.270489	-0.474391	0.635221	NA	-0.405799	0.270796	-1.49854	0.133992	NA	-0.218978	0.239825	-0.913074	0.361204	1	-0.115801
Adamts15	ENSRNOG00000009892	ADAM metallopeptidase with thrombospondin type 1 motif, 15 [Source:RGD Symbol;Acc:1309770]	108.272	-0.269802	0.507838	-0.531275	0.595228	0.802252	0.376553	0.507834	0.741487	0.458398	0.655696	0.238164	0.507824	0.468988	0.639078	0.820655	-0.131413	0.50782	-0.258778	0.795806	0.925358	1.27593	0.507842	2.51245	0.0119897	0.0375296	1.1068	0.507856	2.17935	0.0293055	0.0889566	0.844235	0.50783	1.66244	0.0964253	0.205872	0.931171	0.507836	1.83361	0.0667126	0.169562	-0.437329	0.507558	-0.861633	0.388889	1	-0.203263
Adamts18	ENSRNOG00000011575	ADAM metallopeptidase with thrombospondin type 1 motif, 18 [Source:RGD Symbol;Acc:1560118]	37.8171	0.0272443	0.37217	0.0732039	0.941644	NA	-0.304112	0.372056	-0.817382	0.41371	0.614866	0.139715	0.372289	0.375287	0.707447	0.863292	-0.416583	0.372175	-1.11932	0.263003	0.515225	-0.224288	0.372277	-0.602475	0.546858	0.707072	0.0502333	0.372418	0.134884	0.892703	0.948225	0.0402773	0.372504	0.108126	0.913896	0.961769	-0.0618998	0.372499	-0.166174	0.86802	0.932585	-0.0807499	0.365029	-0.221215	0.824925	1	0.0280576
Adamts19	ENSRNOG00000019577	ADAM metallopeptidase with thrombospondin type 1 motif, 19 [Source:RGD Symbol;Acc:1308359]	37.2334	-0.292327	0.457266	-0.639294	0.522632	NA	-0.302255	0.456651	-0.661894	0.508039	0.69795	-0.703284	0.456866	-1.53937	0.123715	0.30664	0.108702	0.456251	0.238251	0.811686	0.933992	-0.0688588	0.457006	-0.150674	0.880233	0.933311	-0.440772	0.457829	-0.962744	0.335676	0.547621	-0.786142	0.457247	-1.71929	0.0855609	0.187289	-0.626391	0.458498	-1.36618	0.171883	0.340085	-0.471326	0.456044	-1.03351	0.301366	1	0.658749
Adamts2	ENSRNOG00000061484	ADAM metallopeptidase with thrombospondin type 1 motif, 2 [Source:RGD Symbol;Acc:1565950]	135.964	-0.140781	0.506268	-0.278075	0.780955	0.903626	0.613064	0.506335	1.21079	0.225976	0.413074	-0.035072	0.506303	-0.0692707	0.944774	0.987687	0.507356	0.506369	1.00195	0.316369	0.575961	0.0635002	0.506458	0.125381	0.900222	0.946442	-0.672579	0.506378	-1.32822	0.184107	0.365407	-1.10099	0.506431	-2.17401	0.0297043	0.0805162	-0.336014	0.506401	-0.663534	0.506989	0.691647	0.194587	0.505966	0.384586	0.700544	1	0.122282
Adamts3	ENSRNOG00000027463	ADAM metallopeptidase with thrombospondin type 1, motif 3 [Source:RGD Symbol;Acc:1310750]	439.999	0.18334	0.419057	0.437506	0.661745	0.840759	-1.03344	0.419876	-2.46129	0.0138438	0.0501883	-0.374795	0.419429	-0.893584	0.371545	0.609481	-0.475301	0.420246	-1.13101	0.258053	0.510841	-0.771401	0.419686	-1.83805	0.0660558	0.153245	-0.0132951	0.418576	-0.0317627	0.974661	0.990952	-0.512724	0.419088	-1.22343	0.221167	0.386251	-0.376433	0.418554	-0.899365	0.368458	0.56938	-0.179123	0.420066	-0.426415	0.669805	1	0.274229
Adamts4	ENSRNOG00000003538	ADAM metallopeptidase with thrombospondin type 1 motif, 4 [Source:RGD Symbol;Acc:621242]	981.581	0.708173	0.287165	2.46608	0.01366	0.065334	-0.0843603	0.28644	-0.294513	0.768366	0.877639	0.325171	0.287398	1.13143	0.257874	0.490276	0.298642	0.286673	1.04175	0.297527	0.554592	0.422022	0.286406	1.47351	0.140613	0.275247	0.574655	0.28645	2.00612	0.0448429	0.125691	0.188985	0.286856	0.658814	0.510015	0.679102	-0.12662	0.287045	-0.441114	0.659131	0.803642	0.00688362	0.289259	0.0237974	0.981014	1	-0.068111
Adamts5	ENSRNOG00000057794	ADAM metallopeptidase with thrombospondin type 1 motif, 5 [Source:RGD Symbol;Acc:735196]	38.568	0.0342749	0.471115	0.0727528	0.942003	NA	-0.0452625	0.47117	-0.0960639	0.92347	0.967296	-0.983687	0.470143	-2.09232	0.0364103	0.132458	0.9727	0.470198	2.0687	0.0385741	0.145466	0.996157	0.470713	2.11628	0.0343214	0.0904469	0.214627	0.471378	0.455317	0.648881	0.801368	-0.497352	0.470037	-1.05811	0.290004	0.466299	0.613144	0.471184	1.30128	0.193161	0.36892	0.425118	0.469061	0.906317	0.364768	1	0.808658
Adamts7	ENSRNOG00000028036	ADAM metallopeptidase with thrombospondin type 1 motif, 7 [Source:RGD Symbol;Acc:1306713]	22.4534	0.744004	0.379131	1.96239	0.049717	NA	-0.292787	0.379718	-0.771065	0.440668	0.639137	0.0770302	0.3786	0.203461	0.838775	0.937864	0.374186	0.379186	0.986814	0.323734	0.583454	0.221717	0.379746	0.583857	0.559317	0.716847	0.396355	0.380019	1.04299	0.296954	NA	0.0079174	0.379085	0.0208856	0.983337	0.995817	-0.386868	0.379401	-1.01968	0.30788	NA	-0.0368093	0.370511	-0.0993473	0.920863	1	0.110317
Adamts9	ENSRNOG00000023257	ADAM metallopeptidase with thrombospondin type 1 motif, 9 [Source:RGD Symbol;Acc:1306889]	88.5543	0.00484112	0.490173	0.00987635	0.99212	0.996713	0.080799	0.490228	0.164819	0.869086	0.938345	0.0948343	0.490241	0.193444	0.846611	0.94177	-0.00919412	0.490296	-0.0187522	0.985039	1	0.396081	0.490303	0.807828	0.419189	0.594598	0.391835	0.490229	0.799289	0.424123	0.634562	0.0771068	0.490355	0.157247	0.87505	0.939561	0.170966	0.490335	0.348671	0.727336	0.850376	-0.214004	0.489295	-0.437372	0.661842	1	-0.0757902
Adamtsl3	ENSRNOG00000010840	ADAMTS-like 3 [Source:RGD Symbol;Acc:1305155]	103.753	0.0739482	0.5077	0.145653	0.884195	0.951965	-0.198423	0.507703	-0.390826	0.695926	0.833331	0.584223	0.507666	1.1508	0.249814	0.481213	-0.708698	0.507669	-1.39598	0.162719	0.38379	-0.575568	0.507656	-1.13378	0.256889	0.425905	0.22096	0.507676	0.435238	0.66339	0.81149	0.921822	0.507665	1.81581	0.0693999	0.158684	-0.168699	0.507657	-0.332308	0.739657	0.858314	-0.31201	0.507466	-0.614839	0.538661	1	-0.591673
Adamtsl4	ENSRNOG00000049385	ADAMTS-like 4 [Source:RGD Symbol;Acc:1561012]	52.6077	0.721441	0.384106	1.87823	0.0603495	0.198228	-0.587925	0.384221	-1.53017	0.125974	0.273371	0.0496308	0.383869	0.129291	0.897127	0.9669	0.0838846	0.383984	0.218459	0.827072	0.942679	-0.324376	0.384313	-0.84404	0.398647	0.574955	0.551259	0.384435	1.43394	0.151588	0.316868	-0.301708	0.38419	-0.785311	0.432271	0.612253	-0.365048	0.384225	-0.950088	0.342067	0.54406	-0.193929	0.383653	-0.505481	0.613221	1	-0.286393
Adamtsl5	ENSRNOG00000033787	ADAMTS-like 5 [Source:RGD Symbol;Acc:1305607]	51.5885	0.264621	0.434771	0.608644	0.54276	0.765542	0.309582	0.43516	0.711421	0.476823	0.670805	0.447779	0.434942	1.02951	0.303239	0.541008	0.126424	0.43533	0.29041	0.771503	0.915987	0.206793	0.435487	0.474855	0.63489	0.773174	0.185763	0.435151	0.426893	0.669457	0.815738	0.223225	0.435295	0.512815	0.608081	0.755159	-0.18917	0.435103	-0.43477	0.66373	0.807273	-0.10909	0.433825	-0.25146	0.801458	1	-0.285631
Adap1	ENSRNOG00000054033	ArfGAP with dual PH domains 1 [Source:RGD Symbol;Acc:621418]	2568.33	0.154017	0.152052	1.01292	0.311098	0.571119	1.17938	0.150948	7.81314	5.57799e-15	1.50774e-13	1.22088	0.151147	8.07746	6.61304e-16	5.89498e-14	0.112509	0.150036	0.749879	0.453328	0.701795	1.87071	0.151115	12.3794	3.37866e-35	1.42216e-33	0.898868	0.152291	5.90229	3.58485e-09	5.00726e-08	1.59359	0.151166	10.542	5.53187e-26	1.8951e-24	0.68287	0.152166	4.48767	7.20077e-06	5.8443e-05	-0.0619175	0.155428	-0.398369	0.690358	1	-0.207328
Adap2	ENSRNOG00000037148	ArfGAP with dual PH domains 2 [Source:RGD Symbol;Acc:708487]	203.38	-0.254436	0.507819	-0.501037	0.616345	0.814705	0.948257	0.507805	1.86736	0.0618506	0.162161	0.497365	0.507801	0.979447	0.327359	0.566278	0.196456	0.507787	0.386887	0.69884	0.878505	0.539116	0.507786	1.0617	0.288372	0.461508	-0.484602	0.507805	-0.954307	0.339928	0.55256	0.0717713	0.507787	0.141341	0.8876	0.946747	-0.459081	0.507793	-0.904071	0.365958	0.567211	-0.228072	0.507501	-0.449401	0.653142	1	0.0751531
Adar	ENSRNOG00000020744	adenosine deaminase, RNA-specific [Source:RGD Symbol;Acc:71099]	882.397	-0.250631	0.341961	-0.732923	0.463605	0.711727	-0.00314758	0.342136	-0.00919977	0.99266	1	0.183717	0.34142	0.538098	0.59051	0.785742	-0.437496	0.341596	-1.28074	0.200285	0.437653	-0.692487	0.341159	-2.02981	0.0423758	0.107434	-0.686639	0.34126	-2.01207	0.044213	0.124341	-0.304043	0.340796	-0.892155	0.37231	0.554779	-0.776075	0.340761	-2.27748	0.0227579	0.0729564	-0.339372	0.341982	-0.992368	0.321018	1	-0.00269731
Adarb1	ENSRNOG00000001227	adenosine deaminase, RNA-specific, B1 [Source:RGD Symbol;Acc:2033]	9454.46	0.0700681	0.158335	0.442531	0.658105	0.838941	0.220188	0.158258	1.39132	0.164128	0.330333	0.130214	0.158296	0.822599	0.410736	0.643342	0.160041	0.158219	1.01151	0.311771	0.571648	0.951963	0.158302	6.01359	1.81464e-09	1.95133e-08	0.585309	0.158325	3.69689	0.000218253	0.00134212	0.561446	0.158314	3.54641	0.000390523	0.00184529	0.393754	0.158278	2.48773	0.0128562	0.0457311	-0.121499	0.157889	-0.769522	0.441583	1	0.14648
Adarb2	ENSRNOG00000030775	adenosine deaminase, RNA-specific, B2 [Source:RGD Symbol;Acc:621519]	106.435	0.549718	0.507354	1.0835	0.278587	0.536789	-0.953391	0.507307	-1.87932	0.060201	0.159131	-0.308571	0.50727	-0.608297	0.542991	0.751801	-0.0951029	0.507222	-0.187498	0.85127	0.952517	-0.961686	0.507344	-1.89553	0.0580223	0.137807	-0.519134	0.507468	-1.02299	0.306313	0.513865	-0.869945	0.507352	-1.71468	0.0864046	0.188746	-0.773052	0.507409	-1.52353	0.127627	0.275481	0.293744	0.507011	0.579364	0.562343	1	0.50704
Adat1	ENSRNOG00000019434	adenosine deaminase, tRNA-specific 1 [Source:RGD Symbol;Acc:1591020]	137.184	-0.0419164	0.470093	-0.0891662	0.92895	0.968607	-0.0616307	0.470119	-0.131096	0.895699	0.951813	-0.572469	0.470694	-1.21622	0.2239	0.448263	0.468922	0.470719	0.996181	0.319162	0.578462	-0.0596482	0.469529	-0.127038	0.89891	0.946116	-0.286446	0.469327	-0.610334	0.54164	0.728876	-0.666892	0.470216	-1.41827	0.156113	0.299113	-0.342982	0.469076	-0.731187	0.464665	0.658709	-0.0973337	0.471687	-0.206352	0.836516	1	0.28493
Adat2	ENSRNOG00000046983	adenosine deaminase, tRNA-specific 2 [Source:MGI Symbol;Acc:MGI:1914007]	486.243	-0.119521	0.378244	-0.315989	0.752011	0.888045	0.177837	0.378113	0.470329	0.63812	0.796004	-0.348552	0.378365	-0.921206	0.356943	0.597153	0.406868	0.378234	1.07571	0.282059	0.536826	0.101769	0.377566	0.269539	0.787515	0.880431	0.178537	0.37801	0.472306	0.636708	0.793468	-0.182869	0.37819	-0.483538	0.628714	0.769734	0.467154	0.377876	1.23626	0.216361	0.398793	0.16834	0.380616	0.442284	0.658284	1	-0.253517
Adat3	NA	NA	218.369	-1.06289	0.465517	-2.28324	0.0224162	0.0949271	0.352532	0.465981	0.756538	0.449327	0.64714	-0.36117	0.464733	-0.777155	0.437067	0.667841	-0.349184	0.4652	-0.750609	0.452888	0.701736	-0.123145	0.465065	-0.264791	0.791171	0.882579	-0.491169	0.465523	-1.05509	0.291384	0.498006	0.460791	0.465059	0.990821	0.321773	0.501285	0.32932	0.464357	0.709196	0.478203	0.669596	-0.24057	0.466516	-0.515675	0.606082	1	0.0153746
Adck1	ENSRNOG00000012685	aarF domain containing kinase 1 [Source:RGD Symbol;Acc:1308263]	420.194	0.614272	0.466584	1.31653	0.187996	0.426405	-1.07057	0.466828	-2.29328	0.0218322	0.0724989	0.661498	0.466523	1.41793	0.156211	0.356724	-1.11779	0.466767	-2.39475	0.0166317	0.0798791	-1.14011	0.466634	-2.44327	0.0145547	0.044324	0.128166	0.466152	0.274945	0.783359	0.88698	0.140811	0.466142	0.302077	0.762593	0.869943	-0.512938	0.466385	-1.09982	0.271412	0.468682	-0.026755	0.466582	-0.0573426	0.954272	1	-0.197168
Adck2	ENSRNOG00000010005	aarF domain containing kinase 2 [Source:RGD Symbol;Acc:1311058]	305.66	0.907524	0.474834	1.91125	0.055973	0.188358	0.130367	0.474054	0.275005	0.783312	0.886578	1.54503	0.47451	3.25605	0.00112972	0.00884701	-0.507139	0.473729	-1.07053	0.284383	0.539451	-0.127009	0.473713	-0.268115	0.788611	0.881092	-0.120673	0.473867	-0.254655	0.79899	0.895986	0.316782	0.473542	0.668963	0.503519	0.673699	-0.494522	0.474674	-1.04181	0.297499	0.497225	0.530925	0.474669	1.11852	0.263346	1	-0.136099
Adck3	ENSRNOG00000043201	aarF domain containing kinase 3 [Source:RGD Symbol;Acc:1308245]	1923.03	0.416748	0.221814	1.87882	0.0602696	0.198109	-0.400082	0.221735	-1.80432	0.0711808	0.180377	0.618089	0.221633	2.78879	0.00529048	0.0305448	-0.601422	0.221554	-2.71456	0.0066363	0.0406211	0.209793	0.221774	0.945979	0.344159	0.521586	0.83985	0.221706	3.78812	0.000151793	0.000969786	0.797531	0.221495	3.60067	0.000317393	0.00152906	0.664744	0.222057	2.99357	0.00275737	0.0123958	0.241354	0.224068	1.07715	0.281414	1	-0.229709
Adck4	ENSRNOG00000020848	aarF domain containing kinase 4 [Source:RGD Symbol;Acc:1311356]	1358.62	0.839734	0.317251	2.64691	0.00812306	0.0433798	-1.6031	0.318206	-5.03792	4.70619e-07	5.33382e-06	0.515462	0.317388	1.62407	0.10436	0.274243	-1.27883	0.318344	-4.01712	5.89128e-05	0.000876302	-2.04251	0.317756	-6.42793	1.29353e-10	1.54507e-09	-0.487319	0.316081	-1.54175	0.123133	0.272281	-0.749229	0.316308	-2.36867	0.017852	0.0523766	-0.912998	0.316859	-2.8814	0.0039591	0.0170615	0.413581	0.316886	1.30514	0.191844	1	0.0478501
Adck5	ENSRNOG00000030334	aarF domain containing kinase 5 [Source:RGD Symbol;Acc:1305504]	930.741	0.249592	0.292343	0.853765	0.393235	0.651328	-0.688061	0.292708	-2.35067	0.0187395	0.0641091	-0.0445651	0.292486	-0.152366	0.878898	0.958098	-0.393904	0.292851	-1.34507	0.178604	0.40628	0.153838	0.292959	0.525118	0.599501	0.747233	0.568462	0.292141	1.94585	0.051673	0.140668	0.237891	0.29242	0.813527	0.415916	0.597173	0.787947	0.292601	2.6929	0.00708327	0.0278417	0.467902	0.295364	1.58416	0.113158	1	0.272759
Adcy1	ENSRNOG00000059479	adenylate cyclase 1 (brain) [Source:RGD Symbol;Acc:1309318]	497.385	0.345255	0.373642	0.924024	0.355474	0.612868	0.731095	0.372233	1.96408	0.0495213	0.137539	1.80254	0.372278	4.84192	1.2859e-06	2.54527e-05	-0.726194	0.370862	-1.95813	0.0502152	0.176328	0.538991	0.371407	1.45121	0.14672	0.283901	0.562005	0.373104	1.5063	0.131991	0.287054	1.50752	0.371348	4.05959	4.91584e-05	0.00028252	0.372218	0.373614	0.996266	0.319121	0.521251	0.154691	0.376164	0.411231	0.680903	1	-0.750674
Adcy10	ENSRNOG00000053410	adenylate cyclase 10 (soluble) [Source:RGD Symbol;Acc:708450]	46.5602	0.285932	0.4327	0.66081	0.508734	0.745211	0.182098	0.433153	0.4204	0.674194	0.819847	0.127044	0.432668	0.29363	0.769041	0.896917	0.340986	0.433121	0.787275	0.431121	0.683237	-0.309813	0.433768	-0.714235	0.475082	0.646361	-0.46662	0.433556	-1.07626	0.281809	0.487176	-0.670746	0.433457	-1.54744	0.121758	0.246835	-0.392419	0.43323	-0.9058	0.365042	0.566449	0.345393	0.427347	0.808226	0.418961	1	-0.0244312
Adcy2	ENSRNOG00000032150	adenylate cyclase 2 (brain) [Source:RGD Symbol;Acc:619965]	5221.66	0.14363	0.178601	0.804194	0.421285	0.677347	0.194973	0.178436	1.09267	0.274537	0.47153	0.388828	0.178467	2.17871	0.029353	0.112413	-0.0502254	0.178301	-0.281688	0.778183	0.918606	0.013653	0.178197	0.0766173	0.938928	0.968336	0.378656	0.17847	2.12168	0.0338646	0.0998576	0.0992022	0.178231	0.556595	0.577804	0.732269	0.107428	0.178429	0.602074	0.547125	0.722205	-0.127573	0.178696	-0.71391	0.475283	1	-0.559866
Adcy3	ENSRNOG00000003999	adenylate cyclase 3 [Source:RGD Symbol;Acc:71009]	1899.6	-0.0254663	0.218573	-0.116511	0.907247	0.960669	-0.768591	0.219202	-3.50631	0.000454358	0.00277359	-0.640555	0.218991	-2.92503	0.00344426	0.0215485	-0.153502	0.219619	-0.698947	0.484585	0.728646	-0.512366	0.219014	-2.33942	0.0193135	0.0562249	0.227517	0.218383	1.04183	0.297492	0.504258	-0.058764	0.219157	-0.268137	0.788594	0.88502	0.0926809	0.218192	0.424768	0.671006	0.812568	-0.160116	0.220252	-0.726969	0.467245	1	0.0286723
Adcy4	ENSRNOG00000020401	adenylate cyclase 4 [Source:RGD Symbol;Acc:2034]	23.0295	0.281973	0.376057	0.749814	0.453367	NA	-0.282487	0.376172	-0.750952	0.452682	0.650035	0.352948	0.376274	0.938008	0.34824	0.589005	-0.353463	0.376389	-0.939088	0.347685	0.60736	-0.780072	0.377079	-2.06872	0.0385719	0.0998093	0.284974	0.376725	0.756449	0.44938	NA	-0.49691	0.377461	-1.31645	0.188022	0.342649	0	0.376528	0	1	NA	0	0.329881	0	1	1	-0.549656
Adcy5	ENSRNOG00000002229	adenylate cyclase 5 [Source:RGD Symbol;Acc:71014]	3196.74	0.252518	0.227255	1.11117	0.266496	0.52148	-1.52573	0.227829	-6.69683	2.12983e-11	4.19589e-10	-0.230864	0.227364	-1.01539	0.309919	0.548027	-1.04235	0.227938	-4.57295	4.80901e-06	0.000101417	0.513838	0.228517	2.24857	0.0245396	0.0685804	1.08255	0.227347	4.76168	1.91992e-06	1.78074e-05	1.63504	0.228189	7.16529	7.76241e-13	1.14514e-11	0.779714	0.227341	3.42971	0.000604235	0.00327088	-0.0502993	0.228061	-0.220552	0.825442	1	0.956619
Adcy6	ENSRNOG00000054757	adenylate cyclase 6 [Source:RGD Symbol;Acc:2035]	803.771	0.394793	0.38435	1.02717	0.304341	0.565028	0.311705	0.383978	0.811777	0.41692	0.618174	0.307403	0.384335	0.799832	0.423808	0.656096	0.399094	0.383963	1.03941	0.298615	0.555878	1.67093	0.384491	4.34582	1.38759e-05	8.70147e-05	1.02626	0.384395	2.66981	0.00758947	0.0289302	0.853877	0.384458	2.22099	0.0263516	0.0728582	0.821676	0.384618	2.13634	0.0326516	0.097178	0.189789	0.385819	0.491911	0.622782	1	0.332212
Adcy7	ENSRNOG00000014776	adenylate cyclase 7 [Source:RGD Symbol;Acc:619966]	100.349	-0.444868	0.437563	-1.01669	0.309299	0.569892	0.11711	0.437483	0.267691	0.788937	0.889022	-0.621111	0.437539	-1.41956	0.155737	0.356096	0.293354	0.437459	0.670585	0.502485	0.744742	0.00727904	0.437704	0.0166301	0.986732	0.994454	-0.648714	0.437742	-1.48196	0.138352	0.297196	-0.693462	0.437652	-1.58451	0.113079	0.233496	-0.0572182	0.43791	-0.130662	0.896043	0.94761	0.146442	0.437587	0.334659	0.737882	1	0.538047
Adcy8	ENSRNOG00000004890	adenylate cyclase 8 (brain) [Source:RGD Symbol;Acc:2036]	535.221	0.266583	0.411748	0.647442	0.517346	0.749678	0.360689	0.411335	0.876875	0.380554	0.583458	0.365951	0.411621	0.889049	0.373977	0.611404	0.261321	0.411207	0.635496	0.525105	0.761704	1.40306	0.411699	3.40796	0.000654499	0.00295317	0.750613	0.411693	1.82323	0.0682679	0.175297	0.838166	0.411708	2.03583	0.0417679	0.105886	0.0952331	0.411541	0.231406	0.817	0.904664	-0.387498	0.413047	-0.938145	0.34817	1	0.290675
Adcyap1	ENSRNOG00000049882	adenylate cyclase activating polypeptide 1 [Source:RGD Symbol;Acc:2037]	381.218	0.670217	0.429007	1.56225	0.118229	0.31831	0.0819356	0.428056	0.191413	0.848202	0.925679	0.0272702	0.429609	0.0634768	0.949387	0.989949	0.724882	0.42866	1.69104	0.090829	0.262848	-0.711542	0.427205	-1.66558	0.0957978	0.204952	-0.167089	0.427658	-0.390708	0.696013	0.832697	-1.24928	0.428138	-2.91794	0.0035235	0.012938	-0.782263	0.428386	-1.82607	0.0678398	0.171448	0.0547882	0.429147	0.127668	0.898412	1	-0.623755
Adcyap1r1	ENSRNOG00000012098	adenylate cyclase activating polypeptide 1 receptor type 1 [Source:RGD Symbol;Acc:2038]	3537.73	0.262337	0.178537	1.46937	0.141732	0.358728	-0.869439	0.178848	-4.86134	1.16594e-06	1.23045e-05	-0.207771	0.178702	-1.16267	0.244964	0.475293	-0.399331	0.179012	-2.23074	0.0256981	0.109195	0.321624	0.179184	1.79494	0.0726629	0.165114	0.524773	0.178404	2.94148	0.00326646	0.0141893	0.618864	0.178974	3.45784	0.000544525	0.00247617	0.102619	0.1784	0.575222	0.565141	0.736037	-0.15973	0.17956	-0.889563	0.373701	1	0.665927
Add1	ENSRNOG00000013039	adducin 1 (alpha) [Source:RGD Symbol;Acc:2041]	13060.9	0.218079	0.0913871	2.38633	0.0170177	0.0770503	-0.390347	0.0914208	-4.26979	1.95661e-05	0.000162435	0.115805	0.0913813	1.26728	0.205057	0.425377	-0.288073	0.091415	-3.15127	0.00162564	0.0134073	-0.184239	0.091323	-2.01744	0.0436497	0.109871	0.0752662	0.0911834	0.825438	0.409123	0.620908	0.0347452	0.0912429	0.380799	0.703352	0.826286	-0.105668	0.0912247	-1.15833	0.246731	0.438422	0.0371425	0.0913501	0.406595	0.684305	1	0.130833
Add2	ENSRNOG00000015903	adducin 2 (beta) [Source:RGD Symbol;Acc:2042]	2045.5	0.347247	0.27127	1.28008	0.200518	0.441221	-0.101702	0.271087	-0.375164	0.707538	0.84103	0.596543	0.271107	2.2004	0.0277789	0.107854	-0.350998	0.270924	-1.29556	0.195126	0.43024	0.380551	0.271054	1.40397	0.160328	0.302656	0.522651	0.271059	1.92818	0.0538327	0.1454	0.276095	0.270769	1.01967	0.307885	0.48645	0.11995	0.271147	0.442379	0.658215	0.803226	-0.0554113	0.271874	-0.203812	0.8385	1	-0.0403659
Add3	ENSRNOG00000012820	adducin 3 (gamma) [Source:RGD Symbol;Acc:2043]	3800.51	0.356208	0.232412	1.53266	0.12536	0.331849	0.00203632	0.232258	0.00876751	0.993005	1	-0.0478653	0.232513	-0.205861	0.8369	0.937115	0.40611	0.232359	1.74777	0.0805039	0.243703	0.507443	0.232243	2.18496	0.0288919	0.0784253	0.396959	0.232235	1.7093	0.0873951	0.21021	-0.0288715	0.23239	-0.124237	0.901128	0.954193	-0.0052025	0.232302	-0.0223954	0.982133	0.991126	-0.0459462	0.232286	-0.1978	0.843201	1	0.108429
Adgrb2	ENSRNOG00000014375	adhesion G protein-coupled receptor B2 [Source:RGD Symbol;Acc:1309431]	11077.7	0.259017	0.128319	2.01855	0.0435341	0.156573	-0.195766	0.128285	-1.52603	0.127003	0.275035	0.284484	0.12829	2.21751	0.0265885	0.104598	-0.221233	0.128256	-1.72493	0.0845405	0.251578	0.869834	0.128412	6.77375	1.25487e-11	1.63385e-10	0.993909	0.128363	7.74293	9.71527e-15	2.58479e-13	0.988502	0.128385	7.69953	1.3657e-14	2.34182e-13	0.803329	0.128393	6.25678	3.93015e-10	5.42632e-09	0.0684384	0.128302	0.533417	0.593745	1	0.0716925
Adgrb3	ENSRNOG00000012045	adhesion G protein-coupled receptor B3 [Source:RGD Symbol;Acc:1309703]	2933.57	0.242427	0.176067	1.3769	0.168542	0.400487	-0.0591776	0.17589	-0.336447	0.736534	0.857255	0.102728	0.176079	0.58342	0.559611	0.764039	0.0805213	0.175902	0.457762	0.647123	0.847083	0.534465	0.175918	3.03815	0.00238033	0.00923795	0.393373	0.175807	2.23753	0.0252518	0.0793897	0.284509	0.175958	1.61691	0.105897	0.222059	0.0363274	0.17582	0.206617	0.836309	0.914264	-0.114532	0.177427	-0.645519	0.518591	1	0.200122
Adgre1	ENSRNOG00000046254	adhesion G protein-coupled receptor E1 [Source:RGD Symbol;Acc:1359214]	354.751	-1.62594	0.423046	-3.84342	0.000121332	0.00130872	1.40108	0.423178	3.31084	0.000930168	0.00514354	0.217213	0.42008	0.517076	0.605103	0.796862	-0.44208	0.420215	-1.05203	0.292784	0.549419	-0.137093	0.420128	-0.326312	0.744188	0.85215	-1.06966	0.423042	-2.5285	0.0114551	0.0411268	-0.103464	0.41959	-0.246583	0.805231	0.896691	0.216423	0.419954	0.515349	0.606309	0.76666	-0.337934	0.422595	-0.799665	0.423905	1	-0.4659
Adgre5	ENSRNOG00000004489	adhesion G protein-coupled receptor E5 [Source:RGD Symbol;Acc:1305595]	69.8067	-0.363655	0.399918	-0.909322	0.36318	0.619727	0.0898545	0.399847	0.224722	0.822195	0.910179	-0.358452	0.399973	-0.896191	0.370151	0.608638	0.0846521	0.399902	0.211682	0.832355	0.944897	-0.311118	0.400165	-0.777474	0.436879	0.610484	-0.330769	0.400073	-0.826772	0.408366	0.620241	-0.522142	0.400126	-1.30494	0.191912	0.347721	0.0389716	0.400262	0.0973654	0.922436	0.960748	0.00607179	0.399806	0.0151868	0.987883	1	-0.0700477
Adgrf3	ENSRNOG00000024766	adhesion G protein-coupled receptor F3 [Source:RGD Symbol;Acc:1305868]	1.87475	0	0.169787	0	1	NA	0	0.169884	0	1	NA	0	0.169929	0	1	NA	0	0.170026	0	1	NA	-0.0108246	0.17046	-0.0635023	0.949367	NA	-0.0802338	0.170419	-0.470804	0.637781	NA	-0.252057	0.170536	-1.47803	0.1394	NA	0	0.170504	0	1	NA	0.0808978	0.170933	0.473273	0.636019	1	0.0694543
Adgrf5	ENSRNOG00000011154	adhesion G protein-coupled receptor F5 [Source:RGD Symbol;Acc:621679]	53.2388	0.709748	0.455465	1.55829	0.119164	0.320278	-0.594282	0.455648	-1.30426	0.192146	0.369731	0.965286	0.455669	2.11839	0.034142	0.126178	-0.849821	0.455853	-1.86424	0.0622873	0.204688	-0.142913	0.455707	-0.313607	0.753819	0.857968	-0.0216521	0.456311	-0.0474503	0.962154	0.983702	0.404993	0.456342	0.887478	0.374821	0.55718	-0.690161	0.455815	-1.51413	0.129994	0.278538	0.0408943	0.455054	0.0898669	0.928393	1	0.468125
Adgrg1	ENSRNOG00000014963	adhesion G protein-coupled receptor G1 [Source:RGD Symbol;Acc:628617]	4936.97	-0.230564	0.160427	-1.43719	0.150664	0.37429	-0.497432	0.160686	-3.09567	0.00196369	0.00973251	-0.919309	0.160692	-5.72094	1.05936e-08	3.27957e-07	0.191313	0.160951	1.18864	0.234581	0.482561	0.491278	0.160881	3.05367	0.00226064	0.00882921	0.259127	0.160405	1.61546	0.106211	0.243632	0.499178	0.161191	3.09681	0.00195613	0.00771224	0.491189	0.160272	3.06473	0.00217869	0.0101122	0.00149722	0.161098	0.00929383	0.992585	1	0.729349
Adgrg2	ENSRNOG00000032472	adhesion G protein-coupled receptor G2 [Source:RGD Symbol;Acc:628618]	69.5873	-0.129059	0.439213	-0.293843	0.768878	0.897401	-0.828895	0.438778	-1.8891	0.0588786	0.156756	-0.742939	0.438976	-1.69244	0.0905629	0.248316	-0.215015	0.438541	-0.490296	0.623924	0.832849	-0.352216	0.438807	-0.802667	0.422167	0.597588	0.233877	0.439279	0.53241	0.594442	0.765933	-0.0786646	0.438853	-0.179251	0.857741	0.929552	0.403078	0.439372	0.917394	0.358936	0.560407	0.0386482	0.433434	0.0891674	0.928949	1	0.232787
Adgrg5	ENSRNOG00000039891	adhesion G protein-coupled receptor G5 [Source:RGD Symbol;Acc:1305559]	1.48914	0	0.16849	0	1	NA	0	0.16862	0	1	NA	0	0.168681	0	1	NA	0	0.168811	0	1	NA	0	0.169383	0	1	NA	0	0.169253	0	1	NA	-0.339504	0.169592	-2.00189	0.0452965	NA	0	0.169457	0	1	NA	0	0.170017	0	1	1	0
Adgrl1	ENSRNOG00000029134	adhesion G protein-coupled receptor L1 [Source:RGD Symbol;Acc:620768]	14728.9	0.218787	0.0933259	2.34433	0.0190611	0.0840399	0.125209	0.0932442	1.3428	0.179336	0.352529	0.291761	0.0932909	3.12743	0.0017634	0.0126436	0.0522345	0.0932092	0.560401	0.575206	0.800372	2.13965	0.0937337	22.8269	2.47804e-115	6.34532e-113	1.99506	0.0937466	21.2814	1.68758e-100	2.47505e-97	1.99888	0.0937833	21.3138	8.45069e-101	3.66264e-98	1.8209	0.0937333	19.4264	4.61749e-84	1.28989e-81	0.044625	0.0942063	0.473694	0.635718	1	0.0193823
Adgrl2	ENSRNOG00000032660	adhesion G protein-coupled receptor L2 [Source:RGD Symbol;Acc:620835]	1665.24	0.583445	0.254591	2.2917	0.0219232	0.0932876	-0.69729	0.254613	-2.73863	0.00616961	0.025635	-0.164302	0.25496	-0.644423	0.519301	0.734986	0.0504576	0.254982	0.197887	0.843133	0.950254	0.448527	0.254959	1.75921	0.0785418	0.175404	0.985794	0.254487	3.87365	0.000107218	0.000705942	0.321627	0.255052	1.26102	0.2073	0.368173	0.407148	0.254721	1.59841	0.109952	0.246408	0.00479356	0.256465	0.0186909	0.985088	1	0.159818
Adgrl3	ENSRNOG00000030149	adhesion G protein-coupled receptor L3 [Source:RGD Symbol;Acc:620836]	1758.02	-0.0420356	0.195691	-0.214806	0.829918	0.926333	-0.976825	0.196584	-4.96899	6.73012e-07	7.40078e-06	-0.822061	0.196285	-4.1881	2.81303e-05	0.000385152	-0.196799	0.197175	-0.998092	0.318235	0.577852	0.0302409	0.196965	0.153535	0.877977	0.932044	0.764734	0.195874	3.90423	9.45275e-05	0.00062945	0.273966	0.196937	1.39113	0.164185	0.310275	0.913423	0.195791	4.66531	3.08156e-06	2.6823e-05	0.106502	0.199136	0.534818	0.592775	1	0.241986
Adgrl4	ENSRNOG00000033940	adhesion G protein-coupled receptor L4 [Source:RGD Symbol;Acc:621136]	39.9828	-0.320679	0.332428	-0.964657	0.334717	NA	-0.133409	0.332292	-0.401483	0.688065	0.829174	-0.489853	0.332408	-1.47365	0.140575	0.33393	0.035765	0.332272	0.107638	0.914283	0.980765	-0.232863	0.332505	-0.70033	0.483721	0.653783	-0.0174851	0.332504	-0.0525863	0.958062	0.981594	-0.170767	0.33242	-0.51371	0.607455	0.754859	0.209233	0.33269	0.628912	0.529406	0.708786	-0.0897817	0.326179	-0.275253	0.783122	1	-0.0782982
Adh1	NA	NA	21.081	-0.00569125	0.318706	-0.0178574	0.985753	NA	0.637238	0.319165	1.99658	0.0458713	0.130178	-0.0130755	0.318796	-0.0410154	0.967284	0.997274	0.644622	0.319256	2.01914	0.0434726	0.159163	0.460017	0.319641	1.43917	0.150103	0.288698	-0.0574514	0.319113	-0.180035	0.857125	NA	-0.300149	0.31922	-0.940256	0.347086	0.529263	-0.210808	0.319288	-0.660243	0.509098	NA	-0.146661	0.309924	-0.473218	0.636058	1	-0.110235
Adh4	ENSRNOG00000046357	alcohol dehydrogenase 4 (class II), pi polypeptide [Source:RGD Symbol;Acc:71028]	2.74553	0	0.210745	0	1	NA	0	0.210869	0	1	NA	0	0.210926	0	1	NA	0	0.21105	0	1	NA	-0.0842283	0.211683	-0.397899	0.690705	NA	-0.240051	0.211706	-1.13389	0.256842	NA	-0.172988	0.211618	-0.817453	0.41367	NA	-0.0484482	0.211709	-0.228844	0.81899	NA	0.131635	0.176489	0.745854	0.455756	1	0.10795
Adh5	NA	NA	3526.17	-0.013404	0.277284	-0.0483403	0.961445	0.981908	-0.690098	0.277494	-2.48689	0.0128865	0.0473322	-0.453541	0.277384	-1.63507	0.102035	0.269372	-0.249961	0.277593	-0.900455	0.367878	0.626709	-0.61568	0.277382	-2.21961	0.026445	0.0728617	0.0873158	0.277178	0.315017	0.752749	0.86801	-0.157239	0.277367	-0.566899	0.570783	0.726719	0.116686	0.277142	0.421035	0.67373	0.814087	0.0159686	0.276664	0.0577184	0.953973	1	-0.0129
Adh6	ENSRNOG00000012436	alcohol dehydrogenase 6 (class V) [Source:RGD Symbol;Acc:1306313]	1.60659	-0.0919109	0.179325	-0.512538	0.608274	NA	0	0.179311	0	1	NA	-0.0921192	0.179507	-0.513179	0.607826	NA	0	0.179493	0	1	NA	-0.0257751	0.180067	-0.143142	0.886178	NA	-0.0625875	0.179981	-0.347746	0.728031	NA	-0.0427625	0.179915	-0.237682	0.812128	NA	-0.0691039	0.180396	-0.383068	0.70167	NA	-0.0878827	0.17084	-0.514415	0.606962	1	0.0327468
Adh7	ENSRNOG00000032959	alcohol dehydrogenase 7 (class IV), mu or sigma polypeptide [Source:RGD Symbol;Acc:621638]	14.8832	-0.567627	0.228979	-2.47895	0.0131771	NA	0	0.228799	0	1	1	-0.567714	0.229033	-2.47874	0.0131848	0.0619351	0	0.228854	0	1	1	-0.0653378	0.229035	-0.285275	0.775434	NA	0	0.228977	0	1	NA	-0.0216847	0.228971	-0.094705	0.924549	0.967179	0.568062	0.229251	2.47791	0.0132155	NA	0	0.187995	0	1	1	-0.0384971
Adhfe1	ENSRNOG00000007069	alcohol dehydrogenase, iron containing, 1 [Source:RGD Symbol;Acc:1308863]	1731.77	0.0525975	0.239832	0.21931	0.826409	0.924659	0.052	0.239664	0.21697	0.828232	0.913663	0.102027	0.239682	0.425675	0.670345	0.839952	0.00257083	0.239514	0.0107335	0.991436	1	-0.361071	0.239004	-1.51073	0.130857	0.259832	-0.146771	0.239267	-0.613419	0.539599	0.72738	-0.451612	0.239035	-1.88932	0.0588495	0.139142	-0.337126	0.239144	-1.40972	0.158623	0.321258	-0.137587	0.240663	-0.571699	0.567526	1	-0.26597
Adi1	ENSRNOG00000008950	acireductone dioxygenase 1 [Source:RGD Symbol;Acc:727828]	2324.86	-0.233733	0.230358	-1.01465	0.310273	0.570688	-0.311229	0.230642	-1.3494	0.177208	0.349275	-0.371119	0.230369	-1.61098	0.107185	0.278861	-0.173843	0.230653	-0.753701	0.451029	0.699857	-0.0897229	0.230459	-0.389322	0.697038	0.819679	0.0293164	0.230218	0.127342	0.89867	0.951686	-0.111803	0.230319	-0.485424	0.627376	0.768882	0.313888	0.230029	1.36456	0.172391	0.340868	0.0507984	0.231258	0.219661	0.826135	1	0.192035
Adipoq	ENSRNOG00000001821	adiponectin, C1Q and collagen domain containing [Source:RGD Symbol;Acc:628748]	8.4802	-0.0119971	0.279328	-0.0429499	0.965742	NA	0	0.279418	0	1	NA	-0.0123411	0.279483	-0.044157	0.964779	NA	0	0.279573	0	1	NA	-0.262268	0.280258	-0.935811	0.34937	NA	-0.0944862	0.280012	-0.337437	0.735788	NA	-0.146276	0.280031	-0.522357	0.601421	NA	-0.510499	0.280468	-1.82017	0.0687337	NA	-0.327063	0.245957	-1.32975	0.183599	1	-0.123477
Adipor1	ENSRNOG00000004143	adiponectin receptor 1 [Source:RGD Symbol;Acc:1303151]	5085.12	-0.237862	0.187145	-1.271	0.203727	0.445447	0.357531	0.187053	1.91139	0.0559543	0.150856	-0.295994	0.187109	-1.58193	0.113665	0.290378	0.415663	0.187017	2.22259	0.0262431	0.110837	-0.519114	0.186521	-2.78314	0.00538359	0.0189164	-0.884145	0.186745	-4.7345	2.19599e-06	2.01639e-05	-0.904263	0.186765	-4.84171	1.28725e-06	9.67092e-06	-0.643736	0.186574	-3.4503	0.000559969	0.00305882	0.00254607	0.186487	0.0136528	0.989107	1	0.00749818
Adipor2	ENSRNOG00000007990	adiponectin receptor 2 [Source:RGD Symbol;Acc:1307891]	400.369	0.776897	0.362489	2.14323	0.0320944	0.124498	0.0970824	0.360697	0.269152	0.787813	0.888633	-0.498425	0.36514	-1.36502	0.172246	0.37955	1.3724	0.363368	3.7769	0.000158791	0.00203379	-0.112904	0.359786	-0.313807	0.753667	0.857887	-0.0935315	0.360156	-0.259697	0.795098	0.893742	-1.77779	0.362649	-4.90224	9.47488e-07	7.2439e-06	-0.88183	0.361511	-2.43929	0.0147162	0.0512974	-0.0113393	0.363859	-0.031164	0.975139	1	-0.11582
Adk	ENSRNOG00000012325	adenosine kinase [Source:RGD Symbol;Acc:2046]	3552.76	0.182517	0.198353	0.920161	0.357488	0.615374	-0.400031	0.198428	-2.016	0.0438001	0.125233	-0.268556	0.19853	-1.35272	0.176146	0.385307	0.0510414	0.198606	0.256999	0.79718	0.926091	-0.555254	0.198162	-2.80202	0.00507831	0.0179464	0.157632	0.198096	0.795733	0.426187	0.63619	-0.361021	0.198324	-1.82036	0.0687048	0.157353	-0.0716854	0.19811	-0.361847	0.717467	0.844012	-0.0467799	0.198754	-0.235366	0.813925	1	-0.312717
Adm	ENSRNOG00000027030	adrenomedullin [Source:RGD Symbol;Acc:2047]	89.3634	0.844406	0.501983	1.68214	0.0925414	0.269763	0.461709	0.50241	0.91899	0.358101	0.561526	-0.311049	0.501566	-0.620157	0.535154	0.745303	1.61716	0.501995	3.22147	0.00127533	0.0110321	0.277056	0.502563	0.551287	0.581437	0.734322	0.215765	0.502371	0.429494	0.667564	0.814283	-1.10674	0.501949	-2.20489	0.027462	0.0753647	-0.655092	0.502105	-1.30469	0.191998	0.367184	-0.0261635	0.501505	-0.05217	0.958393	1	-0.396621
Adnp	ENSRNOG00000010975	activity-dependent neuroprotector homeobox [Source:RGD Symbol;Acc:71030]	5595.56	-0.00672112	0.173771	-0.0386782	0.969147	0.985974	-0.0680141	0.173768	-0.391407	0.695497	0.833018	-0.0803886	0.173758	-0.462648	0.643617	0.824311	0.00565333	0.173755	0.0325362	0.974044	1	1.14004	0.174004	6.55182	5.68392e-11	6.9931e-10	1.21917	0.174004	7.00655	2.44267e-12	4.98432e-11	1.02349	0.174028	5.88121	4.07288e-09	4.1384e-08	1.23321	0.173935	7.09007	1.34043e-12	2.33351e-11	0.00731848	0.174495	0.0419408	0.966546	1	-0.0111097
Adnp2	ENSRNOG00000053370	ADNP homeobox 2 [Source:RGD Symbol;Acc:1308279]	546.027	0.580422	0.450688	1.28786	0.197796	0.43825	-0.964783	0.450836	-2.13998	0.032356	0.0988052	-0.0387153	0.450868	-0.0858684	0.931571	0.982127	-0.345646	0.451016	-0.766372	0.443455	0.693948	-0.320844	0.450866	-0.711617	0.476702	0.647348	0.471536	0.45045	1.04681	0.295187	0.501583	-0.0573656	0.450721	-0.127275	0.898723	0.952901	0.211315	0.450705	0.468854	0.639174	0.790324	0.319492	0.451023	0.708372	0.478715	1	0.172033
Ado	NA	NA	11.7148	-0.120568	0.44548	-0.270648	0.786662	NA	0.411457	0.446435	0.92165	0.356711	0.560088	-0.142563	0.445783	-0.319805	0.749116	0.886566	0.433452	0.446738	0.970261	0.331916	0.591467	-0.0977125	0.448845	-0.217697	0.827665	NA	0.127415	0.446294	0.285495	0.775265	NA	-0.13455	0.446683	-0.301221	0.763246	0.870423	0.0144117	0.447531	0.0322026	0.97431	NA	-0.223428	0.442693	-0.504701	0.613769	1	-0.61322
Adora1	ENSRNOG00000003442	adenosine A1 receptor [Source:RGD Symbol;Acc:2048]	751.725	1.15219	0.439387	2.62227	0.00873466	0.0459392	-0.636838	0.43886	-1.45112	0.146747	0.304375	0.912441	0.439448	2.07633	0.0378631	0.136401	-0.397089	0.438922	-0.904693	0.365628	0.624654	-1.62989	0.438386	-3.71793	0.00020086	0.00101847	-0.435829	0.438175	-0.994644	0.319909	0.529781	-1.21244	0.438164	-2.76709	0.00565597	0.0195034	-1.81958	0.438939	-4.14541	3.39199e-05	0.000246191	-0.231345	0.437941	-0.528255	0.597322	1	-0.55672
Adora2a	ENSRNOG00000001302	adenosine A2a receptor [Source:RGD Symbol;Acc:2049]	3328.59	0.146966	0.215927	0.680629	0.496106	0.736047	-2.7721	0.218159	-12.7068	5.4212e-37	6.09716e-35	-2.49775	0.217949	-11.4602	2.08912e-30	6.73285e-28	-0.127392	0.220159	-0.578636	0.562835	0.792014	-0.413824	0.219216	-1.88775	0.05906	0.139839	-0.0628194	0.215733	-0.29119	0.770906	0.8784	-0.240594	0.219204	-1.09758	0.272389	0.446137	-0.116812	0.21576	-0.541395	0.588235	0.754948	0.0929374	0.216312	0.429646	0.667453	1	2.42007
Adora2b	ENSRNOG00000002922	adenosine A2B receptor [Source:RGD Symbol;Acc:2050]	244.475	-0.551905	0.503345	-1.09647	0.272871	0.529631	0.872584	0.503295	1.73374	0.0829636	0.202716	-0.873658	0.50339	-1.73555	0.0826433	0.234842	1.19434	0.503339	2.37283	0.0176525	0.0836001	0.238968	0.503123	0.474969	0.634809	0.773174	-0.470681	0.503286	-0.935215	0.349677	0.562275	-0.574229	0.503382	-1.14074	0.253976	0.425744	0.0830382	0.503171	0.16503	0.868921	0.933084	0.00180756	0.503125	0.00359266	0.997133	1	-0.162327
Adpgk	ENSRNOG00000026178	ADP-dependent glucokinase [Source:RGD Symbol;Acc:1306103]	2130.43	0.0302803	0.213438	0.141869	0.887184	0.95308	-0.21457	0.21352	-1.00492	0.314937	0.515892	-0.760563	0.2141	-3.55238	0.000381759	0.0036132	0.576273	0.214181	2.69059	0.00713263	0.0428537	-0.20798	0.213168	-0.975661	0.329232	0.504878	-0.292288	0.212922	-1.37275	0.169831	0.345702	-0.934787	0.213753	-4.3732	1.22436e-05	7.8918e-05	-0.12361	0.212947	-0.580474	0.561595	0.733328	0.198757	0.214442	0.926858	0.354	1	0.298575
Adprh	ENSRNOG00000027260	ADP-ribosylarginine hydrolase [Source:RGD Symbol;Acc:2052]	4205.21	0.639411	0.172841	3.69941	0.000216098	0.0021829	-0.39977	0.172655	-2.31543	0.0205893	0.0691389	-0.0929887	0.173162	-0.537004	0.591265	0.786164	0.33263	0.172976	1.92298	0.0544823	0.186196	-0.342664	0.172479	-1.9867	0.0469552	0.116358	0.280913	0.172402	1.62941	0.103227	0.238417	-0.350537	0.172839	-2.02811	0.0425492	0.107606	-0.255333	0.172709	-1.4784	0.1393	0.292531	0.103123	0.173257	0.595203	0.551708	1	-0.223718
Adprhl1	ENSRNOG00000062013	ADP-ribosylhydrolase like 1 [Source:MGI Symbol;Acc:MGI:2442168]	103.502	-0.0380932	0.471697	-0.0807579	0.935635	0.971914	-0.117737	0.471667	-0.249619	0.802882	0.898692	0.700487	0.471966	1.48419	0.137759	0.329181	-0.856317	0.471936	-1.81448	0.0696044	0.221427	-0.507287	0.471954	-1.07487	0.282435	0.455744	0.00999598	0.471869	0.0211838	0.983099	0.994371	0.281716	0.472205	0.596596	0.550777	0.711043	0.120077	0.471916	0.254445	0.799152	0.892636	0.0715982	0.471266	0.151927	0.879244	1	-0.397822
Adprhl2	ENSRNOG00000010849	ADP-ribosylhydrolase like 2 [Source:RGD Symbol;Acc:1309068]	4004.1	0.301027	0.124184	2.42404	0.015349	0.0712699	-0.441365	0.12423	-3.5528	0.000381158	0.00236465	0.281406	0.124121	2.2672	0.023378	0.0949396	-0.421744	0.124167	-3.39659	0.000682302	0.00665827	0.018884	0.124174	0.152078	0.879126	0.932781	0.636147	0.124019	5.12941	2.90651e-07	3.08058e-06	0.41555	0.123957	3.35237	0.000801232	0.00350528	0.335184	0.12412	2.70048	0.00692389	0.0272956	6.5003e-05	0.126266	0.000514811	0.999589	1	-0.175788
Adprm	ENSRNOG00000003397	ADP-ribose/CDP-alcohol diphosphatase, manganese-dependent [Source:RGD Symbol;Acc:1309906]	949.181	0.437776	0.409589	1.06882	0.285152	0.545048	-0.504412	0.40958	-1.23153	0.218123	0.402405	0.434441	0.40954	1.0608	0.288779	0.525581	-0.501077	0.40953	-1.22354	0.221126	0.464615	-0.760669	0.409306	-1.85843	0.0631073	0.147603	-0.580227	0.409023	-1.41857	0.156025	0.323721	-0.299396	0.409088	-0.731863	0.464252	0.640084	-0.299712	0.409372	-0.732126	0.464092	0.658709	0.717658	0.40911	1.7542	0.0793969	1	0.3237
Adra1a	ENSRNOG00000009522	adrenoceptor alpha 1A [Source:RGD Symbol;Acc:2055]	13.2258	-0.0356987	0.334743	-0.106645	0.91507	NA	0	0.334811	0	1	1	0.658671	0.335714	1.962	0.0497624	0.165515	-0.694887	0.335782	-2.06946	0.0385031	0.145373	-0.253086	0.335771	-0.753746	0.451002	NA	-0.284858	0.335671	-0.848621	0.396092	NA	0.560814	0.336298	1.66761	0.095393	0.204328	-0.195948	0.335845	-0.583448	0.559592	NA	0.0458662	0.316365	0.144979	0.884728	1	0.0278889
Adra1b	ENSRNOG00000060087	adrenoceptor alpha 1B [Source:RGD Symbol;Acc:2054]	248.351	0.064564	0.420955	0.153375	0.878103	0.950096	1.43262	0.418717	3.42145	0.000622887	0.00364143	1.01835	0.419244	2.42903	0.0151394	0.0686956	0.478829	0.416988	1.1483	0.250844	0.502718	0.857812	0.416934	2.05743	0.0396448	0.101983	-0.245612	0.419441	-0.58557	0.558164	0.741224	0.0591224	0.417219	0.141706	0.887312	0.946747	0.0648438	0.419839	0.154449	0.877256	0.937715	0.371452	0.422531	0.879111	0.379341	1	-0.326392
Adra1d	ENSRNOG00000021256	adrenoceptor alpha 1D [Source:RGD Symbol;Acc:62064]	1249.79	-0.4081	0.278924	-1.46312	0.143434	0.361567	2.25308	0.276626	8.14484	3.79771e-16	1.13381e-14	1.7136	0.275608	6.21753	5.05049e-10	2.01523e-08	0.131381	0.273276	0.480761	0.630686	0.836637	-0.199834	0.272902	-0.732253	0.464014	0.636156	-0.391376	0.277951	-1.40808	0.159109	0.328204	-0.327717	0.273042	-1.20024	0.230045	0.396583	-0.17799	0.276407	-0.64394	0.519614	0.701068	-0.194326	0.27787	-0.699342	0.484339	1	-2.0578
Adra2a	ENSRNOG00000047545	adrenoceptor alpha 2A [Source:RGD Symbol;Acc:2056]	785.261	-0.0247205	0.261022	-0.0947064	0.924548	0.966557	-0.625614	0.261945	-2.38834	0.0169247	0.0588943	-0.0651414	0.260915	-0.249665	0.802846	0.916778	-0.585193	0.261838	-2.23494	0.0254212	0.108606	0.0608791	0.262142	0.232237	0.816354	0.897398	-0.0516334	0.260378	-0.198302	0.842809	0.921763	0.574955	0.26133	2.20011	0.0277992	0.076157	0.0132011	0.260214	0.0507315	0.959539	0.979934	0.0399871	0.264533	0.151161	0.879848	1	0.735692
Adra2b	ENSRNOG00000013887	adrenoceptor alpha 2B [Source:RGD Symbol;Acc:2057]	69.3714	0.406923	0.471729	0.86262	0.388346	0.646398	-0.429911	0.47176	-0.911292	0.362142	0.565756	-0.463591	0.471323	-0.983595	0.325315	0.563926	0.440603	0.471355	0.934758	0.349913	0.609127	-0.349562	0.471926	-0.740715	0.458866	0.631359	0.504605	0.471942	1.06921	0.284975	0.491129	0.0363468	0.471243	0.0771297	0.93852	0.974028	-0.241884	0.471924	-0.512548	0.608267	0.767571	-0.336516	0.470673	-0.714968	0.474629	1	-0.420575
Adra2c	ENSRNOG00000009299	adrenoceptor alpha 2C [Source:RGD Symbol;Acc:2058]	1847.17	0.883019	0.202332	4.36421	1.27586e-05	0.000178449	-1.75008	0.203656	-8.59332	8.44953e-18	2.9017e-16	-0.394296	0.203579	-1.93683	0.0527667	0.172221	-0.472765	0.204894	-2.30737	0.0210345	0.0951144	-1.00456	0.203803	-4.92909	8.26154e-07	6.3703e-06	-0.120243	0.201106	-0.597906	0.549903	0.73502	-0.65284	0.202941	-3.2169	0.00129583	0.00537355	-1.01109	0.201871	-5.00859	5.48293e-07	5.30708e-06	-0.00782073	0.203476	-0.0384357	0.96934	1	0.864641
Adrb1	ENSRNOG00000017002	adrenoceptor beta 1 [Source:RGD Symbol;Acc:2059]	691.363	-0.0275981	0.382766	-0.0721018	0.942521	0.974156	-0.575832	0.38339	-1.50195	0.13311	0.284438	-0.246359	0.382871	-0.643453	0.51993	0.735398	-0.357071	0.383495	-0.931096	0.351804	0.611492	-1.80889	0.382324	-4.73129	2.23093e-06	1.59885e-05	-0.134493	0.382229	-0.351864	0.72494	0.850132	-1.39326	0.381931	-3.64794	0.000264346	0.00130042	-0.525328	0.381876	-1.37565	0.16893	0.336013	-0.41736	0.383014	-1.08967	0.275857	1	-1.09595
Adrb2	ENSRNOG00000019217	adrenoceptor beta 2, surface [Source:RGD Symbol;Acc:2060]	181.119	0.768709	0.505418	1.52094	0.128275	0.336472	-1.48647	0.505537	-2.94038	0.00327814	0.0150211	-0.77775	0.505637	-1.53816	0.12401	0.307008	0.059991	0.505755	0.118617	0.905579	0.977403	-1.01017	0.50553	-1.99823	0.0456916	0.114006	0.740305	0.505343	1.46496	0.142933	0.303755	-0.943905	0.50557	-1.86701	0.0618999	0.144721	-0.000805756	0.505421	-0.00159423	0.998728	0.999893	0.0274175	0.505389	0.0542503	0.956736	1	-0.262421
Adrb3	ENSRNOG00000012674	adrenoceptor beta 3 [Source:RGD Symbol;Acc:2061]	7.97294	0.223055	0.229034	0.973894	0.330109	NA	-0.223143	0.229089	-0.974046	0.330034	NA	0	0.22897	0	1	NA	0	0.229025	0	1	NA	-0.242014	0.229373	-1.05511	0.291375	NA	0.137456	0.229394	0.599212	0.549031	NA	-0.0464934	0.229213	-0.202839	0.839261	NA	-0.0577372	0.229319	-0.251776	0.801214	NA	0.0216155	0.205076	0.105403	0.916056	1	-0.124322
Adrbk1	ENSRNOG00000018985	adrenergic, beta, receptor kinase 1 [Source:RGD Symbol;Acc:2062]	3511.1	0.266598	0.158429	1.68276	0.0924219	0.269593	-0.938781	0.159062	-5.902	3.59131e-09	5.51823e-08	0.19387	0.158394	1.22397	0.220964	0.444866	-0.866053	0.159027	-5.44594	5.15314e-08	1.85356e-06	-1.39255	0.15853	-8.78417	1.57519e-18	3.29824e-17	-0.132757	0.157817	-0.84121	0.400231	0.612483	-0.42204	0.157776	-2.67493	0.00747438	0.0247877	-0.576332	0.157879	-3.65047	0.000261758	0.00155579	-0.176868	0.159057	-1.11198	0.266148	1	-0.320816
Adrbk2	ENSRNOG00000059456	adrenergic, beta, receptor kinase 2 [Source:RGD Symbol;Acc:2063]	223.876	0.317511	0.494149	0.64254	0.520523	0.751997	-0.307668	0.494108	-0.622673	0.5335	0.717832	0.203311	0.494147	0.411438	0.680752	0.84529	-0.193467	0.494106	-0.391551	0.69539	0.876535	-0.351968	0.493922	-0.712599	0.476094	0.647094	-0.269804	0.493779	-0.546407	0.584786	0.759581	-0.462543	0.493804	-0.936693	0.348917	0.531149	-0.876254	0.49382	-1.77444	0.0759903	0.18678	-0.287507	0.49403	-0.581962	0.560592	1	0.224237
Adrm1	ENSRNOG00000055984	adhesion regulating molecule 1 [Source:RGD Symbol;Acc:69248]	4361.65	-0.207489	0.179693	-1.15469	0.248219	0.502407	-0.11384	0.179813	-0.633102	0.526667	0.712677	-0.673656	0.179906	-3.7445	0.000180756	0.00191079	0.352327	0.180026	1.95709	0.0503368	0.176628	-0.446056	0.179453	-2.48564	0.0129319	0.0400267	-0.360803	0.179431	-2.01082	0.0443449	0.124652	-0.753521	0.179731	-4.1925	2.75898e-05	0.00016608	-0.218967	0.179257	-1.22153	0.221886	0.405924	-0.0656309	0.179765	-0.365093	0.715042	1	0.0285772
Adsl	ENSRNOG00000018655	adenylosuccinate lyase [Source:RGD Symbol;Acc:1307617]	3047.67	0.27282	0.162592	1.67794	0.0933588	0.271522	-0.263282	0.162501	-1.62018	0.105193	0.240047	-0.0187501	0.162748	-0.11521	0.908279	0.971043	0.0282882	0.162657	0.173914	0.861933	0.956613	-0.711817	0.161882	-4.39714	1.09688e-05	6.99909e-05	-0.422096	0.161736	-2.60978	0.0090601	0.0335021	-0.570209	0.16206	-3.5185	0.000433997	0.00202409	-0.577902	0.161954	-3.5683	0.000359305	0.00206407	0.116926	0.163221	0.71637	0.473763	1	-0.0264213
Adss	ENSRNOG00000004481	adenylosuccinate synthase [Source:RGD Symbol;Acc:1310508]	2456.81	0.684989	0.24466	2.79976	0.00511409	0.0302905	-0.0344847	0.24416	-0.141238	0.887682	0.948587	0.707033	0.244586	2.89074	0.00384339	0.0234844	-0.056528	0.244086	-0.231591	0.816856	0.937545	0.0203432	0.243929	0.0833979	0.933535	0.964776	-0.203066	0.243864	-0.8327	0.405014	0.616925	-0.023108	0.243921	-0.0947357	0.924525	0.967179	-0.761702	0.244317	-3.11767	0.00182285	0.00866142	0.126273	0.244497	0.51646	0.605533	1	0.257728
Adtrp	ENSRNOG00000014481	androgen-dependent TFPI-regulating protein [Source:RGD Symbol;Acc:1305679]	74.0699	0.129025	0.465109	0.277408	0.781467	0.903674	-0.0178164	0.465199	-0.0382984	0.96945	0.989468	0.349993	0.46525	0.752268	0.45189	0.681209	-0.238784	0.465341	-0.513138	0.607854	0.821695	-0.078679	0.465431	-0.169045	0.865761	0.925069	-0.0526611	0.465399	-0.113153	0.90991	0.957658	0.312369	0.465423	0.671149	0.502126	0.672264	-0.102561	0.46537	-0.220386	0.825571	0.909167	0.0785314	0.464374	0.169112	0.865708	1	-0.00814233
Aebp1	ENSRNOG00000013720	AE binding protein 1 [Source:RGD Symbol;Acc:1306922]	1019.34	0.124138	0.292825	0.423934	0.671614	0.846056	-0.548169	0.293086	-1.87034	0.0614369	0.161346	-0.34642	0.293076	-1.18202	0.237199	0.465182	-0.0776108	0.293336	-0.26458	0.791333	0.923516	0.654832	0.293606	2.2303	0.0257272	0.0711712	1.4154	0.293468	4.823	1.41415e-06	1.33271e-05	0.576854	0.293543	1.96514	0.0493977	0.121218	1.06162	0.293157	3.62133	0.000293093	0.00171738	-0.229108	0.296391	-0.772992	0.439527	1	-0.211908
Aebp2	ENSRNOG00000008929	AE binding protein 2 [Source:RGD Symbol;Acc:1307233]	384.13	-0.0463789	0.374589	-0.123813	0.901464	0.958283	0.254998	0.374029	0.681759	0.495391	0.687715	0.573477	0.373294	1.53626	0.124475	0.307916	-0.364858	0.372731	-0.978877	0.327641	0.587422	-0.712374	0.371914	-1.91542	0.0554383	0.132915	-0.913129	0.372649	-2.45037	0.0142708	0.0494944	-0.102452	0.37171	-0.275624	0.782837	0.881673	-0.903223	0.372351	-2.42573	0.0152777	0.0528864	-0.0362744	0.374802	-0.0967827	0.922899	1	-0.0539501
Aen	ENSRNOG00000018421	apoptosis enhancing nuclease [Source:RGD Symbol;Acc:1305051]	689.722	-0.160254	0.351584	-0.455805	0.648531	0.831812	-0.328481	0.351929	-0.933372	0.350628	0.553884	-0.84607	0.352162	-2.40251	0.0162831	0.0724727	0.357336	0.352506	1.0137	0.310725	0.570645	-0.0899235	0.351695	-0.255686	0.798193	0.886793	0.00481772	0.351328	0.0137129	0.989059	0.996961	-0.195629	0.3524	-0.555132	0.578804	0.73307	0.448298	0.35126	1.27626	0.201864	0.37995	0.28239	0.353515	0.798807	0.424402	1	0.233051
Aes	ENSRNOG00000052025	amino-terminal enhancer of split [Source:RGD Symbol;Acc:2731]	50290.8	0.183586	0.061237	2.99796	0.00271792	0.0184006	-0.244856	0.0612335	-3.99873	6.36836e-05	0.000475038	0.134807	0.0612267	2.20176	0.0276821	0.10772	-0.196077	0.0612232	-3.20265	0.00136168	0.0116429	-0.527273	0.0611404	-8.62397	6.46697e-18	1.29035e-16	-0.221575	0.0611213	-3.62516	0.000288778	0.00172254	-0.285501	0.0611279	-4.67056	3.00382e-06	2.11869e-05	-0.383561	0.0611355	-6.27394	3.52017e-10	4.88271e-09	0.0216024	0.0601568	0.359101	0.719519	1	-0.0608482
Afap1	ENSRNOG00000060665	actin filament associated protein 1 [Source:RGD Symbol;Acc:619959]	572.785	-0.0187334	0.387643	-0.0483265	0.961456	0.981908	-0.625797	0.388077	-1.61256	0.106841	0.24283	0.167913	0.387462	0.433365	0.664749	0.836847	-0.812443	0.387897	-2.09448	0.0362171	0.139166	0.544519	0.388581	1.4013	0.161125	0.303739	0.826533	0.387843	2.1311	0.0330806	0.0979757	0.680485	0.387566	1.75579	0.079124	0.176019	1.43364	0.388205	3.69301	0.000221619	0.00134449	0.586128	0.390466	1.5011	0.13333	1	0.342514
Afap1l1	ENSRNOG00000019403	actin filament associated protein 1-like 1 [Source:RGD Symbol;Acc:1311580]	278.541	-0.356609	0.504811	-0.706421	0.479927	0.724266	0.627367	0.504774	1.24287	0.213917	0.397857	0.556356	0.504697	1.10235	0.270308	0.503855	-0.285597	0.50466	-0.56592	0.571448	0.798147	0.190438	0.504664	0.377357	0.705908	0.82571	0.189804	0.504809	0.375992	0.706923	0.840017	-0.017757	0.504615	-0.0351892	0.971929	0.991243	0.174865	0.504706	0.346468	0.728991	0.851008	-0.370194	0.504566	-0.733687	0.463139	1	-0.624622
Afap1l2	ENSRNOG00000017164	actin filament associated protein 1-like 2 [Source:RGD Symbol;Acc:1310668]	316.732	-0.0564895	0.423258	-0.133464	0.893827	0.955824	0.0362732	0.423189	0.0857139	0.931694	0.971008	-0.0840698	0.423152	-0.198675	0.842517	0.93946	0.0638534	0.423083	0.150924	0.880036	0.964693	-0.528177	0.422266	-1.25082	0.211001	0.370118	0.262129	0.423009	0.619677	0.53547	0.724144	-0.0100739	0.422863	-0.0238231	0.980994	0.995396	-0.287759	0.422352	-0.681323	0.495667	0.683227	-0.602582	0.425055	-1.41766	0.156291	1	-0.821568
Aff1	ENSRNOG00000002232	AF4/FMR2 family, member 1 [Source:RGD Symbol;Acc:1307940]	324.806	-0.62005	0.445024	-1.39329	0.163531	0.392879	1.22501	0.444538	2.75569	0.00585676	0.0245134	0.509184	0.443868	1.14715	0.251319	0.483076	0.0957771	0.443379	0.216017	0.828975	0.943358	0.706891	0.443493	1.59392	0.110955	0.229857	-0.217863	0.444891	-0.489698	0.624347	0.78591	0.0187511	0.443294	0.0422995	0.96626	0.988565	-0.00305462	0.443805	-0.00688279	0.994508	0.997038	-0.402774	0.445698	-0.903694	0.366158	1	-0.298398
Aff3	ENSRNOG00000018830	AF4/FMR2 family, member 3 [Source:RGD Symbol;Acc:1308527]	368.383	1.03801	0.400402	2.59243	0.00953019	0.0494646	-0.716139	0.399801	-1.79124	0.0732547	0.184406	0.977008	0.400352	2.44037	0.0146722	0.0670843	-0.655135	0.399751	-1.63886	0.101243	0.282014	-0.168104	0.399799	-0.42047	0.674142	0.803362	0.599795	0.399168	1.50261	0.132939	0.288374	0.623917	0.399393	1.56216	0.11825	0.241515	-0.284385	0.400415	-0.710225	0.477564	0.669136	0.152947	0.402481	0.380011	0.703937	1	-0.0514625
Aff4	ENSRNOG00000006965	AF4/FMR2 family, member 4 [Source:RGD Symbol;Acc:1311694]	8025.98	-0.513661	0.129737	-3.95926	7.51839e-05	0.0008578	0.414752	0.129741	3.19676	0.00138978	0.00726025	-0.266588	0.12961	-2.05684	0.0397014	0.141063	0.167679	0.129615	1.29367	0.195779	0.431105	0.940935	0.129732	7.25291	4.07915e-13	5.95449e-12	0.345067	0.129826	2.65792	0.00786241	0.029758	0.64566	0.129792	4.97457	6.53916e-07	5.14013e-06	0.937817	0.129627	7.23475	4.66395e-13	8.47554e-12	0.0790786	0.130136	0.60766	0.543413	1	0.181092
Afg3l1	ENSRNOG00000026994	AFG3(ATPase family gene 3)-like 1 (S. cerevisiae) [Source:RGD Symbol;Acc:1309722]	1224.89	0.30629	0.231115	1.32527	0.185081	0.421908	0.266979	0.230366	1.15893	0.246483	0.438	0.246401	0.231046	1.06646	0.286216	0.523038	0.326868	0.230296	1.41934	0.1558	0.373214	0.537359	0.230068	2.33566	0.019509	0.0566868	0.308965	0.230458	1.34066	0.180031	0.35997	-0.248998	0.230129	-1.08199	0.279256	0.45366	-0.0433993	0.230642	-0.188168	0.850745	0.921557	-0.0459803	0.233655	-0.196787	0.843994	1	-0.0385054
Afg3l2	ENSRNOG00000017965	AFG3-like AAA ATPase 2 [Source:RGD Symbol;Acc:1305259]	3533.68	0.0585362	0.182071	0.321503	0.74783	0.88626	0.0684811	0.181959	0.376354	0.706654	0.84066	0.420844	0.181842	2.31434	0.0206492	0.0864803	-0.293826	0.18173	-1.61683	0.105916	0.290922	0.169426	0.181744	0.932224	0.351221	0.527797	0.350966	0.181931	1.92912	0.0537164	0.145153	0.742716	0.181822	4.08486	4.41037e-05	0.000256401	0.413525	0.181935	2.27292	0.0230307	0.0736738	0.12103	0.183025	0.661274	0.508437	1	-0.249889
Afm	ENSRNOG00000002878	afamin [Source:RGD Symbol;Acc:628614]	3.48616	-0.225219	0.171616	-1.31234	0.189405	NA	0	0.171532	0	1	NA	-0.225302	0.171693	-1.31224	0.18944	NA	0	0.171609	0	1	NA	0	0.171837	0	1	NA	-0.0380588	0.171802	-0.221528	0.824681	NA	-0.0510785	0.17179	-0.297331	0.766214	NA	0.189929	0.172017	1.10413	0.269535	NA	0.00276595	0.171997	0.0160814	0.987169	1	0.0383392
Afmid	ENSRNOG00000050205	arylformamidase [Source:RGD Symbol;Acc:1591143]	472.925	0.914938	0.337174	2.71355	0.00665668	0.0371238	-0.718983	0.336701	-2.13538	0.0327302	0.0995818	0.292134	0.337781	0.864862	0.387114	0.623299	-0.0961787	0.337309	-0.285136	0.77554	0.917696	0.180364	0.337101	0.535044	0.59262	0.742096	0.56588	0.335909	1.68462	0.0920609	0.219009	0.400182	0.337354	1.18624	0.235528	0.403153	-0.237629	0.337114	-0.704893	0.480877	0.67174	0.110879	0.340591	0.32555	0.744765	1	0.331792
Afp	ENSRNOG00000002889	alpha-fetoprotein [Source:RGD Symbol;Acc:2065]	7.14731	0	0.263247	0	1	NA	0	0.263352	0	1	NA	0	0.2634	0	1	NA	0	0.263504	0	1	NA	-0.460257	0.26432	-1.74129	0.0816331	NA	-0.154734	0.263985	-0.586144	0.557779	NA	-0.00855431	0.263821	-0.0324247	0.974133	NA	-0.278453	0.26422	-1.05387	0.291944	NA	-0.081581	0.218183	-0.373912	0.70847	1	-0.208559
Aftph	ENSRNOG00000005411	aftiphilin [Source:RGD Symbol;Acc:1311920]	2565.71	-0.621173	0.203772	-3.04838	0.00230082	0.0160023	0.348208	0.203877	1.70793	0.0876485	0.21044	-0.436034	0.20355	-2.14215	0.0321817	0.120349	0.163069	0.203655	0.80071	0.423299	0.677764	0.427707	0.203553	2.10121	0.0356229	0.0933364	0.00462744	0.203806	0.0227051	0.981886	0.993971	-0.0812988	0.203549	-0.399407	0.689593	0.81738	0.544672	0.20327	2.67955	0.00737217	0.0287888	-0.0810634	0.204951	-0.395525	0.692456	1	0.0748117
Aga	ENSRNOG00000000108	aspartylglucosaminidase [Source:RGD Symbol;Acc:1309646]	953.335	-0.3692	0.287568	-1.28387	0.199187	0.439546	-0.150884	0.288063	-0.523788	0.600426	0.768052	-0.558716	0.287658	-1.94229	0.0521017	0.171006	0.0386314	0.288153	0.134066	0.893351	0.971798	-0.573953	0.28716	-1.99873	0.0456381	0.113919	-0.345548	0.287131	-1.20345	0.228803	0.424433	-0.659289	0.287276	-2.29497	0.0217349	0.0616951	0.0652704	0.286618	0.227726	0.819859	0.90566	0.041519	0.289262	0.143534	0.885868	1	-0.0773364
Agap1	ENSRNOG00000019476	ArfGAP with GTPase domain, ankyrin repeat and PH domain 1 [Source:RGD Symbol;Acc:1309244]	7394.51	0.402615	0.151385	2.65954	0.00782478	0.0422	-0.779395	0.151472	-5.14549	2.66826e-07	3.15498e-06	0.055725	0.151435	0.367979	0.712889	0.866048	-0.432505	0.151521	-2.85441	0.00431163	0.0291163	0.863123	0.151803	5.6858	1.30204e-08	1.27415e-07	1.33915	0.151499	8.83932	9.63071e-19	3.44504e-17	1.40082	0.151809	9.22752	2.76959e-20	6.97616e-19	0.884609	0.151521	5.83818	5.27742e-09	6.42925e-08	-0.0519181	0.151803	-0.342011	0.732343	1	0.303347
Agap2	ENSRNOG00000025584	ArfGAP with GTPase domain, ankyrin repeat and PH domain 2 [Source:RGD Symbol;Acc:628844]	5953.81	0.435832	0.149587	2.91356	0.0035733	0.0228416	0.259758	0.149348	1.73928	0.0819862	0.200918	0.992794	0.149426	6.64406	3.05164e-11	1.51503e-09	-0.297204	0.149187	-1.99216	0.0463533	0.166747	2.53922	0.150343	16.8895	5.37164e-64	4.89058e-62	2.21412	0.150344	14.727	4.32233e-49	8.59557e-47	2.81971	0.150435	18.7437	2.1786e-78	4.41658e-76	1.82604	0.150392	12.1419	6.33385e-34	4.00432e-32	0.0477474	0.151789	0.314564	0.753093	1	0.0653326
Agap3	ENSRNOG00000012764	ArfGAP with GTPase domain, ankyrin repeat and PH domain 3 [Source:RGD Symbol;Acc:1310751]	16173.4	0.354905	0.0871333	4.07313	4.63861e-05	0.000558731	-0.194897	0.0870542	-2.23879	0.0251693	0.0812412	0.354273	0.0871009	4.06738	4.75439e-05	0.000608532	-0.194265	0.0870219	-2.23236	0.0255909	0.108887	-0.136751	0.0869369	-1.57299	0.11572	0.237132	0.133503	0.0869196	1.53593	0.124555	0.274855	0.0303113	0.0869086	0.348772	0.727261	0.843294	-0.293888	0.0869812	-3.37876	0.000728145	0.00387012	-0.0724846	0.0868167	-0.834916	0.403765	1	-0.0753559
Agbl4	ENSRNOG00000008011	ATP/GTP binding protein-like 4 [Source:RGD Symbol;Acc:6493177]	70.2097	-0.33257	0.503598	-0.660388	0.509005	0.745321	0.477136	0.503507	0.947626	0.34332	0.545812	-0.711255	0.503744	-1.41194	0.157968	0.35921	0.855821	0.503654	1.69923	0.0892767	0.260051	0.336062	0.503206	0.667842	0.504234	0.671238	0.257259	0.503611	0.510829	0.60947	0.775276	-0.305311	0.503765	-0.606058	0.544476	0.705881	0.561753	0.503365	1.11599	0.264425	0.460006	-0.0274569	0.504412	-0.0544335	0.95659	1	-0.390396
Agbl5	ENSRNOG00000008612	ATP/GTP binding protein-like 5 [Source:RGD Symbol;Acc:1598311]	327.561	0.110953	0.436402	0.254246	0.799306	0.91102	-0.172491	0.436381	-0.395275	0.69264	0.831626	-0.330343	0.436734	-0.756393	0.449414	0.679037	0.268806	0.436714	0.615519	0.538212	0.772964	-0.142205	0.435974	-0.326178	0.744289	0.85215	-0.559906	0.435578	-1.28543	0.198642	0.384852	-0.362201	0.436397	-0.82998	0.40655	0.587685	-0.435521	0.435698	-0.999594	0.317507	0.519604	0.234193	0.437173	0.535699	0.592166	1	0.587148
Ager	ENSRNOG00000000439	advanced glycosylation end product-specific receptor [Source:RGD Symbol;Acc:69258]	42.5232	-0.0843545	0.361549	-0.233314	0.815517	0.919645	0.41535	0.361713	1.14828	0.250851	0.443483	-0.0868481	0.361604	-0.240174	0.810195	0.921403	0.417843	0.361769	1.155	0.24809	0.499719	0.588598	0.361876	1.62652	0.103839	0.218319	-0.0033194	0.361735	-0.00917634	0.992678	0.997695	0.0442693	0.3617	0.122392	0.902588	0.955177	0.0611386	0.36184	0.168966	0.865823	0.930923	-0.0197917	0.361074	-0.0548135	0.956287	1	0.175519
Agfg1	ENSRNOG00000015619	ArfGAP with FG repeats 1 [Source:RGD Symbol;Acc:1560041]	3613.65	-0.700639	0.184309	-3.80144	0.000143855	0.00151736	0.990599	0.184157	5.37911	7.48544e-08	9.66953e-07	0.0585759	0.183805	0.318685	0.749965	0.88664	0.231385	0.183653	1.2599	0.207704	0.447366	0.980043	0.183802	5.33207	9.70975e-08	8.59198e-07	-0.153937	0.184302	-0.83524	0.403583	0.615285	0.468421	0.18383	2.54813	0.0108303	0.0340996	0.672595	0.183854	3.65831	0.000253889	0.00151598	0.125829	0.184982	0.680222	0.496364	1	0.143308
Agfg2	ENSRNOG00000001404	ArfGAP with FG repeats 2 [Source:RGD Symbol;Acc:1306590]	2532.97	-0.243603	0.21258	-1.14594	0.251822	0.506517	0.230128	0.212538	1.08277	0.278913	0.476182	-0.275173	0.212515	-1.29484	0.195375	0.412648	0.261699	0.212473	1.23168	0.218068	0.461129	0.396935	0.212286	1.86981	0.0615096	0.144471	-0.190583	0.212314	-0.897648	0.369373	0.582541	-0.196688	0.212357	-0.926212	0.354336	0.537231	-0.251548	0.211958	-1.18678	0.235315	0.424351	-0.304333	0.213205	-1.42742	0.153459	1	0.357107
Agk	ENSRNOG00000011509	acylglycerol kinase [Source:RGD Symbol;Acc:1562046]	1745.92	-0.202131	0.247188	-0.817721	0.413516	0.670085	-0.350272	0.247555	-1.41493	0.15709	0.320167	-0.165561	0.247073	-0.670088	0.502802	0.721353	-0.386842	0.24744	-1.56338	0.117964	0.312605	-0.418549	0.247166	-1.69339	0.0903811	0.195887	0.139151	0.247053	0.563241	0.573271	0.752288	-0.0617757	0.246919	-0.250187	0.802443	0.894878	0.233392	0.246755	0.945845	0.344228	0.545785	-0.107761	0.248493	-0.433657	0.664538	1	-0.207177
Agl	ENSRNOG00000016214	amylo-alpha-1, 6-glucosidase, 4-alpha-glucanotransferase [Source:RGD Symbol;Acc:1306376]	837.454	0.665994	0.280437	2.37485	0.0175563	0.0789275	-1.02517	0.280801	-3.65086	0.000261363	0.00169072	0.597502	0.280397	2.13091	0.0330964	0.123037	-0.956674	0.280762	-3.40742	0.000655799	0.00647505	0.771649	0.282315	2.73329	0.00627049	0.0216187	1.27049	0.28049	4.52952	5.9119e-06	5.05203e-05	1.31546	0.280887	4.68323	2.82386e-06	2.00074e-05	0.387583	0.280708	1.38073	0.167362	0.33389	-0.216261	0.284576	-0.759942	0.447289	1	0.524706
Agmat	ENSRNOG00000012315	agmatine ureohydrolase (agmatinase) [Source:RGD Symbol;Acc:1308424]	47.2978	-0.135863	0.43375	-0.31323	0.754106	0.88917	-0.314612	0.433466	-0.725806	0.467958	0.663548	0.242993	0.43407	0.559801	0.575615	0.775196	-0.693468	0.433786	-1.59864	0.109901	0.297638	-0.452952	0.433882	-1.04395	0.296507	0.470727	-0.279606	0.434129	-0.644063	0.519535	0.710964	0.300635	0.434254	0.692303	0.488747	0.661437	-0.279204	0.434353	-0.642805	0.520351	0.701667	-0.130623	0.428137	-0.305095	0.760294	1	0.13553
Agmo	ENSRNOG00000023116	alkylglycerol monooxygenase [Source:RGD Symbol;Acc:1312038]	96.9941	-0.615897	0.50486	-1.21994	0.222489	0.470425	-1.15871	0.504382	-2.29728	0.0216031	0.0718331	-0.48237	0.504913	-0.955354	0.339399	0.579134	-1.29223	0.504435	-2.56174	0.0104149	0.0568906	-0.950058	0.504451	-1.88335	0.059653	0.14102	-0.443482	0.504908	-0.878342	0.379758	0.59275	0.145778	0.50487	0.288743	0.772778	0.876075	0.685743	0.504979	1.35796	0.174476	0.343575	0.501178	0.503333	0.995719	0.319387	1	0.635855
Ago1	ENSRNOG00000055915	argonaute RISC catalytic component 1 [Source:RGD Symbol;Acc:1304619]	2910.72	-0.136746	0.211877	-0.645404	0.518665	0.750418	-0.111151	0.211954	-0.524412	0.599992	0.767718	0.0206192	0.211752	0.0973743	0.922429	0.978898	-0.268517	0.211829	-1.26761	0.204937	0.443883	0.568976	0.212022	2.68357	0.00728402	0.0246362	0.464447	0.211895	2.19187	0.0283886	0.0869762	0.856542	0.212003	4.04024	5.33961e-05	0.000303133	0.817331	0.211849	3.85809	0.000114278	0.000732502	0.216007	0.212994	1.01414	0.310514	1	0.21555
Ago2	ENSRNOG00000008533	argonaute RISC catalytic component 2 [Source:RGD Symbol;Acc:621255]	487.04	-0.573489	0.397389	-1.44314	0.14898	0.370693	0.587312	0.397287	1.4783	0.139326	0.29323	-0.725779	0.397441	-1.82613	0.0678306	0.205933	0.739602	0.39734	1.86138	0.06269	0.20561	0.0836797	0.396058	0.211281	0.832668	0.906313	-1.26916	0.396472	-3.20113	0.00136891	0.00675985	-1.48819	0.396591	-3.75245	0.000175116	0.000893278	-0.726919	0.395587	-1.83757	0.066126	0.168356	-0.03114	0.397129	-0.0784128	0.9375	1	0.762559
Ago3	ENSRNOG00000034269	argonaute RISC catalytic component 3 [Source:RGD Symbol;Acc:1309163]	228.957	1.36697	0.507784	2.69204	0.00710168	0.0389047	-0.0377233	0.507747	-0.0742956	0.940775	0.975814	0.596626	0.507798	1.17493	0.240024	0.469185	0.732625	0.507762	1.44285	0.149062	0.362181	0.47611	0.507746	0.937693	0.348402	0.525794	-0.0725361	0.507737	-0.142862	0.8864	0.944922	-0.782024	0.507756	-1.54016	0.123522	0.249446	-1.07297	0.507777	-2.11307	0.0345945	0.101378	0.365432	0.507457	0.720123	0.471449	1	0.584458
Ago4	ENSRNOG00000025596	argonaute RISC catalytic component 4 [Source:RGD Symbol;Acc:1304583]	59.253	0.623552	0.443266	1.40672	0.15951	0.387034	-0.615417	0.443339	-1.38814	0.165094	0.331611	0.782489	0.443404	1.76473	0.0776091	0.226117	-0.774354	0.443477	-1.7461	0.0807937	0.24411	-0.399032	0.443501	-0.899733	0.368262	0.544748	0.216459	0.443846	0.48769	0.62577	0.786772	0.00699801	0.44405	0.0157595	0.987426	0.997637	-0.713235	0.443609	-1.6078	0.107879	0.242622	-0.303585	0.442685	-0.685782	0.492851	1	-7.50823e-05
Agpat1	ENSRNOG00000000437	1-acylglycerol-3-phosphate O-acyltransferase 1 [Source:RGD Symbol;Acc:1303287]	8211.72	-0.259767	0.104403	-2.48812	0.012842	0.0621482	0.172993	0.104405	1.65695	0.0975292	0.22736	-0.188267	0.104308	-1.80492	0.0710869	0.212837	0.101494	0.104309	0.973005	0.330551	0.590491	0.0515496	0.10412	0.495098	0.620531	0.762105	-0.0778922	0.104258	-0.74711	0.454997	0.660458	-0.0338103	0.104225	-0.324396	0.745638	0.857058	0.166555	0.104068	1.60045	0.109499	0.245531	-0.0153169	0.104841	-0.146097	0.883845	1	-0.0435433
Agpat2	ENSRNOG00000019466	1-acylglycerol-3-phosphate O-acyltransferase 2 [Source:RGD Symbol;Acc:1309229]	17.6098	0	0.43682	0	1	NA	0.0218682	0.437129	0.0500268	0.960101	0.985366	1.07194	0.43936	2.43977	0.0146965	0.067171	-1.04945	0.439669	-2.38692	0.0169903	0.081075	-0.991408	0.440125	-2.25256	0.0242868	0.0680027	-0.674371	0.439378	-1.53483	0.124826	NA	0.444344	0.441554	1.00632	0.314263	0.493623	-0.334884	0.439187	-0.762509	0.445756	NA	0.287555	0.418993	0.6863	0.492524	1	-0.298883
Agpat3	ENSRNOG00000001205	1-acylglycerol-3-phosphate O-acyltransferase 3 [Source:RGD Symbol;Acc:1305787]	7640.77	0.0431048	0.11456	0.376265	0.70672	0.865364	0.178293	0.114449	1.55783	0.119274	0.263055	0.260339	0.11444	2.27489	0.0229126	0.0934421	-0.0389412	0.11433	-0.340604	0.733401	0.896704	0.81624	0.114486	7.12963	1.00637e-12	1.44164e-11	0.775278	0.114633	6.76313	1.35043e-11	2.50706e-10	0.868718	0.11455	7.58372	3.35773e-14	5.53849e-13	0.804044	0.114605	7.0158	2.28637e-12	3.89559e-11	0.071856	0.1155	0.622128	0.533858	1	-0.137302
Agpat4	ENSRNOG00000017731	1-acylglycerol-3-phosphate O-acyltransferase 4 [Source:RGD Symbol;Acc:619916]	4590.69	-0.636443	0.175572	-3.62496	0.000289003	0.00282227	0.688627	0.17552	3.92337	8.73205e-05	0.000633313	-0.255508	0.175298	-1.45756	0.144961	0.340437	0.307692	0.175245	1.75578	0.0791261	0.240983	0.255975	0.175057	1.46224	0.143676	0.279772	-0.432369	0.175443	-2.46444	0.0137227	0.0480337	-0.055317	0.175237	-0.31567	0.752253	0.862453	0.257913	0.175068	1.47322	0.140693	0.294733	0.0538219	0.175667	0.306385	0.759311	1	-0.000283832
Agpat5	ENSRNOG00000028623	1-acylglycerol-3-phosphate O-acyltransferase 5 [Source:RGD Symbol;Acc:1306405]	2445.48	0.159092	0.199154	0.798838	0.424384	0.67962	0.427629	0.198584	2.15339	0.0312882	0.0962932	0.556299	0.198733	2.79923	0.00512249	0.0297251	0.0304227	0.198162	0.153525	0.877984	0.963743	0.121234	0.197956	0.612428	0.540255	0.702228	-0.521881	0.198267	-2.63221	0.00848326	0.0317696	-0.0952449	0.197958	-0.481137	0.630419	0.770867	-0.753621	0.19831	-3.80021	0.000144571	0.000911595	-0.0725851	0.19933	-0.364145	0.71575	1	0.215294
Agpat6	NA	NA	3135.24	-0.370138	0.145507	-2.54377	0.0109663	0.0549754	0.47064	0.145359	3.23777	0.00120468	0.00641051	0.497161	0.144696	3.43591	0.000590576	0.00518	-0.39666	0.144547	-2.74416	0.00606659	0.0379211	0.376504	0.14477	2.60071	0.00930323	0.0304273	-0.328131	0.145132	-2.26092	0.0237643	0.0756038	0.522501	0.144439	3.61746	0.000297508	0.00144242	0.141003	0.144708	0.974395	0.329861	0.531767	0.098919	0.146843	0.673637	0.500542	1	0.233817
Agpat9	NA	NA	93.8526	0.868617	0.496441	1.74969	0.080172	0.243406	-0.775427	0.496573	-1.56156	0.118392	0.26179	0.0593937	0.496051	0.119733	0.904695	0.969321	0.0337958	0.496183	0.0681115	0.945697	0.992815	-1.14554	0.496869	-2.30552	0.0211377	0.0605461	-0.666349	0.497309	-1.33991	0.180274	0.360371	-1.6135	0.49691	-3.24706	0.00116603	0.00487554	-1.50797	0.496826	-3.03521	0.00240369	0.0109909	0.0267171	0.496153	0.0538485	0.957056	1	0.292847
Agps	ENSRNOG00000001547	alkylglycerone phosphate synthase [Source:RGD Symbol;Acc:620364]	164.477	0.75092	0.49935	1.5038	0.132634	0.344416	-0.325165	0.499088	-0.651519	0.514712	0.70335	0.98388	0.49923	1.97079	0.0487476	0.162868	-0.558125	0.498968	-1.11856	0.263329	0.515313	-0.674345	0.49883	-1.35185	0.176422	0.324494	-0.43015	0.498717	-0.862513	0.388405	0.602321	0.187178	0.498737	0.375305	0.707434	0.82864	-0.985539	0.499078	-1.97472	0.0482999	0.131889	0.194131	0.499097	0.388964	0.697303	1	0.0804049
Agr2	ENSRNOG00000005023	anterior gradient 2, protein disulphide isomerase family member [Source:RGD Symbol;Acc:1304606]	6.60987	-0.713066	0.305177	-2.33657	0.0194618	NA	0	0.303966	0	1	NA	-0.713822	0.305466	-2.33683	0.0194479	NA	0	0.304255	0	1	NA	-0.414291	0.30576	-1.35495	0.175432	NA	-0.0109034	0.304947	-0.0357549	0.971478	NA	0	0.304841	0	1	NA	0.575258	0.306851	1.87472	0.0608315	NA	-0.0696512	0.247457	-0.281468	0.778352	1	-0.237082
Agrn	ENSRNOG00000020205	agrin [Source:RGD Symbol;Acc:2067]	2164.57	0.336494	0.179175	1.87802	0.0603784	0.198233	-0.0729201	0.178876	-0.407657	0.683526	0.82616	0.560089	0.178936	3.13012	0.00174737	0.0125717	-0.296515	0.178636	-1.65988	0.0969384	0.274266	0.570205	0.178952	3.18637	0.00144072	0.00592576	0.955819	0.179233	5.33282	9.66996e-08	1.10254e-06	0.875356	0.178895	4.89313	9.9245e-07	7.56465e-06	0.386791	0.179164	2.15887	0.0308602	0.0931155	-0.232264	0.182051	-1.27582	0.202019	1	-0.312334
Agrp	ENSRNOG00000039001	agouti related neuropeptide [Source:RGD Symbol;Acc:2068]	64.8645	-0.0899587	0.504914	-0.178167	0.858592	0.941007	0.114688	0.50494	0.227132	0.820321	0.909234	-1.42544	0.504352	-2.82628	0.00470925	0.0278675	1.45017	0.504379	2.87516	0.00403828	0.0276757	0.258852	0.505037	0.512541	0.608272	0.752595	-0.0832836	0.50503	-0.164908	0.869016	0.936347	-0.774806	0.504267	-1.5365	0.124416	0.250808	0.26756	0.505041	0.529779	0.596265	0.760816	0.256919	0.504007	0.509752	0.610225	1	0.22403
Agt	ENSRNOG00000018445	angiotensinogen (serpin peptidase inhibitor, clade A, member 8) [Source:RGD Symbol;Acc:2069]	6623.54	-0.045704	0.143135	-0.319308	0.749493	0.886926	-1.39541	0.143845	-9.70078	2.99217e-22	1.34316e-20	-1.1852	0.143625	-8.25208	1.55664e-16	1.50503e-14	-0.255911	0.144333	-1.77306	0.0762185	0.2359	-0.277796	0.144075	-1.92814	0.0538378	0.13003	-0.251802	0.142946	-1.76151	0.0781518	0.193955	-0.0635691	0.143941	-0.441632	0.658755	0.793778	-0.247555	0.14289	-1.73249	0.0831863	0.20069	-0.0414498	0.143253	-0.289347	0.772316	1	1.36916
Agtpbp1	ENSRNOG00000018651	ATP/GTP binding protein 1 [Source:RGD Symbol;Acc:1306307]	8429.4	0.222089	0.146184	1.51924	0.128703	0.337345	0.288856	0.146023	1.97815	0.0479121	0.134182	0.727123	0.146038	4.979	6.39134e-07	1.34111e-05	-0.216179	0.145877	-1.48193	0.13836	0.344775	0.802455	0.146013	5.49578	3.8899e-08	3.61108e-07	0.86393	0.146212	5.90875	3.4472e-09	4.82073e-08	0.857636	0.145968	5.87549	4.2159e-09	4.28026e-08	0.683141	0.146236	4.67151	2.98991e-06	2.60819e-05	0.0412983	0.146294	0.282297	0.777716	1	-0.350318
Agtr1a	ENSRNOG00000018346	angiotensin II receptor, type 1a [Source:RGD Symbol;Acc:2070]	13.4872	0.468517	0.297203	1.57642	0.114929	NA	-0.468719	0.297284	-1.57667	0.114871	0.255859	0	0.29691	0	1	1	0	0.296991	0	1	1	0	0.297342	0	1	NA	0.0291139	0.297936	0.0977185	0.922156	NA	-0.149906	0.297343	-0.504151	0.614155	0.758933	-0.145332	0.297473	-0.488556	0.625156	NA	0.208673	0.253569	0.822944	0.41054	1	0.304107
Agtr2	ENSRNOG00000050006	angiotensin II receptor, type 2 [Source:RGD Symbol;Acc:2072]	0.647875	0	0.163035	0	1	NA	0	0.163298	0	1	NA	0	0.163418	0	1	NA	0	0.163681	0	1	NA	0	0.164848	0	1	NA	-0.319003	0.165269	-1.93021	0.0535812	NA	0	0.164467	0	1	NA	0	0.165009	0	1	NA	0.314018	0.167187	1.87824	0.0603483	1	0.313587
Agtrap	ENSRNOG00000008619	angiotensin II receptor-associated protein [Source:RGD Symbol;Acc:1359346]	588.891	0.146127	0.359298	0.406701	0.684228	0.853887	-0.602623	0.359705	-1.67533	0.0938699	0.221319	-0.330384	0.359652	-0.91862	0.358294	0.598618	-0.126113	0.360058	-0.350256	0.726146	0.893119	-0.30503	0.359501	-0.84848	0.396171	0.572661	0.41699	0.359047	1.16138	0.245487	0.445034	-0.0133096	0.359614	-0.0370107	0.970476	0.990332	-0.160087	0.358781	-0.446196	0.655456	0.801232	-0.429446	0.36138	-1.18835	0.234696	1	-0.118968
Ahctf1	ENSRNOG00000023541	AT hook containing transcription factor 1 [Source:RGD Symbol;Acc:1561291]	704.665	1.30836	0.328514	3.98265	6.81509e-05	0.000786172	-1.00478	0.328064	-3.06276	0.00219305	0.0106922	0.602565	0.32891	1.83201	0.0669503	0.203929	-0.298988	0.32846	-0.910272	0.362679	0.622342	1.46576	0.330248	4.43836	9.06472e-06	5.85468e-05	1.88398	0.328535	5.73451	9.77963e-09	1.2707e-07	0.886101	0.328814	2.69484	0.00704226	0.023516	-0.282225	0.328689	-0.858637	0.390541	0.591947	-0.855066	0.331779	-2.57722	0.0099599	0.71593	0.584415
Ahcy	ENSRNOG00000017777	adenosylhomocysteinase [Source:RGD Symbol;Acc:69260]	1824.02	-0.2367	0.221326	-1.06947	0.28486	0.544844	-0.121939	0.221541	-0.550414	0.582036	0.754887	-0.470393	0.221426	-2.12438	0.033638	0.124645	0.111754	0.221641	0.504211	0.614113	0.825567	0.184373	0.221351	0.832944	0.404877	0.580466	-0.0366564	0.221099	-0.165792	0.868321	0.936111	0.0414327	0.221541	0.187021	0.851645	0.925884	0.0837825	0.220759	0.37952	0.704302	0.835203	-0.116117	0.222878	-0.52099	0.602373	1	0.342539
Ahcyl1	ENSRNOG00000018569	adenosylhomocysteinase-like 1 [Source:RGD Symbol;Acc:1309768]	9695.29	-0.246325	0.13183	-1.8685	0.0616929	0.201279	0.290203	0.131788	2.20204	0.0276626	0.0876018	-0.230973	0.131776	-1.75277	0.079642	0.22975	0.274851	0.131734	2.08641	0.0369416	0.140959	-0.296106	0.131457	-2.25249	0.0242916	0.0680027	-0.61794	0.131591	-4.69591	2.65428e-06	2.39744e-05	-0.645767	0.131568	-4.90825	9.18917e-07	7.05551e-06	-0.317264	0.13147	-2.41321	0.0158127	0.0543625	0.0543491	0.13126	0.414058	0.678831	1	0.03163
Ahcyl2	ENSRNOG00000039300	adenosylhomocysteinase-like 2 [Source:RGD Symbol;Acc:1564895]	1868.51	-0.193603	0.288331	-0.671461	0.501927	0.739773	0.282447	0.288249	0.979873	0.327149	0.528934	-0.672738	0.288572	-2.33126	0.0197396	0.0840186	0.761581	0.28849	2.63989	0.0082933	0.0481089	0.275722	0.287974	0.957455	0.338338	0.514858	-0.134243	0.288115	-0.465934	0.641262	0.796268	-0.63139	0.288427	-2.18908	0.0285912	0.0779528	-0.110441	0.28789	-0.383621	0.701259	0.833517	-0.169671	0.288539	-0.588036	0.556508	1	0.127419
Ahdc1	ENSRNOG00000042855	AT hook, DNA binding motif, containing 1 [Source:RGD Symbol;Acc:1310031]	1180.56	0.268994	0.320268	0.839904	0.400962	0.658658	-0.128098	0.32015	-0.40012	0.689068	0.830009	0.385833	0.320162	1.20512	0.228158	0.45374	-0.244937	0.320044	-0.765323	0.444079	0.69424	1.40062	0.320823	4.36569	1.26721e-05	8.00374e-05	1.29144	0.320578	4.02848	5.6138e-05	0.000391365	1.87115	0.321134	5.8267	5.65325e-09	5.67537e-08	1.00356	0.32058	3.13046	0.00174533	0.00832933	-0.0188564	0.322359	-0.0584952	0.953354	1	0.236873
Ahi1	ENSRNOG00000013969	Abelson helper integration site 1 [Source:RGD Symbol;Acc:1303040]	4882.67	-0.0561348	0.130039	-0.431677	0.665976	0.843065	-1.06081	0.130529	-8.12705	4.39866e-16	1.30701e-14	-1.26619	0.130596	-9.69545	3.15257e-22	5.28329e-20	0.149241	0.131083	1.13852	0.254905	0.507267	1.37633	0.131851	10.4385	1.65377e-25	4.87446e-24	1.19313	0.130325	9.15503	5.43441e-20	2.18363e-18	0.85776	0.13171	6.5125	7.39097e-11	9.09864e-10	1.27726	0.130236	9.80726	1.04775e-22	3.82539e-21	0.0279793	0.13205	0.211885	0.832197	1	1.24347
Ahnak	ENSRNOG00000057569	AHNAK nucleoprotein [Source:RGD Symbol;Acc:619779]	389.888	0.502159	0.401606	1.25038	0.211162	0.455484	-0.967682	0.402038	-2.40694	0.0160867	0.0565675	0.486956	0.401534	1.21274	0.225229	0.450231	-0.952479	0.401965	-2.36955	0.0178095	0.0840844	0.161534	0.402543	0.401283	0.688212	0.812956	1.35188	0.401922	3.36353	0.000769519	0.00410212	1.04672	0.401748	2.60541	0.0091765	0.0296122	0.716646	0.402012	1.78265	0.0746432	0.184223	-0.132286	0.405281	-0.326405	0.744118	1	-0.221361
Ahr	ENSRNOG00000004342	aryl hydrocarbon receptor [Source:RGD Symbol;Acc:2074]	198.254	1.54956	0.503052	3.08031	0.00206784	0.0146726	-0.891274	0.502822	-1.77254	0.0763043	0.190254	1.41452	0.503054	2.81187	0.00492544	0.0289154	-0.75624	0.502824	-1.50398	0.132585	0.335035	-0.203317	0.502843	-0.404336	0.685966	0.81171	0.825027	0.50271	1.64116	0.100764	0.23402	0.198612	0.502667	0.395116	0.692758	0.819662	-0.759369	0.50306	-1.5095	0.131171	0.280461	-0.0346155	0.502875	-0.0688352	0.945121	1	-0.136224
Ahrr	ENSRNOG00000014721	aryl-hydrocarbon receptor repressor [Source:RGD Symbol;Acc:1559857]	7.85805	0.105126	0.188945	0.556382	0.57795	NA	0.0159849	0.189017	0.0845686	0.932604	NA	0.0609122	0.188971	0.322336	0.747198	NA	0.0601981	0.189043	0.318436	0.750154	NA	0.121314	0.189153	0.641352	0.521294	NA	0.10534	0.18912	0.557001	0.577527	NA	-0.08212	0.189131	-0.434197	0.664146	NA	0	0.189128	0	1	NA	0	0.172679	0	1	1	0
Ahsa1	ENSRNOG00000048981	AHA1, activator of heat shock 90kDa protein ATPase homolog 1 (yeast) [Source:RGD Symbol;Acc:1589285]	9635.46	-0.0557852	0.1006	-0.554527	0.579218	0.791437	-0.0435455	0.100606	-0.432833	0.665136	0.813856	-0.00243121	0.100535	-0.0241827	0.980707	1	-0.0968996	0.100541	-0.96378	0.335156	0.593929	0.221034	0.100504	2.19926	0.0278594	0.0762627	0.321593	0.100535	3.19881	0.00137998	0.00680308	0.31091	0.100519	3.09306	0.00198106	0.0078032	0.455638	0.100481	4.53459	5.77165e-06	4.76161e-05	0.0782482	0.101085	0.774081	0.438883	1	-0.0570054
Ahsa2	ENSRNOG00000052142	AHA1, activator of heat shock protein ATPase 2 [Source:RGD Symbol;Acc:1307171]	870.326	0.532862	0.339248	1.57072	0.116249	0.314728	-0.663401	0.33929	-1.95526	0.0505522	0.139554	0.157031	0.33942	0.462644	0.643619	0.824311	-0.28757	0.339463	-0.847133	0.396921	0.655194	0.00589353	0.339367	0.0173662	0.986144	0.994328	0.487575	0.338812	1.43907	0.15013	0.314571	0.241124	0.339201	0.710859	0.477172	0.65099	-0.182426	0.339037	-0.538071	0.590528	0.756576	-0.136832	0.340615	-0.40172	0.68789	1	0.1813
Ahsg	ENSRNOG00000038370	alpha-2-HS-glycoprotein [Source:RGD Symbol;Acc:2075]	0.536789	0	0.161314	0	1	NA	0	0.161616	0	1	NA	0	0.161754	0	1	NA	0	0.162056	0	1	NA	0	0.163402	0	1	NA	0	0.163104	0	1	NA	0	0.162961	0	1	NA	-0.312473	0.1643	-1.90184	0.0571916	NA	-0.294658	0.166395	-1.77083	0.0765883	1	0
Ahsp	ENSRNOG00000020165	alpha hemoglobin stabilizing protein [Source:RGD Symbol;Acc:1306725]	65.363	-0.0732058	0.5035	-0.145394	0.8844	0.951965	0.283702	0.503367	0.563608	0.573021	0.749381	-2.11413	0.50509	-4.18566	2.84345e-05	0.000388893	2.32463	0.504967	4.60353	4.15396e-06	9.00191e-05	0.96842	0.50344	1.9236	0.0544044	0.131123	0.115138	0.503335	0.22875	0.819063	0.907809	-1.59713	0.505166	-3.16159	0.00156913	0.00632939	0.166858	0.50322	0.331581	0.740205	0.858787	-0.0207397	0.505246	-0.0410488	0.967257	1	0.547157
Aida	ENSRNOG00000058805	axin interactor, dorsalization associated [Source:RGD Symbol;Acc:1592746]	1572.76	-0.0851645	0.288578	-0.295118	0.767904	0.897037	0.449015	0.288328	1.55731	0.119398	0.26319	-0.275149	0.288628	-0.9533	0.340438	0.579989	0.639	0.288378	2.21584	0.0267023	0.112224	0.395728	0.287981	1.37415	0.169396	0.314842	-0.115512	0.288262	-0.400717	0.688629	0.827921	-0.143853	0.288492	-0.498639	0.618034	0.761948	-0.0731641	0.288109	-0.253946	0.799537	0.892832	-0.04277	0.289109	-0.147937	0.882392	1	0.0621545
Aif1	ENSRNOG00000000853	allograft inflammatory factor 1 [Source:RGD Symbol;Acc:61924]	5249.46	-0.351851	0.14833	-2.37208	0.0176881	0.0793249	0.664374	0.148192	4.4832	7.35336e-06	6.69257e-05	0.264205	0.148031	1.78479	0.0742952	0.219515	0.0483181	0.147893	0.326709	0.743888	0.901834	1.22661	0.148198	8.2768	1.26526e-16	2.35984e-15	0.546894	0.148482	3.68325	0.000230282	0.00140797	1.16154	0.148292	7.83278	4.77207e-15	8.37711e-14	1.14587	0.148359	7.72363	1.13062e-14	2.32552e-13	0.247048	0.149452	1.65303	0.098325	1	0.0153356
Aif1l	ENSRNOG00000009951	allograft inflammatory factor 1-like [Source:RGD Symbol;Acc:1305081]	436.346	0.206965	0.371879	0.556538	0.577843	0.790281	-0.0510344	0.371398	-0.137412	0.890706	0.950106	0.444394	0.371266	1.19697	0.231319	0.457433	-0.288463	0.370784	-0.777983	0.436579	0.688416	-0.994994	0.369581	-2.69222	0.00709778	0.0240991	-1.03305	0.369605	-2.79502	0.0051897	0.0209607	-0.635822	0.369251	-1.72192	0.0850838	0.186472	-1.08017	0.369987	-2.91947	0.00350623	0.0153319	0.159111	0.371605	0.428172	0.668526	1	0.0886823
Aifm1	ENSRNOG00000006067	apoptosis-inducing factor, mitochondrion-associated 1 [Source:RGD Symbol;Acc:620817]	1641.07	0.467257	0.335655	1.39208	0.163899	0.393434	-0.0673793	0.335459	-0.200857	0.84081	0.920891	0.46361	0.335615	1.38137	0.167164	0.372387	-0.0637326	0.33542	-0.190008	0.849303	0.952094	0.53545	0.335478	1.59608	0.110471	0.229047	0.608095	0.335481	1.81261	0.0698924	0.178413	1.01597	0.335715	3.0263	0.00247565	0.00950167	0.245499	0.335646	0.731423	0.464521	0.658709	0.104601	0.335823	0.311476	0.755439	1	-0.00526281
Aifm2	ENSRNOG00000059445	apoptosis-inducing factor, mitochondrion-associated 2 [Source:RGD Symbol;Acc:1304964]	565.236	-0.0159084	0.417021	-0.0381478	0.96957	0.98616	-0.933743	0.417751	-2.23516	0.0254066	0.0818391	-0.0584384	0.416973	-0.140149	0.888542	0.962616	-0.891213	0.417703	-2.1336	0.0328754	0.130515	-0.774518	0.417534	-1.85498	0.0635989	0.148575	-0.180122	0.416667	-0.432293	0.665528	0.813146	0.0235924	0.416817	0.0566013	0.954863	0.981732	-0.251451	0.416558	-0.603639	0.546084	0.721482	-0.0870048	0.417563	-0.208363	0.834945	1	0.338388
Aifm3	ENSRNOG00000037957	apoptosis-inducing factor, mitochondrion-associated 3 [Source:RGD Symbol;Acc:1306028]	1633.56	-0.034634	0.341518	-0.101412	0.919223	0.964855	0.452232	0.341344	1.32486	0.185218	0.360206	-0.457689	0.341662	-1.33959	0.180378	0.39204	0.875287	0.341488	2.56315	0.0103726	0.056783	0.674527	0.341219	1.97682	0.0480621	0.118668	0.270481	0.341422	0.79222	0.428232	0.63754	-0.186814	0.341628	-0.546834	0.584493	0.738415	-0.0863348	0.341241	-0.253003	0.800266	0.893466	-0.391256	0.341417	-1.14598	0.251805	1	-0.0481618
Aig1	ENSRNOG00000010753	androgen-induced 1 [Source:RGD Symbol;Acc:1562920]	4062.27	-0.320509	0.131095	-2.44485	0.0144913	0.0682274	0.536565	0.130887	4.09944	4.14154e-05	0.000320733	-0.532808	0.131188	-4.06141	4.87775e-05	0.00062179	0.748864	0.13098	5.71739	1.08174e-08	4.73742e-07	0.00479013	0.130139	0.0368076	0.970638	0.985597	-0.546887	0.130627	-4.18662	2.83137e-05	0.000211192	-0.672343	0.130864	-5.13772	2.78089e-07	2.30713e-06	-0.111698	0.130309	-0.857179	0.391346	0.592664	0.114616	0.131918	0.868845	0.384932	1	0.0151065
Aimp1	ENSRNOG00000011384	aminoacyl tRNA synthetase complex-interacting multifunctional protein 1 [Source:RGD Symbol;Acc:620466]	4414.94	-0.202755	0.141671	-1.43116	0.152383	0.376845	0.729635	0.141391	5.16041	2.46415e-07	2.92463e-06	0.240573	0.141363	1.70181	0.0887913	0.245657	0.286307	0.141082	2.02936	0.042422	0.156364	1.14308	0.141305	8.08943	5.99439e-16	1.05554e-14	0.400328	0.141695	2.82527	0.00472409	0.0193397	0.77754	0.141471	5.49611	3.88261e-08	3.54655e-07	0.758308	0.141558	5.35686	8.4681e-08	9.08204e-07	0.15515	0.143122	1.08404	0.278347	1	0.0131072
Aimp2	ENSRNOG00000001044	aminoacyl tRNA synthetase complex-interacting multifunctional protein 2 [Source:RGD Symbol;Acc:1560787]	3147.04	-0.465707	0.22203	-2.09749	0.0359502	0.135687	0.383012	0.22203	1.72504	0.0845195	0.20506	-0.441469	0.221957	-1.98898	0.0467032	0.157926	0.358774	0.221957	1.61641	0.106005	0.291004	0.48873	0.221827	2.2032	0.0275805	0.0756678	0.121366	0.222041	0.546596	0.584657	0.759581	0.270459	0.222109	1.21768	0.223345	0.388959	0.499737	0.221734	2.25377	0.0242107	0.076794	-0.0872968	0.222497	-0.392349	0.6948	1	-0.0156418
Aip	ENSRNOG00000022289	aryl-hydrocarbon receptor-interacting protein [Source:RGD Symbol;Acc:628619]	3131.87	-0.585057	0.125771	-4.65177	3.29104e-06	5.37787e-05	0.293518	0.125991	2.32968	0.0198233	0.0671406	-1.00498	0.126267	-7.95917	1.73195e-15	1.43217e-13	0.713437	0.126485	5.64047	1.69583e-08	7.05792e-07	-0.618768	0.124612	-4.96554	6.85117e-07	5.34992e-06	-0.882787	0.125136	-7.05464	1.73049e-12	3.56834e-11	-1.11381	0.125877	-8.84843	8.87597e-19	2.0174e-17	-0.114237	0.124404	-0.918278	0.358473	0.560237	0.183339	0.127016	1.44344	0.148897	1	-0.0294739
Aipl1	ENSRNOG00000007889	aryl hydrocarbon receptor-interacting protein-like 1 [Source:RGD Symbol;Acc:70906]	90.3029	0.439874	0.474335	0.92735	0.353745	0.611461	-0.480897	0.474351	-1.0138	0.310679	0.511182	0.0847082	0.47426	0.178611	0.858243	0.946989	-0.12573	0.474276	-0.2651	0.790933	0.923391	-0.122892	0.474404	-0.259045	0.795601	0.885192	0.589722	0.474476	1.24289	0.213908	0.405917	0.0780664	0.474387	0.164563	0.869288	0.936254	0.347837	0.47432	0.733339	0.463352	0.657972	0.196354	0.473385	0.414786	0.678298	1	-0.230169
Aire	ENSRNOG00000001213	autoimmune regulator [Source:RGD Symbol;Acc:1311139]	4.42111	0	0.171874	0	1	NA	0	0.171916	0	1	NA	0	0.171935	0	1	NA	0	0.171977	0	1	NA	-0.190767	0.172225	-1.10766	0.26801	NA	-0.16076	0.172172	-0.933719	0.350449	NA	0	0.172101	0	1	NA	0	0.172182	0	1	NA	0.160896	0.172275	0.933949	0.35033	1	-0.029914
Ajap1	ENSRNOG00000050137	adherens junction associated protein 1 [Source:RGD Symbol;Acc:1590138]	2009.17	-0.376951	0.187371	-2.01179	0.0442423	0.158572	-0.25697	0.187968	-1.36709	0.171597	0.341198	0.0536189	0.18683	0.286992	0.774118	0.899002	-0.687539	0.18743	-3.66825	0.000244215	0.0028741	-0.355592	0.187354	-1.89797	0.0577001	0.137121	-0.341808	0.186977	-1.82807	0.0675389	0.173856	0.259556	0.186701	1.39022	0.164462	0.310613	-0.12653	0.186387	-0.678856	0.497229	0.684395	-0.161476	0.188902	-0.854814	0.392654	1	0.242887
Ajuba	ENSRNOG00000012791	ajuba LIM protein [Source:RGD Symbol;Acc:620407]	86.0952	-0.261863	0.452063	-0.579263	0.562412	0.7792	0.619625	0.452253	1.37009	0.17066	0.340103	0.179549	0.452347	0.396927	0.691421	0.85231	0.178213	0.452537	0.393808	0.693722	0.875617	-0.0727593	0.452761	-0.160701	0.872329	0.928615	-0.845346	0.452459	-1.86834	0.0617149	0.161883	-0.151457	0.452621	-0.334622	0.737911	0.850471	-0.592989	0.452652	-1.31003	0.190185	0.365198	-0.00926993	0.448327	-0.0206767	0.983504	1	0.148925
Ak1	ENSRNOG00000049056	adenylate kinase 1 [Source:MGI Symbol;Acc:MGI:87977]	12743.5	-0.199989	0.108686	-1.84006	0.0657597	0.21112	0.385704	0.108609	3.55132	0.000383299	0.00237676	-0.155369	0.108629	-1.43028	0.152637	0.351825	0.341084	0.108551	3.14216	0.00167705	0.0137232	-0.152359	0.108325	-1.4065	0.159575	0.301559	-0.326354	0.108513	-3.00751	0.00263394	0.0117909	-0.355692	0.108482	-3.27883	0.00104239	0.0044233	-0.195685	0.108395	-1.80529	0.0710288	0.177491	-0.0693191	0.108221	-0.640533	0.521826	1	-0.211707
Ak2	ENSRNOG00000000122	adenylate kinase 2 [Source:RGD Symbol;Acc:2077]	1127.7	-0.307142	0.350291	-0.876822	0.380583	0.637273	0.175121	0.350315	0.499895	0.617149	0.779828	-0.374714	0.350258	-1.06982	0.2847	0.521479	0.242692	0.350283	0.692846	0.488406	0.732114	0.0362195	0.349976	0.103491	0.917573	0.956483	0.137276	0.350236	0.391953	0.695093	0.832467	0.066754	0.350301	0.190562	0.848869	0.924321	0.255841	0.349914	0.731154	0.464685	0.658709	-0.188326	0.350848	-0.536773	0.591424	1	-0.275812
Ak3	ENSRNOG00000052506	adenylate kinase 3 [Source:RGD Symbol;Acc:619885]	3907.74	0.0238158	0.164195	0.145046	0.884675	0.951992	-0.0139502	0.164139	-0.0849904	0.932269	0.971052	-0.156306	0.164234	-0.951729	0.341235	0.580847	0.166172	0.164177	1.01215	0.311467	0.571424	-0.11129	0.163808	-0.679395	0.496888	0.66506	-0.0929458	0.163853	-0.567252	0.570543	0.750322	-0.478871	0.16389	-2.9219	0.00347898	0.012797	-0.11806	0.163794	-0.720782	0.471044	0.663616	-0.00129702	0.164793	-0.00787061	0.99372	1	-0.00439126
Ak4	ENSRNOG00000045738	adenylate kinase 4 [Source:RGD Symbol;Acc:2078]	94.781	0.677274	0.507656	1.33412	0.182165	0.417089	-0.644855	0.507641	-1.2703	0.203979	0.384841	1.08848	0.507602	2.14436	0.0320039	0.119924	-1.05606	0.507587	-2.08056	0.0374744	0.142344	-1.48976	0.507523	-2.93535	0.00333167	0.0124808	-0.456602	0.507476	-0.899751	0.368253	0.581463	-0.0460531	0.507434	-0.0907568	0.927686	0.968565	-1.53978	0.507528	-3.03388	0.00241428	0.0110267	-0.401789	0.507293	-0.792026	0.428346	1	-0.384354
Ak6	ENSRNOG00000039848	adenylate kinase 6 [Source:RGD Symbol;Acc:7387335]	1872.29	-0.523651	0.176071	-2.97409	0.00293863	0.0196165	0.644624	0.175888	3.66496	0.000247376	0.00161269	-0.664427	0.1761	-3.77301	0.00016129	0.00173714	0.7854	0.175917	4.4646	8.02171e-06	0.00015699	0.347426	0.174984	1.98548	0.0470916	0.116671	-0.317134	0.175769	-1.80427	0.0711893	0.180871	-0.259033	0.176147	-1.47055	0.141412	0.277286	0.326631	0.175101	1.86539	0.062127	0.160765	0.119952	0.178353	0.672551	0.501233	1	0.0199078
Ak7	ENSRNOG00000055714	adenylate kinase 7 [Source:RGD Symbol;Acc:1309600]	55.0493	0.53791	0.475124	1.13215	0.257573	0.513139	1.24789	0.476515	2.61879	0.00882431	0.034758	0.931094	0.475527	1.95803	0.0502267	0.166482	0.854708	0.476917	1.79215	0.0731086	0.229535	1.27761	0.476921	2.67887	0.00738702	0.0249434	0.0209383	0.476132	0.0439758	0.964924	0.985374	0.126673	0.476586	0.265792	0.790399	0.886062	-0.393704	0.475577	-0.827845	0.407759	0.608749	0.11696	0.471538	0.248039	0.804105	1	0.00836758
Ak8	ENSRNOG00000012761	adenylate kinase 8 [Source:RGD Symbol;Acc:1303144]	76.173	-0.178846	0.425478	-0.420341	0.674236	0.847512	0.384993	0.425577	0.90464	0.365656	0.568945	-0.260602	0.425495	-0.612467	0.540229	0.749416	0.466749	0.425593	1.0967	0.272771	0.526841	0.185515	0.425829	0.435657	0.663086	0.794378	-0.16758	0.42565	-0.393704	0.693799	0.831411	-0.285844	0.425621	-0.671593	0.501843	0.672029	0.203406	0.425721	0.477793	0.632798	0.786138	0.191446	0.425131	0.450321	0.652479	1	-0.0317959
Akap1	ENSRNOG00000002373	A kinase (PRKA) anchor protein 1 [Source:RGD Symbol;Acc:620826]	454.243	0.187329	0.455891	0.410908	0.68114	0.85189	-0.0341514	0.455724	-0.0749389	0.940263	0.975579	-0.340224	0.456213	-0.745756	0.455815	0.685139	0.493402	0.456046	1.08191	0.279291	0.533903	-0.463646	0.455231	-1.01848	0.308448	0.482578	-0.924764	0.455123	-2.0319	0.0421637	0.119437	-1.42338	0.455508	-3.12483	0.00177908	0.00709882	-1.27316	0.455172	-2.79708	0.00515661	0.0213076	-0.160682	0.455212	-0.352983	0.724101	1	0.493961
Akap10	ENSRNOG00000002899	A kinase (PRKA) anchor protein 10 [Source:RGD Symbol;Acc:1308869]	496.108	0.401574	0.412488	0.973543	0.330284	0.589223	0.0626292	0.412055	0.151992	0.879193	0.943848	0.482338	0.41235	1.16973	0.24211	0.471695	-0.0181345	0.411917	-0.0440245	0.964885	1	0.808173	0.412209	1.96059	0.0499267	0.122485	-0.00190421	0.411819	-0.0046239	0.996311	0.998707	0.0289685	0.41176	0.070353	0.943913	0.976705	-0.275292	0.412122	-0.667988	0.504141	0.689498	0.127737	0.413265	0.309091	0.757252	1	0.744577
Akap11	ENSRNOG00000009987	A kinase (PRKA) anchor protein 11 [Source:RGD Symbol;Acc:2079]	11013.2	0.705639	0.146043	4.83171	1.35368e-06	2.42287e-05	-0.906744	0.146068	-6.20768	5.37723e-10	9.02355e-09	0.297462	0.146083	2.03626	0.0417247	0.146002	-0.498567	0.146108	-3.41233	0.000644108	0.00638973	1.10628	0.146382	7.55748	4.10969e-14	6.48424e-13	1.87751	0.146195	12.8425	9.47443e-38	1.13432e-35	1.45319	0.146295	9.93327	2.98313e-23	8.9916e-22	1.23645	0.146277	8.45281	2.84367e-17	7.11628e-16	0.0645861	0.145999	0.442374	0.658218	1	0.135528
Akap12	ENSRNOG00000019549	A kinase (PRKA) anchor protein 12 [Source:RGD Symbol;Acc:70988]	852.084	0.212102	0.360425	0.588477	0.556212	0.774451	-0.397417	0.360497	-1.10241	0.270282	0.466069	0.0799754	0.360432	0.221888	0.824401	0.930416	-0.26529	0.360504	-0.735887	0.461799	0.70854	0.321344	0.360604	0.891126	0.372861	0.549239	0.235659	0.360119	0.654392	0.512859	0.705106	0.127434	0.360242	0.353747	0.723529	0.840794	0.278054	0.360289	0.771753	0.440261	0.637157	0.253963	0.361535	0.702459	0.482393	1	0.48207
Akap13	ENSRNOG00000010964	A kinase (PRKA) anchor protein 13 [Source:RGD Symbol;Acc:727893]	1026.88	0.873029	0.336128	2.59731	0.00939565	0.0489714	-0.301387	0.335704	-0.897777	0.369305	0.572893	0.635447	0.336183	1.89018	0.0587334	0.186043	-0.0638046	0.335758	-0.190031	0.849285	0.952094	1.00584	0.33615	2.99223	0.00276949	0.0105712	1.22888	0.335974	3.65767	0.000254518	0.00153773	0.867358	0.336086	2.58076	0.00985822	0.0314407	0.751676	0.336676	2.23264	0.0255726	0.0799526	0.395052	0.338065	1.16857	0.242577	1	0.0781949
Akap14	ENSRNOG00000006899	A kinase (PRKA) anchor protein 14 [Source:RGD Symbol;Acc:708510]	34.2909	-0.35212	0.497343	-0.708002	0.478944	NA	0.864749	0.497699	1.73749	0.0823003	0.201487	-0.521326	0.497295	-1.04832	0.29449	0.532045	1.03395	0.497652	2.07767	0.0377399	0.14305	1.2327	0.497864	2.47599	0.0132868	0.0409293	0.237006	0.497321	0.476565	0.633672	0.79219	0.579696	0.496567	1.16741	0.243046	0.412371	0.925638	0.497493	1.86061	0.0627999	0.162226	0.325458	0.495061	0.65741	0.510917	1	0.127046
Akap17a	ENSRNOG00000028211	A kinase (PRKA) anchor protein 17A [Source:RGD Symbol;Acc:1564640]	3916.73	-0.308971	0.175874	-1.75677	0.0789564	0.240608	0.744645	0.175707	4.238	2.25516e-05	0.000184658	0.328127	0.175589	1.86873	0.0616609	0.19255	0.107548	0.175421	0.613083	0.539822	0.773662	2.44522	0.176556	13.8496	1.28012e-43	7.18443e-42	1.36372	0.176515	7.72577	1.11179e-14	2.92479e-13	2.25415	0.176674	12.7588	2.78342e-37	1.54118e-35	1.93521	0.176466	10.9665	5.53934e-28	2.64042e-26	0.262398	0.178192	1.47256	0.14087	1	0.336693
Akap2	ENSRNOG00000011504	A kinase (PRKA) anchor protein 2 [Source:RGD Symbol;Acc:1305135]	4922.4	1.93852	0.123316	15.72	1.1035e-55	4.21354e-52	-1.6217	0.122995	-13.1851	1.06975e-39	1.41534e-37	1.24406	0.123488	10.0744	7.17193e-24	1.34543e-21	-0.927235	0.123167	-7.52825	5.14264e-14	6.66369e-12	1.04741	0.124168	8.43545	3.29931e-17	6.30665e-16	2.6191	0.123431	21.2192	6.34977e-100	8.27799e-97	1.74092	0.123621	14.0827	4.85433e-45	3.56807e-43	0.8767	0.124442	7.04503	1.85418e-12	3.17723e-11	0.196034	0.126233	1.55296	0.120434	1	0.0499846
Akap3	ENSRNOG00000059227	A kinase (PRKA) anchor protein 3 [Source:RGD Symbol;Acc:1359735]	34.9369	-0.541521	0.360505	-1.50212	0.133067	NA	0.736767	0.360636	2.04296	0.041056	0.119094	-0.233502	0.360788	-0.6472	0.517503	0.73381	0.428748	0.360919	1.18793	0.23486	0.482916	0.591582	0.361058	1.63847	0.101324	0.214165	-0.0411708	0.360536	-0.114193	0.909084	0.957219	0.315403	0.360683	0.87446	0.381868	0.563644	0.361626	0.361025	1.00167	0.316505	0.518741	-0.128965	0.352662	-0.36569	0.714597	1	-0.0965511
Akap5	ENSRNOG00000006410	A kinase (PRKA) anchor protein 5 [Source:RGD Symbol;Acc:620829]	3186.41	-0.797638	0.187522	-4.25357	2.10386e-05	0.000280229	1.08702	0.187358	5.80182	6.56006e-09	9.74626e-08	0.352016	0.186777	1.88469	0.0594715	0.187531	-0.0626359	0.186612	-0.335648	0.737137	0.898319	1.20834	0.187031	6.46065	1.04256e-10	1.26247e-09	0.0692619	0.187692	0.369019	0.712113	0.842431	0.988644	0.18693	5.28883	1.231e-07	1.0656e-06	0.799691	0.187014	4.27611	1.90186e-05	0.000143499	-0.0671669	0.188577	-0.356178	0.721707	1	0.0520327
Akap6	ENSRNOG00000004841	A kinase (PRKA) anchor protein 6 [Source:RGD Symbol;Acc:69412]	2557.92	0.799726	0.235	3.4031	0.00066627	0.00579068	-0.515098	0.234813	-2.19365	0.0282607	0.0890917	0.574325	0.235036	2.44356	0.0145431	0.066688	-0.289697	0.23485	-1.23354	0.217374	0.460098	0.754204	0.235126	3.20766	0.00133822	0.00555488	1.57948	0.235135	6.71732	1.85102e-11	3.38815e-10	1.14364	0.235167	4.8631	1.15563e-06	8.73954e-06	0.645671	0.235306	2.74396	0.00607021	0.0244847	-0.133992	0.236462	-0.566652	0.57095	1	-0.309969
Akap7	ENSRNOG00000013202	A kinase (PRKA) anchor protein 7 [Source:RGD Symbol;Acc:1303071]	247.073	0.298342	0.399134	0.747474	0.454778	0.704784	-0.0537115	0.398334	-0.13484	0.892738	0.950607	-0.693435	0.401785	-1.72588	0.0843685	0.238352	0.938065	0.400995	2.33935	0.0193176	0.0893972	-0.852289	0.396316	-2.15053	0.0315135	0.0843862	-0.545068	0.396652	-1.37417	0.169389	0.344982	-1.70868	0.399365	-4.27848	1.88175e-05	0.00011703	-0.988867	0.397051	-2.49053	0.0127554	0.0454442	-0.144281	0.400213	-0.36051	0.718465	1	-0.251486
Akap8	ENSRNOG00000006559	A kinase (PRKA) anchor protein 8 [Source:RGD Symbol;Acc:620832]	1423.5	-0.00466172	0.298317	-0.0156267	0.987532	0.995265	0.0801517	0.298209	0.268777	0.788101	0.888797	0.33063	0.298029	1.10939	0.267263	0.500257	-0.25514	0.29792	-0.856402	0.391775	0.64947	-0.0514482	0.297808	-0.172756	0.862843	0.923798	-0.0998458	0.297936	-0.335125	0.737531	0.857711	0.180261	0.297719	0.605475	0.544863	0.706165	-0.0364509	0.297873	-0.122371	0.902605	0.951478	0.058659	0.298893	0.196254	0.844411	1	-0.0317151
Akap8l	ENSRNOG00000006355	A kinase (PRKA) anchor protein 8-like [Source:RGD Symbol;Acc:1359200]	4407.67	1.0683	0.209327	5.10352	3.334e-07	6.80767e-06	-1.10178	0.209306	-5.26397	1.40974e-07	1.73716e-06	0.964814	0.209323	4.60921	4.04211e-06	7.027e-05	-0.998295	0.209303	-4.76962	1.84575e-06	4.41438e-05	0.536355	0.209637	2.5585	0.0105125	0.0337273	1.86358	0.209434	8.89819	5.6766e-19	2.07488e-17	1.46589	0.209386	7.00087	2.54375e-12	3.5604e-11	0.822565	0.209685	3.92285	8.75072e-05	0.000577865	0.0272836	0.210026	0.129906	0.896641	1	-0.2254
Akap9	ENSRNOG00000026319	A kinase (PRKA) anchor protein 9 [Source:RGD Symbol;Acc:620833]	5798.09	0.322746	0.214669	1.50346	0.13272	0.344471	-0.176323	0.214611	-0.821594	0.411308	0.612093	0.385035	0.214631	1.79394	0.0728228	0.216334	-0.238611	0.214573	-1.11203	0.266125	0.519238	0.937683	0.214764	4.3661	1.26482e-05	7.99278e-05	0.480481	0.214573	2.23925	0.0251399	0.0791706	0.889823	0.214673	4.14502	3.39791e-05	0.00020195	0.299986	0.214644	1.3976	0.162234	0.326261	0.142269	0.214158	0.664319	0.506486	1	0.633606
Akip1	ENSRNOG00000013744	A kinase (PRKA) interacting protein 1 [Source:RGD Symbol;Acc:1306959]	776.96	-0.811342	0.284536	-2.85145	0.00435198	0.0265563	0.846498	0.28443	2.97613	0.00291916	0.0136397	-0.489099	0.283897	-1.7228	0.084924	0.23933	0.524255	0.28379	1.84733	0.0646988	0.210021	0.771901	0.283578	2.722	0.00648874	0.0222961	-0.117075	0.284668	-0.411267	0.680877	0.822935	0.427546	0.28454	1.50259	0.132946	0.26423	1.0379	0.283814	3.65698	0.000255203	0.00152146	0.342518	0.288042	1.18913	0.23439	1	0.0423435
Akirin1	ENSRNOG00000026610	akirin 1 [Source:RGD Symbol;Acc:1585989]	4362.36	-0.478787	0.195002	-2.45529	0.0140771	0.0667994	0.987506	0.194719	5.07145	3.94804e-07	4.51939e-06	-0.192122	0.194709	-0.986715	0.323783	0.562757	0.700841	0.194425	3.60469	0.000312528	0.00352302	-0.34412	0.193846	-1.77522	0.0758609	0.170593	-1.12703	0.194524	-5.79379	6.88147e-09	9.13352e-08	-0.977623	0.194247	-5.03289	4.83129e-07	3.87027e-06	-0.722639	0.194118	-3.72268	0.000197119	0.00120929	-0.0743764	0.194142	-0.383103	0.701643	1	-0.204543
Akirin2	ENSRNOG00000008288	akirin 2 [Source:RGD Symbol;Acc:1307791]	6443.03	-0.498505	0.130168	-3.82971	0.000128292	0.00137088	0.915847	0.129969	7.04666	1.83266e-12	3.94088e-11	-0.449569	0.13006	-3.45663	0.000546968	0.00486198	0.866911	0.129861	6.67569	2.46077e-11	2.02153e-09	0.502689	0.129493	3.88196	0.000103616	0.000556134	-0.573027	0.129926	-4.4104	1.03179e-05	8.33171e-05	-0.461644	0.129906	-3.55366	0.000379904	0.0017985	-0.0705977	0.129586	-0.544793	0.585896	0.752946	0.00392306	0.130219	0.0301267	0.975966	1	0.159827
Akna	ENSRNOG00000008005	AT-hook transcription factor [Source:RGD Symbol;Acc:1308202]	311.866	0.112933	0.503931	0.224104	0.822677	0.923898	0.126996	0.503895	0.252029	0.801018	0.897525	0.520585	0.503879	1.03316	0.301531	0.539019	-0.280656	0.503842	-0.557031	0.577506	0.802064	-0.153171	0.50382	-0.304019	0.761113	0.862834	0.198541	0.50388	0.394024	0.693563	0.831411	0.388957	0.503826	0.772005	0.440111	0.619564	-0.161271	0.503859	-0.320071	0.748915	0.863751	-0.246252	0.503665	-0.488921	0.624898	1	-0.477573
Aknad1	ENSRNOG00000028025	AKNA domain containing 1 [Source:RGD Symbol;Acc:1583957]	5.59504	0.308151	0.237643	1.2967	0.194735	NA	-0.308307	0.237735	-1.29685	0.194682	NA	0	0.237452	0	1	NA	0	0.237545	0	1	NA	-0.273892	0.23815	-1.15008	0.25011	NA	0.186837	0.238273	0.78413	0.432964	NA	-0.00851971	0.237826	-0.0358234	0.971423	NA	0	0.237997	0	1	NA	0.079244	0.198477	0.39926	0.689702	1	-0.104539
Akp3	ENSRNOG00000058652	alkaline phosphatase 3, intestine, not Mn requiring [Source:RGD Symbol;Acc:621650]	0.0461931	0	0.137628	0	1	NA	0	0.137628	0	1	NA	0	0.137628	0	1	NA	0	0.137628	0	1	NA	0	0.137628	0	1	NA	0	0.137628	0	1	NA	0	0.137628	0	1	NA	-0.121731	0.137703	-0.88401	0.376691	NA	-0.0345242	0.163848	-0.210708	0.833115	1	0
Akr1a1	ENSRNOG00000016727	aldo-keto reductase family 1, member A1 (aldehyde reductase) [Source:RGD Symbol;Acc:68346]	36552.2	-0.373678	0.0894597	-4.17705	2.95308e-05	0.000379658	0.182833	0.089474	2.04342	0.0410109	0.11899	-0.219836	0.0894174	-2.45854	0.0139503	0.0644402	0.0289914	0.0894318	0.324174	0.745807	0.902138	-0.359485	0.0893445	-4.02359	5.73188e-05	0.000323168	-0.60792	0.0893812	-6.80142	1.0359e-11	1.95092e-10	-0.376994	0.0893618	-4.21874	2.4567e-05	0.000149315	-0.170409	0.089316	-1.90794	0.0563993	0.149321	0.0638444	0.0881247	0.724478	0.468772	1	0.0656136
Akr1b1	ENSRNOG00000009513	aldo-keto reductase family 1, member B1 (aldose reductase) [Source:RGD Symbol;Acc:2092]	3768.5	0.123467	0.116589	1.05899	0.289605	0.550122	-0.329762	0.116711	-2.82547	0.00472116	0.0204481	-0.804415	0.117537	-6.84392	7.70543e-12	4.21085e-10	0.598119	0.117658	5.08356	3.70423e-07	1.04861e-05	-0.32817	0.116309	-2.82154	0.00477934	0.0170375	-0.177188	0.115976	-1.5278	0.126563	0.278238	-0.985307	0.117116	-8.41308	3.99381e-17	8.12269e-16	-0.193503	0.116043	-1.66751	0.0954131	0.222587	0.10708	0.118269	0.905388	0.36526	1	0.178654
Akr1b10	ENSRNOG00000009734	aldo-keto reductase family 1, member B10 (aldose reductase) [Source:RGD Symbol;Acc:1308277]	205.677	-0.42963	0.482705	-0.890046	0.373441	0.630196	0.925936	0.482275	1.91993	0.0548661	0.148688	-1.6786	0.484647	-3.46356	0.000533079	0.00476887	2.17491	0.484225	4.49153	7.07128e-06	0.000141302	-0.355775	0.480986	-0.739677	0.459496	0.6318	-1.24656	0.481897	-2.58677	0.00968801	0.0354995	-2.38953	0.483974	-4.9373	7.92116e-07	6.16477e-06	-1.12806	0.481279	-2.34389	0.0190838	0.0636054	-0.308264	0.482907	-0.638351	0.523245	1	-0.0348123
Akr1b8	NA	NA	2.52082	-0.0658871	0.190692	-0.345516	0.729707	NA	0	0.190712	0	1	NA	-0.0660675	0.190837	-0.346198	0.729194	NA	0	0.190857	0	1	NA	-0.248342	0.191492	-1.29688	0.194673	NA	-0.0466624	0.191232	-0.24401	0.807223	NA	-0.0107741	0.191163	-0.0563609	0.955054	NA	-0.000842176	0.191477	-0.0043983	0.996491	NA	-0.0157171	0.171588	-0.0915976	0.927018	1	-0.161576
Akr1c12	ENSRNOG00000033010	aldo-keto reductase family 1, member C12 [Source:RGD Symbol;Acc:1359406]	3.48792	0	0.219851	0	1	NA	0	0.219966	0	1	NA	0.0140041	0.220038	0.0636438	0.949254	NA	-0.0141787	0.220154	-0.0644034	0.948649	NA	-0.318323	0.220931	-1.44083	0.149634	NA	-0.0492659	0.220572	-0.223355	0.823259	NA	-0.00882256	0.220522	-0.0400076	0.968087	NA	-0.194227	0.220867	-0.879385	0.379193	NA	-0.10592	0.191449	-0.553255	0.580089	1	-0.200382
Akr1c13	ENSRNOG00000050040	aldo-keto reductase family 1, member C13 [Source:RGD Symbol;Acc:1308232]	9.18534	-0.583961	0.380628	-1.5342	0.12498	NA	-0.0136533	0.37933	-0.0359931	0.971288	NA	-0.664794	0.380752	-1.746	0.0808102	NA	0.0671801	0.379454	0.177044	0.859474	NA	0.0785366	0.380579	0.206361	0.836509	NA	-0.088927	0.380764	-0.233549	0.815335	NA	-0.541338	0.381211	-1.42005	0.155594	NA	0.0521116	0.383346	0.135939	0.89187	NA	-0.424079	0.376575	-1.12615	0.260104	1	0.170651
Akr1c14	ENSRNOG00000017672	aldo-keto reductase family 1, member C14 [Source:RGD Symbol;Acc:708361]	215.253	0.225908	0.467749	0.482969	0.629118	0.820166	0.807515	0.466908	1.72949	0.0837207	0.203741	-0.322513	0.46821	-0.688821	0.490936	0.712587	1.35594	0.467372	2.90119	0.00371743	0.0260448	0.54078	0.466318	1.15968	0.246178	0.41364	0.0207794	0.467108	0.0444851	0.964518	0.985233	-0.952312	0.46744	-2.03729	0.0416206	0.105576	-0.266327	0.467182	-0.570071	0.56863	0.73842	-0.0607025	0.468596	-0.129541	0.896929	1	-0.285285
Akr1c19	ENSRNOG00000038319	aldo-keto reductase family 1, member C19 [Source:RGD Symbol;Acc:1562954]	96.6012	-0.232296	0.504455	-0.46049	0.645165	0.82898	0.16008	0.504457	0.317332	0.750992	0.867095	-1.07469	0.50418	-2.13155	0.0330438	0.122914	1.00247	0.504183	1.98831	0.0467778	0.167938	-0.572331	0.504695	-1.13401	0.256789	0.425846	-0.661926	0.504622	-1.31173	0.189612	0.372609	-1.4878	0.504321	-2.9501	0.00317666	0.0118094	-0.267334	0.504687	-0.529702	0.596318	0.760816	0.160865	0.504003	0.319174	0.749594	1	-0.0699091
Akr1c2	ENSRNOG00000029844	aldo-keto reductase family 1, member C2 [Source:RGD Symbol;Acc:1311841]	2.05188	0	0.17017	0	1	NA	0	0.170257	0	1	NA	0	0.170297	0	1	NA	0	0.170385	0	1	NA	0	0.170765	0	1	NA	-0.15275	0.170787	-0.894388	0.371114	NA	0	0.170643	0	1	NA	-0.191903	0.170935	-1.12266	0.261581	NA	-0.0390816	0.171348	-0.228083	0.819581	1	0.153106
Akr1c3	ENSRNOG00000017531	aldo-keto reductase family 1, member C3 [Source:RGD Symbol;Acc:708428]	4.01513	0.184729	0.171871	1.07482	0.282457	NA	-0.184778	0.171916	-1.07482	0.282456	NA	0	0.171838	0	1	NA	0	0.171883	0	1	NA	0	0.172077	0	1	NA	0.143223	0.172146	0.831986	0.405417	NA	-0.0777941	0.172048	-0.452165	0.65115	NA	-0.0468715	0.172117	-0.272323	0.785373	NA	-0.00535851	0.172187	-0.0311203	0.975174	1	0.0417194
Akr1cl	ENSRNOG00000021735	aldo-keto reductase family 1, member C-like [Source:RGD Symbol;Acc:1307514]	193.541	-0.290087	0.506366	-0.572879	0.566727	0.78234	0.280304	0.506372	0.553554	0.579884	0.753729	-0.723237	0.50633	-1.42839	0.153179	0.352686	0.713455	0.506336	1.40905	0.158819	0.378009	0.179684	0.506425	0.354808	0.722734	0.83803	-0.692176	0.506423	-1.36679	0.17169	0.347916	-1.39992	0.50639	-2.76451	0.00570084	0.0196366	-0.259727	0.506452	-0.512837	0.608065	0.767466	0.141974	0.506081	0.280535	0.779067	1	0.589652
Akr1d1	ENSRNOG00000013004	aldo-keto reductase family 1, member D1 [Source:RGD Symbol;Acc:620752]	46.3362	-0.254114	0.50371	-0.504485	0.61392	0.813342	-0.626111	0.504291	-1.24157	0.214396	0.398337	-0.215935	0.503605	-0.428779	0.668084	0.838852	-0.66429	0.504188	-1.31754	0.187657	0.419844	-0.209093	0.504204	-0.414699	0.678363	0.806203	0.28318	0.503697	0.562202	0.573978	0.752549	0.136288	0.503602	0.270626	0.786679	0.883625	0.515075	0.50342	1.02315	0.306236	0.507251	-0.0215346	0.505041	-0.0426394	0.965989	1	0.129542
Akr1e2	ENSRNOG00000017165	aldo-keto reductase family 1, member E2 [Source:RGD Symbol;Acc:1309599]	1079.44	0.30478	0.273382	1.11485	0.264914	0.520067	-0.532442	0.273548	-1.94643	0.0516029	0.141594	-0.260781	0.273849	-0.952279	0.340955	0.580608	0.0331191	0.274015	0.120866	0.903797	0.976801	-0.260541	0.27332	-0.953244	0.340467	0.517265	0.0937805	0.272728	0.343861	0.730951	0.853829	-0.61717	0.273235	-2.25875	0.0238988	0.0670958	0.0473983	0.273077	0.173571	0.862203	0.928743	0.257845	0.275384	0.93631	0.349114	1	0.177738
Akr7a2	ENSRNOG00000017780	aldo-keto reductase family 7, member A2 [Source:RGD Symbol;Acc:620311]	2263.24	0.804164	0.269705	2.98165	0.00286703	0.019217	-0.94507	0.269748	-3.50353	0.000459138	0.00280005	0.674504	0.269709	2.50086	0.0123892	0.0594576	-0.81541	0.269752	-3.02281	0.00250437	0.0189053	-0.851927	0.269581	-3.1602	0.00157663	0.00642307	0.205604	0.269119	0.76399	0.444873	0.651404	0.0313819	0.269178	0.116584	0.90719	0.957741	-0.606924	0.269512	-2.25194	0.024326	0.0770421	-0.00835917	0.269641	-0.0310011	0.975269	1	-0.112396
Akr7a3	ENSRNOG00000017899	aldo-keto reductase family 7, member A3 (aflatoxin aldehyde reductase) [Source:RGD Symbol;Acc:628635]	314.787	0.654104	0.344075	1.90105	0.0572954	0.191291	-0.036857	0.342436	-0.107632	0.914288	0.962128	0.432408	0.344275	1.256	0.209118	0.43018	0.184838	0.342638	0.539457	0.589571	0.809517	0.509335	0.342429	1.48742	0.136904	0.269245	-0.158281	0.341443	-0.463563	0.642961	0.797853	0.390223	0.343248	1.13686	0.255599	0.427779	-0.410087	0.343271	-1.19464	0.232226	0.420676	0.399294	0.347844	1.14791	0.251005	1	0.699083
Akt1	ENSRNOG00000028629	v-akt murine thymoma viral oncogene homolog 1 [Source:RGD Symbol;Acc:2081]	4819.31	0.782877	0.125155	6.25526	3.9685e-10	1.50527e-08	-1.33089	0.125783	-10.5809	3.65554e-26	2.25228e-24	0.0719094	0.125649	0.572302	0.567118	0.769275	-0.619928	0.126275	-4.90934	9.1384e-07	2.34889e-05	-1.70264	0.125322	-13.5861	4.84049e-42	2.58672e-40	-0.277578	0.124031	-2.23797	0.0252229	0.0793618	-1.10975	0.124562	-8.90924	5.13832e-19	1.18938e-17	-1.40218	0.124556	-11.2575	2.12812e-29	1.08318e-27	-0.341568	0.12518	-2.72862	0.00635995	0.546661	-0.0941209
Akt1s1	ENSRNOG00000020289	AKT1 substrate 1 (proline-rich) [Source:RGD Symbol;Acc:1312049]	3320.54	-0.0658184	0.226534	-0.290546	0.771399	0.898279	0.262736	0.226372	1.16064	0.24579	0.437138	0.244029	0.226282	1.07843	0.280844	0.516675	-0.0471112	0.226121	-0.208346	0.834959	0.946103	-0.582531	0.225766	-2.58024	0.00987329	0.0320192	-0.814545	0.225986	-3.6044	0.000312876	0.00185309	-0.533444	0.225782	-2.36265	0.0181447	0.0530622	-0.690744	0.225904	-3.05769	0.00223049	0.0103167	0.0579634	0.225903	0.256585	0.797499	1	-0.0307106
Akt2	ENSRNOG00000018677	v-akt murine thymoma viral oncogene homolog 2 [Source:RGD Symbol;Acc:2082]	731.556	1.19686	0.396303	3.02005	0.00252729	0.017294	0.0312262	0.394551	0.0791435	0.936918	0.973636	1.08846	0.396293	2.74661	0.00602138	0.0340548	0.139621	0.39454	0.353883	0.723426	0.891445	-1.07028	0.393647	-2.71889	0.00655018	0.0224758	-0.813637	0.393849	-2.06586	0.0388418	0.112332	-1.24765	0.393797	-3.16824	0.00153363	0.00620412	-1.80992	0.395504	-4.57624	4.73414e-06	3.97982e-05	0.200172	0.394306	0.507657	0.611694	1	-0.287323
Akt3	ENSRNOG00000021497	v-akt murine thymoma viral oncogene homolog 3 [Source:RGD Symbol;Acc:62390]	301.61	0.484714	0.414238	1.17013	0.241947	0.495029	-0.64834	0.414351	-1.56471	0.11765	0.260343	0.179568	0.414433	0.433286	0.664807	0.836847	-0.343194	0.414546	-0.82788	0.407738	0.66548	-0.411393	0.414071	-0.993532	0.320451	0.495242	0.63453	0.413751	1.5336	0.125127	0.275858	-0.00267438	0.41382	-0.00646267	0.994844	1	-0.112662	0.413916	-0.272184	0.78548	0.885445	-0.260649	0.416966	-0.625109	0.531899	1	-0.394864
Aktip	ENSRNOG00000011956	AKT interacting protein [Source:RGD Symbol;Acc:1311170]	7912.83	0.14334	0.11836	1.21106	0.225873	0.474923	-0.184288	0.118337	-1.55731	0.119397	0.26319	0.209541	0.118272	1.77169	0.0764466	0.223872	-0.250488	0.118249	-2.1183	0.0341494	0.133666	-0.557668	0.117995	-4.72622	2.28742e-06	1.63552e-05	-0.364896	0.117948	-3.09371	0.00197671	0.0092151	-0.433417	0.117878	-3.67684	0.000236144	0.00117316	-0.463913	0.117983	-3.93204	8.42274e-05	0.000558972	0.0443152	0.118263	0.374719	0.70787	1	-0.00848268
Alad	ENSRNOG00000015206	aminolevulinate dehydratase [Source:RGD Symbol;Acc:2083]	2348.35	-0.189104	0.162095	-1.16663	0.24336	0.496737	-0.309825	0.162524	-1.90634	0.0566061	0.152192	0.0539082	0.161762	0.333256	0.738941	0.880857	-0.552838	0.162192	-3.40854	0.000653126	0.00645881	-0.309848	0.162052	-1.91203	0.0558718	0.133681	-0.0348393	0.161779	-0.215351	0.829493	0.913884	0.349141	0.161708	2.15909	0.0308433	0.0829812	0.319801	0.161581	1.97919	0.0477941	0.130775	0.165356	0.164331	1.00624	0.3143	1	0.0347755
Alas1	ENSRNOG00000056596	5'-aminolevulinate synthase 1 [Source:RGD Symbol;Acc:68392]	1461.86	-0.0136999	0.208811	-0.0656089	0.947689	0.976151	-0.24153	0.209068	-1.15527	0.247981	0.439615	-0.0432389	0.208684	-0.207198	0.835855	0.936686	-0.211991	0.208941	-1.0146	0.310299	0.570113	-0.96619	0.207843	-4.64865	3.34122e-06	2.31885e-05	-0.339884	0.207877	-1.63502	0.102045	0.236135	-0.665538	0.20768	-3.20463	0.00135237	0.00556962	-0.407552	0.207657	-1.96262	0.0496904	0.135071	-0.0812299	0.210345	-0.386175	0.699367	1	-0.384118
Alas2	ENSRNOG00000000167	5'-aminolevulinate synthase 2 [Source:RGD Symbol;Acc:2084]	20.23	0.00992947	0.363987	0.0272797	0.978237	NA	0.149961	0.364264	0.411683	0.680572	0.824651	0.29577	0.364432	0.811591	0.417027	0.648899	-0.135879	0.36471	-0.372567	0.709471	0.883928	-0.163904	0.365084	-0.448948	0.653469	0.786689	-0.576999	0.364976	-1.58092	0.113896	NA	0.112164	0.364994	0.307304	0.758612	0.866818	-0.497972	0.36503	-1.36419	0.172506	NA	0.0840596	0.355178	0.236669	0.812914	1	0.247289
Alb	ENSRNOG00000002911	albumin [Source:RGD Symbol;Acc:2085]	253.694	-0.220389	0.413848	-0.532536	0.594355	0.801641	1.27243	0.411991	3.0885	0.0020117	0.00996259	0.747915	0.411719	1.81657	0.0692834	0.208981	0.304131	0.409844	0.742064	0.458048	0.705627	-0.0994051	0.408988	-0.243052	0.807965	0.891846	-0.620271	0.412193	-1.50481	0.132374	0.287778	-0.222356	0.409644	-0.542802	0.587266	0.739984	-0.0986449	0.411761	-0.239568	0.810665	0.901237	0.298536	0.414629	0.720008	0.47152	1	-0.745728
Alcam	ENSRNOG00000001989	activated leukocyte cell adhesion molecule [Source:RGD Symbol;Acc:619972]	4030.51	-0.236523	0.20455	-1.15631	0.247555	0.502016	-0.253999	0.204711	-1.24077	0.214691	0.398522	-1.03561	0.204904	-5.0541	4.32426e-07	9.38715e-06	0.545083	0.205064	2.65811	0.00785813	0.0463052	0.207447	0.204676	1.01354	0.310802	0.484741	-0.158311	0.20441	-0.774477	0.438649	0.645755	-0.371116	0.20502	-1.81014	0.0702738	0.160245	0.038162	0.204268	0.186823	0.851799	0.922167	-0.0400389	0.204627	-0.195668	0.84487	1	0.619582
Aldh16a1	ENSRNOG00000020623	aldehyde dehydrogenase 16 family, member A1 [Source:RGD Symbol;Acc:1566295]	931.082	0.010714	0.349599	0.0306465	0.975551	0.990335	-0.203113	0.349675	-0.580863	0.561333	0.740025	0.411001	0.349303	1.17663	0.239343	0.468291	-0.6034	0.349379	-1.72706	0.0841564	0.250833	0.0666128	0.349503	0.190593	0.848844	0.915348	0.24739	0.349404	0.708033	0.478925	0.679553	0.517852	0.349148	1.48319	0.138025	0.272251	0.6637	0.349557	1.89869	0.057605	0.15181	0.426156	0.350906	1.21445	0.224577	1	0.0222929
Aldh1a1	ENSRNOG00000017619	aldehyde dehydrogenase 1 family, member A1 [Source:RGD Symbol;Acc:2087]	722.334	-0.278744	0.329846	-0.845074	0.398069	0.65591	-0.337302	0.330296	-1.02121	0.307155	0.507252	-0.9576	0.330432	-2.89803	0.00375517	0.0230462	0.341554	0.33088	1.03226	0.301951	0.55969	0.28748	0.330362	0.870195	0.384194	0.560604	0.253914	0.329827	0.76984	0.441395	0.647983	0.278703	0.331272	0.841311	0.400174	0.580956	0.826641	0.329692	2.50731	0.0121654	0.0437255	0.293094	0.332606	0.881203	0.378208	1	0.369731
Aldh1a2	ENSRNOG00000055049	aldehyde dehydrogenase 1 family, member A2 [Source:RGD Symbol;Acc:620250]	862.444	0.657305	0.290299	2.26424	0.0235596	0.0986027	-0.95207	0.290713	-3.27495	0.00105682	0.00572058	0.358572	0.290522	1.23423	0.217116	0.440221	-0.653337	0.290936	-2.24564	0.0247272	0.10673	-1.45468	0.289831	-5.01906	5.19244e-07	4.11478e-06	-0.0927237	0.288722	-0.321152	0.748095	0.86511	-0.458298	0.289053	-1.58552	0.112849	0.233213	-1.01276	0.289392	-3.49961	0.000465948	0.00260324	-0.262031	0.291318	-0.899468	0.368404	1	-0.408809
Aldh1a3	ENSRNOG00000052070	aldehyde dehydrogenase 1 family, member A3 [Source:RGD Symbol;Acc:628662]	4.33593	0	0.191353	0	1	NA	0	0.191414	0	1	NA	0	0.191442	0	1	NA	0	0.191503	0	1	NA	0	0.191767	0	1	NA	-0.223972	0.191813	-1.16765	0.242947	NA	0	0.191682	0	1	NA	-0.2185	0.191895	-1.13864	0.254852	NA	0.00450641	0.172318	0.0261517	0.979136	1	0.177952
Aldh1a7	ENSRNOG00000017878	aldehyde dehydrogenase family 1, subfamily A7 [Source:MGI Symbol;Acc:MGI:1347050]	5.07672	-0.352068	0.172055	-2.04625	0.0407317	NA	0	0.171935	0	1	NA	-0.352134	0.172116	-2.04591	0.040765	NA	0	0.171996	0	1	NA	0	0.172176	0	1	NA	0	0.172134	0	1	NA	0	0.172118	0	1	NA	0.352399	0.17236	2.04456	0.0408986	NA	0	0.172234	0	1	1	0
Aldh1b1	ENSRNOG00000011497	aldehyde dehydrogenase 1 family, member B1 [Source:RGD Symbol;Acc:1306737]	810.602	0.0180421	0.315449	0.057195	0.95439	0.979864	-1.00901	0.316452	-3.1885	0.00143012	0.00743696	-0.211776	0.31554	-0.671155	0.502122	0.721105	-0.779191	0.316543	-2.46156	0.0138332	0.0697713	-0.154658	0.316722	-0.488307	0.625332	0.76622	0.47893	0.315373	1.51862	0.128859	0.281862	0.750611	0.316137	2.37432	0.0175811	0.0517269	0.233685	0.315118	0.741577	0.458343	0.653564	-0.226598	0.317927	-0.712737	0.476009	1	0.374376
Aldh1l1	ENSRNOG00000047023	aldehyde dehydrogenase 1 family, member L1 [Source:RGD Symbol;Acc:621294]	393.335	0.635704	0.379325	1.67588	0.0937614	0.272115	0.227662	0.378127	0.602079	0.547122	0.728549	0.537486	0.3793	1.41705	0.15647	0.357121	0.325881	0.378102	0.861886	0.38875	0.646152	0.834998	0.378194	2.20786	0.0272541	0.074906	0.844399	0.378788	2.22921	0.0257998	0.0806469	0.0791049	0.378225	0.209148	0.834333	0.914717	-0.214163	0.379003	-0.565069	0.572027	0.741379	-0.420361	0.382341	-1.09944	0.271575	1	-0.235619
Aldh1l2	ENSRNOG00000008586	aldehyde dehydrogenase 1 family, member L2 [Source:RGD Symbol;Acc:1309458]	29.3985	-0.687963	0.374258	-1.83821	0.0660319	NA	-0.0927955	0.373704	-0.248313	0.803892	0.899307	-0.780816	0.374285	-2.08615	0.0369648	0.133894	0	0.373731	0	1	1	-0.158847	0.37421	-0.424486	0.671211	0.801035	-0.593742	0.374505	-1.5854	0.112875	NA	-0.0257939	0.374002	-0.0689672	0.945016	0.977042	0.303597	0.375048	0.809487	0.418235	0.618395	0.190208	0.358219	0.530982	0.595431	1	0.47096
Aldh2	ENSRNOG00000001344	aldehyde dehydrogenase 2 family (mitochondrial) [Source:RGD Symbol;Acc:69219]	3509.92	0.453293	0.203338	2.22926	0.0257968	0.105763	-0.693436	0.20342	-3.40889	0.000652277	0.00379489	0.127921	0.203419	0.628854	0.529445	0.74104	-0.368063	0.2035	-1.80866	0.0705033	0.223551	-0.118347	0.203429	-0.58176	0.560728	0.717926	0.702856	0.203201	3.45892	0.000542344	0.00302583	0.385114	0.203371	1.89365	0.058271	0.138268	0.275925	0.203335	1.357	0.174783	0.343953	0.0263505	0.204026	0.129153	0.897237	1	-0.127712
Aldh3a1	ENSRNOG00000002331	aldehyde dehydrogenase 3 family, member A1 [Source:RGD Symbol;Acc:2088]	29.7903	-0.618164	0.396316	-1.55978	0.118813	NA	0.23133	0.396078	0.584053	0.559185	0.738403	-0.346403	0.396692	-0.873229	0.382538	0.618567	-0.0404307	0.396454	-0.101981	0.918772	0.982729	-0.00562735	0.396743	-0.0141839	0.988683	0.995478	-0.427512	0.396546	-1.07809	0.280994	NA	-0.231062	0.396849	-0.582241	0.560404	0.7186	0.258505	0.39716	0.650883	0.515122	0.69782	0.0642809	0.388723	0.165364	0.868657	1	0.179854
Aldh3a2	ENSRNOG00000002342	aldehyde dehydrogenase 3 family, member A2 [Source:RGD Symbol;Acc:61866]	2493.52	0.0804158	0.240031	0.335022	0.737608	0.881247	-0.289374	0.240092	-1.20526	0.228102	0.415931	-0.240756	0.240127	-1.00262	0.316045	0.554258	0.0317974	0.240188	0.132386	0.894679	0.972349	0.205408	0.240068	0.855623	0.392207	0.568938	0.638388	0.24003	2.65962	0.00782297	0.0296374	0.281139	0.240207	1.17041	0.241838	0.411043	0.553636	0.239987	2.30694	0.0210579	0.0685496	-0.0043331	0.240978	-0.0179813	0.985654	1	-0.143512
Aldh3b1	ENSRNOG00000017512	aldehyde dehydrogenase 3 family, member B1 [Source:RGD Symbol;Acc:1359546]	2534.71	0.290775	0.180183	1.61378	0.106576	0.29633	0.28873	0.179566	1.60794	0.107849	0.244641	0.724274	0.179738	4.0296	5.5872e-05	0.000697374	-0.144769	0.179119	-0.808224	0.418962	0.674255	-0.234311	0.17883	-1.31024	0.190113	0.342873	-0.108181	0.179368	-0.603122	0.546427	0.732923	0.0661219	0.178888	0.369628	0.711659	0.831663	-0.292169	0.179624	-1.62656	0.10383	0.236248	0.106688	0.181076	0.589186	0.555736	1	-0.414483
Aldh4a1	NA	NA	754.446	0.505246	0.367037	1.37655	0.168651	0.400487	-0.43394	0.36691	-1.18269	0.236933	0.426649	0.579873	0.366923	1.58037	0.114023	0.291112	-0.508567	0.366795	-1.38651	0.16559	0.387733	0.129358	0.366918	0.352553	0.724423	0.838966	0.327908	0.366532	0.894623	0.370988	0.584269	0.764387	0.36678	2.08405	0.037156	0.0963312	-0.142494	0.36683	-0.388448	0.697685	0.830728	0.0347577	0.368098	0.0944251	0.924771	1	0.234803
Aldh5a1	ENSRNOG00000023538	aldehyde dehydrogenase 5 family, member A1 [Source:RGD Symbol;Acc:621422]	2615.14	0.379811	0.200712	1.89231	0.058449	0.194237	-0.59965	0.200802	-2.98628	0.00282394	0.0132887	0.29406	0.200696	1.46521	0.142865	0.337264	-0.513899	0.200785	-2.55945	0.0104837	0.0571918	0.404694	0.201061	2.01279	0.0441364	0.110937	0.794194	0.200626	3.95858	7.53954e-05	0.000514011	1.00043	0.20094	4.97873	6.40034e-07	5.04679e-06	0.393791	0.20073	1.9618	0.0497859	0.135239	-0.0205761	0.202294	-0.101714	0.918984	1	0.209984
Aldh6a1	ENSRNOG00000011419	aldehyde dehydrogenase 6 family, member A1 [Source:RGD Symbol;Acc:621556]	1748.98	0.695218	0.256805	2.70719	0.00678556	0.037641	-0.721469	0.256753	-2.80998	0.00495448	0.0212899	0.287935	0.256991	1.12041	0.26254	0.495997	-0.314186	0.256939	-1.2228	0.221405	0.465124	-0.59014	0.256538	-2.3004	0.0214257	0.0611289	0.33705	0.256167	1.31574	0.18826	0.370799	-0.138116	0.256424	-0.538623	0.590147	0.74235	-0.596431	0.2565	-2.32527	0.0200576	0.0660117	-0.237994	0.25754	-0.924107	0.355431	1	-0.205488
Aldh7a1	ENSRNOG00000014645	aldehyde dehydrogenase 7 family, member A1 [Source:RGD Symbol;Acc:1308614]	1717.1	0.56319	0.246109	2.28838	0.0221154	0.0940357	-0.702587	0.24616	-2.85419	0.0043147	0.0189621	-0.460123	0.246877	-1.86378	0.0623533	0.194038	0.320726	0.246928	1.29886	0.193991	0.428669	-0.299154	0.246075	-1.21571	0.224097	0.386362	0.0843578	0.245447	0.343691	0.731079	0.853829	-0.687941	0.246449	-2.79141	0.00524785	0.018216	-0.372446	0.245829	-1.51506	0.129757	0.278129	0.106259	0.247128	0.429974	0.667215	1	0.318688
Aldh8a1	ENSRNOG00000014907	aldehyde dehydrogenase 8 family, member A1 [Source:RGD Symbol;Acc:1590218]	0.861297	0	0.16616	0	1	NA	0	0.166348	0	1	NA	0	0.166435	0	1	NA	0	0.166623	0	1	NA	-0.134435	0.167674	-0.801766	0.422688	NA	-0.171363	0.167537	-1.02284	0.306385	NA	-0.0231577	0.167229	-0.138479	0.889862	NA	0	0.167565	0	1	NA	0.172632	0.168741	1.02306	0.306281	1	0.0371433
Aldh9a1	ENSRNOG00000004027	aldehyde dehydrogenase 9 family, member A1 [Source:RGD Symbol;Acc:68409]	2723.3	-0.0800214	0.209973	-0.381102	0.703127	0.864292	-0.286137	0.210151	-1.36158	0.173331	0.343655	-0.0458758	0.209884	-0.218577	0.82698	0.932283	-0.320283	0.210062	-1.52471	0.127332	0.327258	-0.223727	0.209899	-1.06588	0.286478	0.459554	0.180107	0.209819	0.85839	0.390677	0.60425	0.141402	0.209793	0.67401	0.500305	0.670785	0.0694729	0.209617	0.331428	0.740321	0.858787	-0.190524	0.210804	-0.903794	0.366105	1	-0.117615
Aldoa	ENSRNOG00000052802	aldolase A, fructose-bisphosphate [Source:RGD Symbol;Acc:2089]	97016.4	-0.0373573	0.048328	-0.772996	0.439525	0.693133	0.0381434	0.0483199	0.789394	0.429881	0.628793	-0.155558	0.0483278	-3.2188	0.00128727	0.00982968	0.156344	0.0483196	3.23561	0.00121382	0.0106095	-0.427805	0.0482437	-8.86759	7.47475e-19	1.595e-17	-0.246183	0.0482683	-5.1003	3.39123e-07	3.55579e-06	-0.522975	0.0482707	-10.8342	2.37031e-27	8.78832e-26	-0.185262	0.0482547	-3.83924	0.000123414	0.000785609	0.0235661	0.0470709	0.500651	0.616617	1	-0.219788
Aldoart2	ENSRNOG00000030869	aldolase 1 A retrogene 2 [Source:RGD Symbol;Acc:1359133]	4.432	-0.0655519	0.354254	-0.185042	0.853196	NA	0.0825486	0.354695	0.232731	0.81597	NA	-0.110056	0.354611	-0.310358	0.756289	NA	0.127053	0.355051	0.357844	0.72046	NA	-0.480569	0.358539	-1.34035	0.180131	NA	-0.224221	0.356884	-0.628275	0.529824	NA	-0.174223	0.356296	-0.488983	0.624854	NA	0.115602	0.356942	0.323868	0.746038	NA	0.260161	0.352255	0.73856	0.460174	1	-0.325908
Aldob	ENSRNOG00000006807	aldolase B, fructose-bisphosphate [Source:RGD Symbol;Acc:2090]	33.1008	-0.457881	0.353198	-1.29639	0.194843	NA	0.128516	0.35308	0.363986	0.715868	0.845415	-0.641094	0.353159	-1.81531	0.0694759	0.20942	0.311729	0.35304	0.882984	0.377245	0.634958	0.00136941	0.353412	0.00387483	0.996908	0.999788	0.0945432	0.353202	0.267675	0.78895	0.889644	-0.121585	0.353083	-0.344352	0.730582	0.845551	0.412703	0.35357	1.16725	0.243111	0.433914	-0.131813	0.346063	-0.380894	0.703282	1	-0.209696
Aldoc	ENSRNOG00000011452	aldolase C, fructose-bisphosphate [Source:RGD Symbol;Acc:2091]	39883.4	0.276964	0.0534934	5.17754	2.24829e-07	4.81386e-06	-0.383073	0.0534981	-7.16049	8.03863e-13	1.78382e-11	-0.0448514	0.0535298	-0.837877	0.4021	0.636042	-0.0612574	0.0535345	-1.14426	0.252516	0.504821	-0.0378929	0.053466	-0.708729	0.478493	0.649063	0.260462	0.053398	4.87775	1.07305e-06	1.03452e-05	-0.0522646	0.0534651	-0.977546	0.328299	0.5087	0.0556016	0.0534339	1.04057	0.298076	0.49788	0.0721071	0.052908	1.36288	0.172921	1	0.0847219
Alg1	ENSRNOG00000002883	ALG1, chitobiosyldiphosphodolichol beta-mannosyltransferase [Source:RGD Symbol;Acc:1310700]	405.334	-0.131197	0.506984	-0.258779	0.795806	0.909141	-0.21345	0.506994	-0.421011	0.673747	0.8197	-0.348429	0.506988	-0.687253	0.491923	0.71364	0.00378256	0.506998	0.00746069	0.994047	1	-0.58023	0.506966	-1.14451	0.25241	0.420718	-0.445065	0.506959	-0.87791	0.379993	0.593037	-0.539245	0.506971	-1.06366	0.287482	0.463407	-0.26758	0.506951	-0.527821	0.597623	0.761528	0.0462958	0.506609	0.0913837	0.927188	1	0.0782973
Alg10	ENSRNOG00000014511	ALG10, alpha-1,2-glucosyltransferase [Source:RGD Symbol;Acc:708500]	39.7127	-0.454698	0.473703	-0.95988	0.337116	NA	-0.410703	0.472886	-0.868504	0.385118	0.587898	-0.984887	0.473184	-2.0814	0.0373971	0.135187	0.119485	0.472366	0.25295	0.800307	0.927615	-0.447665	0.473415	-0.945609	0.344348	0.521808	-0.513864	0.4741	-1.08387	0.278421	0.483958	-0.863355	0.473356	-1.8239	0.0681668	0.15652	-0.0954738	0.474637	-0.201151	0.84058	0.916064	-0.0358032	0.472481	-0.0757771	0.939596	1	0.46882
Alg11	ENSRNOG00000012841	ALG11, alpha-1,2-mannosyltransferase [Source:RGD Symbol;Acc:1564725]	1110.89	-0.238213	0.300418	-0.792939	0.427814	0.683079	-0.288002	0.300822	-0.957385	0.338373	0.540752	-0.437028	0.300493	-1.45437	0.145844	0.341935	-0.0891871	0.300897	-0.296404	0.766921	0.913085	-0.538415	0.300248	-1.79323	0.0729359	0.165581	-0.199851	0.300077	-0.665999	0.505412	0.699457	-0.382148	0.300281	-1.27264	0.203147	0.362795	-0.137311	0.299692	-0.458175	0.646827	0.795946	-0.175353	0.301501	-0.581601	0.560836	1	-0.0504684
Alg12	ENSRNOG00000004591	asparagine-linked glycosylation 12, alpha-1,6-mannosyltransferase [Source:RGD Symbol;Acc:1304826]	749.498	-0.22571	0.398724	-0.56608	0.571339	0.785489	0.608516	0.398482	1.52708	0.12674	0.274607	-0.422937	0.398781	-1.06057	0.288883	0.525626	0.805743	0.398539	2.02174	0.0432031	0.158592	0.234655	0.397987	0.589605	0.555456	0.713474	-0.293893	0.398414	-0.737657	0.460723	0.665184	-0.465471	0.398569	-1.16786	0.242864	0.412259	-0.227314	0.398137	-0.570944	0.568038	0.738289	-0.158825	0.398868	-0.398189	0.690491	1	-0.0798125
Alg13	ENSRNOG00000005753	ALG13, UDP-N-acetylglucosaminyltransferase subunit [Source:RGD Symbol;Acc:1359416]	758.519	-0.209638	0.437795	-0.47885	0.632045	0.82115	0.668161	0.437596	1.52689	0.126788	0.274664	-0.327784	0.437794	-0.748717	0.454028	0.683025	0.786307	0.437595	1.79688	0.0723543	0.227816	-0.0699243	0.437154	-0.159953	0.872918	0.929023	-0.521195	0.437506	-1.19128	0.233542	0.430367	-0.6943	0.437543	-1.58682	0.112554	0.23268	-0.370341	0.437347	-0.84679	0.397112	0.598133	-0.0587225	0.437292	-0.134287	0.893176	1	-0.216668
Alg14	ENSRNOG00000011528	ALG14, UDP-N-acetylglucosaminyltransferase subunit [Source:RGD Symbol;Acc:1312003]	1047.33	-0.354878	0.310722	-1.14211	0.253409	0.507571	0.197176	0.310795	0.634425	0.525804	0.712122	-0.00159475	0.310223	-0.00514065	0.995898	1	-0.156108	0.310296	-0.503092	0.6149	0.825978	-0.590767	0.309715	-1.90745	0.0564618	0.13483	-0.842744	0.310012	-2.71843	0.00655934	0.0256194	-0.478348	0.309618	-1.54496	0.122356	0.247687	-0.252603	0.309638	-0.815802	0.414613	0.614849	0.234814	0.311062	0.754878	0.450322	1	0.0546965
Alg2	ENSRNOG00000006369	ALG2, alpha-1,3/1,6-mannosyltransferase [Source:RGD Symbol;Acc:1309940]	8410.12	0.344014	0.129855	2.64922	0.00806778	0.0431673	-0.421964	0.129853	-3.24956	0.00115584	0.00618726	0.220586	0.129856	1.6987	0.089376	0.246406	-0.298536	0.129854	-2.29902	0.0215038	0.0965636	-0.222483	0.129749	-1.71473	0.0863954	0.189386	0.155894	0.12961	1.20279	0.229058	0.424839	-0.00903903	0.129654	-0.0697166	0.944419	0.976753	-0.352925	0.129659	-2.72194	0.00649	0.0259358	-0.164787	0.129747	-1.27006	0.204062	1	0.0435821
Alg3	ENSRNOG00000001712	ALG3, alpha-1,3- mannosyltransferase [Source:RGD Symbol;Acc:1306004]	1286.38	-0.337072	0.336559	-1.00152	0.316574	0.576436	0.61551	0.336314	1.83017	0.0672253	0.172475	-0.296171	0.336409	-0.88039	0.378648	0.615364	0.574609	0.336163	1.70932	0.0873925	0.256687	-0.59097	0.335308	-1.76247	0.0779904	0.174446	-1.12479	0.335885	-3.34874	0.000811813	0.00430217	-1.00227	0.335829	-2.98446	0.00284075	0.0107095	-0.703501	0.335548	-2.09657	0.0360317	0.104823	0.0841272	0.335818	0.250514	0.80219	1	-0.0816048
Alg5	ENSRNOG00000058694	ALG5, dolichyl-phosphate beta-glucosyltransferase [Source:RGD Symbol;Acc:1308900]	1202.28	-0.578665	0.325635	-1.77704	0.0755624	0.232804	-0.080813	0.326005	-0.247889	0.80422	0.89939	-0.811176	0.325727	-2.49036	0.0127615	0.0605968	0.151698	0.326097	0.465195	0.641792	0.844005	-0.437578	0.325471	-1.34444	0.178805	0.327748	-0.542856	0.325405	-1.66825	0.0952661	0.224675	-0.545242	0.325681	-1.67416	0.0940989	0.202072	0.36294	0.32508	1.11646	0.264225	0.459928	0.326677	0.326181	1.00152	0.316576	1	0.185836
Alg6	ENSRNOG00000009045	ALG6, alpha-1,3-glucosyltransferase [Source:RGD Symbol;Acc:1308815]	308.439	-0.400206	0.474632	-0.843192	0.399121	0.657075	0.0713063	0.474762	0.150194	0.880612	0.944246	-0.0679436	0.474381	-0.143226	0.886112	0.961662	-0.260957	0.474511	-0.549949	0.582355	0.804924	-0.602288	0.474226	-1.27004	0.204069	0.360739	-0.448385	0.474392	-0.945179	0.344568	0.55724	0.00266281	0.474255	0.00561472	0.99552	1	-0.273053	0.474047	-0.576004	0.564612	0.735748	-0.223923	0.474726	-0.47169	0.637148	1	-0.224257
Alg8	ENSRNOG00000012292	ALG8, alpha-1,3-glucosyltransferase [Source:RGD Symbol;Acc:1305468]	398.131	-0.025647	0.353862	-0.0724775	0.942222	0.974156	-1.82187	0.357399	-5.09759	3.44005e-07	3.9814e-06	-2.15647	0.358457	-6.01597	1.78816e-09	6.37095e-08	0.308947	0.36193	0.853611	0.393321	0.65108	-1.16334	0.357519	-3.25391	0.00113827	0.00480608	0.242421	0.353585	0.685608	0.49296	0.691606	-0.883134	0.359757	-2.4548	0.0140961	0.0428579	0.667487	0.353761	1.88683	0.0591833	0.154882	0.39726	0.358423	1.10835	0.267709	1	0.413854
Alg9	ENSRNOG00000010877	alpha-1,2-mannosyltransferase [Source:RGD Symbol;Acc:1311272]	788.526	-0.260333	0.337575	-0.771185	0.440597	0.694228	0.78611	0.337101	2.33197	0.0197021	0.0668561	-0.369603	0.337562	-1.09492	0.273553	0.50802	0.89538	0.337088	2.65622	0.00790214	0.0465426	0.59354	0.336424	1.76426	0.0776876	0.173895	-0.226601	0.337153	-0.672101	0.50152	0.697443	-0.634884	0.337079	-1.88349	0.059634	0.140521	-0.072886	0.336694	-0.216475	0.828617	0.910847	-0.106341	0.338674	-0.313993	0.753526	1	0.0339414
Alk	ENSRNOG00000008683	anaplastic lymphoma receptor tyrosine kinase [Source:RGD Symbol;Acc:628622]	275.802	1.23989	0.462634	2.68006	0.0073608	0.0400751	-0.684359	0.462169	-1.48076	0.138672	0.292395	0.113566	0.463199	0.245178	0.806319	0.918897	0.441963	0.462736	0.955107	0.339523	0.599462	1.01367	0.462852	2.19005	0.0285208	0.077635	0.7149	0.461944	1.54759	0.121721	0.270294	0.577365	0.463297	1.24621	0.212688	0.374893	-0.00213469	0.462867	-0.00461189	0.99632	0.998091	0.519796	0.463827	1.12067	0.262429	1	0.976784
Alkbh1	ENSRNOG00000012264	alkB homolog 1, histone H2A dioxygenase [Source:RGD Symbol;Acc:1308327]	865.697	0.169709	0.395745	0.428834	0.668044	0.844164	-0.236484	0.395733	-0.597586	0.550116	0.730987	0.779426	0.395365	1.97141	0.0486769	0.162752	-0.846202	0.395353	-2.14037	0.0323248	0.129104	-0.780472	0.395224	-1.97476	0.0482956	0.119101	-0.530197	0.395128	-1.34184	0.179649	0.359513	0.201515	0.394859	0.510346	0.609809	0.75611	-0.637745	0.395202	-1.61372	0.106588	0.240575	0.0620715	0.395351	0.157003	0.875242	1	-0.0137715
Alkbh2	ENSRNOG00000028584	alkB homolog 2, alpha-ketoglutarate-dependent dioxygenase [Source:RGD Symbol;Acc:1306377]	883.149	0.442627	0.315721	1.40195	0.160929	0.388666	0.218352	0.315121	0.692914	0.488363	0.681706	0.00638249	0.315993	0.0201982	0.983885	1	0.654596	0.315394	2.07549	0.0379415	0.143554	0.61018	0.315005	1.93705	0.0527396	0.127905	0.538621	0.315312	1.70822	0.0875957	0.210563	0.224626	0.315857	0.711166	0.476982	0.650887	0.417456	0.31582	1.32182	0.186229	0.359701	0.320647	0.317961	1.00845	0.31324	1	-0.146434
Alkbh3	ENSRNOG00000021678	alkB homolog 3, alpha-ketoglutarate-dependent dioxygenase [Source:RGD Symbol;Acc:1359731]	1913.25	-0.758072	0.176379	-4.29798	1.72358e-05	0.000234764	0.04894	0.177006	0.276488	0.782173	0.886332	-0.45406	0.175871	-2.58178	0.00982926	0.0495962	-0.255072	0.1765	-1.44517	0.148411	0.361298	-0.185156	0.176173	-1.05099	0.293263	0.466959	-0.229475	0.176353	-1.30122	0.193182	0.377429	0.0538969	0.175998	0.306235	0.759425	0.867274	0.544536	0.175415	3.10427	0.00190746	0.00899939	0.01592	0.178834	0.0890208	0.929065	1	-0.00461614
Alkbh4	ENSRNOG00000001428	alkB homolog 4, lysine demthylase [Source:RGD Symbol;Acc:1308608]	476.599	0.131152	0.384289	0.341284	0.732889	0.878708	-0.754963	0.38502	-1.96084	0.0498977	0.138203	0.140631	0.384159	0.366076	0.714309	0.8667	-0.764443	0.384891	-1.98613	0.0470192	0.168468	-0.584534	0.384673	-1.51956	0.128622	0.256557	0.127618	0.383764	0.332543	0.73948	0.859041	-0.290876	0.383475	-0.758527	0.448136	0.627171	-0.378214	0.383542	-0.98611	0.324079	0.526168	-0.373117	0.3859	-0.966876	0.333606	1	0.0426216
Alkbh5	ENSRNOG00000028341	alkB homolog 5, RNA demethylase [Source:RGD Symbol;Acc:1309496]	974.982	0.688439	0.446106	1.54322	0.122777	0.327046	0.139321	0.445762	0.312545	0.754627	0.86962	0.204014	0.446239	0.457186	0.647537	0.826371	0.623746	0.445895	1.39886	0.161854	0.382335	-0.310916	0.445529	-0.697859	0.485265	0.654806	-0.558345	0.44558	-1.25307	0.210179	0.401221	-1.2371	0.445715	-2.77553	0.0055111	0.0190456	-1.24984	0.445829	-2.80341	0.00505656	0.0209663	-0.0030581	0.444994	-0.00687223	0.994517	1	0.108116
Alkbh6	ENSRNOG00000047943	alkB homolog 6 [Source:RGD Symbol;Acc:1566318]	11.2918	-0.262281	0.467787	-0.560685	0.575012	NA	-0.288575	0.466337	-0.618812	0.536041	NA	-0.236761	0.468231	-0.505649	0.613103	NA	-0.314095	0.466782	-0.672895	0.501014	NA	-0.192149	0.467586	-0.410938	0.681118	NA	-0.410387	0.469263	-0.874536	0.381827	NA	0.115121	0.468246	0.245856	0.805794	NA	0.40894	0.469342	0.871307	0.383587	NA	0.532738	0.464235	1.14756	0.25115	1	0.485197
Alkbh7	ENSRNOG00000047089	alkB homolog 7 [Source:RGD Symbol;Acc:1598126]	3916.35	-0.333868	0.12927	-2.58272	0.00980245	0.0505342	0.581297	0.129113	4.50223	6.7244e-06	6.18733e-05	-0.0525701	0.129031	-0.407422	0.683698	0.846919	0.299999	0.128874	2.32785	0.0199203	0.0913121	1.87294	0.129771	14.4326	3.22482e-47	2.02226e-45	0.956578	0.129773	7.37118	1.69118e-13	3.86043e-12	1.6213	0.130168	12.4555	1.3051e-35	6.89236e-34	1.62986	0.129732	12.5633	3.3618e-36	2.21879e-34	0.339199	0.132443	2.56108	0.0104346	0.730281	0.334852
Alkbh8	ENSRNOG00000024525	alkB homolog 8, tRNA methyltransferase [Source:RGD Symbol;Acc:1304687]	187.557	0.0103133	0.425201	0.0242551	0.980649	0.992572	-1.38682	0.428417	-3.23707	0.00120764	0.00642155	-1.198	0.427736	-2.80079	0.00509773	0.0296272	-0.178502	0.430913	-0.414242	0.678697	0.865019	-1.01154	0.428157	-2.36253	0.0181504	0.0533701	-0.117507	0.424327	-0.276926	0.781837	0.886539	-1.28837	0.42713	-3.01634	0.00255848	0.00976838	-0.217658	0.424081	-0.513246	0.607779	0.767466	-0.0889642	0.428599	-0.20757	0.835565	1	0.487642
Allc	NA	NA	41.9144	-0.501227	0.409512	-1.22396	0.220967	NA	0.275906	0.409431	0.673876	0.50039	0.692129	-0.329806	0.409717	-0.80496	0.420843	0.652633	0.104485	0.409636	0.255067	0.798671	0.926528	0.0477635	0.409899	0.116525	0.907236	0.950626	-0.214918	0.409647	-0.524641	0.599833	0.76891	-0.00960085	0.409737	-0.0234317	0.981306	0.995396	0.10462	0.410124	0.255094	0.79865	0.89231	-0.180087	0.408608	-0.440733	0.659406	1	-0.0130966
Alms1	ENSRNOG00000022343	Alstrom syndrome protein 1 [Source:RGD Symbol;Acc:1311590]	509.957	0.633696	0.407247	1.55605	0.119696	0.321557	-0.316741	0.406904	-0.778417	0.436323	0.63474	0.653838	0.40716	1.60585	0.108307	0.2807	-0.336883	0.406817	-0.828094	0.407617	0.665456	0.13337	0.406842	0.327817	0.74305	0.851833	0.253947	0.406567	0.624615	0.532224	0.7209	0.573424	0.406789	1.40964	0.158647	0.30231	-0.0155247	0.407173	-0.038128	0.969586	0.984669	0.362911	0.408366	0.888689	0.37417	1	0.195476
Alox12	ENSRNOG00000027037	arachidonate 12-lipoxygenase [Source:RGD Symbol;Acc:1311159]	46.185	0.183661	0.415783	0.441722	0.65869	0.839197	-0.213479	0.415825	-0.513386	0.607681	0.773195	0.567635	0.416089	1.36422	0.1725	0.379876	-0.597453	0.41613	-1.43574	0.151078	0.365313	-0.600678	0.41632	-1.44283	0.149069	0.287315	-0.393609	0.416414	-0.945233	0.34454	0.55724	0.207278	0.416542	0.497616	0.618755	0.762389	-0.204318	0.416207	-0.490906	0.623493	0.779496	0.369387	0.415099	0.889877	0.373532	1	0.00635959
Alox12b	ENSRNOG00000022210	arachidonate 12-lipoxygenase, 12R type [Source:RGD Symbol;Acc:1305330]	8.96745	-0.792004	0.284744	-2.78146	0.00541156	NA	-0.0836378	0.283749	-0.29476	0.768177	NA	-0.87569	0.284804	-3.07471	0.00210705	NA	0	0.283809	0	1	NA	0	0.284405	0	1	NA	-0.0196723	0.284528	-0.06914	0.944878	NA	0	0.284213	0	1	NA	0.858968	0.285632	3.00725	0.00263622	NA	0.048452	0.235191	0.206011	0.836782	1	0.0583643
Alox15	ENSRNOG00000019183	arachidonate 15-lipoxygenase [Source:RGD Symbol;Acc:70493]	46.3021	0.020754	0.436876	0.0475056	0.96211	0.982261	0.831643	0.437672	1.90015	0.0574135	0.153931	0.82506	0.437668	1.88513	0.0594126	0.187519	0.0273368	0.438464	0.0623467	0.950287	0.994104	-0.279959	0.438818	-0.637984	0.523484	0.688144	-0.278824	0.437625	-0.63713	0.52404	0.714218	0.375661	0.438383	0.856925	0.391486	0.573095	-0.166424	0.437642	-0.380275	0.703741	0.834733	0.124991	0.43178	0.289478	0.772215	1	-0.799932
Alox15b	ENSRNOG00000007778	arachidonate 15-lipoxygenase, type B [Source:RGD Symbol;Acc:628809]	4.68981	0	0.171862	0	1	NA	0.303502	0.172041	1.76413	0.0777103	NA	0	0.171924	0	1	NA	0.30357	0.172103	1.76388	0.0777514	NA	0.303769	0.172287	1.76316	0.0778731	NA	0	0.172107	0	1	NA	0	0.172091	0	1	NA	-0.0480817	0.172188	-0.279239	0.780061	NA	-0.0482808	0.172228	-0.28033	0.779224	1	0
Alox5	ENSRNOG00000012972	arachidonate 5-lipoxygenase [Source:RGD Symbol;Acc:2096]	109.115	0.587531	0.493844	1.18971	0.23416	0.48487	-1.55675	0.493497	-3.15453	0.00160758	0.00821768	-0.415997	0.493611	-0.842763	0.399361	0.633805	-0.553223	0.493265	-1.12155	0.262052	0.514533	-0.345451	0.493337	-0.700233	0.483782	0.653783	0.748719	0.493942	1.5158	0.129569	0.282991	-0.419485	0.493701	-0.849674	0.395506	0.57703	0.231478	0.493828	0.468742	0.639254	0.790324	0.0697618	0.492937	0.141523	0.887457	1	0.458422
Alox5ap	ENSRNOG00000000907	arachidonate 5-lipoxygenase activating protein [Source:RGD Symbol;Acc:2097]	164.932	0.411508	0.50614	0.813031	0.4162	0.672626	-0.218818	0.506101	-0.43236	0.66548	0.814055	-1.34962	0.506472	-2.66475	0.00770457	0.0411729	1.54231	0.506434	3.04543	0.00232346	0.0178615	0.0276291	0.506068	0.0545957	0.956461	0.979247	-0.205936	0.506012	-0.406979	0.684023	0.82463	-1.79118	0.506378	-3.53723	0.000404343	0.00190344	-0.37202	0.506072	-0.735112	0.462271	0.656701	0.243949	0.505965	0.482145	0.629703	1	0.44949
Aloxe3	ENSRNOG00000007454	arachidonate lipoxygenase 3 [Source:RGD Symbol;Acc:1306252]	113.239	2.06691	0.505514	4.08873	4.33742e-05	0.000526884	-1.18018	0.505037	-2.33682	0.0194486	0.066103	1.85425	0.505533	3.66791	0.000244542	0.00245695	-0.967519	0.505057	-1.91566	0.0554079	0.188546	-0.729985	0.505018	-1.44546	0.148328	0.2862	0.438903	0.504701	0.86963	0.384503	0.597849	0.336897	0.504785	0.667407	0.504512	0.674382	-1.92365	0.505417	-3.80606	0.000141196	0.000891716	-0.292633	0.505005	-0.579465	0.562275	1	0.0111657
Alpi	ENSRNOG00000030020	alkaline phosphatase, intestinal [Source:RGD Symbol;Acc:2099]	0.138579	0	0.139955	0	1	NA	0	0.140639	0	1	NA	0	0.140949	0	1	NA	0	0.141633	0	1	NA	0	0.144853	0	1	NA	0	0.144197	0	1	NA	0	0.143754	0	1	NA	-0.239308	0.146888	-1.62919	0.103273	NA	-0.111763	0.163848	-0.682113	0.495168	1	0
Alpk3	ENSRNOG00000011659	alpha-kinase 3 [Source:RGD Symbol;Acc:1309860]	2.67129	0.178206	0.171088	1.04161	0.297594	NA	-0.131978	0.171191	-0.77094	0.440743	NA	0	0.171044	0	1	NA	0.0463119	0.171146	0.270598	0.7867	NA	0.0466261	0.171437	0.271972	0.785643	NA	0.171475	0.17148	0.999972	0.317324	NA	0	0.171308	0	1	NA	-0.116529	0.171496	-0.679485	0.49683	NA	-0.109662	0.171683	-0.638748	0.522987	1	0.00711899
Alpl	ENSRNOG00000013954	alkaline phosphatase, liver/bone/kidney [Source:RGD Symbol;Acc:2100]	332.085	0.22594	0.442994	0.51003	0.61003	0.811039	-0.176295	0.44287	-0.398075	0.690575	0.830527	-0.316732	0.44341	-0.714309	0.475036	0.699355	0.366377	0.443286	0.826501	0.40852	0.665968	-0.234764	0.442445	-0.530607	0.595691	0.744313	-0.524468	0.442144	-1.18619	0.235547	0.432838	-0.916749	0.442722	-2.07071	0.038386	0.098827	-0.376812	0.442425	-0.851697	0.394382	0.59541	0.371816	0.443559	0.838255	0.401888	1	0.463741
Als2	ENSRNOG00000023280	amyotrophic lateral sclerosis 2 (juvenile) [Source:RGD Symbol;Acc:1310372]	249	0.283529	0.448052	0.632804	0.526862	0.754795	-0.273962	0.44787	-0.6117	0.540737	0.723727	1.24732	0.446722	2.79217	0.00523558	0.0303114	-1.23776	0.446538	-2.77189	0.00557312	0.0356207	-1.06593	0.44634	-2.38815	0.0169332	0.0503938	-1.29975	0.445714	-2.91611	0.0035443	0.015216	-0.0936279	0.444622	-0.210578	0.833216	0.914414	-1.37168	0.446234	-3.07391	0.00211275	0.00984037	0.21032	0.446655	0.470879	0.637727	1	0.504552
Als2cr12	ENSRNOG00000024917	amyotrophic lateral sclerosis 2 (juvenile) chromosome region, candidate 12 [Source:RGD Symbol;Acc:1359362]	45.7212	0	0.495488	0	1	1	1.34279	0.497299	2.70016	0.00693054	0.0283284	2.4996	0.497909	5.02019	5.16209e-07	1.10532e-05	-1.15518	0.499686	-2.31181	0.0207882	0.0943614	0.533362	0.499067	1.06872	0.285196	0.458149	-0.540428	0.497038	-1.0873	0.276905	0.482394	1.0108	0.499938	2.02186	0.0431911	0.108922	-0.705809	0.497341	-1.41917	0.155851	0.317086	-0.145854	0.491685	-0.296641	0.766741	1	-0.240736
Alx1	ENSRNOG00000004390	ALX homeobox 1 [Source:RGD Symbol;Acc:2273]	20.8168	-0.61876	0.381305	-1.62274	0.104644	NA	0.0224508	0.380715	0.0589699	0.952976	0.982327	-0.63123	0.381459	-1.65478	0.0979698	0.262683	0.034921	0.38087	0.0916874	0.926946	0.985518	-0.310684	0.381701	-0.813946	0.415676	0.591602	-0.372909	0.381577	-0.977285	0.328428	NA	-0.696102	0.381812	-1.82315	0.0682801	0.15658	0.386247	0.38236	1.01016	0.312416	NA	0.129516	0.37114	0.348969	0.727112	1	0.0368471
Alx3	ENSRNOG00000018290	ALX homeobox 3 [Source:RGD Symbol;Acc:1359270]	42.4912	-0.426281	0.444916	-0.958115	0.338005	0.596862	-0.234764	0.444402	-0.52827	0.597312	0.765849	-0.747051	0.444704	-1.67988	0.0929801	0.253068	0.0860061	0.44419	0.193625	0.84647	0.951803	-0.347244	0.444927	-0.780451	0.435126	0.609335	-0.607445	0.445337	-1.36401	0.172564	0.349233	-0.876174	0.445004	-1.96891	0.0489633	0.12027	0.137103	0.445644	0.307653	0.758347	0.869204	0.303535	0.437678	0.693512	0.487988	1	0.470031
Alx4	ENSRNOG00000000008	ALX homeobox 4 [Source:RGD Symbol;Acc:1310201]	4.58375	-0.174397	0.383501	-0.45475	0.649289	NA	-0.0126372	0.382972	-0.0329976	0.973676	NA	-0.11899	0.384428	-0.309525	0.756922	NA	-0.0680445	0.383899	-0.177246	0.859315	NA	-0.528105	0.38729	-1.36359	0.172697	NA	-0.147824	0.38573	-0.383231	0.701548	NA	0.13226	0.384933	0.343592	0.731153	NA	0.0558725	0.387187	0.144304	0.885261	NA	0.0278478	0.381495	0.0729966	0.941809	1	-0.352255
Alyref	ENSRNOG00000036687	Aly/REF export factor [Source:RGD Symbol;Acc:1594679]	3822.56	-0.61737	0.139384	-4.42926	9.45577e-06	0.000136311	0.45632	0.139433	3.27269	0.0010653	0.00576149	-0.0496136	0.13887	-0.357266	0.720893	0.870487	-0.111436	0.138919	-0.802166	0.422457	0.677106	0.233135	0.138871	1.67879	0.0931922	0.200717	-0.229169	0.139287	-1.64531	0.0999068	0.23263	0.380973	0.138915	2.74248	0.00609774	0.0208008	0.613188	0.138839	4.41652	1.00301e-05	7.97359e-05	0.224853	0.140754	1.59748	0.110158	1	0.00598395
Amacr	ENSRNOG00000018662	alpha-methylacyl-CoA racemase [Source:RGD Symbol;Acc:3048]	1234.27	0.172422	0.246978	0.698126	0.485098	0.728876	-0.713541	0.247542	-2.88251	0.00394521	0.0175841	0.101091	0.246932	0.409389	0.682254	0.846585	-0.642211	0.247496	-2.59483	0.0094637	0.0530787	-0.451524	0.247295	-1.82585	0.067873	0.156457	0.10555	0.246444	0.42829	0.66844	0.815176	0.0759166	0.24658	0.307879	0.758175	0.866633	0.249993	0.24671	1.01331	0.310912	0.51286	0.316249	0.249337	1.26836	0.20467	1	0.156164
Ambp	ENSRNOG00000006889	alpha-1-microglobulin/bikunin precursor [Source:RGD Symbol;Acc:2102]	7.23234	0	0.298464	0	1	NA	0	0.298626	0	1	NA	0	0.298701	0	1	NA	0	0.298862	0	1	NA	-0.299695	0.299958	-0.999123	0.317735	NA	-0.0662535	0.2995	-0.221214	0.824926	NA	-0.651686	0.300185	-2.17095	0.0299352	NA	-0.202287	0.299899	-0.674515	0.499984	NA	-0.0822982	0.246898	-0.333329	0.738886	1	-0.144338
Ambra1	ENSRNOG00000017422	autophagy/beclin 1 regulator 1 [Source:RGD Symbol;Acc:621330]	1774.08	0.910301	0.254492	3.57693	0.00034765	0.00331139	-0.950019	0.254455	-3.73354	0.000188806	0.00126768	1.3328	0.254279	5.24148	1.59294e-07	3.79919e-06	-1.37252	0.254243	-5.39846	6.72153e-08	2.32735e-06	0.564407	0.255098	2.21251	0.0269314	0.0741186	1.28987	0.254345	5.07133	3.95035e-07	4.10536e-06	1.46904	0.254101	5.78131	7.41196e-09	7.3355e-08	0.316221	0.254765	1.24123	0.214522	0.396498	-0.0632729	0.256284	-0.246886	0.804997	1	0.224292
Amd1	ENSRNOG00000000585	adenosylmethionine decarboxylase 1 [Source:RGD Symbol;Acc:2104]	9289.64	-0.101405	0.147297	-0.688439	0.491177	0.732512	0.460028	0.147183	3.12556	0.00177468	0.00893666	0.190271	0.147179	1.29278	0.196086	0.413594	0.168352	0.147065	1.14475	0.252315	0.50467	0.420821	0.147024	2.86225	0.00420643	0.0153042	-0.0223484	0.147174	-0.15185	0.879305	0.94097	0.226296	0.147093	1.53846	0.123937	0.250123	-0.116219	0.147068	-0.790241	0.429387	0.627216	-0.19528	0.146778	-1.33045	0.183371	1	-0.0168596
Amdhd1	ENSRNOG00000005266	amidohydrolase domain containing 1 [Source:RGD Symbol;Acc:1308879]	4.07281	0	0.177439	0	1	NA	0	0.177487	0	1	NA	0.158012	0.177593	0.889741	0.373605	NA	-0.158066	0.177641	-0.889806	0.37357	NA	0	0.177766	0	1	NA	-0.058755	0.177741	-0.330565	0.740973	NA	0.0926116	0.177813	0.520838	0.60248	NA	-0.0937117	0.177825	-0.526988	0.598202	NA	-0.0326334	0.172236	-0.18947	0.849725	1	0.05495
Amdhd2	ENSRNOG00000006460	amidohydrolase domain containing 2 [Source:RGD Symbol;Acc:1304601]	924.459	0.802318	0.385516	2.08116	0.0374197	0.139851	-0.543862	0.385334	-1.4114	0.158126	0.321537	0.307395	0.385665	0.797053	0.42542	0.657782	-0.0489394	0.385483	-0.126956	0.898975	0.974112	0.266483	0.385434	0.691385	0.489323	0.658449	0.787226	0.385232	2.04351	0.0410019	0.116965	0.680361	0.385674	1.76408	0.0777178	0.173721	0.221495	0.385626	0.574378	0.565712	0.736382	0.236227	0.386145	0.611758	0.540698	1	0.0230854
Amelx	ENSRNOG00000003965	amelogenin, X-linked [Source:RGD Symbol;Acc:2107]	1.64024	0	0.168933	0	1	NA	0	0.169052	0	1	NA	0	0.169107	0	1	NA	0	0.169227	0	1	NA	0	0.169748	0	1	NA	-0.340691	0.169944	-2.00473	0.0449924	NA	0	0.16958	0	1	NA	0	0.169815	0	1	NA	0.341218	0.170623	1.99984	0.0455178	1	0.341018
Amer1	ENSRNOG00000007984	APC membrane recruitment protein 1 [Source:RGD Symbol;Acc:1560322]	53.3351	0.512595	0.493508	1.03868	0.298955	0.559473	-0.640061	0.493478	-1.29704	0.194617	0.372547	0.325461	0.493476	0.659527	0.509557	0.726725	-0.452927	0.493446	-0.917885	0.358679	0.617567	-0.0752391	0.493471	-0.152469	0.878817	0.932614	1.0098	0.493549	2.046	0.0407559	0.116433	-0.0352463	0.49385	-0.0713705	0.943103	0.976041	-0.300085	0.493715	-0.60781	0.543313	0.719387	-0.782424	0.492041	-1.59016	0.111799	1	-0.435436
Amh	ENSRNOG00000019377	anti-Mullerian hormone [Source:RGD Symbol;Acc:2108]	14.6078	0.00784802	0.283263	0.0277057	0.977897	NA	-0.0080148	0.283336	-0.0282872	0.977433	0.994283	0.709673	0.283843	2.50023	0.0124114	0.059512	-0.709839	0.283917	-2.50017	0.0124134	0.0643134	0	0.283753	0	1	NA	-0.113177	0.28376	-0.398846	0.690006	NA	0.704198	0.284136	2.47838	0.013198	0.0404402	-0.229283	0.283912	-0.807584	0.41933	NA	-0.0805828	0.252766	-0.318805	0.749875	1	0.0873189
Amhr2	ENSRNOG00000014850	anti-Mullerian hormone receptor, type II [Source:RGD Symbol;Acc:70964]	51.6493	-0.154863	0.357469	-0.433219	0.664856	0.842048	0.487051	0.357603	1.36199	0.173202	0.343558	-0.210297	0.357496	-0.588251	0.556364	0.761426	0.542486	0.357629	1.51689	0.129294	0.3306	0.286242	0.357848	0.7999	0.423769	0.599165	-0.13258	0.357636	-0.370713	0.710852	0.841872	-0.134991	0.357591	-0.377501	0.705802	0.827616	0.0427303	0.357739	0.119446	0.904922	0.952363	0.0204004	0.357362	0.0570862	0.954477	1	-0.0680783
Amigo1	ENSRNOG00000045665	adhesion molecule with Ig like domain 1 [Source:RGD Symbol;Acc:1303079]	210.439	0.325722	0.507573	0.641726	0.521051	0.752126	-0.199771	0.507557	-0.393593	0.693882	0.832008	-0.552689	0.507633	-1.08876	0.276261	0.511313	0.678641	0.507618	1.33691	0.181251	0.410493	-1.21874	0.507486	-2.40152	0.0163269	0.0488734	-0.828796	0.507484	-1.63315	0.102438	0.236875	-2.15526	0.50754	-4.24649	2.17142e-05	0.000133722	-1.36085	0.507497	-2.68149	0.00732954	0.0286596	-0.205504	0.507206	-0.405169	0.685354	1	-0.189411
Amigo2	ENSRNOG00000007032	adhesion molecule with Ig like domain 2 [Source:RGD Symbol;Acc:727911]	490.782	-0.101101	0.489199	-0.206666	0.836271	0.929453	-1.12598	0.489468	-2.30042	0.0214244	0.0714069	-1.53517	0.489558	-3.13582	0.00171374	0.0123831	0.308082	0.489826	0.628962	0.529374	0.765463	0.101385	0.489614	0.207071	0.835955	0.90826	-0.293624	0.489108	-0.600325	0.54829	0.733951	-0.336585	0.489733	-0.687282	0.491905	0.664359	-0.0529509	0.489086	-0.108265	0.913786	0.956382	0.139481	0.488859	0.285319	0.7754	1	1.51958
Amigo3	NA	NA	88.4534	0.35558	0.496722	0.715853	0.474082	0.720078	0.0497046	0.496428	0.100125	0.920245	0.965731	0.195654	0.496744	0.393873	0.693675	0.853613	0.20963	0.496451	0.422258	0.672837	0.862507	1.54451	0.497158	3.10667	0.00189205	0.00751379	1.43311	0.497146	2.88267	0.00394321	0.0165946	1.17261	0.497269	2.35809	0.018369	0.0535684	0.712879	0.49693	1.43457	0.151411	0.310121	-0.356298	0.499036	-0.713973	0.475244	1	0.0601256
Ammecr1l	ENSRNOG00000016250	AMME chromosomal region gene 1-like [Source:RGD Symbol;Acc:1307915]	719.143	0.284579	0.291879	0.974988	0.329566	0.588401	-0.993285	0.293317	-3.38638	0.000708206	0.00407189	0.270699	0.29172	0.927941	0.353438	0.59374	-0.979405	0.293159	-3.34086	0.000835185	0.00787505	-1.4378	0.292208	-4.92046	8.63391e-07	6.64076e-06	-0.426068	0.290307	-1.46765	0.1422	0.302855	-0.30384	0.290443	-1.04612	0.295504	0.472856	-0.819924	0.290563	-2.82184	0.00477484	0.0200124	-0.108928	0.293274	-0.37142	0.710325	1	-0.018387
Amn	ENSRNOG00000009050	amnion associated transmembrane protein [Source:RGD Symbol;Acc:1308634]	31.1591	0.541365	0.369277	1.46601	0.142645	NA	-0.209737	0.369582	-0.567496	0.570377	0.7474	-0.0152203	0.368975	-0.0412502	0.967096	0.997246	0.346849	0.369281	0.939255	0.3476	0.60736	0.115806	0.369706	0.313237	0.754101	0.858141	0.0593753	0.369908	0.160514	0.872476	NA	0.00746184	0.369229	0.0202093	0.983876	0.996069	-0.433204	0.369581	-1.17215	0.241137	0.431482	0.0462132	0.36067	0.128131	0.898045	1	0.250402
Amn1	ENSRNOG00000036917	antagonist of mitotic exit network 1 homolog [Source:RGD Symbol;Acc:1308119]	1222.12	0.104305	0.28629	0.364335	0.715608	0.870899	-0.477869	0.28663	-1.6672	0.0954746	0.224177	0.187303	0.2861	0.654677	0.512676	0.729104	-0.560867	0.28644	-1.95806	0.050223	0.176328	-0.901657	0.285921	-3.15352	0.00161313	0.00655222	-0.55001	0.285419	-1.92702	0.0539766	0.145709	-0.261897	0.285445	-0.917504	0.358878	0.542151	-0.651884	0.285436	-2.28382	0.0223823	0.0720793	0.00242791	0.286742	0.00846723	0.993244	1	0.12601
Amotl2	ENSRNOG00000008487	angiomotin like 2 [Source:RGD Symbol;Acc:70977]	1055.82	0.495655	0.365523	1.35601	0.175095	0.407748	-0.229123	0.365315	-0.627193	0.530533	0.71594	0.501598	0.365465	1.37249	0.16991	0.376152	-0.235066	0.365256	-0.643566	0.519857	0.758366	0.256615	0.365285	0.702507	0.482363	0.65244	0.175935	0.36508	0.481907	0.629872	0.789814	0.346899	0.365175	0.949953	0.342136	0.523661	-0.319245	0.365298	-0.873931	0.382156	0.583528	0.000474731	0.365725	0.00129805	0.998964	1	0.309386
Ampd1	ENSRNOG00000018656	adenosine monophosphate deaminase 1 [Source:RGD Symbol;Acc:2109]	4.21312	-0.236242	0.171894	-1.37435	0.169332	NA	0	0.171817	0	1	NA	-0.236313	0.171959	-1.37424	0.169367	NA	0	0.171882	0	1	NA	-0.115168	0.17212	-0.669117	0.503421	NA	0	0.172032	0	1	NA	0	0.172014	0	1	NA	0.236599	0.172222	1.3738	0.169503	NA	0	0.172155	0	1	1	-0.115253
Ampd2	ENSRNOG00000019240	adenosine monophosphate deaminase 2 [Source:RGD Symbol;Acc:2110]	2021.29	1.00307	0.199468	5.02872	4.93761e-07	9.75178e-06	-0.903692	0.199277	-4.53486	5.76421e-06	5.38264e-05	0.333987	0.199847	1.67121	0.09468	0.256362	-0.234608	0.199656	-1.17506	0.23997	0.490356	-0.0831648	0.199446	-0.416979	0.676694	0.805077	0.671387	0.198722	3.37853	0.000728751	0.00391503	0.639133	0.19979	3.19903	0.0013789	0.00566387	-0.42527	0.199382	-2.13294	0.0329296	0.0976427	-0.093479	0.201168	-0.464681	0.64216	1	0.148962
Ampd3	ENSRNOG00000018262	adenosine monophosphate deaminase 3 [Source:RGD Symbol;Acc:2111]	964.076	1.07005	0.356608	3.00064	0.00269413	0.0182503	-1.07911	0.356547	-3.02656	0.00247352	0.0118799	0.343814	0.356918	0.963286	0.335404	0.574815	-0.352874	0.356857	-0.988837	0.322743	0.582336	-0.329009	0.356636	-0.922535	0.356249	0.532814	0.725103	0.356036	2.0366	0.04169	0.118425	0.210073	0.356565	0.589157	0.555756	0.714535	-0.420423	0.356573	-1.17907	0.238372	0.427942	-0.0753457	0.357297	-0.210877	0.832983	1	0.024955
Amph	NA	NA	2010.79	0.0537403	0.288394	0.186343	0.852175	0.93772	-0.0905518	0.288353	-0.314031	0.753498	0.868847	-0.121917	0.288443	-0.422672	0.672535	0.840685	0.0851054	0.288403	0.295092	0.767924	0.913672	-1.51749	0.287403	-5.28001	1.29176e-07	1.12523e-06	-1.03531	0.287509	-3.60096	0.000317047	0.00187401	-1.49697	0.287535	-5.20622	1.92731e-07	1.63127e-06	-1.27823	0.287447	-4.44684	8.71444e-06	6.98318e-05	-0.189068	0.287257	-0.658185	0.510419	1	-0.391399
Amt	ENSRNOG00000050214	aminomethyltransferase [Source:RGD Symbol;Acc:1359408]	775.426	0.394896	0.361383	1.09274	0.27451	0.531487	-0.878281	0.3618	-2.42753	0.0152019	0.0540362	0.303206	0.361363	0.839063	0.401434	0.635669	-0.786591	0.36178	-2.17423	0.0296881	0.121626	-0.619542	0.361615	-1.71326	0.0866641	0.189772	-0.130807	0.360689	-0.362659	0.71686	0.845488	0.124583	0.360956	0.345148	0.729983	0.845054	-0.359334	0.360992	-0.995407	0.319538	0.52172	0.166011	0.362013	0.458578	0.646537	1	0.388692
Amtn	ENSRNOG00000003776	amelotin [Source:RGD Symbol;Acc:1592356]	0.864541	0	0.165297	0	1	NA	0	0.165506	0	1	NA	0	0.165602	0	1	NA	0	0.165812	0	1	NA	0	0.166737	0	1	NA	0	0.166529	0	1	NA	-0.327982	0.167058	-1.96328	0.0496137	NA	0	0.166861	0	1	NA	0	0.167894	0	1	1	0
Amy1a	ENSRNOG00000033529	amylase, alpha 1A (salivary) [Source:RGD Symbol;Acc:2113]	4.65355	0	0.171907	0	1	NA	0	0.171948	0	1	NA	0	0.171967	0	1	NA	0	0.172008	0	1	NA	-0.262884	0.172273	-1.52597	0.127016	NA	0	0.172145	0	1	NA	0	0.172129	0	1	NA	-0.0887294	0.172236	-0.515163	0.606439	NA	-0.0888707	0.172269	-0.515884	0.605936	1	-0.262785
Amy2a3	ENSRNOG00000055613	amylase 2a3 [Source:RGD Symbol;Acc:1593187]	3.88553	0.350466	0.171652	2.04173	0.0411785	NA	-0.350524	0.171705	-2.04143	0.0412083	NA	0	0.171518	0	1	NA	0	0.171572	0	1	NA	0	0.171805	0	1	NA	0.350803	0.171963	2.03999	0.041351	NA	0	0.17173	0	1	NA	0	0.171834	0	1	NA	0	0.171941	0	1	1	0
Amz1	ENSRNOG00000024264	archaelysin family metallopeptidase 1 [Source:RGD Symbol;Acc:1311314]	272.967	-0.0614867	0.503441	-0.122133	0.902794	0.958283	-0.476029	0.503398	-0.945632	0.344336	0.546667	-0.444757	0.503416	-0.883477	0.376978	0.614046	-0.0927589	0.503373	-0.184275	0.853798	0.953514	-0.641202	0.503446	-1.27363	0.202795	0.359003	-0.177138	0.503484	-0.351823	0.724971	0.850132	-0.517932	0.503446	-1.02877	0.303587	0.481547	-0.379868	0.503509	-0.754442	0.450584	0.646722	-0.264228	0.503246	-0.525048	0.59955	1	0.0119647
Amz2	ENSRNOG00000000246	archaelysin family metallopeptidase 2 [Source:RGD Symbol;Acc:1304846]	4209.51	-0.213057	0.199005	-1.07061	0.284346	0.544124	0.0181779	0.199051	0.0913225	0.927236	0.969127	-0.407035	0.19904	-2.04499	0.0408561	0.143763	0.212156	0.199086	1.06565	0.286582	0.542396	0.0751433	0.198858	0.377875	0.705524	0.825541	-0.261559	0.19881	-1.31562	0.188301	0.370818	-0.147572	0.199003	-0.741555	0.458357	0.63518	-0.0399784	0.198673	-0.201227	0.840521	0.916064	0.00852098	0.198978	0.0428237	0.965842	1	0.318438
Anapc1	ENSRNOG00000016965	anaphase promoting complex subunit 1 [Source:RGD Symbol;Acc:1306629]	1256.76	0.395289	0.328678	1.20266	0.229107	0.479084	-0.557932	0.328722	-1.69728	0.0896442	0.213843	0.575509	0.328565	1.75158	0.0798458	0.230113	-0.738152	0.328609	-2.24629	0.0246853	0.106695	0.799892	0.32917	2.43002	0.0150979	0.0457853	1.25458	0.328856	3.81499	0.00013619	0.000877977	1.52735	0.328959	4.64299	3.43397e-06	2.40589e-05	0.950735	0.328991	2.88985	0.0038543	0.0166539	0.0913173	0.330275	0.276489	0.782172	1	0.103103
Anapc10	ENSRNOG00000018296	anaphase promoting complex subunit 10 [Source:RGD Symbol;Acc:1308936]	283.315	0.435251	0.495204	0.878934	0.379437	0.636563	-1.03312	0.495429	-2.0853	0.037042	0.110171	0.0299363	0.495291	0.0604418	0.951804	0.991006	-0.627804	0.495517	-1.26697	0.205167	0.444228	-1.1306	0.495283	-2.28274	0.0224458	0.0636405	-0.399244	0.494869	-0.806768	0.4198	0.630749	-0.892083	0.494974	-1.80228	0.0715013	0.16269	-0.850122	0.494979	-1.71749	0.0858893	0.205273	-0.0155738	0.494936	-0.0314663	0.974898	1	0.300673
Anapc11	ENSRNOG00000036686	anaphase promoting complex subunit 11 [Source:RGD Symbol;Acc:1561880]	9170.83	-0.496549	0.102072	-4.8647	1.14632e-06	2.07771e-05	0.795755	0.101954	7.805	5.94999e-15	1.59028e-13	-0.207523	0.101893	-2.03667	0.0416828	0.145936	0.506729	0.101775	4.9789	6.39472e-07	1.71978e-05	0.841544	0.101741	8.27147	1.32322e-16	2.4642e-15	0.112038	0.102089	1.09745	0.272444	0.477317	0.487316	0.102026	4.7764	1.78461e-06	1.30639e-05	0.806025	0.101886	7.91107	2.55193e-15	5.49351e-14	0.197406	0.102641	1.92327	0.0544467	1	-0.066239
Anapc13	ENSRNOG00000008459	anaphase promoting complex subunit 13 [Source:RGD Symbol;Acc:1583270]	3519.44	-0.490938	0.140828	-3.48608	0.000490149	0.00444591	0.712065	0.140676	5.06175	4.15421e-07	4.73813e-06	-0.144046	0.140511	-1.02516	0.305286	0.542736	0.365174	0.140358	2.60173	0.00927549	0.0524207	1.6204	0.140998	11.4923	1.44146e-30	5.21088e-29	0.408993	0.14104	2.89983	0.00373361	0.0158892	1.13005	0.141221	8.00196	1.22452e-15	2.26006e-14	1.27407	0.140864	9.04467	1.50117e-19	4.36612e-18	0.373885	0.143285	2.60938	0.00907068	0.675417	0.499003
Anapc15	ENSRNOG00000019936	anaphase promoting complex subunit 15 [Source:RGD Symbol;Acc:1311634]	1702.52	-0.32497	0.26214	-1.23968	0.215093	0.460368	0.23477	0.262144	0.895575	0.37048	0.574104	-0.330247	0.262061	-1.26019	0.207599	0.428389	0.240047	0.262065	0.915982	0.359676	0.618437	0.394167	0.261899	1.50504	0.132315	0.262219	0.205236	0.262123	0.782977	0.433641	0.642376	0.355101	0.262268	1.35397	0.175747	0.325951	0.400193	0.261758	1.52886	0.126299	0.273252	-0.129865	0.263347	-0.493133	0.621918	1	-0.0457858
Anapc2	ENSRNOG00000011295	anaphase promoting complex subunit 2 [Source:RGD Symbol;Acc:1305546]	4319.7	0.847458	0.148902	5.69139	1.26012e-08	3.46156e-07	-0.878798	0.148866	-5.90329	3.56327e-09	5.48857e-08	0.326752	0.149088	2.19167	0.0284032	0.109644	-0.358092	0.149052	-2.40246	0.0162851	0.0786052	-0.265236	0.148892	-1.7814	0.0748479	0.169002	0.859849	0.148576	5.78727	7.15385e-09	9.48431e-08	0.107034	0.148748	0.719566	0.471792	0.646137	0.0448338	0.148968	0.300963	0.763443	0.872094	0.032428	0.15006	0.2161	0.82891	1	-0.246171
Anapc4	ENSRNOG00000004130	anaphase promoting complex subunit 4 [Source:RGD Symbol;Acc:1306572]	2149.15	0.305107	0.237364	1.2854	0.198653	0.438647	-1.02858	0.237835	-4.32477	1.52693e-05	0.000130381	0.325984	0.237299	1.37373	0.169525	0.375643	-1.04946	0.23777	-4.41375	1.01594e-05	0.000193769	-0.169568	0.238001	-0.712465	0.476177	0.647135	0.6523	0.237247	2.74945	0.00596957	0.0236385	0.640076	0.237274	2.69763	0.00698353	0.0233466	0.536629	0.237416	2.26029	0.023803	0.0757007	0.189265	0.238746	0.792746	0.427926	1	0.206529
Anapc5	ENSRNOG00000001316	anaphase-promoting complex subunit 5 [Source:RGD Symbol;Acc:1306125]	12069.6	0.16752	0.134176	1.24851	0.211846	0.456402	-0.401384	0.134218	-2.99053	0.00278493	0.0131346	-0.150516	0.134227	-1.12136	0.262136	0.495457	-0.0833479	0.134269	-0.620753	0.534762	0.770275	-0.397157	0.13411	-2.96143	0.00306212	0.0115733	-0.151499	0.134002	-1.13057	0.258237	0.460051	-0.313745	0.134111	-2.33943	0.0193131	0.0559065	-0.238674	0.134028	-1.78078	0.0749485	0.184787	0.0803507	0.133468	0.602021	0.54716	1	0.155739
Anapc7	ENSRNOG00000001283	anaphase promoting complex subunit 7 [Source:RGD Symbol;Acc:1311927]	1536.54	0.471871	0.24135	1.95513	0.0505678	0.174311	-0.318993	0.241132	-1.3229	0.18587	0.360994	0.780325	0.241077	3.23683	0.00120865	0.0093544	-0.627447	0.240859	-2.60504	0.00918626	0.0520334	0.244149	0.241142	1.01247	0.311313	0.485207	0.765266	0.241106	3.17398	0.00150362	0.00731727	0.838895	0.240806	3.4837	0.000494527	0.00227265	0.0996487	0.241235	0.413078	0.679549	0.818992	-0.193454	0.243417	-0.794745	0.426762	1	-0.201817
Ang	NA	NA	16.0731	-0.351367	0.368858	-0.952582	0.340802	NA	-0.0977535	0.368357	-0.265377	0.790719	0.890298	-0.449205	0.368892	-1.21771	0.223333	0.447699	0	0.368392	0	1	1	-0.452738	0.369408	-1.22558	0.220358	NA	-0.0755781	0.369169	-0.204725	0.837787	NA	-0.410627	0.369238	-1.11209	0.266098	0.439499	-0.0974392	0.370124	-0.263261	0.792349	NA	-0.321612	0.347786	-0.924742	0.3551	1	-0.23917
Ang2	ENSRNOG00000043032	angiogenin, ribonuclease A family, member 2 [Source:RGD Symbol;Acc:1359373]	1.13648	0.0167421	0.168298	0.0994785	0.920758	NA	-0.0856479	0.168322	-0.508835	0.610868	NA	-0.068929	0.168357	-0.409422	0.68223	NA	0	0.16838	0	1	NA	-0.0323495	0.169045	-0.191366	0.848239	NA	0.0704344	0.169031	0.416696	0.6769	NA	-0.0529896	0.168876	-0.313778	0.75369	NA	-0.0118273	0.169292	-0.069863	0.944303	NA	-0.0654409	0.169822	-0.38535	0.699978	1	-0.0171148
Angel1	ENSRNOG00000010567	angel homolog 1 (Drosophila) [Source:RGD Symbol;Acc:1306238]	214.001	0.726739	0.48094	1.51108	0.130768	0.341296	-1.21993	0.481383	-2.53422	0.0112697	0.0424097	0.72009	0.480875	1.49746	0.134274	0.323809	-1.21328	0.481319	-2.52075	0.0117105	0.061952	-1.00997	0.481204	-2.09884	0.0358309	0.0938011	-0.328646	0.480002	-0.684676	0.493549	0.691746	-0.0497222	0.480123	-0.103561	0.917517	0.964156	-1.10843	0.480474	-2.30696	0.0210572	0.0685496	-0.0527321	0.48094	-0.109644	0.912692	1	0.535009
Angel2	ENSRNOG00000003795	angel homolog 2 (Drosophila) [Source:RGD Symbol;Acc:1305056]	1171.93	0.0562051	0.300979	0.18674	0.851864	0.937558	-0.735171	0.301571	-2.43781	0.0147767	0.0528688	-0.0549854	0.300972	-0.182692	0.855039	0.945971	-0.62398	0.301563	-2.06915	0.0385318	0.145437	-0.631189	0.30127	-2.0951	0.0361623	0.0944076	-0.176864	0.300488	-0.58859	0.556136	0.739695	-0.233555	0.300612	-0.776931	0.4372	0.617295	-0.134418	0.300489	-0.44733	0.654637	0.8006	0.0984898	0.301919	0.326212	0.744264	1	0.280379
Angpt1	ENSRNOG00000005854	angiopoietin 1 [Source:RGD Symbol;Acc:628896]	70.3695	-0.103493	0.452943	-0.228489	0.819266	0.921332	-0.259905	0.45281	-0.573981	0.565981	0.743825	-0.370216	0.452871	-0.817487	0.41365	0.645601	0.0068188	0.452739	0.0150612	0.987983	1	-0.0355508	0.452946	-0.0784878	0.93744	0.96742	-0.170575	0.45316	-0.376412	0.706611	0.839777	-0.327283	0.452992	-0.722493	0.469991	0.644779	0.112358	0.45321	0.247917	0.804199	0.896606	0.178232	0.452085	0.394244	0.693401	1	0.39196
Angpt2	ENSRNOG00000016696	angiopoietin 2 [Source:RGD Symbol;Acc:621861]	41.7746	0.0594667	0.375039	0.158561	0.874015	NA	-0.441006	0.374878	-1.1764	0.239435	0.429432	0.000955913	0.375068	0.00254864	0.997966	1	-0.382495	0.374906	-1.02024	0.307614	0.566672	-0.108871	0.374974	-0.290342	0.771554	0.870735	0.326266	0.375168	0.869653	0.38449	0.597849	-0.0367157	0.375236	-0.0978468	0.922054	0.966016	0.0273245	0.375288	0.0728092	0.941958	0.971312	-0.237449	0.374027	-0.634844	0.52553	1	0.0058119
Angpt4	ENSRNOG00000005008	angiopoietin 4 [Source:RGD Symbol;Acc:1307539]	47.1363	-0.0809228	0.382055	-0.211809	0.832256	0.927202	0.0256319	0.382069	0.0670871	0.946512	0.97867	-0.248846	0.38203	-0.651378	0.514802	0.731136	0.193555	0.382043	0.506631	0.612414	0.824754	-0.246689	0.382403	-0.645103	0.518861	0.684188	-0.327158	0.382362	-0.855623	0.392206	0.605096	-0.405601	0.382244	-1.0611	0.288643	0.464467	-0.0307346	0.382398	-0.0803733	0.93594	0.968557	0.214347	0.381589	0.561723	0.574305	1	0.0545679
Angptl1	ENSRNOG00000004712	angiopoietin-like 1 [Source:RGD Symbol;Acc:1598128]	24.6466	0.471926	0.362671	1.30125	0.193172	NA	-0.182441	0.362988	-0.502609	0.615239	0.778452	-0.0167143	0.362373	-0.0461246	0.963211	0.995363	0.306199	0.36269	0.844244	0.398533	0.656423	-0.0284773	0.363235	-0.0783991	0.937511	0.96742	0.257535	0.363252	0.708971	0.478342	NA	-0.45754	0.362967	-1.26055	0.207469	0.368421	-0.181205	0.362945	-0.499264	0.617594	0.774944	0.0310077	0.354216	0.087539	0.930243	1	-0.0972813
Angptl2	ENSRNOG00000016678	angiopoietin-like 2 [Source:RGD Symbol;Acc:620004]	58.4751	0.362577	0.461423	0.785781	0.431996	0.686245	-0.171174	0.461637	-0.370799	0.710788	0.84274	-0.0924894	0.461167	-0.200555	0.841046	0.938903	0.283892	0.461381	0.615309	0.538351	0.772964	-0.727393	0.462164	-1.57389	0.115514	0.236788	-0.0848981	0.462047	-0.183744	0.854215	0.928697	-0.857639	0.461838	-1.85701	0.0633094	0.14744	-0.593936	0.461904	-1.28584	0.198497	0.375903	-0.144983	0.460803	-0.314631	0.753042	1	-0.467161
Angptl4	ENSRNOG00000007545	angiopoietin-like 4 [Source:RGD Symbol;Acc:735058]	123.451	0.0755724	0.507576	0.148889	0.881641	0.950891	-0.703745	0.507619	-1.38637	0.165635	0.332248	-0.0666243	0.507578	-0.131259	0.89557	0.965925	-0.561548	0.50762	-1.10624	0.268624	0.522005	-0.373493	0.507605	-0.735794	0.461856	0.634194	-0.342904	0.507523	-0.675642	0.499268	0.696257	-0.216084	0.507547	-0.425741	0.670296	0.802392	-0.544211	0.507517	-1.0723	0.283585	0.482832	-0.124835	0.507324	-0.246066	0.805631	1	0.666995
Angptl6	ENSRNOG00000020603	angiopoietin-like 6 [Source:RGD Symbol;Acc:1311141]	71.0928	-0.375804	0.495407	-0.758576	0.448106	0.70009	0.522999	0.495495	1.05551	0.291193	0.489764	0.348143	0.495758	0.702243	0.482528	0.705548	-0.200947	0.495846	-0.405261	0.685286	0.870426	0.389452	0.495795	0.785511	0.432154	0.606832	-0.513191	0.495637	-1.03542	0.300474	0.507089	0.624657	0.495791	1.25992	0.207698	0.36858	0.0926703	0.495809	0.186907	0.851733	0.922167	0.227583	0.494733	0.460011	0.645509	1	0.37529
Ank1	ENSRNOG00000018241	ankyrin 1, erythrocytic [Source:RGD Symbol;Acc:1309620]	393.523	0.0845624	0.407628	0.20745	0.835659	0.929186	-1.34517	0.409288	-3.2866	0.00101405	0.00553578	0.0292073	0.407572	0.0716616	0.942871	0.987028	-1.28981	0.409232	-3.15178	0.00162277	0.0134012	-1.22841	0.408958	-3.00377	0.00266661	0.0102423	0.695927	0.407676	1.70706	0.087811	0.210941	-0.0952049	0.407192	-0.233809	0.815134	0.903913	0.152944	0.407252	0.37555	0.707251	0.83749	-0.456027	0.410028	-1.11219	0.266059	1	-0.576199
Ank3	ENSRNOG00000053288	ankyrin 3, node of Ranvier (ankyrin G) [Source:RGD Symbol;Acc:620157]	3905.37	0.970914	0.1589	6.1102	9.95035e-10	3.48099e-08	-0.688513	0.158701	-4.33843	1.43502e-05	0.000123539	0.684284	0.158957	4.30484	1.67107e-05	0.000244228	-0.401883	0.158757	-2.53143	0.0113599	0.0605522	1.24241	0.159443	7.7922	6.58503e-15	1.08932e-13	1.82145	0.159099	11.4486	2.39079e-30	1.76422e-28	1.62058	0.159396	10.167	2.78255e-24	8.78741e-23	1.07869	0.159585	6.75934	1.38625e-11	2.21431e-10	0.228028	0.161239	1.41423	0.157295	1	0.109413
Ankef1	ENSRNOG00000005792	ankyrin repeat and EF-hand domain containing 1 [Source:RGD Symbol;Acc:1304809]	4.85498	0.150829	0.202747	0.743928	0.45692	NA	-0.150911	0.202807	-0.744109	0.456811	NA	0	0.202725	0	1	NA	0	0.202786	0	1	NA	-0.0797137	0.203091	-0.392502	0.694687	NA	0.0173289	0.203165	0.0852944	0.932027	NA	-0.13176	0.20304	-0.648935	0.51638	NA	-0.00464485	0.203085	-0.0228715	0.981753	NA	0.0999591	0.180658	0.553306	0.580054	1	0.0422516
Ankfy1	ENSRNOG00000016212	ankyrin repeat and FYVE domain containing 1 [Source:RGD Symbol;Acc:1309598]	1478.72	0.463617	0.22108	2.09705	0.035989	0.135706	-0.958903	0.221574	-4.32768	1.50687e-05	0.000128755	0.997187	0.220677	4.51876	6.22041e-06	0.000103195	-1.49247	0.221172	-6.74801	1.49883e-11	1.29923e-09	-0.202607	0.221744	-0.913699	0.360875	0.537182	1.06921	0.221128	4.83526	1.32971e-06	1.25717e-05	1.89746	0.22136	8.57183	1.01856e-17	2.16254e-16	0.774463	0.221537	3.49586	0.000472533	0.0026339	0.168577	0.224701	0.750228	0.453117	1	-0.312389
Ankh	ENSRNOG00000010960	ANKH inorganic pyrophosphate transport regulator [Source:RGD Symbol;Acc:619925]	2719.29	0.0781778	0.22377	0.349367	0.726814	0.876753	-0.0854363	0.223695	-0.381932	0.702512	0.838214	-0.148566	0.223877	-0.663605	0.506943	0.724971	0.141308	0.223803	0.631394	0.527783	0.76434	-1.55544	0.22263	-6.98668	2.81474e-12	3.89594e-11	-1.02857	0.222765	-4.61731	3.88754e-06	3.43468e-05	-1.5866	0.222834	-7.1201	1.0785e-12	1.55813e-11	-1.1876	0.222749	-5.33156	9.73707e-08	1.03598e-06	-0.0808002	0.22287	-0.362544	0.716946	1	-0.441164
Ankhd1	ENSRNOG00000030247	ankyrin repeat and KH domain containing 1 [Source:RGD Symbol;Acc:4892133]	1211.96	-0.193895	0.308525	-0.628456	0.529705	0.756502	0.58154	0.308197	1.88691	0.0591722	0.157238	0.625051	0.307868	2.03026	0.0423303	0.14745	-0.237405	0.307538	-0.771954	0.440142	0.690827	0.413325	0.307658	1.34346	0.179123	0.328059	-0.310461	0.308083	-1.00772	0.313589	0.522707	0.482452	0.307521	1.56884	0.116684	0.239017	0.0656523	0.307905	0.213223	0.831153	0.91257	0.181931	0.309133	0.58852	0.556183	1	0.142022
Ankib1	ENSRNOG00000005502	ankyrin repeat and IBR domain containing 1 [Source:RGD Symbol;Acc:1597088]	1908	0.992576	0.199786	4.9682	6.75774e-07	1.29017e-05	-0.410836	0.199169	-2.06275	0.0391367	0.114718	0.762077	0.199854	3.81318	0.000137191	0.00152194	-0.180337	0.199237	-0.905136	0.365394	0.624558	0.924684	0.199788	4.62833	3.68624e-06	2.54537e-05	1.20434	0.199427	6.03899	1.55086e-09	2.25201e-08	0.808876	0.19953	4.0539	5.03704e-05	0.000288888	0.260064	0.200152	1.29933	0.193829	0.369675	0.0482354	0.202505	0.238194	0.811731	1	0.131014
Ankle2	ENSRNOG00000060144	ankyrin repeat and LEM domain containing 2 [Source:RGD Symbol;Acc:1310191]	322.907	-0.123348	0.437602	-0.281872	0.778042	0.901886	-0.564415	0.438273	-1.28782	0.19781	0.377338	0.256745	0.437179	0.587276	0.557018	0.76176	-0.944508	0.437852	-2.15714	0.0309948	0.125346	-0.594931	0.437797	-1.35892	0.174172	0.321434	0.0257022	0.437279	0.0587777	0.953129	0.978995	-0.0323395	0.436707	-0.074053	0.940968	0.975103	-0.361205	0.436775	-0.826983	0.408247	0.609251	-0.507502	0.438713	-1.1568	0.247356	1	-0.055886
Ankmy2	ENSRNOG00000005623	ankyrin repeat and MYND domain containing 2 [Source:RGD Symbol;Acc:1306017]	3178.55	-0.553569	0.247126	-2.24003	0.0250892	0.103641	0.17869	0.24724	0.722739	0.46984	0.66495	-0.888574	0.247247	-3.59387	0.000325801	0.00314758	0.513695	0.247361	2.0767	0.0378288	0.143257	-0.257603	0.246866	-1.0435	0.296719	0.470819	-0.375198	0.247008	-1.51897	0.12877	0.28172	-0.720559	0.247185	-2.91506	0.00355619	0.013039	0.0350136	0.246687	0.141936	0.887131	0.943356	-0.143319	0.246888	-0.5805	0.561577	1	-0.0610785
Ankra2	ENSRNOG00000048118	ankyrin repeat, family A (RFXANK-like), 2 [Source:RGD Symbol;Acc:1303108]	19.089	0.0725112	0.492575	0.147209	0.882967	NA	0.270474	0.493204	0.548402	0.583416	0.755974	0.401317	0.493211	0.813681	0.415828	0.647731	-0.0583312	0.493839	-0.118118	0.905974	0.977404	0.539202	0.493625	1.09233	0.274688	0.447345	0.173003	0.493247	0.350743	0.725781	NA	0.542542	0.493555	1.09925	0.271657	0.445471	0.00264245	0.493449	0.00535506	0.995727	NA	-0.0936899	0.489966	-0.191217	0.848355	1	0.0913504
Ankrd1	ENSRNOG00000018598	ankyrin repeat domain 1 [Source:RGD Symbol;Acc:61989]	10.1621	-0.272841	0.319529	-0.853884	0.393169	NA	0.0627894	0.319357	0.196612	0.844131	NA	-0.155253	0.319876	-0.485352	0.627427	NA	-0.0547987	0.319704	-0.171404	0.863906	NA	-0.218261	0.320363	-0.681294	0.495685	NA	-0.0875	0.319958	-0.273474	0.784489	NA	-0.326931	0.320452	-1.02022	0.307626	NA	0.300828	0.320421	0.938853	0.347806	NA	0.104128	0.309132	0.336841	0.736237	1	-0.177561
Ankrd10	ENSRNOG00000013618	ankyrin repeat domain 10 [Source:RGD Symbol;Acc:1310501]	1072.19	0.415392	0.426239	0.974552	0.329782	0.588604	-0.753429	0.426338	-1.76721	0.0771931	0.191992	-0.489956	0.426521	-1.14873	0.250669	0.482048	0.151919	0.42662	0.356099	0.721766	0.890944	-0.526889	0.42626	-1.23607	0.216431	0.376845	-0.078024	0.425973	-0.183167	0.854667	0.929017	-0.764315	0.42634	-1.79274	0.0730147	0.165475	-0.642396	0.426048	-1.5078	0.131605	0.281073	-0.148978	0.425528	-0.350101	0.726263	1	0.30456
Ankrd12	ENSRNOG00000012733	ankyrin repeat domain 12 [Source:RGD Symbol;Acc:1310118]	9634.5	-0.173442	0.119248	-1.45446	0.14582	0.365988	0.677483	0.119122	5.68728	1.29077e-08	1.83681e-07	0.225615	0.119118	1.89405	0.0582187	0.184832	0.278427	0.118992	2.33989	0.0192896	0.0893003	2.07493	0.119468	17.3681	1.43803e-67	1.37014e-65	1.2746	0.119568	10.66	1.56589e-26	9.42181e-25	1.59528	0.1195	13.3496	1.19163e-40	7.64165e-39	1.67604	0.11955	14.0196	1.1833e-44	1.14627e-42	0.227981	0.120146	1.89753	0.0577575	1	0.122842
Ankrd13a	ENSRNOG00000001204	ankyrin repeat domain 13a [Source:RGD Symbol;Acc:1308577]	2602.42	0.168403	0.250879	0.671252	0.50206	0.739786	-0.488701	0.251004	-1.94698	0.0515369	0.141478	-0.126351	0.25096	-0.503469	0.614635	0.802383	-0.193948	0.251086	-0.772435	0.439857	0.690466	-0.368021	0.25084	-1.46715	0.142335	0.277909	0.318696	0.250704	1.2712	0.203656	0.392171	-0.102094	0.250815	-0.407048	0.683973	0.813095	-0.0513782	0.250655	-0.204975	0.837591	0.914949	-0.201569	0.251177	-0.802499	0.422265	1	-0.197915
Ankrd13c	ENSRNOG00000011340	ankyrin repeat domain 13C [Source:RGD Symbol;Acc:1595074]	4093.91	-0.247007	0.159544	-1.5482	0.121574	0.324851	0.421482	0.1594	2.64417	0.00818921	0.0326038	-0.141338	0.15939	-0.886745	0.375216	0.612321	0.315813	0.159246	1.98318	0.0473474	0.169258	-0.0422929	0.158862	-0.266224	0.790067	0.88175	-0.316422	0.159232	-1.98717	0.0469032	0.130283	-0.278899	0.159134	-1.75261	0.0796687	0.176918	-0.0438248	0.159001	-0.275626	0.782835	0.884331	0.0255787	0.160014	0.159853	0.872997	1	-0.147282
Ankrd13d	ENSRNOG00000028247	ankyrin repeat domain 13 family, member D [Source:RGD Symbol;Acc:1309156]	4517.74	0.846022	0.186578	4.53442	5.77614e-06	8.90521e-05	-0.30882	0.186313	-1.65754	0.0974107	0.227195	0.615724	0.186612	3.2995	0.000968586	0.00783408	-0.0785226	0.186347	-0.421379	0.673478	0.862765	0.571811	0.186423	3.06727	0.00216022	0.00847741	1.01935	0.186399	5.46865	4.53477e-08	5.37983e-07	0.654451	0.186461	3.50985	0.000448356	0.00208409	0.202034	0.186681	1.08224	0.279144	0.478219	0.0286968	0.187055	0.153414	0.878072	1	-0.138682
Ankrd16	ENSRNOG00000028168	ankyrin repeat domain 16 [Source:RGD Symbol;Acc:1311405]	302.677	0.217146	0.386524	0.561793	0.574257	0.787893	-0.109016	0.386022	-0.28241	0.777629	0.883887	1.12132	0.384697	2.91481	0.00355899	0.0221013	-1.01319	0.384191	-2.6372	0.00835925	0.0483291	-0.651597	0.384109	-1.69639	0.0898129	0.194827	-0.748693	0.383841	-1.95053	0.051113	0.139402	0.15268	0.382211	0.399466	0.68955	0.81738	-1.35025	0.383899	-3.51719	0.000436136	0.00244807	-0.381859	0.386332	-0.988422	0.322946	1	0.204655
Ankrd17	ENSRNOG00000002940	ankyrin repeat domain 17 [Source:RGD Symbol;Acc:1562348]	6928.7	-0.177066	0.139774	-1.2668	0.205225	0.447526	0.443738	0.13967	3.17705	0.00148784	0.00768308	0.179246	0.139617	1.28384	0.199198	0.417635	0.087425	0.139513	0.626643	0.530893	0.766623	1.14423	0.139731	8.18876	2.63939e-16	4.79893e-15	0.547149	0.139832	3.9129	9.11959e-05	0.00060934	0.91533	0.139763	6.54917	5.7856e-11	7.16445e-10	0.87184	0.139758	6.23823	4.42557e-10	6.08238e-09	0.147599	0.140337	1.05175	0.292915	1	0.153313
Ankrd2	ENSRNOG00000013840	ankyrin repeat domain 2 (stretch responsive muscle) [Source:RGD Symbol;Acc:1305104]	0.19908	0	0.146958	0	1	NA	0	0.147537	0	1	NA	0	0.1478	0	1	NA	0	0.148379	0	1	NA	-0.263862	0.152477	-1.7305	0.0835401	NA	0	0.150496	0	1	NA	0	0.150155	0	1	NA	0	0.151494	0	1	NA	0	0.163848	0	1	1	-0.155394
Ankrd22	ENSRNOG00000019190	ankyrin repeat domain 22 [Source:RGD Symbol;Acc:1307862]	1.34197	0	0.168035	0	1	NA	0	0.168177	0	1	NA	0	0.168242	0	1	NA	0	0.168385	0	1	NA	0	0.169008	0	1	NA	0	0.168866	0	1	NA	0	0.168806	0	1	NA	-0.337204	0.169427	-1.99026	0.0465626	NA	-0.337675	0.170055	-1.98568	0.0470691	1	0
Ankrd23	ENSRNOG00000016151	ankyrin repeat domain 23 [Source:RGD Symbol;Acc:1310398]	7.62508	0.170531	0.239368	0.712421	0.476204	NA	-0.343713	0.239297	-1.43635	0.150904	NA	-0.210039	0.239172	-0.878192	0.379839	NA	0.0368562	0.239101	0.154145	0.877496	NA	0.0530574	0.239397	0.221629	0.824603	NA	0.373492	0.23961	1.55875	0.119055	NA	0.0160119	0.239268	0.0669206	0.946645	NA	0.215999	0.239584	0.90156	0.36729	NA	0.0106292	0.221634	0.0479582	0.96175	1	0.0189889
Ankrd24	ENSRNOG00000006759	ankyrin repeat domain 24 [Source:RGD Symbol;Acc:1311385]	2115.96	-0.413411	0.256856	-1.60951	0.107505	0.297722	0.416083	0.256813	1.62018	0.105194	0.240047	-0.0127701	0.25655	-0.0497761	0.960301	0.994348	0.0154418	0.256508	0.0602003	0.951996	0.994608	0.250304	0.256419	0.976152	0.328989	0.504631	-0.0765697	0.256749	-0.298228	0.765529	0.875601	0.272279	0.256514	1.06146	0.288481	0.464385	0.423673	0.256457	1.65203	0.0985291	0.227602	0.0867622	0.257462	0.336991	0.736124	1	-0.0891384
Ankrd27	ENSRNOG00000052814	ankyrin repeat domain 27 (VPS9 domain) [Source:RGD Symbol;Acc:1307106]	1235.64	0.304261	0.206798	1.47129	0.141212	0.358086	0.211899	0.205988	1.0287	0.303623	0.503063	0.709753	0.206198	3.44209	0.000577231	0.00507713	-0.193593	0.205385	-0.942586	0.345893	0.605306	0.255692	0.205404	1.24482	0.213197	0.372917	0.588571	0.206383	2.85183	0.00434681	0.0179708	0.456254	0.205372	2.2216	0.0263104	0.0727761	0.252813	0.206567	1.22388	0.220998	0.40473	-0.0314289	0.210634	-0.149211	0.881387	1	-0.543591
Ankrd29	ENSRNOG00000011856	ankyrin repeat domain 29 [Source:RGD Symbol;Acc:1587260]	526.785	-0.231793	0.471642	-0.491459	0.623102	0.818096	-0.701788	0.471967	-1.48694	0.13703	0.290199	-0.880133	0.471856	-1.86526	0.0621449	0.193629	-0.0534471	0.47218	-0.113192	0.909878	0.979216	-1.10391	0.471732	-2.34011	0.0192781	0.0561485	-0.518292	0.47146	-1.09933	0.271623	0.476162	-0.861008	0.47177	-1.82506	0.0679922	0.156261	0.0370117	0.47141	0.0785128	0.93742	0.968877	0.323039	0.471403	0.685271	0.493173	1	0.116012
Ankrd32	NA	NA	696.904	0.752906	0.338263	2.2258	0.0260276	0.106405	-0.0113715	0.337499	-0.0336934	0.973122	0.991502	0.171265	0.338662	0.50571	0.61306	0.801481	0.57027	0.337899	1.6877	0.0914697	0.263931	0.827107	0.337734	2.44899	0.0143258	0.043692	0.748369	0.337695	2.21611	0.0266838	0.0828915	0.291887	0.338397	0.862559	0.38838	0.569993	0.087204	0.338341	0.25774	0.796608	0.891065	0.091447	0.340611	0.26848	0.78833	1	0.0898226
Ankrd33b	ENSRNOG00000010888	ankyrin repeat domain 33B [Source:RGD Symbol;Acc:1564227]	1815.97	-0.000312564	0.247605	-0.00126235	0.998993	1	0.716657	0.246965	2.90185	0.00370963	0.0166761	0.456753	0.247101	1.84845	0.0645375	0.19872	0.259592	0.24646	1.05328	0.292211	0.548782	-0.183278	0.245991	-0.745058	0.456236	0.628698	0.00399664	0.247124	0.0161726	0.987097	0.996119	-0.63526	0.246144	-2.58085	0.00985578	0.0314407	-0.358227	0.24679	-1.45154	0.146628	0.303525	-0.362118	0.248078	-1.45969	0.144375	1	-0.902914
Ankrd34a	ENSRNOG00000033741	ankyrin repeat domain 34A [Source:RGD Symbol;Acc:1308412]	3263.5	-0.415928	0.185073	-2.24738	0.024616	0.102091	0.132678	0.185202	0.716394	0.473748	0.668074	-0.00204018	0.184708	-0.0110455	0.991187	1	-0.28121	0.184837	-1.52139	0.128161	0.329016	-0.254109	0.184639	-1.37625	0.168745	0.314011	-0.339216	0.184825	-1.83533	0.0664561	0.171407	-0.170363	0.184441	-0.923671	0.355658	0.538781	-0.211637	0.18435	-1.14802	0.250962	0.443021	-0.288177	0.185495	-1.55356	0.120289	1	-0.0475424
Ankrd34b	ENSRNOG00000040166	ankyrin repeat domain 34B [Source:RGD Symbol;Acc:1594383]	827.298	-0.91656	0.321898	-2.84736	0.00440833	0.0267465	-1.08727	0.324802	-3.34749	0.000815475	0.00459011	-0.858835	0.321663	-2.66998	0.00758556	0.0407401	-1.145	0.32457	-3.52773	0.000419135	0.00447968	-1.08077	0.324174	-3.33392	0.000856325	0.00373893	-1.08008	0.32148	-3.3597	0.000780274	0.00415379	-0.120253	0.321982	-0.373475	0.708795	0.829733	-0.288613	0.320393	-0.900808	0.367691	0.568796	-0.12481	0.322647	-0.386832	0.698881	1	1.08384
Ankrd34c	ENSRNOG00000013937	ankyrin repeat domain 34C [Source:RGD Symbol;Acc:1305403]	65.5081	0.684239	0.501425	1.36459	0.172382	0.404535	0.0780331	0.501939	0.155463	0.876456	0.942806	0.626417	0.501456	1.2492	0.211593	0.433517	0.135855	0.501969	0.270644	0.786665	0.921703	-0.621513	0.502348	-1.23722	0.216007	0.376374	-0.279249	0.502173	-0.556081	0.578155	0.755485	-0.980044	0.502304	-1.9511	0.0510453	0.124291	-1.10828	0.50182	-2.20852	0.027208	0.0839514	-0.142846	0.501316	-0.284943	0.775688	1	-0.415155
Ankrd37	ENSRNOG00000031335	ankyrin repeat domain 37 [Source:RGD Symbol;Acc:1565715]	551.75	-0.237585	0.399625	-0.59452	0.552164	0.772193	-0.149131	0.399834	-0.372982	0.709162	0.841686	-0.568934	0.399793	-1.42307	0.154716	0.354664	0.182218	0.400003	0.455542	0.648719	0.848042	0.484241	0.399898	1.21091	0.22593	0.388867	-0.0349992	0.399428	-0.0876232	0.930176	0.96839	-0.136666	0.399841	-0.341801	0.732501	0.846914	0.293915	0.39922	0.736222	0.461596	0.656095	0.0910392	0.400882	0.227098	0.820348	1	0.666084
Ankrd39	ENSRNOG00000023995	ankyrin repeat domain 39 [Source:RGD Symbol;Acc:1559504]	263.562	-0.846468	0.423224	-2.00005	0.0454949	0.16168	1.00623	0.423014	2.37872	0.017373	0.0602876	-1.35067	0.423961	-3.18583	0.00144341	0.0108571	1.51043	0.423752	3.56442	0.000364668	0.00398913	0.660667	0.421874	1.56603	0.117342	0.239649	-0.350207	0.423165	-0.827591	0.407902	0.619938	-0.659709	0.424311	-1.55478	0.119999	0.244253	0.896433	0.422291	2.12278	0.033772	0.099453	0.397012	0.425918	0.932133	0.351268	1	0.00461561
Ankrd40	ENSRNOG00000002935	ankyrin repeat domain 40 [Source:RGD Symbol;Acc:1594678]	4904.77	-0.00978075	0.182651	-0.0535488	0.957295	0.980802	0.412057	0.182416	2.25889	0.0238905	0.077672	0.586029	0.182321	3.21427	0.00130778	0.00996212	-0.183753	0.182086	-1.00915	0.312901	0.572892	-0.306831	0.181922	-1.68661	0.091679	0.198245	-0.426254	0.182246	-2.33889	0.0193409	0.0638151	-0.126447	0.181889	-0.695191	0.486936	0.659393	-0.544491	0.182152	-2.98921	0.00279698	0.012555	-0.127989	0.182213	-0.702411	0.482423	1	-0.292568
Ankrd42	ENSRNOG00000009664	ankyrin repeat domain 42 [Source:RGD Symbol;Acc:1310789]	949.949	0.159752	0.29867	0.534876	0.592735	0.800232	0.260541	0.298183	0.873762	0.382248	0.585483	0.236668	0.298478	0.792918	0.427825	0.659311	0.183624	0.29799	0.616209	0.537756	0.772739	0.237606	0.297687	0.798174	0.424769	0.59989	-0.13619	0.297928	-0.457125	0.647581	0.800555	-0.0278796	0.297897	-0.0935883	0.925436	0.967704	0.108353	0.298251	0.363294	0.716385	0.843318	0.403344	0.300262	1.3433	0.179174	1	0.112995
Ankrd44	ENSRNOG00000021384	ankyrin repeat domain 44 [Source:RGD Symbol;Acc:1561893]	422.906	0.971946	0.375681	2.58716	0.00967717	0.0500235	-1.75146	0.376713	-4.64931	3.33041e-06	3.24244e-05	0.132843	0.376243	0.353077	0.72403	0.871914	-0.912352	0.377272	-2.41829	0.0155938	0.0762343	0.86262	0.379432	2.27345	0.0229989	0.064939	1.50711	0.375652	4.01197	6.02137e-05	0.000417546	0.594195	0.376367	1.57876	0.11439	0.235507	0.798343	0.376589	2.11993	0.0340118	0.100086	0.261755	0.38018	0.688502	0.491137	1	1.10036
Ankrd46	ENSRNOG00000025504	ankyrin repeat domain 46 [Source:RGD Symbol;Acc:1309382]	8930.02	-0.188682	0.189538	-0.995485	0.319501	0.579368	0.408893	0.189442	2.1584	0.0308965	0.0954148	-0.310796	0.189539	-1.63975	0.101057	0.267576	0.531007	0.189443	2.80299	0.00506312	0.0330761	-0.935009	0.189015	-4.94675	7.54633e-07	5.84817e-06	-1.2496	0.189197	-6.60474	3.98213e-11	7.01536e-10	-1.4766	0.18921	-7.80406	5.99461e-15	1.05085e-13	-1.17765	0.189089	-6.22803	4.72325e-10	6.44723e-09	-0.116764	0.188003	-0.621078	0.534549	1	-0.0943253
Ankrd49	ENSRNOG00000009233	ankyrin repeat domain 49 [Source:RGD Symbol;Acc:1311759]	1283.23	0.372083	0.325715	1.14236	0.253305	0.507571	-0.299977	0.325604	-0.921293	0.356897	0.56017	-0.0473426	0.325911	-0.145262	0.884504	0.960875	0.119448	0.325801	0.366629	0.713895	0.886568	-0.365592	0.325308	-1.12383	0.261084	0.431372	-0.188618	0.325127	-0.580136	0.561823	0.743652	-0.436344	0.325473	-1.34065	0.180035	0.332188	-0.351235	0.32538	-1.07946	0.280382	0.479151	0.209209	0.325949	0.641847	0.520973	1	0.122854
Ankrd50	ENSRNOG00000010534	ankyrin repeat domain 50 [Source:RGD Symbol;Acc:1311665]	293.112	0.516025	0.507789	1.01622	0.309525	0.570217	-0.199174	0.507796	-0.392232	0.694887	0.832526	1.25916	0.507797	2.47964	0.0131514	0.0618871	-0.942303	0.507803	-1.85565	0.063504	0.207428	0.264049	0.507797	0.519989	0.603071	0.749252	0.196389	0.507801	0.386743	0.698946	0.834668	1.1275	0.507805	2.22034	0.0263957	0.0729356	-0.152695	0.507793	-0.300703	0.763641	0.872094	0.166764	0.507485	0.328608	0.742452	1	0.266538
Ankrd52	ENSRNOG00000030597	ankyrin repeat domain 52 [Source:RGD Symbol;Acc:1307124]	362.576	0.229103	0.458204	0.500003	0.617073	0.815197	-0.726431	0.458462	-1.5845	0.113081	0.253173	0.0770513	0.458219	0.168154	0.866462	0.950809	-0.574379	0.458477	-1.2528	0.210279	0.450768	0.0199832	0.45856	0.0435781	0.965241	0.983334	0.266732	0.457966	0.582426	0.560279	0.74263	0.231561	0.458116	0.505463	0.613233	0.758784	0.0511392	0.458019	0.111653	0.911099	0.955055	0.0134563	0.458946	0.0293199	0.976609	1	0.47755
Ankrd54	ENSRNOG00000010821	ankyrin repeat domain 54 [Source:RGD Symbol;Acc:1309552]	1038.66	-0.249997	0.413089	-0.60519	0.545053	0.767238	-0.3315	0.413265	-0.802151	0.422466	0.622944	-1.31572	0.413564	-3.18141	0.00146561	0.0109912	0.734218	0.413739	1.77459	0.0759654	0.235465	-0.211326	0.413132	-0.511521	0.608986	0.753402	-0.0417624	0.412996	-0.101121	0.919455	0.963469	-1.02924	0.413543	-2.48883	0.0128164	0.0394151	-0.00709886	0.412831	-0.0171955	0.986281	0.993143	-0.215236	0.412765	-0.52145	0.602054	1	0.16186
Ankrd55	ENSRNOG00000013555	ankyrin repeat domain 55 [Source:RGD Symbol;Acc:1307735]	182.771	-1.31103	0.490822	-2.67109	0.00756046	0.0410062	0.811085	0.491027	1.65181	0.0985725	0.229038	-1.45675	0.490848	-2.96783	0.00299911	0.0193312	0.956806	0.491053	1.94848	0.0513576	0.178912	-0.445914	0.489938	-0.910144	0.362747	0.538989	-1.00514	0.490722	-2.04828	0.0405323	0.115963	-1.28311	0.490774	-2.61447	0.0089367	0.0289424	-0.258344	0.489597	-0.527666	0.597731	0.761556	-0.56042	0.490607	-1.1423	0.25333	1	-0.250038
Ankrd6	ENSRNOG00000007110	ankyrin repeat domain 6 [Source:RGD Symbol;Acc:1583731]	2527.94	-0.0239994	0.215144	-0.11155	0.91118	0.961722	-0.1545	0.215206	-0.71792	0.472807	0.667512	-0.579529	0.21547	-2.6896	0.00715378	0.0389922	0.401029	0.215532	1.86065	0.0627937	0.205749	0.0352348	0.215001	0.163882	0.869824	0.927314	-0.293731	0.214751	-1.36778	0.171382	0.347534	-0.380137	0.215377	-1.76498	0.0775671	0.173502	-0.212523	0.214688	-0.989914	0.322216	0.524344	0.0571661	0.215762	0.264949	0.791049	1	0.483096
Ankrd61	ENSRNOG00000001048	ankyrin repeat domain 61 [Source:RGD Symbol;Acc:1586393]	13.7571	-0.404986	0.36122	-1.12116	0.262219	NA	0.0780666	0.360871	0.216328	0.828732	0.913873	-0.405782	0.361421	-1.12274	0.261548	0.494718	0.0788627	0.361072	0.218412	0.827108	0.942679	-0.274581	0.362057	-0.758391	0.448217	NA	-0.397569	0.361826	-1.09878	0.271863	NA	-0.384833	0.361817	-1.06361	0.287505	0.463407	0.0186129	0.362603	0.0513313	0.959062	NA	0.00970601	0.339472	0.0285915	0.97719	1	0.0387273
Ankrd65	ENSRNOG00000043331	ankyrin repeat domain 65 [Source:RGD Symbol;Acc:1588232]	0.19908	0	0.146958	0	1	NA	0	0.147537	0	1	NA	0	0.1478	0	1	NA	0	0.148379	0	1	NA	-0.263862	0.152477	-1.7305	0.0835401	NA	0	0.150496	0	1	NA	0	0.150155	0	1	NA	0	0.151494	0	1	NA	0	0.163848	0	1	1	-0.155394
Ankrd7	ENSRNOG00000055481	ankyrin repeat domain 7 [Source:RGD Symbol;Acc:1564660]	0.264257	-0.220711	0.153212	-1.44055	0.149711	NA	0	0.152427	0	1	NA	-0.221382	0.153929	-1.43821	0.150374	NA	0	0.153144	0	1	NA	0	0.155394	0	1	NA	-0.0589903	0.155196	-0.380101	0.70387	NA	0	0.154643	0	1	NA	0.224366	0.15702	1.4289	0.153033	NA	0.0427147	0.163848	0.260696	0.794327	1	0.0377028
Ankrd9	ENSRNOG00000008056	ankyrin repeat domain 9 [Source:RGD Symbol;Acc:1307662]	888.554	-0.0734146	0.324018	-0.226576	0.820753	0.922462	0.366911	0.323713	1.13345	0.257027	0.450181	0.444712	0.323509	1.37465	0.169239	0.375161	-0.151216	0.323203	-0.467868	0.639879	0.843132	0.182802	0.323144	0.565697	0.5716	0.725928	0.347915	0.323896	1.07416	0.282751	0.488268	0.362416	0.323159	1.12148	0.262084	0.435408	0.527929	0.323764	1.6306	0.102975	0.234751	0.106329	0.325971	0.326191	0.74428	1	-0.530749
Anks1a	ENSRNOG00000000498	ankyrin repeat and sterile alpha motif domain containing 1A [Source:RGD Symbol;Acc:1309183]	1398.07	0.544811	0.248094	2.19598	0.0280931	0.112992	-0.466567	0.247972	-1.88153	0.0599004	0.158663	0.603301	0.248	2.43266	0.0149883	0.0681579	-0.525057	0.247879	-2.1182	0.0341582	0.133666	1.43887	0.249219	5.77351	7.76374e-09	7.78337e-08	2.01131	0.249096	8.07447	6.77696e-16	1.96331e-14	1.91898	0.249081	7.70426	1.31601e-14	2.26587e-13	1.33402	0.249058	5.35627	8.49576e-08	9.10358e-07	-0.132238	0.252644	-0.523417	0.600684	1	-0.10569
Anks1b	ENSRNOG00000024870	ankyrin repeat and sterile alpha motif domain containing 1B [Source:RGD Symbol;Acc:1565556]	7725.08	0.42797	0.146171	2.92787	0.00341298	0.022063	-0.12713	0.146027	-0.870595	0.383975	0.587128	0.101962	0.146243	0.697209	0.485672	0.708169	0.198878	0.146098	1.36126	0.173432	0.398844	-0.0411566	0.145898	-0.282092	0.777873	0.874863	0.0105409	0.145866	0.0722639	0.942392	0.974032	-0.31302	0.145986	-2.14417	0.032019	0.0856034	-0.285964	0.146013	-1.95849	0.0501731	0.136045	0.131454	0.145895	0.901015	0.36758	1	0.0754264
Anks3	ENSRNOG00000003186	ankyrin repeat and sterile alpha motif domain containing 3 [Source:RGD Symbol;Acc:1305833]	2000.49	0.325733	0.302846	1.07557	0.282118	0.541153	-0.346632	0.302816	-1.14469	0.252336	0.445326	0.279827	0.302817	0.92408	0.355444	0.595678	-0.300726	0.302787	-0.993192	0.320616	0.579748	0.0293824	0.302751	0.0970515	0.922686	0.959024	0.508564	0.302683	1.68019	0.0929206	0.220428	0.267616	0.302656	0.884223	0.376576	0.558767	-0.231119	0.302639	-0.763681	0.445057	0.641703	-0.413738	0.302915	-1.36585	0.171985	1	-0.13248
Anks4b	ENSRNOG00000046181	ankyrin repeat and sterile alpha motif domain containing 4B [Source:RGD Symbol;Acc:1584204]	17.8555	-0.107324	0.273751	-0.39205	0.695021	NA	-0.137701	0.273664	-0.503176	0.614841	0.778398	-0.245041	0.273741	-0.895156	0.370704	0.608751	0	0.273655	0	1	1	0	0.273862	0	1	1	0.0600649	0.273925	0.219275	0.826436	NA	0	0.273796	0	1	1	-0.28248	0.274185	-1.03026	0.30289	NA	-0.334438	0.237033	-1.41093	0.158264	1	0.0529814
Anks6	ENSRNOG00000023309	ankyrin repeat and sterile alpha motif domain containing 6 [Source:RGD Symbol;Acc:3334]	301.903	-0.244689	0.463152	-0.528314	0.597282	0.803147	-0.541744	0.46362	-1.16851	0.242602	0.433503	-0.545749	0.463271	-1.17803	0.238784	0.467488	-0.240684	0.46374	-0.519007	0.603756	0.818708	-0.605834	0.463307	-1.30763	0.190999	0.343815	0.0548297	0.463027	0.118416	0.905738	0.955754	-0.380381	0.463178	-0.821242	0.411508	0.592808	0.218007	0.462779	0.471082	0.637582	0.789469	-0.0810879	0.464069	-0.174733	0.86129	1	-0.118304
Ankzf1	ENSRNOG00000019052	ankyrin repeat and zinc finger domain containing 1 [Source:RGD Symbol;Acc:1359242]	956.705	0.211667	0.3382	0.625864	0.531404	0.757877	0.285286	0.337757	0.844648	0.398307	0.599847	0.529576	0.337892	1.56729	0.117046	0.296185	-0.0326228	0.337448	-0.0966751	0.922984	0.984244	0.337176	0.337412	0.999299	0.31765	0.492089	0.120798	0.337713	0.357695	0.720572	0.847991	0.0938337	0.337324	0.278171	0.780881	0.880813	-0.31489	0.33768	-0.932512	0.351072	0.552769	-0.223578	0.338925	-0.659669	0.509466	1	-0.0687704
Ano1	ENSRNOG00000020865	anoctamin 1, calcium activated chloride channel [Source:RGD Symbol;Acc:1310786]	42.278	-0.86337	0.505981	-1.70633	0.0879466	0.260868	-0.216858	0.505624	-0.428891	0.668003	0.815316	-0.573817	0.506145	-1.1337	0.25692	0.489202	-0.506411	0.505791	-1.00123	0.316718	0.576347	0.358558	0.505612	0.709157	0.478227	0.648773	-0.30866	0.505982	-0.610022	0.541847	0.728919	-0.0434936	0.506102	-0.0859384	0.931515	0.970316	1.01552	0.5062	2.00617	0.044838	0.124588	0.449378	0.50488	0.890069	0.373429	1	0.858118
Ano4	ENSRNOG00000006841	anoctamin 4 [Source:RGD Symbol;Acc:1310252]	919.773	0.371343	0.33004	1.12514	0.260528	0.516309	0.181678	0.329607	0.551195	0.5815	0.754441	-0.302929	0.330486	-0.916615	0.359344	0.599257	0.855949	0.330054	2.59336	0.00950426	0.0532349	0.77434	0.329636	2.34908	0.0188201	0.0550231	0.486766	0.329718	1.47631	0.139861	0.299122	0.0457272	0.330478	0.138367	0.889951	0.947642	0.189436	0.32993	0.57417	0.565853	0.736406	0.0738511	0.331635	0.222688	0.823779	1	0.105662
Ano6	ENSRNOG00000006995	anoctamin 6 [Source:RGD Symbol;Acc:1304765]	293.839	-0.405536	0.445754	-0.909775	0.362941	0.619449	-0.412698	0.446395	-0.924512	0.35522	0.558513	-0.073583	0.445403	-0.165206	0.868782	0.951813	-0.744651	0.446045	-1.66945	0.0950276	0.270839	-0.0474523	0.446239	-0.106338	0.915314	0.955181	-0.202233	0.445541	-0.453904	0.649898	0.802134	0.62639	0.445662	1.40552	0.159865	0.304124	0.314563	0.445182	0.706594	0.479819	0.670863	0.110613	0.447204	0.247343	0.804643	1	0.563892
Ano7	ENSRNOG00000023427	anoctamin 7 [Source:RGD Symbol;Acc:1302987]	0.184772	0	0.145825	0	1	NA	0	0.146422	0	1	NA	0	0.146693	0	1	NA	0	0.14729	0	1	NA	0	0.150061	0	1	NA	0	0.149483	0	1	NA	0	0.149126	0	1	NA	-0.258577	0.151845	-1.7029	0.0885865	NA	-0.150383	0.163848	-0.917815	0.358716	1	0
Anp32a	ENSRNOG00000014846	acidic (leucine-rich) nuclear phosphoprotein 32 family, member A [Source:RGD Symbol;Acc:2116]	1744.71	-0.343808	0.22522	-1.52654	0.126876	0.333876	0.996772	0.224786	4.43432	9.23626e-06	8.21589e-05	0.313964	0.224635	1.39766	0.162215	0.365211	0.339001	0.224199	1.51205	0.13052	0.332607	1.48796	0.22473	6.6211	3.56532e-11	4.44435e-10	0.601699	0.225552	2.66767	0.00763782	0.0290767	1.15027	0.225063	5.1109	3.2062e-07	2.63908e-06	0.957198	0.225104	4.25224	2.11644e-05	0.000158496	0.0116729	0.227817	0.0512381	0.959136	1	-0.110361
Anp32b	ENSRNOG00000009266	acidic (leucine-rich) nuclear phosphoprotein 32 family, member B [Source:RGD Symbol;Acc:621285]	5900.96	-0.457082	0.183206	-2.4949	0.0125991	0.0611798	0.708975	0.183136	3.87131	0.000108252	0.000768279	-0.183463	0.183093	-1.00202	0.316332	0.554453	0.435356	0.183022	2.37871	0.0173734	0.0826517	1.56526	0.183248	8.54176	1.32196e-17	2.59556e-16	0.747042	0.183397	4.07336	4.63405e-05	0.000328727	1.2516	0.18347	6.82185	8.98743e-12	1.19538e-10	1.31989	0.183249	7.20272	5.90226e-13	1.05503e-11	0.115759	0.183515	0.630789	0.528178	1	0.109235
Anp32e	ENSRNOG00000021168	acidic (leucine-rich) nuclear phosphoprotein 32 family, member E [Source:RGD Symbol;Acc:1310611]	2871.25	-0.402652	0.196961	-2.04432	0.0409217	0.149858	1.24603	0.196471	6.34205	2.26724e-10	3.99116e-09	0.480471	0.196263	2.4481	0.0143614	0.0659752	0.362903	0.195771	1.85371	0.0637801	0.208167	0.886698	0.195818	4.52817	5.9497e-06	3.95499e-05	-0.225304	0.19672	-1.1453	0.252084	0.45204	0.233113	0.195908	1.18992	0.23408	0.40133	0.266464	0.196329	1.35723	0.174707	0.343861	0.089052	0.197581	0.450711	0.652198	1	-0.133933
Anpep	ENSRNOG00000014610	alanyl (membrane) aminopeptidase [Source:RGD Symbol;Acc:2991]	34.2871	-0.455841	0.394468	-1.15558	0.247852	NA	0.137104	0.394283	0.347731	0.728042	0.851313	-0.369054	0.394662	-0.935114	0.349729	0.590509	0.0503177	0.394477	0.127555	0.898501	0.973969	-0.700675	0.395183	-1.77304	0.0762219	0.171238	-0.12241	0.394621	-0.310197	0.756411	0.870238	-0.419899	0.39492	-1.06325	0.287669	0.463435	0.247911	0.395168	0.627357	0.530425	0.709755	-0.0842719	0.393311	-0.214263	0.830342	1	-0.707687
Antxr1	ENSRNOG00000008678	anthrax toxin receptor 1 [Source:RGD Symbol;Acc:1307144]	142.872	0.499739	0.505385	0.988827	0.322748	0.582437	-0.0438547	0.505264	-0.0867956	0.930834	0.970523	0.404052	0.50538	0.7995	0.424	0.656313	0.0518322	0.505259	0.102585	0.918292	0.982485	-0.0815936	0.505167	-0.161518	0.871685	0.928413	0.0250326	0.505183	0.0495516	0.96048	0.982692	-0.763424	0.505119	-1.51137	0.130693	0.260415	-0.536002	0.505265	-1.06083	0.288765	0.488267	-0.0607612	0.50524	-0.120262	0.904275	1	-0.0622229
Anxa1	ENSRNOG00000017469	annexin A1 [Source:RGD Symbol;Acc:2118]	269.4	0.563241	0.503083	1.11958	0.262893	0.518499	-0.304613	0.503024	-0.605563	0.544805	0.727082	0.243291	0.503112	0.483572	0.62869	0.813131	0.0153378	0.503053	0.0304894	0.975677	1	-0.383079	0.502955	-0.761656	0.446265	0.61894	0.177409	0.502948	0.352739	0.724284	0.849802	-0.56629	0.502956	-1.12592	0.260197	0.432905	-0.393672	0.50302	-0.782618	0.433851	0.631764	-0.0078127	0.502857	-0.0155366	0.987604	1	-0.255027
Anxa10	ENSRNOG00000014339	annexin A10 [Source:RGD Symbol;Acc:1560956]	0.402677	0	0.158507	0	1	NA	0	0.15887	0	1	NA	0	0.159036	0	1	NA	0	0.159398	0	1	NA	-0.0436032	0.161179	-0.270527	0.786755	NA	-0.257477	0.161468	-1.5946	0.110802	NA	0	0.160491	0	1	NA	0	0.161264	0	1	NA	0.22779	0.165281	1.37819	0.168143	1	0.188123
Anxa11	ENSRNOG00000010984	annexin A11 [Source:RGD Symbol;Acc:1309911]	6015.5	-0.0162096	0.163006	-0.0994418	0.920787	0.965522	1.03399	0.16244	6.36537	1.94823e-10	3.45865e-09	0.758259	0.162501	4.66617	3.06868e-06	5.50685e-05	0.259519	0.161934	1.60262	0.109018	0.296525	-0.410769	0.161618	-2.5416	0.0110347	0.0350368	-0.835787	0.162352	-5.14799	2.63298e-07	2.81099e-06	-0.696505	0.16174	-4.30633	1.65983e-05	0.000103948	-0.962403	0.162246	-5.93175	2.99716e-09	3.78568e-08	-0.142802	0.161986	-0.881572	0.378008	1	-0.608869
Anxa13	ENSRNOG00000007980	annexin A13 [Source:RGD Symbol;Acc:1307545]	0.0538214	0	0.137628	0	1	NA	0	0.137628	0	1	NA	0	0.137628	0	1	NA	0	0.137628	0	1	NA	-0.12669	0.137628	-0.920523	0.357299	NA	0	0.137628	0	1	NA	0	0.137628	0	1	NA	0	0.137628	0	1	NA	0	0.163848	0	1	1	-0.0395361
Anxa2	ENSRNOG00000010362	annexin A2 [Source:RGD Symbol;Acc:621170]	920.44	0.342044	0.406928	0.840551	0.4006	0.65852	-0.184749	0.406793	-0.45416	0.649714	0.803369	0.366485	0.40686	0.900764	0.367714	0.606973	-0.20919	0.406724	-0.514329	0.607022	0.8211	-0.744802	0.406409	-1.83264	0.0668562	0.154637	-0.234519	0.406444	-0.577002	0.563938	0.74529	-0.428023	0.406371	-1.05328	0.292213	0.468985	-0.397651	0.406627	-0.977927	0.32811	0.529668	0.178719	0.406555	0.439593	0.660232	1	-0.325206
Anxa3	ENSRNOG00000002045	annexin A3 [Source:RGD Symbol;Acc:2119]	4138.23	0.131064	0.207732	0.630928	0.528087	0.755437	-0.229637	0.207739	-1.10541	0.268982	0.464848	-0.14017	0.207798	-0.67455	0.499961	0.719407	0.0415976	0.207805	0.200176	0.841343	0.949247	-0.408645	0.2075	-1.96937	0.0489102	0.120327	-0.0824369	0.207462	-0.397358	0.691103	0.829763	-0.51973	0.207538	-2.50426	0.0122708	0.03796	0.0464154	0.207538	0.223648	0.823031	0.907701	0.259855	0.207652	1.2514	0.21079	1	-0.0965486
Anxa4	ENSRNOG00000018159	annexin A4 [Source:RGD Symbol;Acc:621171]	1468.99	0.247362	0.269119	0.919155	0.358015	0.615959	1.19739	0.267784	4.47148	7.76786e-06	7.00892e-05	0.105719	0.269145	0.392796	0.69447	0.853922	1.33903	0.26781	4.99995	5.73463e-07	1.56144e-05	0.0268603	0.266555	0.100768	0.919734	0.957383	-0.00144782	0.268243	-0.00539741	0.995694	0.998502	-1.4429	0.267645	-5.39111	7.0024e-08	6.22882e-07	-0.414176	0.268304	-1.54368	0.122665	0.267463	-0.16512	0.269427	-0.612855	0.539972	1	-1.16743
Anxa5	ENSRNOG00000014453	annexin A5 [Source:RGD Symbol;Acc:2120]	3549.93	-0.557951	0.218706	-2.55115	0.0107368	0.0541092	0.454722	0.218716	2.07905	0.0376128	0.11142	0.353233	0.21814	1.61929	0.105384	0.275551	-0.456462	0.21815	-2.09242	0.0364012	0.13966	-0.712587	0.217945	-3.26958	0.00107709	0.00458397	-0.467044	0.2185	-2.1375	0.0325577	0.0966841	-0.344531	0.217755	-1.5822	0.113605	0.234351	-0.0619953	0.21803	-0.284343	0.776148	0.880367	-0.152851	0.218379	-0.699932	0.483969	1	-0.70003
Anxa6	ENSRNOG00000010668	annexin A6 [Source:RGD Symbol;Acc:621172]	2845.21	0.270668	0.228884	1.18256	0.236985	0.488776	-0.426221	0.228932	-1.86178	0.0626341	0.163575	0.140797	0.228889	0.615132	0.538468	0.748011	-0.29635	0.228937	-1.29446	0.195507	0.430738	-0.777593	0.228567	-3.40204	0.000668847	0.00301018	0.0858064	0.228507	0.375508	0.707283	0.840274	-0.64664	0.228378	-2.83145	0.00463375	0.0163433	-0.199315	0.228593	-0.871922	0.383251	0.58466	-0.014446	0.229104	-0.0630542	0.949723	1	-0.436945
Anxa7	ENSRNOG00000007136	annexin A7 [Source:RGD Symbol;Acc:621173]	2647.01	0.149088	0.194337	0.767162	0.442985	0.696076	-0.0918641	0.194244	-0.472931	0.636263	0.794827	0.103008	0.194291	0.530176	0.59599	0.789773	-0.0457843	0.194198	-0.235761	0.813618	0.93535	0.0661753	0.194024	0.341067	0.733053	0.845203	0.431161	0.194161	2.22064	0.0263752	0.0821068	0.326165	0.194201	1.67952	0.0930506	0.200065	0.131729	0.194086	0.678714	0.497319	0.68444	-0.150221	0.195672	-0.767714	0.442657	1	-0.272902
Anxa8	ENSRNOG00000060949	annexin A8 [Source:RGD Symbol;Acc:1307719]	29.1711	0.79122	0.427784	1.84958	0.0643744	NA	-0.841008	0.427828	-1.96576	0.0493262	0.137134	-0.122849	0.426939	-0.287743	0.773544	0.899002	0.0730608	0.426983	0.171109	0.864138	0.957189	-0.499898	0.427984	-1.16803	0.242795	0.40958	0.487235	0.428668	1.13663	0.255695	NA	-0.517767	0.427736	-1.21048	0.226094	0.392138	-0.277851	0.427951	-0.649258	0.516171	0.698179	0.025647	0.425826	0.0602288	0.951973	1	-0.143588
Aoah	ENSRNOG00000054964	acyloxyacyl hydrolase (neutrophil) [Source:RGD Symbol;Acc:1560514]	6.41468	-0.0252304	0.223299	-0.112989	0.910039	NA	0.21123	0.223492	0.945136	0.34459	NA	-0.0253749	0.223393	-0.113589	0.909564	NA	0.211375	0.223586	0.945387	0.344462	NA	0.211805	0.223864	0.946135	0.34408	NA	-0.193204	0.22375	-0.86348	0.387873	NA	-0.185989	0.223736	-0.83129	0.40581	NA	0.0210141	0.223772	0.0939085	0.925182	NA	0.144553	0.198177	0.729415	0.465748	1	0.148132
Aoc1	ENSRNOG00000008575	amine oxidase, copper containing 1 [Source:RGD Symbol;Acc:61296]	1.11533	0	0.166969	0	1	NA	0	0.167138	0	1	NA	0	0.167215	0	1	NA	0	0.167384	0	1	NA	0	0.168126	0	1	NA	0	0.167958	0	1	NA	-0.333996	0.16839	-1.98347	0.0473153	NA	0	0.168223	0	1	NA	0	0.169011	0	1	1	0
Aoc2-ps1	NA	NA	70.2151	0.241164	0.478476	0.504024	0.614244	0.813342	0.884156	0.476232	1.85657	0.0633729	0.165144	0.623194	0.477482	1.30517	0.191837	0.408677	0.502126	0.47522	1.05662	0.290686	0.547196	0.847553	0.475079	1.78402	0.0744198	0.168328	-0.0132328	0.476789	-0.027754	0.977858	0.992149	0.147231	0.475752	0.30947	0.756964	0.865723	-0.0178262	0.477462	-0.0373353	0.970218	0.984894	0.229996	0.481502	0.477663	0.63289	1	-0.0227319
Aoc3	ENSRNOG00000051307	amine oxidase, copper containing 3 [Source:RGD Symbol;Acc:62058]	33.9691	-0.0388414	0.380388	-0.10211	0.918669	NA	-0.25807	0.38025	-0.678685	0.497338	0.68958	-0.401834	0.380223	-1.05684	0.290586	0.527799	0.104923	0.380084	0.276051	0.782509	0.920729	-0.249343	0.380533	-0.655247	0.512309	0.67846	-0.0592281	0.380676	-0.155587	0.876359	0.940055	-0.303404	0.380366	-0.797664	0.425066	0.605468	0.254984	0.380664	0.669841	0.502959	0.688653	0.272923	0.379388	0.719376	0.471909	1	0.0674165
Aox1	ENSRNOG00000015354	aldehyde oxidase 1 [Source:RGD Symbol;Acc:620528]	73.6629	0.436806	0.466671	0.936003	0.349272	0.607507	-0.698163	0.466573	-1.49636	0.134559	0.286316	-0.39476	0.466312	-0.846556	0.397243	0.632258	0.133403	0.466214	0.286141	0.77477	0.917518	0.0146935	0.466505	0.031497	0.974873	0.987813	0.298297	0.46696	0.638806	0.522949	0.71346	-0.749803	0.466605	-1.60693	0.108069	0.22556	-0.307464	0.466866	-0.65857	0.510172	0.694019	-0.167616	0.465687	-0.359933	0.718897	1	0.410225
Aox2	ENSRNOG00000033923	aldehyde oxidase 2 [Source:RGD Symbol;Acc:1359668]	1.66108	0.0820712	0.169663	0.483729	0.628578	NA	-0.0344591	0.169824	-0.202911	0.839204	NA	0	0.16971	0	1	NA	0.0477392	0.16987	0.281033	0.778685	NA	-0.122738	0.170468	-0.72001	0.471519	NA	0.0497708	0.170293	0.292265	0.770084	NA	0	0.170119	0	1	NA	-0.00926048	0.170329	-0.0543682	0.956642	NA	0.0230104	0.170755	0.134757	0.892804	1	-0.13789
Aox3	ENSRNOG00000014555	aldehyde oxidase 3 [Source:RGD Symbol;Acc:1359328]	29.0545	0.140679	0.492964	0.285375	0.775357	NA	0.958676	0.4941	1.94025	0.0523498	0.143227	0.363427	0.493363	0.736632	0.461346	0.689711	0.735928	0.494497	1.48824	0.136689	0.342103	1.2449	0.494413	2.51794	0.0118045	0.0370695	0.154091	0.493609	0.312173	0.754909	NA	0.194763	0.493987	0.394267	0.693384	0.820169	-0.350522	0.493866	-0.709751	0.477858	0.669392	-0.353142	0.491624	-0.718317	0.472562	1	0.127355
Aox4	NA	NA	19.3226	0	0.331298	0	1	NA	0.466761	0.331808	1.40672	0.159511	0.323545	0.784648	0.332062	2.36295	0.01813	0.078632	-0.317801	0.332572	-0.955584	0.339283	0.599191	0.265304	0.332473	0.797972	0.424886	0.599894	-0.0104626	0.331824	-0.0315305	0.974846	NA	0.65676	0.332522	1.97509	0.0482582	0.118979	0	0.331953	0	1	NA	0.00870208	0.298351	0.0291673	0.976731	1	-0.138488
Ap1ar	ENSRNOG00000024492	adaptor-related protein complex 1 associated regulatory protein [Source:RGD Symbol;Acc:1311435]	5941.71	0.0830208	0.214344	0.387326	0.698515	0.861714	-0.14795	0.214337	-0.69027	0.490024	0.683069	0.115985	0.21429	0.541254	0.588333	0.784373	-0.180915	0.214283	-0.844279	0.398513	0.656423	-0.8716	0.214024	-4.07245	4.65218e-05	0.000266947	-0.655668	0.214013	-3.06368	0.00218635	0.0100716	-0.716233	0.213977	-3.34724	0.000816206	0.00356707	-0.794083	0.214005	-3.71058	0.000206784	0.00126342	-0.0554023	0.213247	-0.259804	0.795015	1	-0.067991
Ap1b1	ENSRNOG00000008786	adaptor-related protein complex 1, beta 1 subunit [Source:RGD Symbol;Acc:2064]	3496.57	0.486071	0.212061	2.29213	0.0218981	0.0932503	-0.342557	0.211932	-1.61635	0.106018	0.241316	0.621952	0.211956	2.93435	0.00334252	0.021101	-0.478438	0.211827	-2.25862	0.0239068	0.10401	-0.308169	0.211738	-1.45542	0.145552	0.282423	0.138103	0.211646	0.652521	0.514065	0.705995	0.311334	0.211627	1.47115	0.141251	0.277143	-0.386788	0.21183	-1.82594	0.06786	0.171463	-0.0388057	0.212103	-0.182957	0.854832	1	-0.103676
Ap1g1	NA	NA	714.366	0.0705545	0.327154	0.215661	0.829252	0.925997	-0.763184	0.327834	-2.32796	0.0199142	0.0673579	-0.235015	0.327326	-0.717986	0.472766	0.697686	-0.457614	0.328005	-1.39514	0.162973	0.3841	-0.233086	0.327817	-0.711027	0.477068	0.647517	0.525799	0.327063	1.60764	0.107914	0.246669	0.0803975	0.327288	0.245647	0.805955	0.897185	0.402416	0.326943	1.23084	0.218381	0.400993	-0.0526629	0.329916	-0.159625	0.873177	1	0.00428231
Ap1m1	ENSRNOG00000014454	adaptor-related protein complex 1, mu 1 subunit [Source:RGD Symbol;Acc:1307653]	3839.97	0.60342	0.151488	3.98328	6.7971e-05	0.000784887	-0.746851	0.151545	-4.92825	8.29687e-07	8.98995e-06	-0.0456014	0.151878	-0.300251	0.763986	0.893176	-0.0978291	0.151934	-0.643893	0.519645	0.758145	-0.9059	0.151202	-5.99131	2.08155e-09	2.22279e-08	-0.029733	0.150746	-0.197239	0.84364	0.922194	-0.645895	0.151239	-4.27068	1.94877e-05	0.000121018	-0.724211	0.151092	-4.79317	1.64168e-06	1.49506e-05	-0.0910063	0.152061	-0.598484	0.549517	1	-0.129243
Ap1m2	ENSRNOG00000043093	adaptor-related protein complex 1, mu 2 subunit [Source:RGD Symbol;Acc:1561490]	33.424	-0.130531	0.345122	-0.378218	0.705268	NA	0.0262758	0.345112	0.0761369	0.93931	0.975235	-0.415258	0.345035	-1.20353	0.228773	0.454287	0.311003	0.345025	0.901392	0.36738	0.6262	0.0992833	0.345316	0.287514	0.773719	0.872137	-0.0319844	0.345301	-0.0926277	0.926199	0.967161	-0.00724624	0.345012	-0.0210029	0.983243	0.995817	0.192089	0.345393	0.556147	0.578111	0.747016	0.0892561	0.338488	0.26369	0.792018	1	0.100148
Ap1s1	ENSRNOG00000001415	adaptor-related protein complex 1, sigma 1 subunit [Source:RGD Symbol;Acc:1305911]	13159.6	-0.195997	0.135071	-1.45107	0.14676	0.367542	-0.346501	0.135173	-2.56339	0.0103656	0.0395645	-0.599398	0.13514	-4.4354	9.19009e-06	0.000143848	0.0569001	0.135242	0.420729	0.673953	0.863234	-0.186896	0.135098	-1.38341	0.166538	0.310846	-0.215254	0.13498	-1.5947	0.110779	0.251795	-0.212689	0.135145	-1.57378	0.115538	0.237171	0.0830761	0.134929	0.615702	0.538091	0.715311	0.102345	0.1343	0.762061	0.446023	1	0.374906
Ap1s2	ENSRNOG00000038686	adaptor-related protein complex 1, sigma 2 subunit [Source:RGD Symbol;Acc:1561862]	3763.81	-0.0952763	0.285679	-0.333509	0.73875	0.881794	-1.82563	0.286396	-6.3745	1.83555e-10	3.26785e-09	-1.62824	0.286182	-5.68954	1.27385e-08	3.86741e-07	-0.292666	0.286898	-1.02011	0.307679	0.566707	-0.514497	0.286606	-1.79514	0.0726318	0.165074	-0.167073	0.285579	-0.585032	0.558526	0.741479	-0.542083	0.286365	-1.89298	0.0583606	0.138422	-0.0762786	0.285537	-0.267141	0.78936	0.887975	-0.00448334	0.284793	-0.0157424	0.98744	1	1.47871
Ap1s3	ENSRNOG00000049873	adaptor-related protein complex 1, sigma 3 subunit [Source:RGD Symbol;Acc:1311772]	144.023	-0.316566	0.498539	-0.634986	0.525437	0.754712	-0.263128	0.498357	-0.527991	0.597506	0.766019	0.715382	0.498846	1.43407	0.151551	0.350607	-1.29507	0.498664	-2.59709	0.00940176	0.0528491	-1.63877	0.498767	-3.28564	0.00101752	0.00435911	-0.90117	0.49878	-1.80675	0.0708013	0.180063	-0.139539	0.499094	-0.279585	0.779796	0.8803	-0.633892	0.498923	-1.27052	0.203899	0.382096	-0.0490618	0.498463	-0.0984261	0.921594	1	-0.472595
Ap2a1	ENSRNOG00000026243	adaptor-related protein complex 2, alpha 1 subunit [Source:RGD Symbol;Acc:1306254]	3777.83	0.481893	0.177851	2.70953	0.00673788	0.0374475	-0.492014	0.177807	-2.76712	0.00565539	0.0237496	0.329372	0.177866	1.8518	0.0640546	0.197913	-0.339493	0.177822	-1.90917	0.0562396	0.19043	-0.131666	0.177727	-0.740831	0.458796	0.631332	0.541285	0.177589	3.04797	0.00230395	0.0105307	0.250652	0.177632	1.41107	0.158223	0.301822	-0.080629	0.177716	-0.453697	0.650047	0.797777	-0.139954	0.178601	-0.783612	0.433268	1	-0.180849
Ap2a2	ENSRNOG00000019534	adaptor-related protein complex 2, alpha 2 subunit [Source:RGD Symbol;Acc:71015]	4908.42	0.506817	0.173165	2.92679	0.00342485	0.0221212	-0.527174	0.173127	-3.04502	0.00232669	0.0112477	0.125619	0.173293	0.724895	0.468516	0.695021	-0.145976	0.173255	-0.842552	0.399479	0.65755	-0.601554	0.1729	-3.47921	0.000502898	0.00233691	-0.229758	0.172629	-1.33094	0.18321	0.364356	-0.586528	0.17282	-3.39387	0.000689124	0.00306064	-0.895024	0.172814	-5.17911	2.22952e-07	2.28118e-06	-0.158407	0.172909	-0.91613	0.359599	1	0.155336
Ap2b1	ENSRNOG00000061543	adaptor-related protein complex 2, beta 1 subunit [Source:RGD Symbol;Acc:71048]	7135.02	0.100192	0.194581	0.514911	0.606615	0.809208	-0.113559	0.194562	-0.583665	0.559446	0.738468	0.270947	0.194511	1.39296	0.163632	0.367134	-0.284314	0.194492	-1.46182	0.143789	0.353856	-0.17432	0.19443	-0.896568	0.36995	0.546047	0.207609	0.194473	1.06755	0.285724	0.492109	0.0865754	0.194385	0.445381	0.656045	0.791954	0.0154892	0.194447	0.0796574	0.93651	0.968706	-0.0919407	0.193886	-0.474201	0.635357	1	-0.268408
Ap2m1	ENSRNOG00000001709	adaptor-related protein complex 2, mu 1 subunit [Source:RGD Symbol;Acc:620135]	60526.1	0.572442	0.0681692	8.39737	4.56575e-17	4.61893e-15	-0.839021	0.0681924	-12.3037	8.64867e-35	8.62739e-33	0.437784	0.0681704	6.42191	1.34579e-10	5.9983e-09	-0.704362	0.0681936	-10.3289	5.21729e-25	2.98073e-22	-0.58926	0.0681705	-8.64392	5.43146e-18	1.0926e-16	0.497696	0.0681083	7.30742	2.72325e-13	6.02865e-12	0.174403	0.0681106	2.56059	0.0104494	0.0330746	-0.103615	0.0681493	-1.52041	0.128407	0.276372	-0.0288731	0.0668978	-0.4316	0.666032	1	-0.247973
Ap2s1	ENSRNOG00000015865	adaptor-related protein complex 2, sigma 1 subunit [Source:RGD Symbol;Acc:620188]	17159.4	-0.442413	0.0831166	-5.32279	1.02186e-07	2.37914e-06	0.467283	0.0830951	5.62347	1.87162e-08	2.60513e-07	-0.167912	0.0830176	-2.02261	0.0431137	0.149298	0.192782	0.082996	2.32279	0.0201907	0.0922825	0.920569	0.0830683	11.0821	1.53297e-28	5.19057e-27	0.52166	0.083213	6.26897	3.63445e-10	5.73158e-09	0.878483	0.0832005	10.5586	4.63432e-26	1.60024e-24	1.10004	0.0830942	13.2384	5.26263e-40	4.21432e-38	0.135964	0.0832258	1.63367	0.102327	1	-0.068373
Ap3b1	ENSRNOG00000010624	adaptor-related protein complex 3, beta 1 subunit [Source:RGD Symbol;Acc:1310256]	645.462	-0.184449	0.399617	-0.461566	0.644393	0.828637	-0.197469	0.399785	-0.493939	0.621349	0.783796	-0.576624	0.399792	-1.44231	0.149215	0.347447	0.194705	0.39996	0.486811	0.626392	0.834086	0.443802	0.39984	1.10995	0.267021	0.438881	0.199583	0.399533	0.499541	0.617398	0.780176	0.00284065	0.399913	0.00710318	0.994333	1	0.593516	0.399445	1.48585	0.137318	0.289431	0.208943	0.400751	0.521377	0.602104	1	0.440512
Ap3d1	ENSRNOG00000018977	adaptor-related protein complex 3, delta 1 subunit [Source:RGD Symbol;Acc:1308659]	12331.3	0.687308	0.110676	6.21007	5.29623e-10	1.96338e-08	-0.695447	0.110657	-6.2847	3.28487e-10	5.687e-09	0.580056	0.110674	5.24112	1.59606e-07	3.79941e-06	-0.588195	0.110655	-5.31559	1.06315e-07	3.50728e-06	0.996807	0.110948	8.98442	2.60097e-19	5.66818e-18	1.74935	0.110835	15.7833	4.0519e-56	1.18852e-53	1.67133	0.110927	15.0669	2.67439e-51	2.48995e-49	1.01873	0.110907	9.18546	4.09775e-20	1.26535e-18	-0.043308	0.111075	-0.389899	0.696611	1	-0.0570942
Ap3m1	ENSRNOG00000011461	adaptor-related protein complex 3, mu 1 subunit [Source:RGD Symbol;Acc:620417]	1580.16	1.44878	0.234748	6.17164	6.75848e-10	2.44222e-08	-0.333198	0.233122	-1.42929	0.152922	0.313809	1.40785	0.234691	5.99876	1.98832e-09	7.01999e-08	-0.292268	0.233064	-1.25403	0.209832	0.450224	0.201904	0.233111	0.86613	0.386419	0.563001	0.26763	0.232724	1.14999	0.25015	0.450137	0.376411	0.232907	1.61614	0.106064	0.222372	-1.37091	0.234354	-5.84976	4.92271e-09	6.04e-08	-0.189486	0.234901	-0.806663	0.419861	1	0.267082
Ap3m2	ENSRNOG00000018650	adaptor-related protein complex 3, mu 2 subunit [Source:RGD Symbol;Acc:70969]	1924.66	0.656557	0.192361	3.41315	0.000642176	0.00561108	-1.07942	0.192909	-5.59549	2.19998e-08	3.03197e-07	0.165829	0.192751	0.860327	0.389609	0.625654	-0.588693	0.193298	-3.04552	0.00232277	0.0178615	-1.10825	0.192468	-5.75807	8.50787e-09	8.48096e-08	-0.116508	0.191109	-0.609642	0.542099	0.729075	-0.63953	0.191605	-3.33774	0.000844614	0.00367334	-0.969785	0.191668	-5.0597	4.1991e-07	4.13778e-06	-0.19647	0.193401	-1.01587	0.309692	1	0.0875696
Ap3s1	ENSRNOG00000003829	adaptor-related protein complex 3, sigma 1 subunit [Source:RGD Symbol;Acc:1311115]	3340.16	-0.152102	0.177554	-0.856649	0.391639	0.649519	0.203472	0.177461	1.14657	0.25156	0.444346	-0.378518	0.177645	-2.13076	0.0331087	0.123047	0.429888	0.177552	2.4212	0.0154692	0.0757728	-0.448224	0.17679	-2.53535	0.0112336	0.0355948	-0.515452	0.177058	-2.91121	0.00360034	0.015434	-0.813757	0.177201	-4.59228	4.38427e-06	3.03949e-05	-0.425927	0.176844	-2.40849	0.0160187	0.0549604	-0.0625391	0.17783	-0.351679	0.725079	1	-0.136163
Ap3s2	ENSRNOG00000043141	adaptor-related protein complex 3, sigma 2 subunit [Source:RGD Symbol;Acc:1586888]	5061.2	-0.211562	0.158421	-1.33545	0.181731	0.416678	0.179725	0.1584	1.13463	0.256531	0.449636	0.0195957	0.158271	0.123811	0.901465	0.968396	-0.0514326	0.15825	-0.325008	0.745175	0.901932	0.335709	0.158235	2.12159	0.0338722	0.0894548	0.276734	0.158392	1.74715	0.0806119	0.197886	0.534982	0.158339	3.37872	0.000728248	0.00322188	0.540563	0.15825	3.41589	0.000635746	0.00342294	0.0522501	0.159053	0.328507	0.742529	1	-0.120713
Ap4b1	ENSRNOG00000019455	adaptor-related protein complex 4, beta 1 subunit [Source:RGD Symbol;Acc:1310529]	1101.83	0.280566	0.32174	0.872027	0.383194	0.640614	-1.00318	0.322215	-3.11339	0.00184954	0.0092595	-0.416769	0.322091	-1.29395	0.195683	0.413021	-0.305846	0.322566	-0.948165	0.343045	0.602871	-0.0607037	0.322439	-0.188264	0.85067	0.916192	0.975608	0.321823	3.0315	0.0024334	0.0110577	0.0629788	0.322166	0.195485	0.845013	0.921799	0.263625	0.32165	0.819604	0.412442	0.612516	-0.430673	0.323388	-1.33175	0.182941	1	-0.0330715
Ap4e1	ENSRNOG00000022938	adaptor-related protein complex 4, epsilon 1 subunit [Source:RGD Symbol;Acc:1562199]	54.1558	-0.566463	0.468587	-1.20888	0.226711	0.475733	0.606477	0.468647	1.2941	0.19563	0.37403	-0.503265	0.46872	-1.0737	0.282956	0.519346	0.54328	0.46878	1.15892	0.246488	0.497768	0.554496	0.469027	1.18223	0.237116	0.402125	0.460084	0.468304	0.982448	0.325879	0.537316	0.374865	0.468398	0.800312	0.42353	0.603902	0.423696	0.469096	0.903217	0.366411	0.567766	-0.593179	0.467008	-1.27017	0.204025	1	-0.503505
Ap4m1	ENSRNOG00000001353	adaptor-related protein complex 4, mu 1 subunit [Source:RGD Symbol;Acc:1310233]	198.662	0.2094	0.488403	0.428744	0.668109	0.844164	0.225167	0.488513	0.460923	0.644854	0.800037	-0.334925	0.488293	-0.685909	0.492771	0.714101	0.769492	0.488403	1.57552	0.115135	0.307378	-0.392474	0.488691	-0.803111	0.42191	0.597362	-0.50261	0.488617	-1.02864	0.30365	0.510931	-1.12779	0.488494	-2.3087	0.02096	0.0598741	-0.84163	0.4886	-1.72253	0.0849729	0.203569	-0.12961	0.488504	-0.26532	0.790763	1	-0.115021
Ap4s1	ENSRNOG00000005765	adaptor-related protein complex 4, sigma 1 subunit [Source:RGD Symbol;Acc:1311990]	1594.88	-0.503818	0.283237	-1.77879	0.0752748	0.23232	0.273176	0.28332	0.964193	0.334949	0.537261	-0.379613	0.283063	-1.34109	0.179891	0.391237	0.148971	0.283146	0.526126	0.598801	0.815518	-0.0809624	0.2828	-0.286288	0.774657	0.872794	-0.0385697	0.283187	-0.136199	0.891664	0.948065	-0.0573305	0.283044	-0.20255	0.839487	0.918006	0.469375	0.282774	1.6599	0.0969353	0.225176	0.00412231	0.284105	0.0145098	0.988423	1	-0.315214
Ap5b1	ENSRNOG00000026114	adaptor-related protein complex 5, beta 1 subunit [Source:RGD Symbol;Acc:1562657]	757.526	0.750664	0.258032	2.90919	0.00362371	0.0231251	-0.187148	0.257092	-0.72794	0.46665	0.662749	0.382288	0.258327	1.47986	0.138911	0.331303	0.181228	0.257388	0.704106	0.481367	0.72563	0.68532	0.257488	2.66156	0.00777788	0.0260556	1.22583	0.257883	4.75342	2.00001e-06	1.84773e-05	0.684013	0.258229	2.64887	0.00807618	0.0265106	0.311882	0.258429	1.20684	0.227494	0.414268	-0.162702	0.26349	-0.617487	0.536913	1	-0.352115
Ap5m1	ENSRNOG00000014148	adaptor-related protein complex 5, mu 1 subunit [Source:RGD Symbol;Acc:1308087]	203.397	0.325072	0.500895	0.648981	0.51635	0.749467	-0.949799	0.501057	-1.89559	0.0580144	0.155112	-0.378341	0.50104	-0.755111	0.450182	0.679926	-0.246386	0.501202	-0.49159	0.623009	0.831892	-0.709956	0.501	-1.41708	0.156461	0.296975	0.565166	0.500823	1.12847	0.25912	0.460924	-0.975158	0.500865	-1.94695	0.0515408	0.125303	-0.0174028	0.500819	-0.0347487	0.97228	0.985886	-0.25588	0.501021	-0.510717	0.609549	1	-0.32332
Ap5s1	ENSRNOG00000021249	adaptor-related protein complex 5, sigma 1 subunit [Source:RGD Symbol;Acc:1561852]	236.756	-0.171976	0.427388	-0.402389	0.687398	0.856071	-0.164518	0.427716	-0.384644	0.700501	0.83686	-0.631672	0.427903	-1.4762	0.139889	0.332816	0.295177	0.428229	0.689297	0.490636	0.734231	-0.279093	0.426992	-0.653625	0.513353	0.679404	-0.0741924	0.426918	-0.173786	0.862033	0.932522	-0.165118	0.428036	-0.385758	0.699676	0.824156	0.065596	0.426517	0.153795	0.877772	0.937977	-0.0319247	0.43	-0.0742433	0.940817	1	-0.0400525
Ap5z1	ENSRNOG00000001107	adaptor-related protein complex 5, zeta 1 subunit [Source:RGD Symbol;Acc:1593125]	1111.28	0.764379	0.317618	2.4066	0.0161018	0.0737196	-0.949827	0.317706	-2.98964	0.00279302	0.0131629	0.781403	0.317553	2.4607	0.0138665	0.0641742	-0.966851	0.317641	-3.04385	0.00233569	0.0179227	0.146948	0.318035	0.46205	0.644046	0.779437	0.990268	0.31737	3.12023	0.00180712	0.00852892	0.862538	0.317344	2.71799	0.00656798	0.022144	0.334279	0.317821	1.05178	0.292899	0.492553	0.108194	0.319308	0.338838	0.734732	1	0.106313
Apaf1	ENSRNOG00000008022	apoptotic peptidase activating factor 1 [Source:RGD Symbol;Acc:620575]	544.842	0.202167	0.461274	0.438279	0.661184	0.8407	-0.331041	0.46129	-0.717642	0.472978	0.667512	-0.0419615	0.461313	-0.090961	0.927524	0.980393	-0.0869129	0.461329	-0.188397	0.850566	0.952379	-0.0458466	0.461216	-0.0994038	0.920818	0.958078	0.498329	0.461191	1.08053	0.279908	0.48532	-0.0416158	0.461204	-0.0902329	0.928102	0.968613	0.388966	0.461231	0.843321	0.399049	0.600222	0.0926167	0.461468	0.2007	0.840933	1	-0.212731
Apba1	ENSRNOG00000014928	amyloid beta (A4) precursor protein-binding, family A, member 1 [Source:RGD Symbol;Acc:620844]	537.619	0.0188533	0.362303	0.0520374	0.958499	0.98111	-0.38248	0.362651	-1.05468	0.291573	0.490013	0.443957	0.361789	1.22712	0.219779	0.443901	-0.807583	0.362137	-2.23005	0.0257443	0.109318	-0.289403	0.362208	-0.798996	0.424293	0.599526	0.0278518	0.361786	0.0769841	0.938636	0.973017	0.442205	0.361429	1.22349	0.221145	0.386251	0.129237	0.361755	0.35725	0.720905	0.846538	0.119754	0.364373	0.328657	0.742415	1	0.0649648
Apba2	ENSRNOG00000016358	amyloid beta (A4) precursor protein-binding, family A, member 2 [Source:RGD Symbol;Acc:620845]	4444.88	0.381733	0.154397	2.47242	0.0134203	0.0645111	0.027857	0.154117	0.180752	0.856562	0.93036	0.574271	0.154249	3.723	0.000196867	0.00204667	-0.164681	0.153969	-1.06957	0.284813	0.540103	0.0514825	0.153885	0.334551	0.737964	0.848327	0.543677	0.154163	3.52664	0.000420872	0.00241471	0.357623	0.153931	2.32327	0.0201645	0.0579177	0.0539977	0.154254	0.350057	0.726296	0.849816	-0.107901	0.155239	-0.695066	0.487014	1	-0.519832
Apba3	ENSRNOG00000020466	amyloid beta (A4) precursor protein-binding, family A, member 3 [Source:RGD Symbol;Acc:620846]	607.023	-0.169749	0.39023	-0.434996	0.663565	0.841517	-0.461092	0.390747	-1.18003	0.237989	0.427816	-0.270531	0.390213	-0.69329	0.488127	0.710512	-0.36031	0.390729	-0.922146	0.356452	0.61531	-0.454883	0.390344	-1.16534	0.243882	0.410984	-0.377997	0.389765	-0.969807	0.332143	0.543744	-0.635498	0.389769	-1.63045	0.103007	0.217194	-0.250118	0.389519	-0.642119	0.520796	0.702189	-0.0417496	0.390937	-0.106794	0.914953	1	0.383052
Apbb1	ENSRNOG00000018020	amyloid beta (A4) precursor protein-binding, family B, member 1 (Fe65) [Source:RGD Symbol;Acc:2122]	19454.2	0.174751	0.0597955	2.92247	0.00347263	0.0223477	-0.235693	0.059787	-3.9422	8.07362e-05	0.000590327	0.320258	0.0597091	5.36363	8.15646e-08	2.10079e-06	-0.381199	0.0597006	-6.38519	1.71185e-10	1.1506e-08	-0.248479	0.0596211	-4.16764	3.07767e-05	0.000182478	0.176046	0.0596124	2.95317	0.00314525	0.013734	0.138262	0.059531	2.32252	0.0202051	0.0580209	-0.0644451	0.0596143	-1.08103	0.279682	0.478601	-0.0657361	0.0598739	-1.09791	0.272244	1	-0.188822
Apbb1ip	ENSRNOG00000017803	amyloid beta (A4) precursor protein-binding, family B, member 1 interacting protein [Source:RGD Symbol;Acc:1304795]	532.929	0.826304	0.422232	1.95699	0.0503486	0.17398	-0.421911	0.421944	-0.999924	0.317347	0.518558	0.767132	0.422208	1.81695	0.0692244	0.208981	-0.362739	0.421919	-0.859735	0.389935	0.647393	1.61506	0.42298	3.81829	0.000134381	0.000704941	1.61585	0.422404	3.82536	0.000130583	0.000844611	1.53496	0.422537	3.63272	0.000280454	0.00137107	0.422785	0.422478	1.00073	0.316959	0.519202	-0.365479	0.423961	-0.862058	0.388655	1	0.419454
Apbb3	ENSRNOG00000017849	amyloid beta (A4) precursor protein-binding, family B, member 3 [Source:RGD Symbol;Acc:620853]	1374.11	1.07636	0.243663	4.41741	9.98898e-06	0.000142771	-0.768668	0.243052	-3.16256	0.00156387	0.00803939	1.1013	0.243544	4.52198	6.12635e-06	0.00010199	-0.793608	0.242933	-3.26678	0.00108777	0.00973805	-0.762297	0.24266	-3.14142	0.00168129	0.00679091	0.28109	0.242088	1.16111	0.245597	0.445034	-0.00481634	0.241894	-0.0199109	0.984114	0.996069	-0.878792	0.243273	-3.61236	0.00030342	0.00177443	-0.0833785	0.24457	-0.340919	0.733164	1	-0.274251
Apc	ENSRNOG00000020423	adenomatous polyposis coli [Source:RGD Symbol;Acc:2123]	6554.54	0.588807	0.134223	4.38678	1.15043e-05	0.000162028	-0.176912	0.13405	-1.31975	0.186918	0.362539	0.523372	0.134208	3.89971	9.63089e-05	0.00113343	-0.111477	0.134035	-0.831706	0.405575	0.663673	1.54	0.134552	11.4454	2.47903e-30	8.88331e-29	1.74538	0.134528	12.9741	1.71605e-38	2.09733e-36	1.33441	0.134428	9.92657	3.19034e-23	9.54749e-22	1.02362	0.134559	7.60726	2.79963e-14	5.56774e-13	-0.132915	0.135598	-0.980216	0.32698	1	-0.0284546
Apc2	ENSRNOG00000033791	adenomatosis polyposis coli 2 [Source:RGD Symbol;Acc:1308256]	4068.94	0.827865	0.218865	3.78253	0.00015524	0.00162252	-1.06201	0.218921	-4.85112	1.22768e-06	1.28269e-05	0.511738	0.218907	2.33769	0.0194034	0.0830657	-0.745885	0.218963	-3.40644	0.000658169	0.00649334	0.805954	0.219354	3.67422	0.000238577	0.00119008	1.77951	0.219023	8.12477	4.48213e-16	1.32178e-14	1.5777	0.219228	7.19662	6.17227e-13	9.20276e-12	1.01684	0.2192	4.63889	3.50286e-06	3.00885e-05	0.0651862	0.219585	0.296861	0.766573	1	0.0884406
Apeh	ENSRNOG00000029572	acylaminoacyl-peptide hydrolase [Source:RGD Symbol;Acc:2125]	1101.75	0.227802	0.324345	0.702345	0.482464	0.726805	-0.342037	0.324365	-1.05448	0.291662	0.490013	0.295643	0.324249	0.911777	0.361886	0.601659	-0.409878	0.324269	-1.26401	0.206228	0.445144	0.572151	0.32459	1.76269	0.0779535	0.174395	0.913016	0.324427	2.81425	0.00488917	0.0199183	0.856633	0.324385	2.64079	0.00827136	0.0270686	0.718581	0.324467	2.21465	0.026784	0.0828986	0.0333082	0.326152	0.102125	0.918658	1	0.00117206
Apex1	ENSRNOG00000009663	APEX nuclease (multifunctional DNA repair enzyme) 1 [Source:RGD Symbol;Acc:2126]	3710.95	-0.254324	0.167573	-1.5177	0.129091	0.337963	-0.598641	0.168198	-3.55914	0.000372076	0.00231745	-0.86368	0.168007	-5.14074	2.73655e-07	6.2424e-06	0.0107147	0.168631	0.0635396	0.949337	0.993846	-1.13589	0.167628	-6.77627	1.23318e-11	1.60731e-10	-0.74946	0.16711	-4.48483	7.29727e-06	6.11563e-05	-0.986735	0.167755	-5.88199	4.05352e-09	4.1254e-08	-0.391291	0.166906	-2.34439	0.0190584	0.0635638	0.103791	0.167852	0.618345	0.536348	1	0.212094
Apex2	ENSRNOG00000000166	APEX nuclease (apurinic/apyrimidinic endonuclease) 2 [Source:RGD Symbol;Acc:1565983]	279.953	0.297548	0.470426	0.632507	0.527055	0.754795	-0.156855	0.470295	-0.333524	0.738739	0.85863	0.0948916	0.470471	0.201695	0.840155	0.938742	0.0458018	0.470339	0.0973803	0.922424	0.984123	0.228183	0.470212	0.485276	0.62748	0.767989	0.447432	0.470199	0.95158	0.34131	0.553503	0.0598232	0.470252	0.127215	0.89877	0.952901	-0.469522	0.470068	-0.99884	0.317872	0.519848	-0.61605	0.471121	-1.30762	0.191001	1	-0.0620116
Aph1a	ENSRNOG00000023816	APH1A gamma secretase subunit [Source:RGD Symbol;Acc:1311546]	2609.22	0.260098	0.245629	1.05891	0.289643	0.550122	0.198762	0.245345	0.810133	0.417864	0.619135	0.225374	0.245584	0.917706	0.358773	0.59886	0.233486	0.245301	0.951834	0.341181	0.600956	0.0110002	0.245037	0.044892	0.964193	0.983069	-0.0100536	0.245232	-0.0409962	0.967299	0.986983	-0.0168432	0.245276	-0.0686704	0.945252	0.977126	-0.273782	0.245316	-1.11603	0.264407	0.460006	-0.00362797	0.245717	-0.0147649	0.98822	1	-0.177611
Aph1b	NA	NA	2.21106	-0.0581194	0.204473	-0.284241	0.776226	NA	-0.0411489	0.204447	-0.201269	0.840488	NA	-0.131599	0.204547	-0.643368	0.519985	NA	0.0323308	0.204522	0.15808	0.874394	NA	-0.0639667	0.205218	-0.311701	0.755268	NA	0.0491189	0.205072	0.23952	0.810702	NA	-0.130209	0.205033	-0.635064	0.525387	NA	0.109838	0.205365	0.534844	0.592758	NA	0.00226492	0.194099	0.0116689	0.99069	1	-0.0634393
Api5	ENSRNOG00000009689	apoptosis inhibitor 5 [Source:RGD Symbol;Acc:1309772]	3666.2	-0.101605	0.138497	-0.733625	0.463177	0.711601	0.317665	0.138268	2.29745	0.0215932	0.0718265	-0.402661	0.138675	-2.90363	0.00368863	0.0227378	0.61872	0.138446	4.46902	7.85771e-06	0.000154318	-0.0404976	0.137643	-0.294222	0.768589	0.868683	-0.310833	0.137991	-2.25256	0.024287	0.0769536	-0.703638	0.138227	-5.09046	3.5719e-07	2.91752e-06	-0.260675	0.137784	-1.89191	0.0585026	0.153685	-0.0514147	0.139464	-0.368658	0.712383	1	-0.0472997
Apip	ENSRNOG00000007446	APAF1 interacting protein [Source:RGD Symbol;Acc:1564562]	616.214	0.393352	0.346371	1.13564	0.256108	0.511466	-0.00682397	0.345892	-0.0197286	0.98426	0.997272	0.295602	0.34635	0.853478	0.393394	0.62908	0.090926	0.345871	0.26289	0.792635	0.924092	0.532859	0.345882	1.54058	0.123419	0.248762	0.302901	0.345744	0.876086	0.380983	0.594348	0.344067	0.346017	0.994363	0.320046	0.499585	0.267564	0.346301	0.772633	0.43974	0.636557	0.356719	0.348746	1.02286	0.306373	1	0.235936
Apitd1	NA	NA	2160.64	-0.531255	0.196508	-2.70347	0.00686188	0.0379724	1.04753	0.19615	5.34045	9.2714e-08	1.17709e-06	0.070388	0.195898	0.35931	0.719363	0.869643	0.445886	0.195538	2.2803	0.0225898	0.0998017	1.21259	0.195786	6.19346	5.88593e-10	6.63098e-09	0.0151291	0.196498	0.0769936	0.938629	0.973017	0.742641	0.196155	3.78599	0.000153098	0.000792541	0.649449	0.195967	3.31407	0.00091948	0.00475659	0.102953	0.198337	0.519082	0.603704	1	0.149776
Aplf	ENSRNOG00000043059	aprataxin and PNKP like factor [Source:RGD Symbol;Acc:1565557]	177.444	-0.295331	0.494959	-0.596677	0.550723	0.77112	0.39598	0.494992	0.799974	0.423726	0.623887	0.128601	0.495065	0.259765	0.795045	0.911137	-0.0279508	0.495098	-0.0564552	0.954979	0.996452	-0.107195	0.495166	-0.216483	0.828611	0.904278	-0.367303	0.495055	-0.741943	0.458122	0.663728	-0.343826	0.495183	-0.69434	0.487469	0.659952	-0.283725	0.495161	-0.572996	0.566648	0.737231	-0.211363	0.494781	-0.427185	0.669244	1	-0.135615
Apln	ENSRNOG00000003984	apelin [Source:RGD Symbol;Acc:620672]	959.778	-0.838894	0.332752	-2.52108	0.0116996	0.0578165	1.13737	0.332457	3.4211	0.000623688	0.00364441	-0.0897588	0.331709	-0.270595	0.786702	0.905998	0.388233	0.331412	1.17145	0.241418	0.491797	-0.125877	0.330801	-0.380522	0.703558	0.824271	-1.2581	0.332125	-3.78805	0.000151836	0.000969786	-0.410508	0.331229	-1.23935	0.215217	0.37833	-0.278172	0.331079	-0.8402	0.400797	0.601871	0.140764	0.332343	0.423549	0.671895	1	-0.00512975
Aplnr	ENSRNOG00000009227	apelin receptor [Source:RGD Symbol;Acc:621645]	51.9467	0.318679	0.506221	0.629526	0.529005	0.755863	-0.899601	0.506059	-1.77766	0.0754598	0.188747	-0.765468	0.505916	-1.51303	0.130271	0.317143	0.184546	0.505752	0.364895	0.71519	0.887386	-0.0563325	0.50599	-0.111331	0.911354	0.953051	0.811976	0.506238	1.60394	0.108727	0.248238	-1.00937	0.506044	-1.99463	0.0460829	0.114696	0.309065	0.506243	0.610508	0.541525	0.718049	-0.180184	0.505142	-0.3567	0.721316	1	0.0305387
Aplp1	ENSRNOG00000020851	amyloid beta (A4) precursor-like protein 1 [Source:RGD Symbol;Acc:69257]	104296	-0.0753986	0.0574774	-1.3118	0.189589	0.427587	0.0658295	0.0574724	1.14541	0.25204	0.444928	-0.293138	0.0574848	-5.0994	3.40739e-07	7.59353e-06	0.283569	0.0574799	4.93335	8.08294e-07	2.10777e-05	-0.0173037	0.0574347	-0.301277	0.763203	0.864645	-0.071969	0.0574455	-1.25282	0.210271	0.401221	-0.234309	0.0574662	-4.07733	4.55563e-05	0.000263626	-0.0672887	0.0574287	-1.17169	0.241321	0.431619	-0.0707288	0.0560152	-1.26267	0.206707	1	-0.0111657
Aplp2	ENSRNOG00000047179	amyloid beta (A4) precursor-like protein 2 [Source:RGD Symbol;Acc:2128]	19230.9	-0.0522597	0.086699	-0.602772	0.546661	0.767996	0.321695	0.0866258	3.71361	0.00020432	0.00135807	0.0911379	0.0866395	1.05192	0.292836	0.530289	0.178297	0.0865663	2.05966	0.0394308	0.147765	0.503987	0.0865457	5.82336	5.7677e-09	5.86359e-08	0.390344	0.0866725	4.50367	6.67897e-06	5.64585e-05	0.26171	0.0865984	3.02211	0.0025102	0.00959836	0.398947	0.0866144	4.60601	4.1046e-06	3.50174e-05	-0.043658	0.0863727	-0.50546	0.613236	1	-0.208059
Apmap	ENSRNOG00000006795	adipocyte plasma membrane associated protein [Source:RGD Symbol;Acc:1308874]	1654.8	-0.582716	0.191863	-3.03714	0.00238831	0.0165065	0.035438	0.192427	0.184164	0.853885	0.928652	-0.196686	0.191192	-1.02874	0.303603	0.54127	-0.350592	0.191758	-1.82831	0.0675035	0.216307	-0.595953	0.19116	-3.11756	0.00182354	0.0072841	-0.598974	0.191372	-3.1299	0.00174868	0.00828646	-0.0982492	0.190946	-0.514539	0.606875	0.754567	0.196028	0.190633	1.0283	0.303807	0.504523	0.211961	0.193734	1.09408	0.273918	1	-0.0323654
Apoa1	ENSRNOG00000045679	apolipoprotein A-I [Source:RGD Symbol;Acc:2130]	6.69168	-0.131607	0.204871	-0.642389	0.520621	NA	0.205945	0.204949	1.00486	0.314963	NA	-0.131698	0.204938	-0.642626	0.520467	NA	0.206037	0.205016	1.00498	0.314906	NA	0.140788	0.205241	0.685962	0.492737	NA	-0.097339	0.205102	-0.474588	0.635081	NA	-0.00466523	0.20505	-0.0227517	0.981848	NA	0.124496	0.205211	0.606675	0.544066	NA	0.0767664	0.190883	0.402164	0.687563	1	0.0275347
Apoa1bp	ENSRNOG00000019201	apolipoprotein A-I binding protein [Source:RGD Symbol;Acc:1304699]	5193.9	-0.265403	0.193711	-1.3701	0.170656	0.402899	-0.186799	0.193829	-0.963733	0.33518	0.537493	-0.48161	0.193744	-2.4858	0.0129261	0.0611244	0.029408	0.193862	0.151695	0.879427	0.964402	0.0314531	0.193727	0.162358	0.871024	0.928111	0.122466	0.193665	0.632358	0.527153	0.717028	0.0079589	0.193783	0.0410711	0.967239	0.988753	0.609629	0.193592	3.14903	0.00163811	0.00788194	0.221735	0.193701	1.14473	0.252322	1	0.0957754
Apoa2	ENSRNOG00000003500	apolipoprotein A-II [Source:RGD Symbol;Acc:2131]	3.92221	-0.283766	0.171757	-1.65214	0.0985056	NA	0	0.171647	0	1	NA	-0.283845	0.171829	-1.6519	0.0985543	NA	0	0.17172	0	1	NA	0	0.171934	0	1	NA	-0.0571595	0.171908	-0.3325	0.739512	NA	0	0.171865	0	1	NA	0.274413	0.172123	1.59428	0.110873	NA	0.0477417	0.17207	0.277455	0.781431	1	0.0573922
Apoa5	ENSRNOG00000018436	apolipoprotein A-V [Source:RGD Symbol;Acc:70903]	14.2564	0	0.299324	0	1	NA	0.00750781	0.299404	0.0250758	0.979994	0.995531	0.34568	0.299698	1.15343	0.248734	0.479841	-0.338115	0.299779	-1.12788	0.25937	0.51208	-0.112257	0.299909	-0.374302	0.708179	NA	-0.397928	0.299973	-1.32654	0.184659	NA	0.115157	0.300145	0.383672	0.701222	0.825249	-0.125198	0.299936	-0.417418	0.676373	NA	0.23575	0.280445	0.840627	0.400557	1	0.240279
Apob	ENSRNOG00000005542	apolipoprotein B [Source:RGD Symbol;Acc:2129]	3.96648	0	0.188682	0	1	NA	0	0.188745	0	1	NA	0	0.188773	0	1	NA	0	0.188836	0	1	NA	-0.114656	0.189169	-0.606106	0.544444	NA	-0.0588619	0.189076	-0.311313	0.755563	NA	-0.25576	0.189165	-1.35205	0.17636	NA	0	0.189142	0	1	NA	0.0477065	0.17214	0.277138	0.781674	1	-0.0453664
Apobec1	ENSRNOG00000015411	apolipoprotein B mRNA editing enzyme, catalytic polypeptide 1 [Source:RGD Symbol;Acc:2133]	52.2257	0.216361	0.396445	0.545752	0.585236	0.794487	0.0318696	0.396635	0.0803501	0.935959	0.973174	0.806472	0.396761	2.03264	0.0420889	0.146927	-0.558241	0.39695	-1.40633	0.159628	0.378992	-0.200859	0.396975	-0.505974	0.612875	0.756314	0.0101181	0.396827	0.0254975	0.979658	0.992945	0.393513	0.397144	0.990858	0.321755	0.501285	-0.239948	0.396778	-0.60474	0.545352	0.720894	-0.033484	0.396076	-0.0845393	0.932628	1	-0.241423
Apobec2	ENSRNOG00000012303	apolipoprotein B mRNA editing enzyme, catalytic polypeptide-like 2 [Source:RGD Symbol;Acc:1308727]	28.6781	-0.388819	0.399732	-0.972698	0.330703	NA	0.717418	0.400056	1.79329	0.0729258	0.183909	-0.410071	0.399847	-1.02557	0.305095	0.542549	0.73867	0.40017	1.84589	0.0649084	0.210375	0.333261	0.400881	0.831321	0.405792	0.581508	-0.314278	0.400105	-0.785489	0.432167	NA	-0.358453	0.400096	-0.895917	0.370297	0.552865	-0.051014	0.4007	-0.127312	0.898693	0.94927	-0.1185	0.392086	-0.302229	0.762478	1	-0.0658396
Apobec3b	ENSRNOG00000016852	apolipoprotein B mRNA editing enzyme, catalytic polypeptide-like 3B [Source:RGD Symbol;Acc:1307800]	23.7074	-0.0389242	0.345426	-0.112685	0.910281	NA	-0.326606	0.345216	-0.946093	0.344101	0.546611	-0.365568	0.34527	-1.05879	0.289696	0.526412	0	0.34506	0	1	1	-0.262548	0.345507	-0.759893	0.447318	0.620051	0.236356	0.3456	0.683899	0.494039	NA	-0.458948	0.345532	-1.32824	0.1841	0.337445	0.0970495	0.345808	0.280645	0.778982	0.882499	-0.154575	0.327402	-0.472127	0.636836	1	-0.14937
Apobec4	ENSRNOG00000028089	apolipoprotein B mRNA editing enzyme, catalytic polypeptide-like 4 (putative) [Source:RGD Symbol;Acc:1560256]	0.0538214	0	0.137628	0	1	NA	0	0.137628	0	1	NA	0	0.137628	0	1	NA	0	0.137628	0	1	NA	-0.12669	0.137628	-0.920523	0.357299	NA	0	0.137628	0	1	NA	0	0.137628	0	1	NA	0	0.137628	0	1	NA	0	0.163848	0	1	1	-0.0395361
Apobr	ENSRNOG00000017403	apolipoprotein B receptor [Source:RGD Symbol;Acc:1565169]	197.741	0.360269	0.433167	0.831709	0.405573	0.663457	-0.117506	0.432618	-0.271617	0.785917	0.888326	0.255868	0.433143	0.590725	0.554705	0.760315	-0.0131058	0.432594	-0.0302958	0.975831	1	0.055313	0.432118	0.128004	0.898145	0.945938	-0.142831	0.431737	-0.330829	0.740774	0.859916	-0.319477	0.431839	-0.739806	0.459418	0.636155	-0.217265	0.432432	-0.502426	0.615368	0.773444	0.283016	0.435508	0.649851	0.515789	1	0.312526
Apoc1	ENSRNOG00000018426	apolipoprotein C-I [Source:RGD Symbol;Acc:2134]	1394.66	-0.396671	0.281794	-1.40766	0.159232	0.386932	-0.313888	0.282101	-1.11268	0.265847	0.460759	-1.31386	0.282348	-4.65334	3.26595e-06	5.82265e-05	0.603305	0.282654	2.13443	0.0328077	0.130406	1.75454	0.283495	6.18897	6.05578e-10	6.80984e-09	0.614235	0.282001	2.17813	0.0293961	0.0891457	1.24724	0.284355	4.3862	1.15349e-05	7.47716e-05	1.50649	0.282016	5.34185	9.20009e-08	9.80581e-07	0.494878	0.284004	1.7425	0.0814205	1	1.45201
Apoc2	ENSRNOG00000018402	apolipoprotein C-II [Source:RGD Symbol;Acc:2135]	4.32113	-0.318696	0.211746	-1.50509	0.132301	NA	-0.0543559	0.21148	-0.257027	0.797158	NA	-0.373071	0.211813	-1.76132	0.0781844	NA	0	0.211547	0	1	NA	-0.00712339	0.211926	-0.0336127	0.973186	NA	0.0472595	0.211897	0.22303	0.823512	NA	-0.0672843	0.211856	-0.317595	0.750792	NA	0.332584	0.212346	1.56624	0.117293	NA	-0.0269154	0.194505	-0.138379	0.889941	1	-1.6523e-05
Apoc3	ENSRNOG00000047503	apolipoprotein C-III [Source:RGD Symbol;Acc:2136]	2.13951	0	0.170453	0	1	NA	0	0.170532	0	1	NA	0	0.170569	0	1	NA	0	0.170649	0	1	NA	-0.0533911	0.171034	-0.312167	0.754914	NA	-0.121654	0.170997	-0.711441	0.476811	NA	-0.0946437	0.170957	-0.553611	0.579845	NA	-0.0754509	0.171087	-0.44101	0.659206	NA	0.0461768	0.171427	0.269368	0.787646	1	0.0682959
Apoc4	ENSRNOG00000018405	apolipoprotein C-IV [Source:RGD Symbol;Acc:70959]	49.2607	0.04537	0.42821	0.105953	0.91562	0.962859	-0.517539	0.427967	-1.2093	0.226549	0.41376	-0.662771	0.427822	-1.54918	0.121339	0.303083	0.190603	0.427579	0.445772	0.655762	0.853239	-0.160547	0.428064	-0.375055	0.70762	0.827138	0.0603539	0.428457	0.140864	0.887978	0.945782	-0.41293	0.427878	-0.965063	0.334513	0.515067	0.247797	0.428415	0.578404	0.562992	0.734592	0.230618	0.426904	0.540211	0.589052	1	0.293745
Apod	ENSRNOG00000048273	apolipoprotein D [Source:RGD Symbol;Acc:2137]	15353.6	-0.24671	0.137313	-1.7967	0.0723838	0.226484	0.0206371	0.137347	0.150255	0.880563	0.944246	-0.618573	0.137388	-4.5024	6.71915e-06	0.000110108	0.392501	0.137422	2.85618	0.0042877	0.0289898	-0.893363	0.137097	-6.51631	7.20599e-11	8.83039e-10	-1.03998	0.137115	-7.58476	3.33114e-14	8.29815e-13	-1.18315	0.137234	-8.62139	6.61485e-18	1.42367e-16	-0.446063	0.137066	-3.25437	0.00113645	0.00573091	0.34728	0.136057	2.55245	0.0106969	0.736108	0.126008
Apoe	ENSRNOG00000018454	apolipoprotein E [Source:RGD Symbol;Acc:2138]	178397	-0.685396	0.0696885	-9.83514	7.94553e-23	1.62529e-20	0.555017	0.0696898	7.9641	1.66429e-15	4.71135e-14	-0.462886	0.069675	-6.6435	3.06323e-11	1.51503e-09	0.332506	0.0696763	4.77216	1.82265e-06	4.38028e-05	0.237299	0.069661	3.40648	0.000658057	0.00296379	-0.376377	0.0696823	-5.40132	6.61506e-08	7.677e-07	-0.0517743	0.0696765	-0.743068	0.457441	0.634346	0.369549	0.0696554	5.30539	1.1243e-07	1.18779e-06	0.0605455	0.0676654	0.894777	0.370906	1	0.058674
Apoh	ENSRNOG00000003566	apolipoprotein H (beta-2-glycoprotein I) [Source:RGD Symbol;Acc:1310625]	1.87163	0	0.169809	0	1	NA	0	0.169905	0	1	NA	0	0.16995	0	1	NA	0	0.170047	0	1	NA	0	0.170469	0	1	NA	0	0.170372	0	1	NA	-0.235529	0.17054	-1.38107	0.167256	NA	-0.108045	0.170601	-0.63332	0.526525	NA	-0.108509	0.17096	-0.634705	0.525621	1	0
Apol3	ENSRNOG00000042771	apolipoprotein L, 3 [Source:RGD Symbol;Acc:1306480]	124.404	-0.814273	0.507803	-1.60352	0.108819	0.300295	0.286773	0.507814	0.564722	0.572263	0.749091	-1.29669	0.507814	-2.55347	0.0106656	0.0527543	0.769187	0.507825	1.51467	0.129856	0.33139	-0.0110096	0.507791	-0.0216813	0.982702	0.992147	0.155997	0.507813	0.307194	0.758696	0.871271	-0.904426	0.507815	-1.78102	0.0749099	0.168826	0.982305	0.507786	1.93449	0.0530534	0.142163	0.0119027	0.507543	0.0234516	0.98129	1	-0.449551
Apol9a	ENSRNOG00000023410	apolipoprotein L 9a [Source:RGD Symbol;Acc:1562332]	88.6767	-0.239609	0.472969	-0.506606	0.612432	0.812307	0.621325	0.473171	1.31311	0.189146	0.365637	0.456688	0.473349	0.964803	0.334644	0.573964	-0.0749719	0.47355	-0.158319	0.874206	0.962078	-0.254974	0.473722	-0.538236	0.590414	0.741175	-0.193898	0.473189	-0.409769	0.681976	0.823636	-0.188281	0.473715	-0.397456	0.691031	0.818424	-0.305492	0.473487	-0.645197	0.5188	0.700677	-0.348525	0.472617	-0.737436	0.460857	1	-0.677878
Apold1	ENSRNOG00000007830	apolipoprotein L domain containing 1 [Source:RGD Symbol;Acc:1303123]	46.3473	0.764638	0.464682	1.64551	0.0998654	0.283562	-0.766247	0.464807	-1.64853	0.0992444	0.230148	0	0.463908	0	1	1	0	0.464033	0	1	1	-1.29176	0.46553	-2.77482	0.00552325	0.0193243	0.502109	0.465676	1.07824	0.280928	0.486489	-1.27587	0.46546	-2.74109	0.00612354	0.0208639	-1.26918	0.465476	-2.72662	0.00639859	0.0255989	-0.837881	0.443004	-1.89136	0.0585762	1	-0.856601
Apom	ENSRNOG00000000850	apolipoprotein M [Source:RGD Symbol;Acc:620773]	37.1351	-0.473964	0.463566	-1.02243	0.306577	NA	0.0976337	0.463343	0.210716	0.833109	0.916529	-0.381765	0.463757	-0.823199	0.410395	0.643015	0.00543409	0.463534	0.0117232	0.990646	1	0.448606	0.463522	0.96782	0.333134	0.508893	0.0922297	0.463562	0.198959	0.842295	0.921471	0.266717	0.463536	0.575395	0.565024	0.722262	0.731277	0.463962	1.57616	0.114989	0.255181	0.161943	0.461513	0.350896	0.725667	1	0.253591
Apoo	ENSRNOG00000046918	apolipoprotein O [Source:RGD Symbol;Acc:1565289]	3100.42	0.257006	0.198001	1.29801	0.194285	0.434082	-0.705966	0.198261	-3.56078	0.000369753	0.00230564	-0.227225	0.198221	-1.14632	0.251662	0.483291	-0.221734	0.198482	-1.11715	0.263929	0.515913	-0.635754	0.198044	-3.21017	0.00132659	0.00551219	-0.0615006	0.197587	-0.311258	0.755605	0.869935	-0.422463	0.197933	-2.13437	0.0328126	0.0871376	-0.137933	0.197732	-0.697576	0.485442	0.675134	0.180466	0.19858	0.908784	0.363464	1	0.131634
Apool	ENSRNOG00000004512	apolipoprotein O-like [Source:RGD Symbol;Acc:1549725]	390.924	0.662076	0.360423	1.83694	0.0662184	0.212177	-0.415963	0.359883	-1.15583	0.247751	0.439394	-0.244302	0.361651	-0.675518	0.499347	0.718934	0.490415	0.361114	1.35806	0.174445	0.400328	0.144982	0.359896	0.402845	0.687062	0.812223	0.264758	0.359133	0.737216	0.460991	0.66529	-0.528628	0.360703	-1.46555	0.142771	0.27908	-0.180404	0.360144	-0.500923	0.616425	0.773995	0.215664	0.363649	0.593057	0.553143	1	0.294468
Apopt1	ENSRNOG00000058920	apoptogenic 1, mitochondrial [Source:RGD Symbol;Acc:1304719]	15.1616	-0.298729	0.475827	-0.627809	0.530129	NA	0.464977	0.47634	0.976147	0.328992	0.530999	0.233775	0.477297	0.489788	0.624284	0.809498	-0.0675256	0.477808	-0.141324	0.887614	0.969028	0.235908	0.478023	0.493508	0.621654	NA	-0.275413	0.476832	-0.57759	0.563541	NA	0.339924	0.477813	0.711416	0.476826	0.650887	0.0222451	0.477866	0.0465509	0.962871	NA	-0.001031	0.473538	-0.00217722	0.998263	1	0.044426
App	ENSRNOG00000006997	amyloid beta (A4) precursor protein [Source:RGD Symbol;Acc:2139]	24889.6	-0.22223	0.0743652	-2.98836	0.0028048	0.0188661	0.0771604	0.0743837	1.03733	0.299583	0.499066	-0.395265	0.0743837	-5.31387	1.07324e-07	2.69253e-06	0.250195	0.0744022	3.36274	0.000771725	0.00736508	-1.01301	0.0740445	-13.681	1.3181e-42	7.20035e-41	-0.823854	0.0741324	-11.1133	1.08125e-28	7.46252e-27	-1.22291	0.074148	-16.4928	4.13574e-61	5.35898e-59	-0.674375	0.0740265	-9.10991	8.24466e-20	2.49458e-18	-0.0727539	0.0734843	-0.990061	0.322144	1	-0.266322
Appbp2	ENSRNOG00000027654	amyloid beta precursor protein (cytoplasmic tail) binding protein 2 [Source:RGD Symbol;Acc:1306488]	2397.92	0.495799	0.179497	2.76216	0.005742	0.033166	-0.722427	0.179647	-4.02138	5.78591e-05	0.000435728	0.353547	0.179512	1.96949	0.0488972	0.163281	-0.580175	0.179662	-3.22925	0.00124114	0.0108033	-0.578628	0.179393	-3.22547	0.00125765	0.00525775	0.295387	0.178909	1.65105	0.0987288	0.230892	0.238896	0.179112	1.33378	0.182277	0.335242	-0.0113572	0.17933	-0.0633312	0.949503	0.974323	0.188868	0.181203	1.0423	0.297273	1	-0.151437
Appl2	ENSRNOG00000008174	adaptor protein, phosphotyrosine interaction, PH domain and leucine zipper containing 2 [Source:RGD Symbol;Acc:1563028]	989.211	0.17403	0.294292	0.591354	0.554283	0.772705	0.389823	0.293708	1.32725	0.184426	0.359269	-0.862842	0.295575	-2.9192	0.0035093	0.0218467	1.4267	0.294994	4.83636	1.32241e-06	3.2591e-05	0.395317	0.293248	1.34806	0.177638	0.325997	-0.336488	0.293443	-1.14669	0.25151	0.45115	-1.24446	0.29493	-4.2195	2.44845e-05	0.000148885	0.0815262	0.293877	0.277416	0.781461	0.883614	0.590718	0.295791	1.99708	0.0458162	1	0.341225
Aprt	ENSRNOG00000014405	adenine phosphoribosyl transferase [Source:RGD Symbol;Acc:1307758]	4170.34	-0.392483	0.121131	-3.24015	0.00119467	0.00937321	0.303542	0.121135	2.50582	0.0122167	0.0453088	-0.336236	0.121001	-2.77878	0.00545642	0.0313159	0.247295	0.121005	2.04368	0.0409857	0.152006	0.770569	0.121072	6.36455	1.95858e-10	2.29266e-09	0.308296	0.121217	2.54334	0.0109799	0.0396512	0.531255	0.121358	4.37759	1.19999e-05	7.75057e-05	0.750001	0.12087	6.205	5.46964e-10	7.39048e-09	0.0491929	0.123225	0.399211	0.689738	1	0.158639
Aptr	NA	NA	84.6502	0.275495	0.498756	0.552365	0.580698	0.791704	0.37619	0.499	0.753888	0.450917	0.648315	-0.461676	0.498478	-0.926172	0.354357	0.594647	1.11336	0.498724	2.23242	0.025587	0.108887	0.0960477	0.499225	0.192394	0.847434	0.914407	-0.224318	0.499074	-0.449469	0.653094	0.804797	-1.07098	0.498778	-2.1472	0.0317774	0.0850532	-0.155573	0.498935	-0.31181	0.755185	0.867484	0.340758	0.498152	0.684044	0.493947	1	-0.0553418
Aptx	ENSRNOG00000006582	aprataxin [Source:RGD Symbol;Acc:628740]	358.708	0.220061	0.492426	0.446892	0.654953	0.837181	-0.925282	0.492644	-1.8782	0.0603543	0.159368	0.0455806	0.49244	0.0925607	0.926253	0.979807	-0.750801	0.492657	-1.52398	0.127513	0.327619	-1.22432	0.492485	-2.48601	0.0129185	0.0399952	-0.226669	0.49222	-0.460504	0.645154	0.799134	-0.271153	0.492287	-0.550803	0.581769	0.735935	-0.656714	0.492226	-1.33417	0.182148	0.353664	-0.209542	0.492118	-0.425797	0.670256	1	-0.0722132
Aqp1	ENSRNOG00000011648	aquaporin 1 [Source:RGD Symbol;Acc:2141]	176.878	-0.2274	0.500567	-0.454284	0.649625	0.832691	0.189346	0.500552	0.378274	0.705227	0.840189	0.719666	0.500248	1.43862	0.150259	0.348902	-0.757719	0.500233	-1.51473	0.12984	0.33139	-0.688267	0.500167	-1.37607	0.168799	0.314064	-0.606877	0.50032	-1.21298	0.225139	0.419202	0.412103	0.500057	0.824111	0.409877	0.591271	-0.0335625	0.500263	-0.0670897	0.94651	0.972979	0.343302	0.500473	0.685954	0.492742	1	-0.269005
Aqp11	ENSRNOG00000013358	aquaporin 11 [Source:RGD Symbol;Acc:628763]	656.96	0.149113	0.387055	0.385251	0.700051	0.862562	-0.590276	0.387485	-1.52335	0.12767	0.276147	-0.195364	0.38729	-0.504437	0.613954	0.802045	-0.245799	0.38772	-0.63396	0.526107	0.762744	-1.28924	0.386668	-3.33422	0.00085538	0.00373757	-0.791131	0.386059	-2.04925	0.0404375	0.115748	-1.24826	0.38633	-3.23108	0.00123323	0.00513261	-0.689373	0.386224	-1.7849	0.0742771	0.183697	0.250248	0.386959	0.646703	0.517824	1	0.0919454
Aqp12a	ENSRNOG00000004452	aquaporin 12A [Source:RGD Symbol;Acc:1562727]	0.940026	0.330217	0.166488	1.98343	0.0473194	NA	-0.330423	0.166686	-1.9823	0.0474453	NA	0	0.166029	0	1	NA	0	0.166227	0	1	NA	0	0.167105	0	1	NA	0.331439	0.167656	1.9769	0.0480529	NA	0	0.16682	0	1	NA	0	0.167222	0	1	NA	0	0.16819	0	1	1	0
Aqp2	ENSRNOG00000054378	aquaporin 2 (collecting duct) [Source:RGD Symbol;Acc:2142]	0.385912	0	0.158189	0	1	NA	0	0.158559	0	1	NA	0	0.158727	0	1	NA	0	0.159097	0	1	NA	-0.0826367	0.161041	-0.51314	0.607853	NA	0	0.160394	0	1	NA	-0.218544	0.160991	-1.35749	0.174624	NA	0	0.161	0	1	NA	0	0.164472	0	1	1	-0.0731739
Aqp3	ENSRNOG00000009797	aquaporin 3 [Source:RGD Symbol;Acc:68428]	10.325	0.09275	0.465343	0.199315	0.842016	NA	0.0252032	0.466003	0.0540838	0.956868	NA	0.262998	0.466229	0.564096	0.572689	NA	-0.145045	0.466888	-0.310662	0.756057	NA	0.0882864	0.467394	0.188891	0.850178	NA	-0.0998565	0.467415	-0.213636	0.830831	NA	0.209843	0.467488	0.448873	0.653523	NA	-0.175186	0.467454	-0.374766	0.707835	NA	0.0166066	0.462489	0.035907	0.971357	1	0.154811
Aqp4	ENSRNOG00000016043	aquaporin 4 [Source:RGD Symbol;Acc:2143]	6406.32	-0.0839044	0.095539	-0.878222	0.379823	0.636893	0.0498393	0.0955075	0.521837	0.601784	0.768623	-0.278316	0.0955928	-2.91147	0.00359731	0.0223172	0.244251	0.0955613	2.55596	0.0105896	0.0575754	0.261126	0.0952933	2.74024	0.00613948	0.0212087	-0.173324	0.0951942	-1.82074	0.0686468	0.175957	-0.260514	0.0953936	-2.73094	0.00631538	0.0214246	-0.1969	0.0950195	-2.07221	0.0382463	0.109908	-0.107442	0.0964965	-1.11343	0.265522	1	0.384469
Aqp5	ENSRNOG00000051970	aquaporin 5 [Source:RGD Symbol;Acc:2144]	4.37295	0.00768992	0.185915	0.0413625	0.967007	NA	-0.00775341	0.185968	-0.0416921	0.966744	NA	0.081305	0.186037	0.437038	0.662084	NA	-0.0813685	0.186089	-0.437255	0.661927	NA	-0.12037	0.186324	-0.646027	0.518262	NA	0.00805871	0.186222	0.0432747	0.965483	NA	0.081556	0.186245	0.437895	0.661462	NA	-0.206395	0.186377	-1.10741	0.268118	NA	-0.175421	0.172293	-1.01816	0.308602	1	-0.10157
Aqp8	ENSRNOG00000014652	aquaporin 8 [Source:RGD Symbol;Acc:2146]	0.0709999	-0.134483	0.137628	-0.977148	0.328496	NA	0	0.137628	0	1	NA	-0.136731	0.137628	-0.993477	0.320477	NA	0	0.137628	0	1	NA	0	0.137628	0	1	NA	0	0.137628	0	1	NA	0	0.137628	0	1	NA	0.148278	0.137628	1.07738	0.28131	NA	0	0.163848	0	1	1	0
Aqp9	ENSRNOG00000061883	aquaporin 9 [Source:RGD Symbol;Acc:68433]	150.42	0.362708	0.506408	0.716237	0.473845	0.719992	0.21625	0.506303	0.427115	0.669295	0.81618	0.422866	0.506381	0.835075	0.403676	0.637266	0.156092	0.506276	0.308314	0.757843	0.908087	-0.229164	0.506185	-0.452727	0.650745	0.784649	-0.416836	0.506231	-0.823409	0.410275	0.621772	-0.500175	0.506209	-0.98808	0.323113	0.502874	-0.741815	0.506282	-1.46522	0.14286	0.298182	0.0374682	0.506127	0.0740293	0.940987	1	-0.028389
Aqr	ENSRNOG00000008912	aquarius intron-binding spliceosomal factor [Source:RGD Symbol;Acc:1306223]	695.94	0.398451	0.456165	0.873481	0.382401	0.639569	-0.557068	0.456188	-1.22114	0.222035	0.407766	-0.0431464	0.456249	-0.0945676	0.924658	0.979522	-0.115471	0.456272	-0.253074	0.800211	0.92759	0.0509769	0.456202	0.111742	0.911028	0.953013	0.413327	0.456027	0.906365	0.364743	0.578392	0.162743	0.456205	0.356731	0.721293	0.839438	0.166143	0.456127	0.364248	0.715673	0.842945	0.151137	0.456011	0.331434	0.740317	1	0.194549
Ar	ENSRNOG00000005639	androgen receptor [Source:RGD Symbol;Acc:2147]	250.146	0.260181	0.500853	0.519476	0.603429	0.807414	-0.551317	0.500893	-1.10067	0.271042	0.46693	-0.156496	0.500903	-0.312427	0.754716	0.888836	-0.13464	0.500944	-0.268772	0.788105	0.922318	0.318665	0.500948	0.636124	0.524696	0.689147	0.214338	0.500763	0.428024	0.668634	0.815242	0.378604	0.500937	0.755791	0.449775	0.628065	-0.0401815	0.500785	-0.0802369	0.936049	0.968557	0.00563996	0.500804	0.0112618	0.991015	1	0.652644
Araf	ENSRNOG00000010838	A-Raf proto-oncogene, serine/threonine kinase [Source:RGD Symbol;Acc:2148]	13204	-0.488396	0.154965	-3.15166	0.00162346	0.012131	0.394725	0.154967	2.54716	0.0108603	0.041165	-0.582412	0.154959	-3.7585	0.000170934	0.00182693	0.488741	0.15496	3.15397	0.00161063	0.0133097	0.161246	0.154823	1.04148	0.297651	0.471522	-0.498963	0.154887	-3.22148	0.00127532	0.00634846	-0.327618	0.154942	-2.11445	0.0344766	0.0905803	0.0618045	0.154775	0.399317	0.689659	0.825283	0.0723893	0.153831	0.470577	0.637943	1	0.26555
Arap2	ENSRNOG00000056826	ArfGAP with RhoGAP domain, ankyrin repeat and PH domain 2 [Source:RGD Symbol;Acc:1306452]	1571.01	0.735323	0.289815	2.53722	0.0111738	0.0556746	-0.0596011	0.289287	-0.206028	0.836769	0.918707	1.15051	0.28957	3.97318	7.09188e-05	0.000866515	-0.474792	0.289041	-1.64264	0.100457	0.281211	0.330869	0.289204	1.14407	0.252595	0.420855	0.987215	0.289566	3.40929	0.000651325	0.00353796	0.531504	0.288934	1.83954	0.0658364	0.152562	0.181294	0.289919	0.625327	0.531756	0.710295	-0.070514	0.290954	-0.242354	0.808506	1	-0.596058
Arc	ENSRNOG00000043465	activity-regulated cytoskeleton-associated protein [Source:RGD Symbol;Acc:62037]	4935.34	-0.661012	0.198827	-3.32456	0.000885566	0.00737411	0.890329	0.198678	4.48127	7.42006e-06	6.74351e-05	1.69831	0.197816	8.58532	9.058e-18	9.81466e-16	-1.469	0.197666	-7.43169	1.07217e-13	1.29577e-11	-0.113575	0.197866	-0.574001	0.565967	0.721908	0.624175	0.199324	3.13147	0.00173936	0.00825231	0.373754	0.197286	1.89448	0.0581618	0.138114	0.0449602	0.198078	0.226983	0.820437	0.906132	-1.24006	0.198754	-6.23917	4.39899e-10	6.38733e-06	-1.62786
Arcn1	ENSRNOG00000061108	archain 1 [Source:RGD Symbol;Acc:1359110]	5292.35	0.320913	0.192065	1.67086	0.0947501	0.274289	-0.208185	0.191972	-1.08446	0.278163	0.475225	0.342897	0.192009	1.78584	0.0741249	0.219063	-0.230168	0.191915	-1.19932	0.230402	0.477254	-0.682803	0.191666	-3.56247	0.000367384	0.00176319	-0.384416	0.191634	-2.00599	0.0448571	0.125701	-0.328915	0.191632	-1.71639	0.0860906	0.188155	-0.748983	0.191732	-3.90641	9.36783e-05	0.000615235	-0.0436489	0.19145	-0.227991	0.819653	1	-0.0901932
Areg	ENSRNOG00000002754	amphiregulin [Source:RGD Symbol;Acc:2149]	11.9699	-0.447203	0.267346	-1.67275	0.0943766	NA	0.289315	0.267301	1.08236	0.279095	0.476428	-0.420113	0.26746	-1.57075	0.116241	0.294741	0.262224	0.267415	0.98059	0.326795	0.586713	0.270849	0.267684	1.01182	0.311622	NA	-0.0509867	0.267438	-0.190649	0.848801	NA	0.00493949	0.26742	0.0184709	0.985263	0.996441	0.370885	0.267854	1.38465	0.166159	NA	-0.0229942	0.257873	-0.0891686	0.928948	1	0.0294114
Arel1	ENSRNOG00000004382	apoptosis resistant E3 ubiquitin protein ligase 1 [Source:RGD Symbol;Acc:1307597]	4515.56	0.36487	0.192534	1.8951	0.0580798	0.19329	-0.153398	0.192423	-0.797195	0.425338	0.625139	0.372602	0.192494	1.93566	0.0529094	0.172412	-0.16113	0.192382	-0.837552	0.402282	0.660435	0.650528	0.192514	3.37911	0.000727208	0.00323044	0.597794	0.192411	3.10685	0.0018909	0.00888504	0.686637	0.192476	3.5674	0.000360539	0.00171782	0.445172	0.192558	2.31188	0.0207844	0.0678518	0.212196	0.192893	1.10007	0.271301	1	0.206081
Arf1	ENSRNOG00000060229	ADP-ribosylation factor 1 [Source:RGD Symbol;Acc:621270]	11423.1	0.165519	0.134092	1.23437	0.217065	0.462515	-1.23837	0.134628	-9.19843	3.63224e-20	1.47746e-18	-0.624489	0.134384	-4.64707	3.3669e-06	5.96877e-05	-0.448359	0.134918	-3.32319	0.000889955	0.00831044	-2.11338	0.134319	-15.7341	8.83431e-56	6.82909e-54	-0.834602	0.133731	-6.24089	4.35101e-10	6.79765e-09	-1.70122	0.134041	-12.6918	6.5644e-37	3.5873e-35	-1.07022	0.133756	-8.0013	1.23112e-15	2.71842e-14	-0.070102	0.133111	-0.526642	0.598442	1	-0.0404156
Arf2	ENSRNOG00000004807	ADP-ribosylation factor 2 [Source:RGD Symbol;Acc:621271]	1998.63	0.253625	0.26537	0.955739	0.339204	0.59769	-0.593453	0.265605	-2.23435	0.0254601	0.0819693	0.512306	0.265132	1.93227	0.0533268	0.17324	-0.852135	0.265367	-3.21115	0.00132203	0.0113579	-1.02166	0.265098	-3.85389	0.000116255	0.000618569	-0.649034	0.264601	-2.45288	0.0141718	0.0492236	0.030743	0.2646	0.116187	0.907505	0.95796	-0.92902	0.264727	-3.50935	0.000449199	0.00251904	-0.0263401	0.265084	-0.0993652	0.920848	1	0.22065
Arf3	ENSRNOG00000057515	ADP-ribosylation factor 3 [Source:MGI Symbol;Acc:MGI:99432]	65223.6	0.352929	0.0604923	5.83428	5.40246e-09	1.60324e-07	-0.465217	0.0604958	-7.69007	1.47054e-14	3.81884e-13	0.21678	0.0604938	3.58351	0.00033901	0.00324973	-0.329068	0.0604973	-5.43939	5.34635e-08	1.89826e-06	-0.216556	0.06047	-3.58122	0.000341996	0.00165426	0.165169	0.0604226	2.73357	0.00626521	0.0246346	0.066662	0.0604427	1.1029	0.270072	0.443963	-0.248338	0.0604435	-4.1086	3.9807e-05	0.000283439	-0.0605864	0.0592833	-1.02198	0.30679	1	0.0835016
Arf4	ENSRNOG00000012623	ADP-ribosylation factor 4 [Source:RGD Symbol;Acc:621275]	7987.61	0.111381	0.196478	0.566888	0.57079	0.785408	-0.122147	0.196457	-0.621746	0.534109	0.718144	0.0937693	0.19645	0.477318	0.633136	0.816067	-0.104535	0.19643	-0.532174	0.594605	0.812814	-0.47512	0.196273	-2.42071	0.0154902	0.046848	-0.566553	0.196235	-2.88711	0.003888	0.0164093	-0.402445	0.196263	-2.05054	0.0403113	0.102857	-0.525557	0.19626	-2.67786	0.00740934	0.0288777	0.152411	0.195356	0.78017	0.435291	1	0.213628
Arf5	ENSRNOG00000007806	ADP-ribosylation factor 5 [Source:RGD Symbol;Acc:621278]	28701.8	0.155482	0.0880022	1.7668	0.0772617	0.23683	0.275577	0.0879375	3.13378	0.00172571	0.00873559	0.447625	0.0879532	5.08935	3.59285e-07	7.94906e-06	-0.0165658	0.0878884	-0.188487	0.850495	0.952379	0.955716	0.0879562	10.8658	1.67709e-27	5.36799e-26	0.971578	0.0880441	11.0351	2.58664e-28	1.7442e-26	1.13431	0.0880085	12.8886	5.21632e-38	2.98018e-36	0.909158	0.0880524	10.3252	5.42061e-25	2.29269e-23	0.093074	0.0873047	1.06608	0.286386	1	-0.291476
Arf6	ENSRNOG00000004791	ADP-ribosylation factor 6 [Source:RGD Symbol;Acc:621279]	2059.81	-0.233573	0.251233	-0.92971	0.352521	0.610364	-0.202782	0.251504	-0.806278	0.420083	0.621032	-0.555043	0.251408	-2.20774	0.0272621	0.106415	0.118687	0.251679	0.471582	0.637225	0.841546	-0.96099	0.250805	-3.83162	0.000127302	0.000672688	-0.490902	0.250808	-1.95728	0.0503142	0.1378	-1.02217	0.25098	-4.0727	4.64707e-05	0.000268547	-0.360813	0.250524	-1.44023	0.149802	0.308172	-0.103396	0.251415	-0.411256	0.680885	1	-0.267077
Arfgap1	ENSRNOG00000043150	ADP-ribosylation factor GTPase activating protein 1 [Source:RGD Symbol;Acc:708452]	1076.68	0.20813	0.324216	0.641949	0.520906	0.752126	0.0405755	0.323966	0.125246	0.900329	0.95399	-0.120885	0.324382	-0.372662	0.7094	0.864311	0.36959	0.324133	1.14024	0.254184	0.506475	-0.148032	0.323536	-0.457544	0.64728	0.781658	-0.149331	0.323642	-0.461407	0.644507	0.798606	-0.31736	0.323994	-0.979523	0.327322	0.507696	-0.0767489	0.323848	-0.236991	0.812664	0.90238	0.280227	0.324959	0.862347	0.388497	1	-0.0392106
Arfgap2	ENSRNOG00000014429	ADP-ribosylation factor GTPase activating protein 2 [Source:RGD Symbol;Acc:1306177]	2466.95	0.344949	0.18397	1.87503	0.0607889	0.199238	-0.351567	0.183899	-1.91174	0.0559091	0.150766	0.238804	0.183959	1.29814	0.19424	0.411495	-0.245423	0.183888	-1.33463	0.181997	0.41151	-0.191476	0.183635	-1.0427	0.297089	0.471043	0.0980421	0.183374	0.534655	0.592888	0.764522	-0.0184447	0.183477	-0.100529	0.919925	0.965119	-0.442111	0.183481	-2.40958	0.0159711	0.0548127	-0.195021	0.185151	-1.05331	0.2922	1	0.0619893
Arfgap3	ENSRNOG00000046472	ADP-ribosylation factor GTPase activating protein 3 [Source:RGD Symbol;Acc:1560066]	1149.33	-0.691091	0.326189	-2.11868	0.0341173	0.130663	0.292888	0.326364	0.897427	0.369491	0.572996	-0.425782	0.325913	-1.30643	0.191407	0.408038	0.0275792	0.326088	0.0845759	0.932599	0.987517	0.35087	0.326025	1.07621	0.281835	0.455269	-0.0352374	0.326238	-0.108011	0.913987	0.959882	0.20496	0.326063	0.628591	0.529617	0.694497	0.389768	0.325585	1.19713	0.231255	0.419422	-0.265676	0.32707	-0.812291	0.416625	1	0.0930743
Arfgef1	ENSRNOG00000005703	ADP-ribosylation factor guanine nucleotide-exchange factor 1(brefeldin A-inhibited) [Source:RGD Symbol;Acc:1560793]	3259.27	0.00473662	0.187294	0.0252898	0.979824	0.992298	0.155679	0.187166	0.831769	0.405539	0.606596	0.771071	0.186909	4.12538	3.70127e-05	0.000491248	-0.610656	0.186781	-3.26937	0.00107787	0.00966636	0.787665	0.187215	4.20728	2.58464e-05	0.00015542	0.685652	0.187366	3.65943	0.000252772	0.00152875	1.20348	0.186953	6.43736	1.21571e-10	1.46926e-09	0.663234	0.187254	3.54189	0.000397269	0.00225413	-0.0176714	0.188654	-0.0936708	0.925371	1	-0.0536333
Arfgef2	ENSRNOG00000007485	ADP-ribosylation factor guanine nucleotide-exchange factor 2 (brefeldin A-inhibited) [Source:RGD Symbol;Acc:631430]	370.494	0.57158	0.45654	1.25198	0.210577	0.454866	-0.366231	0.456389	-0.802452	0.422291	0.62276	-0.098913	0.456804	-0.216533	0.828573	0.9331	0.304262	0.456654	0.666286	0.505229	0.746644	0.682247	0.456625	1.49411	0.135147	0.266457	1.23066	0.456599	2.69528	0.00703299	0.027127	0.21831	0.456781	0.477931	0.6327	0.772799	-0.117269	0.456438	-0.256922	0.797239	0.891546	-0.772906	0.457659	-1.68883	0.0912526	1	-0.181278
Arfip1	ENSRNOG00000010533	ADP-ribosylation factor interacting protein 1 [Source:RGD Symbol;Acc:708401]	292.438	0.237417	0.503859	0.471199	0.637499	0.823937	-0.380712	0.503871	-0.755575	0.449904	0.647425	0.0378939	0.503873	0.0752052	0.940051	0.986499	-0.181189	0.503886	-0.359583	0.719159	0.889183	-1.14659	0.503715	-2.27627	0.0228301	0.0645661	-0.835695	0.503654	-1.65927	0.0970624	0.22804	-1.15257	0.503674	-2.28833	0.0221182	0.062684	-1.19187	0.503677	-2.36633	0.0179653	0.0604987	-0.118515	0.503365	-0.235446	0.813862	1	0.0696697
Arfip2	ENSRNOG00000018440	ADP-ribosylation factor interacting protein 2 [Source:RGD Symbol;Acc:1303204]	3309.16	-0.235272	0.161077	-1.46062	0.14412	0.362753	0.22579	0.161017	1.40228	0.160832	0.325575	-0.167921	0.1609	-1.04364	0.296651	0.534874	0.15844	0.160839	0.985081	0.324584	0.584308	-0.444234	0.160185	-2.77326	0.00554984	0.0194118	-0.751004	0.160437	-4.68098	2.85512e-06	2.57092e-05	-0.465607	0.160455	-2.90178	0.00371045	0.0135061	-0.587673	0.160113	-3.67035	0.000242215	0.00145402	-0.0718933	0.161371	-0.445515	0.655948	1	0.0809225
Arfrp1	ENSRNOG00000013992	ADP-ribosylation factor related protein 1 [Source:RGD Symbol;Acc:621683]	2318.11	-0.0910365	0.243427	-0.373979	0.70842	0.866149	-0.156334	0.243509	-0.642007	0.520869	0.707237	-0.143654	0.243393	-0.590215	0.555047	0.760647	-0.103717	0.243475	-0.425984	0.670119	0.860903	0.278457	0.243452	1.14378	0.252713	0.420994	0.594725	0.243488	2.44252	0.014585	0.0503757	0.342909	0.243456	1.4085	0.158982	0.30281	0.639538	0.243337	2.6282	0.00858371	0.0326807	-0.0461888	0.244517	-0.188898	0.850173	1	-0.159815
Arg1	ENSRNOG00000013304	arginase 1 [Source:RGD Symbol;Acc:2150]	267.729	0.158532	0.432255	0.366755	0.713802	0.869851	-0.875881	0.43302	-2.02273	0.0431015	0.123573	-3.9741	0.448247	-8.86589	7.5898e-19	9.19909e-17	3.25675	0.448952	7.25413	4.04242e-13	4.45694e-11	0.0632394	0.433412	0.145911	0.883992	0.936086	0.156301	0.431802	0.361974	0.717372	0.845667	-3.58654	0.448274	-8.00078	1.23629e-15	2.27693e-14	-0.042154	0.431807	-0.0976222	0.922232	0.96074	-0.0396697	0.434737	-0.0912498	0.927294	1	0.777246
Arg2	ENSRNOG00000053811	arginase 2 [Source:RGD Symbol;Acc:2151]	821.293	-0.58362	0.330832	-1.7641	0.0777149	0.237964	0.55125	0.330796	1.66643	0.0956269	0.224415	-0.177932	0.330348	-0.538618	0.59015	0.78543	0.145561	0.330313	0.440677	0.659447	0.85564	0.546195	0.330291	1.65368	0.0981928	0.209166	0.0324364	0.330872	0.0980329	0.921906	0.965031	0.445419	0.330559	1.34748	0.177827	0.328886	0.606689	0.330213	1.83726	0.066171	0.16842	-0.00934332	0.332677	-0.0280853	0.977594	1	-0.037395
Arglu1	ENSRNOG00000024142	arginine and glutamate rich 1 [Source:RGD Symbol;Acc:1310061]	9703.35	-0.666355	0.102076	-6.52805	6.66315e-11	2.90214e-09	0.844373	0.10201	8.27733	1.25964e-16	3.84402e-15	-0.0791113	0.101828	-0.776911	0.437211	0.66796	0.257129	0.101762	2.52676	0.011512	0.06113	1.62209	0.102119	15.8843	8.14325e-57	6.49927e-55	0.610342	0.102329	5.96449	2.454e-09	3.49852e-08	1.38408	0.102283	13.5318	1.01453e-41	6.93026e-40	1.34309	0.102049	13.1612	1.46659e-39	1.12928e-37	0.0663874	0.102947	0.644872	0.51901	1	0.167353
Arhgap1	ENSRNOG00000016610	Rho GTPase activating protein 1 [Source:RGD Symbol;Acc:1306068]	1984.36	0.358282	0.251077	1.42698	0.153585	0.378813	-0.511841	0.251139	-2.03808	0.0415423	0.120227	-0.57203	0.251814	-2.27163	0.0231086	0.0939669	0.418472	0.251876	1.66142	0.0966295	0.273914	-1.00576	0.250632	-4.01289	5.99799e-05	0.000336935	-0.221899	0.250399	-0.886182	0.37552	0.588483	-1.2842	0.251167	-5.11292	3.17215e-07	2.61276e-06	-0.683197	0.250564	-2.72664	0.00639832	0.0255989	-0.102925	0.251237	-0.409674	0.682045	1	-0.271784
Arhgap10	ENSRNOG00000013152	Rho GTPase activating protein 10 [Source:RGD Symbol;Acc:1588859]	314.599	0.228946	0.406931	0.562616	0.573696	0.787406	0.726807	0.405706	1.79147	0.0732187	0.184371	1.00126	0.405973	2.46633	0.0136507	0.0635065	-0.0455089	0.404743	-0.112439	0.910475	0.979287	0.827612	0.405149	2.04273	0.0410787	0.104816	0.884027	0.407091	2.17157	0.0298881	0.0904235	0.472278	0.404873	1.16648	0.243419	0.412781	1.01839	0.407798	2.4973	0.0125142	0.0447917	0.36015	0.411556	0.875095	0.381522	1	-0.777458
Arhgap11a	ENSRNOG00000008115	Rho GTPase activating protein 11A [Source:RGD Symbol;Acc:1309107]	75.953	0.90117	0.50256	1.79316	0.0729478	0.227668	-1.97144	0.502027	-3.92696	8.60252e-05	0.000625	-1.30773	0.501598	-2.60712	0.00913069	0.0469381	0.237456	0.501056	0.473911	0.635563	0.840088	-1.13923	0.501965	-2.26955	0.023235	0.0654627	0.696514	0.502776	1.38534	0.165949	0.339095	-0.284857	0.501278	-0.568261	0.569858	0.726023	-0.0274833	0.502533	-0.0546896	0.956386	0.978127	0.172086	0.500144	0.344072	0.730792	1	0.131828
Arhgap12	ENSRNOG00000017791	Rho GTPase activating protein 12 [Source:RGD Symbol;Acc:1310017]	1132.35	0.377916	0.353444	1.06924	0.284963	0.54495	0.452013	0.353019	1.28042	0.200398	0.380254	0.309956	0.353419	0.877022	0.380475	0.617261	0.519972	0.352994	1.47303	0.140742	0.349015	1.01546	0.353026	2.87644	0.00402184	0.0147472	0.638654	0.353274	1.80781	0.0706356	0.179776	0.499795	0.353319	1.41457	0.157195	0.300336	0.343204	0.353436	0.97105	0.331523	0.533036	0.0823533	0.354186	0.232514	0.816139	1	-0.0751059
Arhgap15	ENSRNOG00000031168	Rho GTPase activating protein 15 [Source:RGD Symbol;Acc:1359304]	314.776	-0.508143	0.403013	-1.26086	0.207359	0.450379	1.04008	0.402268	2.58554	0.00972267	0.0375897	-0.232448	0.402275	-0.577834	0.563376	0.767097	0.764385	0.401527	1.90369	0.0569501	0.192148	-0.0159562	0.400175	-0.039873	0.968194	0.984873	-0.566719	0.402264	-1.40882	0.158887	0.327862	-0.56636	0.401454	-1.41077	0.158311	0.301899	0.0733174	0.401289	0.182705	0.85503	0.923997	0.130984	0.404515	0.323805	0.746085	1	-0.486209
Arhgap17	ENSRNOG00000013836	Rho GTPase activating protein 17 [Source:RGD Symbol;Acc:628767]	334.939	-0.669855	0.452116	-1.4816	0.138447	0.354171	1.52245	0.451525	3.3718	0.000746799	0.00425307	0.570657	0.450901	1.26559	0.205659	0.425922	0.281939	0.450306	0.626105	0.531246	0.766779	0.61468	0.450254	1.36518	0.172195	0.318599	-0.884682	0.451602	-1.95899	0.0501142	0.137413	0.372652	0.450503	0.827191	0.408129	0.589438	-0.271474	0.450745	-0.602278	0.546989	0.722205	-0.056369	0.451842	-0.124754	0.900718	1	-0.0229724
Arhgap18	ENSRNOG00000011245	Rho GTPase activating protein 18 [Source:RGD Symbol;Acc:1305053]	299.645	0.296504	0.457131	0.64862	0.516584	0.749521	-1.45392	0.459117	-3.16678	0.00154135	0.00793659	1.19521	0.456341	2.61911	0.00881589	0.0456824	-2.35263	0.458336	-5.13297	2.852e-07	8.29787e-06	-1.99397	0.4583	-4.35081	1.35636e-05	8.52299e-05	-1.1982	0.455699	-2.62937	0.00855441	0.0320082	0.436196	0.455326	0.957986	0.33807	0.518891	-1.12432	0.456095	-2.46511	0.0136972	0.0482918	0.36874	0.456431	0.807878	0.419161	1	0.655085
Arhgap20	ENSRNOG00000025624	Rho GTPase activating protein 20 [Source:RGD Symbol;Acc:1303160]	893.284	0.906689	0.392852	2.30796	0.0210011	0.0904391	-0.40817	0.392501	-1.03992	0.298377	0.497453	0.559912	0.39295	1.42489	0.154188	0.35397	-0.0613936	0.392599	-0.156377	0.875736	0.963087	-0.226078	0.392371	-0.576184	0.564491	0.720768	0.679347	0.392407	1.73123	0.0834104	0.202872	0.0971856	0.392491	0.247612	0.804434	0.89628	-0.346923	0.392785	-0.88324	0.377107	0.578077	-0.119401	0.393077	-0.303761	0.76131	1	-0.49654
Arhgap21	ENSRNOG00000008659	Rho GTPase activating protein 21 [Source:RGD Symbol;Acc:1311028]	8948.92	1.57551	0.115707	13.6164	3.20153e-42	5.23907e-39	-1.84135	0.115795	-15.9018	6.15385e-57	1.79878e-54	1.33756	0.115726	11.558	6.72827e-31	2.45734e-28	-1.6034	0.115814	-13.8446	1.37079e-43	4.30735e-40	1.01705	0.116665	8.71767	2.83991e-18	5.82727e-17	2.98785	0.116227	25.7069	9.78428e-146	5.73995e-142	2.3828	0.116121	20.52	1.42617e-93	4.84473e-91	1.18911	0.116385	10.217	1.66355e-24	6.81998e-23	-0.223195	0.117383	-1.90142	0.0572473	1	-0.129431
Arhgap22	ENSRNOG00000024728	Rho GTPase activating protein 22 [Source:RGD Symbol;Acc:1307237]	507.807	0.730608	0.339695	2.15078	0.0314938	0.123173	-0.139086	0.338659	-0.410696	0.681296	0.825314	0.737537	0.339551	2.1721	0.0298485	0.113755	-0.146015	0.338515	-0.43134	0.666221	0.85922	0.244726	0.338473	0.723029	0.469662	0.641402	0.399699	0.338415	1.18109	0.237566	0.435262	0.606762	0.338755	1.79115	0.0732685	0.16585	-0.478432	0.339207	-1.41044	0.158408	0.320985	-0.146852	0.342175	-0.429173	0.667797	1	-0.0158209
Arhgap24	ENSRNOG00000056944	Rho GTPase activating protein 24 [Source:RGD Symbol;Acc:1306669]	190.065	-0.469324	0.455852	-1.02955	0.30322	0.563851	0.847849	0.455384	1.86184	0.0626263	0.163575	-1.23053	0.457145	-2.69177	0.00710746	0.0387816	1.60905	0.456681	3.52337	0.0004261	0.00453485	0.311905	0.454112	0.686846	0.49218	0.661207	-1.07691	0.454896	-2.36738	0.0179147	0.0598671	-0.877048	0.45714	-1.91855	0.0550409	0.132252	-0.115881	0.454408	-0.255016	0.798711	0.89231	0.487593	0.456754	1.06752	0.285739	1	0.536404
Arhgap25	ENSRNOG00000009347	Rho GTPase activating protein 25 [Source:RGD Symbol;Acc:1562105]	906.259	-0.234711	0.342403	-0.685481	0.49304	0.73405	1.18108	0.341692	3.45657	0.000547092	0.00325279	0.573073	0.341612	1.67756	0.0934337	0.253863	0.373297	0.340898	1.09504	0.273499	0.527464	0.515742	0.340739	1.5136	0.130127	0.259008	0.0936427	0.342196	0.273652	0.784352	0.887445	-0.04142	0.340926	-0.121493	0.903301	0.955528	0.193112	0.341708	0.565139	0.57198	0.741379	-0.134928	0.343337	-0.392989	0.694327	1	-0.75732
Arhgap26	ENSRNOG00000013920	Rho GTPase activating protein 26 [Source:RGD Symbol;Acc:1310923]	1185.75	0.1388	0.264464	0.524834	0.599698	0.80515	-0.964372	0.265139	-3.63723	0.000275587	0.00177179	-0.315517	0.264705	-1.19196	0.233278	0.460006	-0.510055	0.26538	-1.92198	0.0546086	0.186464	0.323983	0.265757	1.21909	0.222809	0.384681	0.873143	0.264592	3.29995	0.000967004	0.005007	0.768929	0.265362	2.89766	0.00375954	0.0136519	0.983781	0.264747	3.71592	0.000202464	0.00123955	0.248941	0.267675	0.930011	0.352366	1	0.414378
Arhgap27	ENSRNOG00000028569	Rho GTPase activating protein 27 [Source:RGD Symbol;Acc:735202]	199.841	0.255213	0.481472	0.530069	0.596064	0.802623	-0.217521	0.481407	-0.451845	0.651381	0.804619	0.0671121	0.481505	0.13938	0.88915	0.962616	-0.0294201	0.48144	-0.0611086	0.951273	0.994311	0.694043	0.481604	1.44111	0.149554	0.287934	0.706049	0.481412	1.46662	0.142479	0.303175	0.74257	0.481704	1.54155	0.123183	0.249082	0.222576	0.481357	0.462393	0.6438	0.793975	-0.226391	0.482701	-0.469008	0.639064	1	0.203651
Arhgap28	ENSRNOG00000017065	Rho GTPase activating protein 28 [Source:RGD Symbol;Acc:1559882]	63.0905	0.689041	0.504591	1.36554	0.172082	0.404535	-0.964912	0.504461	-1.91276	0.0557789	0.150501	1.54421	0.504846	3.05877	0.00222247	0.0152563	-1.82008	0.504717	-3.60614	0.000310788	0.00350723	-1.27353	0.504696	-2.52336	0.0116239	0.036651	-0.190739	0.505126	-0.377607	0.705723	0.83918	0.83024	0.505291	1.64309	0.100364	0.213159	-1.06164	0.504869	-2.10281	0.0354823	0.10355	-0.179003	0.504216	-0.355013	0.72258	1	-0.115997
Arhgap29	ENSRNOG00000012563	Rho GTPase activating protein 29 [Source:RGD Symbol;Acc:1306185]	165.462	0.140485	0.49698	0.282677	0.777425	0.901488	-0.101932	0.49693	-0.205124	0.837476	0.919081	0.298218	0.496878	0.600184	0.548384	0.75544	-0.259666	0.496828	-0.522647	0.60122	0.81712	0.38628	0.496905	0.777372	0.43694	0.610484	-0.284672	0.496666	-0.573166	0.566533	0.747372	0.0192932	0.496653	0.0388464	0.969013	0.989401	-0.00442101	0.496781	-0.00889931	0.992899	0.99655	0.417435	0.49723	0.83952	0.401178	1	0.766172
Arhgap30	ENSRNOG00000004192	Rho GTPase activating protein 30 [Source:RGD Symbol;Acc:1561419]	139.532	-0.0333149	0.507069	-0.065701	0.947616	0.976151	0.194317	0.507084	0.383205	0.701568	0.837338	-0.494093	0.507041	-0.974464	0.329826	0.568449	0.655095	0.507056	1.29196	0.196372	0.432032	1.47077	0.507015	2.90085	0.00372156	0.0137886	0.486955	0.507071	0.960329	0.336889	0.548955	-0.327842	0.507053	-0.646562	0.517915	0.68458	0.458954	0.507088	0.905077	0.365425	0.566677	-0.0607425	0.506547	-0.119915	0.904551	1	0.778773
Arhgap31	ENSRNOG00000003088	Rho GTPase activating protein 31 [Source:RGD Symbol;Acc:1306093]	90.8834	-0.106344	0.501429	-0.212081	0.832044	0.927202	-0.243152	0.501355	-0.48499	0.627683	0.788779	-0.463756	0.501358	-0.925	0.354966	0.595273	0.11426	0.501284	0.227934	0.819697	0.939349	0.0865538	0.501412	0.17262	0.86295	0.923832	-0.299245	0.501577	-0.596608	0.550769	0.735675	-0.327529	0.50141	-0.653217	0.513616	0.681581	-0.16556	0.501629	-0.330044	0.741367	0.859419	0.027141	0.500829	0.054192	0.956782	1	0.623069
Arhgap35	ENSRNOG00000015852	Rho GTPase activating protein 35 [Source:RGD Symbol;Acc:1308738]	8533.63	0.204964	0.137677	1.48873	0.136559	0.350972	0.187645	0.137559	1.36411	0.172534	0.342534	0.524419	0.137579	3.81176	0.000137982	0.00152936	-0.131811	0.137461	-0.958894	0.337612	0.597124	1.5191	0.137826	11.0219	2.99548e-28	9.97764e-27	1.25533	0.137847	9.10668	8.49421e-20	3.3332e-18	1.47514	0.137793	10.7055	9.59607e-27	3.39755e-25	1.05954	0.13784	7.68669	1.50986e-14	3.06878e-13	0.00917246	0.138157	0.0663916	0.947066	1	0.076128
Arhgap39	ENSRNOG00000016566	Rho GTPase activating protein 39 [Source:RGD Symbol;Acc:1593158]	1626.29	0.780851	0.300784	2.59605	0.00943014	0.0490564	-0.709694	0.300689	-2.36023	0.0182636	0.0627775	0.749032	0.300751	2.49054	0.0127549	0.0605968	-0.677875	0.300655	-2.25466	0.0241548	0.10498	0.332164	0.300915	1.10385	0.269659	0.441682	1.50119	0.300894	4.9891	6.06614e-07	6.08343e-06	0.610238	0.300477	2.0309	0.0422652	0.106974	0.0921852	0.300838	0.306427	0.759279	0.869609	-0.627535	0.301905	-2.07859	0.0376555	1	-0.458873
Arhgap4	ENSRNOG00000058545	Rho GTPase activating protein 4 [Source:RGD Symbol;Acc:628901]	184.536	0.717019	0.507637	1.41246	0.157813	0.384754	-0.695651	0.507641	-1.37036	0.170574	0.340039	0.646357	0.507638	1.27326	0.202924	0.422487	-0.62499	0.507642	-1.23116	0.218262	0.461154	-0.0430443	0.507638	-0.0847932	0.932426	0.963954	0.814103	0.507652	1.60366	0.108789	0.24833	0.672978	0.50765	1.32568	0.184947	0.338567	0.354683	0.507628	0.698708	0.484735	0.674306	0.256122	0.507263	0.504909	0.613623	1	-0.160708
Arhgap5	ENSRNOG00000004696	Rho GTPase activating protein 5 [Source:RGD Symbol;Acc:1308507]	2854.08	0.248	0.256223	0.967907	0.333091	0.592661	0.411297	0.255959	1.60689	0.108079	0.244976	0.189041	0.2562	0.737867	0.460595	0.689275	0.470256	0.255936	1.8374	0.0661508	0.212974	0.970576	0.255963	3.79187	0.00014952	0.000777717	0.561549	0.25612	2.19252	0.0283417	0.0868958	0.235082	0.256072	0.918032	0.358602	0.542026	0.455402	0.25621	1.77746	0.0754932	0.185825	0.141802	0.256512	0.552809	0.580394	1	-0.00226852
Arhgap8	ENSRNOG00000033570	Rho GTPase activating protein 8 [Source:RGD Symbol;Acc:1303143]	8.65209	-0.297416	0.259523	-1.14601	0.251791	NA	0	0.259346	0	1	NA	-0.297631	0.259634	-1.14635	0.25165	NA	0	0.259456	0	1	NA	-0.125089	0.259863	-0.481366	0.630257	NA	-0.242078	0.259852	-0.9316	0.351543	NA	-0.0576199	0.25972	-0.221854	0.824428	NA	0.149441	0.26016	0.574421	0.565683	NA	0.074404	0.232247	0.320366	0.748691	1	0.0923496
Arhgap9	ENSRNOG00000006946	Rho GTPase activating protein 9 [Source:RGD Symbol;Acc:1305342]	314.357	0.257175	0.507695	0.506555	0.612467	0.812307	0.014834	0.507687	0.0292187	0.97669	0.993694	0.00843008	0.507697	0.0166045	0.986752	1	0.263579	0.50769	0.519173	0.60364	0.818708	-0.263522	0.507674	-0.519076	0.603708	0.749444	-0.0995991	0.507678	-0.196185	0.844465	0.922673	-0.453675	0.507682	-0.893619	0.371526	0.554071	-0.355524	0.507682	-0.700289	0.483747	0.673696	0.00124959	0.507369	0.00246288	0.998035	1	-0.178587
Arhgdia	ENSRNOG00000036688	Rho GDP dissociation inhibitor (GDI) alpha [Source:RGD Symbol;Acc:1359547]	19873.6	0.14394	0.0902064	1.59568	0.110561	0.303621	-0.364455	0.0902509	-4.03824	5.38533e-05	0.000408498	-0.0701672	0.0902338	-0.777616	0.436796	0.66765	-0.150348	0.0902784	-1.66538	0.0958374	0.272414	-0.896888	0.0900346	-9.96159	2.24433e-23	6.07602e-22	-0.679478	0.0899314	-7.55551	4.17208e-14	1.02408e-12	-0.649291	0.0900211	-7.21265	5.48731e-13	8.23031e-12	-0.873841	0.0899444	-9.71534	2.59372e-22	9.24503e-21	-0.050425	0.0893372	-0.564434	0.572459	1	0.147053
Arhgdib	ENSRNOG00000005809	Rho, GDP dissociation inhibitor (GDI) beta [Source:RGD Symbol;Acc:1305383]	1444.71	0.0709252	0.355609	0.199447	0.841913	0.932688	0.138978	0.355466	0.390973	0.695817	0.833323	0.501249	0.35537	1.4105	0.158393	0.359695	-0.291346	0.355227	-0.820166	0.412121	0.668577	-0.138578	0.355138	-0.390209	0.696382	0.819222	-0.140592	0.355287	-0.395715	0.692315	0.830396	-0.0679893	0.355001	-0.191518	0.848119	0.924019	-0.307075	0.355239	-0.864418	0.387358	0.588906	-0.0955002	0.355232	-0.268839	0.788053	1	-0.136881
Arhgef1	ENSRNOG00000020130	Rho guanine nucleotide exchange factor (GEF) 1 [Source:RGD Symbol;Acc:620951]	875.845	0.52326	0.308584	1.69568	0.0899464	0.265004	-0.6121	0.308591	-1.98353	0.0473082	0.133088	0.0867802	0.308877	0.280953	0.778746	0.901492	-0.17562	0.308885	-0.568563	0.569653	0.797235	-0.158875	0.308514	-0.514968	0.606575	0.75163	0.57627	0.308082	1.87051	0.0614129	0.161307	-0.376759	0.308142	-1.22268	0.22145	0.386692	-0.448239	0.308141	-1.45465	0.145765	0.302301	-0.499988	0.310444	-1.61056	0.107275	1	-0.122727
Arhgef11	ENSRNOG00000015026	Rho guanine nucleotide exchange factor (GEF) 11 [Source:RGD Symbol;Acc:619705]	894.215	0.732216	0.26694	2.743	0.00608816	0.0346104	-2.01505	0.269239	-7.48426	7.19537e-14	1.79086e-12	-1.15452	0.26955	-4.28314	1.84274e-05	0.000265005	-0.128316	0.271822	-0.47206	0.636884	0.841391	-1.01911	0.269632	-3.77963	0.00015706	0.000813104	0.874161	0.266489	3.28029	0.00103701	0.0053132	-1.27056	0.269053	-4.72233	2.33153e-06	1.67553e-05	-0.168071	0.266816	-0.629913	0.528752	0.708517	-0.309193	0.270321	-1.1438	0.252706	1	0.121452
Arhgef12	ENSRNOG00000008924	Rho guanine nucleotide exchange factor (GEF) 12 [Source:RGD Symbol;Acc:1305111]	574.578	-0.556859	0.314385	-1.77127	0.0765163	0.235174	-0.330049	0.315336	-1.04666	0.295258	0.494155	-0.997497	0.314858	-3.16808	0.00153449	0.0114124	0.110589	0.315808	0.350177	0.726205	0.893119	0.352267	0.315519	1.11647	0.264222	0.435153	0.301299	0.314678	0.957482	0.338324	0.550576	0.020943	0.315599	0.0663597	0.947091	0.978085	0.917206	0.313944	2.92156	0.00348284	0.0152518	0.0587983	0.318777	0.184449	0.853661	1	0.379379
Arhgef15	ENSRNOG00000004566	Rho guanine nucleotide exchange factor (GEF) 15 [Source:RGD Symbol;Acc:1306961]	167.719	0.379059	0.487082	0.778225	0.436437	0.690141	-0.755169	0.48728	-1.54976	0.121198	0.265761	-1.26973	0.488347	-2.60005	0.00932095	0.0476434	0.893617	0.488542	1.82915	0.0673771	0.216036	-0.28066	0.487245	-0.576016	0.564605	0.720768	0.00584623	0.486655	0.0120131	0.990415	0.997215	-0.452738	0.488671	-0.926468	0.354203	0.537159	-0.290345	0.486827	-0.596402	0.550907	0.72528	0.0822627	0.487863	0.168618	0.866097	1	0.464918
Arhgef16	ENSRNOG00000046803	Rho guanine nucleotide exchange factor (GEF) 16 [Source:RGD Symbol;Acc:1588981]	49.6606	0.25887	0.505026	0.512588	0.608239	0.809759	-2.25783	0.503592	-4.48346	7.34422e-06	6.6891e-05	-1.99999	0.503539	-3.97187	7.13115e-05	0.000869364	0	0.502055	0	1	1	-1.12622	0.503389	-2.23728	0.025268	0.0701533	0.64754	0.505077	1.28206	0.199821	0.386672	0	0.502407	0	1	1	0.460398	0.505031	0.911625	0.361966	0.563497	0.0646653	0.496389	0.130272	0.896352	1	0.428879
Arhgef18	ENSRNOG00000028090	rho/rac guanine nucleotide exchange factor (GEF) 18 [Source:RGD Symbol;Acc:1311448]	2303.74	0.486794	0.25046	1.9436	0.0519436	0.177669	-1.03652	0.250725	-4.13411	3.56335e-05	0.000278704	0.31052	0.25048	1.2397	0.215086	0.437859	-0.860251	0.250745	-3.43078	0.000601847	0.00602278	0.152258	0.251006	0.606592	0.544122	0.704884	1.42718	0.250669	5.69348	1.24479e-08	1.59097e-07	0.940511	0.250624	3.75268	0.000174956	0.000893183	0.659495	0.250625	2.6314	0.00850328	0.0324362	-0.280683	0.251847	-1.1145	0.265065	1	-0.238221
Arhgef19	ENSRNOG00000047967	Rho guanine nucleotide exchange factor (GEF) 19 [Source:RGD Symbol;Acc:1304766]	400.306	-0.266482	0.417933	-0.637619	0.523721	0.753813	-0.190706	0.418306	-0.455902	0.648461	0.802689	0.331561	0.417326	0.794491	0.42691	0.658626	-0.78875	0.4177	-1.88832	0.0589833	0.197042	-0.402377	0.417672	-0.963381	0.335357	0.511335	-0.114146	0.417621	-0.273326	0.784603	0.887643	0.318291	0.417038	0.763218	0.445334	0.624779	-0.063476	0.417122	-0.152176	0.879048	0.938339	-0.214799	0.41915	-0.512464	0.608326	1	-0.0970582
Arhgef2	ENSRNOG00000020027	rho/rac guanine nucleotide exchange factor (GEF) 2 [Source:RGD Symbol;Acc:1304659]	3682.85	0.76173	0.158492	4.80612	1.53888e-06	2.72455e-05	-0.235798	0.158066	-1.49177	0.135759	0.28843	1.0151	0.158322	6.41162	1.43977e-10	6.39451e-09	-0.489172	0.157896	-3.09806	0.00194792	0.0154498	0.216483	0.158017	1.37	0.170688	0.316715	0.824175	0.158131	5.21198	1.86832e-07	2.05008e-06	0.994756	0.158037	6.29444	3.08502e-10	3.55739e-09	0.150507	0.158587	0.94905	0.342595	0.544557	0.0880108	0.159852	0.550575	0.581925	1	-0.371677
Arhgef25	ENSRNOG00000005034	Rho guanine nucleotide exchange factor (GEF) 25 [Source:RGD Symbol;Acc:735210]	5607.74	-0.157711	0.130185	-1.21144	0.225729	0.474724	0.399157	0.130041	3.06946	0.00214446	0.0104919	0.272723	0.129928	2.09904	0.0358137	0.130893	-0.0312771	0.129783	-0.240995	0.809559	0.932748	0.503213	0.129825	3.87608	0.000106154	0.000568019	0.46489	0.130217	3.57012	0.000356821	0.00208184	0.695676	0.129961	5.35297	8.65225e-08	7.63159e-07	0.559115	0.130017	4.30034	1.7054e-05	0.000129982	-0.0634646	0.131242	-0.48357	0.628691	1	-0.360711
Arhgef28	ENSRNOG00000016544	Rho guanine nucleotide exchange factor (GEF) 28 [Source:RGD Symbol;Acc:1307061]	970.988	0.0843836	0.310091	0.272125	0.785526	0.904395	-0.778418	0.310608	-2.50611	0.0122068	0.0452855	0.114295	0.309998	0.368698	0.712353	0.865999	-0.80833	0.310515	-2.60319	0.00923604	0.0522212	0.714898	0.311473	2.29521	0.0217208	0.0618704	0.833913	0.310228	2.68806	0.0071868	0.0276201	1.05996	0.310491	3.41382	0.00064058	0.0028663	0.582405	0.310046	1.87845	0.0603196	0.156967	-0.166755	0.312531	-0.533562	0.593644	1	0.657853
Arhgef3	ENSRNOG00000014363	Rho guanine nucleotide exchange factor (GEF) 3 [Source:RGD Symbol;Acc:1310672]	2694.66	0.564315	0.205203	2.75004	0.00595886	0.0340957	0.635335	0.204299	3.10982	0.00187199	0.00936292	0.805114	0.204969	3.92798	8.56641e-05	0.00102252	0.394536	0.204065	1.93338	0.0531889	0.18344	0.25548	0.203796	1.25361	0.209985	0.368757	0.356067	0.20457	1.74056	0.08176	0.199769	-0.170426	0.204043	-0.835247	0.403579	0.584197	-0.481362	0.204818	-2.3502	0.0187635	0.0627819	-0.272909	0.205684	-1.32684	0.184563	1	-0.735376
[truncated: 13,728 more rows]
[truncated: 50 more columns]
