# Supplementary material for: Axon TRAP reveals learning-associated alterations in cortical axonal mRNAs in the lateral amygdala
Source: eLife. 2019 Dec 11;8:e51607. doi: 10.7554/eLife.51607 (PMC6924958; doi:10.7554/eLife.51607)
Supplement: Supplementary file 3. [file elife-51607-supp3.xlsx]

## Sheet: Supplementary file 3
Results of Differential Gene Expression Analysis, YFP-IP				Control axons YFP-IP versus trained axons YFP-IP					Control cortex YFP-IP versus control axons YFP-IP					Trained cortex YFP-IP versus trained axons YFP-IP					Control cortex YFP-IP versus trained cortex YFP-IP					Control cortex, YFP-IP versus tissue transcriptome					Control axons, YFP-IP versus tissue transcriptome					Trained cortex, YFP-IP versus tissue transcriptome					Trained axons, YFP-IP versus tissue transcriptome					Control axons tissue transcriptome versus trained axons tissue transcriptome					Control axons tissue transcriptome versus control cortex tissue transcriptome
Gene symbol	ensembl_gene_id	description	mean counts	log2FoldChange	lfcSE	stat	pvalue	padj	log2FoldChange	lfcSE	stat	pvalue	padj	log2FoldChange	lfcSE	stat	pvalue	padj	log2FoldChange	lfcSE	stat	pvalue	padj	log2FoldChange	lfcSE	stat	pvalue	padj	log2FoldChange	lfcSE	stat	pvalue	padj	log2FoldChange	lfcSE	stat	pvalue	padj	log2FoldChange	lfcSE	stat	pvalue	padj	log2FoldChange	lfcSE	stat	pvalue	padj	log2FoldChange
A2m	ENSRNOG00000045772	alpha-2-macroglobulin [Source:RGD Symbol;Acc:2004]	0.803502	-0.0380929	0.143845	-0.264819	0.791149	NA	0.0379425	0.143886	-0.263699	0.792012	NA	-0.00700177	0.143547	0.048777	0.961097	NA	0.00685136	0.143588	0.0477155	0.961943	NA	0.0604351	0.144275	0.418889	0.675297	NA	-0.0176485	0.145155	-0.121584	0.903229	NA	0.0140127	0.144803	0.0967708	0.922908	NA	0.0233902	0.144482	0.16189	0.871392	NA	0.00294586	0.14579	0.0202062	0.983879	1	0.0401412
A3galt2	ENSRNOG00000005935	alpha 1,3-galactosyltransferase 2 [Source:RGD Symbol;Acc:727913]	43.8757	0.54165	0.400877	1.35116	0.176643	0.508905	-0.704902	0.400719	1.75909	0.0785622	0.25589	0.1889	0.400516	-0.471641	0.637183	0.857741	-0.352151	0.400358	-0.87959	0.379081	0.806556	-0.477463	0.400721	-1.19151	0.233453	0.416878	0.0915639	0.401693	0.227945	0.819689	0.894655	-0.00929216	0.401183	-0.0231619	0.981521	0.990282	-0.302394	0.400932	-0.754228	0.450712	0.626706	0.147692	0.401747	0.367625	0.713153	1	0.135875
A4galt	#N/A	#N/A	2.15823	0	0.101934	0	1	NA	0.179762	0.101998	-1.76241	0.0780007	NA	0	0.101882	0	1	NA	0.179725	0.101947	1.76293	0.0779129	NA	0.179806	0.102058	1.7618	0.0781033	NA	-0.0342482	0.102134	-0.335327	0.737379	NA	0	0.102068	0	1	NA	0	0.102019	0	1	NA	0.0343103	0.102219	0.335655	0.737131	1	0.0342919
AA926063	ENSRNOG00000000478	AA926063gene [Source:RGD Symbol;Acc:1303072]	15.3624	-0.301555	0.442979	-0.680742	0.496035	0.785531	0.0257453	0.442497	-0.0581819	0.953604	0.98798	-0.626821	0.441975	1.41823	0.156124	0.430651	0.351012	0.441491	0.79506	0.426578	0.836121	0.666495	0.441689	1.50897	0.131307	0.278947	0.589002	0.442612	1.33074	0.183275	0.332511	0.306116	0.441452	0.693431	0.488039	NA	0.906842	0.442482	2.04944	0.0404189	0.110754	0.0162858	0.442115	0.0368361	0.970616	1	0.0517478
Aaas	ENSRNOG00000013445	achalasia, adrenocortical insufficiency, alacrimia [Source:RGD Symbol;Acc:1308701]	439.524	0.197287	0.318411	0.619599	0.535522	0.809569	-0.114715	0.31816	0.360558	0.71843	0.878282	0.304056	0.318533	-0.954554	0.339804	0.643731	-0.221485	0.318282	-0.695875	0.486507	0.86485	-0.70192	0.317012	-2.21418	0.0268165	0.083739	-0.673018	0.315904	-2.13045	0.0331344	0.0910594	-0.268098	0.316364	-0.847433	0.396754	0.592385	-0.632416	0.31731	-1.99305	0.0462555	0.122976	0.237889	0.314793	0.755701	0.449829	1	0.0858131
Aacs	ENSRNOG00000000967	acetoacetyl-CoA synthetase [Source:RGD Symbol;Acc:708522]	859.896	0.422993	0.239075	1.76929	0.0768451	0.342097	0.181667	0.237769	-0.764048	0.444839	0.693995	-0.235331	0.240796	0.977304	0.328418	0.632772	0.839991	0.239501	3.50725	0.000452756	0.0432681	-0.0930153	0.237105	-0.392295	0.69484	0.82739	-0.348287	0.236689	-1.4715	0.141157	0.274702	-1.11553	0.23836	-4.68003	2.86835e-06	3.18924e-05	-0.904279	0.238104	-3.79784	0.000145965	0.000949079	-0.132999	0.235707	-0.564256	0.57258	1	0.0736046
Aadat	ENSRNOG00000011861	aminoadipate aminotransferase [Source:RGD Symbol;Acc:2948]	198.152	0.123672	0.417549	0.296184	0.767089	0.924392	-0.130959	0.417538	0.313644	0.753791	0.89793	-0.307175	0.41814	0.734623	0.462569	0.74704	0.299888	0.418129	0.717214	0.473242	0.858305	0.0892735	0.417531	0.213813	0.830693	0.911283	0.641195	0.417375	1.53626	0.124475	0.251548	-0.309868	0.417569	-0.742075	0.458042	0.647694	0.48528	0.417787	1.16155	0.245419	0.420014	-0.0322439	0.417612	-0.07721	0.938456	1	-0.420963
Aaed1	ENSRNOG00000018886	AhpC/TSA antioxidant enzyme domain containing 1 [Source:RGD Symbol;Acc:1589650]	126.412	-1.00477	0.4203	-2.3906	0.0168207	0.161217	0.292285	0.421697	-0.693116	0.488236	0.726052	-0.144626	0.418915	0.34524	0.729914	0.907093	-0.567859	0.420321	-1.35101	0.176691	0.639908	-0.467092	0.419883	-1.11243	0.265952	0.453459	-0.763647	0.419674	-1.81962	0.0688171	0.161074	0.0478989	0.418268	0.114517	0.908828	0.954034	0.302682	0.418408	0.723414	0.469425	0.643652	0.0615582	0.417776	0.147347	0.882858	1	0.00426994
Aagab	ENSRNOG00000008424	alpha- and gamma-adaptin binding protein [Source:RGD Symbol;Acc:621601]	869.726	0.241609	0.268092	0.901218	0.367472	0.692612	-0.177938	0.267876	0.664255	0.506527	0.738796	0.437074	0.268048	-1.63058	0.102979	0.34004	-0.373402	0.267833	-1.39416	0.163268	0.62758	-1.3777	0.266167	-5.17609	2.26582e-07	3.01134e-06	-0.862156	0.265246	-3.2504	0.00115243	0.00537946	-1.09095	0.264924	-4.11798	3.82213e-05	0.000324868	-1.25979	0.266437	-4.72828	2.26434e-06	2.2067e-05	-0.156022	0.263571	-0.591955	0.55388	1	-0.337609
Aak1	ENSRNOG00000018317	AP2 associated kinase 1 [Source:RGD Symbol;Acc:1305520]	3677.78	-0.202129	0.145812	-1.38623	0.165677	0.494039	0.468323	0.145627	-3.21591	0.00130031	0.0149939	0.343146	0.145594	-2.35688	0.0184294	0.118405	-0.0769524	0.145408	-0.529217	0.596655	0.909659	0.515285	0.145513	3.54116	0.000398366	0.00246618	0.348831	0.145717	2.39389	0.0166706	0.0525345	0.643594	0.145366	4.42739	9.53794e-06	9.43759e-05	0.58309	0.145842	3.99811	6.38506e-05	0.000452386	0.03213	0.145746	0.220452	0.825519	1	-0.301869
Aamdc	ENSRNOG00000012584	adipogenesis associated, Mth938 domain containing [Source:RGD Symbol;Acc:1561459]	428.159	0.214942	0.264829	0.811626	0.417006	0.727263	-0.172852	0.264721	0.652959	0.513783	0.743873	-0.00101772	0.265397	0.0038347	0.99694	1	0.0431077	0.26529	0.162493	0.870918	0.987553	1.28069	0.267163	4.79368	1.63753e-06	1.81227e-05	1.65358	0.266624	6.20194	5.57728e-10	9.47062e-09	1.30275	0.266892	4.88119	1.05445e-06	1.25329e-05	1.41174	0.267462	5.27827	1.30412e-07	1.57619e-06	-0.0269061	0.269237	-0.0999345	0.920396	1	-0.20004
Aamp	ENSRNOG00000014399	angio-associated, migratory cell protein [Source:RGD Symbol;Acc:1306281]	5727.05	0.253187	0.124374	2.03568	0.0417821	0.259731	-0.169246	0.124291	1.36169	0.173295	0.412071	0.139434	0.124556	-1.11945	0.262946	0.563125	-0.0554932	0.124472	-0.445829	0.655721	0.935537	-0.54449	0.124006	-4.39083	1.12919e-05	0.000104348	-0.488261	0.123597	-3.95044	7.80078e-05	0.000502708	-0.431866	0.123849	-3.48704	0.000488396	0.00304406	-0.721034	0.124019	-5.81389	6.10358e-09	9.13167e-08	0.0204141	0.123239	0.165646	0.868435	1	0.113016
Aanat	ENSRNOG00000011182	aralkylamine N-acetyltransferase [Source:RGD Symbol;Acc:2006]	7.60665	0	0.268626	0	1	NA	0.428368	0.269402	-1.59007	0.11182	0.31536	0	0.268329	0	1	1	0.427556	0.269106	1.5888	0.112105	NA	0.309214	0.269911	1.14561	0.251955	NA	-0.134746	0.269907	-0.499231	0.617616	NA	0	0.2694	0	1	NA	-0.119935	0.269275	-0.445399	0.656031	NA	0.0132347	0.270554	0.0489171	0.960985	1	0.0155923
Aar2	ENSRNOG00000020086	AAR2 splicing factor homolog [Source:RGD Symbol;Acc:1311066]	391.626	-0.765856	0.375933	-2.03721	0.0416288	0.259313	0.599681	0.376158	-1.59423	0.110885	0.313794	-0.463857	0.375692	1.23467	0.216953	0.509531	0.297681	0.375917	0.79188	0.428431	0.83677	-0.820709	0.37422	-2.19312	0.0282988	0.0873706	-1.26854	0.374753	-3.38501	0.000711765	0.00352395	-1.02311	0.374496	-2.73196	0.00629595	0.0269908	-0.697288	0.373902	-1.8649	0.062196	0.155104	-0.194602	0.372712	-0.522125	0.601583	1	-0.151848
Aard	ENSRNOG00000004708	alanine and arginine rich domain containing protein [Source:RGD Symbol;Acc:631378]	140.604	0.971654	0.398152	2.44041	0.0146706	0.149084	0.242961	0.394019	-0.616623	0.537483	0.762266	1.50816	0.397464	-3.79445	0.000147969	0.00391981	-0.293545	0.393319	-0.746326	0.45547	0.851301	0.315447	0.393699	0.801239	0.422993	0.610996	0.188343	0.393519	0.478612	0.632215	0.765914	0.731504	0.392897	1.86182	0.0626284	0.164498	-0.98708	0.397484	-2.48332	0.0130165	0.0442546	-0.203768	0.392838	-0.518708	0.603964	1	-0.115857
Aars	ENSRNOG00000018404	alanyl-tRNA synthetase [Source:RGD Symbol;Acc:1304832]	2812.59	0.273122	0.193116	1.41429	0.157276	0.483381	-0.437872	0.193227	2.2661	0.0234453	0.118069	0.0344651	0.193342	-0.17826	0.858519	0.964228	-0.199215	0.193453	-1.02978	0.303113	0.753381	-0.0585067	0.193302	-0.302669	0.762142	0.870266	0.219752	0.192697	1.1404	0.254119	0.419213	0.247093	0.193068	1.27983	0.200606	0.378693	0.0445864	0.193106	0.230891	0.8174	0.89724	0.0979562	0.192688	0.508368	0.611196	1	0.159613
Aars2	ENSRNOG00000025808	alanyl-tRNA synthetase 2, mitochondrial [Source:RGD Symbol;Acc:1310617]	185.962	-0.590534	0.397882	-1.48419	0.137758	0.454201	0.580903	0.397868	-1.46004	0.144279	0.368512	-0.278637	0.397585	0.700824	0.483413	0.760828	0.269006	0.397571	0.676625	0.498644	0.870735	-0.116668	0.396318	-0.294379	0.768468	0.874228	-0.412975	0.39707	-1.04006	0.298314	0.467474	-0.400007	0.396447	-1.00898	0.312984	0.509363	-0.273378	0.396027	-0.690302	0.490005	0.660627	-0.450937	0.395209	-1.14101	0.253866	1	-0.284595
Aarsd1	ENSRNOG00000020658	alanyl-tRNA synthetase domain containing 1 [Source:RGD Symbol;Acc:1561650]	2936.89	0.0494356	0.135855	0.363884	0.715945	0.902068	0.0545957	0.135747	-0.402187	0.687546	0.860023	0.079513	0.135963	-0.584816	0.558672	0.80955	0.0245182	0.135854	0.180474	0.85678	0.983462	0.708301	0.136102	5.20418	1.9486e-07	2.63334e-06	0.504671	0.135654	3.72028	0.000199	0.00113315	0.627938	0.135866	4.62174	3.80544e-06	4.11905e-05	0.452617	0.135981	3.32853	0.000873059	0.0045242	-0.00261862	0.13578	-0.0192858	0.984613	1	0.149034
Aasdhppt	ENSRNOG00000005795	aminoadipate-semialdehyde dehydrogenase-phosphopantetheinyl transferase [Source:RGD Symbol;Acc:1311360]	786.631	-0.247639	0.293288	-0.844353	0.398472	0.712928	0.270474	0.293237	-0.922374	0.356333	0.618059	0.312714	0.292868	-1.06776	0.285627	0.587787	-0.289878	0.292817	-0.989966	0.322191	0.769612	-0.156064	0.292586	-0.533395	0.59376	0.752972	-0.3968	0.292463	-1.35675	0.17486	0.321455	0.0132808	0.29196	0.0454884	0.963718	0.982541	-0.0572611	0.292648	-0.195665	0.844872	0.91332	0.0919001	0.291821	0.314919	0.752823	1	-0.0297381
Aass	ENSRNOG00000039494	aminoadipate-semialdehyde synthase [Source:RGD Symbol;Acc:1310811]	62.3216	-0.658227	0.460891	-1.42816	0.153246	0.477493	0.340162	0.460925	-0.737998	0.460516	0.704854	-0.128449	0.46085	0.278722	0.780458	0.928247	-0.189616	0.460885	-0.411417	0.680767	0.944683	-0.300889	0.460828	-0.652932	0.5138	0.689476	-0.679163	0.460814	-1.47383	0.140526	0.274111	-0.177338	0.460772	-0.384871	0.700333	0.832595	-0.449051	0.460737	-0.974637	0.329741	0.511155	-0.428115	0.460656	-0.929359	0.352703	1	0.0381121
Aatf	ENSRNOG00000002778	apoptosis antagonizing transcription factor [Source:RGD Symbol;Acc:620685]	411.277	-0.268329	0.327296	-0.819834	0.412311	0.72318	-0.703772	0.329026	2.13896	0.0324393	0.145356	-0.645717	0.328127	1.96789	0.0490811	0.219938	-0.326385	0.329851	-0.98949	0.322423	0.769785	-0.53682	0.328951	-1.63192	0.102697	0.232745	0.128338	0.326952	0.39253	0.694667	0.811817	-0.0119382	0.328099	-0.0363861	0.970975	0.985393	0.414296	0.327072	1.26668	0.205269	0.371322	0.0176286	0.326728	0.0539552	0.956971	1	0.0386138
Aatk	ENSRNOG00000004392	apoptosis-associated tyrosine kinase [Source:RGD Symbol;Acc:1590980]	3186.25	0.0676081	0.201344	0.335785	0.737033	0.912134	0.302818	0.201134	-1.50555	0.132182	0.348456	0.271521	0.201328	-1.34865	0.177451	0.459328	0.0989053	0.201119	0.491775	0.622878	0.919957	0.589286	0.201161	2.92942	0.00339595	0.0156429	0.125491	0.201028	0.624245	0.532467	0.6875	0.563623	0.20113	2.80228	0.00507434	0.0225772	0.258229	0.201338	1.28256	0.199645	0.364512	0.200346	0.201023	0.996634	0.318942	1	0.160978
Abat	ENSRNOG00000002636	4-aminobutyrate aminotransferase [Source:RGD Symbol;Acc:620948]	2170.51	0.0422025	0.199976	0.211037	0.832858	0.951104	-0.407725	0.200257	2.03601	0.0417498	0.171377	-0.501133	0.200491	2.49953	0.0124359	0.0928982	0.13561	0.200771	0.675446	0.499392	0.871256	0.248402	0.200533	1.2387	0.215455	0.39493	0.293922	0.199706	1.47178	0.141081	0.274632	0.0371357	0.20041	0.185298	0.852995	0.923378	0.229751	0.19994	1.1491	0.250516	0.425336	-0.0219692	0.19967	-0.110028	0.912388	1	0.362204
Abca1	ENSRNOG00000018126	ATP-binding cassette, subfamily A (ABC1), member 1 [Source:RGD Symbol;Acc:631344]	65.5756	-0.452014	0.439312	-1.02891	0.30352	0.637073	0.38322	0.439282	-0.872377	0.383003	0.639352	-0.247055	0.439333	0.562342	0.573883	0.820775	0.178261	0.439303	0.405782	0.684903	0.94528	0.00235791	0.439593	0.00536383	0.99572	0.997709	-0.3837	0.4396	-0.87284	0.38275	0.555303	-0.305731	0.439654	-0.695392	0.48681	0.674786	0.0405994	0.439677	0.0923392	0.926429	0.961284	-0.0277146	0.439964	-0.0629929	0.949772	1	0.00283817
Abca13	ENSRNOG00000025645	ATP-binding cassette, subfamily A (ABC1), member 13 [Source:RGD Symbol;Acc:1305895]	4.13183	0	0.210155	0	1	NA	0.195761	0.210482	-0.930059	0.35234	NA	0	0.209912	0	1	1	0.195324	0.210239	0.929056	0.35286	NA	0.145584	0.210824	0.690548	0.48985	NA	-0.163089	0.211232	-0.772085	0.440064	NA	-0.194533	0.210988	-0.92201	0.356523	NA	-0.212281	0.210775	-1.00715	0.313864	NA	-0.0500419	0.21185	-0.236214	0.813267	1	0.112912
Abca17	ENSRNOG00000039656	ATP-binding cassette, subfamily A (ABC1), member 17 [Source:RGD Symbol;Acc:1560494]	17.4052	0.0113957	0.390904	0.0291522	0.976743	0.997855	-0.282487	0.390335	0.723703	0.469248	0.71143	-0.384844	0.389762	0.987382	0.323455	0.628721	0.113753	0.389192	0.292279	0.770073	0.966889	-0.126755	0.390453	-0.324636	0.745456	0.85928	-0.0771373	0.392153	-0.196702	0.844061	0.908711	-0.197915	0.390592	-0.506705	0.612362	0.769626	-0.1778	0.39161	-0.454022	0.649813	0.789097	-0.0892668	0.392858	-0.227224	0.820249	1	0.232869
Abca2	ENSRNOG00000014268	ATP-binding cassette, subfamily A (ABC1), member 2 [Source:RGD Symbol;Acc:620238]	6236.73	0.472181	0.175383	2.69229	0.0070964	0.0995478	-0.409612	0.175347	2.33601	0.0194907	0.104628	-0.065501	0.175628	0.372952	0.709184	0.896803	0.12807	0.175592	0.729362	0.46578	0.857123	-0.254328	0.175327	-1.45059	0.146894	0.30251	0.0123857	0.175015	0.0707693	0.943581	0.968404	-0.230679	0.175338	-1.31562	0.188301	0.361325	-0.467976	0.175303	-2.66952	0.00759587	0.0284886	-0.00818042	0.174935	-0.0467625	0.962702	1	0.142898
Abca4	ENSRNOG00000012892	ATP-binding cassette, subfamily A (ABC1), member 4 [Source:RGD Symbol;Acc:1309445]	15.9254	-0.361131	0.408477	-0.88409	0.376648	0.698845	-0.123565	0.406923	0.303657	0.761389	0.901485	-0.215457	0.408397	0.527566	0.5978	0.835974	-0.269239	0.406843	-0.661777	0.508114	0.875896	-0.564151	0.4085	-1.38103	0.167269	0.331919	-0.53294	0.410335	-1.29879	0.194016	0.346742	-0.21576	0.409905	-0.526366	0.598634	NA	-0.318527	0.410627	-0.775708	0.437921	0.615727	-0.146718	0.412478	-0.355699	0.722066	1	0.0923531
Abca5	ENSRNOG00000004378	ATP-binding cassette, subfamily A (ABC1), member 5 [Source:RGD Symbol;Acc:628661]	72.0108	-0.182639	0.454902	-0.40149	0.688059	0.890355	0.40246	0.454655	-0.885198	0.37605	0.633718	0.842577	0.454196	-1.8551	0.0635825	0.255751	-0.622756	0.453946	-1.37187	0.170104	0.634696	0.0473742	0.454135	0.104317	0.916918	0.959026	-0.725066	0.453902	-1.59741	0.110175	0.22951	0.543586	0.453356	1.19903	0.230518	0.416706	-0.825726	0.45392	-1.8191	0.0688962	0.166834	-0.283299	0.452907	-0.625513	0.531634	1	0.36998
Abca7	ENSRNOG00000012939	ATP-binding cassette, subfamily A (ABC1), member 7 [Source:RGD Symbol;Acc:1303134]	229.984	-0.88431	0.336237	-2.63002	0.00853795	0.111141	0.511616	0.337015	-1.51808	0.128993	0.342941	0.00237568	0.334623	-0.00709958	0.994335	1	-0.37507	0.335405	-1.11826	0.263457	0.718879	0.444053	0.336255	1.32058	0.18664	0.358712	0.0665043	0.33679	0.197465	0.843464	0.908711	0.741244	0.33479	2.21406	0.0268247	0.0866575	0.779614	0.335152	2.32616	0.0200103	0.0628181	-0.1712	0.335707	-0.509969	0.610073	1	-0.134067
Abca8a	ENSRNOG00000004147	ATP-binding cassette, subfamily A (ABC1), member 8a [Source:RGD Symbol;Acc:1307333]	352.104	-0.374358	0.277167	-1.35066	0.176805	0.508905	0.715108	0.276186	-2.58922	0.00961924	0.0642726	0.265827	0.275884	-0.963545	0.335274	0.639811	0.0749228	0.274898	0.272547	0.785201	0.970933	0.494141	0.274942	1.79726	0.0722946	0.17941	-0.108452	0.27603	-0.392901	0.694393	0.81165	0.985017	0.276084	3.56782	0.00035997	0.0023391	0.461721	0.276434	1.67028	0.0948646	0.21221	0.195815	0.275294	0.711296	0.476901	1	-0.112514
Abcb10	ENSRNOG00000017993	ATP-binding cassette, subfamily B (MDR/TAP), member 10 [Source:RGD Symbol;Acc:1311222]	692.715	-0.0647866	0.275169	-0.235443	0.813865	0.945533	0.259848	0.274769	-0.945697	0.344303	0.606231	0.673566	0.274369	-2.45496	0.0140899	0.100051	-0.478505	0.273967	-1.74658	0.0807109	0.50329	-0.106461	0.273934	-0.388638	0.697544	0.829409	-0.565817	0.273515	-2.06868	0.0385758	0.102601	0.260843	0.272825	0.95608	0.339032	0.534798	-0.473324	0.274046	-1.72717	0.0841379	0.194387	0.0277066	0.272385	0.101719	0.91898	1	0.199508
Abcb11	ENSRNOG00000050860	ATP-binding cassette, subfamily B (MDR/TAP), member 11 [Source:RGD Symbol;Acc:619930]	1.4408	0	0.101505	0	1	NA	0	0.101514	0	1	NA	0	0.10143	0	1	NA	0	0.101439	0	1	NA	0	0.101601	0	1	NA	-0.0456005	0.1018	-0.44794	0.654196	NA	0	0.1017	0	1	NA	-0.132878	0.101671	-1.30694	0.191233	NA	-0.0873831	0.101966	-0.856982	0.391455	1	0.0456639
Abcb1a	NA	NA	57.1412	-0.358443	0.455881	-0.786266	0.431712	0.73713	0.849831	0.456136	-1.86311	0.0624471	0.220874	0.230074	0.456103	-0.504434	0.613956	0.843879	0.261314	0.456359	0.572607	0.566911	0.899315	0.505333	0.456426	1.10715	0.268228	0.45592	-0.640386	0.456298	-1.40344	0.160486	0.301688	0.561944	0.456277	1.23158	0.218104	0.400972	-0.0620378	0.45624	-0.135976	0.89184	0.942982	0.219905	0.456656	0.481555	0.630122	1	0.295887
Abcb1b	NA	NA	12.1162	-0.494486	0.403896	-1.22429	0.220842	NA	-0.436552	0.400826	1.08913	0.276096	0.535373	0.00527799	0.404703	-0.0130416	0.989595	1	-0.936316	0.401638	-2.33125	0.0197404	0.289714	-0.727454	0.402038	-1.80942	0.0703863	NA	-0.00976128	0.404365	-0.0241398	0.980741	0.989004	0.747121	0.404487	1.84708	0.0647351	NA	0.904351	0.403689	2.24021	0.025077	0.0758277	0.419626	0.404159	1.03827	0.299145	1	-0.281141
Abcb4	ENSRNOG00000008012	ATP-binding cassette, subfamily B (MDR/TAP), member 4 [Source:RGD Symbol;Acc:620248]	84.908	0.697965	0.419151	1.66519	0.0958758	0.382899	-0.447285	0.418285	1.06933	0.284921	0.544553	0.63841	0.419619	-1.5214	0.128158	0.384829	-0.38773	0.418754	-0.925913	0.354491	0.787583	-0.00870075	0.418707	-0.02078	0.983421	0.990661	0.774968	0.417352	1.85687	0.06333	0.150934	0.232872	0.416871	0.55862	0.576421	0.743649	-0.0742544	0.419739	-0.176906	0.859582	0.923078	-0.151258	0.417945	-0.361908	0.717421	1	-0.336384
Abcb6	ENSRNOG00000018697	ATP-binding cassette, subfamily B (MDR/TAP), member 6 [Source:RGD Symbol;Acc:71077]	649.838	-0.0759911	0.295792	-0.256907	0.797251	0.938111	-0.268001	0.296357	0.904319	0.365826	0.624648	-0.428874	0.296617	1.44589	0.148209	0.417744	0.0848821	0.29718	0.285626	0.775165	0.968698	-0.185111	0.296175	-0.625007	0.531967	0.704976	-0.387512	0.294669	-1.31508	0.188484	0.339812	-0.317771	0.295915	-1.07386	0.282885	0.475861	-0.379223	0.294989	-1.28555	0.198601	0.363581	-0.0677023	0.293862	-0.230388	0.81779	1	0.470402
Abcb7	ENSRNOG00000002790	ATP-binding cassette, subfamily B (MDR/TAP), member 7 [Source:RGD Symbol;Acc:1303086]	42.1582	-0.991506	0.459506	-2.15776	0.0309462	0.223322	0.0492307	0.460086	-0.107003	0.914786	0.971133	-1.07182	0.459676	2.33169	0.019717	0.1236	0.129548	0.46025	0.281473	0.778348	0.969304	-0.879567	0.459432	-1.91447	0.0555607	0.147478	-0.92667	0.459198	-2.01802	0.0435894	0.113012	-0.391487	0.45969	-0.851633	0.394418	0.590246	-0.171305	0.458687	-0.373468	0.7088	0.82949	-0.236141	0.458369	-0.515177	0.60643	1	-0.0021282
Abcb8	ENSRNOG00000008557	ATP-binding cassette, subfamily B (MDR/TAP), member 8 [Source:RGD Symbol;Acc:1307655]	686.482	0.50085	0.325886	1.53689	0.12432	0.431576	-0.123541	0.325295	0.379783	0.704107	0.869631	-0.0764045	0.326837	0.233769	0.815164	0.94397	0.453714	0.326248	1.3907	0.164317	0.628317	-0.557303	0.324773	-1.71597	0.0861668	0.205127	-0.290681	0.324291	-0.896359	0.370061	0.543044	-0.925995	0.325233	-2.84717	0.00441098	0.0199966	-1.04992	0.325237	-3.22818	0.0012458	0.00611638	-0.258391	0.323638	-0.798395	0.424641	1	-0.14308
Abcb9	ENSRNOG00000001082	ATP-binding cassette, subfamily B (MDR/TAP), member 9 [Source:RGD Symbol;Acc:620254]	905.456	-0.189175	0.253718	-0.745612	0.455902	0.75608	0.149662	0.253749	-0.589803	0.555323	0.775105	-0.262463	0.254067	1.03305	0.301582	0.60396	0.22295	0.254098	0.877416	0.380261	0.80753	-0.354066	0.252994	-1.3995	0.161663	0.323674	-0.0858672	0.253026	-0.339362	0.734337	0.840879	-0.53614	0.253083	-2.11844	0.0341381	0.104286	0.00654356	0.253144	0.0258491	0.979378	0.988762	-0.0967641	0.25245	-0.3833	0.701498	1	-0.41786
Abcc1	ENSRNOG00000022305	ATP-binding cassette, subfamily C (CFTR/MRP), member 1 [Source:RGD Symbol;Acc:3112]	335.09	-0.0855466	0.316342	-0.270424	0.786834	0.932485	-0.284049	0.317158	0.895608	0.370462	0.628091	-0.314137	0.317149	0.990501	0.321929	0.62705	-0.0554592	0.317963	-0.17442	0.861535	0.984821	0.153182	0.31755	0.482388	0.62953	0.780737	0.0394621	0.315374	0.125128	0.900422	0.943353	0.1072	0.316704	0.338487	0.734996	0.855277	0.354547	0.316225	1.12119	0.262208	0.438245	0.229539	0.315256	0.728102	0.466551	1	0.39777
Abcc10	ENSRNOG00000018863	ATP-binding cassette, subfamily C (CFTR/MRP), member 10 [Source:RGD Symbol;Acc:1306696]	121.482	0.971459	0.446095	2.17769	0.0294288	0.217795	0.276445	0.444111	-0.622468	0.533634	0.759094	1.78743	0.445545	-4.01178	6.02636e-05	0.00193124	-0.539524	0.443552	-1.21637	0.223844	0.680193	0.0706649	0.44371	0.159259	0.873465	0.936187	-0.703303	0.443262	-1.58665	0.112591	0.232967	0.35905	0.442864	0.810746	0.417512	0.611417	-1.48349	0.445412	-3.33061	0.000866568	0.00449813	0.191269	0.442564	0.432184	0.665607	1	0.497523
Abcc12	ENSRNOG00000015666	ATP-binding cassette, subfamily C (CFTR/MRP), member 12 [Source:RGD Symbol;Acc:735100]	6.16136	0	0.278692	0	1	NA	0.62054	0.280172	-2.21485	0.0267704	0.129639	0.199387	0.278759	-0.715264	0.474446	0.753919	0.418759	0.28024	1.49429	0.135101	NA	0.4579	0.280972	1.6297	0.103165	NA	-0.120011	0.280479	-0.42788	0.668739	NA	-0.0874867	0.280765	-0.311602	0.755343	NA	0	0.27939	0	1	NA	0.122087	0.281175	0.434202	0.664142	1	-0.0426286
Abcc2	ENSRNOG00000046727	ATP-binding cassette, subfamily C (CFTR/MRP), member 2 [Source:RGD Symbol;Acc:2366]	63.7922	-0.405961	0.46035	-0.881851	0.377857	0.699317	-0.460411	0.460153	1.00056	0.317039	0.579534	-0.90628	0.460196	1.96933	0.0489147	0.219467	0.0399081	0.459996	0.0867574	0.930864	0.996441	-0.217035	0.46015	-0.47166	0.637169	0.786162	0.145768	0.46037	0.316632	0.751523	0.851962	-0.667171	0.46025	-1.44958	0.147175	0.305553	0.524537	0.460383	1.13935	0.254558	0.430242	-0.0271912	0.460403	-0.0590596	0.952905	1	0.0976084
Abcc3	ENSRNOG00000002948	ATP-binding cassette, subfamily C (CFTR/MRP), member 3 [Source:RGD Symbol;Acc:71101]	15.7152	-0.0711056	0.413118	-0.172119	0.863344	0.963976	0.460197	0.414116	-1.11128	0.26645	0.525361	0.339779	0.413641	-0.821435	0.411399	0.707944	0.0493123	0.414638	0.118928	0.905332	0.993221	0.143716	0.415197	0.346138	0.729239	0.848629	-0.274203	0.415	-0.660728	0.508786	0.667955	0.295038	0.415207	0.710581	0.477344	NA	-0.193912	0.414293	-0.468055	0.639746	0.781334	0.00918519	0.416172	0.0220707	0.982392	1	-0.0422787
Abcc4	ENSRNOG00000010064	ATP-binding cassette, subfamily C (CFTR/MRP), member 4 [Source:RGD Symbol;Acc:620266]	90.7622	-0.534456	0.43217	-1.23668	0.216205	0.553782	-0.969235	0.435801	2.22403	0.0261462	0.127448	-0.806499	0.433066	1.8623	0.0625606	0.253724	-0.697193	0.436678	-1.59658	0.110359	0.562658	-1.01927	0.435359	-2.34122	0.0192208	0.064495	-0.577134	0.431265	-1.33824	0.180819	0.32919	-0.371979	0.432748	-0.859574	0.390024	0.585459	0.0207348	0.431005	0.048108	0.96163	0.98042	0.0634128	0.430094	0.147439	0.882785	1	0.527098
Abcc5	ENSRNOG00000029178	ATP-binding cassette, subfamily C (CFTR/MRP), member 5 [Source:RGD Symbol;Acc:70913]	1042.66	-0.0462842	0.22144	-0.209015	0.834437	0.951914	0.655775	0.220405	-2.97532	0.00292687	0.027513	0.139955	0.221416	-0.632089	0.527329	0.790044	0.469536	0.220381	2.13056	0.0331253	0.353872	0.204429	0.219486	0.931402	0.351646	0.543596	-0.43074	0.219895	-1.95885	0.0501309	0.125928	-0.253667	0.219895	-1.15358	0.248672	0.438514	-0.449412	0.220372	-2.03934	0.0414162	0.112885	-0.0649565	0.218819	-0.296851	0.766581	1	-0.0206054
Abcc6	ENSRNOG00000028781	ATP-binding cassette, subfamily C (CFTR/MRP), member 6 [Source:RGD Symbol;Acc:620268]	28.8048	-0.139572	0.37434	-0.372847	0.709262	0.900383	-0.160184	0.373968	0.428336	0.668406	0.8485	-0.433856	0.373759	1.16079	0.245726	0.543946	0.134101	0.373386	0.359147	0.719485	0.953772	-0.158013	0.374191	-0.42228	0.672821	0.812011	-0.315783	0.375124	-0.84181	0.399894	0.570458	-0.197414	0.374197	-0.527567	0.5978	0.758624	-0.0222955	0.374789	-0.0594882	0.952563	0.975278	0.153916	0.375573	0.409817	0.68194	1	0.317954
Abcc8	ENSRNOG00000021130	ATP-binding cassette, subfamily C (CFTR/MRP), member 8 [Source:RGD Symbol;Acc:3786]	261.37	0.706973	0.394342	1.79279	0.0730061	0.333399	-0.866022	0.394589	2.19475	0.0281819	0.133191	0.497508	0.394706	-1.26045	0.207507	0.499263	-0.656557	0.394953	-1.66237	0.0964392	0.537965	-0.357481	0.394847	-0.905367	0.365271	0.556175	0.835738	0.393559	2.12354	0.033709	0.0922042	0.0767627	0.393424	0.195115	0.845303	0.919709	-0.459633	0.394268	-1.16579	0.2437	0.418256	-0.588398	0.393486	-1.49535	0.134824	1	-0.327196
Abcc9	ENSRNOG00000036960	ATP-binding cassette, subfamily C (CFTR/MRP), member 9 [Source:RGD Symbol;Acc:3787]	28.8075	-0.156711	0.414537	-0.378038	0.705403	0.898905	0.289445	0.414751	-0.697876	0.485255	0.722763	0.0293476	0.414556	-0.0707927	0.943563	0.994949	0.103387	0.41477	0.249263	0.803158	0.973199	0.246597	0.415083	0.59409	0.552452	0.720779	-0.223954	0.415421	-0.5391	0.589818	0.732548	-0.323888	0.415646	-0.77924	0.435838	0.629783	0.0869822	0.415013	0.209589	0.833988	0.906615	0.154225	0.415896	0.370826	0.710767	1	0.181105
Abcd1	ENSRNOG00000056524	ATP-binding cassette, subfamily D (ALD), member 1 [Source:RGD Symbol;Acc:1562128]	207.748	0.980609	0.374727	2.61686	0.00887427	0.113797	0.157986	0.370662	-0.426227	0.669942	0.849254	1.45979	0.374133	-3.90179	9.54846e-05	0.00278698	-0.321192	0.370059	-0.867949	0.385422	0.812037	-0.343771	0.369403	-0.930611	0.352055	0.543822	-0.187849	0.369319	-0.508636	0.611007	0.748534	0.14991	0.368556	0.406751	0.684191	0.822274	-1.70805	0.373093	-4.57809	4.69239e-06	4.27237e-05	-0.539595	0.36765	-1.46768	0.14219	1	-0.313908
Abcd2	ENSRNOG00000015538	ATP-binding cassette, subfamily D (ALD), member 2 [Source:RGD Symbol;Acc:69244]	791.675	0.598337	0.271728	2.20197	0.0276672	0.210316	0.198118	0.270493	-0.732433	0.463904	0.707524	0.608907	0.271907	-2.23939	0.0251305	0.145515	0.187548	0.270673	0.692896	0.488375	0.865867	0.0755096	0.270161	0.279498	0.779863	0.881886	0.23868	0.270245	0.883197	0.37713	0.549883	0.181307	0.270393	0.670532	0.502519	0.686986	-0.120737	0.271883	-0.444079	0.656985	0.793661	0.23892	0.270401	0.883575	0.376926	1	-0.361288
Abcd3	ENSRNOG00000011929	ATP-binding cassette, subfamily D (ALD), member 3 [Source:RGD Symbol;Acc:2007]	932.951	-0.241263	0.23989	-1.00572	0.314548	0.645795	-0.105252	0.240196	0.438193	0.661247	0.844893	-0.0364129	0.239864	0.151806	0.87934	0.973347	-0.310103	0.24017	-1.29118	0.196642	0.656567	1.69472	0.242404	6.99127	2.72404e-12	7.64572e-11	1.46477	0.241106	6.07521	1.23827e-09	1.99288e-08	1.79523	0.24136	7.43798	1.02233e-13	3.53455e-12	1.96613	0.241707	8.13436	4.1411e-16	1.41026e-14	0.260096	0.242913	1.07074	0.284288	1	0.335197
Abcd4	ENSRNOG00000011964	ATP-binding cassette, subfamily D (ALD), member 4 [Source:RGD Symbol;Acc:1307273]	89.7823	0.557726	0.457414	1.2193	0.222729	0.560594	0.0421432	0.457051	-0.0922068	0.926534	0.97646	0.639799	0.457453	-1.39861	0.16193	0.439492	-0.0399293	0.457091	-0.0873554	0.930389	0.996441	-0.28169	0.456847	-0.616595	0.537502	0.709094	-0.242091	0.456708	-0.530078	0.596058	0.737179	-0.0578298	0.45679	-0.1266	0.899257	0.948697	-0.735391	0.457224	-1.60838	0.107751	0.233764	0.0644257	0.456515	0.141125	0.887771	1	-0.0817423
Abce1	ENSRNOG00000018345	ATP-binding cassette, subfamily E (OABP), member 1 [Source:RGD Symbol;Acc:1305301]	1289.33	-0.785291	0.196658	-3.99317	6.51954e-05	0.0059471	0.809912	0.196595	-4.1197	3.79366e-05	0.00102653	-0.31958	0.196099	1.62969	0.103168	0.340358	0.344202	0.196036	1.75581	0.0791206	0.499897	-0.277391	0.194765	-1.42423	0.15438	0.31326	-0.881603	0.195729	-4.5042	6.66249e-06	5.49032e-05	-0.523273	0.195103	-2.68203	0.00731771	0.0305793	-0.218198	0.194808	-1.12006	0.262686	0.438748	-0.121886	0.19387	-0.628698	0.529547	1	-0.2057
Abcf1	ENSRNOG00000000799	ATP-binding cassette, subfamily F (GCN20), member 1 [Source:RGD Symbol;Acc:620286]	4099.61	0.265283	0.18033	1.4711	0.141265	0.460044	-0.174187	0.180294	0.966128	0.33398	0.595752	0.0766994	0.180423	-0.425108	0.670758	0.879147	0.0143961	0.180387	0.0798066	0.936391	0.996876	1.58516	0.180915	8.76191	1.91972e-18	1.13869e-16	1.83321	0.180743	10.1427	3.5726e-24	3.52344e-22	1.58746	0.180822	8.77915	1.64719e-18	1.0757e-16	1.84203	0.181122	10.1701	2.69598e-24	2.03902e-22	0.274097	0.181533	1.5099	0.131069	1	-0.0738668
Abcf2	ENSRNOG00000010609	ATP-binding cassette, subfamily F (GCN20), member 2 [Source:RGD Symbol;Acc:1304942]	1623.08	-0.119341	0.153544	-0.777245	0.437014	0.74233	-0.118471	0.153955	0.769516	0.441587	0.691984	-0.0616685	0.153724	0.401164	0.688299	0.887353	-0.176144	0.154135	-1.14279	0.253125	0.712433	-0.256792	0.153467	-1.67327	0.0942735	0.218895	-0.289568	0.152416	-1.89985	0.0574529	0.140112	-0.220796	0.152641	-1.4465	0.148037	0.306693	-0.184221	0.152761	-1.20594	0.227839	0.398921	-0.0139944	0.151627	-0.0922952	0.926463	1	0.151247
Abcf3	ENSRNOG00000001710	ATP-binding cassette, subfamily F (GCN20), member 3 [Source:RGD Symbol;Acc:1310468]	1344.45	0.241458	0.22584	1.06916	0.285	0.621569	-0.0891112	0.225579	0.395033	0.692819	0.863196	0.0428807	0.226305	-0.189481	0.849715	0.960584	0.109466	0.226045	0.484266	0.628197	0.923604	-0.516051	0.224994	-2.29362	0.0218125	0.0709466	-0.510499	0.224349	-2.27547	0.022878	0.0675383	-0.632084	0.224888	-2.81067	0.00494389	0.0220719	-0.525337	0.22528	-2.33193	0.0197046	0.0619688	0.226619	0.223786	1.01266	0.311221	1	0.0835592
Abcg1	ENSRNOG00000001158	ATP-binding cassette, subfamily G (WHITE), member 1 [Source:RGD Symbol;Acc:620294]	1072.07	0.0429472	0.192643	0.222936	0.823585	0.947261	0.300652	0.191763	-1.56783	0.116921	0.323506	0.45819	0.192164	-2.38437	0.0171082	0.113865	-0.114591	0.191282	-0.599069	0.549127	0.89206	-0.444702	0.190229	-2.33772	0.0194017	0.0649474	-0.605819	0.190223	-3.18478	0.00144864	0.00658998	-0.129863	0.189846	-0.684045	0.493947	0.679742	-0.702116	0.191092	-3.67423	0.000238567	0.00145958	-0.0533492	0.188651	-0.282793	0.777336	1	-0.139535
Abcg2	ENSRNOG00000007041	ATP-binding cassette, subfamily G (WHITE), member 2 [Source:RGD Symbol;Acc:631345]	83.2072	0.889108	0.449427	1.97832	0.0478931	0.276718	-0.435013	0.449006	0.968837	0.332626	0.594514	-0.164928	0.450316	0.366248	0.71418	0.898688	0.619023	0.449899	1.37592	0.168848	0.633118	0.361502	0.449337	0.804522	0.421095	0.609571	0.963548	0.448899	2.14647	0.0318356	0.0880445	0.0846565	0.44995	0.188147	0.850762	0.922149	0.134788	0.449843	0.299635	0.764456	0.865651	0.0603491	0.449317	0.134313	0.893155	1	-0.167033
Abcg3	NA	NA	5.99313	0.200952	0.38747	0.518626	0.604022	NA	-0.372426	0.386623	0.963279	0.335407	0.5972	-0.433964	0.383489	1.13162	0.257794	0.558021	0.26249	0.382638	0.686	0.492713	NA	-0.153173	0.386654	-0.39615	0.691994	NA	0.391631	0.38971	1.00493	0.314931	NA	-0.383551	0.386137	-0.993303	0.320563	NA	0.279866	0.386898	0.723358	0.46946	NA	0.0891864	0.389141	0.229188	0.818723	1	-0.172378
Abcg3l1	ENSRNOG00000030216	ATP-binding cassette, subfamily G (WHITE), member 3-like 1 [Source:RGD Symbol;Acc:1303294]	12.4053	-0.0339611	0.360028	-0.0943291	0.924848	NA	0.311611	0.360768	-0.863745	0.387728	0.642732	0.261607	0.360299	-0.726081	0.467789	0.750056	0.0160437	0.361039	0.0444376	0.964556	0.999581	-0.068335	0.361913	-0.188816	0.850237	NA	-0.218027	0.36186	-0.602518	0.546829	0.700297	-0.00708819	0.362208	-0.0195694	0.984387	NA	-0.364755	0.361361	-1.00939	0.312787	0.493289	-0.180689	0.36319	-0.497506	0.618833	1	-0.161919
Abcg3l2	NA	NA	0.396828	0	0.0998606	0	1	NA	0.0379505	0.0998606	-0.380035	0.70392	NA	0	0.0998606	0	1	NA	0.0357954	0.0998606	0.358454	0.720004	NA	-0.027959	0.0998606	-0.27998	0.779493	NA	-0.0442303	0.0999598	-0.44248	0.658142	NA	-0.0111396	0.0998982	-0.111509	0.911212	NA	-0.00864864	0.0999231	-0.0865529	0.931027	NA	0.0316897	0.100022	0.316826	0.751376	1	-0.0216792
Abcg3l3	ENSRNOG00000039890	ATP-binding cassette, subfamily G (WHITE), member 3-like 3 [Source:RGD Symbol;Acc:1564709]	24.0144	0.635893	0.45805	1.38826	0.165057	0.49341	-0.617022	0.458107	1.34689	0.178015	0.419278	0.300241	0.457621	-0.656091	0.511766	0.780689	-0.281369	0.457679	-0.614775	0.538704	0.886275	-0.472076	0.45816	-1.03037	0.302834	0.492628	0.112738	0.459202	0.245509	0.806062	0.886769	-0.143846	0.458722	-0.31358	0.75384	0.865623	-0.624392	0.458235	-1.3626	0.173008	0.329549	-0.101237	0.459381	-0.220376	0.825578	1	0.0322075
Abcg3l4	NA	NA	1.38525	-0.0427862	0.212413	-0.20143	0.840363	NA	0.0434653	0.212496	-0.204547	0.837926	NA	0.0358793	0.212023	-0.169223	0.865621	NA	-0.0352002	0.212107	-0.165955	0.868192	NA	-0.122162	0.213897	-0.571128	0.567913	NA	-0.148029	0.215385	-0.687275	0.49191	NA	0.0251616	0.214606	0.117245	0.906666	NA	-0.0138943	0.213813	-0.0649836	0.948187	NA	0.0913482	0.216776	0.421395	0.673467	1	-0.0175988
Abcg4	ENSRNOG00000008862	ATP-binding cassette, subfamily G (WHITE), member 4 [Source:RGD Symbol;Acc:1305840]	783.54	-0.208528	0.252323	-0.826434	0.408558	0.719855	0.0987721	0.252488	-0.391195	0.695653	0.864513	-0.213365	0.252626	0.844589	0.39834	0.696434	0.103608	0.25279	0.409859	0.681909	0.944683	0.159758	0.252233	0.633373	0.52649	0.700648	-0.477561	0.2511	-1.90188	0.0571871	0.139646	-0.14053	0.25179	-0.558121	0.576762	0.743698	-0.301684	0.251286	-1.20056	0.229923	0.401542	-0.0326508	0.250057	-0.130573	0.896113	1	0.538547
Abcg5	ENSRNOG00000005250	ATP-binding cassette, subfamily G (WHITE), member 5 [Source:RGD Symbol;Acc:620298]	12.6415	0.894423	0.357431	2.50236	0.0123367	0.13544	-0.89473	0.357486	2.50284	0.01232	0.0757393	0.519799	0.356478	-1.45815	0.144799	0.412374	-0.520106	0.356533	-1.45879	0.144623	0.607565	-0.040648	0.356365	-0.114063	0.909188	0.955032	0.730819	0.359524	2.03274	0.0420789	0.109834	0.300147	0.358615	0.836963	0.402613	NA	-0.324452	0.357067	-0.908657	0.363531	0.545676	-0.160848	0.359162	-0.447844	0.654266	1	0.123263
Abcg8	ENSRNOG00000005420	ATP-binding cassette, subfamily G (WHITE), member 8 [Source:RGD Symbol;Acc:620300]	3.09299	0.0685877	0.102257	0.670738	0.502387	NA	0.00896277	0.102279	-0.087631	0.93017	NA	0	0.10221	0	1	NA	0.0775743	0.102232	0.758808	0.447968	NA	0.0776284	0.102306	0.758787	0.44798	NA	0.0453396	0.102389	0.442818	0.657898	NA	-0.0150514	0.102336	-0.147078	0.88307	NA	-0.00795741	0.102302	-0.0777833	0.938	NA	0.0152907	0.102434	0.149274	0.881337	1	0.023326
Abhd1	ENSRNOG00000025689	abhydrolase domain containing 1 [Source:RGD Symbol;Acc:1310988]	363.199	-0.089417	0.298155	-0.299901	0.764253	0.923549	0.439101	0.297082	-1.47805	0.139395	0.360713	-0.387981	0.299711	1.29452	0.195487	0.48481	0.737665	0.298645	2.47004	0.0135098	0.239985	-0.235579	0.29516	-0.798142	0.424788	0.61278	-0.60683	0.295421	-2.05412	0.0399645	0.105342	-0.913844	0.297032	-3.07658	0.00209388	0.0106644	-0.526264	0.296166	-1.77692	0.0755809	0.17953	-0.00885134	0.293411	-0.030167	0.975934	1	-0.0678503
Abhd11	ENSRNOG00000018910	abhydrolase domain containing 11 [Source:RGD Symbol;Acc:1304681]	659.505	0.185169	0.271767	0.681351	0.495649	0.785475	-0.149092	0.271655	0.548829	0.583123	0.79532	0.345469	0.271784	-1.27111	0.203689	0.495064	-0.309392	0.271672	-1.13884	0.254769	0.713818	-0.281936	0.271171	-1.0397	0.298479	0.488712	-0.0302727	0.270327	-0.111986	0.910835	0.949469	-0.0215651	0.270214	-0.0798076	0.93639	0.968864	-0.233828	0.271255	-0.862025	0.388674	0.569002	-0.0183871	0.269811	-0.068148	0.945668	1	-0.102572
Abhd12	ENSRNOG00000036934	abhydrolase domain containing 12 [Source:RGD Symbol;Acc:1562570]	4457.16	-0.0462794	0.148631	-0.311371	0.755519	0.919479	0.0385866	0.148624	-0.259625	0.795153	0.920065	-0.151464	0.148813	1.01781	0.308766	0.611392	0.143771	0.148806	0.966166	0.333961	0.774209	-0.419922	0.148297	-2.83162	0.00463131	0.020107	-0.357206	0.148111	-2.41175	0.0158763	0.0504831	-0.452286	0.148309	-3.04962	0.0022913	0.0114858	-0.304667	0.148304	-2.05434	0.0399432	0.109695	0.00625926	0.147783	0.0423544	0.966216	1	-0.101303
Abhd13	ENSRNOG00000014598	abhydrolase domain containing 13 [Source:RGD Symbol;Acc:1308317]	551.405	-0.798017	0.303609	-2.62844	0.00857787	0.11142	0.578964	0.303919	-1.90499	0.0567808	0.208209	-0.194181	0.302864	0.64115	0.521425	0.786848	-0.0248716	0.303175	-0.0820372	0.934617	0.996876	-0.167481	0.302499	-0.553656	0.579814	0.741455	-0.553819	0.303057	-1.82744	0.0676333	0.158937	-0.140046	0.302152	-0.463496	0.643009	0.792884	0.0284793	0.302058	0.0942841	0.924884	0.960507	-0.215719	0.301503	-0.715479	0.474313	1	-0.192626
Abhd14a	ENSRNOG00000011936	abhydrolase domain containing 14A [Source:RGD Symbol;Acc:1309721]	499.503	-0.082632	0.291443	-0.283527	0.776773	0.928693	0.19075	0.291153	-0.655151	0.51237	0.742937	0.0284929	0.29157	-0.0977223	0.922153	0.988656	0.0796246	0.291281	0.27336	0.784576	0.970933	-0.332871	0.289944	-1.14805	0.250946	0.437836	-0.54749	0.289513	-1.89107	0.0586152	0.14233	-0.276069	0.28987	-0.952389	0.3409	0.536718	-0.27001	0.290314	-0.930062	0.352339	0.534799	0.194848	0.288375	0.675674	0.499247	1	0.0238686
Abhd14b	ENSRNOG00000012073	abhydrolase domain containing 14b [Source:RGD Symbol;Acc:1359649]	635.027	0.150726	0.256627	0.587333	0.55698	0.821711	-0.953956	0.25854	3.68979	0.000224442	0.00398219	-0.120113	0.25732	0.466786	0.640653	0.860008	-0.683117	0.259226	-2.63522	0.00840839	0.190864	-0.231246	0.259319	-0.891743	0.372531	0.563277	0.185532	0.255649	0.725729	0.468005	0.632628	0.269233	0.25687	1.04813	0.294579	0.489053	0.0266506	0.256424	0.103932	0.917223	0.955972	-0.00815571	0.255445	-0.0319274	0.97453	1	0.537177
Abhd15	ENSRNOG00000015002	abhydrolase domain containing 15 [Source:RGD Symbol;Acc:1304598]	19.2228	-0.177036	0.384746	-0.460137	0.645418	0.870684	0.484329	0.385483	-1.25642	0.208963	0.457731	-0.173798	0.384335	0.452206	0.65112	0.866347	0.481092	0.385072	1.24935	0.211536	0.669727	-0.590364	0.387479	-1.5236	0.127608	0.273549	-0.599116	0.386727	-1.5492	0.121335	0.246957	-0.96541	0.386678	-2.49668	0.0125362	0.0472016	-0.428975	0.386353	-1.11032	0.266862	0.443656	-0.00689436	0.38833	-0.0177538	0.985835	1	-0.475577
Abhd16a	ENSRNOG00000056637	abhydrolase domain containing 16A [Source:RGD Symbol;Acc:1303164]	1976.79	-0.125877	0.169937	-0.740731	0.458857	0.758692	0.175464	0.169801	-1.03335	0.30144	0.563197	0.258294	0.169579	-1.52315	0.12772	0.384083	-0.208708	0.169442	-1.23173	0.218048	0.673078	-1.12006	0.168077	-6.66395	2.66556e-11	6.44601e-10	-1.14061	0.167843	-6.7957	1.07788e-11	2.24083e-10	-0.896085	0.167414	-5.35251	8.67447e-08	1.2762e-06	-1.01918	0.168242	-6.05782	1.37976e-09	2.28317e-08	-0.00444711	0.166127	-0.0267694	0.978644	1	-0.154912
Abhd16b	ENSRNOG00000015067	abhydrolase domain containing 16B [Source:RGD Symbol;Acc:1309726]	0.652574	-0.0190345	0.100095	-0.190164	0.849181	NA	-0.0154889	0.100088	0.154752	0.877017	NA	-0.0354002	0.0999249	0.354268	0.723138	NA	0	0.099918	0	1	NA	0	0.100257	0	1	NA	0.0166796	0.100584	0.165827	0.868293	NA	-0.0897241	0.100452	-0.893206	0.371747	NA	0.0356975	0.100341	0.355762	0.722019	NA	0	0.10083	0	1	1	0
Abhd17a	ENSRNOG00000018212	abhydrolase domain containing 17A [Source:RGD Symbol;Acc:1359682]	5082.18	0.205157	0.140128	1.46407	0.143176	0.463186	0.208718	0.139891	-1.492	0.135698	0.354417	0.364424	0.140134	-2.60055	0.00930748	0.0766338	0.049451	0.139897	0.353483	0.723727	0.954158	0.427149	0.139886	3.05354	0.00226159	0.0110879	0.39162	0.139858	2.80012	0.00510832	0.0194609	0.422997	0.139823	3.02524	0.00248435	0.0122712	0.181388	0.14015	1.29424	0.195582	0.359871	-0.00507492	0.13988	-0.0362805	0.971059	1	-0.17319
Abhd17b	ENSRNOG00000012514	abhydrolase domain containing 17B [Source:RGD Symbol;Acc:1305246]	1283.75	-0.11896	0.201925	-0.589128	0.555775	0.821519	0.214741	0.201708	-1.06461	0.287052	0.546425	0.264901	0.201583	-1.3141	0.188812	0.475383	-0.16912	0.201366	-0.839864	0.400985	0.820744	-0.552981	0.200451	-2.75868	0.00580345	0.0241797	-0.836256	0.200121	-4.17875	2.9312e-05	0.000210951	-0.372084	0.199867	-1.86166	0.0626509	0.164498	-0.711902	0.200527	-3.55016	0.000385004	0.0022231	0.0053945	0.19871	0.0271477	0.978342	1	0.0685349
Abhd17c	ENSRNOG00000012683	abhydrolase domain containing 17C [Source:RGD Symbol;Acc:1308210]	877.045	0.435148	0.270833	1.6067	0.10812	0.406562	-0.160078	0.270361	0.59209	0.55379	0.773823	0.280547	0.271221	-1.03439	0.300956	0.60308	-0.005477	0.270749	-0.020229	0.983861	1	-0.0330412	0.270256	-0.122259	0.902694	0.951698	-0.169356	0.269301	-0.628872	0.529433	0.684658	0.0183487	0.270007	0.0679565	0.94582	0.97393	-0.695988	0.270311	-2.57477	0.0100308	0.035676	-0.0914847	0.268776	-0.340375	0.733574	1	0.296393
Abhd2	ENSRNOG00000017120	abhydrolase domain containing 2 [Source:RGD Symbol;Acc:1311389]	136.85	0.26825	0.438005	0.612437	0.540248	0.812815	0.10926	0.437291	-0.249857	0.802698	0.922885	1.25083	0.437101	-2.86165	0.00421447	0.0449717	-0.873317	0.436383	-2.00126	0.0453642	0.399464	-0.792265	0.436136	-1.81656	0.069285	0.173635	-0.669641	0.435906	-1.5362	0.124488	0.251548	-0.0476639	0.434772	-0.10963	0.912703	0.956358	-1.13977	0.436801	-2.60936	0.00907126	0.0329221	-0.201879	0.434688	-0.464422	0.642345	1	-0.231884
Abhd3	ENSRNOG00000029370	abhydrolase domain containing 3 [Source:RGD Symbol;Acc:1310655]	1721.42	-0.320582	0.263848	-1.21502	0.224357	0.561956	-0.307032	0.264302	1.16167	0.245369	0.502326	-0.181622	0.263868	0.688308	0.491259	0.766174	-0.445991	0.264321	-1.68731	0.0915444	0.527611	-0.352427	0.264152	-1.33418	0.182143	0.353057	-0.0967295	0.26361	-0.366942	0.713662	0.825641	-0.0591905	0.263601	-0.224546	0.822332	0.90543	-0.0626406	0.263507	-0.237719	0.812099	0.894289	-0.286493	0.263268	-1.08822	0.2765	1	0.0513338
Abhd4	ENSRNOG00000009244	abhydrolase domain containing 4 [Source:RGD Symbol;Acc:1311858]	1479.03	0.337072	0.208572	1.6161	0.106074	0.404992	-0.521263	0.208831	2.4961	0.0125568	0.0765604	-0.354274	0.209672	1.68966	0.0910933	0.315658	0.170083	0.20993	0.810189	0.417831	0.832569	-0.728971	0.208478	-3.49663	0.000471172	0.00285669	-0.28789	0.207296	-1.38879	0.164897	0.308442	-0.805584	0.208536	-3.86305	0.00011198	0.000846514	-0.563415	0.208134	-2.70698	0.00678975	0.0259306	0.061547	0.206855	0.297536	0.766057	1	0.0801824
Abhd5	ENSRNOG00000000221	abhydrolase domain containing 5 [Source:RGD Symbol;Acc:1303237]	73.8949	0.17556	0.460884	0.380919	0.703263	0.898079	-0.995754	0.460724	2.16128	0.0306737	0.139995	-0.225377	0.460832	0.489066	0.624795	0.850351	-0.594817	0.46067	-1.2912	0.196634	0.656567	-1.44406	0.460754	-3.13413	0.00172367	0.00882803	-0.463641	0.460957	-1.00582	0.314501	0.484844	-0.935084	0.460908	-2.02879	0.0424798	0.123449	-0.463738	0.460911	-1.00613	0.314352	0.494428	0.175463	0.460982	0.380629	0.703478	1	0.0153343
Abhd6	ENSRNOG00000008167	abhydrolase domain containing 6 [Source:RGD Symbol;Acc:1359323]	1210.75	-0.758469	0.272912	-2.77917	0.00544974	0.0870485	0.563408	0.273144	-2.06268	0.039143	0.16356	-0.0877874	0.272209	0.3225	0.747074	0.915195	-0.107273	0.272441	-0.393749	0.693766	0.946485	-0.962562	0.271443	-3.54609	0.000390997	0.0024243	-1.37066	0.271851	-5.04196	4.60778e-07	4.86758e-06	-0.730437	0.271146	-2.69388	0.00706248	0.0296922	-0.607404	0.271236	-2.23939	0.0251304	0.0759147	0.00478907	0.270168	0.0177263	0.985857	1	-0.155308
Abhd8	ENSRNOG00000000054	abhydrolase domain containing 8 [Source:RGD Symbol;Acc:1305693]	10024.7	-0.135987	0.112798	-1.20558	0.227979	0.565533	0.165465	0.112779	-1.46715	0.142335	0.365544	-0.0397031	0.112825	0.351901	0.724913	0.903846	0.0691807	0.112806	0.61327	0.539698	0.887341	0.0101836	0.112661	0.0903911	0.927976	0.96417	-0.117892	0.112585	-1.04714	0.295036	0.464161	-0.0680406	0.112609	-0.604223	0.545696	0.721283	-0.00589517	0.112655	-0.0523294	0.958266	0.978668	-0.0239904	0.112442	-0.213358	0.831047	1	-0.0373893
Abi1	ENSRNOG00000031325	abl-interactor 1 [Source:RGD Symbol;Acc:621008]	2838.24	0.0018024	0.169586	0.0106282	0.99152	1	0.116161	0.169474	-0.68542	0.493079	0.728511	-0.117657	0.169808	0.69288	0.488385	0.76429	0.23562	0.169697	1.38848	0.164992	0.6289	0.090485	0.169312	0.534428	0.593045	0.752303	-0.00636432	0.169107	-0.0376349	0.969979	0.983622	-0.246811	0.169285	-1.45796	0.144851	0.30233	-0.136076	0.169307	-0.803722	0.421558	0.60025	-0.127909	0.168827	-0.757632	0.448671	1	-0.0193113
Abi2	ENSRNOG00000017707	abl-interactor 2 [Source:RGD Symbol;Acc:628771]	4777.76	-0.269009	0.138363	-1.94422	0.0518688	0.287283	-0.203891	0.138696	1.47005	0.141548	0.364562	-0.164169	0.138404	1.18615	0.235561	0.531011	-0.30873	0.138737	-2.22529	0.026062	0.320012	-0.368392	0.138489	-2.66008	0.00781216	0.0310364	-0.335698	0.137996	-2.43267	0.014988	0.0481301	-0.257727	0.138039	-1.86705	0.0618944	0.163278	-0.19755	0.137991	-1.43161	0.152254	0.301573	-0.130861	0.137622	-0.950871	0.34167	1	0.171196
Abi3	ENSRNOG00000005575	ABI family, member 3 [Source:RGD Symbol;Acc:1311794]	296.028	-0.206653	0.338607	-0.610302	0.541662	0.813743	0.858102	0.337131	-2.54531	0.0109181	0.0697374	0.417582	0.337618	-1.23685	0.216144	0.509218	0.233868	0.336136	0.695753	0.486583	0.86485	-0.373756	0.334752	-1.11652	0.264201	0.451882	-0.355682	0.336849	-1.05591	0.291009	0.460095	-0.0334981	0.335468	-0.0998549	0.92046	0.960156	0.013142	0.337474	0.0389422	0.968936	0.984039	0.162172	0.335709	0.483073	0.629044	1	-0.876175
Abl1	ENSRNOG00000009371	ABL proto-oncogene 1, non-receptor tyrosine kinase [Source:RGD Symbol;Acc:1584969]	44.5517	0.571841	0.460802	1.24097	0.214618	0.552101	-0.402908	0.460853	0.874268	0.381973	0.638392	0.229933	0.460737	-0.499054	0.617741	0.845837	-0.0610008	0.460789	-0.132383	0.894681	0.991967	-0.27584	0.46086	-0.598533	0.549484	0.71862	0.0308771	0.460971	0.0669826	0.946596	0.970205	-0.170154	0.460902	-0.369176	0.711996	0.839832	-0.912177	0.460835	-1.9794	0.0477709	0.126134	-0.371213	0.460999	-0.805236	0.420684	1	0.0961912
Abl2	ENSRNOG00000004305	ABL proto-oncogene 2, non-receptor tyrosine kinase [Source:RGD Symbol;Acc:1590898]	190.399	-0.0956578	0.393578	-0.243047	0.807969	0.942155	0.379555	0.393058	-0.965646	0.334221	0.59593	-0.464503	0.394639	1.17703	0.239182	0.536093	0.748401	0.394122	1.89891	0.0575768	0.444741	0.72331	0.393254	1.8393	0.0658718	0.167835	0.0401797	0.392695	0.102318	0.918505	0.953905	-0.466543	0.393628	-1.18524	0.235924	0.422885	-0.13262	0.392804	-0.337625	0.735646	0.847238	-0.268458	0.391919	-0.684984	0.493354	1	0.303576
Ablim2	ENSRNOG00000007882	actin binding LIM protein family, member 2 [Source:RGD Symbol;Acc:1303094]	1810.35	0.121976	0.187204	0.651566	0.514681	0.79636	-0.346001	0.187508	1.84526	0.0649994	0.22626	-0.0540759	0.187602	0.288248	0.773157	0.925999	-0.16995	0.187905	-0.904445	0.365759	0.796939	-0.260038	0.18737	-1.38783	0.165188	0.328835	-0.232459	0.186179	-1.24858	0.211818	0.368826	-0.241833	0.186723	-1.29514	0.195271	0.371245	-0.430418	0.186675	-2.30571	0.0211267	0.0657203	-0.0759834	0.185647	-0.409291	0.682326	1	0.318422
Ablim3	ENSRNOG00000019365	actin binding LIM protein family, member 3 [Source:RGD Symbol;Acc:1565118]	215.792	-1.50275	0.366112	-4.10462	4.04972e-05	0.00424108	0.878203	0.368114	-2.38568	0.0170475	0.0950494	-0.990902	0.364361	2.71956	0.00653694	0.0609343	0.366354	0.366377	0.999937	0.317341	0.76451	-0.669644	0.361989	-1.8499	0.0643276	0.164802	-1.90748	0.364001	-5.24032	1.60299e-07	1.84344e-06	-1.35857	0.362333	-3.74952	0.000177175	0.00126607	-0.193577	0.359499	-0.538463	0.590258	0.744038	0.211156	0.357335	0.590919	0.554575	1	0.359637
Abo	ENSRNOG00000046958	ABO blood group (transferase A, alpha 1-3-N-acetylgalactosaminyltransferase; transferase B, alpha 1-3-galactosyltransferase) [Source:RGD Symbol;Acc:2307241]	63.4858	-1.65916	0.453927	-3.65513	0.000257056	0.0147197	0.819772	0.454859	-1.80225	0.0715055	0.240312	-0.0290513	0.452058	0.0642644	0.94876	0.996653	-0.810339	0.453012	-1.78878	0.0736502	0.485976	-0.602546	0.452856	-1.33055	0.183338	0.354517	-1.42026	0.453568	-3.1313	0.00174037	0.00771219	0.171713	0.451687	0.380159	0.703827	0.834694	0.0682318	0.451703	0.151055	0.879933	0.936209	-0.170675	0.451333	-0.378158	0.705313	1	-0.00206239
Abo2	ENSRNOG00000045801	histo-blood group ABO system transferase 2 [Source:RGD Symbol;Acc:1311152]	0	NA	NA	NA	NA	NA	NA	NA	NA	NA	NA	NA	NA	NA	NA	NA	NA	NA	NA	NA	NA	NA	NA	NA	NA	NA	NA	NA	NA	NA	NA	NA	NA	NA	NA	NA	NA	NA	NA	NA	NA	NA	NA	NA	NA	NA	NA
Abr	ENSRNOG00000056837	active BCR-related [Source:RGD Symbol;Acc:1306279]	12249.7	-0.189466	0.151936	-1.24701	0.212392	0.550196	-0.467452	0.152032	3.0747	0.00210715	0.0217527	-0.623936	0.152018	4.10435	4.05445e-05	0.00142137	-0.0329826	0.152114	-0.216828	0.828342	0.978176	1.24361	0.152313	8.16481	3.21936e-16	1.5444e-14	1.52629	0.152114	10.0338	1.08245e-23	9.6699e-22	1.24333	0.152244	8.16666	3.17046e-16	1.49075e-14	1.62471	0.152115	10.6808	1.25177e-26	1.18706e-24	-0.0910392	0.152293	-0.597789	0.54998	1	0.184776
Abra	ENSRNOG00000007999	actin-binding Rho activating protein [Source:RGD Symbol;Acc:708493]	14.6167	-0.450828	0.328408	-1.37277	0.169824	0.499738	0.319433	0.328238	-0.973173	0.330467	0.593177	-0.345428	0.328302	1.05217	0.292723	0.595369	0.214032	0.328132	0.652274	0.514225	0.878515	-0.06638	0.329027	-0.201747	0.840115	0.916642	-0.295536	0.329051	-0.898147	0.369107	0.5421	-0.375559	0.329089	-1.14121	0.253783	NA	0.333754	0.32902	1.01439	0.310397	0.490461	0.178462	0.329663	0.541347	0.588269	1	-0.0902768
Abracl	ENSRNOG00000051450	ABRA C-terminal like [Source:RGD Symbol;Acc:1583256]	1059.8	-0.204553	0.221461	-0.923651	0.355668	0.682931	0.739873	0.220861	-3.34994	0.00080829	0.0105774	0.212174	0.22119	-0.959238	0.337439	0.641417	0.323146	0.220589	1.46492	0.142942	0.607236	0.814103	0.220684	3.689	0.000225141	0.00150942	0.731763	0.221811	3.29905	0.000970143	0.00462666	0.618349	0.22089	2.79935	0.00512053	0.0226711	0.99315	0.222097	4.4717	7.76018e-06	6.76734e-05	0.0568336	0.222445	0.255495	0.798341	1	-0.657533
Abt1	ENSRNOG00000017585	activator of basal transcription 1 [Source:RGD Symbol;Acc:1310785]	937.163	-0.0853595	0.20713	-0.412106	0.680262	0.886092	0.26955	0.206755	-1.30372	0.19233	0.438979	0.17048	0.206992	-0.823604	0.410165	0.707152	0.0137108	0.206617	0.0663587	0.947092	0.998016	0.205599	0.206304	0.996583	0.318967	0.511069	0.0668858	0.206233	0.324322	0.745695	0.848848	0.277476	0.206079	1.34645	0.178156	0.348863	0.218484	0.206807	1.05646	0.290756	0.470321	0.0662391	0.205908	0.321692	0.747686	1	-0.130837
Abtb1	ENSRNOG00000015762	ankyrin repeat and BTB (POZ) domain containing 1 [Source:RGD Symbol;Acc:1359363]	538.645	0.0659338	0.295899	0.222825	0.823671	0.947261	-0.25238	0.296204	0.852046	0.394189	0.648701	-0.102117	0.296401	0.344522	0.730453	0.907093	-0.0843291	0.296705	-0.284218	0.776243	0.968698	-0.294291	0.29588	-0.994631	0.319916	0.512521	-0.125268	0.294767	-0.424972	0.670857	0.79385	-0.230288	0.295364	-0.779674	0.435583	0.629711	0.048812	0.295628	0.165113	0.868855	0.92915	0.240014	0.294494	0.815002	0.415071	1	0.0833561
Abtb2	ENSRNOG00000008510	ankyrin repeat and BTB (POZ) domain containing 2 [Source:RGD Symbol;Acc:620724]	131.918	-0.766592	0.42843	-1.78931	0.0735653	0.334517	1.03644	0.428114	-2.42096	0.0154797	0.0884334	-0.0920119	0.427739	0.215112	0.82968	0.950584	0.361864	0.427422	0.84662	0.397207	0.818327	0.940358	0.427642	2.19894	0.0278825	0.0862623	-0.395928	0.428082	-0.924888	0.355024	0.527763	0.340974	0.427488	0.797622	0.42509	0.619122	0.684159	0.427839	1.5991	0.109797	0.236774	0.313495	0.42749	0.733337	0.463353	1	0.299841
Ac1576	ENSRNOG00000058372	uncharacterized LOC102552783 [Source:RGD Symbol;Acc:7502825]	120.275	-0.394584	0.342565	-1.15185	0.249381	0.587748	-0.0874543	0.344487	0.253868	0.799597	0.921432	0.046647	0.341644	-0.136537	0.891397	0.978466	-0.528685	0.343573	-1.53879	0.123856	0.58382	1.03122	0.348905	2.95558	0.00312079	0.014548	1.02534	0.345861	2.96459	0.00303086	0.01243	1.47148	0.345174	4.263	2.01701e-05	0.000184227	1.17233	0.344465	3.40334	0.000665668	0.00358356	-0.24759	0.347739	-0.711999	0.476465	1	0.0933353
Acaa1a	NA	NA	793.561	-0.584861	0.25116	-2.32864	0.019878	0.174709	0.168446	0.251727	-0.669163	0.503392	0.73618	-0.390631	0.251127	1.55551	0.119824	0.370092	-0.025784	0.251694	-0.102442	0.918406	0.994668	0.0840287	0.251309	0.334365	0.738104	0.854569	0.00988508	0.251046	0.0393756	0.968591	0.982619	0.255959	0.251115	1.01929	0.308065	0.503122	0.588833	0.250716	2.3486	0.0188441	0.0597198	-0.00591359	0.250602	-0.0235975	0.981174	1	-0.0943026
Acaa1b	NA	NA	65.7161	-0.101741	0.418374	-0.243181	0.807865	0.942155	0.171715	0.418116	-0.410687	0.681302	0.856581	-0.0530881	0.418716	0.126788	0.899108	0.982099	0.123062	0.418459	0.294085	0.768693	0.966491	0.460238	0.41828	1.10031	0.271197	0.459216	0.237039	0.417415	0.567874	0.57012	0.717554	0.46095	0.418305	1.10195	0.270484	0.462368	0.506141	0.418558	1.20925	0.226567	0.397369	0.167361	0.417599	0.400768	0.688591	1	0.0514839
Acaa2	ENSRNOG00000013766	acetyl-CoA acyltransferase 2 [Source:RGD Symbol;Acc:620482]	340.746	0.302838	0.378951	0.799148	0.424204	0.731364	0.433783	0.37779	-1.14821	0.250881	0.508249	0.605788	0.378789	-1.59928	0.109759	0.353207	0.130833	0.377627	0.34646	0.728997	0.95536	0.109286	0.37719	0.289739	0.772016	0.876935	-0.548448	0.377065	-1.45452	0.145803	0.280961	0.146001	0.377246	0.387019	0.698742	0.831516	-0.688859	0.378211	-1.82136	0.0685519	0.16636	0.162427	0.376319	0.431621	0.666017	1	0.223952
Acaca	ENSRNOG00000034013	acetyl-CoA carboxylase alpha [Source:RGD Symbol;Acc:621248]	161.261	-0.187424	0.423505	-0.442553	0.658089	0.876982	1.05001	0.422625	-2.48449	0.0129737	0.0782332	0.0379244	0.423442	-0.0895623	0.928635	0.991093	0.82466	0.422562	1.95157	0.0509889	0.41822	1.38796	0.422762	3.28307	0.00102683	0.00561745	-0.113537	0.422839	-0.268512	0.788305	0.876701	0.230437	0.422916	0.544877	0.585838	0.750267	-0.115747	0.422874	-0.273716	0.784303	0.877315	-0.189634	0.422205	-0.44915	0.653323	1	0.451487
Acacb	ENSRNOG00000000658	acetyl-CoA carboxylase beta [Source:RGD Symbol;Acc:620500]	14.3659	-0.057124	0.320101	-0.178456	0.858365	0.960808	0.261479	0.320472	-0.815919	0.414546	0.667155	-0.0560071	0.319828	0.175117	0.860988	0.965231	0.260362	0.320198	0.813127	0.416145	0.831116	-0.1493	0.321258	-0.464736	0.642121	0.78944	-0.0580182	0.321096	-0.180688	0.856612	0.91582	-0.250943	0.320996	-0.781766	0.434352	NA	-0.176588	0.320819	-0.55043	0.582024	0.737885	-0.175694	0.321813	-0.545951	0.585099	1	-0.352761
Acad10	ENSRNOG00000037815	acyl-CoA dehydrogenase family, member 10 [Source:RGD Symbol;Acc:1310159]	144.333	0.444526	0.40011	1.11101	0.266565	0.605152	0.555005	0.397322	-1.39686	0.162454	0.396079	0.494215	0.400401	-1.2343	0.217091	0.509542	0.505315	0.397616	1.27086	0.203778	0.662409	0.304785	0.396372	0.768938	0.44193	0.628473	-0.356729	0.396523	-0.899642	0.368311	0.541442	-0.0108235	0.397348	-0.0272393	0.978269	0.988817	-0.609635	0.399131	-1.52741	0.12666	0.263184	0.19162	0.39553	0.484463	0.628058	1	0.106509
Acad11	ENSRNOG00000010940	acyl-CoA dehydrogenase family, member 11 [Source:RGD Symbol;Acc:1306270]	159.082	1.01094	0.374351	2.70051	0.00692331	0.0991244	-0.488281	0.372412	1.31113	0.189813	0.436234	0.948793	0.374802	-2.53145	0.0113592	0.0870628	-0.426137	0.372867	-1.14287	0.253094	0.712433	0.205035	0.373387	0.549121	0.582922	0.743928	0.540309	0.370868	1.45688	0.145151	0.280078	0.631348	0.371727	1.69842	0.0894289	0.213666	-0.492343	0.374694	-1.31399	0.18885	0.351048	-0.0217139	0.371216	-0.058494	0.953355	1	0.153008
Acad9	ENSRNOG00000014178	acyl-CoA dehydrogenase family, member 9 [Source:RGD Symbol;Acc:727973]	887.772	0.00550341	0.245909	0.0223799	0.982145	0.999674	0.766081	0.24416	-3.13763	0.00170322	0.0184827	0.897433	0.244604	-3.66892	0.000243573	0.00577634	-0.125849	0.242844	-0.518227	0.6043	0.912339	-0.592006	0.241915	-2.44716	0.0143987	0.0510677	-1.09014	0.242944	-4.4872	7.21658e-06	5.9153e-05	-0.27325	0.241586	-1.13106	0.258028	0.448916	-1.22797	0.243704	-5.0388	4.68471e-07	5.12905e-06	-0.132334	0.240709	-0.549767	0.582479	1	-0.267951
Acadl	ENSRNOG00000012966	acyl-CoA dehydrogenase, long chain [Source:RGD Symbol;Acc:2011]	486.377	-0.34031	0.318781	-1.06753	0.285731	0.622334	1.22351	0.317052	-3.85903	0.00011384	0.00232376	0.753024	0.316999	-2.37548	0.0175263	0.115479	0.13018	0.315259	0.412931	0.679657	0.944683	-0.266425	0.314391	-0.847432	0.396755	0.586102	-1.10327	0.316409	-3.48684	0.000488768	0.00253706	-0.0925033	0.314564	-0.294068	0.768706	0.874493	-0.752952	0.316397	-2.37977	0.0173235	0.0557463	0.0100049	0.314003	0.0318626	0.974582	1	-0.386673
Acadm	ENSRNOG00000009845	acyl-CoA dehydrogenase, C-4 to C-12 straight chain [Source:RGD Symbol;Acc:2012]	515.454	-0.747292	0.260029	-2.87387	0.00405471	0.073974	1.15684	0.258974	-4.46701	7.932e-06	0.000293438	0.254818	0.257613	-0.989151	0.322589	0.627616	0.154731	0.256546	0.603132	0.546421	0.890921	-0.0604314	0.25544	-0.236578	0.812984	0.901063	-1.25364	0.257693	-4.86486	1.14538e-06	1.13234e-05	-0.0481078	0.255582	-0.188228	0.850698	0.922149	-0.317908	0.256575	-1.23904	0.215329	0.384164	0.188442	0.254204	0.741304	0.458509	1	0.03637
Acads	ENSRNOG00000001177	acyl-CoA dehydrogenase, C-2 to C-3 short chain [Source:RGD Symbol;Acc:620514]	365.497	-0.368814	0.291566	-1.26494	0.205893	0.545229	0.282516	0.291759	-0.96832	0.332885	0.594723	0.380618	0.290208	-1.31154	0.189677	0.476445	-0.466915	0.290402	-1.60782	0.107874	0.557542	-0.154469	0.290236	-0.532218	0.594575	0.753529	-0.364458	0.290057	-1.2565	0.208933	0.364783	0.253057	0.288525	0.87707	0.380449	0.576757	-0.160512	0.289701	-0.554061	0.579537	0.735715	-0.164868	0.28818	-0.572099	0.567255	1	-0.0725274
Acadsb	ENSRNOG00000020624	acyl-CoA dehydrogenase, short/branched chain [Source:RGD Symbol;Acc:2013]	165.142	0.207497	0.408506	0.507942	0.611494	0.852593	-0.327751	0.408867	0.801608	0.42278	0.674854	-0.390646	0.410921	0.950659	0.341778	0.64548	0.270392	0.411279	0.657443	0.510896	0.877327	-1.20257	0.40692	-2.95531	0.00312356	0.0145552	-1.11746	0.40459	-2.76195	0.00574571	0.0215495	-1.68053	0.407112	-4.12793	3.66043e-05	0.000312479	-1.39353	0.406112	-3.4314	0.000600481	0.00327265	-0.0685763	0.402157	-0.170521	0.8646	1	0.242636
Acadvl	ENSRNOG00000018114	acyl-CoA dehydrogenase, very long chain [Source:RGD Symbol;Acc:2014]	855.239	-0.231199	0.28734	-0.80462	0.421039	0.729878	0.364007	0.287114	-1.26781	0.204865	0.453384	0.309081	0.286855	-1.07748	0.281266	0.582885	-0.176273	0.286629	-0.614987	0.538563	0.886275	-0.299867	0.286119	-1.04805	0.294616	0.484561	-0.761572	0.286032	-2.66254	0.00775527	0.0278332	-0.163684	0.28561	-0.573103	0.566575	0.737061	-0.596495	0.286144	-2.08459	0.0371063	0.103635	-0.0661224	0.28483	-0.232147	0.816424	1	0.0976983
Acan	ENSRNOG00000028992	aggrecan [Source:RGD Symbol;Acc:68358]	30.2825	-0.0321799	0.443313	-0.0725896	0.942133	0.988892	0.350244	0.443809	-0.789179	0.430008	0.681053	0.350541	0.443578	-0.790259	0.429376	0.721838	-0.0324769	0.444073	-0.0731342	0.941699	0.998016	-0.0626348	0.444505	-0.140909	0.887942	0.94333	-0.127983	0.444312	-0.288047	0.773311	0.866434	0.154812	0.444637	0.348175	0.727709	0.850717	-0.388253	0.444106	-0.874235	0.38199	0.563636	-0.29245	0.445103	-0.65704	0.511155	1	-0.284896
Acap1	ENSRNOG00000015674	ArfGAP with coiled-coil, ankyrin repeat and PH domains 1 [Source:RGD Symbol;Acc:1305360]	16.0277	0	0.339093	0	1	1	0.963987	0.340894	-2.82782	0.00468663	0.0388704	0.677126	0.339971	-1.99172	0.0464023	0.212132	0.283422	0.34177	0.829277	0.406948	0.825683	-0.074198	0.34263	-0.216554	0.828556	0.909862	-0.0722787	0.340585	-0.212219	0.831936	0.902413	-0.00431653	0.342187	-0.0126145	0.989935	NA	0	0.339703	0	1	1	0.0752549	0.341193	0.220564	0.825432	1	-0.965907
Acap2	ENSRNOG00000001730	ArfGAP with coiled-coil, ankyrin repeat and PH domains 2 [Source:RGD Symbol;Acc:1562939]	433.066	0.161757	0.266198	0.607655	0.543417	0.814797	0.114215	0.265434	-0.430295	0.666981	0.848184	0.316075	0.266235	-1.1872	0.235148	0.530821	-0.0401039	0.265471	-0.151067	0.879923	0.989268	0.369016	0.265489	1.38995	0.164544	0.327862	0.445616	0.265178	1.68044	0.0928719	0.202427	0.153664	0.264428	0.581117	0.561162	0.732807	0.0433345	0.265937	0.16295	0.870558	0.929888	-0.240525	0.264916	-0.90793	0.363915	1	-0.190814
Acap3	ENSRNOG00000022307	ArfGAP with coiled-coil, ankyrin repeat and PH domains 3 [Source:RGD Symbol;Acc:1310711]	1799.32	0.0561113	0.162539	0.345217	0.729931	0.908562	0.139	0.162252	-0.856696	0.391613	0.646731	0.130649	0.162652	-0.803245	0.421833	0.715868	0.0644626	0.162365	0.397023	0.691351	0.945951	0.21966	0.162094	1.35514	0.175373	0.343751	0.0857136	0.161768	0.529855	0.596213	0.737297	0.149149	0.161903	0.921227	0.356932	0.554416	-0.130456	0.162137	-0.804601	0.42105	0.599804	-0.160058	0.161364	-0.991905	0.321244	1	-0.00505419
Acat1	ENSRNOG00000007862	acetyl-CoA acetyltransferase 1 [Source:RGD Symbol;Acc:2016]	1949.95	0.0192993	0.171477	0.112547	0.91039	0.979494	-0.0192698	0.171459	0.112387	0.910517	0.969697	-0.160804	0.171801	0.93599	0.349278	0.652199	0.160833	0.171783	0.936259	0.34914	0.783144	0.352344	0.171581	2.05351	0.0400229	0.114878	0.517627	0.171293	3.02188	0.00251206	0.0105767	0.33692	0.171647	1.96286	0.0496619	0.138532	0.56893	0.1717	3.31352	0.000921304	0.00473584	0.0706025	0.171516	0.411639	0.680604	1	-0.146013
Acat2	ENSRNOG00000019189	acetyl-CoA acetyltransferase 2 [Source:RGD Symbol;Acc:1359366]	461.245	0.392851	0.302692	1.29786	0.194336	0.528814	0.00883724	0.300926	-0.0293668	0.976572	0.997389	-0.170826	0.305524	0.559124	0.576077	0.821848	0.572514	0.303777	1.88465	0.0594769	0.44988	-1.10068	0.298252	-3.69045	0.000223861	0.00150168	-1.37318	0.296823	-4.62624	3.72371e-06	3.25804e-05	-1.71727	0.299977	-5.72466	1.0364e-08	1.73792e-07	-1.79086	0.299611	-5.97727	2.26902e-09	3.62807e-08	-0.0248289	0.29367	-0.0845468	0.932622	1	0.263655
Acbd3	ENSRNOG00000003185	acyl-CoA binding domain containing 3 [Source:RGD Symbol;Acc:727851]	767.122	0.334443	0.204591	1.63469	0.102115	0.39689	-0.296496	0.204511	1.44978	0.14712	0.373876	-0.0750564	0.205265	0.365656	0.714622	0.898808	0.113004	0.205185	0.550741	0.581811	0.905431	1.99655	0.20876	9.56388	1.13424e-21	1.04254e-19	2.03258	0.206729	9.83209	8.19012e-23	6.51405e-21	1.69941	0.207728	8.18094	2.81646e-16	1.34583e-14	1.86982	0.208136	8.98366	2.61905e-19	1.25146e-17	0.171689	0.210235	0.81665	0.414128	1	0.260472
Acbd4	ENSRNOG00000003108	acyl-CoA binding domain containing 4 [Source:RGD Symbol;Acc:1308404]	1045.66	0.745921	0.215789	3.45672	0.00054679	0.0231827	-0.586242	0.215314	2.72273	0.00647454	0.0483865	0.142916	0.217185	-0.658039	0.510513	0.779083	0.0167625	0.216714	0.0773485	0.938346	0.997344	-0.783176	0.214807	-3.64595	0.000266402	0.00173392	-0.127917	0.213044	-0.600423	0.548225	0.701116	-0.950627	0.214289	-4.4362	9.15613e-06	9.09808e-05	-0.87755	0.215239	-4.0771	4.56008e-05	0.000333828	-0.00371263	0.212487	-0.0174723	0.98606	1	-0.0690169
Acbd5	ENSRNOG00000017642	acyl-CoA binding domain containing 5 [Source:RGD Symbol;Acc:1309411]	163.571	-0.0548529	0.32601	-0.168255	0.866382	0.965173	0.325827	0.324676	-1.00355	0.315598	0.578001	0.195607	0.325689	-0.600593	0.548111	0.802724	0.0753675	0.324354	0.232362	0.816257	0.976309	-0.0527027	0.322527	-0.163406	0.870199	0.93429	-0.482647	0.321968	-1.49905	0.13386	0.264332	0.0166355	0.322408	0.0515975	0.958849	0.980821	-0.0391416	0.324408	-0.120655	0.903964	0.949422	0.388652	0.320342	1.21324	0.225037	1	0.104117
Acbd6	ENSRNOG00000003550	acyl-CoA binding domain containing 6 [Source:RGD Symbol;Acc:1305030]	1357.41	0.0909361	0.167583	0.542632	0.587383	0.837598	-0.497196	0.168333	2.95365	0.00314044	0.0290445	0.152794	0.167729	-0.910956	0.362319	0.664809	-0.559053	0.168478	-3.31826	0.000905794	0.0649223	-0.1718	0.168459	-1.01983	0.307808	0.498764	0.192656	0.166766	1.15525	0.24799	0.412302	0.290308	0.166993	1.73845	0.082132	0.200386	0.219352	0.167549	1.30918	0.190475	0.35279	0.117632	0.166732	0.705517	0.480489	1	0.13274
Acbd7	ENSRNOG00000016480	acyl-CoA binding domain containing 7 [Source:RGD Symbol;Acc:1564164]	21.1342	-0.264257	0.407766	-0.648061	0.516945	0.797405	0.385261	0.407976	-0.944322	0.345005	0.606798	-0.492347	0.407063	1.20951	0.226467	0.519778	0.61335	0.407273	1.50599	0.132069	0.592916	0.516857	0.40812	1.26643	0.205358	0.382005	0.402366	0.407803	0.986668	0.323805	0.494411	0.00855361	0.407297	0.0210009	0.983245	0.991356	0.42386	0.408022	1.03882	0.29889	0.477669	-0.242763	0.408059	-0.594922	0.551895	1	-0.270771
Accs	ENSRNOG00000009199	1-aminocyclopropane-1-carboxylate synthase homolog (Arabidopsis)(non-functional) [Source:RGD Symbol;Acc:1309314]	52.4329	0.388878	0.458052	0.848983	0.395891	0.710738	-0.508666	0.457977	1.11068	0.266706	0.525703	0.944362	0.458182	-2.0611	0.039293	0.191218	-1.06415	0.458108	-2.32292	0.0201832	0.29132	-0.493572	0.458055	-1.07754	0.281239	0.470791	-0.524315	0.458679	-1.1431	0.252998	0.418032	0.317347	0.458738	0.691784	0.489073	0.676536	-0.31341	0.458145	-0.684084	0.493922	0.664349	0.599784	0.458771	1.30737	0.191087	1	0.539409
Accsl	ENSRNOG00000042533	1-aminocyclopropane-1-carboxylate synthase homolog (Arabidopsis)(non-functional)-like [Source:RGD Symbol;Acc:1596039]	0.2083	0	0.0998606	0	1	NA	0	0.0998606	0	1	NA	0	0.0998606	0	1	NA	0	0.0998606	0	1	NA	0	0.0998606	0	1	NA	0	0.0998606	0	1	NA	-0.130973	0.0998606	-1.31156	0.189667	NA	0	0.0998606	0	1	NA	0	0.0998606	0	1	1	0
Acd	ENSRNOG00000038973	adrenocortical dysplasia homolog (mouse) [Source:RGD Symbol;Acc:1565053]	1019.91	-0.179941	0.171814	-1.0473	0.294961	0.630697	0.03594	0.172107	-0.208824	0.834586	0.938849	-0.409241	0.172744	2.36907	0.017833	0.116562	0.26524	0.173035	1.53287	0.125307	0.58382	-0.13904	0.171398	-0.811212	0.417244	0.605743	0.176733	0.171153	1.0326	0.301791	0.471007	-0.631132	0.171285	-3.6847	0.000228975	0.00158703	0.103871	0.171089	0.607119	0.543772	0.706405	-0.252803	0.170425	-1.48337	0.137977	1	-0.351712
Ace	NA	NA	87.3428	0.838631	0.458925	1.82738	0.0676426	0.324172	-1.24893	0.459217	2.71969	0.00653427	0.0486416	-0.184911	0.459648	0.402288	0.687472	0.886997	-0.225387	0.459929	-0.490047	0.624101	0.920986	-1.67354	0.458961	-3.64637	0.000265975	0.00173208	-0.829256	0.457789	-1.81144	0.0700731	0.163322	-1.08569	0.458784	-2.36644	0.0179598	0.0629639	-1.83545	0.458481	-4.00333	6.24569e-05	0.000444042	-0.167566	0.45733	-0.3664	0.714066	1	0.404646
Ace2	ENSRNOG00000031665	angiotensin I converting enzyme 2 [Source:RGD Symbol;Acc:728890]	6.06032	0.0968383	0.218756	0.442678	0.657999	NA	0.118098	0.219022	-0.539206	0.589745	0.798485	-0.0117196	0.218466	0.0536447	0.957218	0.99874	0.226656	0.218733	1.03622	0.300099	NA	0.102146	0.219235	0.465922	0.641272	NA	-0.105954	0.219588	-0.482514	0.629441	NA	0	0.219114	0	1	NA	-0.223041	0.219131	-1.01784	0.308752	NA	-0.020248	0.219962	-0.0920521	0.926657	1	0.0900025
Acer1	ENSRNOG00000047368	alkaline ceramidase 1 [Source:RGD Symbol;Acc:1588582]	5.39461	0	0.235664	0	1	NA	0.0860455	0.235845	-0.364839	0.715232	NA	0	0.235395	0	1	1	0.0854646	0.235576	0.36279	0.716762	NA	-0.00417269	0.236273	-0.0176604	0.98591	NA	-0.0743174	0.236762	-0.313891	0.753604	NA	0	0.236368	0	1	NA	-0.114712	0.236247	-0.485559	0.62728	NA	-0.0415233	0.237343	-0.174951	0.861118	1	-0.0159007
Acer2	ENSRNOG00000007637	alkaline ceramidase 2 [Source:RGD Symbol;Acc:1304629]	55.1227	-0.0503458	0.439428	-0.114571	0.908785	0.979179	0.00496302	0.439408	-0.0112948	0.990988	1	-0.526872	0.438937	1.20034	0.230009	0.524004	0.481489	0.438917	1.09699	0.272644	0.728683	0.00611773	0.439534	0.0139187	0.988895	0.993847	-0.0477797	0.439822	-0.108634	0.913493	0.950831	-0.254562	0.43918	-0.579629	0.562165	0.733109	-0.238255	0.439732	-0.54182	0.587943	0.742335	-0.240822	0.440126	-0.547165	0.584265	1	0.0489344
Ache	ENSRNOG00000050841	acetylcholinesterase [Source:RGD Symbol;Acc:69313]	1312.81	0.017897	0.217751	0.0821901	0.934496	0.98704	-0.908108	0.219371	4.13961	3.47901e-05	0.00096245	-1.14994	0.22011	5.22439	1.7473e-07	1.61014e-05	0.259727	0.221711	1.17147	0.24141	0.700425	-0.630755	0.219423	-2.8746	0.00404536	0.0180075	-0.702152	0.216519	-3.24291	0.00118316	0.00551248	-0.614718	0.219954	-2.79476	0.00519379	0.0229264	-0.742612	0.216936	-3.42318	0.000618927	0.00335981	-0.0225626	0.215699	-0.104602	0.916692	1	0.979506
Acin1	ENSRNOG00000013533	apoptotic chromatin condensation inducer 1 [Source:RGD Symbol;Acc:1311945]	2329.58	0.167097	0.179975	0.928446	0.353176	0.680635	-0.157755	0.179956	0.876633	0.380686	0.637598	-0.0800143	0.180214	0.443996	0.657045	0.869389	0.0893555	0.180196	0.495881	0.619979	0.918973	1.09459	0.180689	6.05788	1.37931e-09	2.67484e-08	1.04566	0.180114	5.80555	6.41568e-09	9.33092e-08	0.916792	0.180479	5.07978	3.77877e-07	4.94098e-06	0.95188	0.180485	5.274	1.33479e-07	1.60853e-06	0.0733182	0.180624	0.405916	0.684804	1	0.206688
Ackr2	ENSRNOG00000019472	atypical chemokine receptor 2 [Source:RGD Symbol;Acc:620323]	49.4966	0.350177	0.460903	0.759764	0.447396	0.749906	-0.333731	0.460901	0.724085	0.469014	0.71143	1.23025	0.460707	-2.67036	0.00757701	0.0678827	-1.21381	0.460704	-2.63468	0.00842175	0.190864	-1.54165	0.460526	-3.34759	0.00081518	0.00461692	-0.889998	0.460426	-1.93299	0.0532376	0.131843	-0.0142777	0.460217	-0.0310239	0.97525	0.987152	-1.0945	0.46061	-2.37621	0.0174917	0.0562143	0.145672	0.460105	0.316605	0.751543	1	-0.317922
Ackr3	ENSRNOG00000019622	atypical chemokine receptor 3 [Source:RGD Symbol;Acc:620601]	204.554	-0.836378	0.419809	-1.99228	0.04634	0.27192	0.984962	0.419642	-2.34715	0.0189177	0.102732	-0.283712	0.419307	0.676621	0.498646	0.770709	0.432296	0.41914	1.03139	0.302358	0.753024	0.578168	0.418866	1.38032	0.167489	0.332193	-0.715777	0.419305	-1.70705	0.0878123	0.194075	-0.100155	0.418875	-0.239105	0.811024	0.898632	0.0165967	0.4186	0.039648	0.968374	0.983775	-0.104005	0.418093	-0.24876	0.803546	1	0.308982
Acly	ENSRNOG00000016924	ATP citrate lyase [Source:RGD Symbol;Acc:2018]	2725.64	0.157533	0.156587	1.00604	0.314396	0.645795	-0.166635	0.15658	1.06422	0.28723	0.546605	-0.0613266	0.156864	0.390954	0.695831	0.890372	0.0522245	0.156857	0.332944	0.739177	0.958008	0.476394	0.156876	3.03676	0.00239132	0.0116339	0.276951	0.156182	1.77325	0.0761866	0.174383	0.56033	0.156835	3.57274	0.000353262	0.002307	0.203017	0.156602	1.29639	0.19484	0.358826	0.0836	0.156197	0.535223	0.592495	1	0.366079
Acmsd	ENSRNOG00000003884	aminocarboxymuconate semialdehyde decarboxylase [Source:RGD Symbol;Acc:620868]	0.525118	0	0.0999393	0	1	NA	0	0.0999393	0	1	NA	0	0.0998606	0	1	NA	0	0.0998606	0	1	NA	0	0.10005	0	1	NA	0	0.100247	0	1	NA	-0.0385868	0.100174	-0.385196	0.700092	NA	0	0.100141	0	1	NA	0	0.100449	0	1	1	0
Acnat2	ENSRNOG00000051912	acyl-coenzyme A amino acid N-acyltransferase 2 [Source:RGD Symbol;Acc:1359532]	0	NA	NA	NA	NA	NA	NA	NA	NA	NA	NA	NA	NA	NA	NA	NA	NA	NA	NA	NA	NA	NA	NA	NA	NA	NA	NA	NA	NA	NA	NA	NA	NA	NA	NA	NA	NA	NA	NA	NA	NA	NA	NA	NA	NA	NA	NA
Aco1	ENSRNOG00000005849	aconitase 1, soluble [Source:RGD Symbol;Acc:2019]	522.219	-0.577756	0.265971	-2.17225	0.0298366	0.219732	0.0784935	0.266806	-0.294197	0.768607	0.905823	-0.403226	0.265967	1.51608	0.1295	0.386817	-0.0960365	0.266802	-0.359955	0.718881	0.953288	0.287993	0.266773	1.07954	0.280346	0.469949	0.329917	0.266315	1.23882	0.215412	0.373239	0.498287	0.266358	1.87074	0.0613813	0.162289	0.518202	0.265362	1.95281	0.0508422	0.132624	-0.389472	0.265707	-1.46579	0.142705	1	-0.120418
Aco2	ENSRNOG00000024128	aconitase 2, mitochondrial [Source:RGD Symbol;Acc:621360]	8498.03	0.0645828	0.105522	0.61203	0.540518	0.812937	-0.084847	0.105524	0.804057	0.421364	0.67336	-0.0801482	0.105653	0.758598	0.448093	0.735104	0.059884	0.105654	0.566792	0.570856	0.900591	-0.00745958	0.10547	-0.0707269	0.943615	0.969858	0.0877374	0.105264	0.833495	0.404565	0.574727	-0.0214824	0.105417	-0.203785	0.838522	0.915993	-0.0493911	0.105415	-0.468539	0.639399	0.781066	-0.0725458	0.105157	-0.689879	0.49027	1	-0.01035
Acot1	ENSRNOG00000055221	acyl-CoA thioesterase 1 [Source:RGD Symbol;Acc:70894]	58.8295	-0.483855	0.457787	-1.05694	0.290538	0.626408	0.0762577	0.457657	-0.166626	0.867664	0.950928	-0.632682	0.457669	1.3824	0.166849	0.445295	0.225085	0.457539	0.491947	0.622757	0.919957	0.113814	0.457715	0.248657	0.803626	0.896329	-0.147924	0.457877	-0.323066	0.746645	0.849058	-0.0454559	0.457689	-0.0993161	0.920887	0.960432	0.440428	0.457895	0.961855	0.336123	0.517965	0.104498	0.457984	0.228169	0.819515	1	0.185481
Acot11	ENSRNOG00000007837	acyl-CoA thioesterase 11 [Source:RGD Symbol;Acc:2324815]	14.7005	0.367659	0.339949	1.08151	0.27947	0.615308	-0.224498	0.340277	0.65975	0.509414	0.741036	0	0.33906	0	1	1	0.144603	0.339388	0.426069	0.670057	0.940955	-0.250839	0.340598	-0.736465	0.461448	0.64606	-0.00751864	0.341592	-0.0220106	0.98244	0.990312	-0.339351	0.340627	-0.996252	0.319128	NA	-0.298924	0.340286	-0.87845	0.3797	0.560995	0.0762537	0.341927	0.223011	0.823527	1	-0.018822
Acot12	ENSRNOG00000061414	acyl-CoA thioesterase 12 [Source:RGD Symbol;Acc:619752]	0.80229	0	0.100355	0	1	NA	0	0.100371	0	1	NA	0	0.100219	0	1	NA	0	0.100235	0	1	NA	0	0.100531	0	1	NA	0	0.100868	0	1	NA	0	0.100711	0	1	NA	0	0.100583	0	1	NA	0	0.101094	0	1	1	0
Acot13	ENSRNOG00000018415	acyl-CoA thioesterase 13 [Source:RGD Symbol;Acc:1306513]	1373.67	0.163171	0.159694	1.02177	0.306888	0.640076	-0.377329	0.159999	2.35833	0.0183574	0.100424	-0.115835	0.160242	0.722873	0.469758	0.751159	-0.0983232	0.160545	-0.612432	0.540252	0.887557	0.700339	0.161189	4.34483	1.39381e-05	0.000126663	1.2017	0.160263	7.49826	6.46692e-14	1.79964e-12	0.882971	0.160799	5.49115	3.99317e-08	6.11991e-07	1.14408	0.16112	7.1008	1.24033e-12	3.00409e-11	0.105555	0.161684	0.652848	0.513854	1	-0.124028
Acot2	ENSRNOG00000010134	acyl-CoA thioesterase 2 [Source:RGD Symbol;Acc:621055]	214.822	0.0862958	0.371815	0.232094	0.816465	0.946101	-0.638262	0.373083	1.71078	0.0871226	0.27211	-0.141226	0.372508	0.379123	0.704596	0.894803	-0.41074	0.373773	-1.0989	0.271811	0.727755	-0.170229	0.373474	-0.455797	0.648536	0.793922	0.339742	0.371062	0.915594	0.35988	0.532925	0.19833	0.371942	0.533229	0.593875	0.75598	0.21339	0.371758	0.574002	0.565967	0.724607	-0.0400561	0.371005	-0.107967	0.914022	1	0.128292
Acot3	ENSRNOG00000053460	acyl-CoA thioesterase 3 [Source:RGD Symbol;Acc:1564089]	292.214	-0.11772	0.332238	-0.354325	0.723095	0.906084	0.22098	0.332002	-0.665598	0.505668	0.737969	-0.435278	0.333261	1.30612	0.191513	0.478912	0.538538	0.333027	1.6171	0.105856	0.556351	0.612048	0.332306	1.84182	0.0655012	0.167133	0.34209	0.331806	1.031	0.302543	0.471761	-0.10232	0.332675	-0.307569	0.758411	0.868016	0.419812	0.332176	1.26382	0.206293	0.372572	-0.0399979	0.331744	-0.120569	0.904033	1	0.0489775
Acot4	ENSRNOG00000046864	acyl-CoA thioesterase 4 [Source:RGD Symbol;Acc:1596753]	256.946	0.127261	0.37287	0.341303	0.732876	0.909913	-0.851199	0.374836	2.27085	0.0231558	0.117125	0.33463	0.372812	-0.897584	0.369407	0.670851	-1.05857	0.37478	-2.82451	0.00473532	0.151236	-0.975669	0.374325	-2.60648	0.00914789	0.035475	-0.380012	0.371048	-1.02416	0.305761	0.475637	-0.0565459	0.371147	-0.152354	0.878908	0.937358	-0.541802	0.371902	-1.45684	0.14516	0.291269	-0.0345293	0.370074	-0.0933037	0.925662	1	0.255542
Acot5	ENSRNOG00000032508	acyl-CoA thioesterase 5 [Source:RGD Symbol;Acc:1565917]	24.1725	0.118808	0.448214	0.265071	0.790955	0.933647	-0.113687	0.448257	0.25362	0.799789	0.921463	-0.447564	0.446843	1.00161	0.31653	0.620847	0.452686	0.446886	1.01298	0.311071	0.760587	-0.716158	0.449121	-1.59458	0.110807	0.246239	-0.401461	0.449749	-0.892633	0.372054	0.544375	-0.821782	0.448235	-1.83337	0.066747	0.17229	-0.173511	0.448687	-0.386709	0.698972	0.822489	0.346758	0.450219	0.770199	0.441182	1	-0.201011
Acot6	ENSRNOG00000029637	acyl-CoA thioesterase 6 [Source:RGD Symbol;Acc:1309669]	27.029	0.458369	0.441023	1.03933	0.29865	0.632773	-0.137869	0.441841	0.312032	0.755016	0.898414	0.942074	0.441461	-2.13399	0.0328432	0.171124	-0.621574	0.442277	-1.40539	0.159904	0.621665	-0.210141	0.442264	-0.475147	0.634682	0.78454	-0.635725	0.44377	-1.43256	0.151985	0.290087	-0.134922	0.444165	-0.303766	0.761306	0.86963	-0.824359	0.44189	-1.86553	0.0621073	0.15496	0.269735	0.44463	0.606651	0.544083	1	0.563453
Acot7	ENSRNOG00000010580	acyl-CoA thioesterase 7 [Source:RGD Symbol;Acc:628856]	7630.47	0.111181	0.122762	0.905665	0.365113	0.690841	-0.2657	0.122832	2.16312	0.0305322	0.139612	-0.180425	0.12296	1.46735	0.14228	0.407993	0.0259063	0.12303	0.210569	0.833223	0.979142	-0.143423	0.122794	-1.16799	0.242811	0.428945	-0.0835191	0.122438	-0.682132	0.495155	0.656585	-0.156901	0.12271	-1.27864	0.201024	0.379188	-0.140296	0.122644	-1.14393	0.252654	0.427728	0.0544041	0.12232	0.444767	0.656488	1	0.205796
Acot8	ENSRNOG00000015187	acyl-CoA thioesterase 8 [Source:RGD Symbol;Acc:70368]	725.569	-0.0204484	0.268401	-0.0761861	0.939271	0.988741	0.310703	0.267877	-1.15987	0.246102	0.503174	0.558743	0.267854	-2.086	0.0369787	0.184408	-0.268489	0.267329	-1.00434	0.315215	0.763746	-0.0891017	0.267089	-0.333603	0.738679	0.854988	-0.415867	0.266953	-1.55782	0.119275	0.243442	0.312871	0.26658	1.17365	0.240535	0.428343	-0.258972	0.267627	-0.96766	0.333214	0.515512	0.136446	0.266175	0.51262	0.608217	1	0.0160623
Acot9	ENSRNOG00000003782	acyl-CoA thioesterase 9 [Source:RGD Symbol;Acc:1359188]	908.434	-0.115779	0.230781	-0.501684	0.61589	0.85502	0.523507	0.229845	-2.27765	0.0227476	0.115945	0.766245	0.22954	-3.33818	0.000843283	0.0142959	-0.358518	0.228599	-1.56833	0.116805	0.575835	-0.650663	0.227844	-2.85575	0.00429359	0.0189097	-0.869854	0.228448	-3.80766	0.000140285	0.00083994	-0.187558	0.227044	-0.826088	0.408754	0.603101	-0.677925	0.229041	-2.95984	0.00307802	0.0133753	0.0761499	0.22669	0.335922	0.73693	1	-0.304316
Acox1	ENSRNOG00000008755	acyl-CoA oxidase 1, palmitoyl [Source:RGD Symbol;Acc:619757]	359.584	-1.10787	0.399269	-2.77474	0.00552454	0.0877586	1.675	0.398214	-4.20628	2.59604e-05	0.000774208	0.391019	0.396052	-0.987294	0.323498	0.628721	0.176115	0.394983	0.445879	0.655685	0.935537	-0.74601	0.393619	-1.89526	0.0580583	0.152604	-2.80048	0.396661	-7.06013	1.66352e-12	3.83325e-11	-0.895685	0.39364	-2.27539	0.0228826	0.0765467	-1.87378	0.394351	-4.75154	2.0187e-06	1.98141e-05	-0.181165	0.391692	-0.462518	0.64371	1	0.379468
Acox2	ENSRNOG00000007378	acyl-CoA oxidase 2, branched chain [Source:RGD Symbol;Acc:628684]	4.56537	0.419374	0.327335	1.28118	0.200132	NA	-0.189135	0.328756	0.575306	0.565085	NA	0.749856	0.327932	-2.28662	0.022218	0.133922	-0.519618	0.329352	-1.5777	0.114635	NA	0.122036	0.328415	0.37159	0.710198	NA	0.138233	0.331881	0.416515	0.677033	NA	0.550404	0.332063	1.65753	0.0974128	NA	-0.258398	0.327997	-0.787806	0.43081	NA	0.0227425	0.332538	0.0683908	0.945475	1	0.172937
Acox3	ENSRNOG00000008474	acyl-CoA oxidase 3, pristanoyl [Source:RGD Symbol;Acc:69245]	204.802	-0.924739	0.410875	-2.25066	0.0244071	0.195924	0.771054	0.411134	-1.87543	0.0607333	0.217904	-0.526525	0.410311	1.28324	0.19941	0.490189	0.372841	0.410571	0.908103	0.363824	0.795713	-0.899369	0.408181	-2.20336	0.0275693	0.0854252	-1.63714	0.409196	-4.00087	6.31109e-05	0.000417815	-1.21857	0.408669	-2.98179	0.00286565	0.013914	-0.874926	0.407745	-2.14577	0.0318917	0.0917742	-0.162525	0.406044	-0.400263	0.688963	1	-0.0332832
Acoxl	ENSRNOG00000016179	acyl-CoA oxidase-like [Source:RGD Symbol;Acc:1306814]	2.36281	0.0151384	0.143796	0.105277	0.916156	NA	-0.015155	0.143811	0.105382	0.916073	NA	0	0.143655	0	1	NA	0	0.14367	0	1	NA	-0.143341	0.144036	-0.995172	0.319652	NA	0.015666	0.144283	0.108578	0.913537	NA	-0.134831	0.144197	-0.935043	0.349766	NA	-0.0382135	0.144022	-0.26533	0.790755	NA	-0.038741	0.144509	-0.268087	0.788632	1	-0.143852
Acp1	ENSRNOG00000005260	acid phosphatase 1, soluble [Source:RGD Symbol;Acc:2020]	740.453	0.226145	0.208179	1.0863	0.277347	0.61383	-0.366148	0.208534	1.75582	0.0791188	0.256907	0.0154153	0.209015	-0.0737521	0.941208	0.994197	-0.155419	0.209369	-0.742323	0.457892	0.852574	-0.278856	0.208277	-1.33888	0.180611	0.350765	0.0130568	0.206298	0.0632906	0.949535	0.972004	-0.266593	0.207091	-1.28733	0.19798	0.375182	-0.168904	0.207691	-0.813247	0.416076	0.595333	0.0441835	0.205806	0.214686	0.830012	1	0.0742353
Acp2	ENSRNOG00000013594	acid phosphatase 2, lysosomal [Source:RGD Symbol;Acc:2021]	837.467	0.214861	0.216117	0.994189	0.320131	0.650362	-0.239886	0.216135	1.10989	0.267047	0.52589	0.0601909	0.216716	-0.277741	0.781211	0.928491	-0.0852154	0.216734	-0.39318	0.694186	0.946485	-0.529076	0.21542	-2.45602	0.0140485	0.0500466	-0.0597231	0.214444	-0.278502	0.780627	0.871783	-0.0316671	0.215334	-0.14706	0.883084	0.939511	-0.401368	0.215396	-1.8634	0.0624062	0.155454	-0.126783	0.213717	-0.593231	0.553027	1	-0.229467
Acp5	ENSRNOG00000046261	acid phosphatase 5, tartrate resistant [Source:RGD Symbol;Acc:2022]	88.7438	0.57356	0.452962	1.26624	0.205425	0.544948	-0.0749904	0.452534	0.165712	0.868383	0.95109	0.910919	0.452873	-2.01142	0.0442806	0.205861	-0.41235	0.452444	-0.911382	0.362094	0.794051	-0.131422	0.452385	-0.29051	0.771426	0.876627	0.0755106	0.45214	0.167007	0.867364	0.922833	0.437956	0.452078	0.96876	0.332665	0.529078	-0.317203	0.452917	-0.700356	0.483705	0.655164	0.180846	0.452095	0.400019	0.689143	1	-0.131943
Acp6	ENSRNOG00000017494	acid phosphatase 6, lysophosphatidic [Source:RGD Symbol;Acc:1306336]	237.843	0.258539	0.387395	0.667378	0.504531	0.790374	0.00460675	0.386889	-0.0119072	0.9905	1	0.121132	0.387858	-0.31231	0.754805	0.918156	0.142014	0.387352	0.366628	0.713896	0.95145	-0.236885	0.386343	-0.613146	0.53978	0.710637	0.0844672	0.386093	0.218774	0.826826	0.898705	-0.21783	0.386417	-0.563716	0.572947	0.741373	-0.353188	0.38689	-0.912891	0.3613	0.543714	-0.179116	0.385584	-0.464531	0.642267	1	-0.325959
Acpp	ENSRNOG00000011820	acid phosphatase, prostate [Source:RGD Symbol;Acc:2023]	1.27647	-0.0399981	0.142534	-0.280621	0.779001	NA	0.0196196	0.14253	-0.137653	0.890515	NA	-0.0397521	0.142304	0.279346	0.779979	NA	0.0193736	0.1423	0.136147	0.891705	NA	-0.104568	0.14293	-0.731603	0.464411	NA	-0.0229009	0.14336	-0.159744	0.873083	NA	-0.0483145	0.143123	-0.337574	0.735684	NA	-0.00575318	0.142964	-0.0402421	0.9679	NA	-0.0228504	0.143789	-0.158916	0.873735	1	-0.101286
Acpt	ENSRNOG00000021659	acid phosphatase, testicular [Source:RGD Symbol;Acc:1308270]	4.57639	0	0.206103	0	1	NA	0.364805	0.206597	-1.76578	0.077433	NA	0.0229762	0.205918	-0.111579	0.911157	0.986214	0.341096	0.206413	1.6525	0.098433	NA	0.106773	0.207093	0.515583	0.606146	NA	-0.0467416	0.206958	-0.225851	0.821317	NA	-0.026295	0.206745	-0.127186	0.898793	NA	-0.281691	0.206708	-1.36275	0.172963	NA	-0.235682	0.207562	-1.13548	0.256174	1	-0.21129
Acr	ENSRNOG00000029762	acrosin [Source:RGD Symbol;Acc:2024]	3.3756	0.0976637	0.102303	0.954648	0.339756	NA	-0.0976665	0.102307	0.95464	0.33976	NA	0	0.102255	0	1	NA	0	0.102259	0	1	NA	0	0.102328	0	1	NA	0.0867953	0.102424	0.847408	0.396768	NA	0	0.10237	0	1	NA	-0.0342479	0.102344	-0.334634	0.737901	NA	-0.0233795	0.102465	-0.228169	0.819515	1	0.010941
Acrbp	ENSRNOG00000017399	acrosin binding protein [Source:RGD Symbol;Acc:1564880]	9.32266	-0.302401	0.29285	-1.03261	0.301786	NA	0	0.29228	0	1	1	0.0844188	0.293214	-0.287908	0.773417	0.926105	-0.38486	0.292645	-1.31511	0.188473	0.649021	-0.124667	0.292857	-0.425694	0.670331	NA	-0.0710887	0.293577	-0.242147	0.808666	0.88873	0.268167	0.293959	0.91226	0.361632	NA	0.304199	0.293397	1.03682	0.299821	0.478967	0.0728875	0.294123	0.247813	0.804279	1	-0.0555384
Acrv1	ENSRNOG00000008508	acrosomal vesicle protein 1 [Source:RGD Symbol;Acc:620153]	0.105852	0	0.0998606	0	1	NA	0	0.0998606	0	1	NA	0	0.0998606	0	1	NA	0	0.0998606	0	1	NA	0	0.0998606	0	1	NA	0	0.0998606	0	1	NA	0	0.0998606	0	1	NA	0	0.0998606	0	1	NA	0	0.0998606	0	1	1	0
Acsbg1	ENSRNOG00000011381	acyl-CoA synthetase bubblegum family member 1 [Source:RGD Symbol;Acc:708557]	2415.54	-0.243822	0.174061	-1.40079	0.161278	0.48792	-0.230575	0.174535	1.32108	0.186476	0.432743	-0.481001	0.174457	2.75713	0.00583117	0.0562662	0.00660441	0.174931	0.0377544	0.969884	1	-0.332606	0.174287	-1.90838	0.0563423	0.149037	-0.34484	0.173521	-1.98731	0.0468883	0.11938	-0.378133	0.174051	-2.17254	0.029815	0.0939612	-0.132983	0.173587	-0.766091	0.443622	0.620698	-0.0319656	0.173045	-0.184724	0.853445	1	0.242809
Acsbg2	ENSRNOG00000045947	acyl-CoA synthetase bubblegum family member 2 [Source:RGD Symbol;Acc:1588580]	0	NA	NA	NA	NA	NA	NA	NA	NA	NA	NA	NA	NA	NA	NA	NA	NA	NA	NA	NA	NA	NA	NA	NA	NA	NA	NA	NA	NA	NA	NA	NA	NA	NA	NA	NA	NA	NA	NA	NA	NA	NA	NA	NA	NA	NA	NA
Acsf2	ENSRNOG00000003330	acyl-CoA synthetase family member 2 [Source:RGD Symbol;Acc:1562656]	718.076	0.2297	0.251322	0.913965	0.360735	0.687456	-0.554747	0.251968	2.20166	0.0276893	0.132092	-0.630353	0.253261	2.48895	0.0128121	0.0945092	0.305305	0.253901	1.20246	0.229186	0.68771	-0.389354	0.251887	-1.54575	0.122166	0.264603	-0.100342	0.24993	-0.401478	0.688068	0.806858	-0.477427	0.252461	-1.89109	0.0586122	0.15673	-0.373687	0.250789	-1.49005	0.136212	0.27834	-0.043646	0.249394	-0.175008	0.861073	1	0.265735
Acsl1	ENSRNOG00000010633	acyl-CoA synthetase long-chain family member 1 [Source:RGD Symbol;Acc:2015]	1197.51	-0.269339	0.269346	-0.999973	0.317323	0.648378	0.718491	0.268992	-2.67105	0.00756138	0.0538682	-0.123486	0.269368	0.458428	0.646645	0.864014	0.572638	0.269014	2.12866	0.0332827	0.354326	0.764972	0.268844	2.84541	0.00443544	0.0194067	-0.111605	0.268951	-0.414964	0.678168	0.79951	0.335153	0.269205	1.24498	0.213141	0.39506	0.144432	0.269006	0.536909	0.59133	0.744934	-0.0133022	0.26861	-0.0495225	0.960503	1	0.158085
Acsl3	ENSRNOG00000014718	acyl-CoA synthetase long-chain family member 3 [Source:RGD Symbol;Acc:70552]	2983.35	-0.361228	0.191061	-1.89064	0.0586723	0.306097	0.259391	0.191119	-1.35722	0.17471	0.414825	-0.120234	0.191015	0.629447	0.529057	0.791213	0.0183962	0.191072	0.0962786	0.923299	0.995696	-0.062577	0.190806	-0.327961	0.742941	0.858106	-0.31529	0.190717	-1.65318	0.0982942	0.211478	-0.0711104	0.190687	-0.372917	0.70921	0.838119	-0.20412	0.190603	-1.07091	0.284208	0.463398	-0.250058	0.190259	-1.31431	0.188743	1	-0.00667749
Acsl4	ENSRNOG00000019180	acyl-CoA synthetase long-chain family member 4 [Source:RGD Symbol;Acc:69401]	1507.67	0.308052	0.216609	1.42215	0.154982	0.480456	0.113634	0.216127	-0.525774	0.599045	0.804959	0.547064	0.216555	-2.52621	0.01153	0.0879645	-0.125379	0.216072	-0.580262	0.561738	0.897961	0.25732	0.216058	1.19098	0.233663	0.417158	0.0943547	0.215753	0.437328	0.661873	0.788348	0.346646	0.215731	1.60684	0.108088	0.246197	-0.258632	0.216394	-1.19519	0.232012	0.404366	-0.0449353	0.215536	-0.208482	0.834853	1	0.0493312
Acsl5	ENSRNOG00000016265	acyl-CoA synthetase long-chain family member 5 [Source:RGD Symbol;Acc:69402]	797.682	-0.19595	0.270337	-0.724835	0.468553	0.766035	0.570217	0.269747	-2.1139	0.0345242	0.151486	0.491189	0.269652	-1.82157	0.0685205	0.268364	-0.116922	0.26906	-0.434555	0.663885	0.939977	-0.0132304	0.268761	-0.0492274	0.960738	0.978216	-0.475573	0.26912	-1.76714	0.077204	0.176319	0.0211589	0.268299	0.0788632	0.937141	0.969386	-0.297547	0.269337	-1.10474	0.269273	0.446422	-0.0179229	0.268114	-0.0668478	0.946703	1	-0.107874
Acsl6	ENSRNOG00000026745	acyl-CoA synthetase long-chain family member 6 [Source:RGD Symbol;Acc:69403]	1760.89	0.0725484	0.184627	0.392945	0.69436	0.893915	0.234126	0.184199	-1.27105	0.20371	0.45251	0.235445	0.184637	-1.27518	0.202247	0.493324	0.0712292	0.184209	0.386677	0.698995	0.948184	-0.115173	0.18366	-0.627102	0.530592	0.703852	-0.0756934	0.183687	-0.412079	0.680281	0.80097	-0.120502	0.18356	-0.656472	0.51152	0.693702	-0.385101	0.184037	-2.09252	0.0363919	0.102196	-0.236859	0.183093	-1.29365	0.195785	1	-0.273606
Acsm1	NA	NA	1.38287	0	0.101493	0	1	NA	0.00884027	0.101506	-0.087091	0.930599	NA	0.100115	0.101462	-0.986721	0.323779	NA	-0.0913813	0.101476	-0.900523	0.367842	NA	0.00890421	0.101594	0.0876448	0.930159	NA	-0.055876	0.101794	-0.548913	0.583065	NA	0.0726382	0.101744	0.713932	0.475269	NA	-0.0559809	0.101636	-0.550796	0.581773	NA	-0.000211371	0.101937	-0.00207354	0.998346	1	0.0559399
Acsm3	ENSRNOG00000032246	acyl-CoA synthetase medium-chain family member 3 [Source:RGD Symbol;Acc:62086]	9.81568	-0.459635	0.38234	-1.20216	0.2293	NA	0	0.380484	0	1	1	-0.419179	0.381775	1.09797	0.272216	0.573552	-0.0306403	0.379918	-0.0806499	0.93572	0.996876	-0.599392	0.383125	-1.56448	0.117704	NA	-0.805137	0.385148	-2.09046	0.0365764	0.0983884	-0.549674	0.384074	-1.43117	0.152382	NA	0.278184	0.384133	0.724187	0.468951	0.643073	0.623687	0.386934	1.61187	0.10699	1	0.19593
Acsm4	ENSRNOG00000014726	acyl-CoA synthetase medium-chain family member 4 [Source:RGD Symbol;Acc:727928]	2.75725	-0.0385354	0.233147	-0.165283	0.868721	NA	-0.0369232	0.232964	0.158493	0.874068	NA	-0.0762971	0.232559	0.328076	0.742854	NA	0	0.232375	0	1	NA	-0.0890572	0.233637	-0.381177	0.703072	NA	-0.0452985	0.234906	-0.192837	0.847087	NA	-0.145616	0.234377	-0.621289	0.534409	NA	0.00581918	0.234011	0.0248671	0.980161	NA	0.0125823	0.235766	0.0533678	0.957439	1	-0.00683548
Acsm5	ENSRNOG00000031211	acyl-CoA synthetase medium-chain family member 5 [Source:RGD Symbol;Acc:1309578]	31.6519	-2.07716	0.454556	-4.56964	4.88566e-06	0.00113131	0.936346	0.453685	-2.06387	0.0390303	0.163198	-2.02336	0.454314	4.45367	8.44147e-06	0.000404082	0.882554	0.453442	1.94635	0.0516132	0.421272	-0.210294	0.455291	-0.46189	0.64416	0.790809	-1.09903	0.454399	-2.41866	0.015578	0.0496883	-0.732028	0.453914	-1.6127	0.10681	0.244128	1.11295	0.456101	2.44013	0.014682	0.0488395	0.134824	0.455946	0.295701	0.767458	1	-0.0476056
Acss1	ENSRNOG00000007102	acyl-CoA synthetase short-chain family member 1 [Source:RGD Symbol;Acc:1306246]	585.266	-0.46558	0.36733	-1.26747	0.204987	0.544267	0.773963	0.367043	-2.10864	0.0349755	0.152739	0.125474	0.366935	-0.341953	0.732386	0.907987	0.182909	0.366648	0.498868	0.617872	0.918058	0.315939	0.366449	0.862164	0.388597	0.579096	-0.906718	0.366557	-2.47361	0.0133757	0.0437738	-0.116459	0.366276	-0.317954	0.75052	0.863498	-0.283375	0.366498	-0.773195	0.439407	0.616939	0.157764	0.365723	0.431374	0.666196	1	0.448693
Acss2	ENSRNOG00000018755	acyl-CoA synthetase short-chain family member 2 [Source:RGD Symbol;Acc:1305489]	929.938	-0.232418	0.188419	-1.23352	0.217382	0.554879	-0.00420975	0.188835	0.0222932	0.982214	0.998788	-0.26141	0.188777	1.38475	0.166128	0.444966	0.0247819	0.189193	0.130987	0.895785	0.991967	0.324999	0.189008	1.7195	0.0855235	0.203999	0.218492	0.18803	1.16201	0.245233	0.409153	0.169102	0.188409	0.897525	0.369439	0.565979	0.272081	0.187971	1.44746	0.147768	0.295248	-0.178829	0.187581	-0.953341	0.340417	1	0.110717
Acss3	ENSRNOG00000004448	acyl-CoA synthetase short-chain family member 3 [Source:RGD Symbol;Acc:1307051]	6.1563	0.0384308	0.315878	0.121663	0.903166	NA	-0.0387085	0.315949	0.122515	0.902491	0.966709	0.049956	0.31531	-0.158434	0.874115	0.970227	-0.0502337	0.315381	-0.159279	0.873449	NA	-0.132105	0.316923	-0.416835	0.676799	NA	-0.333706	0.319115	-1.04573	0.295688	NA	-0.19895	0.318197	-0.625242	0.531812	NA	-0.225147	0.31737	-0.709414	0.478068	NA	0.14699	0.320598	0.458488	0.646602	1	0.24031
Acta1	ENSRNOG00000017786	actin, alpha 1, skeletal muscle [Source:RGD Symbol;Acc:2025]	935.216	-0.0542467	0.182627	-0.297036	0.766439	0.924361	-0.34007	0.183335	1.85491	0.0636096	0.223249	-0.173014	0.183069	0.945076	0.34462	0.64804	-0.221302	0.183776	-1.2042	0.228514	0.686601	0.705923	0.184831	3.81928	0.000133841	0.000956993	0.705005	0.182744	3.85788	0.000114373	0.000701139	0.724336	0.183501	3.94732	7.90324e-05	0.000622254	0.954105	0.183569	5.19752	2.01966e-07	2.34228e-06	0.194852	0.183686	1.06079	0.288785	1	0.340987
Acta2	ENSRNOG00000058039	actin, alpha 2, smooth muscle, aorta [Source:RGD Symbol;Acc:621676]	19.4073	0.19256	0.460853	0.417834	0.676069	0.884142	-0.360477	0.460785	0.782311	0.434032	0.685259	-0.465311	0.460551	1.01034	0.312335	0.615744	0.297394	0.460478	0.645836	0.518385	0.881023	0.410029	0.460642	0.890124	0.373399	0.564057	0.175633	0.46099	0.380991	0.70321	0.81831	-0.0164781	0.460622	-0.0357737	0.971463	0.985718	0.0491088	0.460864	0.106558	0.915139	0.95515	0.0660359	0.460999	0.143245	0.886097	1	0.594873
Actb	ENSRNOG00000034254	actin, beta [Source:RGD Symbol;Acc:628837]	60904.5	0.203515	0.120061	1.6951	0.0900573	0.371779	-0.276875	0.120066	2.30602	0.0211095	0.110316	-0.0579088	0.120092	0.482205	0.62966	0.853551	-0.0154509	0.120097	-0.128654	0.897631	0.992253	-1.134	0.120019	-9.44847	3.43833e-21	2.95721e-19	-0.553366	0.119981	-4.61212	3.98584e-06	3.46527e-05	-0.903187	0.12001	-7.52593	5.23476e-14	1.88721e-12	-0.781541	0.12002	-6.51178	7.42653e-11	1.43727e-09	-0.02466	0.11994	-0.205603	0.837101	1	-0.303758
Actbl2	#N/A	#N/A	0.248406	0	0.0998606	0	1	NA	0	0.0998606	0	1	NA	0	0.0998606	0	1	NA	0	0.0998606	0	1	NA	0	0.0998606	0	1	NA	0	0.0998606	0	1	NA	0	0.0998606	0	1	NA	-0.14633	0.0998606	-1.46534	0.142828	NA	-0.154518	0.0998606	-1.54734	0.121782	1	0
Actc1	ENSRNOG00000008536	actin, alpha, cardiac muscle 1 [Source:RGD Symbol;Acc:2026]	4.61615	-0.0633237	0.253684	-0.249616	0.802884	NA	0.437006	0.25461	-1.71638	0.0860933	NA	-0.041723	0.253324	0.164702	0.869179	0.967991	0.415406	0.254251	1.63384	0.102292	NA	0.407747	0.25515	1.59807	0.110027	NA	-0.149562	0.25532	-0.585781	0.558023	NA	0.00890538	0.254668	0.0349686	0.972105	NA	-0.0329946	0.254545	-0.129622	0.896866	NA	0.0532434	0.256178	0.207837	0.835356	1	0.120303
Actg1	ENSRNOG00000036701	actin, gamma 1 [Source:RGD Symbol;Acc:1304556]	5615.22	-0.134251	0.164263	-0.817295	0.41376	0.72414	-0.0888394	0.164449	0.540224	0.589043	0.798235	0.0689296	0.16424	-0.419689	0.674713	0.881019	-0.29202	0.164426	-1.776	0.0757334	0.491441	-1.55162	0.163707	-9.47801	2.59178e-21	2.29468e-19	-1.53754	0.163327	-9.41391	4.78019e-21	3.03764e-19	-1.22282	0.163334	-7.48665	7.06559e-14	2.50169e-12	-1.41213	0.163478	-8.63799	5.72091e-18	2.32764e-16	-0.00883557	0.162537	-0.0543603	0.956648	1	0.0747624
Actg2	ENSRNOG00000029401	actin, gamma 2, smooth muscle, enteric [Source:RGD Symbol;Acc:2027]	27.0871	0.754367	0.385518	1.95676	0.0503754	0.283345	-0.698186	0.38566	1.81037	0.0702392	0.237552	0.361676	0.384856	-0.939769	0.347336	0.650172	-0.305494	0.384998	-0.793495	0.427489	0.83637	0.00139179	0.385127	0.00361386	0.997117	0.998776	0.126265	0.387249	0.326058	0.74438	0.848126	0.212764	0.386089	0.551076	0.581581	0.746953	-0.216833	0.385312	-0.562747	0.573607	0.730558	0.411269	0.387043	1.06259	0.287967	1	0.573312
Actl6a	ENSRNOG00000011553	actin-like 6A [Source:RGD Symbol;Acc:1307747]	200.52	-0.443316	0.454218	-0.975999	0.329065	0.660205	0.558424	0.454173	-1.22954	0.21887	0.469245	-0.317177	0.454235	0.698265	0.485011	0.761671	0.432284	0.454191	0.951768	0.341214	0.777682	-0.369617	0.453862	-0.814382	0.415426	0.604051	-0.704213	0.453968	-1.55124	0.120844	0.246085	-0.804565	0.453951	-1.77236	0.0763346	0.190282	-0.407446	0.453901	-0.897653	0.36937	0.551417	-0.14655	0.45365	-0.323045	0.746661	1	-0.223828
Actl6b	ENSRNOG00000001408	actin-like 6B [Source:RGD Symbol;Acc:1307763]	1976.03	-0.298653	0.156112	-1.91307	0.0557388	0.297892	-0.00173028	0.156527	0.0110541	0.99118	1	-0.249751	0.156281	1.59809	0.110023	0.353612	-0.0506326	0.156696	-0.323127	0.746599	0.958569	-0.2909	0.155956	-1.86527	0.0621429	0.16064	-0.505213	0.155218	-3.25485	0.00113451	0.00530584	-0.133441	0.15568	-0.857148	0.391363	0.58687	-0.0891565	0.15536	-0.573869	0.566057	0.724646	0.117404	0.154463	0.760078	0.447208	1	0.216043
Actl7b	ENSRNOG00000016621	actin-like 7b [Source:RGD Symbol;Acc:1305655]	1.79722	0	0.111168	0	1	NA	0.101455	0.111228	-0.912136	0.361697	NA	0	0.11109	0	1	NA	0.101393	0.11115	0.912214	0.361656	NA	0.0786366	0.111328	0.706351	0.47997	NA	0	0.111461	0	1	NA	0	0.111372	0	1	NA	-0.0599265	0.111318	-0.538338	0.590344	NA	-0.0601615	0.11161	-0.539031	0.589865	1	-0.0229321
Actn1	ENSRNOG00000056756	actinin, alpha 1 [Source:RGD Symbol;Acc:70907]	709.894	-0.0741337	0.237785	-0.311767	0.755218	0.919466	-0.504442	0.238464	2.11538	0.0343977	0.151294	-0.755032	0.238756	3.16236	0.00156498	0.0223092	0.176457	0.239432	0.73698	0.461134	0.85436	1.54923	0.241487	6.4154	1.40455e-10	3.07493e-09	1.96767	0.239986	8.19911	2.42182e-16	9.13034e-15	1.34705	0.241187	5.58511	2.33559e-08	3.69513e-07	1.97114	0.240116	8.2091	2.22848e-16	7.69542e-15	-0.0706645	0.242293	-0.291649	0.770555	1	0.0860087
Actn2	ENSRNOG00000017833	actinin alpha 2 [Source:RGD Symbol;Acc:1308097]	389.072	-0.176842	0.402399	-0.439469	0.660322	0.877892	-1.04408	0.403278	2.58898	0.00962602	0.0642839	-1.20678	0.403196	2.99305	0.00276208	0.0330553	-0.014137	0.404072	-0.0349864	0.972091	1	0.636596	0.404333	1.57443	0.115387	0.253399	1.04042	0.402699	2.58363	0.0097768	0.0337237	0.786061	0.40422	1.94464	0.0518186	0.142887	1.1545	0.402744	2.86659	0.00414925	0.0172171	-0.0627667	0.403043	-0.155732	0.876244	1	0.640251
Actn3	ENSRNOG00000019745	actinin alpha 3 [Source:RGD Symbol;Acc:621792]	9.90135	-0.17873	0.355946	-0.502127	0.615578	NA	0.0932799	0.355686	-0.262254	0.793126	0.919766	-0.0959428	0.355628	0.269784	0.787326	0.931739	0.0104925	0.355368	0.0295258	0.976445	1	-0.195715	0.357194	-0.547923	0.583745	NA	-0.16873	0.358011	-0.471298	0.637428	0.769658	-0.172089	0.357819	-0.48094	0.630559	NA	-0.43309	0.358376	-1.20848	0.226863	0.397663	-0.443091	0.360433	-1.22933	0.218949	1	-0.120265
Actn4	ENSRNOG00000020433	actinin alpha 4 [Source:RGD Symbol;Acc:61816]	3451.23	0.148469	0.235182	0.631294	0.527849	0.805452	-0.329993	0.23523	1.40285	0.160661	0.393847	-0.526145	0.235412	2.235	0.0254176	0.146324	0.344621	0.23546	1.46361	0.143301	0.607298	1.22363	0.235664	5.19228	2.07739e-07	2.78861e-06	1.81052	0.235565	7.68586	1.51968e-14	4.60309e-13	0.803481	0.235649	3.40965	0.00065047	0.00391916	1.4213	0.235571	6.03341	1.60532e-09	2.61432e-08	-0.240756	0.235954	-1.02035	0.307561	1	-0.256899
Actr10	ENSRNOG00000007504	actin-related protein 10 homolog (S. cerevisiae) [Source:RGD Symbol;Acc:1306515]	2347.68	0.25455	0.135908	1.87296	0.0610743	0.311543	0.0913511	0.135242	-0.675462	0.499382	0.733081	0.382158	0.135971	-2.81058	0.00494529	0.0500385	-0.0362566	0.135306	-0.26796	0.78873	0.971412	-0.467761	0.13439	-3.48062	0.00050026	0.00300358	-0.619048	0.133917	-4.62264	3.78896e-06	3.30575e-05	-0.483748	0.134011	-3.60977	0.000306472	0.00204502	-0.805301	0.134982	-5.96601	2.43132e-09	3.86253e-08	0.0682968	0.132976	0.513603	0.60753	1	0.059936
Actr1a	ENSRNOG00000019725	ARP1 actin-related protein 1 homolog A, centractin alpha (yeast) [Source:RGD Symbol;Acc:1307025]	5659.73	-0.0705304	0.122134	-0.577485	0.563612	0.825703	0.111277	0.122097	-0.911382	0.362094	0.622404	-0.107502	0.122255	0.879332	0.379221	0.679302	0.148249	0.122218	1.21299	0.225134	0.682433	0.115334	0.121985	0.945479	0.344414	0.537118	-0.139762	0.121755	-1.1479	0.251012	0.415365	-0.0965439	0.121921	-0.791854	0.428446	0.622345	-0.158152	0.121881	-1.2976	0.194425	0.358331	-0.0889205	0.121501	-0.731848	0.464261	1	0.143819
Actr1b	ENSRNOG00000016789	ARP1 actin-related protein 1 homolog B, centractin beta (yeast) [Source:RGD Symbol;Acc:1307380]	7339.91	0.0759266	0.10023	0.757523	0.448737	0.750808	0.288251	0.0999521	-2.88389	0.003928	0.0341972	0.237027	0.100237	-2.36466	0.0180464	0.117129	0.127151	0.0999589	1.27203	0.203363	0.662409	-0.228902	0.0995833	-2.2986	0.0215275	0.070381	-0.381953	0.0995725	-3.83593	0.000125088	0.000757784	-0.43948	0.099514	-4.41626	1.00424e-05	9.88682e-05	-0.505066	0.0998548	-5.058	4.23678e-07	4.67183e-06	-0.0471854	0.0991946	-0.475685	0.634299	1	-0.1352
Actr2	ENSRNOG00000004959	ARP2 actin-related protein 2 homolog (yeast) [Source:RGD Symbol;Acc:1310826]	5753.23	0.0498903	0.133089	0.374865	0.707761	0.90029	0.266581	0.132879	-2.00619	0.0448355	0.179107	0.198636	0.133101	-1.49237	0.135602	0.396347	0.117836	0.132892	0.886707	0.375237	0.804332	-0.198721	0.132579	-1.49889	0.133901	0.283108	-0.384626	0.132539	-2.90197	0.00370819	0.0147229	-0.270269	0.132552	-2.03897	0.0414526	0.120972	-0.419921	0.132784	-3.16243	0.00156456	0.00742987	0.0145953	0.132234	0.110375	0.912112	1	-0.080677
Actr3	ENSRNOG00000003206	ARP3 actin-related protein 3 homolog (yeast) [Source:RGD Symbol;Acc:71024]	3180.65	-0.16673	0.14304	-1.16562	0.243767	0.583316	0.626467	0.1425	-4.39625	1.10138e-05	0.000384874	0.350253	0.142673	-2.45493	0.0140913	0.100051	0.109483	0.142133	0.77029	0.441128	0.844838	-0.393466	0.141496	-2.78076	0.00542313	0.0228481	-0.96033	0.141805	-6.77217	1.26867e-11	2.61979e-10	-0.484401	0.141432	-3.42496	0.00061488	0.00374078	-0.843806	0.141991	-5.94269	2.80375e-09	4.40314e-08	-0.0502067	0.140747	-0.356717	0.721304	1	-0.0596025
Actr3b	ENSRNOG00000031855	ARP3 actin-related protein 3 homolog B (yeast) [Source:RGD Symbol;Acc:1565759]	1251.01	0.130084	0.23746	0.547813	0.58382	0.836606	-0.206364	0.237576	0.868624	0.385053	0.641058	0.112939	0.237746	-0.475042	0.634757	0.855874	-0.18922	0.237862	-0.795503	0.426321	0.836121	-1.03213	0.23651	-4.36399	1.27711e-05	0.000116586	-0.933967	0.235485	-3.96614	7.30454e-05	0.000473198	-0.822292	0.235874	-3.48615	0.000490019	0.00305256	-1.13403	0.236215	-4.80086	1.57987e-06	1.5707e-05	-0.0699829	0.234228	-0.298781	0.765107	1	0.108203
Actr5	ENSRNOG00000023989	ARP5 actin-related protein 5 homolog (yeast) [Source:RGD Symbol;Acc:1307958]	195.832	-0.253292	0.385194	-0.657571	0.510814	0.795077	-0.171833	0.386088	0.445063	0.656274	0.842379	-0.966832	0.387385	2.49579	0.0125676	0.0936114	0.541706	0.388271	1.39517	0.162963	0.627228	-0.622343	0.385086	-1.61611	0.10607	0.238593	-0.0188483	0.384439	-0.0490281	0.960897	0.978599	-0.886392	0.386474	-2.29354	0.021817	0.0735262	0.120601	0.384452	0.313697	0.753751	0.859226	-0.113843	0.383695	-0.296701	0.766695	1	-0.431661
Actr6	ENSRNOG00000007875	ARP6 actin-related protein 6 homolog (yeast) [Source:RGD Symbol;Acc:1304609]	761.255	0.415678	0.201629	2.0616	0.0392462	0.252029	0.428317	0.199432	-2.14769	0.0317386	0.14325	0.417704	0.201996	-2.06788	0.0386511	0.189236	0.426292	0.199803	2.13356	0.0328787	0.352024	0.382232	0.198917	1.92157	0.0546604	0.145672	0.051445	0.199092	0.258399	0.796099	0.881209	0.130329	0.199653	0.652777	0.5139	0.695876	-0.530945	0.200838	-2.64364	0.00820187	0.030355	-0.166712	0.19829	-0.840748	0.400489	1	-0.09753
Actr8	ENSRNOG00000015280	ARP8 actin-related protein 8 homolog (yeast) [Source:RGD Symbol;Acc:1311878]	1106.9	0.531189	0.222334	2.38915	0.0168874	0.161414	0.189882	0.220999	-0.859198	0.390231	0.645263	0.63064	0.222429	-2.83524	0.00457908	0.0475259	0.0904303	0.221094	0.409012	0.682531	0.944683	-0.0139277	0.220515	-0.0631598	0.949639	0.972827	-0.102431	0.220327	-0.464905	0.641999	0.773133	-0.144979	0.220325	-0.658021	0.510525	0.692821	-0.803757	0.221694	-3.62552	0.00028838	0.00172518	-0.170137	0.219681	-0.774472	0.438652	1	-0.101378
Actrt2	ENSRNOG00000012586	actin-related protein T2 [Source:RGD Symbol;Acc:1359657]	0	NA	NA	NA	NA	NA	NA	NA	NA	NA	NA	NA	NA	NA	NA	NA	NA	NA	NA	NA	NA	NA	NA	NA	NA	NA	NA	NA	NA	NA	NA	NA	NA	NA	NA	NA	NA	NA	NA	NA	NA	NA	NA	NA	NA	NA	NA
Actrt3	ENSRNOG00000027908	actin-related protein T3 [Source:RGD Symbol;Acc:1561457]	4.78477	0.167656	0.214427	0.781878	0.434286	NA	-0.193115	0.214416	0.900657	0.367771	NA	-0.0257992	0.213982	0.120567	0.904034	0.984048	0	0.21397	0	1	NA	-0.195394	0.214647	-0.910302	0.362663	NA	0.0203758	0.215382	0.0946034	0.92463	NA	-0.0576482	0.214803	-0.268377	0.78841	NA	0.0268968	0.214574	0.125349	0.900247	NA	0.174177	0.215528	0.808139	0.419011	1	-0.0226545
Acvr1	ENSRNOG00000005033	activin A receptor, type I [Source:RGD Symbol;Acc:620200]	102.582	-0.175643	0.458548	-0.383043	0.701688	0.897374	1.02996	0.458051	-2.24858	0.0245394	0.122068	0.460921	0.458277	-1.00577	0.314527	0.618177	0.393399	0.457777	0.859369	0.390137	0.816186	-0.626088	0.457256	-1.36923	0.170928	0.337069	-1.4136	0.457689	-3.08856	0.00201127	0.00873173	-0.892422	0.457392	-1.95111	0.0510441	0.141484	-1.24145	0.457794	-2.71181	0.00669164	0.0256407	-0.0034944	0.456919	-0.00764774	0.993898	1	-0.24245
Acvr1b	ENSRNOG00000006934	activin A receptor, type IB [Source:RGD Symbol;Acc:735207]	111.008	-0.440833	0.434386	-1.01484	0.310182	0.64138	0.0162138	0.43548	-0.0372322	0.9703	0.994565	-0.189046	0.434189	0.435399	0.663273	0.873259	-0.235573	0.435284	-0.541195	0.588373	0.906929	-1.2788	0.432918	-2.95391	0.00313772	0.0146156	-1.31422	0.431956	-3.04248	0.00234637	0.00999519	-0.949358	0.431898	-2.19811	0.0279414	0.0894962	-1.30108	0.431334	-3.0164	0.00255798	0.0114132	-0.42769	0.428864	-0.997263	0.318637	1	0.0192042
Acvr1c	ENSRNOG00000004828	activin A receptor, type IC [Source:RGD Symbol;Acc:621789]	206.054	0.962731	0.390372	2.46619	0.0136559	0.143985	-0.292772	0.388653	0.7533	0.45127	0.698242	0.475321	0.391473	-1.21419	0.224677	0.517784	0.194638	0.389762	0.499376	0.617515	0.918044	-0.38377	0.388266	-0.98842	0.322947	0.51573	0.0512285	0.387285	0.132276	0.894766	0.939827	-0.420033	0.388454	-1.08129	0.279567	0.472375	-0.995824	0.389934	-2.55383	0.0106545	0.0375926	-0.0843223	0.386841	-0.217976	0.827448	1	-0.142226
Acvr2a	ENSRNOG00000005334	activin A receptor, type IIA [Source:RGD Symbol;Acc:70911]	285.174	0.00736322	0.331559	0.0222078	0.982282	0.999674	-1.08516	0.336068	3.22898	0.00124233	0.0145381	-0.775067	0.334727	2.31552	0.0205845	0.127428	-0.302728	0.339183	-0.89252	0.372114	0.802248	-1.1944	0.335356	-3.56158	0.000368632	0.00230462	-0.816403	0.328716	-2.48362	0.0130056	0.0427896	-0.421078	0.333921	-1.26101	0.207305	0.387742	-0.887848	0.329564	-2.69401	0.00705989	0.0267261	-0.0640812	0.326699	-0.196148	0.844495	1	0.707163
Acvr2b	ENSRNOG00000014477	activin A receptor, type IIB [Source:RGD Symbol;Acc:2028]	665.155	0.316326	0.274166	1.15378	0.248592	0.587115	0.035376	0.273559	-0.129317	0.897107	0.96386	0.591595	0.274046	-2.15874	0.0308701	0.165388	-0.239892	0.273439	-0.877317	0.380315	0.80753	0.309987	0.273615	1.13293	0.257244	0.444656	0.519679	0.273397	1.90082	0.0573251	0.139914	0.236455	0.272686	0.867131	0.38587	0.581405	-0.0140842	0.274124	-0.051379	0.959024	0.97889	-0.217437	0.273355	-0.795438	0.426359	1	-0.245068
Acvrl1	ENSRNOG00000028713	activin A receptor type II-like 1 [Source:RGD Symbol;Acc:2029]	94.6796	-0.378502	0.433517	-0.873096	0.382611	0.702894	0.358997	0.433519	-0.828099	0.407614	0.660423	-1.6911	0.436766	3.87185	0.000108012	0.00304914	1.67159	0.436769	3.82717	0.000129624	0.0213067	0.482942	0.43338	1.11436	0.265124	0.45292	0.127938	0.433287	0.295273	0.767786	0.863287	-1.52422	0.43622	-3.49416	0.000475562	0.00297195	0.481621	0.433218	1.11173	0.266255	0.442847	-0.0248187	0.432988	-0.0573195	0.954291	1	-0.00399255
Acy1	ENSRNOG00000011189	aminoacylase 1 [Source:RGD Symbol;Acc:2030]	745.328	-0.872811	0.243393	-3.58601	0.000335774	0.0174327	0.76388	0.243574	-3.13614	0.00171189	0.0185528	-0.0452843	0.241915	0.187191	0.851511	0.961434	-0.0636463	0.242096	-0.262897	0.79263	0.971412	-0.476818	0.240973	-1.97871	0.0478482	0.132173	-1.13794	0.242048	-4.70128	2.58539e-06	2.34986e-05	-0.233072	0.240677	-0.968402	0.332844	0.529078	-0.0579854	0.241014	-0.240589	0.809874	0.893914	0.207139	0.239655	0.864323	0.38741	1	-0.102763
Acy3	ENSRNOG00000017901	aminoacylase 3 [Source:RGD Symbol;Acc:1305394]	86.7163	-1.98402	0.459909	-4.31394	1.60371e-05	0.00254606	0.718108	0.460274	-1.56018	0.118718	0.326352	-2.1784	0.460057	4.73506	2.1899e-06	0.000135177	0.912484	0.460416	1.98187	0.0474941	0.404158	-0.57686	0.459776	-1.25466	0.209604	0.387627	-1.74849	0.459824	-3.80252	0.00014323	0.000853016	-1.98817	0.45997	-4.32238	1.54352e-05	0.00014446	0.220127	0.459282	0.479285	0.631736	0.774775	-0.0154041	0.459194	-0.0335461	0.973239	1	0.453522
Acyp1	ENSRNOG00000006744	acylphosphatase 1, erythrocyte (common) type [Source:RGD Symbol;Acc:1311327]	1174.41	0.0631762	0.184184	0.343005	0.731595	0.909263	0.0895615	0.183953	-0.486871	0.62635	0.823921	0.266455	0.18415	-1.44695	0.147912	0.417551	-0.113718	0.183919	-0.618304	0.536375	0.886094	0.916299	0.18477	4.95914	7.08061e-07	8.52576e-06	1.39058	0.185331	7.50324	6.22615e-14	1.7405e-12	1.09336	0.184411	5.92892	3.04928e-09	5.51451e-08	1.31238	0.185851	7.06149	1.64727e-12	3.94322e-11	-0.0150194	0.186986	-0.0803233	0.93598	1	-0.563842
Acyp2	ENSRNOG00000042419	acylphosphatase 2, muscle type [Source:RGD Symbol;Acc:1595836]	3752.67	-0.31046	0.174964	-1.77442	0.0759929	0.34016	0.1496	0.175028	-0.85472	0.392706	0.647834	0.0788341	0.174878	-0.450795	0.652137	0.866805	-0.239694	0.174942	-1.37013	0.170645	0.634924	1.05191	0.175392	5.99751	2.0037e-09	3.76921e-08	0.889778	0.175225	5.07791	3.81611e-07	4.09087e-06	1.16147	0.17509	6.63354	3.2772e-11	7.97588e-10	1.12915	0.175206	6.44472	1.15817e-10	2.18046e-09	-0.0710839	0.175467	-0.405113	0.685395	1	0.0125352
Ada	ENSRNOG00000010265	adenosine deaminase [Source:RGD Symbol;Acc:2031]	88.2564	0.294356	0.460967	0.638563	0.523107	0.801978	-0.103675	0.460958	0.224912	0.822048	0.932345	0.33821	0.460972	-0.733688	0.463139	0.747211	-0.147529	0.460963	-0.320044	0.748935	0.959716	-0.433685	0.460934	-0.940883	0.346765	0.539199	-0.0392232	0.460921	-0.0850975	0.932184	0.962476	-0.284623	0.460917	-0.617515	0.536895	0.714988	-0.355727	0.460949	-0.771726	0.440277	0.617876	-0.0221474	0.460903	-0.0480522	0.961675	1	-0.290787
Adad1	ENSRNOG00000017246	adenosine deaminase domain containing 1 (testis specific) [Source:RGD Symbol;Acc:1359309]	1.28103	0.0222581	0.101464	0.219368	0.826363	NA	-0.107306	0.101428	1.05795	0.29008	NA	-0.0850969	0.101336	0.839751	0.401048	NA	0	0.101299	0	1	NA	-0.00646043	0.10148	-0.0636622	0.949239	NA	0.107522	0.101726	1.05697	0.290526	NA	0	0.101586	0	1	NA	0.0624979	0.101562	0.615366	0.538313	NA	-0.0227657	0.101824	-0.223579	0.823085	1	-0.00667643
Adal	ENSRNOG00000012166	adenosine deaminase-like [Source:RGD Symbol;Acc:1359517]	76.1988	1.01617	0.460388	2.2072	0.0273003	0.208846	-0.769338	0.460316	1.67133	0.0946571	0.285875	0.598375	0.460511	-1.29937	0.193816	0.482637	-0.351547	0.46044	-0.763503	0.445164	0.846779	-0.8167	0.460268	-1.7744	0.0759971	0.186523	-0.101933	0.459986	-0.221601	0.824624	0.897263	-0.330752	0.460148	-0.718795	0.472267	0.661302	-0.919606	0.460347	-1.99764	0.0457559	0.121989	0.198495	0.459943	0.431564	0.666059	1	0.054572
Adam10	ENSRNOG00000054257	ADAM metallopeptidase domain 10 [Source:RGD Symbol;Acc:2032]	332.136	-1.08469	0.34133	-3.17784	0.00148379	0.0423373	0.779376	0.34232	-2.27675	0.0228013	0.116065	0.210977	0.337204	-0.625665	0.531535	0.791957	-0.516292	0.338209	-1.52655	0.126873	0.5865	-1.48443	0.335965	-4.41839	9.94367e-06	9.30316e-05	-1.98242	0.33825	-5.8608	4.60641e-09	6.80342e-08	-0.849648	0.333939	-2.54432	0.010949	0.0423373	-1.13044	0.334893	-3.37551	0.000736782	0.00391849	-0.232711	0.331737	-0.701493	0.482995	1	-0.281386
Adam11	ENSRNOG00000002753	ADAM metallopeptidase domain 11 [Source:RGD Symbol;Acc:1307515]	418.819	-0.078933	0.375601	-0.210151	0.83355	0.951386	0.00724263	0.375727	-0.0192763	0.984621	0.999758	-0.222277	0.376283	0.590716	0.55471	0.807125	0.150586	0.376409	0.400061	0.689112	0.945951	-1.40323	0.373782	-3.75414	0.000173934	0.00120572	-1.55418	0.372975	-4.16699	3.08642e-05	0.000220576	-1.53306	0.373778	-4.10154	4.10416e-05	0.000346832	-1.43122	0.373529	-3.83163	0.000127298	0.00084237	0.0440266	0.370883	0.118708	0.905507	1	0.14371
Adam15	ENSRNOG00000020590	ADAM metallopeptidase domain 15 [Source:RGD Symbol;Acc:620402]	867.669	0.332098	0.209177	1.58764	0.112368	0.412383	-0.435385	0.209393	2.07927	0.0375924	0.159768	-0.148646	0.21046	0.706292	0.480007	0.757602	0.0453592	0.210674	0.215305	0.82953	0.978176	-0.406967	0.209101	-1.94628	0.0516216	0.139696	-0.350022	0.206994	-1.69097	0.0908416	0.19888	-0.361102	0.208866	-1.72887	0.0838328	0.20369	-0.518759	0.208489	-2.48819	0.0128395	0.0437253	0.163361	0.206298	0.791868	0.428437	1	0.37844
Adam17	ENSRNOG00000060694	ADAM metallopeptidase domain 17 [Source:RGD Symbol;Acc:620404]	235.694	0.431276	0.33459	1.28897	0.197409	0.532482	0.434506	0.332116	-1.30829	0.190773	0.436869	0.592324	0.334615	-1.77017	0.0766996	0.286397	0.273458	0.332142	0.823318	0.410327	0.827706	0.205448	0.331225	0.620266	0.535083	0.707159	0.0172426	0.331692	0.0519837	0.958542	0.97725	0.221789	0.33186	0.668323	0.503927	0.688158	-0.385338	0.333998	-1.15371	0.248617	0.423161	0.028696	0.331094	0.0866705	0.930933	1	-0.246301
Adam19	ENSRNOG00000042980	ADAM metallopeptidase domain 19 [Source:RGD Symbol;Acc:1585017]	201.989	0.557288	0.382307	1.4577	0.144924	0.466212	-0.119456	0.381216	0.313356	0.75401	0.898021	0.835978	0.382147	-2.18758	0.0286999	0.158595	-0.398147	0.381056	-1.04485	0.296091	0.74905	0.0114066	0.381068	0.0299332	0.97612	0.987271	0.540536	0.380739	1.4197	0.155695	0.29502	0.420161	0.38001	1.10566	0.268875	0.460665	0.15011	0.382958	0.391975	0.695077	0.819677	0.166862	0.381393	0.437506	0.661745	1	-0.409673
Adam1a	NA	NA	51.6001	0.35372	0.443705	0.797196	0.425337	0.732059	-0.546317	0.443566	1.23165	0.218081	0.468362	0.132935	0.443494	-0.299744	0.764372	0.922186	-0.325532	0.443355	-0.734246	0.462799	0.855893	0.0362636	0.443379	0.0817891	0.934814	0.967434	0.43351	0.444074	0.97621	0.32896	0.500361	0.425438	0.443734	0.958769	0.337675	0.533476	0.387193	0.443488	0.873064	0.382628	0.564239	0.307403	0.443858	0.692571	0.488579	1	0.149071
Adam2	#N/A	#N/A	0.22998	0	0.0998606	0	1	NA	0	0.0998606	0	1	NA	0	0.0998606	0	1	NA	0	0.0998606	0	1	NA	0	0.0998606	0	1	NA	0	0.0998606	0	1	NA	-0.0624697	0.0998606	-0.625569	0.531598	NA	0	0.0998606	0	1	NA	0	0.0998606	0	1	1	0
Adam23	ENSRNOG00000012424	ADAM metallopeptidase domain 23 [Source:RGD Symbol;Acc:1305739]	391.188	-0.182534	0.2802	-0.651441	0.514762	0.796383	-0.451328	0.282427	1.59804	0.110035	0.312281	-0.0550728	0.280322	0.196463	0.844248	0.958265	-0.578789	0.282548	-2.04846	0.0405145	0.383317	-0.62589	0.281491	-2.22349	0.026183	0.082273	-0.358132	0.278272	-1.28699	0.198099	0.351947	0.0155545	0.278901	0.0557705	0.955525	0.979523	-0.408319	0.278352	-1.46691	0.142399	0.287481	-0.23272	0.276409	-0.841941	0.399821	1	0.18357
Adam30	ENSRNOG00000019044	ADAM metallopeptidase domain 30 [Source:RGD Symbol;Acc:1594713]	0	NA	NA	NA	NA	NA	NA	NA	NA	NA	NA	NA	NA	NA	NA	NA	NA	NA	NA	NA	NA	NA	NA	NA	NA	NA	NA	NA	NA	NA	NA	NA	NA	NA	NA	NA	NA	NA	NA	NA	NA	NA	NA	NA	NA	NA	NA
Adam32	ENSRNOG00000025728	ADAM metallopeptidase domain 32 [Source:RGD Symbol;Acc:735114]	22.0014	-0.0913348	0.412723	-0.221298	0.82486	0.947539	-0.1208	0.412413	0.292912	0.76959	0.906393	-0.606697	0.411602	1.47399	0.140485	0.404642	0.394562	0.411291	0.959325	0.337395	0.774827	0.0810464	0.412447	0.196501	0.844218	0.918907	0.196665	0.413248	0.4759	0.634146	0.766976	-0.258505	0.412018	-0.627413	0.530389	0.710177	0.113665	0.413086	0.275161	0.783193	0.87666	-0.174335	0.41361	-0.421495	0.673394	1	0.00518213
Adam4	ENSRNOG00000038275	a disintegrin and metalloprotease domain 4 [Source:RGD Symbol;Acc:621470]	13.8226	0.13488	0.337163	0.400043	0.689125	0.890713	-0.0841861	0.337278	0.249604	0.802893	0.922885	-0.216985	0.336362	0.645094	0.518866	0.785708	0.267679	0.336478	0.795532	0.426304	0.836121	0.234118	0.337161	0.694381	0.487444	0.66727	0.280067	0.337952	0.828716	0.407265	0.577523	0.00263919	0.337017	0.00783101	0.993752	NA	0.236096	0.33712	0.700332	0.48372	0.655164	0.0909089	0.337909	0.269034	0.787904	1	0.0382376
Adam4l1	NA	NA	10.4013	-0.385995	0.296001	-1.30403	0.192224	NA	0.272576	0.295853	-0.921322	0.356882	0.618501	-0.238158	0.295964	0.804686	0.421001	0.715471	0.124739	0.295815	0.42168	0.673258	0.941996	0.170845	0.296318	0.57656	0.564237	NA	-0.33647	0.296782	-1.13373	0.256909	0.422628	0.0289075	0.296477	0.0975035	0.922327	NA	0.0980396	0.296803	0.330319	0.741159	0.851282	0.0485155	0.297583	0.163032	0.870493	1	0.23474
Adam5	ENSRNOG00000017518	a disintegrin and metallopeptidase domain 5 [Source:RGD Symbol;Acc:621471]	0.032919	0	0.0998606	0	1	NA	0	0.0998606	0	1	NA	0	0.0998606	0	1	NA	0	0.0998606	0	1	NA	0	0.0998606	0	1	NA	0	0.0998606	0	1	NA	0	0.0998606	0	1	NA	0	0.0998606	0	1	NA	0	0.0998606	0	1	1	0
Adam9	ENSRNOG00000017231	ADAM metallopeptidase domain 9 [Source:RGD Symbol;Acc:621473]	357.841	1.12977	0.380906	2.96601	0.00301689	0.0642944	-0.897928	0.379854	2.36387	0.018085	0.099322	0.300762	0.383429	-0.784401	0.432805	0.724501	-0.0689169	0.382387	-0.180228	0.856973	0.983492	-1.87975	0.378358	-4.96817	6.75872e-07	8.14632e-06	-1.24159	0.374759	-3.31302	0.000922932	0.00443065	-2.24251	0.377261	-5.9442	2.77806e-09	5.05513e-08	-2.4787	0.379092	-6.53852	6.21325e-11	1.21198e-09	-0.107339	0.372902	-0.287848	0.773463	1	0.259766
Adamts1	ENSRNOG00000001607	ADAM metallopeptidase with thrombospondin type 1 motif, 1 [Source:RGD Symbol;Acc:621241]	39.0411	-0.420636	0.403541	-1.04236	0.297244	0.632517	0.162934	0.403331	-0.403971	0.686234	0.859205	-0.514515	0.40329	1.27579	0.202029	0.492977	0.256813	0.40308	0.637126	0.524043	0.882298	0.0409915	0.403601	0.101565	0.919102	0.960253	-0.0486909	0.403771	-0.12059	0.904016	0.945508	-0.218203	0.403547	-0.540714	0.588705	0.752198	0.54334	0.403714	1.34585	0.17835	0.337207	0.171394	0.403944	0.424303	0.671345	1	-0.0732517
Adamts10	ENSRNOG00000008857	ADAM metallopeptidase with thrombospondin type 1 motif, 10 [Source:RGD Symbol;Acc:1598320]	130.31	-0.934305	0.455474	-2.05128	0.0402397	0.25488	0.191676	0.455777	-0.420548	0.674085	0.85258	-1.1401	0.455678	2.50197	0.0123503	0.0923662	0.397467	0.455981	0.871675	0.383386	0.810699	-0.810177	0.45536	-1.7792	0.0752065	0.184922	-0.0493942	0.455543	-0.108429	0.913655	0.950831	-0.606338	0.455639	-1.33074	0.183274	0.355393	0.162068	0.455083	0.356129	0.721744	0.83869	-0.722842	0.455152	-1.58813	0.112256	1	-0.952459
Adamts12	ENSRNOG00000018865	ADAM metallopeptidase with thrombospondin type 1 motif, 12 [Source:RGD Symbol;Acc:1307323]	39.0038	-0.690459	0.447768	-1.542	0.123073	0.429998	1.11458	0.448094	-2.48739	0.0128686	0.0778596	0.0462049	0.448289	-0.103069	0.917908	0.988132	0.377919	0.448614	0.842414	0.399556	0.81918	0.366351	0.448881	0.816144	0.414418	0.602738	-0.653742	0.448217	-1.45854	0.144692	0.279499	0.412929	0.448513	0.920661	0.357227	0.554424	0.341519	0.448376	0.76168	0.446251	0.622866	0.304803	0.448824	0.679115	0.497065	1	-0.0944882
Adamts14	ENSRNOG00000000563	ADAM metallopeptidase with thrombospondin type 1 motif, 14 [Source:RGD Symbol;Acc:1308899]	4.01308	-0.0777797	0.112452	-0.691672	0.489143	NA	0.0434148	0.112448	-0.386089	0.699431	NA	-0.0777513	0.112417	0.691635	0.489167	0.764938	0.0433865	0.112413	0.385956	0.699529	NA	0.0434481	0.112489	0.386243	0.699316	NA	-0.0459527	0.112572	-0.408208	0.683121	NA	0	0.112525	0	1	NA	0.0432756	0.112515	0.384621	0.700518	NA	0.0114487	0.112635	0.101644	0.919039	1	0.0459859
Adamts15	ENSRNOG00000009892	ADAM metallopeptidase with thrombospondin type 1 motif, 15 [Source:RGD Symbol;Acc:1309770]	55.6878	-1.20623	0.460248	-2.62083	0.00877169	0.112962	1.27114	0.46026	-2.76178	0.00574867	0.0447927	-0.055132	0.46047	0.11973	0.904697	0.984438	0.120041	0.460482	0.260685	0.794336	0.971967	0.880516	0.460423	1.91241	0.0558239	0.147861	-0.200383	0.460192	-0.435435	0.663247	0.788906	0.632919	0.460465	1.37452	0.16928	0.337212	0.951548	0.460405	2.06676	0.0387566	0.107224	-0.0542979	0.46035	-0.117949	0.906108	1	-0.190239
Adamts18	ENSRNOG00000011575	ADAM metallopeptidase with thrombospondin type 1 motif, 18 [Source:RGD Symbol;Acc:1560118]	13.3261	-0.512221	0.389156	-1.31623	0.188096	0.520934	0.302357	0.388617	-0.778033	0.43655	0.687096	-0.184691	0.389595	0.474059	0.635458	0.856371	-0.0251726	0.389056	-0.0647017	0.948411	0.998016	0.0716246	0.389799	0.183748	0.854211	0.923797	-0.488987	0.390573	-1.25197	0.210579	0.367084	-0.0399067	0.390734	-0.102133	0.918651	NA	-0.0228448	0.391132	-0.0584068	0.953425	0.975663	-0.0460786	0.392544	-0.117385	0.906555	1	0.258255
Adamts19	ENSRNOG00000019577	ADAM metallopeptidase with thrombospondin type 1 motif, 19 [Source:RGD Symbol;Acc:1308359]	11.7973	0	0.370704	0	1	NA	0	0.370775	0	1	1	0	0.370086	0	1	1	0	0.370157	0	1	1	-0.458488	0.372712	-1.23014	0.218644	NA	-0.69242	0.374551	-1.84866	0.0645063	0.153165	-0.552434	0.373627	-1.47857	0.139255	NA	-0.886305	0.373637	-2.3721	0.0176872	0.0567094	-0.201842	0.377468	-0.534728	0.592838	1	0.226442
Adamts2	ENSRNOG00000061484	ADAM metallopeptidase with thrombospondin type 1 motif, 2 [Source:RGD Symbol;Acc:1565950]	89.1888	-0.401204	0.448815	-0.893919	0.371365	0.694457	0.15629	0.44913	-0.347983	0.727853	0.883193	0.379554	0.448115	-0.847003	0.396994	0.695021	-0.624469	0.448432	-1.39256	0.163752	0.628151	-0.659329	0.448065	-1.4715	0.141155	0.293939	-0.907629	0.447697	-2.02733	0.0426288	0.110941	0.0174273	0.44711	0.0389776	0.968908	0.984512	-0.485217	0.447623	-1.08399	0.278371	0.456775	0.0212076	0.446493	0.0474981	0.962116	1	0.0920101
Adamts3	ENSRNOG00000027463	ADAM metallopeptidase with thrombospondin type 1, motif 3 [Source:RGD Symbol;Acc:1310750]	193.296	1.14189	0.353549	3.22979	0.00123881	0.037859	-0.616593	0.35081	1.75763	0.0788112	0.256436	0.845384	0.354816	-2.3826	0.0171909	0.114143	-0.320086	0.35209	-0.909104	0.363295	0.795648	-0.556978	0.350437	-1.58938	0.111974	0.247982	-0.160575	0.346794	-0.463026	0.643346	0.77415	-0.139738	0.348747	-0.400688	0.68865	0.825271	-1.41541	0.352389	-4.01662	5.90399e-05	0.000422428	-0.112946	0.345604	-0.326807	0.743814	1	0.220189
Adamts4	ENSRNOG00000003538	ADAM metallopeptidase with thrombospondin type 1 motif, 4 [Source:RGD Symbol;Acc:621242]	431.661	0.298276	0.318098	0.937685	0.348406	0.676446	-0.257697	0.317989	0.810394	0.417714	0.669818	0.0242052	0.318751	-0.0759377	0.939469	0.993751	0.016374	0.318642	0.0513867	0.959017	0.999577	-0.169271	0.317821	-0.5326	0.594311	0.753399	0.630242	0.317491	1.98507	0.0471368	0.119939	0.146982	0.317898	0.462356	0.643826	0.793739	0.235054	0.318361	0.738324	0.460318	0.635379	-0.0969124	0.317755	-0.304991	0.760373	1	-0.541817
Adamts5	ENSRNOG00000057794	ADAM metallopeptidase with thrombospondin type 1 motif, 5 [Source:RGD Symbol;Acc:735196]	22.0805	0.395853	0.416525	0.950369	0.341925	0.671008	-0.128083	0.41719	0.307014	0.758832	0.899854	-0.0980859	0.415193	0.236242	0.813245	0.943165	0.365855	0.415859	0.879758	0.37899	0.806556	0.145371	0.417118	0.348512	0.727456	0.847291	-0.194124	0.418717	-0.463618	0.642922	0.773866	-0.0421347	0.416459	-0.101174	0.919413	0.959746	-0.539399	0.417173	-1.29299	0.196016	0.3604	0.0505779	0.419362	0.120607	0.904003	1	0.467578
Adamts7	ENSRNOG00000028036	ADAM metallopeptidase with thrombospondin type 1 motif, 7 [Source:RGD Symbol;Acc:1306713]	8.95984	0.0835899	0.33555	0.249113	0.803273	NA	0.0921057	0.336143	-0.274008	0.784079	0.91407	0.256529	0.335552	-0.764499	0.44457	0.732022	-0.0808335	0.336144	-0.240473	0.809964	0.974649	-0.2008	0.337257	-0.595394	0.55158	NA	-0.0823113	0.337696	-0.243744	0.807429	0.887797	-0.21974	0.33817	-0.64979	0.515828	NA	-0.344604	0.336799	-1.02317	0.306225	0.486237	-0.178703	0.33894	-0.527241	0.598026	1	-0.210595
Adamts9	ENSRNOG00000023257	ADAM metallopeptidase with thrombospondin type 1 motif, 9 [Source:RGD Symbol;Acc:1306889]	35.4568	-0.828022	0.446427	-1.85477	0.0636285	0.316629	0.778515	0.446399	-1.74399	0.0811608	0.261373	-1.06611	0.445814	2.39139	0.0167848	0.112314	1.01661	0.445785	2.28049	0.0225789	0.305882	0.219513	0.447171	0.490894	0.623502	0.775935	-0.697828	0.446839	-1.5617	0.118359	0.241899	-0.807411	0.446123	-1.80984	0.0703208	0.178806	0.238944	0.447296	0.534196	0.593206	0.746458	0.108749	0.447706	0.242903	0.80808	1	0.138827
Adamtsl3	ENSRNOG00000010840	ADAMTS-like 3 [Source:RGD Symbol;Acc:1305155]	56.3935	0.310121	0.458781	0.675967	0.499062	0.787163	0.377017	0.458008	-0.823166	0.410413	0.663355	2.39582	0.457455	-5.23727	1.62965e-07	1.54589e-05	-1.70868	0.456655	-3.74173	0.000182755	0.0271447	-0.0547484	0.457397	-0.119696	0.904724	0.952624	-0.742983	0.457147	-1.62526	0.104107	0.219878	1.38335	0.455819	3.03486	0.00240648	0.0119612	-1.17522	0.457807	-2.56706	0.0102566	0.0363971	-0.122112	0.456134	-0.267712	0.788921	1	0.311218
Adamtsl4	ENSRNOG00000049385	ADAMTS-like 4 [Source:RGD Symbol;Acc:1561012]	39.5503	-0.217892	0.441374	-0.493669	0.62154	0.857172	-0.639568	0.440313	1.45253	0.146354	0.37238	-0.48633	0.440929	1.10297	0.270041	0.570833	-0.37113	0.439866	-0.843733	0.398818	0.81918	-0.746628	0.440572	-1.69468	0.0901365	0.212021	-0.423698	0.44199	-0.958614	0.337753	0.509835	-0.437363	0.441387	-0.990884	0.321742	0.518093	0.28825	0.441584	0.652765	0.513908	0.681452	0.494056	0.442199	1.11727	0.263879	1	0.316638
Adamtsl5	ENSRNOG00000033787	ADAMTS-like 5 [Source:RGD Symbol;Acc:1305607]	20.2261	0.197961	0.418014	0.473576	0.635802	0.865435	0.512924	0.419829	-1.22175	0.221804	0.472405	0.364744	0.418001	-0.872592	0.382886	0.683234	0.346142	0.419816	0.824508	0.409651	0.827219	-0.0548716	0.421195	-0.130276	0.896348	0.947496	-0.377562	0.420695	-0.897471	0.369468	0.542496	-0.312254	0.420771	-0.742101	0.458026	0.647694	-0.592068	0.419297	-1.41205	0.157936	0.309348	-0.0165445	0.421973	-0.0392074	0.968725	1	-0.190234
Adap1	ENSRNOG00000054033	ArfGAP with dual PH domains 1 [Source:RGD Symbol;Acc:621418]	929.292	-0.20401	0.187839	-1.08609	0.277441	0.613838	0.468144	0.187458	-2.49732	0.0125136	0.0764449	0.0552648	0.187723	-0.294395	0.768456	0.92411	0.208869	0.187342	1.11491	0.264889	0.721349	1.38236	0.188659	7.32728	2.34868e-13	7.62277e-12	1.11207	0.188998	5.88404	4.00377e-09	6.00469e-08	1.21465	0.188615	6.43982	1.19612e-10	2.69356e-09	1.23774	0.189061	6.54675	5.88023e-11	1.15801e-09	-0.0783446	0.190212	-0.41188	0.680427	1	-0.197859
Adap2	ENSRNOG00000037148	ArfGAP with dual PH domains 2 [Source:RGD Symbol;Acc:708487]	149.055	-0.259635	0.419456	-0.618981	0.535929	0.809902	-0.507704	0.420365	1.20777	0.227135	0.47931	-0.438039	0.419812	1.04342	0.296755	0.599223	-0.3293	0.420719	-0.782709	0.433798	0.83908	-0.381267	0.420275	-0.907185	0.364309	0.55492	1.00654	0.420114	2.39587	0.016581	0.052279	0.146452	0.419746	0.348907	0.727159	0.850693	1.33194	0.420308	3.16896	0.00152983	0.00729301	0.0657695	0.420963	0.156236	0.875847	1	-0.880101
Adar	ENSRNOG00000020744	adenosine deaminase, RNA-specific [Source:RGD Symbol;Acc:71099]	511.657	-0.208942	0.27398	-0.762617	0.445692	0.749208	-0.0546598	0.274685	0.198991	0.84227	0.941119	-0.981698	0.277189	3.54163	0.000397669	0.00832846	0.718096	0.277884	2.58416	0.00976163	0.203246	-0.779297	0.272969	-2.8549	0.00430508	0.0189395	-0.904518	0.271605	-3.33028	0.000867602	0.00418786	-1.41311	0.275181	-5.13521	2.81825e-07	3.75607e-06	-0.717347	0.2719	-2.63828	0.00833283	0.0307658	-0.021771	0.269503	-0.0807822	0.935615	1	0.179881
Adarb1	ENSRNOG00000001227	adenosine deaminase, RNA-specific, B1 [Source:RGD Symbol;Acc:2033]	4318.13	0.397223	0.16391	2.42342	0.0153753	0.153554	-0.165926	0.163799	1.01298	0.31107	0.572952	-0.00893267	0.16412	0.0544278	0.956594	0.998626	0.24023	0.164009	1.46474	0.142993	0.607236	0.938077	0.164154	5.71462	1.09952e-08	1.82108e-07	1.02001	0.163879	6.22417	4.84118e-10	8.28917e-09	0.695128	0.164143	4.23488	2.2867e-05	0.000205192	0.749068	0.16423	4.56109	5.08876e-06	4.57914e-05	0.126283	0.164198	0.769087	0.441841	1	0.0839952
Adarb2	ENSRNOG00000030775	adenosine deaminase, RNA-specific, B2 [Source:RGD Symbol;Acc:621519]	63.4939	-1.1474	0.458109	-2.50465	0.0122571	0.135375	0.972131	0.458208	-2.12159	0.033872	0.149613	0.00683758	0.457404	-0.0149487	0.988073	1	-0.182111	0.457505	-0.398052	0.690592	0.945951	-0.19678	0.457293	-0.430314	0.666967	0.808293	-1.30736	0.457693	-2.85642	0.00428448	0.0167149	0.69598	0.457424	1.52152	0.128129	0.276919	0.0207847	0.457162	0.0454647	0.963737	0.981395	0.180745	0.456737	0.395732	0.692303	1	0.138454
Adat1	ENSRNOG00000019434	adenosine deaminase, tRNA-specific 1 [Source:RGD Symbol;Acc:1591020]	72.1051	0.231045	0.457782	0.504705	0.613766	0.853981	-0.267138	0.457791	0.583538	0.559531	0.777452	-1.14221	0.45861	2.49058	0.0127535	0.0943014	1.10611	0.458619	2.41183	0.0158726	0.259472	0.192775	0.457878	0.421019	0.673741	0.812618	0.20724	0.457497	0.452985	0.650559	0.779558	-1.35439	0.458285	-2.95534	0.00312321	0.0149545	-0.047748	0.45773	-0.104315	0.91692	0.955881	-0.0239424	0.457445	-0.0523396	0.958258	1	0.252674
Adat2	ENSRNOG00000046983	adenosine deaminase, tRNA-specific 2 [Source:MGI Symbol;Acc:MGI:1914007]	312.546	0.242412	0.32869	0.737511	0.460812	0.759886	0.338126	0.327253	-1.03322	0.301499	0.563197	0.744328	0.328099	-2.26861	0.0232921	0.137525	-0.16379	0.326659	-0.501411	0.616082	0.917505	0.403107	0.326942	1.23296	0.217589	0.39751	-0.110505	0.3265	-0.338453	0.735022	0.841461	0.608049	0.326301	1.86346	0.0623979	0.164201	0.261779	0.329043	0.795578	0.426277	0.604521	0.614696	0.326855	1.88064	0.0600212	1	0.175487
Adat3	NA	NA	120.173	0.114234	0.43011	0.265592	0.790554	0.933647	-0.166081	0.430161	0.38609	0.69943	0.866667	0.0316426	0.430416	-0.0735163	0.941395	0.994249	-0.0834896	0.430466	-0.193952	0.846214	0.980879	0.0121946	0.430106	0.0283525	0.977381	0.987835	0.241261	0.429419	0.56183	0.574232	0.720053	-0.00854127	0.429596	-0.0198821	0.984137	0.991606	0.2314	0.430119	0.537989	0.590585	0.744146	0.104373	0.429429	0.24305	0.807967	1	-0.0629854
Adck1	ENSRNOG00000012685	aarF domain containing kinase 1 [Source:RGD Symbol;Acc:1308263]	185.643	0.171663	0.392517	0.437338	0.661866	0.878619	-0.234158	0.392643	0.596362	0.550933	0.771269	0.0751297	0.393107	-0.191117	0.848434	0.96006	-0.137624	0.393233	-0.349982	0.726352	0.954635	-0.56401	0.391702	-1.4399	0.149897	0.306332	-0.781662	0.389718	-2.00571	0.0448871	0.115453	-0.440223	0.390837	-1.12636	0.260014	0.451139	-0.994363	0.390884	-2.54388	0.0109628	0.0384055	-0.0410378	0.388066	-0.10575	0.915781	1	0.451809
Adck2	ENSRNOG00000010005	aarF domain containing kinase 2 [Source:RGD Symbol;Acc:1311058]	126.066	0.691237	0.447015	1.54634	0.122023	0.427985	-0.569198	0.446868	1.27375	0.202752	0.451176	-0.246122	0.447952	0.549438	0.582705	0.826818	0.368162	0.447806	0.822146	0.410994	0.827959	-0.418942	0.446823	-0.937603	0.348449	0.540609	-0.261725	0.445877	-0.586989	0.557211	0.708102	-0.680863	0.447081	-1.52291	0.127782	0.276321	-0.810813	0.446783	-1.81478	0.0695578	0.168109	0.14215	0.445643	0.318977	0.749744	1	0.411981
Adck3	ENSRNOG00000043201	aarF domain containing kinase 3 [Source:RGD Symbol;Acc:1308245]	706.042	0.249261	0.306141	0.814203	0.415529	0.725828	0.22037	0.305514	-0.72131	0.470719	0.712774	0.353352	0.306212	-1.15394	0.248523	0.546853	0.11628	0.305585	0.380515	0.703563	0.949781	0.125815	0.305215	0.412219	0.680179	0.817124	-0.336668	0.304851	-1.10437	0.269433	0.436713	-0.0670581	0.305057	-0.219821	0.82601	0.907569	-0.352008	0.305751	-1.15129	0.249613	0.424244	0.23392	0.304458	0.768317	0.442299	1	0.242113
Adck4	ENSRNOG00000020848	aarF domain containing kinase 4 [Source:RGD Symbol;Acc:1311356]	629.489	0.164088	0.423762	0.387218	0.698595	0.896155	-0.117364	0.423731	0.276976	0.781798	0.912589	0.112285	0.423845	-0.264919	0.791071	0.933296	-0.0655606	0.423815	-0.154691	0.877065	0.9892	-0.72194	0.42351	-1.70466	0.0882585	0.208827	-0.420263	0.42335	-0.992707	0.320853	0.491491	-0.657824	0.423405	-1.55365	0.120267	0.264872	-0.761514	0.423521	-1.79805	0.0721685	0.173092	-0.177163	0.42311	-0.418717	0.675423	1	-0.184313
Adck5	ENSRNOG00000030334	aarF domain containing kinase 5 [Source:RGD Symbol;Acc:1305504]	405.09	-0.321827	0.36365	-0.884991	0.376161	0.698796	-0.153175	0.364232	0.420543	0.674089	0.85258	0.118831	0.363382	-0.327014	0.743658	0.914143	-0.593833	0.363964	-1.63157	0.10277	0.549475	-0.357045	0.363823	-0.981368	0.326411	0.519128	-0.216906	0.363125	-0.597332	0.550286	0.702415	0.304414	0.362943	0.838736	0.401617	0.596588	0.418432	0.363407	1.15141	0.249563	0.424244	0.313511	0.362882	0.863948	0.387617	1	0.0130365
Adcy1	ENSRNOG00000059479	adenylate cyclase 1 (brain) [Source:RGD Symbol;Acc:1309318]	348.34	0.833162	0.334021	2.49434	0.0126191	0.137029	0.130107	0.331755	-0.392178	0.694926	0.864205	0.557475	0.334776	-1.66522	0.0958695	0.325992	0.405794	0.332517	1.22037	0.222325	0.678895	0.320579	0.3317	0.966472	0.333808	0.526304	0.448381	0.331607	1.35215	0.176328	0.323617	-0.232603	0.331864	-0.700897	0.483367	0.671708	-0.623366	0.333844	-1.86724	0.0618685	0.15449	-0.238585	0.331428	-0.71987	0.471605	1	-0.25791
Adcy10	ENSRNOG00000053410	adenylate cyclase 10 (soluble) [Source:RGD Symbol;Acc:708450]	31.4167	-0.354584	0.405598	-0.874225	0.381996	0.702877	1.04207	0.406471	-2.5637	0.0103562	0.0676438	0.108266	0.406019	-0.266652	0.789737	0.932747	0.579222	0.406892	1.42353	0.154583	0.617932	0.247322	0.407647	0.606707	0.544045	0.714067	-0.523268	0.406612	-1.2869	0.198129	0.351951	-0.489268	0.407333	-1.20115	0.229693	0.415774	-0.14865	0.40662	-0.365575	0.714682	0.833548	0.0200341	0.407632	0.0491474	0.960802	1	-0.271481
Adcy2	ENSRNOG00000032150	adenylate cyclase 2 (brain) [Source:RGD Symbol;Acc:619965]	2214.19	0.212965	0.180695	1.17859	0.238562	0.579605	0.304118	0.180168	-1.68797	0.0914176	0.280047	0.661782	0.180489	-3.6666	0.000245797	0.00580774	-0.144699	0.179962	-0.804054	0.421366	0.834777	0.301489	0.179993	1.675	0.0939334	0.218435	0.165608	0.180014	0.919975	0.357586	0.530292	0.523951	0.179768	2.91461	0.00356139	0.0166656	-0.0406368	0.180568	-0.22505	0.82194	0.899501	0.00672032	0.179886	0.0373588	0.970199	1	-0.168237
Adcy3	ENSRNOG00000003999	adenylate cyclase 3 [Source:RGD Symbol;Acc:71009]	820.04	-0.365139	0.197168	-1.85192	0.0640378	0.316965	0.463661	0.196903	-2.35477	0.0185344	0.101046	-0.253365	0.197321	1.28403	0.199133	0.490177	0.351887	0.197056	1.78572	0.0741446	0.487756	0.139862	0.195773	0.714408	0.474975	0.657376	-0.568744	0.195576	-2.90806	0.00363684	0.0144676	-0.137416	0.196247	-0.700219	0.48379	0.67195	-0.0847086	0.195673	-0.432908	0.665082	0.799603	0.118897	0.194068	0.612655	0.540104	1	0.244945
Adcy4	ENSRNOG00000020401	adenylate cyclase 4 [Source:RGD Symbol;Acc:2034]	18.8846	-0.469346	0.378089	-1.24137	0.214471	0.552101	0.739726	0.378619	-1.95375	0.0507308	0.193835	-0.0518099	0.378594	0.136848	0.891151	0.978466	0.32219	0.379124	0.849828	0.395421	0.818327	-0.0382928	0.380255	-0.100703	0.919786	0.960717	-0.416241	0.379138	-1.09786	0.272265	0.439617	-0.107435	0.379739	-0.282917	0.77724	0.879436	0.239561	0.379143	0.631848	0.527487	0.692603	0.186456	0.380191	0.490426	0.623832	1	-0.361778
Adcy5	ENSRNOG00000002229	adenylate cyclase 5 [Source:RGD Symbol;Acc:71014]	1081.95	0.172991	0.239374	0.722681	0.469876	0.767093	-0.448868	0.239627	1.8732	0.0610414	0.218698	-1.14287	0.241019	4.74182	2.1181e-06	0.000131373	0.86699	0.241269	3.59345	0.000326325	0.0370864	0.992729	0.240829	4.12213	3.75379e-05	0.000306229	1.00419	0.239507	4.19275	2.75593e-05	0.000199795	0.168766	0.241753	0.698093	0.485119	0.673267	0.835021	0.239916	3.48047	0.000500543	0.00278965	0.00381917	0.240049	0.01591	0.987306	1	0.437404
Adcy6	ENSRNOG00000054757	adenylate cyclase 6 [Source:RGD Symbol;Acc:2035]	312.498	0.618772	0.282905	2.18721	0.0287274	0.214795	0.1845	0.280118	-0.658651	0.51012	0.741666	0.833965	0.282806	-2.94889	0.00318917	0.0367025	-0.0306928	0.280018	-0.10961	0.912719	0.994357	1.0132	0.281862	3.59467	0.000324806	0.00206276	0.292184	0.279648	1.04483	0.296103	0.46531	1.23066	0.28176	4.36777	1.25522e-05	0.000120352	-0.287728	0.282891	-1.0171	0.309107	0.489175	0.0388604	0.279634	0.138969	0.889475	1	0.536516
Adcy7	ENSRNOG00000014776	adenylate cyclase 7 [Source:RGD Symbol;Acc:619966]	48.5843	0.180366	0.431085	0.4184	0.675654	0.884142	-0.41358	0.430784	0.960065	0.337023	0.598901	-0.0418903	0.430669	0.097268	0.922514	0.988656	-0.191324	0.430367	-0.444559	0.656639	0.935735	-1.42813	0.431549	-3.30931	0.000935263	0.00518963	-0.389156	0.432174	-0.900463	0.367874	0.54094	-0.847392	0.431861	-1.96219	0.0497405	0.138686	-0.707764	0.431682	-1.63955	0.101099	0.223229	-0.138242	0.432769	-0.319436	0.749396	1	-0.625394
Adcy8	ENSRNOG00000004890	adenylate cyclase 8 (brain) [Source:RGD Symbol;Acc:2036]	258.513	-1.00339	0.376683	-2.66375	0.0077274	0.103824	-0.535117	0.379414	1.41038	0.158428	0.391033	-1.42894	0.377888	3.78138	0.000155959	0.00407375	-0.109567	0.380606	-0.287875	0.773442	0.96802	-0.311662	0.379405	-0.821451	0.41139	0.599702	-0.320722	0.376676	-0.851455	0.394517	0.566062	-0.0684988	0.37882	-0.180821	0.856508	0.925458	0.530309	0.375651	1.41171	0.158036	0.309495	-0.15236	0.375643	-0.405598	0.685038	1	0.544176
Adcyap1	ENSRNOG00000049882	adenylate cyclase activating polypeptide 1 [Source:RGD Symbol;Acc:2037]	281.385	0.129709	0.367196	0.353242	0.723907	0.906182	-0.126993	0.367142	0.345896	0.729421	0.884397	0.547567	0.366747	-1.49304	0.135427	0.396282	-0.544851	0.366693	-1.48585	0.137318	0.600978	-0.737054	0.365868	-2.01453	0.0439535	0.123569	-0.410394	0.364948	-1.12453	0.260789	0.42696	-0.473351	0.364038	-1.30028	0.193505	0.368784	-0.632167	0.365921	-1.7276	0.0840592	0.194347	-0.0920644	0.363662	-0.253159	0.800145	1	-0.199668
Adcyap1r1	ENSRNOG00000012098	adenylate cyclase activating polypeptide 1 receptor type 1 [Source:RGD Symbol;Acc:2038]	1702.18	-0.152897	0.234311	-0.652538	0.514054	0.796284	-0.79942	0.235081	3.40061	0.000672354	0.00915955	-0.832914	0.234918	3.54556	0.000391783	0.00824988	-0.119402	0.235686	-0.506616	0.612424	0.916066	0.244416	0.235651	1.03719	0.299646	0.489558	0.212128	0.23414	0.905989	0.364942	0.538223	0.299288	0.235248	1.27222	0.203294	0.38225	0.418831	0.234274	1.78778	0.0738114	0.17621	0.053806	0.234103	0.229839	0.818217	1	0.831707
Add1	ENSRNOG00000013039	adducin 1 (alpha) [Source:RGD Symbol;Acc:2041]	6284.81	-0.0470631	0.104331	-0.451095	0.651921	0.873557	-0.145268	0.104452	1.39076	0.164299	0.398812	-0.073648	0.104446	0.70513	0.480729	0.758085	-0.118683	0.104567	-1.13499	0.256379	0.715078	0.00910498	0.104413	0.0872017	0.930511	0.965776	-0.0257457	0.10398	-0.247602	0.804443	0.886015	0.120814	0.104188	1.15959	0.246218	0.435559	-0.0333171	0.104134	-0.319944	0.749011	0.856727	-0.0546345	0.103783	-0.526432	0.598588	1	0.180119
Add2	ENSRNOG00000015903	adducin 2 (beta) [Source:RGD Symbol;Acc:2042]	1328.97	0.622118	0.195479	3.18254	0.00145991	0.0419542	-0.482502	0.195255	2.47114	0.0134683	0.0803705	-0.117925	0.196473	0.60021	0.548366	0.802889	0.257541	0.19625	1.31231	0.189415	0.649332	0.36879	0.195865	1.88288	0.0597168	0.15601	0.785388	0.194814	4.03147	5.54287e-05	0.000371574	-0.122715	0.195678	-0.627129	0.530574	0.710192	0.15817	0.195885	0.807464	0.419399	0.598166	-0.00509959	0.195222	-0.026122	0.97916	1	0.0659038
Add3	ENSRNOG00000012820	adducin 3 (gamma) [Source:RGD Symbol;Acc:2043]	2238.24	0.24423	0.186158	1.31195	0.189536	0.522884	-0.47372	0.186344	2.54218	0.0110163	0.0702934	-0.255326	0.186629	1.36809	0.171283	0.451823	0.0258362	0.186814	0.138299	0.890004	0.990412	0.575829	0.186952	3.08009	0.00206937	0.0103263	0.48097	0.18584	2.58808	0.00965113	0.033393	0.304943	0.186554	1.63461	0.102131	0.235771	0.321844	0.186294	1.72761	0.0840582	0.194347	0.0851038	0.185977	0.457604	0.647237	1	0.568578
Adgrb2	ENSRNOG00000014375	adhesion G protein-coupled receptor B2 [Source:RGD Symbol;Acc:1309431]	5482.51	0.15819	0.156492	1.01085	0.312088	0.643909	-0.292166	0.156537	1.86644	0.0619799	0.22008	-0.0946836	0.156622	0.604536	0.545488	0.800764	-0.0392924	0.156666	-0.250803	0.801966	0.973047	0.964736	0.15693	6.14755	7.86909e-10	1.57395e-08	0.954361	0.156533	6.09688	1.08159e-09	1.76841e-08	0.916757	0.156769	5.8478	4.98108e-09	8.75226e-08	0.793126	0.156693	5.06164	4.15666e-07	4.59169e-06	-0.00304515	0.156734	-0.0194288	0.984499	1	0.302541
Adgrb3	ENSRNOG00000012045	adhesion G protein-coupled receptor B3 [Source:RGD Symbol;Acc:1309703]	1260.32	-0.031668	0.214487	-0.147645	0.882623	0.970538	0.199659	0.214199	-0.932122	0.351273	0.61325	0.525685	0.214027	-2.45617	0.0140428	0.0998706	-0.357694	0.213737	-1.67352	0.0942249	0.534071	0.0746571	0.213771	0.349239	0.72691	0.847039	-0.433877	0.213212	-2.03496	0.0418554	0.109413	0.520721	0.213143	2.44306	0.0145634	0.0534896	-0.36794	0.2137	-1.72176	0.0851131	0.196025	0.0342684	0.21242	0.161324	0.871838	1	0.308874
Adgre1	ENSRNOG00000046254	adhesion G protein-coupled receptor E1 [Source:RGD Symbol;Acc:1359214]	238.367	0.584127	0.384935	1.51747	0.129149	0.439661	1.3375	0.379692	-3.52261	0.000427326	0.00643922	1.85965	0.382861	-4.85724	1.19033e-06	8.30077e-05	0.0619823	0.377575	0.164159	0.869606	0.987209	-0.935542	0.376392	-2.48555	0.012935	0.0468422	-0.985366	0.379301	-2.59785	0.00938104	0.032642	-0.258039	0.376702	-0.684996	0.493347	0.679587	-1.23369	0.383016	-3.22098	0.00127752	0.00624943	0.335803	0.37734	0.889921	0.373508	1	-1.28768
Adgre5	ENSRNOG00000004489	adhesion G protein-coupled receptor E5 [Source:RGD Symbol;Acc:1305595]	77.7168	-0.0637267	0.460571	-0.138365	0.889952	0.973017	-0.164152	0.460599	0.356387	0.72155	0.879625	-0.535116	0.460653	1.16165	0.245379	0.543529	0.307238	0.46068	0.666922	0.504822	0.87284	-0.421549	0.46055	-0.915317	0.360025	0.551298	0.122026	0.460514	0.264979	0.791026	0.878396	-0.142551	0.460622	-0.309474	0.756961	0.86709	0.323818	0.460563	0.703093	0.481998	0.653872	0.138065	0.460506	0.299812	0.764321	1	-0.379424
Adgrf3	ENSRNOG00000024766	adhesion G protein-coupled receptor F3 [Source:RGD Symbol;Acc:1305868]	2.17821	0	0.117925	0	1	NA	0	0.117934	0	1	NA	0.0885618	0.117889	-0.751229	0.452515	NA	-0.0885696	0.117898	-0.751237	0.45251	NA	-0.00515851	0.118025	-0.0437069	0.965138	NA	0	0.118211	0	1	NA	0.0838672	0.118166	0.709741	0.477865	NA	-0.0820936	0.118078	-0.695247	0.4869	NA	-0.082339	0.118364	-0.69564	0.486654	1	-0.0053962
Adgrf5	ENSRNOG00000011154	adhesion G protein-coupled receptor F5 [Source:RGD Symbol;Acc:621679]	24.8907	-0.987827	0.421919	-2.34127	0.0192182	0.171434	0.581277	0.421346	-1.37957	0.167718	0.404295	-1.12129	0.421229	2.66195	0.00776885	0.0687893	0.714743	0.420655	1.69912	0.089297	0.523363	0.000405551	0.422607	0.00095964	0.999234	1	-0.709122	0.42238	-1.67887	0.0931769	0.202912	-0.608076	0.421405	-1.44297	0.149028	0.307986	0.62361	0.423049	1.47409	0.140458	0.284845	0.344905	0.423508	0.814399	0.415416	1	0.128251
Adgrg1	ENSRNOG00000014963	adhesion G protein-coupled receptor G1 [Source:RGD Symbol;Acc:628617]	2227.25	-0.206191	0.169	-1.22006	0.22244	0.560594	-0.929317	0.170233	5.45908	4.78598e-08	3.92046e-06	-1.1463	0.170133	6.73767	1.60947e-11	4.07134e-09	0.010788	0.171357	0.0629564	0.949801	0.998016	-0.028699	0.170808	-0.168019	0.866568	0.932619	0.000221822	0.168698	0.00131491	0.998951	0.999939	0.268833	0.170859	1.57342	0.115621	0.257751	0.249555	0.168819	1.47824	0.139344	0.283143	0.0431423	0.168517	0.256011	0.797942	1	0.900396
Adgrg2	ENSRNOG00000032472	adhesion G protein-coupled receptor G2 [Source:RGD Symbol;Acc:628618]	31.3453	1.17374	0.399962	2.93463	0.00333947	0.0673543	-0.914496	0.400412	2.28389	0.0223783	0.114757	0.0593841	0.398629	-0.148971	0.881577	0.974235	0.199861	0.39908	0.500804	0.616509	0.917819	-0.0284483	0.399876	-0.0711429	0.943284	0.969764	0.569844	0.401498	1.41929	0.155814	0.295201	-0.071152	0.399719	-0.178005	0.858719	0.926991	-0.34314	0.399583	-0.858745	0.390481	0.570634	0.260758	0.40112	0.650075	0.515643	1	0.316204
Adgrg5	ENSRNOG00000039891	adhesion G protein-coupled receptor G5 [Source:RGD Symbol;Acc:1305559]	6.096	-0.0571961	0.221865	-0.257797	0.796563	NA	0	0.221804	0	1	1	0.0796096	0.221819	-0.358895	0.719673	0.901408	-0.135962	0.221758	-0.613111	0.539803	NA	-0.776066	0.222762	-3.48384	0.000494274	NA	0	0.222664	0	1	NA	-0.0322508	0.222751	-0.144784	0.884881	NA	0.000642097	0.222317	0.0028882	0.997696	NA	-0.0573937	0.223116	-0.257237	0.796996	1	-0.777749
Adgrl1	ENSRNOG00000029134	adhesion G protein-coupled receptor L1 [Source:RGD Symbol;Acc:620768]	5394.55	0.0794544	0.172494	0.460621	0.64507	0.870684	0.205916	0.172407	-1.19436	0.232338	0.485931	0.149521	0.172519	-0.866693	0.38611	0.68631	0.135849	0.172432	0.787838	0.430791	0.837861	1.46961	0.172772	8.50608	1.79907e-17	9.89159e-16	1.2323	0.172667	7.13683	9.55113e-13	2.2731e-11	1.41924	0.172762	8.215	2.12161e-16	1.03483e-14	1.2288	0.172828	7.10996	1.16079e-12	2.8281e-11	0.0759543	0.173001	0.439041	0.660632	1	0.0313968
Adgrl2	ENSRNOG00000032660	adhesion G protein-coupled receptor L2 [Source:RGD Symbol;Acc:620835]	781.382	0.368318	0.290097	1.26964	0.204214	0.542814	-0.663173	0.290427	2.28344	0.0224043	0.11477	-0.244861	0.290798	0.842033	0.399769	0.697555	-0.0499946	0.291127	-0.171728	0.863651	0.984821	0.309828	0.29108	1.06441	0.287144	0.476875	0.907692	0.289942	3.1306	0.00174452	0.00772224	0.324715	0.290707	1.11698	0.264001	0.455769	0.31364	0.290359	1.08018	0.280061	0.458634	-0.225734	0.290204	-0.777846	0.43666	1	0.0653089
Adgrl3	ENSRNOG00000030149	adhesion G protein-coupled receptor L3 [Source:RGD Symbol;Acc:620836]	1001.53	0.200721	0.224157	0.895447	0.370548	0.694021	-0.701009	0.224948	3.11631	0.0018313	0.0195562	-0.24856	0.224907	1.10517	0.269086	0.570119	-0.251727	0.225695	-1.11534	0.264703	0.721165	0.0308332	0.225527	0.136716	0.891255	0.945183	0.371772	0.223552	1.66302	0.0963082	0.208077	0.476421	0.225004	2.11739	0.0342268	0.10449	0.151619	0.224172	0.676352	0.498817	0.668284	-0.0194316	0.223566	-0.0869166	0.930738	1	0.36007
Adgrl4	ENSRNOG00000033940	adhesion G protein-coupled receptor L4 [Source:RGD Symbol;Acc:621136]	28.3007	-0.643168	0.435357	-1.47733	0.139586	0.457693	-0.0754191	0.434288	0.173661	0.862132	0.949294	-0.466113	0.435364	1.07063	0.284337	0.586756	-0.252474	0.434295	-0.581342	0.56101	0.897499	0.23702	0.43416	0.545927	0.585116	0.745627	-0.350297	0.435767	-0.803864	0.421476	0.590516	-0.106244	0.43568	-0.243857	0.807341	0.896852	0.101181	0.43633	0.231891	0.816623	0.897031	-0.19169	0.436738	-0.438912	0.660725	1	0.662736
Adh1	NA	NA	18.6031	0.0266356	0.386649	0.0688883	0.945079	0.990055	-0.70497	0.385254	1.82988	0.0672672	0.230978	-0.506784	0.385446	1.3148	0.188578	0.475071	-0.17155	0.384049	-0.446688	0.6551	0.935537	-0.218867	0.384879	-0.568666	0.569583	0.734377	0.372241	0.387165	0.961452	0.336325	0.508301	-0.466675	0.386295	-1.20808	0.227017	0.412455	0.362757	0.386578	0.93838	0.348049	0.530771	0.0171522	0.387094	0.0443102	0.964657	1	0.113862
Adh4	ENSRNOG00000046357	alcohol dehydrogenase 4 (class II), pi polypeptide [Source:RGD Symbol;Acc:71028]	3.65867	0.24311	0.278173	0.873952	0.382144	NA	0.0970291	0.279565	-0.347072	0.728537	NA	0.303595	0.277815	-1.0928	0.274483	NA	0.0365439	0.279208	0.130884	0.895867	NA	0.256446	0.279772	0.916627	0.359338	NA	0.0913731	0.281022	0.325146	0.745071	NA	0.0991577	0.280714	0.353234	0.723913	NA	-0.195508	0.278988	-0.700777	0.483442	NA	-0.0437713	0.281832	-0.15531	0.876577	1	0.0680439
Adh5	NA	NA	1573.9	-0.0209995	0.161462	-0.130059	0.89652	0.974806	-0.303523	0.162106	1.87238	0.0611543	0.218917	0.0101235	0.16169	-0.0626108	0.950076	0.996964	-0.334646	0.162332	-2.06149	0.0392566	0.380767	-0.786175	0.161243	-4.87572	1.08413e-06	1.248e-05	-0.471337	0.159965	-2.94651	0.00321381	0.0130437	-0.316004	0.160339	-1.97085	0.0487411	0.13671	-0.438352	0.160517	-2.73087	0.00631672	0.0244575	0.0119855	0.159011	0.0753755	0.939916	1	-0.0113141
Adh6	ENSRNOG00000012436	alcohol dehydrogenase 6 (class V) [Source:RGD Symbol;Acc:1306313]	1.67713	0	0.117343	0	1	NA	0	0.117355	0	1	NA	0.0782043	0.117292	-0.666746	0.504934	NA	-0.078214	0.117304	-0.666764	0.504923	NA	-0.0828022	0.117504	-0.704676	0.481012	NA	-0.0287122	0.117716	-0.24391	0.807301	NA	0.0238514	0.117662	0.202711	0.839361	NA	0	0.117503	0	1	NA	0.0288487	0.117876	0.244737	0.80666	1	-0.0542399
Adh7	ENSRNOG00000032959	alcohol dehydrogenase 7 (class IV), mu or sigma polypeptide [Source:RGD Symbol;Acc:621638]	1.30476	0	0.101415	0	1	NA	0	0.101424	0	1	NA	0	0.101335	0	1	NA	0	0.101345	0	1	NA	0	0.101518	0	1	NA	0	0.101714	0	1	NA	-0.0571838	0.101643	-0.562596	0.57371	NA	-0.0750975	0.101573	-0.739344	0.459698	NA	-0.0753142	0.101872	-0.739302	0.459724	1	0
Adhfe1	ENSRNOG00000007069	alcohol dehydrogenase, iron containing, 1 [Source:RGD Symbol;Acc:1308863]	872.801	-0.468541	0.205796	-2.27673	0.0228026	0.188706	0.486135	0.205722	-2.36307	0.0181244	0.0994519	-0.227223	0.205638	1.10497	0.269173	0.570119	0.244818	0.205564	1.19096	0.233671	0.692792	0.11036	0.204553	0.53952	0.589528	0.749137	-0.461808	0.204632	-2.25678	0.0240221	0.0701599	-0.0704985	0.204735	-0.34434	0.730591	0.852925	-0.0932123	0.204209	-0.456456	0.648062	0.787434	-0.0999447	0.203035	-0.492253	0.622541	1	0.0860338
Adi1	ENSRNOG00000008950	acireductone dioxygenase 1 [Source:RGD Symbol;Acc:727828]	953.471	-0.082338	0.24749	-0.332693	0.739366	0.913221	-0.0422681	0.247672	0.170662	0.86449	0.950447	0.304777	0.24721	-1.23287	0.217625	0.510006	-0.429383	0.247392	-1.73564	0.0826282	0.507039	-0.545255	0.246867	-2.2087	0.0271953	0.0846583	-0.402541	0.246288	-1.63443	0.102169	0.217424	0.0143319	0.246061	0.0582454	0.953553	0.978185	-0.173481	0.246807	-0.7029	0.482118	0.653899	0.146722	0.245602	0.597397	0.550242	1	-0.100446
Adipoq	ENSRNOG00000001821	adiponectin, C1Q and collagen domain containing [Source:RGD Symbol;Acc:628748]	13.0942	1.27379	0.327396	3.89066	9.99734e-05	0.00781675	-1.27399	0.327443	3.89071	9.99512e-05	0.00211913	0	0.325068	0	1	1	0	0.325115	0	1	1	-0.0356208	0.326065	-0.109244	0.913009	0.957292	0.984363	0.329371	2.98862	0.00280244	0.0116285	-0.148843	0.326781	-0.455484	0.648761	NA	-0.400919	0.326781	-1.22688	0.219869	0.389167	-0.111496	0.328757	-0.339144	0.734502	1	0.254003
Adipor1	ENSRNOG00000004143	adiponectin receptor 1 [Source:RGD Symbol;Acc:1303151]	2343.64	0.346318	0.191292	1.81041	0.0702316	0.329217	0.131804	0.190642	-0.69137	0.489333	0.726826	0.406586	0.191405	-2.12421	0.0336523	0.173993	0.0715363	0.190755	0.375016	0.707649	0.950769	-0.708068	0.189898	-3.72867	0.000192495	0.00131695	-0.732989	0.189705	-3.86383	0.000111622	0.000686662	-0.773384	0.189789	-4.07496	4.6022e-05	0.000384498	-1.07759	0.190551	-5.6551	1.55751e-08	2.18906e-07	0.00171811	0.188958	0.00909254	0.992745	1	-0.106883
Adipor2	ENSRNOG00000007990	adiponectin receptor 2 [Source:RGD Symbol;Acc:1307891]	343.476	-0.518592	0.358486	-1.44662	0.148004	0.471013	0.893196	0.357799	-2.49636	0.0125475	0.0765407	0.170467	0.357491	-0.476843	0.633474	0.855549	0.204137	0.356802	0.572128	0.567235	0.899315	-0.0777238	0.355916	-0.218377	0.827136	0.908653	-0.960174	0.356906	-2.69027	0.00713939	0.0259783	-0.205922	0.356002	-0.57843	0.562974	0.734048	-0.523191	0.356435	-1.46784	0.142147	0.287229	-0.0816091	0.354844	-0.229986	0.818102	1	-0.0107455
Adk	ENSRNOG00000012325	adenosine kinase [Source:RGD Symbol;Acc:2046]	1514.02	-0.513492	0.200793	-2.55733	0.0105481	0.125132	0.147374	0.201285	-0.732168	0.464066	0.707541	-0.223026	0.20063	1.11163	0.266297	0.56757	-0.143092	0.201123	-0.711465	0.476796	0.859804	-0.610001	0.200261	-3.04603	0.00231881	0.0113269	-0.589429	0.200047	-2.94646	0.00321438	0.0130437	-0.447872	0.199801	-2.24159	0.024988	0.0818201	-0.120725	0.199777	-0.604297	0.545646	0.708076	-0.0447882	0.199027	-0.225036	0.821951	1	-0.167947
Adm	ENSRNOG00000027030	adrenomedullin [Source:RGD Symbol;Acc:2047]	45.1944	-0.353294	0.45915	-0.769452	0.441625	0.746147	0.432864	0.459228	-0.942591	0.34589	0.607462	0.037941	0.45932	-0.0826027	0.934167	0.992285	0.0416289	0.459397	0.0906165	0.927797	0.996337	-0.883968	0.459902	-1.92208	0.0545956	0.145609	-1.52026	0.459853	-3.30597	0.000946487	0.00452944	-1.25485	0.46003	-2.72775	0.00637672	0.0272973	-0.906422	0.459835	-1.97119	0.0487025	0.127963	0.260546	0.460515	0.56577	0.57155	1	0.203429
Adm2	#N/A	#N/A	1.97073	0	0.101784	0	1	NA	0	0.101791	0	1	NA	0.246673	0.101808	-2.42291	0.0153967	NA	-0.246678	0.101815	-2.42279	0.0154017	NA	0	0.101861	0	1	NA	0	0.102008	0	1	NA	0.246829	0.102023	2.41934	0.0155487	NA	0	0.101883	0	1	NA	0	0.102107	0	1	1	0
Adnp	ENSRNOG00000010975	activity-dependent neuroprotector homeobox [Source:RGD Symbol;Acc:71030]	1972.03	-0.203581	0.187407	-1.0863	0.277345	0.61383	0.189683	0.187404	-1.01216	0.311461	0.573381	-0.0996275	0.187461	0.531458	0.595102	0.833957	0.0857295	0.187458	0.457327	0.647436	0.932722	0.690672	0.187637	3.6809	0.00023241	0.00155039	0.284002	0.187247	1.51672	0.129337	0.258465	0.513243	0.187425	2.73839	0.00617403	0.0265393	0.602936	0.187456	3.21641	0.00129803	0.00633748	0.115354	0.187297	0.61589	0.537967	1	0.216988
Adnp2	ENSRNOG00000053370	ADNP homeobox 2 [Source:RGD Symbol;Acc:1308279]	254.827	0.784832	0.378822	2.07177	0.038287	0.249357	-0.0346409	0.377046	0.0918745	0.926798	0.976493	0.96268	0.378814	-2.5413	0.011044	0.0852145	-0.21249	0.377038	-0.563576	0.573042	0.901758	0.000558996	0.376787	0.00148359	0.998816	0.999896	-0.152847	0.375877	-0.40664	0.684272	0.803937	0.116606	0.376	0.310122	0.756468	0.866954	-0.947087	0.37822	-2.50406	0.0122777	0.0422084	-0.00940834	0.375269	-0.0250709	0.979998	1	0.188047
Ado	NA	NA	5.98258	0.179434	0.383598	0.467766	0.639952	NA	0.0348974	0.384965	-0.0906507	0.92777	0.977086	0.343829	0.383554	-0.896428	0.370024	0.67137	-0.129497	0.384922	-0.336425	0.73655	NA	0.333712	0.384623	0.867634	0.385595	NA	0.27733	0.386739	0.717098	0.473314	NA	0.105744	0.3879	0.272607	0.785155	NA	-0.188276	0.385043	-0.488975	0.624859	NA	-0.286172	0.388177	-0.737221	0.460988	1	0.0214848
Adora1	ENSRNOG00000003442	adenosine A1 receptor [Source:RGD Symbol;Acc:2048]	491.866	0.105828	0.365087	0.28987	0.771915	0.926872	-0.191492	0.365202	0.524345	0.600039	0.805539	0.395804	0.364946	-1.08455	0.278119	0.578898	-0.481468	0.365061	-1.31887	0.187213	0.648485	-1.00166	0.364278	-2.74971	0.00596487	0.0247154	-0.586451	0.363604	-1.61288	0.10677	0.22393	-0.562461	0.363323	-1.5481	0.121598	0.266875	-0.727991	0.364213	-1.9988	0.0456295	0.121758	-0.0357123	0.362725	-0.0984555	0.921571	1	-0.223715
Adora2a	ENSRNOG00000001302	adenosine A2a receptor [Source:RGD Symbol;Acc:2049]	797.509	0.517491	0.31631	1.63603	0.101834	0.39625	-1.30304	0.317454	4.10467	4.049e-05	0.00107988	-1.02325	0.318388	3.21385	0.0013097	0.0197389	0.237696	0.319524	0.743908	0.456932	0.852073	-0.538337	0.317867	-1.69359	0.090343	0.212423	-0.151026	0.315302	-0.478987	0.631948	0.765792	-0.576574	0.318168	-1.81217	0.0699601	0.178236	-0.827095	0.315974	-2.6176	0.00885504	0.0323713	-0.158578	0.314966	-0.503478	0.614628	1	0.915733
Adora2b	ENSRNOG00000002922	adenosine A2B receptor [Source:RGD Symbol;Acc:2050]	121.928	0.518648	0.460163	1.1271	0.259702	0.599207	-0.267507	0.460103	0.581408	0.560966	0.778588	0.999336	0.460118	-2.17191	0.0298621	0.162416	-0.748195	0.460057	-1.62631	0.103884	0.551542	-0.395824	0.46005	-0.860392	0.389573	0.579947	-0.559753	0.459879	-1.21718	0.223537	0.383065	0.181035	0.459863	0.393672	0.693823	0.828223	-1.27082	0.460033	-2.76245	0.00573695	0.0225928	-0.192416	0.459746	-0.418526	0.675563	1	0.431437
Adpgk	ENSRNOG00000026178	ADP-dependent glucokinase [Source:RGD Symbol;Acc:1306103]	945.959	-0.510191	0.247673	-2.05994	0.0394041	0.252173	0.237553	0.2481	-0.957488	0.338321	0.600236	-0.389569	0.247764	1.57234	0.115872	0.364246	0.116931	0.248191	0.471132	0.637547	0.928315	-0.696002	0.246697	-2.82129	0.00478312	0.0206281	-0.925171	0.246481	-3.75352	0.000174368	0.0010111	-0.586814	0.246771	-2.37797	0.0174082	0.0615252	-0.200137	0.246361	-0.812373	0.416578	0.595843	0.214842	0.245162	0.876325	0.380853	1	-0.00838451
Adprh	ENSRNOG00000027260	ADP-ribosylarginine hydrolase [Source:RGD Symbol;Acc:2052]	2112.92	-0.0668628	0.158272	-0.422457	0.672692	0.883252	-0.0063437	0.158344	0.0400627	0.968043	0.993562	-0.218819	0.158662	1.37915	0.167849	0.446344	0.145612	0.158735	0.917331	0.358969	0.790939	-0.303009	0.157868	-1.91938	0.0549368	0.146219	-0.180291	0.157478	-1.14486	0.252266	0.417218	-0.261565	0.157951	-1.65599	0.0977246	0.228108	-0.0599768	0.157843	-0.379978	0.703961	0.825582	0.0534512	0.157047	0.340351	0.733592	1	-0.116374
Adprhl1	ENSRNOG00000062013	ADP-ribosylhydrolase like 1 [Source:MGI Symbol;Acc:MGI:2442168]	46.284	1.69808	0.460658	3.68619	0.000227633	0.0137735	0.08298	0.460922	-0.18003	0.857129	0.947744	1.84697	0.46066	-4.0094	6.08725e-05	0.00193905	-0.0659163	0.460925	-0.143009	0.886283	0.990064	0.00992294	0.460893	0.0215298	0.982823	0.99025	0.774068	0.460938	1.67933	0.0930875	0.202789	0.101292	0.460866	0.219785	0.826038	0.907569	-0.405726	0.460694	-0.880685	0.378488	0.559766	0.518282	0.460997	1.12426	0.260901	1	-0.847125
Adprhl2	ENSRNOG00000010849	ADP-ribosylhydrolase like 2 [Source:RGD Symbol;Acc:1309068]	1664.79	-0.20564	0.191487	-1.07392	0.28286	0.619311	0.322869	0.191323	-1.68756	0.0914951	0.280148	0.16859	0.191264	-0.881449	0.378075	0.678757	-0.0513609	0.1911	-0.268764	0.788111	0.971412	-0.0374881	0.190752	-0.196528	0.844197	0.918907	-0.250056	0.190752	-1.31089	0.189893	0.341553	0.0186632	0.190475	0.0979825	0.921946	0.96111	-0.0811918	0.190889	-0.425335	0.670592	0.803367	-0.0367762	0.190152	-0.193404	0.846643	1	-0.110301
Adprm	ENSRNOG00000003397	ADP-ribose/CDP-alcohol diphosphatase, manganese-dependent [Source:RGD Symbol;Acc:1309906]	392.626	-0.457189	0.331527	-1.37904	0.167883	0.496433	0.492201	0.331415	-1.48515	0.137504	0.357504	0.449724	0.330139	-1.36223	0.173126	0.453963	-0.414713	0.330026	-1.25661	0.208896	0.666133	-0.590774	0.329326	-1.79389	0.072831	0.180407	-0.9745	0.329724	-2.9555	0.00312159	0.0127343	0.0294519	0.328459	0.0896668	0.928552	0.964575	-0.27396	0.329702	-0.830933	0.406012	0.586308	0.243351	0.327886	0.742181	0.457978	1	-0.108475
Adra1a	ENSRNOG00000009522	adrenoceptor alpha 1A [Source:RGD Symbol;Acc:2055]	13.2443	-0.554488	0.363646	-1.5248	0.127309	0.436608	0.100114	0.362594	-0.276106	0.782467	0.913035	-0.599908	0.363079	1.65228	0.0984775	0.33128	0.145534	0.362025	0.402	0.687684	0.945651	-0.165887	0.363619	-0.456211	0.648239	0.79372	-0.484417	0.364703	-1.32825	0.184095	0.333557	-0.434985	0.363951	-1.19517	0.232019	NA	0.04819	0.365215	0.13195	0.895024	0.944145	-0.0218802	0.366269	-0.0597381	0.952364	1	0.218416
Adra1b	ENSRNOG00000060087	adrenoceptor alpha 1B [Source:RGD Symbol;Acc:2054]	98.5916	0.19021	0.377476	0.503899	0.614332	0.854572	0.118273	0.376198	-0.31439	0.753225	0.897778	-0.136689	0.379312	0.360359	0.718579	0.900912	0.445171	0.378043	1.17757	0.238969	0.697281	0.0994919	0.375479	0.264973	0.79103	0.889299	0.580952	0.376294	1.54388	0.122617	0.248993	-0.147411	0.376965	-0.391048	0.695762	0.829671	0.641537	0.379292	1.6914	0.0907598	0.205489	0.250794	0.378118	0.663269	0.507158	1	-0.599733
Adra1d	ENSRNOG00000021256	adrenoceptor alpha 1D [Source:RGD Symbol;Acc:62064]	620.874	0.498277	0.270816	1.83991	0.0657819	0.32068	1.03379	0.266655	-3.87688	0.000105806	0.00220985	1.61472	0.269086	-6.00076	1.96399e-09	3.12808e-07	-0.0826555	0.264894	-0.312032	0.755016	0.961256	-0.416168	0.264124	-1.57566	0.115105	0.25324	0.228594	0.267764	0.853715	0.393263	0.565249	-0.242949	0.263804	-0.920942	0.357081	0.554416	-0.429001	0.27021	-1.58766	0.112363	0.241242	-0.159319	0.26715	-0.596366	0.550931	1	-1.67855
Adra2a	ENSRNOG00000047545	adrenoceptor alpha 2A [Source:RGD Symbol;Acc:2056]	386.145	-0.521928	0.301255	-1.73251	0.0831825	0.357332	-0.115389	0.302546	0.381392	0.702912	0.868951	-0.556371	0.301682	1.84423	0.0651499	0.259173	-0.0809457	0.302971	-0.267173	0.789336	0.971412	0.557568	0.303539	1.83689	0.0662258	0.168269	-0.380812	0.300484	-1.26733	0.205039	0.360302	0.272717	0.30199	0.903067	0.366491	0.563425	0.288931	0.300341	0.962009	0.336045	0.517929	0.147815	0.299568	0.493427	0.621711	1	1.05377
Adra2b	ENSRNOG00000013887	adrenoceptor alpha 2B [Source:RGD Symbol;Acc:2057]	30.7488	-0.239294	0.375198	-0.637781	0.523616	0.802145	0.558908	0.375535	-1.4883	0.136673	0.35593	-0.13788	0.375122	0.367561	0.713201	0.898536	0.457494	0.375459	1.21849	0.223037	0.679817	0.278015	0.375992	0.739417	0.459654	0.64435	-0.391093	0.375915	-1.04038	0.298165	0.467359	-0.199458	0.375757	-0.530816	0.595546	0.757236	0.164059	0.37558	0.436816	0.662245	0.797805	0.315858	0.376296	0.839387	0.401252	1	0.1102
Adra2c	ENSRNOG00000009299	adrenoceptor alpha 2C [Source:RGD Symbol;Acc:2058]	979.169	0.406454	0.230658	1.76215	0.0780435	0.34434	-0.799016	0.231401	3.45295	0.000554499	0.00788614	-0.97437	0.23357	4.17164	3.02418e-05	0.00114413	0.581808	0.234303	2.48314	0.013023	0.235407	-0.169175	0.231887	-0.729558	0.46566	0.649864	0.0332894	0.229339	0.145153	0.88459	0.932788	-0.642129	0.233071	-2.75508	0.00586772	0.0254803	-0.546478	0.230226	-2.37366	0.017613	0.0565303	-0.173313	0.228905	-0.75714	0.448966	1	0.596551
Adrb1	ENSRNOG00000017002	adrenoceptor beta 1 [Source:RGD Symbol;Acc:2059]	406.208	-0.0747624	0.281379	-0.2657	0.79047	0.933647	0.369179	0.27963	-1.32024	0.186753	0.432873	0.993308	0.277802	-3.5756	0.00034943	0.00762775	-0.698891	0.276027	-2.53197	0.0113424	0.219144	-1.47979	0.273603	-5.40854	6.35407e-08	9.28511e-07	-1.2527	0.274665	-4.56084	5.09488e-06	4.33469e-05	-0.900838	0.269976	-3.33673	0.000847692	0.00488462	-1.3361	0.275888	-4.84292	1.27945e-06	1.29076e-05	-0.158161	0.269018	-0.587922	0.556585	1	-0.596267
Adrb2	ENSRNOG00000019217	adrenoceptor beta 2, surface [Source:RGD Symbol;Acc:2060]	63.5761	-0.21975	0.431814	-0.508899	0.610823	0.852151	0.319293	0.43137	-0.740184	0.459188	0.703676	-0.0210081	0.431723	0.0486612	0.961189	0.99938	0.120551	0.431279	0.279521	0.779845	0.970222	-0.727937	0.427966	-1.70092	0.0889573	0.210027	-1.10785	0.427683	-2.59035	0.0095878	0.0332111	-0.930268	0.42761	-2.1755	0.0295924	0.0935104	-0.919556	0.42808	-2.14809	0.0317064	0.0913903	-0.0314558	0.423868	-0.0742113	0.940842	1	0.0606203
Adrb3	ENSRNOG00000012674	adrenoceptor beta 3 [Source:RGD Symbol;Acc:2061]	2.92835	0.154388	0.102218	1.51038	0.130946	NA	-0.154391	0.102222	1.51035	0.130954	NA	0	0.10215	0	1	NA	0	0.102155	0	1	NA	0	0.102236	0	1	NA	0.121549	0.102363	1.18743	0.235058	NA	0	0.102285	0	1	NA	0	0.10225	0	1	NA	0.0329373	0.102395	0.321669	0.747703	1	0.0329239
Adrbk1	ENSRNOG00000018985	adrenergic, beta, receptor kinase 1 [Source:RGD Symbol;Acc:2062]	1843.03	-0.107209	0.183409	-0.584531	0.558863	0.82275	0.351384	0.183099	-1.9191	0.0549718	0.204202	0.0896532	0.183382	-0.488889	0.62492	0.850396	0.154523	0.183071	0.84406	0.398636	0.81918	0.0826156	0.182625	0.452379	0.650996	0.795963	-0.215567	0.182612	-1.18047	0.237815	0.400327	0.054733	0.182667	0.299632	0.764458	0.871578	-0.230925	0.182803	-1.26324	0.206502	0.372786	-0.122567	0.182003	-0.673433	0.500672	1	-0.0532021
Adrbk2	ENSRNOG00000059456	adrenergic, beta, receptor kinase 2 [Source:RGD Symbol;Acc:2063]	123.73	-0.3219	0.403158	-0.798446	0.424611	0.731751	-0.337022	0.404942	0.832273	0.405255	0.659253	-0.999956	0.405693	2.46481	0.0137086	0.0983621	0.341034	0.407459	0.836979	0.402604	0.822405	-0.441186	0.404267	-1.09132	0.27513	0.463983	-0.271834	0.401968	-0.676258	0.498877	0.659856	-0.851805	0.404721	-2.10467	0.0353201	0.107062	-0.350992	0.401473	-0.874262	0.381976	0.563636	-0.401058	0.400275	-1.00196	0.316365	1	0.16767
Adrm1	ENSRNOG00000055984	adhesion regulating molecule 1 [Source:RGD Symbol;Acc:69248]	2121.37	0.0748777	0.177686	0.421404	0.67346	0.883365	-0.295433	0.17793	1.6604	0.096835	0.290175	-0.300049	0.178251	1.68329	0.092318	0.318533	0.0794931	0.178493	0.445356	0.656062	0.935561	-0.337204	0.177719	-1.8974	0.0577758	0.152061	-0.145808	0.176929	-0.824101	0.409882	0.57974	-0.387241	0.177602	-2.18038	0.029229	0.0925362	-0.134323	0.17739	-0.757216	0.44892	0.625344	0.0863624	0.176632	0.48894	0.624884	1	0.104037
Adsl	ENSRNOG00000018655	adenylosuccinate lyase [Source:RGD Symbol;Acc:1307617]	1496.27	-0.29948	0.213472	-1.4029	0.160645	0.487029	0.282319	0.213471	-1.32252	0.185997	0.432188	0.0159332	0.213259	-0.0747131	0.940443	0.994045	-0.0330947	0.213258	-0.155186	0.876675	0.989168	-0.788629	0.212127	-3.71771	0.000201035	0.00137071	-1.08983	0.212	-5.14072	2.73695e-07	3.02882e-06	-0.709025	0.211844	-3.34692	0.000817147	0.00474557	-0.716521	0.212095	-3.37831	0.000729329	0.00388387	0.0738284	0.210612	0.350542	0.725932	1	0.0188821
Adss	ENSRNOG00000004481	adenylosuccinate synthase [Source:RGD Symbol;Acc:1310508]	1140.05	0.280284	0.219	1.27983	0.200604	0.537385	0.0865295	0.21833	-0.396325	0.691865	0.862628	0.435996	0.219022	-1.99065	0.046519	0.212515	-0.0691829	0.218351	-0.316843	0.751363	0.960303	-0.254612	0.217707	-1.16952	0.242195	0.428107	-0.31032	0.217305	-1.42804	0.153281	0.291939	-0.220693	0.2173	-1.01562	0.309813	0.50511	-0.455283	0.218432	-2.08432	0.0371311	0.103681	0.135321	0.216732	0.62437	0.532384	1	-0.030822
Adtrp	ENSRNOG00000014481	androgen-dependent TFPI-regulating protein [Source:RGD Symbol;Acc:1305679]	18.8813	-0.272521	0.408174	-0.667658	0.504352	0.79036	0.828867	0.409433	-2.02443	0.0429264	0.174345	-0.243845	0.407787	0.597972	0.549859	0.804216	0.800191	0.409047	1.95623	0.0504377	0.416262	0.352059	0.410868	0.856867	0.391519	0.581529	-0.602986	0.410125	-1.47025	0.141494	0.275003	-0.59936	0.409728	-1.46283	0.143515	0.300395	-0.320148	0.409944	-0.780956	0.434828	0.612846	0.0103171	0.411889	0.0250482	0.980016	1	0.126179
Aebp1	ENSRNOG00000013720	AE binding protein 1 [Source:RGD Symbol;Acc:1306922]	739.303	0.288526	0.307766	0.937484	0.348509	0.676446	-1.01455	0.308511	3.28854	0.0010071	0.0124555	-0.245911	0.308255	0.797753	0.425014	0.718154	-0.480112	0.308999	-1.55377	0.12024	0.579548	0.494881	0.309611	1.59839	0.109955	0.244863	0.957322	0.307749	3.11073	0.00186627	0.00817313	1.34683	0.309325	4.3541	1.33612e-05	0.00012697	0.579537	0.308111	1.88094	0.0599802	0.150598	-0.0892594	0.308093	-0.289715	0.772034	1	0.552107
Aebp2	ENSRNOG00000008929	AE binding protein 2 [Source:RGD Symbol;Acc:1307233]	169.77	0.661033	0.426127	1.55126	0.12084	0.426572	-0.401244	0.425533	0.942921	0.345721	0.607307	-0.0880756	0.427694	0.205932	0.836844	0.954312	0.347864	0.427105	0.81447	0.415376	0.830347	-1.03731	0.4247	-2.44247	0.0145873	0.05163	-0.621568	0.423487	-1.46774	0.142175	0.275977	-1.50271	0.425012	-3.5357	0.000406701	0.00258741	-1.34624	0.425189	-3.16622	0.00154434	0.00734746	-0.0636421	0.422537	-0.150619	0.880276	1	-0.0145022
Aen	ENSRNOG00000018421	apoptosis enhancing nuclease [Source:RGD Symbol;Acc:1305051]	346.854	0.0241387	0.349684	0.0690301	0.944966	0.990055	-0.167688	0.349881	0.479272	0.631745	0.827738	-0.644223	0.351022	1.83528	0.0664647	0.262703	0.500674	0.351218	1.42554	0.154003	0.617384	0.25283	0.350123	0.722119	0.470222	0.653501	0.222738	0.349058	0.638112	0.523401	0.679352	-0.388941	0.350499	-1.10968	0.267139	0.458693	0.0510922	0.349399	0.146229	0.883741	0.938313	-0.147507	0.348772	-0.422932	0.672345	1	0.197781
Aes	ENSRNOG00000052025	amino-terminal enhancer of split [Source:RGD Symbol;Acc:2731]	24041.8	0.244465	0.119612	2.04382	0.0409717	0.257619	-0.417667	0.119633	3.49122	0.000480813	0.00705286	-0.203797	0.11968	1.70285	0.0885969	0.310764	0.0305952	0.119702	0.255595	0.798264	0.97243	0.33474	0.119689	2.79674	0.00516203	0.02194	0.822343	0.119598	6.8759	6.15994e-12	1.30705e-10	0.307795	0.119662	2.5722	0.0101055	0.0396894	0.566681	0.119662	4.7357	2.18298e-06	2.13247e-05	-0.0111968	0.119647	-0.0935818	0.925441	1	-0.069936
Afap1	ENSRNOG00000060665	actin filament associated protein 1 [Source:RGD Symbol;Acc:619959]	255.583	0.999355	0.318379	3.13889	0.00169589	0.0456828	-0.81201	0.317757	2.55544	0.0106053	0.0687882	0.353459	0.319833	-1.10514	0.269101	0.570119	-0.166114	0.319215	-0.520382	0.602797	0.911926	0.730548	0.320572	2.27889	0.0226735	0.0732524	1.35762	0.317413	4.27715	1.89305e-05	0.000141525	1.0262	0.319887	3.20799	0.00133666	0.00724407	0.29138	0.32016	0.910107	0.362766	0.544864	-0.0668848	0.3192	-0.209539	0.834028	1	0.184938
Afap1l1	ENSRNOG00000019403	actin filament associated protein 1-like 1 [Source:RGD Symbol;Acc:1311580]	153.969	0.0663948	0.409457	0.162153	0.871185	0.966726	-0.573052	0.410637	1.39552	0.162859	0.396352	0.377258	0.409243	-0.921844	0.35661	0.658644	-0.883916	0.410425	-2.15366	0.0312667	0.346791	-0.820977	0.409981	-2.00248	0.0452335	0.126312	0.153498	0.408424	0.37583	0.707044	0.821099	0.111535	0.407805	0.273501	0.784468	0.883363	0.0433851	0.409117	0.106046	0.915546	0.955379	-0.0437181	0.408082	-0.10713	0.914685	1	-0.401422
Afap1l2	ENSRNOG00000017164	actin filament associated protein 1-like 2 [Source:RGD Symbol;Acc:1310668]	145.659	0.395534	0.431618	0.916398	0.359458	0.686417	-0.145779	0.431282	0.338014	0.735353	0.887446	0.114599	0.432072	-0.265231	0.790831	0.933296	0.135156	0.431736	0.313051	0.754242	0.960872	-0.183364	0.43107	-0.425369	0.670568	0.810477	-0.00775646	0.430541	-0.0180156	0.985626	0.991902	0.115725	0.431341	0.268292	0.788474	0.885755	-0.163767	0.43153	-0.379502	0.704315	0.825753	0.239524	0.430453	0.556446	0.577906	1	-0.0298281
Aff1	ENSRNOG00000002232	AF4/FMR2 family, member 1 [Source:RGD Symbol;Acc:1307940]	127.05	2.76298	0.426597	6.47679	9.36919e-11	4.65005e-07	-0.199799	0.418508	0.477408	0.633071	0.828602	1.79382	0.428153	-4.18966	2.79368e-05	0.00108558	0.769364	0.420125	1.83127	0.0670601	0.47322	0.399644	0.418909	0.95401	0.340078	0.532287	1.24137	0.419063	2.96226	0.0030539	0.0124871	-0.328481	0.41988	-0.782321	0.434026	0.62809	-1.68725	0.427471	-3.94705	7.91186e-05	0.000549506	-0.165644	0.419969	-0.394419	0.693271	1	-0.64193
Aff3	ENSRNOG00000018830	AF4/FMR2 family, member 3 [Source:RGD Symbol;Acc:1308527]	337.428	0.423174	0.349588	1.2105	0.226089	0.563267	-0.461458	0.349621	1.31988	0.186875	0.432873	0.103997	0.350145	-0.297011	0.766458	0.923393	-0.14228	0.350178	-0.406308	0.684517	0.944986	0.92032	0.351287	2.61985	0.00879677	0.0343369	0.726393	0.349049	2.08106	0.0374281	0.100133	0.789274	0.350191	2.25383	0.0242066	0.0798844	0.503856	0.350281	1.43844	0.15031	0.299116	0.200638	0.349743	0.573672	0.56619	1	0.655385
Aff4	ENSRNOG00000006965	AF4/FMR2 family, member 4 [Source:RGD Symbol;Acc:1311694]	3801.72	-0.050078	0.16189	-0.309334	0.757068	0.919598	-0.25406	0.162067	1.56762	0.11697	0.32352	-0.140948	0.162024	0.869921	0.384344	0.684486	-0.16319	0.162201	-1.0061	0.314368	0.762807	0.213938	0.162188	1.31908	0.187143	0.359139	0.360884	0.161748	2.23115	0.0256711	0.0739423	0.284801	0.161904	1.75907	0.0785661	0.194018	0.258066	0.161832	1.59465	0.11079	0.238487	-0.152895	0.16169	-0.945609	0.344348	1	0.107114
Afg3l1	ENSRNOG00000026994	AFG3(ATPase family gene 3)-like 1 (S. cerevisiae) [Source:RGD Symbol;Acc:1309722]	422.214	-0.473868	0.33666	-1.40756	0.159262	0.485486	0.728404	0.336275	-2.16609	0.0303041	0.138939	-0.0783544	0.336303	0.232987	0.815771	0.944304	0.33289	0.335919	0.990983	0.321694	0.769021	0.207894	0.335264	0.620091	0.535198	0.70721	-0.621575	0.335671	-1.85174	0.0640633	0.152319	-0.121367	0.335441	-0.361814	0.717491	0.844156	0.129078	0.335721	0.38448	0.700623	0.823618	0.276785	0.334729	0.826893	0.408298	1	0.101066
Afg3l2	ENSRNOG00000017965	AFG3-like AAA ATPase 2 [Source:RGD Symbol;Acc:1305259]	1264.82	0.134512	0.213148	0.631076	0.527991	0.805567	0.0603536	0.21282	-0.28359	0.776725	0.910139	0.420833	0.213014	-1.97561	0.0481991	0.217532	-0.225967	0.212686	-1.06244	0.288035	0.741776	-0.15426	0.212354	-0.726429	0.467576	0.651837	-0.475396	0.211718	-2.24542	0.0247411	0.0718005	-0.143081	0.211639	-0.67606	0.499003	0.683896	-0.357021	0.212583	-1.67944	0.0930655	0.209402	0.252887	0.211149	1.19767	0.231044	1	0.260782
Afm	ENSRNOG00000002878	afamin [Source:RGD Symbol;Acc:628614]	1.62008	0	0.143793	0	1	NA	0	0.143816	0	1	NA	0.207377	0.14383	-1.44182	0.149353	NA	-0.207402	0.143852	-1.44177	0.149368	NA	-0.0321755	0.144066	-0.223338	0.823272	NA	-0.0554881	0.144549	-0.383869	0.701075	NA	0.177782	0.144538	1.23	0.218699	NA	-0.0462604	0.144148	-0.320924	0.748268	NA	0.00882962	0.144903	0.0609348	0.951411	1	0.0229385
Afmid	ENSRNOG00000050205	arylformamidase [Source:RGD Symbol;Acc:1591143]	207.429	-0.4182	0.316189	-1.32263	0.185959	0.518288	0.341719	0.316376	-1.08011	0.280095	0.539338	-0.37639	0.316642	1.18869	0.234561	0.530499	0.29991	0.316829	0.946598	0.343843	0.778645	0.0571732	0.314931	0.181542	0.855942	0.925005	-0.0327353	0.315331	-0.103813	0.917318	0.953206	0.136523	0.316219	0.431735	0.665934	0.809184	0.47858	0.31535	1.51762	0.129111	0.266971	0.0931153	0.314489	0.296085	0.767166	1	-0.251811
Afp	ENSRNOG00000002889	alpha-fetoprotein [Source:RGD Symbol;Acc:2065]	3.35937	0	0.184245	0	1	NA	0	0.184269	0	1	NA	0.226857	0.184305	-1.23087	0.21837	NA	-0.226892	0.184329	-1.23091	0.218358	NA	-0.0884187	0.184586	-0.479012	0.63193	NA	-0.180996	0.185146	-0.977584	0.32828	NA	0.0905298	0.185145	0.488967	0.624865	NA	-0.24689	0.184781	-1.33612	0.181509	NA	-0.0664744	0.185681	-0.358003	0.720341	1	0.0920322
Aftph	ENSRNOG00000005411	aftiphilin [Source:RGD Symbol;Acc:1311920]	1213.35	0.339667	0.224531	1.51279	0.130334	0.442319	-0.382244	0.224563	1.70217	0.0887232	0.275201	0.238168	0.224774	-1.05959	0.289333	0.591738	-0.280745	0.224806	-1.24883	0.211727	0.669727	0.18197	0.224868	0.809229	0.418383	0.606666	0.515628	0.223977	2.30214	0.0213272	0.063909	0.349757	0.224195	1.56006	0.118746	0.262559	0.321923	0.224825	1.43188	0.152177	0.301517	0.145962	0.224272	0.650826	0.515159	1	0.0485865
Aga	ENSRNOG00000000108	aspartylglucosaminidase [Source:RGD Symbol;Acc:1309646]	489.457	-1.08339	0.287186	-3.77244	0.000161656	0.0109354	0.31442	0.288759	-1.08886	0.276213	0.535461	-0.342565	0.285908	1.19816	0.230853	0.525263	-0.42641	0.287489	-1.48322	0.138016	0.601357	-0.577647	0.286643	-2.01522	0.043882	0.123425	-0.559701	0.286933	-1.95063	0.0511012	0.127836	0.0522434	0.285521	0.182976	0.854817	0.924537	0.353413	0.285126	1.2395	0.215161	0.383921	-0.170281	0.284871	-0.597746	0.550009	1	-0.332366
Agap1	ENSRNOG00000019476	ArfGAP with GTPase domain, ankyrin repeat and PH domain 1 [Source:RGD Symbol;Acc:1309244]	3402.69	0.00712173	0.140208	0.050794	0.95949	0.993045	-0.556922	0.140552	3.96238	7.42059e-05	0.00171645	-0.796704	0.140803	5.6583	1.52879e-08	1.95276e-06	0.246903	0.141146	1.74928	0.0802424	0.50241	1.03735	0.141518	7.33014	2.29921e-13	7.48237e-12	1.06407	0.140432	7.57716	3.53193e-14	1.01971e-12	0.791576	0.1415	5.59419	2.21656e-08	3.51154e-07	0.994659	0.140568	7.07599	1.48388e-12	3.57289e-11	-0.062294	0.140791	-0.442456	0.65816	1	0.530195
Agap2	ENSRNOG00000025584	ArfGAP with GTPase domain, ankyrin repeat and PH domain 2 [Source:RGD Symbol;Acc:628844]	2250.23	-0.0384319	0.223157	-0.172219	0.863265	0.963976	0.269467	0.223062	-1.20803	0.227034	0.47931	-0.0125716	0.22321	0.0563221	0.955085	0.998056	0.243607	0.223115	1.09185	0.274901	0.730796	2.44473	0.224465	10.8914	1.26733e-27	2.38436e-25	2.1349	0.22423	9.52102	1.71483e-21	1.14894e-19	2.29055	0.224482	10.2037	1.90853e-24	2.49275e-22	1.99879	0.224181	8.91597	4.83567e-19	2.24113e-17	-0.174543	0.225249	-0.774887	0.438406	1	0.0403592
Agap3	ENSRNOG00000012764	ArfGAP with GTPase domain, ankyrin repeat and PH domain 3 [Source:RGD Symbol;Acc:1310751]	7984.42	0.235025	0.0979665	2.39903	0.0164386	0.159885	-0.127202	0.0978961	1.29936	0.193822	0.440365	-0.0744575	0.0981945	0.758266	0.448292	0.735129	0.18228	0.0981242	1.85765	0.0632189	0.465014	0.184337	0.0979299	1.88234	0.0597905	0.156097	0.286186	0.0976634	2.93033	0.00338606	0.0136327	-0.024115	0.0979046	-0.246311	0.805442	0.896248	0.0499839	0.0979459	0.510322	0.609826	0.759234	-0.00117707	0.0976426	-0.0120549	0.990382	1	0.0253532
Agbl4	ENSRNOG00000008011	ATP/GTP binding protein-like 4 [Source:RGD Symbol;Acc:6493177]	40.3343	-0.458367	0.430943	-1.06364	0.287493	0.623584	0.0470303	0.432434	-0.108757	0.913395	0.970641	-0.041212	0.430102	0.0958191	0.923664	0.98894	-0.370125	0.431601	-0.857562	0.391134	0.817375	0.15706	0.432021	0.363547	0.716196	0.841231	-0.195307	0.429642	-0.45458	0.649411	0.779049	0.414384	0.429451	0.964916	0.334587	0.530738	0.496767	0.42993	1.15546	0.247902	0.422421	0.233707	0.428622	0.545252	0.58558	1	0.305336
Agbl5	ENSRNOG00000008612	ATP/GTP binding protein-like 5 [Source:RGD Symbol;Acc:1598311]	149.37	-0.725611	0.445516	-1.6287	0.103377	0.399987	0.721059	0.445504	-1.61853	0.105549	0.305391	0.059473	0.444883	-0.133682	0.893654	0.979463	-0.0640256	0.44487	-0.14392	0.885564	0.990046	-0.628224	0.444256	-1.4141	0.157331	0.317368	-1.43708	0.444619	-3.23216	0.00122857	0.00568535	-0.129022	0.444247	-0.290429	0.771488	0.875783	-0.51169	0.44427	-1.15175	0.249422	0.424121	0.199781	0.443365	0.450602	0.652276	1	0.0877991
Ager	ENSRNOG00000000439	advanced glycosylation end product-specific receptor [Source:RGD Symbol;Acc:69258]	25.8127	-1.20183	0.414898	-2.89669	0.00377126	0.0718173	0.312388	0.413575	-0.755335	0.450048	0.697225	-1.05523	0.414846	2.54366	0.0109699	0.0849476	0.165783	0.413523	0.400904	0.688491	0.945951	-0.172441	0.41472	-0.415802	0.677555	0.815245	-0.445537	0.414823	-1.07404	0.282804	0.451081	-0.590906	0.415045	-1.42371	0.154529	0.316076	0.728848	0.416157	1.75138	0.0798809	0.187219	-0.027445	0.416082	-0.0659607	0.947409	1	-0.0392924
Agfg1	ENSRNOG00000015619	ArfGAP with FG repeats 1 [Source:RGD Symbol;Acc:1560041]	1903.61	-0.0469842	0.155384	-0.302375	0.762366	0.922688	-0.246534	0.155666	1.58374	0.113254	0.317842	-0.207719	0.155672	1.33434	0.182092	0.466065	-0.0857992	0.155953	-0.55016	0.58221	0.905431	0.894875	0.156641	5.71292	1.11055e-08	1.83683e-07	1.41267	0.156325	9.03671	1.61463e-19	8.92607e-18	0.890904	0.156151	5.70539	1.16075e-08	1.92178e-07	1.16713	0.156182	7.4729	7.84459e-14	2.16349e-12	-0.29252	0.157118	-1.86179	0.0626332	1	-0.271257
Agfg2	ENSRNOG00000001404	ArfGAP with FG repeats 2 [Source:RGD Symbol;Acc:1306590]	1332.48	-0.355458	0.192225	-1.84917	0.0644328	0.317854	-0.389616	0.193282	2.01579	0.0438216	0.17656	-0.546913	0.1927	2.83816	0.00453739	0.0471692	-0.198161	0.193754	-1.02275	0.306428	0.756139	0.0638609	0.19356	0.329929	0.741453	0.856811	0.145504	0.192026	0.757729	0.448613	0.614323	0.105675	0.192696	0.548401	0.583417	0.748289	0.481449	0.191999	2.50756	0.0121567	0.0418625	-0.019513	0.1918	-0.101736	0.918966	1	0.307973
Agk	ENSRNOG00000011509	acylglycerol kinase [Source:RGD Symbol;Acc:1562046]	796.14	-1.24004	0.24277	-5.10787	3.25812e-07	0.000156924	0.840994	0.243408	-3.45508	0.000550129	0.00785943	-0.167522	0.240913	0.695365	0.486827	0.76281	-0.231519	0.241557	-0.958445	0.337838	0.775148	-0.0954254	0.241194	-0.395637	0.692373	0.82586	-1.05152	0.242147	-4.34248	1.40885e-05	0.000108892	0.123538	0.240435	0.513811	0.607384	0.76558	0.0312088	0.240129	0.129967	0.896593	0.945	-0.15731	0.239499	-0.656832	0.511289	1	0.115096
Agl	ENSRNOG00000016214	amylo-alpha-1, 6-glucosidase, 4-alpha-glucanotransferase [Source:RGD Symbol;Acc:1306376]	459.175	-0.578828	0.294856	-1.96309	0.0496361	0.281123	0.195267	0.295367	-0.661098	0.508549	0.740717	-0.516483	0.295023	1.75065	0.0800055	0.293077	0.132922	0.295533	0.449768	0.652877	0.934635	1.07413	0.296562	3.62196	0.000292384	0.00187565	0.498925	0.295402	1.68897	0.091225	0.199613	1.17943	0.296876	3.97282	7.10281e-05	0.000566826	1.24188	0.295391	4.20419	2.62021e-05	0.000202902	0.164126	0.295935	0.554602	0.579167	1	0.379943
Agmat	ENSRNOG00000012315	agmatine ureohydrolase (agmatinase) [Source:RGD Symbol;Acc:1308424]	25.2067	-0.0487169	0.408553	-0.119243	0.905083	0.977775	-0.0410091	0.408454	0.100401	0.920026	0.973085	0.0172692	0.408431	-0.0422817	0.966274	1	-0.106995	0.408332	-0.26203	0.793299	0.97147	0.449839	0.408135	1.10218	0.270383	0.458353	0.413616	0.408835	1.01169	0.311684	0.481932	0.546964	0.408593	1.33865	0.180684	0.352001	0.144935	0.408801	0.354537	0.722937	0.839443	-0.317398	0.409082	-0.775878	0.437821	1	0.0772321
Agmo	ENSRNOG00000023116	alkylglycerol monooxygenase [Source:RGD Symbol;Acc:1312038]	36.9209	0.55739	0.441958	1.26118	0.207243	0.545591	-0.421106	0.44223	0.952232	0.340979	0.603543	0.864993	0.442088	-1.95661	0.0503936	0.223286	-0.728709	0.44236	-1.64732	0.0994922	0.541519	-0.641873	0.442618	-1.45017	0.14701	0.302599	-0.0712802	0.443558	-0.160701	0.872329	0.925639	0.0857937	0.44377	0.193329	0.846701	0.920214	-0.714329	0.442378	-1.61475	0.106365	0.231509	-0.0856595	0.443976	-0.192937	0.847008	1	-0.149487
Ago1	ENSRNOG00000055915	argonaute RISC catalytic component 1 [Source:RGD Symbol;Acc:1304619]	1360.74	0.138103	0.172397	0.801075	0.423088	0.730276	-0.0513738	0.172253	0.298245	0.765516	0.904043	0.0980032	0.172634	-0.567695	0.570242	0.818775	-0.0112743	0.172491	-0.0653618	0.947886	0.998016	0.821845	0.173095	4.74796	2.05483e-06	2.21308e-05	0.649198	0.172157	3.77096	0.000162622	0.000951047	0.748306	0.172626	4.33485	1.4586e-05	0.000137167	0.596192	0.17287	3.44879	0.000563114	0.00309086	0.0850974	0.172631	0.492943	0.622053	1	0.224021
Ago2	ENSRNOG00000008533	argonaute RISC catalytic component 2 [Source:RGD Symbol;Acc:621255]	391.25	-0.136255	0.314909	-0.432681	0.665246	0.880342	-1.13082	0.320067	3.53306	0.000410782	0.00627303	-0.418118	0.316166	1.32246	0.186014	0.471652	-0.848954	0.3213	-2.64225	0.00823584	0.19013	-1.61685	0.318744	-5.07258	3.92462e-07	4.96391e-06	-0.925576	0.312385	-2.96293	0.00304724	0.0124681	-0.862001	0.314083	-2.7445	0.00606026	0.0261521	-0.885385	0.312791	-2.8306	0.00464611	0.0189221	-0.0960638	0.310247	-0.309637	0.756837	1	0.439539
Ago3	ENSRNOG00000034269	argonaute RISC catalytic component 3 [Source:RGD Symbol;Acc:1309163]	95.7327	0.0269554	0.442699	0.0608888	0.951448	0.991061	0.156989	0.442392	-0.354865	0.722691	0.880291	-0.177119	0.443253	0.399589	0.689459	0.887353	0.361064	0.442947	0.81514	0.414992	0.830286	-0.0859219	0.441852	-0.194459	0.845817	0.91953	-0.546217	0.441268	-1.23783	0.215778	0.373768	-0.972409	0.441696	-2.20154	0.0276981	0.0889351	-0.543967	0.441825	-1.23118	0.218255	0.387814	0.0292053	0.440386	0.0663176	0.947125	1	0.303306
Ago4	ENSRNOG00000025596	argonaute RISC catalytic component 4 [Source:RGD Symbol;Acc:1304583]	33.2004	-0.11849	0.433163	-0.273546	0.784433	0.931714	-0.464742	0.432218	1.07525	0.282263	0.541665	0.595985	0.4337	-1.37419	0.169384	0.448622	-1.17922	0.432756	-2.7249	0.00643205	0.172597	-0.570455	0.432573	-1.31875	0.187253	0.359214	-0.296392	0.434052	-0.682849	0.494702	0.65643	0.634425	0.434384	1.46051	0.144149	0.3014	-0.129049	0.433734	-0.29753	0.766062	0.866423	0.0488533	0.434622	0.112404	0.910503	1	0.190679
Agpat1	ENSRNOG00000000437	1-acylglycerol-3-phosphate O-acyltransferase 1 [Source:RGD Symbol;Acc:1303287]	4099.67	0.0658535	0.129854	0.507134	0.612061	0.852792	-0.0836728	0.129854	0.644358	0.519343	0.748659	-0.0325899	0.130009	0.250673	0.802067	0.937865	0.0147706	0.13001	0.113612	0.909546	0.994357	0.564444	0.130108	4.33827	1.43609e-05	0.000129917	0.583701	0.129744	4.49888	6.83109e-06	5.62174e-05	0.669254	0.130041	5.14648	2.65419e-07	3.56165e-06	0.497328	0.129982	3.82614	0.00013017	0.000858148	-0.0205195	0.129871	-0.157999	0.874458	1	0.0644159
Agpat2	ENSRNOG00000019466	1-acylglycerol-3-phosphate O-acyltransferase 2 [Source:RGD Symbol;Acc:1309229]	15.2362	0.842923	0.345274	2.44131	0.0146339	0.149084	-0.843124	0.345314	2.44161	0.0146217	0.085344	0	0.343715	0	1	1	0	0.343755	0	1	1	-0.616275	0.345317	-1.78467	0.0743154	0.183367	0.483984	0.347025	1.39467	0.163117	0.305794	-0.537045	0.345627	-1.55383	0.120225	NA	-0.437389	0.3452	-1.26706	0.205134	0.371132	-0.0784493	0.34695	-0.226111	0.821115	1	-0.257135
Agpat3	ENSRNOG00000001205	1-acylglycerol-3-phosphate O-acyltransferase 3 [Source:RGD Symbol;Acc:1305787]	2949.1	0.137012	0.151906	0.901953	0.367082	0.692578	0.191689	0.151623	-1.26425	0.206141	0.455218	0.385038	0.151856	-2.53554	0.0112273	0.0864222	-0.0563372	0.151573	-0.371685	0.710127	0.951365	0.584451	0.151739	3.85168	0.000117308	0.000853997	0.377672	0.151551	2.49205	0.0127008	0.0419436	0.747366	0.151611	4.92948	8.24469e-07	1.00745e-05	0.344135	0.152008	2.26393	0.0235781	0.0720374	0.103476	0.151652	0.682323	0.495035	1	0.0150907
Agpat4	ENSRNOG00000017731	1-acylglycerol-3-phosphate O-acyltransferase 4 [Source:RGD Symbol;Acc:619916]	2047.5	-0.274766	0.173088	-1.58744	0.112413	0.41242	0.47013	0.172809	-2.72052	0.00651791	0.0485954	0.44099	0.172468	-2.55694	0.0105598	0.0831186	-0.245626	0.172188	-1.4265	0.153724	0.617073	-0.210702	0.171883	-1.22585	0.220257	0.400742	-0.808354	0.171921	-4.70188	2.57771e-06	2.34524e-05	0.0871901	0.171438	0.508582	0.611045	0.768629	-0.435375	0.172067	-2.53027	0.0113976	0.0397143	0.098212	0.170893	0.574698	0.565496	1	0.127522
Agpat5	ENSRNOG00000028623	1-acylglycerol-3-phosphate O-acyltransferase 5 [Source:RGD Symbol;Acc:1306405]	1113.01	0.103033	0.199842	0.515571	0.606154	0.84918	-0.17971	0.199961	0.898726	0.368799	0.627077	0.45528	0.19959	-2.28107	0.0225442	0.134774	-0.531957	0.19971	-2.66365	0.0077298	0.184792	-0.343463	0.199451	-1.72204	0.0850615	0.203099	-0.098175	0.198518	-0.49454	0.620925	0.756848	0.13281	0.198173	0.670172	0.502748	0.686986	-0.370167	0.199108	-1.85913	0.0630082	0.156385	-0.16896	0.197778	-0.85429	0.392945	1	-0.0655782
Agpat6	NA	NA	1287.21	-0.189071	0.194225	-0.973467	0.330321	0.661271	0.401066	0.193861	-2.06884	0.0385615	0.162151	0.268282	0.193819	-1.38419	0.1663	0.445049	-0.0562868	0.193454	-0.290957	0.771084	0.966889	0.20299	0.19328	1.05024	0.293609	0.483566	-0.636241	0.19287	-3.29881	0.000970965	0.00462879	0.0630119	0.192701	0.326994	0.743673	0.860251	-0.305841	0.193231	-1.58278	0.113472	0.242867	0.141329	0.191869	0.736592	0.46137	1	0.438164
Agpat9	NA	NA	57.7795	0.259205	0.436641	0.593635	0.552756	0.820645	-0.194891	0.436757	0.446223	0.655436	0.841902	0.501815	0.436708	-1.14909	0.25052	0.549398	-0.437501	0.436824	-1.00155	0.316561	0.764306	-1.29684	0.437602	-2.96352	0.00304147	0.014261	-0.695104	0.438067	-1.58675	0.112569	0.23296	-0.902315	0.438301	-2.05866	0.0395264	0.116526	-1.01781	0.437388	-2.32702	0.0199641	0.062689	-0.0635028	0.438811	-0.144715	0.884936	1	-0.406847
Agps	ENSRNOG00000001547	alkylglycerone phosphate synthase [Source:RGD Symbol;Acc:620364]	105.276	0.0807659	0.426902	0.189191	0.849943	0.958269	0.39351	0.425701	-0.92438	0.355289	0.617096	0.234382	0.426944	-0.548977	0.583021	0.826818	0.239893	0.425744	0.563468	0.573116	0.901758	0.160538	0.424808	0.377908	0.705499	0.835045	-0.896983	0.42395	-2.11578	0.0343639	0.0937046	-0.641421	0.424135	-1.5123	0.130456	0.280247	-1.00132	0.424973	-2.35619	0.0184632	0.0586636	-0.0235692	0.421993	-0.0558521	0.95546	1	0.664012
Agr2	ENSRNOG00000005023	anterior gradient 2, protein disulphide isomerase family member [Source:RGD Symbol;Acc:1304606]	3.76793	0	0.216509	0	1	NA	0	0.216545	0	1	NA	0.392874	0.216858	-1.81166	0.0700385	NA	-0.392941	0.216894	-1.81167	0.0700369	NA	-0.010931	0.216922	-0.0503916	0.95981	NA	-0.121626	0.217815	-0.558393	0.576576	NA	0.34869	0.218023	1.59932	0.109748	NA	-0.0534507	0.217094	-0.24621	0.805519	NA	0.0670582	0.218397	0.307047	0.758808	1	0.109645
Agr3	#N/A	#N/A	0.384947	-0.158025	0.0998606	-1.58246	0.113544	NA	0	0.0998606	0	1	NA	-0.15587	0.0998606	1.56088	0.118552	NA	0	0.0998606	0	1	NA	0	0.0998606	0	1	NA	0	0.0998606	0	1	NA	0	0.0998606	0	1	NA	0.161937	0.0998606	1.62164	0.104881	NA	0	0.0998606	0	1	1	0
Agrn	ENSRNOG00000020205	agrin [Source:RGD Symbol;Acc:2067]	892.308	-1.01141	0.236961	-4.26827	1.96996e-05	0.00282384	0.649878	0.237426	-2.73718	0.00619677	0.047177	-0.271894	0.236054	1.15183	0.249392	0.547923	-0.0896432	0.23652	-0.379009	0.704682	0.950209	0.359895	0.236585	1.52121	0.128208	0.274494	-0.458581	0.236805	-1.93654	0.0528021	0.131005	0.336261	0.235997	1.42485	0.154201	0.315706	0.753327	0.236018	3.19182	0.00141378	0.00683227	0.200493	0.235861	0.850051	0.395297	1	0.168598
Agrp	ENSRNOG00000039001	agouti related neuropeptide [Source:RGD Symbol;Acc:2068]	30.4663	0.321344	0.455677	0.7052	0.480686	0.775031	0.380408	0.45636	-0.83357	0.404523	0.65875	0.828282	0.455898	-1.81681	0.0692458	0.269891	-0.12653	0.456579	-0.277126	0.781683	0.970933	0.934596	0.456082	2.04918	0.0404441	0.115674	0.282925	0.456366	0.619952	0.53529	0.690133	0.724471	0.456607	1.58664	0.112594	0.253504	0.0722828	0.455634	0.158642	0.873951	0.932196	0.110702	0.456323	0.242595	0.808319	1	0.271263
Agt	ENSRNOG00000018445	angiotensinogen (serpin peptidase inhibitor, clade A, member 8) [Source:RGD Symbol;Acc:2069]	3532.82	-0.099271	0.185443	-0.535319	0.59243	0.840911	-1.34575	0.186513	7.21532	5.38076e-13	1.77491e-10	-1.95108	0.187107	10.4276	1.85454e-25	4.78509e-22	0.506056	0.188167	2.6894	0.00715807	0.182946	-0.471122	0.186819	-2.52181	0.0116753	0.0431223	-0.299866	0.185149	-1.61959	0.105321	0.22172	-0.532985	0.187544	-2.84191	0.0044844	0.0202669	-0.143466	0.185261	-0.774399	0.438695	0.616226	0.0571286	0.184968	0.308857	0.75743	1	1.17449
Agtpbp1	ENSRNOG00000018651	ATP/GTP binding protein 1 [Source:RGD Symbol;Acc:1306307]	3379.17	-0.286626	0.141418	-2.0268	0.0426829	0.262485	0.539924	0.14123	-3.82301	0.000131834	0.00261081	0.340371	0.141128	-2.4118	0.0158741	0.108636	-0.0870726	0.140939	-0.617802	0.536706	0.886094	0.783256	0.141241	5.54553	2.93059e-08	4.53563e-07	0.394366	0.141411	2.78879	0.00529052	0.0200867	0.806634	0.140992	5.72113	1.05818e-08	1.77192e-07	0.655992	0.141442	4.63789	3.51989e-06	3.30043e-05	-0.0250006	0.141435	-0.176764	0.859694	1	-0.151035
Agtr1a	ENSRNOG00000018346	angiotensin II receptor, type 1a [Source:RGD Symbol;Acc:2070]	4.25703	0	0.123368	0	1	NA	0	0.123373	0	1	NA	0	0.123324	0	1	1	0	0.123329	0	1	NA	-0.074066	0.123441	-0.600013	0.548497	NA	-0.0475024	0.123544	-0.384498	0.70061	NA	0	0.123484	0	1	NA	-0.132713	0.123467	-1.07489	0.282423	NA	-0.085289	0.123642	-0.689805	0.490317	1	-0.026637
Agtr1b	#N/A	#N/A	0.667393	0.0862095	0.100135	0.860935	0.389274	NA	-0.0864028	0.100135	0.862866	0.388211	NA	0	0.0999056	0	1	NA	0	0.0999056	0	1	NA	0	0.100245	0	1	NA	0.0877655	0.10062	0.872243	0.383076	NA	0	0.100368	0	1	NA	0	0.100324	0	1	NA	0	0.100809	0	1	1	0
Agtr2	ENSRNOG00000050006	angiotensin II receptor, type 2 [Source:RGD Symbol;Acc:2072]	1.16917	0	0.10122	0	1	NA	0	0.101231	0	1	NA	0	0.10113	0	1	NA	0	0.101141	0	1	NA	0	0.101336	0	1	NA	-0.117067	0.101603	-1.1522	0.249239	NA	0	0.101456	0	1	NA	-0.0879574	0.101404	-0.867393	0.385726	NA	0.0289824	0.101786	0.284737	0.775845	1	0.117143
Agtrap	ENSRNOG00000008619	angiotensin II receptor-associated protein [Source:RGD Symbol;Acc:1359346]	356.727	-0.308477	0.33203	-0.929063	0.352856	0.680452	-0.069127	0.332705	0.207773	0.835407	0.938856	-0.703402	0.333165	2.11127	0.0347489	0.177332	0.325798	0.333837	0.975918	0.329105	0.771772	-0.066333	0.33236	-0.199582	0.841808	0.917824	-0.278432	0.331145	-0.840816	0.400451	0.571054	-0.0915888	0.333093	-0.274965	0.783343	0.88295	0.118776	0.331298	0.358516	0.719957	0.837166	0.0887313	0.330412	0.268548	0.788278	1	0.281226
Ahctf1	ENSRNOG00000023541	AT hook containing transcription factor 1 [Source:RGD Symbol;Acc:1561291]	405.918	0.031005	0.340083	0.0911688	0.927358	0.984668	-0.480244	0.340716	1.40951	0.158684	0.391357	-0.0361532	0.340341	0.106226	0.915403	0.98762	-0.413086	0.340974	-1.21149	0.225708	0.683669	0.244061	0.341301	0.715091	0.474553	0.656867	0.379698	0.339698	1.11775	0.263673	0.43044	0.922327	0.340765	2.70663	0.0067969	0.0287712	0.69637	0.340528	2.04497	0.0408574	0.111609	0.347677	0.340143	1.02215	0.30671	1	0.344607
Ahcy	ENSRNOG00000017777	adenosylhomocysteinase [Source:RGD Symbol;Acc:69260]	694.854	0.0795335	0.29174	0.272618	0.785147	0.932067	-0.104336	0.291752	0.35762	0.720628	0.879337	-0.0390963	0.292135	0.13383	0.893537	0.979463	0.0142937	0.292147	0.0489264	0.960978	0.999581	-0.294716	0.291302	-1.01172	0.311672	0.502725	-0.229465	0.290567	-0.789715	0.429694	0.598156	-0.391265	0.290956	-1.34476	0.178704	0.349819	-0.433164	0.291061	-1.48822	0.136692	0.279089	-0.124165	0.289884	-0.428327	0.668413	1	0.0390851
Ahcyl1	ENSRNOG00000018569	adenosylhomocysteinase-like 1 [Source:RGD Symbol;Acc:1309768]	4594.34	-0.100808	0.11587	-0.870011	0.384295	0.703335	-0.0226458	0.115966	0.195279	0.845174	0.942828	-0.28504	0.116173	2.45359	0.014144	0.10024	0.161586	0.116269	1.38977	0.164599	0.628714	-0.272627	0.11566	-2.35715	0.0184158	0.0623492	-0.245304	0.115315	-2.12725	0.0333997	0.091541	-0.512909	0.115596	-4.4371	9.11799e-06	9.06785e-05	-0.212291	0.115476	-1.8384	0.0660033	0.161799	-0.0677958	0.114919	-0.589942	0.555229	1	-0.00467749
Ahcyl2	ENSRNOG00000039300	adenosylhomocysteinase-like 2 [Source:RGD Symbol;Acc:1564895]	1036.93	0.0983805	0.225592	0.436099	0.662765	0.879184	-0.083175	0.225543	0.368776	0.712295	0.874426	-0.536848	0.226799	2.36707	0.0179297	0.116942	0.552053	0.226751	2.43463	0.0149071	0.253133	0.180022	0.225582	0.798032	0.424852	0.612798	-0.015809	0.224666	-0.0703665	0.943902	0.968491	-0.251813	0.226311	-1.11268	0.265845	0.457675	-0.0646891	0.225284	-0.287145	0.774001	0.871381	0.0495003	0.224357	0.220632	0.825379	1	0.279006
Ahdc1	ENSRNOG00000042855	AT hook, DNA binding motif, containing 1 [Source:RGD Symbol;Acc:1310031]	772.479	0.114248	0.251719	0.453869	0.649923	0.872433	-0.539218	0.252248	2.13765	0.0325453	0.145485	-0.416409	0.252473	1.64932	0.0990827	0.332882	-0.00856164	0.253001	-0.0338404	0.973004	1	0.967202	0.253948	3.80866	0.000139722	0.000992563	1.19484	0.252224	4.73721	2.16682e-06	2.00244e-05	1.07631	0.253739	4.2418	2.21733e-05	0.000200036	1.28534	0.253024	5.07991	3.77622e-07	4.20535e-06	0.204748	0.253525	0.807604	0.419319	1	0.311584
Ahi1	ENSRNOG00000013969	Abelson helper integration site 1 [Source:RGD Symbol;Acc:1303040]	3212.67	0.336969	0.183868	1.83267	0.0668517	0.323318	-1.42702	0.184409	7.73837	1.00703e-14	4.53702e-12	-1.1009	0.184507	5.96672	2.42066e-09	3.79643e-07	0.0108461	0.185046	0.0586131	0.95326	0.998533	1.02722	0.185547	5.53614	3.09204e-08	4.76713e-07	1.59309	0.184104	8.65321	5.00723e-18	2.26945e-16	1.07847	0.185421	5.81632	6.01586e-09	1.04302e-07	1.37084	0.184362	7.4356	1.04096e-13	2.82663e-12	0.11472	0.184597	0.62146	0.534297	1	0.86115
Ahnak	ENSRNOG00000057569	AHNAK nucleoprotein [Source:RGD Symbol;Acc:619779]	231.296	0.0659971	0.41242	0.160024	0.872862	0.967335	-0.453757	0.412936	1.09885	0.271831	0.531405	0.472591	0.412212	-1.14647	0.251599	0.550149	-0.86035	0.412729	-2.08454	0.0371109	0.367768	0.154228	0.413346	0.373121	0.709058	0.837529	0.580067	0.412215	1.40719	0.15937	0.300151	0.490692	0.411569	1.19225	0.233164	0.419795	0.572558	0.412738	1.38722	0.165375	0.319553	0.058488	0.412534	0.141778	0.887256	1	0.0279183
Ahr	ENSRNOG00000004342	aryl hydrocarbon receptor [Source:RGD Symbol;Acc:2074]	118.211	0.211151	0.427144	0.494331	0.621072	0.856919	0.521756	0.425673	-1.22572	0.220304	0.470482	0.745614	0.426574	-1.74791	0.0804792	0.293882	-0.0127074	0.425099	-0.0298929	0.976152	1	-0.274722	0.424336	-0.647415	0.517363	0.692976	-0.471762	0.424881	-1.11034	0.266853	0.433834	0.0303496	0.424305	0.0715278	0.942978	0.972076	-0.610253	0.426108	-1.43216	0.152099	0.30148	0.0726592	0.423832	0.171434	0.863883	1	-0.324716
Ahrr	ENSRNOG00000014721	aryl-hydrocarbon receptor repressor [Source:RGD Symbol;Acc:1559857]	4.41125	0	0.113091	0	1	NA	0	0.113095	0	1	NA	0.0581625	0.11307	-0.514392	0.606978	0.840015	-0.0581656	0.113074	-0.514402	0.606971	NA	0	0.113133	0	1	NA	0	0.113213	0	1	NA	0.0582583	0.113188	0.514706	0.606759	NA	-0.0141579	0.113147	-0.125128	0.900422	NA	-0.0142576	0.113269	-0.125874	0.899832	1	0
Ahsa1	ENSRNOG00000048981	AHA1, activator of heat shock 90kDa protein ATPase homolog 1 (yeast) [Source:RGD Symbol;Acc:1589285]	4117.81	0.0669071	0.114037	0.586715	0.557395	0.821918	0.00617066	0.113945	-0.0541547	0.956812	0.989719	0.133234	0.114124	-1.16745	0.243029	0.540758	-0.0601567	0.114033	-0.527539	0.597819	0.910232	0.0370262	0.113797	0.325371	0.744901	0.859096	-0.0733947	0.113376	-0.64736	0.517399	0.674698	-0.0197523	0.113476	-0.174066	0.861814	0.928478	-0.150119	0.113745	-1.31979	0.186905	0.348376	-0.00981748	0.113082	-0.0868176	0.930816	1	0.10425
Ahsa2	ENSRNOG00000052142	AHA1, activator of heat shock protein ATPase 2 [Source:RGD Symbol;Acc:1307171]	439.584	-0.209671	0.265309	-0.790292	0.429357	0.735509	0.059756	0.265658	-0.224935	0.822029	0.932345	0.254155	0.264688	-0.960203	0.336953	0.641155	-0.40407	0.265039	-1.52457	0.127367	0.586762	0.0734701	0.26519	0.277046	0.781744	0.883434	0.0993818	0.26446	0.375791	0.707072	0.821099	0.338579	0.263487	1.285	0.198794	0.376178	0.221283	0.264624	0.836217	0.403033	0.583579	-0.0877701	0.263773	-0.332749	0.739324	1	-0.0856677
Ahsg	ENSRNOG00000038370	alpha-2-HS-glycoprotein [Source:RGD Symbol;Acc:2075]	0	NA	NA	NA	NA	NA	NA	NA	NA	NA	NA	NA	NA	NA	NA	NA	NA	NA	NA	NA	NA	NA	NA	NA	NA	NA	NA	NA	NA	NA	NA	NA	NA	NA	NA	NA	NA	NA	NA	NA	NA	NA	NA	NA	NA	NA	NA
Ahsp	ENSRNOG00000020165	alpha hemoglobin stabilizing protein [Source:RGD Symbol;Acc:1306725]	52.0344	-0.25685	0.455188	-0.564273	0.572568	0.829806	0.172801	0.455158	-0.379651	0.704204	0.869656	-0.0385292	0.455208	0.084641	0.932547	0.992222	-0.0455199	0.455178	-0.100005	0.920341	0.994956	0.556493	0.455088	1.22282	0.221396	0.401844	0.663023	0.455077	1.45695	0.145131	0.280078	0.733271	0.455154	1.61104	0.107171	0.244668	0.825911	0.455081	1.81487	0.0695444	0.168109	-0.0939618	0.454969	-0.206523	0.836382	1	-0.279331
Aida	ENSRNOG00000058805	axin interactor, dorsalization associated [Source:RGD Symbol;Acc:1592746]	660.337	-0.302662	0.253409	-1.19436	0.232338	0.570934	-0.0365227	0.254	0.14379	0.885666	0.959512	9.64208e-05	0.253206	-0.0003808	0.999696	1	-0.339281	0.253797	-1.33682	0.181281	0.643023	-0.202718	0.253438	-0.799874	0.423784	0.611844	0.130276	0.253022	0.514879	0.606638	0.745133	0.247624	0.252619	0.980225	0.326975	0.523152	0.655634	0.253435	2.58699	0.00968187	0.0347512	0.222696	0.253048	0.880057	0.378828	1	-0.296471
Aif1	ENSRNOG00000000853	allograft inflammatory factor 1 [Source:RGD Symbol;Acc:61924]	3109.36	0.350225	0.172487	2.03045	0.042311	0.26073	0.887336	0.171922	-5.16128	2.45264e-07	1.67244e-05	0.758627	0.172394	-4.40054	1.07984e-05	0.000488808	0.478935	0.171829	2.78728	0.00531524	0.157515	1.13476	0.171929	6.60014	4.10776e-11	9.67936e-10	1.29683	0.172676	7.51023	5.9024e-14	1.65751e-12	1.19324	0.172256	6.92716	4.29368e-12	1.1932e-10	1.37892	0.173474	7.94888	1.88205e-15	5.92971e-14	0.432317	0.173662	2.48942	0.0127952	1	-1.04941
Aif1l	ENSRNOG00000009951	allograft inflammatory factor 1-like [Source:RGD Symbol;Acc:1305081]	222.235	0.0736519	0.390379	0.188668	0.850353	0.958269	-0.795931	0.391512	2.03297	0.0420558	0.172022	-0.949435	0.392148	2.42112	0.0154729	0.106918	0.227156	0.393273	0.577603	0.563532	0.898405	-0.253008	0.391849	-0.645676	0.518489	0.693527	0.463635	0.390035	1.1887	0.234557	0.396275	-0.384556	0.392037	-0.980918	0.326633	0.522747	0.693001	0.390861	1.77301	0.0762269	0.180612	0.303018	0.390518	0.775937	0.437786	1	0.0792877
Aifm1	ENSRNOG00000006067	apoptosis-inducing factor, mitochondrion-associated 1 [Source:RGD Symbol;Acc:620817]	580.724	0.111957	0.263351	0.425122	0.670748	0.882771	0.27847	0.2626	-1.06043	0.288947	0.549039	0.219271	0.263455	-0.832291	0.405245	0.70298	0.171155	0.262704	0.651514	0.514715	0.878792	0.309729	0.262309	1.18078	0.237691	0.42188	0.371064	0.262564	1.41323	0.157587	0.297464	0.191482	0.262302	0.730006	0.465387	0.654598	0.0597467	0.263106	0.227082	0.82036	0.898569	-0.199361	0.262318	-0.76	0.447255	1	-0.339806
Aifm2	ENSRNOG00000059445	apoptosis-inducing factor, mitochondrion-associated 2 [Source:RGD Symbol;Acc:1304964]	230.159	-1.23266	0.431857	-2.85431	0.00431301	0.0770238	-0.331879	0.433217	0.766081	0.443628	0.693156	-1.52604	0.432361	3.52956	0.000416252	0.00860588	-0.0384911	0.433717	-0.0887471	0.929283	0.996337	-0.753819	0.432727	-1.74202	0.0815052	0.196232	-1.12337	0.431613	-2.60273	0.00924857	0.0322444	-0.886786	0.432352	-2.05107	0.0402599	0.118255	0.243805	0.431035	0.565628	0.571647	0.729332	0.134521	0.43079	0.312267	0.754838	1	0.701431
Aifm3	ENSRNOG00000037957	apoptosis-inducing factor, mitochondrion-associated 3 [Source:RGD Symbol;Acc:1306028]	688.867	-0.187739	0.215391	-0.871617	0.383417	0.70301	-0.166119	0.216272	0.768102	0.442427	0.692802	-0.117198	0.215616	0.54355	0.586751	0.829008	-0.236659	0.216496	-1.09313	0.274335	0.730279	-0.136639	0.215877	-0.632948	0.526768	0.700702	-0.198666	0.214087	-0.927968	0.353424	0.526272	0.139374	0.214799	0.648856	0.516432	0.697741	-0.0508623	0.214374	-0.23726	0.812455	0.89452	-0.0399348	0.213063	-0.187432	0.851322	1	0.228147
Aig1	ENSRNOG00000010753	androgen-induced 1 [Source:RGD Symbol;Acc:1562920]	1868.12	0.09039	0.205192	0.440515	0.659565	0.877879	-0.123647	0.205211	0.602538	0.546816	0.769657	0.201371	0.205248	-0.981109	0.326539	0.631303	-0.234628	0.205267	-1.14304	0.253023	0.712433	-0.404199	0.20482	-1.97344	0.048446	0.133304	-0.232057	0.204312	-1.13579	0.256042	0.421822	-0.120376	0.20439	-0.588954	0.555892	0.729298	-0.23699	0.204818	-1.15708	0.247239	0.421842	0.0854563	0.203936	0.419035	0.675191	1	-0.0484949
Aimp1	ENSRNOG00000011384	aminoacyl tRNA synthetase complex-interacting multifunctional protein 1 [Source:RGD Symbol;Acc:620466]	2197.74	0.402553	0.131879	3.05243	0.00226995	0.0535503	-0.473005	0.131941	3.58497	0.000337111	0.0054174	0.04173	0.132327	-0.315356	0.752492	0.917326	-0.112182	0.132388	-0.847375	0.396786	0.818327	0.731888	0.132907	5.50678	3.65456e-08	5.55613e-07	1.33008	0.132175	10.0631	8.04596e-24	7.34745e-22	0.833221	0.132489	6.289	3.19527e-10	6.67147e-09	1.01066	0.132985	7.59979	2.96611e-14	8.58361e-13	0.0831299	0.133278	0.623731	0.532804	1	-0.125191
Aimp2	ENSRNOG00000001044	aminoacyl tRNA synthetase complex-interacting multifunctional protein 2 [Source:RGD Symbol;Acc:1560787]	1163.82	0.0565296	0.227263	0.248741	0.803561	0.940391	-0.0514082	0.227224	0.226245	0.821011	0.931893	0.226576	0.227266	-0.996964	0.318782	0.6235	-0.221455	0.227226	-0.974599	0.329759	0.772976	-0.730835	0.226302	-3.22946	0.00124024	0.0066049	-0.531164	0.225761	-2.35277	0.0186342	0.0575313	-0.290104	0.225844	-1.28453	0.198955	0.376424	-0.616536	0.22635	-2.72381	0.00645335	0.0248771	-0.0288425	0.224841	-0.128279	0.897928	1	-0.148263
Aip	ENSRNOG00000022289	aryl-hydrocarbon receptor-interacting protein [Source:RGD Symbol;Acc:628619]	1666.06	-0.24472	0.184767	-1.32447	0.185346	0.518288	0.158281	0.184861	-0.856212	0.391881	0.647065	-0.165255	0.184888	0.893811	0.371423	0.673145	0.0788159	0.184982	0.426073	0.670055	0.940955	-0.126116	0.184314	-0.684248	0.493819	0.672578	-0.33941	0.183958	-1.84504	0.0650322	0.154058	-0.280862	0.18409	-1.52568	0.12709	0.27523	0.0257565	0.184182	0.139843	0.888784	0.940832	0.120447	0.18337	0.656851	0.511277	1	0.0550132
Aipl1	ENSRNOG00000007889	aryl hydrocarbon receptor-interacting protein-like 1 [Source:RGD Symbol;Acc:70906]	32.9303	-0.267456	0.388019	-0.689285	0.490644	0.78195	0.335577	0.388098	-0.864671	0.387219	0.642142	-0.412457	0.387696	1.06387	0.287388	0.58977	0.480579	0.387775	1.23932	0.215226	0.671091	0.143316	0.388434	0.368959	0.712158	0.838969	-0.117712	0.388448	-0.303032	0.761866	0.858526	-0.271767	0.388108	-0.700235	0.483781	0.67195	0.415949	0.388182	1.07153	0.283931	0.463186	0.266205	0.38861	0.685018	0.493333	1	-0.0745493
Aire	ENSRNOG00000001213	autoimmune regulator [Source:RGD Symbol;Acc:1311139]	1.15932	0	0.101195	0	1	NA	0	0.101206	0	1	NA	0	0.101104	0	1	NA	0	0.101114	0	1	NA	-0.035743	0.101328	-0.352744	0.72428	NA	0	0.101539	0	1	NA	-0.0595305	0.101458	-0.586752	0.55737	NA	-0.0375782	0.101362	-0.370731	0.710838	NA	-0.0378268	0.101706	-0.371923	0.709951	1	-0.0359838
Ajap1	ENSRNOG00000050137	adherens junction associated protein 1 [Source:RGD Symbol;Acc:1590138]	986.07	-0.145881	0.208407	-0.69998	0.48394	0.776815	-0.186816	0.208965	0.894006	0.371319	0.629172	-0.404149	0.209111	1.9327	0.0532732	0.231173	0.0714531	0.209667	0.340794	0.733259	0.956501	-4.81858e-05	0.208906	-0.000230657	0.999816	1	-0.058833	0.207622	-0.283367	0.776896	0.868853	-0.040345	0.208692	-0.193323	0.846706	0.920214	0.0799505	0.20791	0.384544	0.700575	0.823618	-0.00709691	0.207123	-0.0342643	0.972666	1	0.2456
Ajuba	ENSRNOG00000012791	ajuba LIM protein [Source:RGD Symbol;Acc:620407]	47.5066	0.442133	0.453877	0.974124	0.329995	0.661033	-0.913015	0.453456	2.01346	0.0440661	0.177224	-0.440672	0.453165	0.972433	0.330835	0.63504	-0.0302102	0.452741	-0.0667275	0.946799	0.998016	-0.979446	0.453575	-2.15939	0.0308196	0.0933348	0.0111954	0.454472	0.0246339	0.980347	0.988769	-0.602437	0.453646	-1.32799	0.184181	0.356798	-0.279651	0.453951	-0.616037	0.53787	0.701678	0.151287	0.454545	0.332831	0.739262	1	-0.0776264
Ak1	ENSRNOG00000049056	adenylate kinase 1 [Source:MGI Symbol;Acc:MGI:87977]	1970.83	-0.131045	0.183469	-0.714261	0.475066	0.771996	-0.603574	0.184722	3.26747	0.00108513	0.0131119	-0.328347	0.18397	1.78479	0.0742951	0.281404	-0.406271	0.185219	-2.19347	0.0282738	0.3324	-1.22003	0.183962	-6.63198	3.31214e-11	7.92872e-10	-0.709993	0.182318	-3.89425	9.85021e-05	0.000614853	-0.753251	0.182936	-4.11758	3.82877e-05	0.000325196	-0.630015	0.182549	-3.45122	0.000558063	0.00306656	-0.0510673	0.181392	-0.281531	0.778303	1	0.0935337
Ak2	ENSRNOG00000000122	adenylate kinase 2 [Source:RGD Symbol;Acc:2077]	551.735	-0.162674	0.2406	-0.676118	0.498965	0.787114	-0.172653	0.24132	0.715452	0.47433	0.715664	-0.0296599	0.240672	0.123238	0.901919	0.983359	-0.305667	0.241392	-1.26627	0.205417	0.662582	-0.077262	0.241088	-0.320472	0.74861	0.861184	0.470951	0.240488	1.95831	0.0501932	0.12605	0.293329	0.240066	1.22186	0.221759	0.405661	0.666157	0.240921	2.76504	0.00569161	0.022446	0.0325325	0.24081	0.135096	0.892536	1	-0.37556
Ak3	ENSRNOG00000052506	adenylate kinase 3 [Source:RGD Symbol;Acc:619885]	2029.88	0.293062	0.1634	1.79352	0.072889	0.333399	-0.398777	0.163513	2.43881	0.0147356	0.085861	-0.204584	0.164089	1.24679	0.212475	0.505094	0.0988697	0.164201	0.602126	0.547091	0.891258	-0.153542	0.163526	-0.938944	0.347759	0.540015	0.354735	0.162768	2.17939	0.0293027	0.0822693	-0.0743785	0.163545	-0.45479	0.649261	0.796975	0.212912	0.163545	1.30186	0.192966	0.356494	0.15124	0.162913	0.928343	0.353229	1	-0.109499
Ak4	ENSRNOG00000045738	adenylate kinase 4 [Source:RGD Symbol;Acc:2078]	65.8479	-0.04901	0.460939	-0.106326	0.915323	0.981163	-0.171152	0.460921	0.371326	0.710395	0.873709	-0.681571	0.46086	1.47891	0.139164	0.402637	0.461409	0.460841	1.00123	0.316715	0.764306	-0.088602	0.460928	-0.192225	0.847566	0.920499	-0.237632	0.460977	-0.515497	0.606206	0.745133	-0.686876	0.460894	-1.49031	0.136143	0.288978	-0.37522	0.460963	-0.813991	0.41565	0.594861	-0.186598	0.461	-0.404767	0.685649	1	0.320182
Ak6	ENSRNOG00000039848	adenylate kinase 6 [Source:RGD Symbol;Acc:7387335]	546.999	-0.84782	0.277914	-3.05065	0.00228343	0.0537008	0.531511	0.278491	-1.90854	0.0563216	0.207203	0.09116	0.276418	-0.329791	0.741558	0.913716	-0.407469	0.276998	-1.47102	0.141287	0.605067	-0.128006	0.276825	-0.462409	0.643788	0.790605	-0.416293	0.277501	-1.50015	0.133576	0.26394	0.230851	0.275653	0.837468	0.402329	0.59737	0.382713	0.276366	1.3848	0.166112	0.320625	-0.0488151	0.27595	-0.176899	0.859588	1	-0.243225
Ak7	ENSRNOG00000055714	adenylate kinase 7 [Source:RGD Symbol;Acc:1309600]	24.3147	-1.084	0.423346	-2.56057	0.0104502	0.124372	0.546278	0.422562	-1.29278	0.196088	0.442513	-0.656653	0.42384	1.5493	0.121311	0.372981	0.118927	0.423056	0.281113	0.778624	0.969304	0.0340419	0.423791	0.0803272	0.935977	0.967557	-0.406421	0.423361	-0.959987	0.337062	0.509165	0.280078	0.423452	0.661417	0.508345	0.69098	0.928497	0.424229	2.18867	0.0286207	0.0842494	0.250914	0.424244	0.591437	0.554228	1	-0.105815
Ak8	ENSRNOG00000012761	adenylate kinase 8 [Source:RGD Symbol;Acc:1303144]	32.9506	-0.634389	0.428955	-1.47892	0.139162	0.456746	0.794461	0.429179	-1.85112	0.0641527	0.224614	0.425654	0.430061	-0.989752	0.322295	0.627233	-0.265583	0.430285	-0.617225	0.537087	0.886094	0.31373	0.430114	0.729411	0.46575	0.649913	-0.987987	0.429953	-2.2979	0.0215675	0.0643633	0.294383	0.430874	0.683222	0.494466	0.680057	0.167773	0.429983	0.390184	0.6964	0.820845	0.521371	0.430979	1.20974	0.22638	1	0.507256
Akap1	ENSRNOG00000002373	A kinase (PRKA) anchor protein 1 [Source:RGD Symbol;Acc:620826]	189.487	0.551266	0.443153	1.24396	0.213513	0.551588	-0.065916	0.442512	0.148959	0.881586	0.95781	0.68163	0.443189	-1.53801	0.124046	0.378505	-0.19628	0.442548	-0.443522	0.657388	0.936262	-0.812454	0.441883	-1.83862	0.0659713	0.167941	-1.16333	0.441306	-2.63609	0.00838663	0.0296843	-0.697366	0.441477	-1.57962	0.114194	0.255698	-1.78042	0.442302	-4.02534	5.68942e-05	0.000408736	-0.0658241	0.440445	-0.149449	0.881199	1	0.416788
Akap10	ENSRNOG00000002899	A kinase (PRKA) anchor protein 10 [Source:RGD Symbol;Acc:1308869]	194.182	-0.543748	0.412345	-1.31867	0.187278	0.519949	0.984847	0.411857	-2.39124	0.0167918	0.0939787	-0.189915	0.4121	0.460846	0.644909	0.862799	0.631014	0.411611	1.53303	0.125268	0.58382	0.622788	0.411155	1.51473	0.129842	0.277111	0.0936183	0.412281	0.227074	0.820366	0.894982	-0.145385	0.411479	-0.353323	0.723847	0.848616	0.296847	0.411651	0.721112	0.47084	0.644374	-0.34052	0.411587	-0.827333	0.408049	1	-0.455677
Akap11	ENSRNOG00000009987	A kinase (PRKA) anchor protein 11 [Source:RGD Symbol;Acc:2079]	4751.58	-0.00587635	0.18384	-0.0319645	0.9745	0.99752	0.0530065	0.183817	-0.288366	0.773066	0.907691	-0.025923	0.183901	0.140962	0.8879	0.977193	0.0730532	0.183878	0.397292	0.691152	0.945951	0.770502	0.18399	4.18774	2.81745e-05	0.000235426	0.551788	0.183793	3.00222	0.00268017	0.011189	0.67014	0.183916	3.64372	0.000268722	0.00183014	0.350943	0.183842	1.90893	0.0562705	0.143446	-0.206722	0.183795	-1.12474	0.2607	1	0.165707
Akap12	ENSRNOG00000019549	A kinase (PRKA) anchor protein 12 [Source:RGD Symbol;Acc:70988]	610.343	0.605309	0.259095	2.33624	0.0194787	0.172583	-0.544167	0.258937	2.10154	0.0355937	0.154507	-0.0232848	0.260259	0.0894676	0.92871	0.991093	0.0844266	0.260102	0.32459	0.745491	0.958569	0.372609	0.259898	1.43368	0.151665	0.309262	0.851127	0.258305	3.29504	0.00098406	0.00468578	0.577096	0.260147	2.21834	0.0265315	0.0857986	0.508368	0.260214	1.95366	0.050742	0.132447	0.26255	0.259428	1.01204	0.31152	1	0.0656494
Akap13	ENSRNOG00000010964	A kinase (PRKA) anchor protein 13 [Source:RGD Symbol;Acc:727893]	535.18	0.225009	0.297282	0.75689	0.449116	0.750808	0.251882	0.296644	-0.849105	0.395823	0.649838	-0.213704	0.298073	0.716951	0.473404	0.753181	0.690595	0.297437	2.32182	0.0202429	0.29132	1.0816	0.297422	3.6366	0.000276261	0.0017865	0.8623	0.297203	2.90138	0.00371522	0.014746	0.419672	0.298039	1.40811	0.159098	0.322907	0.694583	0.298029	2.33059	0.0197749	0.0621424	0.057293	0.297951	0.19229	0.847515	1	-0.032577
Akap14	ENSRNOG00000006899	A kinase (PRKA) anchor protein 14 [Source:RGD Symbol;Acc:708510]	23.0869	-0.0209054	0.460811	-0.0453665	0.963815	0.994285	-0.102241	0.460775	0.221888	0.824401	0.933389	-0.0316837	0.46077	0.0687625	0.945179	0.995408	-0.0914623	0.460734	-0.198514	0.842643	0.980426	0.226418	0.460754	0.491408	0.623138	0.775846	0.388509	0.46088	0.842972	0.399244	0.56986	0.589166	0.460781	1.27862	0.201029	0.379188	0.399813	0.460803	0.867644	0.38559	0.566303	-0.00960171	0.460872	-0.0208338	0.983378	1	-0.0598499
Akap17a	ENSRNOG00000028211	A kinase (PRKA) anchor protein 17A [Source:RGD Symbol;Acc:1564640]	1582.76	0.0938189	0.15915	0.5895	0.555526	0.821453	-0.264154	0.159302	1.65819	0.0972783	0.291073	-0.13901	0.159481	0.871636	0.383407	0.683745	-0.0313253	0.159633	-0.196233	0.844428	0.980697	1.71535	0.161698	10.6084	2.72355e-26	4.43167e-24	1.84382	0.160619	11.4795	1.67328e-30	2.94688e-28	1.77321	0.161354	10.9895	4.29063e-28	8.69592e-26	2.01622	0.161599	12.4767	1.00105e-35	1.89861e-33	0.266213	0.163046	1.63275	0.102522	1	0.135684
Akap2	ENSRNOG00000011504	A kinase (PRKA) anchor protein 2 [Source:RGD Symbol;Acc:1305135]	2922.86	0.209813	0.212208	0.988714	0.322803	0.653516	-0.414041	0.21228	1.95045	0.0511224	0.194568	-0.395419	0.212464	1.86111	0.0627289	0.253927	0.191191	0.212536	0.899572	0.368348	0.799049	1.97148	0.213516	9.23341	2.62157e-20	1.93659e-18	2.19119	0.212956	10.2894	7.86763e-25	8.1506e-23	1.44747	0.213123	6.79171	1.10808e-11	2.87539e-10	1.98852	0.213151	9.32919	1.0668e-20	5.81924e-19	0.00714881	0.213895	0.033422	0.973338	1	0.194332
Akap3	ENSRNOG00000059227	A kinase (PRKA) anchor protein 3 [Source:RGD Symbol;Acc:1359735]	8.7843	-0.555124	0.352261	-1.57589	0.115051	NA	0	0.350405	0	1	1	-0.133388	0.353044	0.377823	0.705562	0.895429	-0.415758	0.351191	-1.18385	0.236472	NA	-0.246736	0.351818	-0.701318	0.483105	NA	-0.735373	0.354207	-2.07611	0.037884	NA	0.349967	0.353522	0.989945	0.322201	NA	0.41888	0.353649	1.18445	0.236235	NA	0.599128	0.355592	1.68488	0.0920122	1	0.482659
Akap5	ENSRNOG00000006410	A kinase (PRKA) anchor protein 5 [Source:RGD Symbol;Acc:620829]	1602.75	0.33028	0.225893	1.46211	0.143711	0.463798	-0.376686	0.225918	1.66736	0.0954427	0.287559	0.0419569	0.226187	-0.185496	0.85284	0.962176	-0.088363	0.226212	-0.390621	0.696077	0.946948	0.617691	0.226465	2.72753	0.00638095	0.026205	1.00715	0.225882	4.45872	8.24489e-06	6.68434e-05	0.591481	0.2261	2.61602	0.00889615	0.0356665	0.583274	0.226277	2.5777	0.00994612	0.0354586	-0.0935915	0.226266	-0.413635	0.679142	1	-0.0127684
Akap6	ENSRNOG00000004841	A kinase (PRKA) anchor protein 6 [Source:RGD Symbol;Acc:69412]	1701.82	-0.125818	0.20334	-0.618756	0.536077	0.809902	-0.233469	0.203597	1.14672	0.251499	0.508846	-0.589561	0.203806	2.89276	0.00381877	0.0420358	0.230274	0.204063	1.12845	0.25913	0.717229	1.18371	0.204669	5.78351	7.31597e-09	1.25666e-07	1.20991	0.203883	5.93434	2.95024e-09	4.52371e-08	0.858823	0.204507	4.19947	2.67538e-05	0.000236459	1.09756	0.203805	5.38532	7.23148e-08	9.12484e-07	-0.238175	0.204346	-1.16555	0.243798	1	0.207261
Akap7	ENSRNOG00000013202	A kinase (PRKA) anchor protein 7 [Source:RGD Symbol;Acc:1303071]	140.352	-0.36969	0.351921	-1.05049	0.293492	0.629409	0.111448	0.353207	-0.31553	0.752359	0.897393	-0.421377	0.353156	1.19317	0.232802	0.528205	0.163134	0.354437	0.460263	0.645328	0.931787	-0.970571	0.348669	-2.78364	0.00537519	0.0227017	-0.696457	0.348197	-2.00018	0.0454806	0.116542	-0.884502	0.349193	-2.53299	0.0113094	0.0434879	-0.463018	0.347688	-1.33171	0.182956	0.343249	-0.136251	0.343904	-0.39619	0.691965	1	-0.385561
Akap8	ENSRNOG00000006559	A kinase (PRKA) anchor protein 8 [Source:RGD Symbol;Acc:620832]	534.368	-0.36182	0.270462	-1.33779	0.180966	0.514091	0.288256	0.270614	-1.0652	0.286788	0.546169	0.242125	0.269435	-0.898642	0.368843	0.670399	-0.315689	0.269587	-1.17101	0.241595	0.700797	-0.717358	0.268316	-2.67356	0.00750508	0.0300528	-0.557128	0.268684	-2.07354	0.0381217	0.101632	-0.218742	0.267333	-0.818238	0.413221	0.607708	-0.386763	0.268349	-1.44127	0.149509	0.297931	-0.191455	0.266555	-0.718256	0.472599	1	-0.448486
Akap8l	ENSRNOG00000006355	A kinase (PRKA) anchor protein 8-like [Source:RGD Symbol;Acc:1359200]	2058.93	-0.330002	0.220557	-1.49622	0.134596	0.448565	0.348391	0.220535	-1.57975	0.114164	0.31918	-0.0760285	0.220507	0.344789	0.730253	0.907093	0.0944174	0.220485	0.428225	0.668487	0.940357	0.905636	0.220765	4.10227	4.09116e-05	0.000330615	0.558728	0.220689	2.53174	0.0113498	0.0381877	0.776319	0.220637	3.51853	0.000433946	0.00273514	0.78946	0.220636	3.5781	0.000346096	0.00202308	-0.0992699	0.220768	-0.449656	0.652958	1	-0.00148299
Akap9	ENSRNOG00000026319	A kinase (PRKA) anchor protein 9 [Source:RGD Symbol;Acc:620833]	3577.84	0.293988	0.182885	1.6075	0.107944	0.406562	-0.439971	0.182949	2.40489	0.0161774	0.0912285	-0.535641	0.183333	2.92169	0.00348136	0.0392597	0.389658	0.183396	2.12468	0.0336131	0.355966	0.691411	0.183337	3.77126	0.000162424	0.00113049	0.836275	0.182818	4.57435	4.77708e-06	4.08121e-05	0.2143	0.183378	1.16862	0.242555	0.4307	0.501578	0.183052	2.74008	0.00614237	0.0239025	-0.0407086	0.182986	-0.222469	0.823949	1	0.295107
Akip1	ENSRNOG00000013744	A kinase (PRKA) interacting protein 1 [Source:RGD Symbol;Acc:1306959]	427.744	0.151477	0.305182	0.496349	0.619648	0.856328	-0.220126	0.305271	0.721083	0.470859	0.712779	-0.0301739	0.305678	0.0987114	0.921367	0.988617	-0.038475	0.305767	-0.125831	0.899866	0.992441	0.754298	0.306474	2.46121	0.0138468	0.0494452	0.809372	0.305128	2.65256	0.0079883	0.0284639	0.787477	0.30597	2.57371	0.0100615	0.0396093	1.00258	0.306535	3.27069	0.00107284	0.00539435	0.344687	0.306481	1.12466	0.260733	1	0.165052
Akirin1	ENSRNOG00000026610	akirin 1 [Source:RGD Symbol;Acc:1585989]	2144.2	-0.474973	0.205445	-2.31192	0.0207822	0.178869	-0.0903329	0.205996	0.438518	0.661011	0.844893	-0.20336	0.205356	0.990278	0.322038	0.62705	-0.361946	0.205907	-1.75781	0.0787795	0.499328	-0.831984	0.205343	-4.05167	5.0853e-05	0.000403977	-0.54233	0.204956	-2.64608	0.00814305	0.0289468	-0.483968	0.204783	-2.36332	0.0181122	0.0633844	-0.151391	0.204794	-0.739233	0.459766	0.6351	-0.0840336	0.204303	-0.411319	0.680839	1	-0.199322
Akirin2	ENSRNOG00000008288	akirin 2 [Source:RGD Symbol;Acc:1307791]	3490.45	0.167884	0.145546	1.15348	0.248713	0.587115	-0.428913	0.145735	2.9431	0.00324942	0.029812	-0.187248	0.14587	1.28367	0.199257	0.490189	-0.0737801	0.146058	-0.505141	0.61346	0.916399	0.276511	0.146022	1.89363	0.0582744	0.153005	0.591757	0.145372	4.07064	4.68842e-05	0.000319684	0.297159	0.145754	2.03877	0.041473	0.121002	0.385364	0.145664	2.64556	0.00815558	0.03022	-0.0385092	0.145491	-0.264685	0.791252	1	0.113667
Akna	ENSRNOG00000008005	AT-hook transcription factor [Source:RGD Symbol;Acc:1308202]	183.463	-0.0167894	0.408032	-0.0411472	0.967179	0.994654	0.522121	0.407435	-1.28148	0.200023	0.447704	-0.237644	0.408528	0.581709	0.560763	0.811577	0.742976	0.407931	1.82133	0.0685572	0.476752	0.434155	0.407117	1.06641	0.286238	0.475858	0.57748	0.407907	1.41571	0.156859	0.296544	-0.331861	0.40773	-0.813924	0.415689	0.6097	0.491386	0.408191	1.20381	0.228661	0.399793	-0.102883	0.408066	-0.252123	0.800946	1	-0.665446
Aknad1	ENSRNOG00000028025	AKNA domain containing 1 [Source:RGD Symbol;Acc:1583957]	3.3288	0	0.184186	0	1	NA	0	0.18421	0	1	NA	0.104881	0.184113	-0.569657	0.568911	NA	-0.104916	0.184136	-0.569771	0.568833	NA	-0.0173689	0.184456	-0.094163	0.92498	NA	-0.0762441	0.184986	-0.412162	0.680221	NA	0.0165629	0.184896	0.0895797	0.928621	NA	-0.0229021	0.184533	-0.124108	0.901229	NA	0.0527753	0.185332	0.284761	0.775827	1	0.0583428
Akp3	ENSRNOG00000058652	alkaline phosphatase 3, intestine, not Mn requiring [Source:RGD Symbol;Acc:621650]	0	NA	NA	NA	NA	NA	NA	NA	NA	NA	NA	NA	NA	NA	NA	NA	NA	NA	NA	NA	NA	NA	NA	NA	NA	NA	NA	NA	NA	NA	NA	NA	NA	NA	NA	NA	NA	NA	NA	NA	NA	NA	NA	NA	NA	NA	NA
Akr1a1	ENSRNOG00000016727	aldo-keto reductase family 1, member A1 (aldehyde reductase) [Source:RGD Symbol;Acc:68346]	16680.7	0.0594614	0.133244	0.446258	0.655411	0.875544	-0.282199	0.133294	2.11713	0.0342492	0.150699	-0.13219	0.133315	0.99156	0.321412	0.626745	-0.0905477	0.133364	-0.67895	0.49717	0.869654	-0.563339	0.13322	-4.22864	2.35104e-05	0.000200772	-0.300906	0.133078	-2.26113	0.0237513	0.0695998	-0.474617	0.133154	-3.56441	0.000364678	0.00236057	-0.287448	0.133164	-2.1586	0.0308811	0.089577	0.0729194	0.132997	0.548277	0.583501	1	0.0197664
Akr1b1	ENSRNOG00000009513	aldo-keto reductase family 1, member B1 (aldose reductase) [Source:RGD Symbol;Acc:2092]	1720.51	0.0113048	0.170052	0.0664785	0.946997	0.990341	-0.238607	0.170465	1.39974	0.161591	0.395359	0.298757	0.16989	-1.75853	0.0786573	0.290595	-0.526059	0.170304	-3.08895	0.00200866	0.0990604	-1.02319	0.1694	-6.04008	1.54038e-09	2.94875e-08	-0.788813	0.168336	-4.68594	2.78675e-06	2.5095e-05	-0.200329	0.168422	-1.18945	0.234264	0.421066	-0.691359	0.168981	-4.09133	4.28903e-05	0.000315861	0.108759	0.167254	0.650265	0.515521	1	0.00423163
Akr1b10	ENSRNOG00000009734	aldo-keto reductase family 1, member B10 (aldose reductase) [Source:RGD Symbol;Acc:1308277]	42.6813	0.696661	0.460688	1.51222	0.130478	0.442492	0.264548	0.461007	-0.573847	0.566071	0.781778	0.201266	0.460543	-0.437018	0.662098	0.872367	0.759943	0.460879	1.6489	0.0991686	0.540871	-0.847449	0.460947	-1.8385	0.0659894	0.167951	-0.711676	0.460968	-1.54387	0.122619	0.248993	-1.41209	0.46084	-3.06416	0.00218279	0.0110312	-1.74336	0.460645	-3.78461	0.000153951	0.000995231	-0.335024	0.460892	-0.726903	0.467285	1	-0.400321
Akr1b7	#N/A	#N/A	1.21804	0.0282248	0.103292	0.273251	0.78466	NA	-0.0282326	0.103303	0.273299	0.784624	NA	0	0.10319	0	1	NA	0	0.103201	0	1	NA	-0.0472524	0.103413	-0.456931	0.64772	NA	-0.00737652	0.103639	-0.071175	0.943258	NA	-0.056673	0.103532	-0.547395	0.584107	NA	-0.0415732	0.103442	-0.401897	0.68776	NA	-0.00597183	0.103789	-0.0575383	0.954116	1	-0.0116434
Akr1b8	NA	NA	3.9737	0	0.228089	0	1	NA	0	0.228127	0	1	NA	0.3051	0.228321	-1.33628	0.181459	0.465535	-0.305178	0.22836	-1.33639	0.181421	NA	-0.303008	0.228942	-1.32351	0.185665	NA	-0.126075	0.229493	-0.549363	0.582756	NA	0.131525	0.229744	0.572483	0.566994	NA	-0.0426398	0.2287	-0.186444	0.852096	NA	0.0821361	0.230102	0.356956	0.721125	1	-0.178155
Akr1c12	ENSRNOG00000033010	aldo-keto reductase family 1, member C12 [Source:RGD Symbol;Acc:1359406]	4.47613	0.116144	0.249848	0.464858	0.642033	NA	-0.0146519	0.250162	0.0585696	0.953295	NA	0	0.249186	0	1	1	0.1024	0.249501	0.41042	0.681498	NA	-0.0509678	0.25067	-0.203326	0.83888	NA	0.076655	0.251449	0.304853	0.760478	NA	-0.0925765	0.25082	-0.369095	0.712057	NA	-0.126495	0.250497	-0.504977	0.613575	NA	-0.0870064	0.252096	-0.345132	0.729995	1	-0.112971
Akr1c13	ENSRNOG00000050040	aldo-keto reductase family 1, member C13 [Source:RGD Symbol;Acc:1308232]	3.13421	0.0161659	0.232712	0.0694674	0.944618	NA	0.0324795	0.232905	-0.139453	0.889092	NA	0	0.232224	0	1	NA	0.0495212	0.232417	0.21307	0.831272	NA	-0.179224	0.233837	-0.766449	0.443409	NA	-0.2597	0.234874	-1.1057	0.268857	NA	-0.21308	0.234225	-0.909724	0.362968	NA	-0.141902	0.233685	-0.607235	0.543695	NA	0.133964	0.235843	0.568022	0.57002	1	0.0479961
Akr1c14	ENSRNOG00000017672	aldo-keto reductase family 1, member C14 [Source:RGD Symbol;Acc:708361]	101.314	-1.33875	0.438167	-3.05534	0.00224805	0.0534623	-0.314431	0.440677	0.713518	0.475525	0.716551	-0.663103	0.437433	1.5159	0.129546	0.386817	-0.990078	0.439955	-2.25041	0.024423	0.311362	-0.70608	0.439816	-1.6054	0.108406	0.242328	-0.530317	0.438277	-1.21	0.226278	0.386311	0.19304	0.437625	0.441107	0.659135	0.803973	0.744902	0.436965	1.70472	0.0882473	0.201577	-0.0635311	0.437076	-0.145355	0.884431	1	0.138667
Akr1c19	ENSRNOG00000038319	aldo-keto reductase family 1, member C19 [Source:RGD Symbol;Acc:1562954]	64.7877	0.63572	0.450174	1.41216	0.157902	0.483913	-1.41944	0.451506	3.14379	0.00166778	0.0182156	-0.612158	0.451987	1.35437	0.175618	0.457769	-0.171562	0.453293	-0.378478	0.705075	0.950209	-1.40039	0.451344	-3.10271	0.00191758	0.00968525	0.246689	0.448996	0.549424	0.582715	0.727022	-0.784656	0.451038	-1.73966	0.0819179	0.200138	-0.239987	0.450224	-0.533039	0.594006	0.747007	0.149044	0.449046	0.331912	0.739956	1	-0.227637
Akr1c2	ENSRNOG00000029844	aldo-keto reductase family 1, member C2 [Source:RGD Symbol;Acc:1311841]	0.226494	0	0.0998606	0	1	NA	0	0.0998606	0	1	NA	0	0.0998606	0	1	NA	0	0.0998606	0	1	NA	0	0.0998606	0	1	NA	0	0.0998606	0	1	NA	0	0.0998606	0	1	NA	0	0.0998606	0	1	NA	0	0.0998606	0	1	1	0
Akr1c3	ENSRNOG00000017531	aldo-keto reductase family 1, member C3 [Source:RGD Symbol;Acc:708428]	1.25929	-0.0642976	0.101341	-0.634466	0.525777	NA	0	0.101315	0	1	NA	-0.0642358	0.101256	0.634391	0.525826	NA	0	0.10123	0	1	NA	0	0.101415	0	1	NA	-0.0475365	0.101644	-0.467678	0.640015	NA	0	0.101529	0	1	NA	-0.10269	0.101543	-1.01129	0.311877	NA	-0.119451	0.101845	-1.17287	0.240849	1	0.047609
Akr1cl	ENSRNOG00000021735	aldo-keto reductase family 1, member C-like [Source:RGD Symbol;Acc:1307514]	104.087	0.138438	0.45946	0.301305	0.763182	0.92296	-0.637452	0.459609	1.38695	0.165458	0.400625	0.421959	0.459437	-0.918426	0.358396	0.660335	-0.920973	0.459586	-2.00392	0.0450785	0.398535	-0.861904	0.459523	-1.87565	0.0607035	0.157902	-0.182924	0.459245	-0.398315	0.690398	0.808503	0.133629	0.459232	0.290983	0.771064	0.875711	-0.56695	0.459327	-1.23431	0.217089	0.386577	-0.245588	0.45911	-0.53492	0.592705	1	-0.0415276
Akr1d1	ENSRNOG00000013004	aldo-keto reductase family 1, member D1 [Source:RGD Symbol;Acc:620752]	0.434392	0	0.0998606	0	1	NA	0	0.0998606	0	1	NA	0	0.0998606	0	1	NA	0	0.0998606	0	1	NA	0	0.0998606	0	1	NA	0	0.0998868	0	1	NA	0	0.0998606	0	1	NA	0	0.0998843	0	1	NA	0	0.0999106	0	1	1	0
Akr1e2	ENSRNOG00000017165	aldo-keto reductase family 1, member E2 [Source:RGD Symbol;Acc:1309599]	545.794	0.802375	0.325062	2.46838	0.0135727	0.143611	0.481484	0.322932	-1.49098	0.135967	0.354973	0.739435	0.325353	-2.27271	0.0230434	0.136913	0.544423	0.323226	1.68434	0.0921151	0.528224	0.304196	0.322521	0.943182	0.345588	0.538252	0.068814	0.322812	0.213171	0.831194	0.901942	-0.0972553	0.323042	-0.30106	0.763369	0.87095	-0.689009	0.324823	-2.12118	0.0339063	0.0964906	0.0445515	0.322571	0.138114	0.890151	1	-0.246102
Akr7a2	ENSRNOG00000017780	aldo-keto reductase family 7, member A2 [Source:RGD Symbol;Acc:620311]	902.736	-0.45227	0.292229	-1.54765	0.121706	0.42768	-0.110084	0.292871	0.375878	0.707008	0.87159	-0.565727	0.292565	1.93368	0.0531522	0.230959	0.00337357	0.293205	0.0115058	0.99082	1	-0.556018	0.292296	-1.90224	0.0571393	0.150649	-0.441259	0.291701	-1.51271	0.130353	0.259948	-0.412726	0.292151	-1.41271	0.15774	0.320802	0.147926	0.291675	0.507161	0.612042	0.76084	0.136916	0.291146	0.470264	0.638166	1	-0.00467473
Akr7a3	ENSRNOG00000017899	aldo-keto reductase family 7, member A3 (aflatoxin aldehyde reductase) [Source:RGD Symbol;Acc:628635]	81.498	0.128602	0.460701	0.279144	0.780134	0.93007	0.348154	0.460618	-0.755842	0.449744	0.697078	-0.22422	0.460789	0.486601	0.626541	0.851291	0.700976	0.460707	1.52152	0.128129	0.588397	-0.172336	0.460511	-0.374227	0.708235	0.836904	-0.398907	0.460516	-0.866216	0.386371	0.558797	-0.782046	0.460608	-1.69786	0.0895346	0.213788	-0.392645	0.460614	-0.852437	0.393972	0.573557	0.134864	0.460426	0.292911	0.76959	1	-0.121583
Akt1	ENSRNOG00000028629	v-akt murine thymoma viral oncogene homolog 1 [Source:RGD Symbol;Acc:2081]	2621.02	0.774647	0.218665	3.54262	0.00039618	0.0193919	-0.452409	0.218285	2.07256	0.0382128	0.161276	0.351699	0.219099	-1.6052	0.108449	0.35074	-0.0294603	0.218719	-0.134695	0.892853	0.99178	-0.894207	0.217966	-4.1025	4.08701e-05	0.000330502	-0.399037	0.217344	-1.83597	0.0663615	0.156515	-0.8648	0.217777	-3.97103	7.15629e-05	0.000570707	-1.33642	0.218269	-6.1228	9.19472e-10	1.54012e-08	-0.162732	0.216945	-0.750108	0.453189	1	-0.0427612
Akt1s1	ENSRNOG00000020289	AKT1 substrate 1 (proline-rich) [Source:RGD Symbol;Acc:1312049]	1739.29	-0.0300858	0.225522	-0.133406	0.893873	0.974038	-0.161362	0.2257	0.714941	0.474646	0.716055	-0.188338	0.225815	0.834034	0.404262	0.702121	-0.00311066	0.225994	-0.0137644	0.989018	1	-0.492803	0.225331	-2.18702	0.0287412	0.0884003	-0.22298	0.22488	-0.99155	0.321417	0.492005	-0.260231	0.225261	-1.15524	0.247991	0.437707	-0.146668	0.225178	-0.651342	0.514825	0.682301	0.0462266	0.224535	0.205877	0.836887	1	-0.108461
Akt2	ENSRNOG00000018677	v-akt murine thymoma viral oncogene homolog 2 [Source:RGD Symbol;Acc:2082]	413.031	-0.350784	0.394124	-0.890036	0.373447	0.696498	-0.209893	0.394801	0.531642	0.594974	0.802066	-0.0708188	0.394013	0.179737	0.857359	0.9634	-0.489858	0.39469	-1.24112	0.214562	0.670689	-1.27136	0.393891	-3.22768	0.00124798	0.00662857	-0.649965	0.393377	-1.65227	0.0984792	0.211741	-0.776686	0.393091	-1.97584	0.0481727	0.135439	-0.561016	0.393231	-1.42669	0.153671	0.303425	-0.261836	0.392481	-0.66713	0.504689	1	-0.411498
Akt3	ENSRNOG00000021497	v-akt murine thymoma viral oncogene homolog 3 [Source:RGD Symbol;Acc:62390]	139.6	-0.14208	0.374061	-0.379831	0.704071	0.898597	0.781522	0.371948	-2.10116	0.0356269	0.154551	0.466233	0.372727	-1.25087	0.210982	0.5034	0.17321	0.370603	0.467373	0.640233	0.929341	0.646522	0.370802	1.74358	0.0812328	0.196017	-0.415746	0.371227	-1.11992	0.262746	0.429508	0.578093	0.370908	1.55859	0.119094	0.262999	-0.230043	0.372061	-0.618295	0.536381	0.700626	0.0436228	0.369205	0.118153	0.905946	1	0.280746
Aktip	ENSRNOG00000011956	AKT interacting protein [Source:RGD Symbol;Acc:1311170]	3019.03	-0.244277	0.165021	-1.48028	0.138799	0.456625	0.169656	0.165078	-1.02773	0.304076	0.56552	0.189575	0.164796	-1.15036	0.249997	0.548784	-0.264196	0.164854	-1.60261	0.109022	0.559542	-0.481987	0.164459	-2.93074	0.00338153	0.0155962	-0.683084	0.164246	-4.15891	3.19773e-05	0.000226743	-0.216858	0.164051	-1.3219	0.186202	0.359376	-0.351488	0.164375	-2.13833	0.0324903	0.0931705	0.0873186	0.163597	0.533742	0.59352	1	0.0314399
Alad	ENSRNOG00000015206	aminolevulinate dehydratase [Source:RGD Symbol;Acc:2083]	950.823	-0.263548	0.272866	-0.965852	0.334118	0.663881	-0.0717292	0.273279	0.262477	0.792954	0.919699	-0.137792	0.272918	0.504884	0.613641	0.843715	-0.197485	0.273331	-0.722515	0.469978	0.857555	-0.281994	0.272854	-1.0335	0.30137	0.491041	-0.269475	0.272221	-0.989912	0.322217	0.492718	-0.153482	0.272291	-0.563669	0.572979	0.741373	0.071664	0.272368	0.263115	0.792462	0.883449	0.0775913	0.271722	0.285554	0.77522	1	0.0592102
Alas1	ENSRNOG00000056596	5'-aminolevulinate synthase 1 [Source:RGD Symbol;Acc:68392]	1098	0.251152	0.242127	1.03727	0.299608	0.633687	-0.391194	0.24229	1.61457	0.106404	0.306949	0.025867	0.24252	-0.106659	0.915059	0.98762	-0.165909	0.242683	-0.683644	0.4942	0.867799	-0.106155	0.242339	-0.438042	0.661356	0.803328	0.190769	0.241378	0.790334	0.429332	0.597784	-0.0109195	0.241817	-0.0451558	0.963983	0.982541	0.213258	0.242241	0.880352	0.378669	0.559874	0.27364	0.241493	1.13312	0.257164	1	0.0942698
Alas2	ENSRNOG00000000167	5'-aminolevulinate synthase 2 [Source:RGD Symbol;Acc:2084]	12.8077	-0.699613	0.350311	-1.99712	0.0458119	0.270668	0.255462	0.349484	-0.730969	0.464798	0.708315	-0.74961	0.349796	2.14299	0.0321135	0.169336	0.305459	0.348969	0.87532	0.3814	0.808208	-0.192752	0.350661	-0.549682	0.582537	0.743595	-0.451252	0.350952	-1.2858	0.198514	0.352482	-0.303545	0.350124	-0.866963	0.385962	NA	0.387798	0.351447	1.10343	0.269839	0.44694	0.139438	0.352087	0.396032	0.692081	1	0.00303822
Alb	ENSRNOG00000002911	albumin [Source:RGD Symbol;Acc:2085]	154.718	-0.0245767	0.447264	-0.054949	0.956179	0.992898	0.857945	0.446709	-1.92059	0.0547833	0.203802	0.941091	0.446828	-2.10616	0.0351904	0.178948	-0.107723	0.446271	-0.241386	0.809256	0.974649	0.68227	0.446458	1.52819	0.126466	0.271731	-0.139491	0.446732	-0.312249	0.754852	0.853666	0.608526	0.446206	1.36378	0.172637	0.342218	0.36682	0.447267	0.820136	0.412139	0.591828	0.481735	0.446735	1.07834	0.28088	1	-0.0361828
Alcam	ENSRNOG00000001989	activated leukocyte cell adhesion molecule [Source:RGD Symbol;Acc:619972]	2863.02	0.159936	0.161897	0.987887	0.323208	0.653965	-0.77224	0.162424	4.75448	1.98956e-06	9.69048e-05	-0.343278	0.162339	2.11457	0.0344666	0.17631	-0.269027	0.162865	-1.65184	0.098567	0.54083	0.0644664	0.162811	0.395958	0.692136	0.82586	0.446817	0.161644	2.7642	0.00570625	0.0214145	0.366152	0.162378	2.25493	0.0241376	0.0797817	0.293919	0.161959	1.81477	0.0695589	0.168109	0.00703797	0.161707	0.0435231	0.965285	1	0.38989
Aldh16a1	ENSRNOG00000020623	aldehyde dehydrogenase 16 family, member A1 [Source:RGD Symbol;Acc:1566295]	359.16	-0.559597	0.388572	-1.44014	0.149828	0.473374	0.34925	0.388778	-0.898328	0.369011	0.627119	-0.335759	0.388511	0.86422	0.387467	0.687151	0.125412	0.388717	0.322631	0.746975	0.958741	-0.214143	0.388054	-0.551837	0.58106	0.742496	-0.774258	0.387894	-1.99606	0.0459275	0.117445	-0.519183	0.387869	-1.33855	0.180717	0.352001	0.0478692	0.387809	0.123435	0.901763	0.948318	0.262531	0.387129	0.678148	0.497678	1	0.210866
Aldh18a1	#N/A	#N/A	4.03233	0.33423	0.385651	0.866663	0.386126	NA	0.0353536	0.388707	-0.0909519	0.927531	NA	0.0247574	0.382264	-0.064765	0.948361	0.996653	0.344826	0.385336	0.89487	0.370857	NA	0.229202	0.388899	0.589363	0.555618	NA	0.420548	0.390137	1.07795	0.281057	NA	0.101718	0.386618	0.263096	0.792477	NA	-0.0265909	0.385816	-0.0689213	0.945052	NA	-0.112909	0.390301	-0.289288	0.772361	1	-0.226699
Aldh1a1	ENSRNOG00000017619	aldehyde dehydrogenase 1 family, member A1 [Source:RGD Symbol;Acc:2087]	287.696	-0.350628	0.396891	-0.883435	0.377001	0.698845	0.403788	0.396816	-1.01757	0.308882	0.570451	-0.25525	0.396979	0.64298	0.520237	0.786175	0.30841	0.396903	0.777041	0.437135	0.841416	0.375625	0.39655	0.947231	0.343521	0.536073	-0.344476	0.396289	-0.869252	0.384709	0.557046	0.545187	0.397146	1.37276	0.169826	0.337926	0.14285	0.396379	0.360388	0.718557	0.836485	0.136698	0.395776	0.345393	0.729799	1	0.316312
Aldh1a2	ENSRNOG00000055049	aldehyde dehydrogenase 1 family, member A2 [Source:RGD Symbol;Acc:620250]	615.279	-0.398593	0.339854	-1.17284	0.240862	0.58249	0.0148325	0.340359	-0.0435792	0.96524	0.992498	-0.329071	0.33999	0.967886	0.333101	0.637594	-0.0546888	0.340494	-0.160616	0.872396	0.987793	-0.211067	0.339857	-0.621046	0.53457	0.706792	-0.869596	0.338877	-2.56611	0.0102846	0.0352093	-0.371489	0.339313	-1.09482	0.273594	0.466101	-0.584978	0.338734	-1.72696	0.0841756	0.194402	-0.113974	0.337753	-0.337449	0.735779	1	0.643697
Aldh1a3	ENSRNOG00000052070	aldehyde dehydrogenase 1 family, member A3 [Source:RGD Symbol;Acc:628662]	3.91127	0	0.198524	0	1	NA	0	0.198551	0	1	NA	0	0.198298	0	1	NA	0	0.198325	0	1	NA	0	0.198815	0	1	NA	-0.325573	0.199658	-1.63065	0.102963	NA	-0.104008	0.199214	-0.522089	0.601609	NA	-0.00854591	0.19891	-0.0429637	0.96573	NA	0.316302	0.200042	1.58117	0.113839	1	0.32601
Aldh1a7	ENSRNOG00000017878	aldehyde dehydrogenase family 1, subfamily A7 [Source:MGI Symbol;Acc:MGI:1347050]	1.20192	0	0.101232	0	1	NA	0	0.101243	0	1	NA	0	0.101143	0	1	NA	0	0.101154	0	1	NA	-0.0417953	0.101365	-0.412324	0.680102	NA	0	0.101569	0	1	NA	0	0.101466	0	1	NA	0	0.101381	0	1	NA	0	0.101717	0	1	1	-0.0420309
Aldh1b1	ENSRNOG00000011497	aldehyde dehydrogenase 1 family, member B1 [Source:RGD Symbol;Acc:1306737]	366.206	0.680365	0.329258	2.06635	0.038795	0.251185	-0.884448	0.329725	2.68238	0.00730994	0.0525441	-0.243531	0.331193	0.735315	0.462148	0.746769	0.0394479	0.331656	0.118942	0.905321	0.993221	-0.380662	0.330085	-1.15323	0.248818	0.435995	-0.101585	0.327058	-0.310601	0.756104	0.854299	-0.184399	0.330045	-0.558709	0.57636	0.743649	-0.656568	0.328921	-1.99613	0.0459199	0.122321	0.125382	0.326718	0.383762	0.701155	1	0.605371
Aldh1l1	ENSRNOG00000047023	aldehyde dehydrogenase 1 family, member L1 [Source:RGD Symbol;Acc:621294]	214.3	-0.0439996	0.406203	-0.108319	0.913742	0.980828	-0.0456072	0.406308	0.112248	0.910627	0.969697	-0.38258	0.406917	0.940192	0.347119	0.649954	0.292973	0.407021	0.719799	0.471649	0.858102	0.0762393	0.406186	0.187696	0.851115	0.92274	0.00177263	0.405462	0.00437189	0.996512	0.998271	-0.104213	0.406446	-0.256402	0.797641	0.891771	-0.142946	0.405682	-0.352359	0.724569	0.840626	-0.188718	0.404938	-0.466041	0.641186	1	0.120074
Aldh1l2	ENSRNOG00000008586	aldehyde dehydrogenase 1 family, member L2 [Source:RGD Symbol;Acc:1309458]	14.1419	0.125187	0.344577	0.363307	0.716375	0.902068	0.280243	0.345436	-0.811274	0.417208	0.669348	0.093685	0.344198	-0.272184	0.785481	0.930788	0.311745	0.345057	0.903459	0.366282	0.797142	0.326032	0.345735	0.943013	0.345674	0.538275	-0.252474	0.346358	-0.728938	0.46604	0.630524	-0.232052	0.345879	-0.670906	0.502281	NA	-0.445015	0.345502	-1.28803	0.197737	0.362483	-0.0673548	0.347281	-0.193949	0.846216	1	0.298263
Aldh2	ENSRNOG00000001344	aldehyde dehydrogenase 2 family (mitochondrial) [Source:RGD Symbol;Acc:69219]	1751.23	-0.0230168	0.158349	-0.145355	0.884431	0.970689	-0.0827915	0.158488	0.522383	0.601403	0.806238	-0.00957892	0.158558	0.0604128	0.951827	0.997352	-0.0962295	0.158696	-0.606375	0.544266	0.889882	-0.237699	0.158068	-1.50378	0.132639	0.281082	-0.174391	0.157372	-1.10814	0.2678	0.434686	-0.0144305	0.157747	-0.0914788	0.927112	0.963996	-0.0504061	0.157904	-0.319221	0.749559	0.857104	0.100968	0.156923	0.64342	0.519952	1	0.0194828
Aldh3a1	ENSRNOG00000002331	aldehyde dehydrogenase 3 family, member A1 [Source:RGD Symbol;Acc:2088]	20.5689	-0.0763682	0.376702	-0.202729	0.839347	0.95403	-0.136228	0.376414	0.361908	0.71742	0.877461	-0.0158792	0.376567	0.0421683	0.966365	1	-0.196717	0.376279	-0.522794	0.601117	0.910678	-0.0576199	0.376582	-0.153008	0.878392	0.938395	0.186723	0.377213	0.495006	0.620596	0.756672	0.171247	0.377121	0.454091	0.649763	0.797283	0.399031	0.376719	1.05923	0.289497	0.469305	0.13594	0.377231	0.360363	0.718575	1	-0.108115
Aldh3a2	ENSRNOG00000002342	aldehyde dehydrogenase 3 family, member A2 [Source:RGD Symbol;Acc:61866]	958.337	0.418572	0.288943	1.44863	0.147441	0.469914	-0.0556383	0.288555	0.192817	0.847102	0.94308	0.323047	0.289148	-1.11724	0.263893	0.564122	0.039887	0.28876	0.138132	0.890136	0.990412	0.369556	0.288702	1.28006	0.200524	0.375624	0.187154	0.288152	0.649499	0.516016	0.673739	0.325253	0.288538	1.12725	0.259639	0.450754	-0.298471	0.288802	-1.03348	0.301379	0.480772	-0.0670534	0.28801	-0.232816	0.815904	1	0.23804
Aldh3b1	ENSRNOG00000017512	aldehyde dehydrogenase 3 family, member B1 [Source:RGD Symbol;Acc:1359546]	1030.12	-0.428198	0.204826	-2.09054	0.0365689	0.242855	0.347065	0.204943	-1.69347	0.0903657	0.278408	0.222202	0.204036	-1.08903	0.276139	0.577293	-0.303335	0.204153	-1.48582	0.137326	0.600978	-0.287739	0.203679	-1.41271	0.157741	0.317832	-0.224981	0.204082	-1.10241	0.270285	0.437567	0.177584	0.20303	0.87467	0.381754	0.577618	0.253869	0.20399	1.24452	0.213309	0.381389	0.0506515	0.203242	0.249217	0.803193	1	-0.409823
Aldh4a1	NA	NA	365.159	1.13916	0.32932	3.45913	0.000541915	0.0231827	-0.473789	0.327463	1.44685	0.147939	0.374766	0.384866	0.330947	-1.16293	0.24486	0.5431	0.280507	0.3291	0.852346	0.394022	0.818035	-0.175015	0.327554	-0.534311	0.593126	0.752326	0.193173	0.325944	0.592656	0.553411	0.704976	-0.516313	0.327683	-1.57565	0.115107	0.256995	-1.09008	0.328988	-3.31344	0.000921567	0.00473584	-0.144092	0.325608	-0.442533	0.658103	1	0.1056
Aldh5a1	ENSRNOG00000023538	aldehyde dehydrogenase 5 family, member A1 [Source:RGD Symbol;Acc:621422]	987.006	-0.184437	0.172424	-1.06968	0.284765	0.621395	0.0199233	0.172697	-0.115365	0.908156	0.968663	-0.0113666	0.172422	0.0659228	0.947439	0.996487	-0.153148	0.172696	-0.886804	0.375184	0.804332	0.518143	0.173174	2.99203	0.00277128	0.0131737	0.488446	0.172394	2.83332	0.00460678	0.0177865	0.779724	0.172673	4.51561	6.31339e-06	6.53867e-05	0.603501	0.17256	3.49734	0.000469916	0.00264526	-0.0693826	0.17253	-0.402148	0.687575	1	0.00977333
Aldh6a1	ENSRNOG00000011419	aldehyde dehydrogenase 6 family, member A1 [Source:RGD Symbol;Acc:621556]	1054.29	-0.23472	0.290782	-0.807203	0.41955	0.728765	-0.340821	0.291276	1.1701	0.241962	0.497563	-0.678056	0.291307	2.32764	0.0199314	0.124701	0.102514	0.291799	0.351319	0.725349	0.954466	-0.191428	0.291223	-0.657327	0.510971	0.686902	-0.0554039	0.29047	-0.190739	0.84873	0.911741	-0.291573	0.291128	-1.00153	0.316571	0.51307	0.150127	0.290531	0.516734	0.605342	0.756632	-0.0291894	0.290218	-0.100578	0.919886	1	0.204797
Aldh7a1	ENSRNOG00000014645	aldehyde dehydrogenase 7 family, member A1 [Source:RGD Symbol;Acc:1308614]	871.671	0.150766	0.216203	0.697333	0.485594	0.777991	-0.387149	0.216723	1.78637	0.0740388	0.245049	-0.294248	0.217428	1.35332	0.175955	0.457971	0.0578648	0.217944	0.265503	0.790622	0.971412	-0.581673	0.216137	-2.69123	0.00711893	0.0286686	-0.283143	0.214468	-1.32021	0.186765	0.337205	-0.517397	0.215975	-2.39564	0.0165913	0.0594064	-0.637373	0.215195	-2.96184	0.00305809	0.0132981	-0.203465	0.213451	-0.953217	0.34048	1	0.0886181
Aldh8a1	ENSRNOG00000014907	aldehyde dehydrogenase 8 family, member A1 [Source:RGD Symbol;Acc:1590218]	0.604247	0	0.100015	0	1	NA	0	0.100015	0	1	NA	0	0.0998765	0	1	NA	0	0.0998765	0	1	NA	0	0.100199	0	1	NA	-0.128703	0.100546	-1.28004	0.200532	NA	0	0.100296	0	1	NA	-0.0209646	0.100297	-0.209025	0.834429	NA	0.105791	0.100827	1.04923	0.294073	1	0.128931
Aldh9a1	ENSRNOG00000004027	aldehyde dehydrogenase 9 family, member A1 [Source:RGD Symbol;Acc:68409]	466.17	-1.00972	0.315943	-3.1959	0.00139396	0.0406678	-0.0496297	0.318316	0.155913	0.876101	0.955148	-1.55186	0.318233	4.8765	1.07984e-06	7.73948e-05	0.492514	0.320586	1.53629	0.124467	0.58382	-1.17962	0.316092	-3.73188	0.000190059	0.00130176	-1.14024	0.314949	-3.62039	0.000294158	0.00160958	-1.60609	0.317351	-5.06092	4.17228e-07	5.40277e-06	-0.267142	0.313462	-0.852233	0.394085	0.573654	-0.136624	0.312459	-0.437254	0.661927	1	0.0102542
Aldoa	ENSRNOG00000052802	aldolase A, fructose-bisphosphate [Source:RGD Symbol;Acc:2089]	46868.5	-0.16475	0.121932	-1.35116	0.176645	0.508905	-0.112833	0.121958	0.925185	0.35487	0.616624	0.0136184	0.121932	-0.111689	0.91107	0.986214	-0.291201	0.121957	-2.38774	0.0169525	0.269811	-0.662772	0.121909	-5.43661	5.43051e-08	8.03302e-07	-0.533638	0.121865	-4.37893	1.19264e-05	9.32919e-05	-0.37236	0.121865	-3.05551	0.00224676	0.0113011	-0.358404	0.12188	-2.94063	0.00327546	0.0141188	0.0104848	0.121813	0.086073	0.931408	1	-0.0163005
Aldoart2	ENSRNOG00000030869	aldolase 1 A retrogene 2 [Source:RGD Symbol;Acc:1359133]	4.32015	-0.0354545	0.400298	-0.0885703	0.929423	NA	-0.0851716	0.399365	0.213267	0.831118	NA	0.0739622	0.3998	-0.184998	0.853231	0.962347	-0.194588	0.398867	-0.487853	0.625654	NA	-0.317506	0.402304	-0.789219	0.429984	NA	-0.223159	0.406226	-0.549346	0.582768	NA	0.0899009	0.404431	0.22229	0.824088	NA	0.0182918	0.402626	0.0454313	0.963764	NA	0.205996	0.408532	0.504235	0.614097	1	-0.00917583
Aldob	ENSRNOG00000006807	aldolase B, fructose-bisphosphate [Source:RGD Symbol;Acc:2090]	8.09184	0.128876	0.290402	0.443784	0.657199	NA	-0.129009	0.290443	0.444181	0.656912	0.842769	0.0483402	0.289905	-0.166745	0.867571	0.967525	-0.0484738	0.289946	-0.167182	0.867227	NA	0	0.290612	0	1	NA	-0.0875177	0.292056	-0.29966	0.764436	NA	-0.272226	0.291653	-0.93339	0.350619	NA	-0.376089	0.29128	-1.29116	0.196649	NA	-0.159695	0.292932	-0.545161	0.585643	1	0.219965
Aldoc	ENSRNOG00000011452	aldolase C, fructose-bisphosphate [Source:RGD Symbol;Acc:2091]	18931.2	-0.19441	0.0992225	-1.95933	0.050074	0.282938	-0.219673	0.0993186	2.2118	0.0269802	0.130205	-0.437583	0.0993154	4.40599	1.05301e-05	0.000481735	0.0234994	0.0994114	0.236385	0.813134	0.975549	-0.14434	0.0992904	-1.45372	0.146024	0.301333	-0.169839	0.0991102	-1.71364	0.0865954	0.192131	-0.163635	0.0992447	-1.6488	0.0991882	0.2307	0.0374589	0.0991415	0.377833	0.705555	0.826656	0.0128879	0.099029	0.130143	0.896454	1	0.245172
Alg1	ENSRNOG00000002883	ALG1, chitobiosyldiphosphodolichol beta-mannosyltransferase [Source:RGD Symbol;Acc:1310700]	212.815	-0.0589602	0.447587	-0.131729	0.895199	0.974405	-0.226723	0.447526	0.506614	0.612426	0.814008	-0.138686	0.44754	0.309885	0.756648	0.918484	-0.146997	0.447479	-0.328501	0.742533	0.958569	-0.584657	0.447609	-1.30618	0.191492	0.364275	-0.35305	0.447733	-0.788528	0.430388	0.598581	-0.469522	0.447687	-1.04877	0.294282	0.488806	-0.506246	0.447702	-1.13077	0.258154	0.43421	-0.212156	0.447849	-0.473722	0.635698	1	-0.00488401
Alg10	ENSRNOG00000014511	ALG10, alpha-1,2-glucosyltransferase [Source:RGD Symbol;Acc:708500]	26.2031	0.602987	0.426629	1.41338	0.157545	0.483381	-0.885053	0.426015	2.07751	0.0377541	0.16008	0.402554	0.426151	-0.944628	0.344849	0.648243	-0.684621	0.425537	-1.60884	0.107652	0.557542	-0.886388	0.426255	-2.07948	0.0375735	0.109492	0.0884606	0.428362	0.206509	0.836393	0.904875	-3.9897e-05	0.427744	-9.32731e-05	0.999926	1	-0.635833	0.426997	-1.48908	0.136465	0.278805	-0.121307	0.428728	-0.282946	0.777218	1	-0.0897959
Alg11	ENSRNOG00000012841	ALG11, alpha-1,2-mannosyltransferase [Source:RGD Symbol;Acc:1564725]	409.492	0.0932795	0.310001	0.300901	0.76349	0.92301	0.466917	0.308541	-1.51331	0.130202	0.34506	0.47046	0.309559	-1.51978	0.128567	0.385463	0.0897365	0.308097	0.29126	0.770852	0.966889	-0.178801	0.307007	-0.582399	0.560298	0.72692	-0.659486	0.307181	-2.14689	0.0318018	0.0880029	-0.327603	0.306722	-1.06808	0.285486	0.479249	-0.805068	0.308265	-2.61161	0.00901158	0.0327617	-0.0523032	0.305427	-0.171246	0.86403	1	0.0137675
Alg12	ENSRNOG00000004591	asparagine-linked glycosylation 12, alpha-1,6-mannosyltransferase [Source:RGD Symbol;Acc:1304826]	238.351	-0.0593082	0.354575	-0.167265	0.867161	0.965173	-0.187348	0.355395	0.527155	0.598086	0.804208	0.61895	0.353368	-1.75157	0.0798472	0.293061	-0.865607	0.354191	-2.44389	0.0145297	0.249821	-1.10504	0.353145	-3.12913	0.00175325	0.00896047	-0.734819	0.35157	-2.09011	0.0366083	0.0984312	-0.034649	0.350427	-0.0988765	0.921236	0.960691	-0.670699	0.352425	-1.90309	0.0570283	0.144958	0.0048123	0.349396	0.0137732	0.989011	1	-0.182869
Alg13	ENSRNOG00000005753	ALG13, UDP-N-acetylglucosaminyltransferase subunit [Source:RGD Symbol;Acc:1359416]	451.103	-0.640156	0.331585	-1.93059	0.0535335	0.292467	0.00574123	0.33239	-0.0172726	0.986219	1	-0.374726	0.331467	1.13051	0.258262	0.558351	-0.259689	0.332271	-0.781558	0.434475	0.839794	0.150017	0.332282	0.451475	0.651647	0.796516	0.174636	0.331722	0.526454	0.598573	0.739008	0.364783	0.331557	1.10021	0.27124	0.463434	0.888377	0.331472	2.6801	0.00736008	0.0276969	0.0735846	0.331609	0.221902	0.82439	1	-0.0303605
Alg14	ENSRNOG00000011528	ALG14, UDP-N-acetylglucosaminyltransferase subunit [Source:RGD Symbol;Acc:1312003]	514.608	-0.991686	0.453936	-2.18464	0.0289152	0.215584	0.708705	0.45397	-1.56113	0.118494	0.325949	-0.251463	0.453848	0.554068	0.579532	0.824499	-0.0315192	0.453882	-0.0694435	0.944637	0.998016	-0.38138	0.453808	-0.840401	0.400684	0.589376	-0.999321	0.45387	-2.20178	0.027681	0.078575	-0.395048	0.453775	-0.87058	0.383983	0.579947	0.100427	0.453781	0.221313	0.824849	0.901997	0.108062	0.453715	0.238172	0.811748	1	-0.0907635
Alg2	ENSRNOG00000006369	ALG2, alpha-1,3/1,6-mannosyltransferase [Source:RGD Symbol;Acc:1309940]	3524.5	0.0151883	0.125459	0.121062	0.903642	0.97751	-0.0297849	0.125455	0.237415	0.812335	0.928309	0.0633959	0.125596	-0.504761	0.613727	0.843743	-0.0779925	0.125592	-0.620999	0.534601	0.886094	-0.526249	0.124848	-4.21512	2.49644e-05	0.000211837	-0.692991	0.124255	-5.57719	2.44434e-08	3.23004e-07	-0.50569	0.124487	-4.06218	4.86164e-05	0.000403591	-0.871293	0.124593	-6.99309	2.68889e-12	6.31403e-11	-0.163114	0.123381	-1.32204	0.186156	1	0.196527
Alg3	ENSRNOG00000001712	ALG3, alpha-1,3- mannosyltransferase [Source:RGD Symbol;Acc:1306004]	643.614	-0.275047	0.307339	-0.894932	0.370823	0.694021	-0.255338	0.308188	0.828515	0.407379	0.660258	-0.609392	0.30815	1.97758	0.0479758	0.216866	0.0790068	0.308996	0.255689	0.798191	0.97243	-0.722083	0.307444	-2.34866	0.0188409	0.0636007	-0.470651	0.306417	-1.53598	0.124543	0.251575	-0.776286	0.307279	-2.52632	0.0115264	0.0441487	-0.21489	0.306488	-0.701136	0.483218	0.654987	-0.0192863	0.305562	-0.0631174	0.949673	1	0.00390606
Alg5	ENSRNOG00000058694	ALG5, dolichyl-phosphate beta-glucosyltransferase [Source:RGD Symbol;Acc:1308900]	579.047	-0.0972865	0.29784	-0.32664	0.74394	0.914885	0.123108	0.297772	-0.41343	0.679291	0.855642	-0.278048	0.298385	0.931844	0.351417	0.654098	0.30387	0.298317	1.01861	0.308387	0.758084	-0.182731	0.297157	-0.614931	0.5386	0.709861	-0.0254066	0.297035	-0.0855342	0.931837	0.962198	-0.427982	0.297398	-1.43909	0.150125	0.309654	-0.0898589	0.297235	-0.302316	0.762411	0.865072	-0.161739	0.296428	-0.545626	0.585323	1	-0.280432
Alg6	ENSRNOG00000009045	ALG6, alpha-1,3-glucosyltransferase [Source:RGD Symbol;Acc:1308815]	130.168	-0.22776	0.443315	-0.513766	0.607416	0.849958	0.892896	0.442744	-2.01673	0.0437234	0.17639	-0.362657	0.443644	0.81745	0.413671	0.709682	1.02779	0.443073	2.31969	0.0203577	0.291669	0.410172	0.442184	0.927604	0.353613	0.545119	-0.450012	0.442601	-1.01674	0.309276	0.479652	-0.939898	0.442764	-2.1228	0.033771	0.103541	-0.144069	0.44276	-0.325388	0.744887	0.85423	0.0781825	0.442043	0.176867	0.859613	1	-0.0327126
Alg8	ENSRNOG00000012292	ALG8, alpha-1,3-glucosyltransferase [Source:RGD Symbol;Acc:1305468]	193.76	-0.156122	0.402395	-0.387982	0.698029	0.895861	-0.839769	0.404268	2.07726	0.0377777	0.160083	0.0195752	0.40239	-0.0486472	0.9612	0.99938	-1.01547	0.404263	-2.51189	0.0120085	0.225007	-0.609917	0.404269	-1.50869	0.131378	0.279048	0.327401	0.40213	0.814166	0.41555	0.584939	0.326578	0.401962	0.81246	0.416528	0.610439	0.102455	0.40197	0.254883	0.798814	0.887107	-0.381068	0.401705	-0.948626	0.342811	1	-0.0975484
Alg9	ENSRNOG00000010877	alpha-1,2-mannosyltransferase [Source:RGD Symbol;Acc:1311272]	375.244	0.0141339	0.335622	0.0421124	0.966409	0.994479	-0.686817	0.33724	2.03658	0.0416922	0.171284	-0.0616402	0.336047	0.183427	0.854463	0.962457	-0.611043	0.337663	-1.80962	0.070354	0.479512	-0.859931	0.336688	-2.55409	0.0106466	0.0400486	-0.0428114	0.334462	-0.128001	0.898148	0.942009	-0.185139	0.33485	-0.552901	0.580331	0.746219	-0.340569	0.334778	-1.0173	0.309012	0.489088	-0.283623	0.333614	-0.850155	0.395239	1	-0.130303
Alk	ENSRNOG00000008683	anaplastic lymphoma receptor tyrosine kinase [Source:RGD Symbol;Acc:628622]	126.933	-0.366473	0.430289	-0.851691	0.394385	0.709238	-0.261404	0.430986	0.606525	0.544166	0.767958	-0.580964	0.430711	1.34885	0.177386	0.459328	-0.0469129	0.431407	-0.108744	0.913406	0.994357	0.51336	0.431614	1.1894	0.234283	0.417927	0.3976	0.43036	0.923878	0.35555	0.52829	0.546449	0.431225	1.2672	0.205083	0.384796	0.766343	0.43035	1.78074	0.0749545	0.17842	0.00226991	0.430421	0.0052737	0.995792	1	0.377164
Alkbh1	ENSRNOG00000012264	alkB homolog 1, histone H2A dioxygenase [Source:RGD Symbol;Acc:1308327]	386.547	-0.0857772	0.300684	-0.285274	0.775434	0.928485	-0.00386406	0.300863	0.0128432	0.989753	1	0.277186	0.300312	-0.922994	0.35601	0.65829	-0.366828	0.300492	-1.22076	0.222178	0.678812	-0.24897	0.300022	-0.829842	0.406628	0.594473	-0.273691	0.299072	-0.915136	0.36012	0.533216	0.106938	0.298768	0.35793	0.720396	0.846148	-0.206165	0.299619	-0.688091	0.491396	0.662069	-0.0182512	0.298001	-0.0612456	0.951164	1	0.0285849
Alkbh2	ENSRNOG00000028584	alkB homolog 2, alpha-ketoglutarate-dependent dioxygenase [Source:RGD Symbol;Acc:1306377]	371.08	-0.243011	0.303526	-0.800628	0.423347	0.730513	0.152886	0.303687	-0.503434	0.614659	0.815259	0.582687	0.302433	-1.92666	0.0540217	0.232621	-0.672812	0.302596	-2.22347	0.0261843	0.320872	0.128358	0.303207	0.423334	0.672052	0.811403	0.166492	0.30297	0.549533	0.58264	0.727002	0.753718	0.30153	2.49965	0.0124317	0.046898	0.478202	0.303322	1.57655	0.114899	0.245023	0.0686994	0.302766	0.226906	0.820497	1	-0.191021
Alkbh3	ENSRNOG00000021678	alkB homolog 3, alpha-ketoglutarate-dependent dioxygenase [Source:RGD Symbol;Acc:1359731]	808.25	-0.411375	0.244187	-1.68468	0.0920512	0.374709	0.710112	0.243577	-2.91535	0.00355286	0.0318772	0.399211	0.243004	-1.64282	0.100421	0.335349	-0.100474	0.242391	-0.414513	0.678498	0.944683	-0.221948	0.241737	-0.918136	0.358548	0.549784	-0.863761	0.242483	-3.56215	0.000367824	0.00196215	-0.0617671	0.241316	-0.255959	0.797982	0.891904	-0.33248	0.242438	-1.3714	0.170249	0.325614	0.119906	0.24072	0.498114	0.618404	1	-0.0682985
Alkbh4	ENSRNOG00000001428	alkB homolog 4, lysine demthylase [Source:RGD Symbol;Acc:1308608]	245.765	-0.537041	0.370191	-1.45071	0.14686	0.469047	0.32682	0.370584	-0.881904	0.377829	0.63483	0.015383	0.369447	-0.0416378	0.966787	1	-0.225603	0.369841	-0.610001	0.541861	0.887993	-0.387463	0.369033	-1.04994	0.293746	0.483658	-0.283626	0.369465	-0.767666	0.442686	0.609088	-0.0511167	0.368345	-0.138774	0.889629	0.942804	-0.00448207	0.368716	-0.0121559	0.990301	0.995063	-0.257897	0.367986	-0.700833	0.483407	1	-0.430657
Alkbh5	ENSRNOG00000028341	alkB homolog 5, RNA demethylase [Source:RGD Symbol;Acc:1309496]	532.728	0.109748	0.244807	0.448303	0.653934	0.874698	0.00215588	0.244336	-0.00882345	0.99296	1	0.396919	0.244494	-1.62343	0.104497	0.34312	-0.285015	0.244022	-1.16799	0.242811	0.701738	-0.525788	0.242644	-2.16691	0.0302417	0.0919545	-0.506119	0.241487	-2.09584	0.0360962	0.0973515	-0.362842	0.241	-1.50557	0.132178	0.282655	-0.813337	0.242676	-3.35153	0.000803668	0.00423041	-0.19747	0.239324	-0.825113	0.409307	1	-0.0218246
Alkbh6	ENSRNOG00000047943	alkB homolog 6 [Source:RGD Symbol;Acc:1566318]	5.43949	0.0414573	0.400027	0.103636	0.917458	NA	-0.0806393	0.399884	0.201657	0.840185	NA	-0.285358	0.396992	0.718802	0.472263	0.752368	0.246176	0.396848	0.620329	0.535041	NA	0.365673	0.398667	0.917237	0.359018	NA	-0.246156	0.40473	-0.608199	0.543055	NA	-0.582591	0.401631	-1.45056	0.146902	NA	0.313727	0.399925	0.784464	0.432768	NA	0.60134	0.404628	1.48616	0.137238	1	0.692468
Alkbh7	ENSRNOG00000047089	alkB homolog 7 [Source:RGD Symbol;Acc:1598126]	1615.51	-0.442498	0.1807	-2.4488	0.0143333	0.147828	0.196538	0.1809	-1.08645	0.277282	0.536304	-0.10104	0.180559	0.559594	0.575756	0.821663	-0.144921	0.180759	-0.801736	0.422706	0.834777	1.45508	0.18221	7.98573	1.39689e-15	6.11636e-14	0.992215	0.181484	5.46724	4.57106e-08	5.7797e-07	1.48416	0.181607	8.17234	3.02464e-16	1.4279e-14	1.57693	0.181631	8.68207	3.88633e-18	1.6186e-16	0.142218	0.18241	0.77966	0.435591	1	0.266328
Alkbh8	ENSRNOG00000024525	alkB homolog 8, tRNA methyltransferase [Source:RGD Symbol;Acc:1304687]	113.635	-1.16895	0.406571	-2.87515	0.00403835	0.0737872	0.818497	0.407988	-2.00618	0.0448372	0.179107	-0.387443	0.403326	0.96062	0.336743	0.641134	0.0369877	0.404762	0.0913813	0.92719	0.996251	-1.06434	0.40032	-2.65873	0.00784369	0.0311394	-1.842	0.403004	-4.57068	4.86134e-06	4.15032e-05	-1.31121	0.399372	-3.28318	0.00102644	0.00576486	-0.734787	0.398635	-1.84326	0.065291	0.160348	-0.061738	0.394949	-0.156319	0.875781	1	-0.0408353
Allc	NA	NA	13.4438	-0.482713	0.351842	-1.37196	0.170076	0.500058	0.155397	0.351196	-0.442481	0.658141	0.843145	-0.48067	0.351465	1.36762	0.171432	0.451844	0.153354	0.350818	0.437132	0.662016	0.938204	-0.224603	0.352246	-0.637631	0.523714	0.698265	-0.333436	0.352696	-0.945392	0.344459	0.51693	-0.432576	0.352406	-1.22749	0.219637	NA	0.118661	0.353016	0.336133	0.73677	0.848159	-0.0306169	0.353869	-0.0865204	0.931053	1	-0.0465645
Alms1	ENSRNOG00000022343	Alstrom syndrome protein 1 [Source:RGD Symbol;Acc:1311590]	258.437	0.680489	0.37532	1.81309	0.0698181	0.328748	-1.29215	0.376904	3.42832	0.000607326	0.00850323	0.648671	0.375565	-1.72719	0.0841344	0.301505	-1.26033	0.377148	-3.34174	0.000832543	0.0622035	-0.823575	0.377194	-2.18342	0.0290047	0.0890415	0.516418	0.373889	1.38121	0.167215	0.311913	0.229119	0.373879	0.612815	0.539999	0.717172	-0.225386	0.375458	-0.600295	0.548309	0.710411	-0.061315	0.374027	-0.163932	0.869785	1	-0.047844
Alox12	ENSRNOG00000027037	arachidonate 12-lipoxygenase [Source:RGD Symbol;Acc:1311159]	22.9995	0.57797	0.423188	1.36575	0.172016	0.502653	-0.0773975	0.424448	0.182349	0.855309	0.947313	0	0.421634	0	1	1	0.506167	0.422897	1.1969	0.231344	0.689891	-0.271157	0.425022	-0.637983	0.523485	0.698115	-0.349613	0.426013	-0.820663	0.411838	0.581592	-0.929807	0.424431	-2.19071	0.0284727	0.090802	-0.617417	0.423709	-1.45717	0.145068	0.291269	0.310166	0.426531	0.727183	0.467114	1	0.155854
Alox12b	ENSRNOG00000022210	arachidonate 12-lipoxygenase, 12R type [Source:RGD Symbol;Acc:1305330]	1.00586	0	0.100956	0	1	NA	0	0.100968	0	1	NA	0	0.100851	0	1	NA	0	0.100864	0	1	NA	0	0.10109	0	1	NA	0	0.101348	0	1	NA	0	0.101228	0	1	NA	0	0.10113	0	1	NA	0	0.101521	0	1	1	0
Alox15	ENSRNOG00000019183	arachidonate 15-lipoxygenase [Source:RGD Symbol;Acc:70493]	12.9839	0.0548061	0.375085	0.146117	0.883829	0.970538	-0.0261594	0.375262	0.0697096	0.944425	0.98468	0.483147	0.375811	-1.28561	0.198578	0.488999	-0.4545	0.375988	-1.20882	0.226733	0.684344	-1.0031	0.377827	-2.65491	0.00793288	0.0314147	-0.0838566	0.377597	-0.22208	0.824252	0.897014	-0.540891	0.379804	-1.42413	0.154409	NA	-0.0655619	0.376043	-0.174347	0.861593	0.923949	0.0731008	0.378551	0.193107	0.846875	1	-0.893082
Alox15b	ENSRNOG00000007778	arachidonate 15-lipoxygenase, type B [Source:RGD Symbol;Acc:628809]	1.22271	0	0.10131	0	1	NA	0	0.10132	0	1	NA	0	0.101225	0	1	NA	0	0.101235	0	1	NA	0	0.10142	0	1	NA	-0.0920339	0.101663	-0.905281	0.365316	NA	0	0.101533	0	1	NA	-0.0598282	0.101474	-0.589592	0.555464	NA	0.0320855	0.101827	0.315098	0.752687	1	0.0921061
Alox5	ENSRNOG00000012972	arachidonate 5-lipoxygenase [Source:RGD Symbol;Acc:2096]	56.8489	0.535441	0.457247	1.17101	0.241595	0.582932	-0.169948	0.457421	0.371534	0.71024	0.873693	-0.148295	0.456917	0.324555	0.745518	0.91486	0.513788	0.457091	1.12404	0.260997	0.718013	0.659374	0.457213	1.44216	0.149258	0.3057	0.670993	0.457484	1.4667	0.142457	0.276233	-0.196418	0.457203	-0.429608	0.667481	0.81031	-0.498341	0.457321	-1.0897	0.275847	0.453688	-0.633893	0.457557	-1.38539	0.165935	1	0.158328
Alox5ap	ENSRNOG00000000907	arachidonate 5-lipoxygenase activating protein [Source:RGD Symbol;Acc:2097]	94.3677	-0.0342625	0.458355	-0.0747511	0.940413	0.988837	0.0388126	0.458346	-0.0846796	0.932516	0.979284	0.132794	0.458356	-0.289719	0.772031	0.925493	-0.128244	0.458348	-0.279797	0.779633	0.97006	-0.372736	0.458167	-0.813537	0.41591	0.604609	-0.27104	0.458071	-0.591699	0.554052	0.705251	-0.163529	0.458067	-0.356999	0.721092	0.846544	-0.334739	0.458161	-0.730616	0.465014	0.639738	-0.0979614	0.457875	-0.213948	0.830588	1	-0.140508
Aloxe3	ENSRNOG00000007454	arachidonate lipoxygenase 3 [Source:RGD Symbol;Acc:1306252]	55.2052	0.840583	0.460193	1.82659	0.0677614	0.324172	-0.618585	0.460321	1.34381	0.179009	0.420834	0.332547	0.460013	-0.722907	0.469737	0.751159	-0.110549	0.460143	-0.240249	0.810137	0.974758	-0.852039	0.460386	-1.8507	0.0642121	0.164576	-0.589874	0.460699	-1.28039	0.200409	0.35513	-0.702264	0.460492	-1.52503	0.127251	0.275482	-1.32074	0.460293	-2.86933	0.00411337	0.0171044	0.109721	0.460794	0.238114	0.811793	1	0.356419
Alpi	ENSRNOG00000030020	alkaline phosphatase, intestinal [Source:RGD Symbol;Acc:2099]	0	NA	NA	NA	NA	NA	NA	NA	NA	NA	NA	NA	NA	NA	NA	NA	NA	NA	NA	NA	NA	NA	NA	NA	NA	NA	NA	NA	NA	NA	NA	NA	NA	NA	NA	NA	NA	NA	NA	NA	NA	NA	NA	NA	NA	NA	NA
Alpk3	ENSRNOG00000011659	alpha-kinase 3 [Source:RGD Symbol;Acc:1309860]	4.48699	-0.0157771	0.213894	-0.0737612	0.9412	NA	0	0.213898	0	1	NA	-0.0153382	0.213656	0.0717895	0.942769	0.994542	0	0.21366	0	1	NA	-0.348927	0.214529	-1.62648	0.103848	NA	-0.153985	0.214914	-0.716493	0.473687	NA	-0.0872405	0.214581	-0.406562	0.68433	NA	-0.0221781	0.21433	-0.103476	0.917585	NA	0.116029	0.215349	0.538796	0.590028	1	-0.195744
Alpl	ENSRNOG00000013954	alkaline phosphatase, liver/bone/kidney [Source:RGD Symbol;Acc:2100]	243.637	-0.0523603	0.396828	-0.131947	0.895026	0.974405	-0.134223	0.397062	0.338039	0.735334	0.887446	-0.255707	0.397295	0.643619	0.519822	0.786101	0.069124	0.397529	0.173884	0.861956	0.984821	0.0296285	0.396993	0.0746324	0.940507	0.969158	0.000195984	0.396148	0.000494724	0.999605	1	0.118529	0.396959	0.298593	0.765251	0.871861	0.0165208	0.396466	0.0416701	0.966762	0.983029	-0.0360355	0.395785	-0.0910481	0.927454	1	0.163655
Als2	ENSRNOG00000023280	amyotrophic lateral sclerosis 2 (juvenile) [Source:RGD Symbol;Acc:1310372]	110.525	0.129371	0.460992	0.280636	0.77899	0.929615	-0.566245	0.460999	1.2283	0.219334	0.469824	-1.04989	0.461004	2.27739	0.022763	0.13572	0.613012	0.461009	1.32972	0.183612	0.645811	-1.05761	0.460981	-2.29426	0.0217756	0.070893	-0.133375	0.460966	-0.289338	0.772323	0.865833	-1.66037	0.460973	-3.60187	0.000315939	0.00209704	-0.512323	0.460973	-1.1114	0.266398	0.443026	-0.249578	0.460946	-0.541447	0.5882	1	-0.357989
Als2cr12	ENSRNOG00000024917	amyotrophic lateral sclerosis 2 (juvenile) chromosome region, candidate 12 [Source:RGD Symbol;Acc:1359362]	23.7869	0.128084	0.405595	0.315794	0.752159	0.918587	0.089752	0.405955	-0.221089	0.825023	0.933899	-0.0988427	0.405036	0.244035	0.807204	0.940894	0.316679	0.405396	0.78116	0.434708	0.840113	0.539601	0.405664	1.33017	0.183463	0.354662	0.344503	0.406265	0.847977	0.396451	0.567582	-0.469989	0.406259	-1.15687	0.247326	0.43673	0.195596	0.405612	0.482225	0.629646	0.773663	-0.0208225	0.406281	-0.0512513	0.959125	1	0.105346
Alx1	ENSRNOG00000004390	ALX homeobox 1 [Source:RGD Symbol;Acc:2273]	18.4931	0.201569	0.407307	0.494882	0.620683	0.856578	-0.363121	0.406948	0.892303	0.37223	0.630294	0.505271	0.407517	-1.23988	0.215021	0.507963	-0.666823	0.407159	-1.63775	0.101474	0.546468	-0.486068	0.407472	-1.19289	0.232913	0.416273	0.215186	0.408594	0.52665	0.598437	0.738971	0.412383	0.408911	1.00849	0.313219	0.509533	-0.149798	0.40774	-0.367385	0.713332	0.832891	-0.163415	0.409027	-0.399521	0.689509	1	-0.338133
Alx3	ENSRNOG00000018290	ALX homeobox 3 [Source:RGD Symbol;Acc:1359270]	38.8171	1.14267	0.448488	2.54783	0.0108397	0.126965	0.137127	0.449998	-0.304727	0.760574	0.900911	0.977073	0.448249	-2.17976	0.0292756	0.160717	0.302723	0.44976	0.673076	0.500899	0.871931	0.602687	0.449837	1.33979	0.180314	0.350358	0.146232	0.450235	0.32479	0.74534	0.848727	-0.170761	0.450058	-0.37942	0.704376	0.834916	-0.321133	0.448125	-0.716615	0.473612	0.646659	0.675304	0.449875	1.50109	0.133332	1	0.319328
Alx4	ENSRNOG00000000008	ALX homeobox 4 [Source:RGD Symbol;Acc:1310201]	2.96149	0	0.219139	0	1	NA	0.023461	0.219239	-0.107011	0.91478	NA	0	0.218759	0	1	NA	0.022733	0.218859	0.103871	0.917272	NA	-0.19494	0.220054	-0.885874	0.375686	NA	-0.148699	0.2208	-0.673454	0.500659	NA	-0.168973	0.220402	-0.766659	0.443284	NA	-0.165171	0.220042	-0.750636	0.452872	NA	-0.0178824	0.221699	-0.0806604	0.935712	1	-0.0697022
Alyref	ENSRNOG00000036687	Aly/REF export factor [Source:RGD Symbol;Acc:1594679]	1558.63	-0.637398	0.221229	-2.88117	0.00396205	0.0734418	0.554857	0.221301	-2.50725	0.0121674	0.0752644	0.0649592	0.220629	-0.294427	0.768431	0.92411	-0.1475	0.220701	-0.668325	0.503926	0.872651	-0.287255	0.220277	-1.30406	0.192212	0.364994	-0.656757	0.220621	-2.97686	0.00291214	0.0120231	-0.187135	0.219894	-0.851023	0.394757	0.590528	0.0616386	0.220313	0.279777	0.779648	0.874807	0.0809975	0.219702	0.36867	0.712373	1	-0.185355
Amacr	ENSRNOG00000018662	alpha-methylacyl-CoA racemase [Source:RGD Symbol;Acc:3048]	454.946	0.0462195	0.325446	0.142019	0.887065	0.972517	-0.512125	0.326333	1.56933	0.11657	0.323251	0.0115292	0.325739	-0.035394	0.971766	1	-0.477435	0.326625	-1.46172	0.143818	0.607328	-0.611065	0.325944	-1.87475	0.0608269	0.158121	-0.0271141	0.324433	-0.0835737	0.933395	0.963081	0.0641722	0.324899	0.197514	0.843425	0.918738	-0.0406511	0.325052	-0.12506	0.900476	0.947858	0.0326825	0.324038	0.10086	0.919662	1	-0.0718251
Ambp	ENSRNOG00000006889	alpha-1-microglobulin/bikunin precursor [Source:RGD Symbol;Acc:2102]	2.65624	0	0.166298	0	1	NA	0	0.166322	0	1	NA	0	0.166097	0	1	NA	0	0.166121	0	1	NA	-0.24495	0.166772	-1.46877	0.141894	NA	-0.0189095	0.167068	-0.113185	0.909884	NA	-0.403073	0.167135	-2.41166	0.0158802	NA	0	0.166632	0	1	NA	0.0193442	0.167401	0.115556	0.908005	1	-0.226516
Ambra1	ENSRNOG00000017422	autophagy/beclin 1 regulator 1 [Source:RGD Symbol;Acc:621330]	713.93	0.277306	0.260168	1.06587	0.286482	0.623407	0.374429	0.259145	-1.44486	0.148497	0.375823	0.541892	0.260055	-2.08376	0.0371819	0.184707	0.109844	0.259031	0.424056	0.671525	0.941561	0.864017	0.259507	3.32945	0.000870169	0.00488471	0.358502	0.25922	1.383	0.166664	0.311166	0.51889	0.259019	2.00329	0.0451465	0.129155	-0.130291	0.259943	-0.50123	0.616209	0.763864	-0.211487	0.258993	-0.816573	0.414172	1	0.131085
Amd1	ENSRNOG00000000585	adenosylmethionine decarboxylase 1 [Source:RGD Symbol;Acc:2104]	4059.47	-0.00386156	0.135896	-0.0284156	0.977331	0.998067	0.11613	0.135807	-0.855113	0.392489	0.647645	-0.0399111	0.136024	0.293412	0.769207	0.924527	0.152179	0.135935	1.1195	0.262927	0.718865	0.350842	0.13581	2.58333	0.00978505	0.0374275	0.235464	0.135618	1.73623	0.0825237	0.185175	0.0899644	0.135708	0.662925	0.507379	0.689985	0.300996	0.135873	2.21528	0.0267406	0.079785	0.061671	0.135595	0.454818	0.64924	1	-0.000751833
Amdhd1	ENSRNOG00000005266	amidohydrolase domain containing 1 [Source:RGD Symbol;Acc:1308879]	3.32491	-0.347607	0.179319	-1.93848	0.0525642	NA	0	0.178937	0	1	NA	-0.347332	0.179127	1.93903	0.0524977	NA	0	0.178745	0	1	NA	0	0.179162	0	1	NA	-0.101534	0.179719	-0.564961	0.5721	NA	0	0.179417	0	1	NA	0.329858	0.179654	1.83607	0.0663468	NA	0.0837854	0.180054	0.465336	0.641691	1	0.101856
Amdhd2	ENSRNOG00000006460	amidohydrolase domain containing 2 [Source:RGD Symbol;Acc:1304601]	406.237	-0.734178	0.292765	-2.50774	0.0121508	0.134597	1.02876	0.291953	-3.5237	0.000425568	0.0064217	0.383986	0.290091	-1.32368	0.18561	0.470999	-0.0894094	0.28927	-0.309086	0.757256	0.962366	-0.32017	0.28822	-1.11085	0.266632	0.454131	-0.94434	0.290815	-3.24722	0.00116539	0.005435	0.0403075	0.287966	0.139973	0.888681	0.94249	-0.249944	0.289416	-0.863614	0.3878	0.568128	-0.0397819	0.28744	-0.138401	0.889924	1	-0.404585
Amelx	ENSRNOG00000003965	amelogenin, X-linked [Source:RGD Symbol;Acc:2107]	0.802286	0	0.100309	0	1	NA	0	0.100326	0	1	NA	0.234688	0.100356	-2.33854	0.0193591	NA	-0.234699	0.100373	-2.33828	0.0193728	NA	0	0.100488	0	1	NA	-0.0210599	0.100844	-0.208838	0.834575	NA	0.235047	0.100857	2.33049	0.0197804	NA	0	0.100541	0	1	NA	0.021226	0.101074	0.210004	0.833665	1	0.0211765
Amer1	ENSRNOG00000007984	APC membrane recruitment protein 1 [Source:RGD Symbol;Acc:1560322]	41.1552	0.584582	0.43823	1.33396	0.182216	0.515404	-0.995878	0.437772	2.27488	0.0229132	0.116352	-0.415915	0.437253	0.951202	0.341502	0.645118	0.00461894	0.436794	0.0105746	0.991563	1	-0.570223	0.437658	-1.3029	0.19261	0.365577	0.581088	0.438785	1.32431	0.185399	0.335279	-0.303514	0.43771	-0.693413	0.488051	0.675661	-0.174347	0.438189	-0.397882	0.690718	0.816724	-0.170854	0.438744	-0.389416	0.696968	1	-0.155434
Amh	ENSRNOG00000019377	anti-Mullerian hormone [Source:RGD Symbol;Acc:2108]	3.26656	-0.321501	0.209393	-1.5354	0.124687	NA	0.237224	0.209279	-1.13353	0.256992	NA	-0.320959	0.209089	1.53504	0.124775	NA	0.236682	0.208975	1.13259	0.257388	NA	0.22493	0.209654	1.07287	0.283331	NA	-0.0982472	0.210068	-0.467693	0.640004	NA	-0.0683608	0.209684	-0.326018	0.744411	NA	0.322409	0.2099	1.53601	0.124536	NA	0.0991551	0.210574	0.470879	0.637727	1	0.0859537
Amhr2	ENSRNOG00000014850	anti-Mullerian hormone receptor, type II [Source:RGD Symbol;Acc:70964]	15.9907	-0.0922301	0.332	-0.277801	0.781165	0.930678	0.0940564	0.332036	-0.283272	0.776968	0.910239	0.776758	0.332879	-2.33346	0.0196241	0.123137	-0.774932	0.332914	-2.32773	0.0199267	0.29072	-0.346286	0.332886	-1.04025	0.298223	0.488491	-0.200554	0.333134	-0.602022	0.54716	0.700385	0.614759	0.334031	1.84042	0.0657059	NA	-0.203746	0.332814	-0.61219	0.540412	0.703859	-0.0954219	0.333946	-0.285741	0.775077	1	-0.239788
Amigo1	ENSRNOG00000045665	adhesion molecule with Ig like domain 1 [Source:RGD Symbol;Acc:1303079]	120.445	-0.742105	0.379432	-1.95583	0.0504852	0.283424	0.307893	0.382627	-0.804681	0.421004	0.67287	-0.413545	0.378163	1.09356	0.274146	0.575314	-0.0206673	0.381373	-0.0541919	0.956782	0.999269	-1.41096	0.372551	-3.78729	0.000152302	0.00106931	-1.98342	0.371605	-5.33743	9.42751e-08	1.12618e-06	-1.56453	0.370568	-4.22199	2.42154e-05	0.00021696	-1.56198	0.367703	-4.24795	2.15735e-05	0.000170705	-0.320672	0.359516	-0.891957	0.372416	1	0.264567
Amigo2	ENSRNOG00000007032	adhesion molecule with Ig like domain 2 [Source:RGD Symbol;Acc:727911]	145.673	0.127771	0.387528	0.329707	0.741621	0.914009	-2.14015	0.397634	5.38222	7.35727e-08	5.69398e-06	-3.08907	0.408016	7.57094	3.7052e-14	1.83849e-11	1.07668	0.417326	2.57996	0.0098813	0.203707	-1.89387	0.397668	-4.76244	1.91262e-06	2.07664e-05	0.0266467	0.385878	0.0690547	0.944946	0.969159	-2.71561	0.407383	-6.66599	2.62892e-11	6.53341e-10	-0.515896	0.386379	-1.33521	0.181809	0.341876	-0.414773	0.384722	-1.07811	0.280985	1	0.219636
Amigo3	NA	NA	35.2873	0.675314	0.45318	1.49017	0.13618	0.450583	0.00457488	0.452116	-0.0101188	0.991926	1	-0.0281015	0.454373	0.0618468	0.950685	0.997128	0.707991	0.453326	1.56177	0.118342	0.57726	0.97222	0.453103	2.14569	0.0318977	0.096258	1.01692	0.452607	2.2468	0.0246526	0.0715943	0.107823	0.453561	0.237725	0.812095	0.898802	0.0805749	0.453688	0.1776	0.859037	0.922733	-0.26103	0.453119	-0.576074	0.564565	1	-0.0492745
Ammecr1l	ENSRNOG00000016250	AMME chromosomal region gene 1-like [Source:RGD Symbol;Acc:1307915]	371.703	0.287989	0.348248	0.826965	0.408257	0.719634	-0.101456	0.347889	0.291632	0.770568	0.90691	-0.257735	0.349396	0.737659	0.460722	0.745665	0.444268	0.34904	1.27283	0.203078	0.662409	-0.352018	0.347378	-1.01336	0.31089	0.501757	-0.114857	0.346793	-0.331199	0.740495	0.84542	-0.502841	0.348131	-1.4444	0.148626	0.307479	-0.301206	0.347858	-0.865886	0.386553	0.567263	0.10164	0.346401	0.293418	0.769202	1	-0.135705
Amn	ENSRNOG00000009050	amnion associated transmembrane protein [Source:RGD Symbol;Acc:1308634]	21.5148	-1.2277	0.4325	-2.83861	0.00453104	0.0789084	0.560443	0.431281	-1.29949	0.193777	0.440365	-0.0654649	0.434488	0.150671	0.880235	0.973633	-0.601792	0.433274	-1.38894	0.16485	0.628749	-0.181205	0.433246	-0.418251	0.675764	0.814013	-0.491052	0.43243	-1.13557	0.256138	0.421867	0.910653	0.433958	2.09848	0.0358625	0.108177	0.331946	0.4348	0.763445	0.445198	0.622197	-0.404702	0.43473	-0.930928	0.351891	1	-0.250596
Amn1	ENSRNOG00000036917	antagonist of mitotic exit network 1 homolog [Source:RGD Symbol;Acc:1308119]	622	-0.552885	0.287377	-1.9239	0.0543675	0.294749	0.306787	0.287734	-1.06622	0.286324	0.545758	-0.183885	0.287065	0.640568	0.521804	0.786848	-0.0622124	0.287422	-0.21645	0.828637	0.978176	-0.173596	0.286782	-0.605322	0.544965	0.714962	-0.349306	0.28678	-1.21803	0.223214	0.382777	0.0428913	0.286528	0.149694	0.881006	0.938404	0.0652475	0.286309	0.227892	0.81973	0.898198	-0.138331	0.285709	-0.484169	0.628266	1	-0.131077
Amotl2	ENSRNOG00000008487	angiomotin like 2 [Source:RGD Symbol;Acc:70977]	539.665	0.84847	0.261481	3.24486	0.00117509	0.0368469	0.122539	0.258578	-0.473893	0.635576	0.829913	1.05945	0.261412	-4.05279	5.06109e-05	0.00170213	-0.0884373	0.258508	-0.342107	0.732271	0.956501	0.728884	0.259368	2.81023	0.00495066	0.0211762	0.268265	0.258046	1.0396	0.298525	0.467625	0.476056	0.258029	1.84497	0.0650413	0.169151	-0.652265	0.261237	-2.49683	0.0125309	0.0428994	-0.0720605	0.257799	-0.279522	0.779844	1	0.33808
Ampd1	ENSRNOG00000018656	adenosine monophosphate deaminase 1 [Source:RGD Symbol;Acc:2109]	0.638871	0	0.100041	0	1	NA	0	0.100041	0	1	NA	0	0.0998948	0	1	NA	0	0.0998948	0	1	NA	0	0.100228	0	1	NA	0	0.100511	0	1	NA	0	0.100342	0	1	NA	0	0.100308	0	1	NA	0	0.100777	0	1	1	0
Ampd2	ENSRNOG00000019240	adenosine monophosphate deaminase 2 [Source:RGD Symbol;Acc:2110]	865.378	-0.0721774	0.225512	-0.32006	0.748923	0.91695	0.0844754	0.225457	-0.374685	0.707895	0.87193	-0.472401	0.226601	2.08473	0.037094	0.184707	0.484699	0.226546	2.13951	0.0323943	0.349942	0.236827	0.225341	1.05097	0.293272	0.483217	-0.297035	0.224254	-1.32455	0.185321	0.335237	-0.0937031	0.226137	-0.414365	0.678607	0.818324	-0.194356	0.22474	-0.864805	0.387146	0.567576	0.0305017	0.223478	0.136486	0.891437	1	0.449387
Ampd3	ENSRNOG00000018262	adenosine monophosphate deaminase 3 [Source:RGD Symbol;Acc:2111]	454.473	0.763137	0.283794	2.68905	0.0071655	0.0996302	-0.154366	0.282165	0.547077	0.584326	0.795355	0.430778	0.284711	-1.51304	0.130271	0.387866	0.177993	0.283088	0.628754	0.52951	0.883535	0.246685	0.282445	0.873389	0.382451	0.573158	0.0316336	0.280874	0.112625	0.910328	0.949236	0.161823	0.282523	0.572777	0.566795	0.737078	-0.62517	0.283509	-2.20511	0.0274461	0.0814922	0.106334	0.280586	0.37897	0.70471	1	0.369417
Amph	NA	NA	654.256	0.32522	0.311221	1.04498	0.296032	0.631608	-0.195523	0.310735	0.629229	0.529199	0.756015	0.0969692	0.312254	-0.310546	0.756146	0.918484	0.0327274	0.31177	0.104973	0.916397	0.994668	-1.75261	0.30839	-5.68311	1.32269e-08	2.15807e-07	-1.56937	0.306943	-5.11291	3.17228e-07	3.46087e-06	-1.77967	0.308025	-5.77766	7.5745e-09	1.29983e-07	-2.05879	0.308706	-6.66911	2.57368e-11	5.31462e-10	-0.164201	0.304386	-0.539452	0.589575	1	0.0122857
Amt	ENSRNOG00000050214	aminomethyltransferase [Source:RGD Symbol;Acc:1359408]	349.504	-0.463791	0.303663	-1.52732	0.126682	0.435573	-0.850178	0.307721	2.76282	0.00573051	0.0447618	-1.02623	0.305729	3.35666	0.000788896	0.0136795	-0.28774	0.309755	-0.928927	0.352927	0.787145	-0.926412	0.307129	-3.01637	0.00255825	0.0123117	-0.416799	0.30263	-1.37726	0.168433	0.313439	-0.65584	0.305218	-2.14875	0.0316538	0.0984251	0.378185	0.30286	1.24871	0.211769	0.379296	0.331194	0.301823	1.09731	0.272505	1	0.340565
Amtn	ENSRNOG00000003776	amelotin [Source:RGD Symbol;Acc:1592356]	1.08032	0	0.101088	0	1	NA	0.106034	0.101166	-1.04811	0.294586	NA	0.102525	0.10105	-1.0146	0.310296	NA	0.00337143	0.101128	0.0333382	0.973405	NA	0.106116	0.10128	1.04775	0.294755	NA	-0.0067002	0.101456	-0.0660403	0.947346	NA	0.102779	0.101401	1.01359	0.31078	NA	0	0.10125	0	1	NA	0.00681722	0.101618	0.0670868	0.946513	1	0.00678243
Amy1a	ENSRNOG00000033529	amylase, alpha 1A (salivary) [Source:RGD Symbol;Acc:2113]	3.13178	0.0741003	0.102262	0.72461	0.468691	NA	-0.0741032	0.102266	0.72461	0.468691	NA	0	0.102215	0	1	NA	0	0.102219	0	1	NA	0	0.102292	0	1	NA	0.0489212	0.102393	0.477777	0.632809	NA	-0.0320785	0.102342	-0.313444	0.753943	NA	-0.0210281	0.102308	-0.205536	0.837153	NA	0.00415107	0.102439	0.0405222	0.967677	1	0.0252565
Amy2a3	ENSRNOG00000055613	amylase 2a3 [Source:RGD Symbol;Acc:1593187]	0	NA	NA	NA	NA	NA	NA	NA	NA	NA	NA	NA	NA	NA	NA	NA	NA	NA	NA	NA	NA	NA	NA	NA	NA	NA	NA	NA	NA	NA	NA	NA	NA	NA	NA	NA	NA	NA	NA	NA	NA	NA	NA	NA	NA	NA	NA
Amz1	ENSRNOG00000024264	archaelysin family metallopeptidase 1 [Source:RGD Symbol;Acc:1311314]	139.407	-0.0677228	0.446875	-0.151548	0.879544	0.969035	-0.571388	0.447611	1.27653	0.201769	0.449781	-0.511545	0.447502	1.14311	0.252992	0.551513	-0.127566	0.448234	-0.284597	0.775953	0.968698	-0.840645	0.447253	-1.87957	0.0601661	0.156843	-1.02036	0.445867	-2.28849	0.0221093	0.0657412	-0.908996	0.446746	-2.03471	0.0418805	0.122009	-0.879501	0.446135	-1.97138	0.0486809	0.127934	0.0731373	0.445122	0.164308	0.869488	1	0.751104
Amz2	ENSRNOG00000000246	archaelysin family metallopeptidase 2 [Source:RGD Symbol;Acc:1304846]	1811.62	-0.0727264	0.191892	-0.378996	0.704691	0.898597	-0.186114	0.192146	0.968605	0.332742	0.594553	-0.160607	0.192124	0.835956	0.40318	0.701189	-0.0982328	0.192378	-0.510624	0.609614	0.914462	0.175968	0.19226	0.915263	0.360054	0.551298	0.125656	0.191488	0.656206	0.511692	0.67008	0.363117	0.192002	1.89122	0.0585956	0.156722	0.161453	0.191705	0.842193	0.39968	0.579814	-0.0369292	0.191301	-0.193043	0.846926	1	0.236426
Anapc1	ENSRNOG00000016965	anaphase promoting complex subunit 1 [Source:RGD Symbol;Acc:1306629]	519.951	0.155967	0.26501	0.588534	0.556174	0.821641	-0.339604	0.265337	1.2799	0.20058	0.448241	-0.355716	0.266178	1.33638	0.181425	0.465535	0.172079	0.266504	0.64569	0.51848	0.881023	0.472563	0.266297	1.77457	0.0759686	0.186491	0.961027	0.265233	3.62334	0.000290828	0.00159348	0.389212	0.266348	1.46129	0.143935	0.301168	0.520679	0.265523	1.96096	0.0498838	0.130483	-0.28438	0.265745	-1.07013	0.284563	1	-0.148859
Anapc10	ENSRNOG00000018296	anaphase promoting complex subunit 10 [Source:RGD Symbol;Acc:1308936]	156.59	-0.776585	0.460534	-1.68627	0.0917441	0.374049	0.686586	0.460541	-1.49082	0.136008	0.355005	-0.517091	0.460524	1.12283	0.261509	0.56182	0.427092	0.460531	0.92739	0.353724	0.787147	-0.327308	0.460433	-0.71087	0.477165	0.65927	-1.04078	0.460465	-2.26028	0.0238038	0.0696874	-0.822086	0.460454	-1.78538	0.0741996	0.186291	-0.392297	0.460411	-0.852057	0.394182	0.573661	-0.128101	0.46034	-0.278276	0.780801	1	0.0268861
Anapc11	ENSRNOG00000036686	anaphase promoting complex subunit 11 [Source:RGD Symbol;Acc:1561880]	4522.24	-0.341894	0.163671	-2.08891	0.0367161	0.243178	0.233393	0.163708	-1.42567	0.153964	0.383857	-0.017246	0.163614	0.105407	0.916053	0.987811	-0.0912548	0.16365	-0.557621	0.577103	0.903432	0.832895	0.163874	5.08253	3.72438e-07	4.73051e-06	0.702818	0.163827	4.28999	1.78684e-05	0.000134646	0.804871	0.163682	4.91728	8.77558e-07	1.06788e-05	1.10408	0.163866	6.73769	1.60928e-11	3.40879e-10	0.059366	0.164022	0.361939	0.717398	1	-0.103315
Anapc13	ENSRNOG00000008459	anaphase promoting complex subunit 13 [Source:RGD Symbol;Acc:1583270]	1777.65	-0.154255	0.141899	-1.08707	0.277004	0.61383	0.0410542	0.141995	-0.289125	0.772486	0.907146	-0.145765	0.142049	1.02616	0.304814	0.607134	0.032565	0.142144	0.229098	0.818793	0.976708	1.48576	0.143633	10.3441	4.44935e-25	6.37793e-23	1.56036	0.143337	10.886	1.34468e-27	1.8626e-25	1.57838	0.143571	10.9937	4.09556e-28	8.44618e-26	1.80468	0.143737	12.5554	3.7132e-36	7.6294e-34	0.0900582	0.145157	0.620422	0.53498	1	-0.115656
Anapc15	ENSRNOG00000019936	anaphase promoting complex subunit 15 [Source:RGD Symbol;Acc:1311634]	905.85	-0.0404596	0.19737	-0.204993	0.837577	0.95327	-0.113603	0.197588	0.574951	0.565324	0.781456	-0.0288866	0.197583	0.1462	0.883764	0.974982	-0.125176	0.197801	-0.632841	0.526837	0.883222	0.547993	0.198219	2.76458	0.00569967	0.0237884	0.894026	0.197775	4.52041	6.17192e-06	5.13757e-05	1.04853	0.198325	5.28694	1.24376e-07	1.77432e-06	0.904798	0.198167	4.56584	4.9749e-06	4.49968e-05	-0.0296873	0.19857	-0.149506	0.881155	1	-0.232429
Anapc2	ENSRNOG00000011295	anaphase promoting complex subunit 2 [Source:RGD Symbol;Acc:1305546]	1805.62	-0.255376	0.199833	-1.27795	0.201266	0.538544	0.344202	0.199707	-1.72353	0.0847923	0.268151	-0.0612255	0.199807	0.306424	0.759282	0.920037	0.150051	0.199681	0.751452	0.452381	0.850015	-0.171027	0.199025	-0.859322	0.390163	0.580281	-0.809376	0.19881	-4.0711	4.67924e-05	0.000319411	-0.512058	0.198859	-2.57498	0.0100246	0.0395037	-0.551739	0.198905	-2.77388	0.00553924	0.0219434	0.00226026	0.197878	0.0114225	0.990886	1	0.294147
Anapc4	ENSRNOG00000004130	anaphase promoting complex subunit 4 [Source:RGD Symbol;Acc:1306572]	825.013	0.146068	0.246159	0.593387	0.552922	0.820645	0.0932263	0.245761	-0.379337	0.704437	0.869678	0.00289895	0.24659	-0.0117562	0.99062	1	0.236395	0.246193	0.960202	0.336953	0.774827	0.360924	0.245809	1.46831	0.142019	0.295295	0.0825474	0.245163	0.336703	0.73634	0.842635	0.270859	0.246015	1.10098	0.270904	0.46297	-0.16275	0.245773	-0.662197	0.507845	0.675983	-0.0992297	0.244776	-0.405391	0.68519	1	0.185151
Anapc5	ENSRNOG00000001316	anaphase-promoting complex subunit 5 [Source:RGD Symbol;Acc:1306125]	5289.06	-0.177405	0.125287	-1.41599	0.156779	0.483053	0.118156	0.125316	-0.942859	0.345753	0.607307	-0.100898	0.125349	0.804938	0.420856	0.715344	0.0416492	0.125379	0.332187	0.739748	0.958067	-0.296038	0.124986	-2.36856	0.0178573	0.0608764	-0.461337	0.12479	-3.69692	0.000218229	0.00122902	-0.295944	0.124898	-2.36948	0.0178129	0.0625608	-0.309525	0.124887	-2.47844	0.0131958	0.0447163	-0.0255928	0.124388	-0.20575	0.836986	1	0.0471437
Anapc7	ENSRNOG00000001283	anaphase promoting complex subunit 7 [Source:RGD Symbol;Acc:1311927]	495.343	-0.253746	0.335971	-0.755261	0.450092	0.751379	0.18448	0.336032	-0.548995	0.583009	0.79532	-0.0106142	0.335893	0.0315999	0.974791	1	-0.0586514	0.335954	-0.174582	0.861408	0.984821	0.150479	0.335763	0.448169	0.654031	0.797982	0.127077	0.335645	0.378605	0.704981	0.819829	0.165354	0.335415	0.492984	0.622024	0.776869	0.216067	0.335601	0.643823	0.51969	0.686663	-0.164755	0.335275	-0.491403	0.623141	1	-0.161079
Ang	NA	NA	20.8493	0.706965	0.427879	1.65225	0.0984831	0.389053	0.17744	0.430089	-0.412565	0.679925	0.856055	0.677812	0.427527	-1.58542	0.11287	0.359297	0.206593	0.429738	0.480742	0.6307	0.924454	-0.0293645	0.430699	-0.0681787	0.945643	0.970881	0.0831143	0.430723	0.192965	0.846987	0.910716	0.155829	0.430183	0.362238	0.717174	0.844059	-0.457649	0.428018	-1.06923	0.284967	0.464078	0.166201	0.430861	0.385743	0.699687	1	-0.289919
Ang2	ENSRNOG00000043032	angiogenin, ribonuclease A family, member 2 [Source:RGD Symbol;Acc:1359373]	0.0896019	0	0.0998606	0	1	NA	0	0.0998606	0	1	NA	0	0.0998606	0	1	NA	0	0.0998606	0	1	NA	0	0.0998606	0	1	NA	-0.0128295	0.0998606	-0.128475	0.897773	NA	0	0.0998606	0	1	NA	0	0.0998606	0	1	NA	0.0167415	0.0998606	0.167649	0.866859	1	0.0154238
Angel1	ENSRNOG00000010567	angel homolog 1 (Drosophila) [Source:RGD Symbol;Acc:1306238]	136.435	-0.261753	0.400876	-0.652952	0.513787	0.796205	0.316974	0.400685	-0.791079	0.428898	0.680058	-0.291769	0.401435	0.726814	0.46734	0.749748	0.34699	0.401245	0.864783	0.387158	0.814207	0.102119	0.399684	0.255499	0.798338	0.892387	-0.72372	0.398684	-1.81527	0.0694822	0.162292	-0.393193	0.399823	-0.983419	0.325401	0.521485	-0.221849	0.399221	-0.555704	0.578413	0.734673	0.240118	0.397014	0.60481	0.545305	1	0.508864
Angel2	ENSRNOG00000003795	angel homolog 2 (Drosophila) [Source:RGD Symbol;Acc:1305056]	654.207	-0.697468	0.293012	-2.38034	0.0172965	0.163276	0.585512	0.293191	-1.99703	0.0458219	0.181489	0.52562	0.291215	-1.80492	0.0710866	0.274495	-0.637577	0.291396	-2.18801	0.0286689	0.332994	-0.377259	0.291239	-1.29536	0.195196	0.369262	-1.14407	0.291549	-3.92412	8.7047e-05	0.000553896	0.0191119	0.289719	0.0659668	0.947404	0.974854	-0.557003	0.290684	-1.91618	0.0553419	0.141488	-0.110399	0.289207	-0.381728	0.702663	1	0.181302
Angpt1	ENSRNOG00000005854	angiopoietin 1 [Source:RGD Symbol;Acc:628896]	69.5077	0.702897	0.455721	1.54239	0.12298	0.429965	-1.10635	0.456029	2.42605	0.015264	0.0878156	0.271318	0.456013	-0.59498	0.551857	0.80583	-0.674773	0.45632	-1.47873	0.139213	0.602257	0.039076	0.456515	0.0855964	0.931787	0.966148	0.742686	0.455323	1.63112	0.102865	0.21834	0.53563	0.455757	1.17525	0.239894	0.427654	-0.10724	0.455833	-0.235262	0.814006	0.895616	-0.147029	0.455436	-0.322832	0.746822	1	0.402741
Angpt2	ENSRNOG00000016696	angiopoietin 2 [Source:RGD Symbol;Acc:621861]	37.6343	0.0439481	0.444698	0.098827	0.921276	0.983006	-0.204078	0.444553	0.459063	0.646189	0.836059	0.190218	0.444678	-0.427766	0.668821	0.877411	-0.350348	0.444534	-0.788124	0.430624	0.837861	-0.0646407	0.444618	-0.145385	0.884407	0.941034	0.330608	0.445035	0.742881	0.457554	0.622528	0.561925	0.444926	1.26296	0.206603	0.386845	0.0926495	0.444837	0.208277	0.835012	0.906873	-0.194011	0.445175	-0.435807	0.662976	1	-0.191171
Angpt4	ENSRNOG00000005008	angiopoietin 4 [Source:RGD Symbol;Acc:1307539]	29.7328	0.217996	0.398355	0.547241	0.584213	0.836606	0.327367	0.399126	-0.820211	0.412096	0.664934	-0.118841	0.397659	0.298852	0.765053	0.922738	0.664205	0.398431	1.66705	0.0955039	0.537335	0.126681	0.399552	0.317056	0.751201	0.862763	-0.0261421	0.399495	-0.0654378	0.947825	0.97082	-0.64532	0.399	-1.61735	0.105804	0.242158	-0.31807	0.398789	-0.79759	0.425108	0.603493	-0.0739317	0.399927	-0.184863	0.853337	1	-0.174545
Angptl1	ENSRNOG00000004712	angiopoietin-like 1 [Source:RGD Symbol;Acc:1598128]	19.6448	0.136083	0.431175	0.31561	0.752298	0.918587	0.190905	0.43191	-0.442003	0.658487	0.843246	0.441789	0.431398	-1.02409	0.305794	0.608241	-0.114801	0.432133	-0.265661	0.7905	0.971412	0.295227	0.432118	0.683209	0.494475	0.673145	0.471257	0.431929	1.09105	0.27525	0.442758	0.0278077	0.433209	0.06419	0.948819	0.975467	-0.0821624	0.431625	-0.190356	0.84903	0.916215	-0.417336	0.432379	-0.965209	0.33444	1	-0.366935
Angptl2	ENSRNOG00000016678	angiopoietin-like 2 [Source:RGD Symbol;Acc:620004]	43.815	0.31116	0.452731	0.687295	0.491897	0.782628	-0.154822	0.453006	0.341766	0.732527	0.88607	0.0316867	0.452168	-0.0700772	0.944132	0.995162	0.124651	0.452443	0.275506	0.782927	0.970933	-1.27513	0.453885	-2.80937	0.00496378	0.0212172	-1.24442	0.45454	-2.73776	0.00618587	0.0230135	-1.02923	0.453782	-2.26813	0.0233215	0.0776174	-1.06946	0.453506	-2.3582	0.018364	0.0583933	0.486126	0.455304	1.06769	0.285658	1	0.124112
Angptl4	ENSRNOG00000007545	angiopoietin-like 4 [Source:RGD Symbol;Acc:735058]	72.3981	0.531444	0.459691	1.15609	0.247644	0.586524	-0.727654	0.459636	1.58311	0.113397	0.318101	-0.349686	0.459453	0.761093	0.446601	0.733869	0.153477	0.459397	0.334083	0.738317	0.957482	-0.737387	0.459667	-1.60417	0.108676	0.242754	0.146245	0.459894	0.317998	0.750486	0.851495	-0.388637	0.459604	-0.845591	0.397781	0.593089	-0.479096	0.459728	-1.04213	0.297351	0.476536	-0.0938976	0.45993	-0.204156	0.838231	1	-0.155979
Angptl6	ENSRNOG00000020603	angiopoietin-like 6 [Source:RGD Symbol;Acc:1311141]	50.5231	-0.0925808	0.454132	-0.203863	0.83846	0.953591	-0.520894	0.453764	1.14794	0.250993	0.508391	-0.584521	0.453775	1.28813	0.197701	0.487768	-0.0289542	0.453406	-0.0638593	0.949082	0.998016	-0.211719	0.453729	-0.46662	0.640772	0.788909	0.454347	0.454199	1.00033	0.317152	0.488	-0.154848	0.453878	-0.341167	0.732978	0.854311	0.447092	0.454125	0.984512	0.324864	0.505799	-0.0998365	0.454192	-0.219811	0.826018	1	-0.145172
Ank1	ENSRNOG00000018241	ankyrin 1, erythrocytic [Source:RGD Symbol;Acc:1309620]	183.134	0.191869	0.418226	0.458769	0.6464	0.871298	0.337388	0.417403	-0.808305	0.418915	0.670807	0.507828	0.41805	-1.21475	0.22446	0.51772	0.0214298	0.417226	0.0513626	0.959037	0.999577	-0.0136465	0.416781	-0.0327426	0.97388	0.986207	0.0478456	0.417073	0.114717	0.908669	0.948605	-0.207876	0.416424	-0.499193	0.617643	0.773287	-0.18145	0.417849	-0.434248	0.664108	0.798822	-0.0374264	0.416694	-0.0898176	0.928432	1	-0.39888
Ank3	ENSRNOG00000053288	ankyrin 3, node of Ranvier (ankyrin G) [Source:RGD Symbol;Acc:620157]	3638.19	0.0758183	0.210608	0.359997	0.718849	0.903514	-0.507806	0.210728	2.40977	0.0159624	0.0904952	-0.573365	0.210818	2.71972	0.00653365	0.0609343	0.141378	0.210937	0.670238	0.502706	0.872651	2.06387	0.211836	9.74279	1.9805e-22	1.97085e-20	2.61978	0.211545	12.3841	3.18781e-35	9.35699e-33	1.96181	0.211776	9.2636	1.97662e-20	1.60242e-18	2.4356	0.211565	11.5123	1.14404e-30	1.56708e-28	-0.108365	0.212497	-0.509957	0.610082	1	-0.0481058
Ankef1	ENSRNOG00000005792	ankyrin repeat and EF-hand domain containing 1 [Source:RGD Symbol;Acc:1304809]	4.3874	0.170972	0.239521	0.713809	0.475346	NA	-0.377516	0.239122	1.57876	0.114392	NA	-0.190711	0.238597	0.799301	0.424116	0.717106	-0.0158329	0.238197	-0.0664699	0.947004	NA	-0.204219	0.239202	-0.853753	0.393242	NA	0.35652	0.240377	1.48317	0.138029	NA	-0.1265	0.239576	-0.528015	0.597489	NA	0.0915092	0.239627	0.381881	0.70255	NA	-0.0940386	0.240483	-0.391041	0.695767	1	-0.183223
Ankfy1	ENSRNOG00000016212	ankyrin repeat and FYVE domain containing 1 [Source:RGD Symbol;Acc:1309598]	626.81	0.206391	0.270142	0.764009	0.444862	0.748754	-0.300712	0.270255	1.1127	0.265838	0.524402	-0.167943	0.270803	0.620165	0.535149	0.793832	0.0736217	0.270916	0.271751	0.785813	0.970939	0.328159	0.270714	1.2122	0.225437	0.407336	1.02852	0.27034	3.80455	0.00014206	0.000848508	0.315433	0.27057	1.16581	0.243692	0.432457	0.342768	0.270369	1.26778	0.204877	0.370776	-0.479364	0.270568	-1.7717	0.0764446	1	-0.399653
Ankh	ENSRNOG00000010960	ANKH inorganic pyrophosphate transport regulator [Source:RGD Symbol;Acc:619925]	1434.81	-0.526694	0.240587	-2.1892	0.0285822	0.214029	1.18824	0.239243	-4.96664	6.81233e-07	3.90625e-05	0.874113	0.238214	-3.66945	0.000243075	0.00577516	-0.212572	0.236855	-0.897478	0.369464	0.80012	-0.980993	0.235851	-4.15938	3.19111e-05	0.000264265	-2.03912	0.237765	-8.5762	9.8055e-18	4.37979e-16	-0.893511	0.235246	-3.79819	0.000145755	0.00106951	-1.60909	0.237175	-6.78438	1.16583e-11	2.49521e-10	-0.0966587	0.234308	-0.412528	0.679952	1	-0.130106
Ankhd1	ENSRNOG00000030247	ankyrin repeat and KH domain containing 1 [Source:RGD Symbol;Acc:4892133]	751.915	-0.086161	0.236589	-0.364181	0.715723	0.902068	0.0074638	0.236697	-0.0315332	0.974844	0.996569	-0.154157	0.236974	0.650526	0.515353	0.782807	0.0754601	0.237081	0.318288	0.750267	0.960076	0.22761	0.236684	0.961661	0.33622	0.528696	0.334693	0.236163	1.41722	0.15642	0.29594	0.102263	0.236368	0.432645	0.665273	0.809134	0.355074	0.23649	1.50143	0.133244	0.273596	-0.0657805	0.236064	-0.278656	0.780509	1	-0.114547
Ankib1	ENSRNOG00000005502	ankyrin repeat and IBR domain containing 1 [Source:RGD Symbol;Acc:1597088]	1093.69	0.303968	0.189169	1.60686	0.108086	0.406562	0.0920693	0.188624	-0.48811	0.625472	0.823625	-0.0102813	0.189737	0.0541872	0.956786	0.998709	0.406318	0.189194	2.14763	0.0317429	0.349086	1.26571	0.189934	6.66393	2.66599e-11	6.44601e-10	1.06483	0.189279	5.62568	1.84779e-08	2.49503e-07	0.82545	0.190026	4.34389	1.39984e-05	0.000132169	0.796647	0.190156	4.18944	2.79641e-05	0.0002157	0.0357896	0.190265	0.188104	0.850795	1	0.108815
Ankle2	ENSRNOG00000060144	ankyrin repeat and LEM domain containing 2 [Source:RGD Symbol;Acc:1310191]	198.097	0.477398	0.384391	1.24196	0.214252	0.552067	-0.378583	0.38409	0.985661	0.3243	0.586445	0.132688	0.38537	-0.344314	0.73061	0.907093	-0.033873	0.38507	-0.087966	0.929904	0.996337	-0.431436	0.38368	-1.12447	0.260815	0.44819	-0.0342925	0.38215	-0.0897358	0.928497	0.959936	-0.497135	0.383037	-1.29788	0.194329	0.369873	-0.402063	0.384008	-1.04702	0.295092	0.474549	0.109627	0.381763	0.28716	0.77399	1	-0.0185613
Ankmy2	ENSRNOG00000005623	ankyrin repeat and MYND domain containing 2 [Source:RGD Symbol;Acc:1306017]	1743.11	-0.236766	0.212249	-1.11551	0.264632	0.603263	-0.686596	0.213246	3.21974	0.00128308	0.0149042	-0.525289	0.212655	2.47014	0.0135059	0.0977224	-0.398072	0.21365	-1.8632	0.0624344	0.460795	-0.586846	0.213153	-2.75317	0.00590217	0.0245041	0.0963934	0.211997	0.454692	0.649331	0.779049	-0.172362	0.212438	-0.811351	0.417164	0.610985	0.265912	0.21204	1.25407	0.209818	0.376896	-0.0672469	0.211788	-0.31752	0.750849	1	0.00335602
Ankra2	ENSRNOG00000048118	ankyrin repeat, family A (RFXANK-like), 2 [Source:RGD Symbol;Acc:1303108]	10.9142	0.354459	0.454025	0.780704	0.434977	NA	0.312637	0.455819	-0.68588	0.492789	0.728511	0.378947	0.453715	-0.835209	0.4036	0.701593	0.288149	0.455513	0.632581	0.527007	0.883222	0.697742	0.455494	1.53184	0.125563	NA	0.26655	0.455987	0.584556	0.558847	0.709303	0.450132	0.455315	0.988617	0.322851	NA	-0.27968	0.454473	-0.615394	0.538294	0.701935	-0.191771	0.456427	-0.420156	0.674371	1	0.118555
Ankrd1	ENSRNOG00000018598	ankyrin repeat domain 1 [Source:RGD Symbol;Acc:61989]	8.689	-0.230331	0.336015	-0.685479	0.493042	NA	-0.29709	0.334648	0.88777	0.374664	0.632462	-0.667722	0.334418	1.99667	0.0458611	0.210478	0.1403	0.333047	0.421263	0.673563	NA	-0.210082	0.334938	-0.627228	0.53051	NA	0.29302	0.336372	0.871119	0.383689	NA	-0.0424271	0.334487	-0.126842	0.899065	NA	0.557237	0.336037	1.65826	0.0972646	NA	0.0338857	0.336394	0.100732	0.919763	1	-0.206012
Ankrd10	ENSRNOG00000013618	ankyrin repeat domain 10 [Source:RGD Symbol;Acc:1310501]	435.128	-0.557877	0.37772	-1.47696	0.139686	0.457766	0.670702	0.37757	-1.77636	0.075673	0.248662	-0.320334	0.37763	0.848277	0.396284	0.694344	0.433159	0.377479	1.1475	0.251174	0.710707	-0.296373	0.376409	-0.78737	0.431065	0.618574	-0.989055	0.376775	-2.62506	0.00866349	0.0305066	-0.619916	0.376783	-1.64529	0.0999103	0.232012	-0.534804	0.376424	-1.42075	0.155389	0.305817	-0.103626	0.375474	-0.275988	0.782557	1	0.0219799
Ankrd12	ENSRNOG00000012733	ankyrin repeat domain 12 [Source:RGD Symbol;Acc:1310118]	3817.16	0.0676212	0.19518	0.346456	0.729	0.908214	0.0480618	0.195137	-0.246298	0.805452	0.924504	0.206225	0.195188	-1.05654	0.290721	0.592791	-0.0905416	0.195146	-0.463969	0.64267	0.930792	1.72778	0.195774	8.82535	1.09121e-18	6.63597e-17	1.62083	0.195574	8.28756	1.15597e-16	4.5767e-15	1.55455	0.195484	7.95232	1.83057e-15	7.82485e-14	1.62602	0.195753	8.30645	9.86053e-17	3.49312e-15	0.0728087	0.196146	0.371196	0.710491	1	0.0588869
Ankrd13a	ENSRNOG00000001204	ankyrin repeat domain 13a [Source:RGD Symbol;Acc:1308577]	1126.19	-0.304996	0.257707	-1.1835	0.236612	0.577039	0.951962	0.25702	-3.70384	0.000212357	0.0038286	-0.0678224	0.257625	0.26326	0.792351	0.933296	0.714789	0.256938	2.78195	0.00540338	0.15863	0.20171	0.256108	0.787598	0.430932	0.61853	-0.488763	0.256861	-1.90283	0.0570629	0.139439	-0.429813	0.256682	-1.67449	0.0940334	0.221871	-0.0453196	0.257008	-0.176336	0.86003	0.923362	0.138447	0.25616	0.540473	0.588871	1	-0.261489
Ankrd13c	ENSRNOG00000011340	ankyrin repeat domain 13C [Source:RGD Symbol;Acc:1595074]	674.488	0.0902373	0.196434	0.459378	0.645963	0.870904	0.192007	0.195656	-0.981347	0.326422	0.5887	0.0554176	0.196915	-0.281428	0.778382	0.927755	0.226826	0.19614	1.15645	0.247496	0.7053	0.364455	0.195537	1.86386	0.0623407	0.160944	0.18724	0.195033	0.960044	0.337033	0.509165	0.0466782	0.195384	0.238905	0.811179	0.898681	0.0615135	0.196057	0.313752	0.753709	0.859226	-0.0354895	0.194654	-0.182321	0.855331	1	-0.0147919
Ankrd13d	ENSRNOG00000028247	ankyrin repeat domain 13 family, member D [Source:RGD Symbol;Acc:1309156]	1652.27	-0.347819	0.197049	-1.76514	0.0775403	0.342771	0.310288	0.197073	-1.57448	0.115376	0.321013	0.215689	0.196632	-1.09692	0.272678	0.573683	-0.25322	0.196656	-1.28763	0.197875	0.657052	-0.0706884	0.196468	-0.359797	0.718999	0.84274	-0.360426	0.196385	-1.8353	0.0664612	0.15672	0.141682	0.195947	0.723064	0.469641	0.659179	0.049042	0.196423	0.249675	0.802838	0.889859	0.0616491	0.195757	0.314927	0.752817	1	-0.0205497
Ankrd16	ENSRNOG00000028168	ankyrin repeat domain 16 [Source:RGD Symbol;Acc:1311405]	168.949	0.11172	0.36244	0.308244	0.757897	0.920036	-0.25389	0.36285	0.699711	0.484108	0.721878	-0.531238	0.364991	1.45548	0.145536	0.413697	0.389067	0.365397	1.06478	0.286976	0.740754	-0.134062	0.362601	-0.369722	0.711589	0.838587	-0.146884	0.360202	-0.407783	0.683433	0.80318	-0.714541	0.362966	-1.96862	0.0489967	0.137201	-0.0317427	0.361877	-0.0877169	0.930102	0.96323	0.226862	0.359634	0.630812	0.528164	1	0.266713
Ankrd17	ENSRNOG00000002940	ankyrin repeat domain 17 [Source:RGD Symbol;Acc:1562348]	3674.47	0.174538	0.182664	0.955516	0.339317	0.668365	-0.2877	0.182709	1.57464	0.115341	0.320996	-0.0285117	0.182801	0.155971	0.876056	0.971527	-0.0846494	0.182846	-0.462955	0.643396	0.93118	0.852646	0.183115	4.65634	3.21887e-06	3.3269e-05	0.937622	0.182698	5.13209	2.86547e-07	3.14634e-06	0.873342	0.182922	4.7744	1.80247e-06	2.07523e-05	0.728219	0.182886	3.98183	6.83879e-05	0.000481102	-0.0348643	0.18292	-0.190599	0.84884	1	0.202723
Ankrd2	ENSRNOG00000013840	ankyrin repeat domain 2 (stretch responsive muscle) [Source:RGD Symbol;Acc:1305104]	0.108359	0	0.0998606	0	1	NA	0	0.0998606	0	1	NA	0	0.0998606	0	1	NA	0	0.0998606	0	1	NA	-0.0450849	0.0998606	-0.451479	0.651644	NA	0	0.0998606	0	1	NA	0	0.0998606	0	1	NA	0	0.0998606	0	1	NA	0	0.0998606	0	1	1	-0.0530799
Ankrd22	ENSRNOG00000019190	ankyrin repeat domain 22 [Source:RGD Symbol;Acc:1307862]	0.463001	0	0.0998942	0	1	NA	0	0.0998942	0	1	NA	0	0.0998606	0	1	NA	0	0.0998606	0	1	NA	0	0.0999615	0	1	NA	0	0.100121	0	1	NA	0	0.100059	0	1	NA	-0.0878425	0.100137	-0.877219	0.380368	NA	-0.0932438	0.100364	-0.929052	0.352862	1	0
Ankrd23	ENSRNOG00000016151	ankyrin repeat domain 23 [Source:RGD Symbol;Acc:1310398]	4.45512	-0.036661	0.227585	-0.161087	0.872025	NA	0.159273	0.227819	-0.699119	0.484478	NA	-0.119331	0.227183	0.525263	0.599401	0.836677	0.241942	0.227417	1.06387	0.287387	NA	0.123776	0.228172	0.542468	0.587496	NA	-0.0385961	0.228556	-0.168869	0.8659	NA	-0.110294	0.228104	-0.483524	0.628724	NA	0.113852	0.227933	0.499496	0.61743	NA	0.115787	0.228903	0.505833	0.612974	1	0.00309941
Ankrd24	ENSRNOG00000006759	ankyrin repeat domain 24 [Source:RGD Symbol;Acc:1311385]	297.553	-0.0243052	0.286717	-0.0847705	0.932444	0.986926	-0.564177	0.288744	1.9539	0.0507133	0.193835	0.0827943	0.286877	-0.288605	0.772884	0.925982	-0.671276	0.288903	-2.32354	0.0201504	0.29132	-0.240505	0.288978	-0.832259	0.405263	0.593574	0.456343	0.286146	1.59479	0.110759	0.230268	0.311609	0.28579	1.09034	0.275561	0.468502	0.58572	0.287298	2.03872	0.0414781	0.112979	0.105072	0.286728	0.366452	0.714028	1	-0.132671
Ankrd27	ENSRNOG00000052814	ankyrin repeat domain 27 (VPS9 domain) [Source:RGD Symbol;Acc:1307106]	202.839	0.953907	0.423515	2.25236	0.0242996	0.195321	0.754644	0.419583	-1.79856	0.0720886	0.241476	0.620643	0.42451	-1.46202	0.143735	0.41034	1.08791	0.420597	2.58658	0.00969327	0.202618	-0.307879	0.418086	-0.736401	0.461487	0.64606	-0.944495	0.418743	-2.25555	0.024099	0.0703345	-1.63423	0.419553	-3.89518	9.81258e-05	0.000749979	-1.92658	0.422033	-4.56501	4.99481e-06	4.51106e-05	-0.0281786	0.417228	-0.0675377	0.946154	1	-0.118028
Ankrd29	ENSRNOG00000011856	ankyrin repeat domain 29 [Source:RGD Symbol;Acc:1587260]	250.291	0.406616	0.439175	0.925864	0.354517	0.681761	-0.0609277	0.438966	0.138798	0.88961	0.9614	-0.286544	0.439641	0.65177	0.51455	0.782455	0.632233	0.439433	1.43875	0.150222	0.612377	0.172013	0.438968	0.391858	0.695163	0.827611	0.272576	0.438764	0.621236	0.534444	0.689187	-0.429435	0.439241	-0.977676	0.328235	0.524381	-0.101753	0.439162	-0.231699	0.816772	0.897031	0.0322867	0.438751	0.0735878	0.941338	1	-0.0396358
Ankrd32	NA	NA	369.293	-0.995834	0.278897	-3.57061	0.000356148	0.0181616	0.352214	0.280032	-1.25776	0.208478	0.457178	-1.08002	0.279543	3.86352	0.000111766	0.00313555	0.436398	0.280675	1.55482	0.119989	0.579548	0.523857	0.279904	1.87156	0.0612676	0.158821	0.414399	0.280248	1.47869	0.139224	0.272265	0.292919	0.280882	1.04285	0.297016	0.491506	1.26161	0.278737	4.52616	6.00654e-06	5.35808e-05	-0.148626	0.280089	-0.53064	0.595668	1	-0.242756
Ankrd33b	ENSRNOG00000010888	ankyrin repeat domain 33B [Source:RGD Symbol;Acc:1564227]	1254.13	-0.0359255	0.213509	-0.168262	0.866377	0.965173	0.54634	0.212767	-2.56779	0.010235	0.0671265	0.357721	0.213226	-1.67766	0.0934126	0.32066	0.152693	0.212482	0.718617	0.472377	0.858102	0.171075	0.212082	0.806646	0.41987	0.60818	0.0480764	0.212678	0.226053	0.821161	0.89531	-0.13776	0.211888	-0.650153	0.515593	0.697204	0.0278167	0.213085	0.130543	0.896137	0.944803	-0.0561853	0.212252	-0.26471	0.791233	1	-0.423341
Ankrd34a	ENSRNOG00000033741	ankyrin repeat domain 34A [Source:RGD Symbol;Acc:1308412]	1372.8	-0.0177929	0.211084	-0.0842928	0.932824	0.986926	-0.238085	0.211414	1.12615	0.260101	0.517774	-0.0212988	0.211277	0.10081	0.919701	0.988463	-0.234579	0.211607	-1.10856	0.267621	0.723356	-0.196047	0.211233	-0.928112	0.353349	0.544913	-0.0253288	0.210376	-0.120398	0.904168	0.945543	-0.00396914	0.210617	-0.0188453	0.984965	0.99191	-0.152595	0.210639	-0.72444	0.468795	0.642931	-0.145059	0.209929	-0.690993	0.48957	1	0.0673664
Ankrd34b	ENSRNOG00000040166	ankyrin repeat domain 34B [Source:RGD Symbol;Acc:1594383]	495.569	-0.135646	0.325512	-0.416716	0.676886	0.884142	-0.803392	0.326775	2.45855	0.0139501	0.0825039	-1.36153	0.327539	4.15685	3.2267e-05	0.00120311	0.422493	0.328793	1.28498	0.198799	0.657974	0.567136	0.328269	1.72765	0.0840501	0.201122	0.416007	0.325381	1.27852	0.201065	0.355982	-0.308111	0.327987	-0.939402	0.347524	0.544179	0.595296	0.325623	1.82818	0.0675228	0.164543	0.043643	0.325492	0.134083	0.893337	1	0.954521
Ankrd34c	ENSRNOG00000013937	ankyrin repeat domain 34C [Source:RGD Symbol;Acc:1305403]	29.9862	0.0957445	0.443583	0.215843	0.82911	0.949881	-0.0948205	0.44361	0.213747	0.830744	0.936519	-0.147207	0.443057	0.332252	0.739699	0.912998	0.148131	0.443084	0.334318	0.73814	0.957482	-0.414007	0.444104	-0.932229	0.351218	0.543058	0.142919	0.444337	0.321645	0.747722	0.849772	-0.592092	0.444174	-1.33302	0.182526	0.354176	-0.000516814	0.443825	-0.00116445	0.999071	1	-0.0476909	0.444578	-0.107272	0.914573	1	-0.462105
Ankrd37	ENSRNOG00000031335	ankyrin repeat domain 37 [Source:RGD Symbol;Acc:1565715]	208.093	-0.243063	0.364915	-0.66608	0.50536	0.790984	-0.204133	0.365957	0.557807	0.576976	0.790794	0.503135	0.363961	-1.38239	0.166853	0.445295	-0.950331	0.365007	-2.6036	0.00922504	0.198475	-0.068105	0.365778	-0.186192	0.852294	0.923549	0.0493252	0.364181	0.135441	0.892263	0.938071	0.909326	0.363476	2.50175	0.012358	0.0466952	0.390911	0.36456	1.07228	0.283594	0.46293	0.0985226	0.363824	0.270797	0.786547	1	0.0867032
Ankrd39	ENSRNOG00000023995	ankyrin repeat domain 39 [Source:RGD Symbol;Acc:1559504]	95.4172	0.143252	0.440991	0.324841	0.745301	0.915413	1.02483	0.439549	-2.33155	0.0197243	0.105388	0.523288	0.44074	-1.18729	0.235112	0.530821	0.644796	0.439296	1.4678	0.14216	0.605998	1.2066	0.439489	2.74546	0.00604267	0.0249862	0.117824	0.44	0.267782	0.788867	0.877088	0.387566	0.439665	0.881505	0.378045	0.573927	0.420354	0.441304	0.952528	0.340829	0.522995	0.445783	0.440315	1.01242	0.311338	1	0.0639428
Ankrd40	ENSRNOG00000002935	ankyrin repeat domain 40 [Source:RGD Symbol;Acc:1594678]	1378.06	0.572906	0.215643	2.65673	0.00789025	0.105446	0.0525303	0.214725	-0.244639	0.806736	0.925006	0.184554	0.216295	-0.853253	0.393519	0.692551	0.440882	0.215379	2.047	0.0406578	0.384084	-0.0521236	0.214439	-0.24307	0.807951	0.898877	0.158742	0.214275	0.740831	0.458796	0.623873	-0.416804	0.214811	-1.94033	0.0523392	0.143985	-0.491538	0.215419	-2.28178	0.0225025	0.0692833	-0.0773741	0.21405	-0.361477	0.717743	1	-0.263396
Ankrd42	ENSRNOG00000009664	ankyrin repeat domain 42 [Source:RGD Symbol;Acc:1310789]	384.132	0.369453	0.290761	1.27064	0.203857	0.542386	-0.350082	0.290636	1.20454	0.228381	0.481295	0.242094	0.291478	-0.830573	0.406215	0.70405	-0.222724	0.291354	-0.764444	0.444603	0.846779	-0.453061	0.289992	-1.56232	0.118213	0.258143	-0.378044	0.287576	-1.31459	0.188648	0.339959	-0.442164	0.288434	-1.53298	0.125281	0.272617	-0.410091	0.290039	-1.41392	0.157386	0.308753	0.337405	0.286845	1.17626	0.23949	1	0.275065
Ankrd44	ENSRNOG00000021384	ankyrin repeat domain 44 [Source:RGD Symbol;Acc:1561893]	166.435	0.150927	0.401681	0.375737	0.707113	0.899779	0.137749	0.401187	-0.343353	0.731333	0.885308	0.168242	0.401894	-0.418624	0.675491	0.88152	0.120433	0.4014	0.300032	0.764153	0.964422	0.517686	0.401395	1.28972	0.197148	0.371613	0.598149	0.401282	1.4906	0.136067	0.267615	0.44633	0.401298	1.11222	0.266045	0.457752	0.430137	0.402027	1.06992	0.284655	0.463938	-0.0170861	0.401628	-0.0425421	0.966067	1	-0.218212
Ankrd46	ENSRNOG00000025504	ankyrin repeat domain 46 [Source:RGD Symbol;Acc:1309382]	4065.44	-0.285562	0.18412	-1.55096	0.120912	0.426701	-0.271336	0.184688	1.46916	0.14179	0.364813	-0.490798	0.184486	2.66035	0.00780595	0.0689757	-0.0661004	0.185053	-0.357196	0.720945	0.953967	-1.73454	0.183839	-9.4351	3.90605e-21	3.31216e-19	-1.47176	0.183201	-8.03357	9.46733e-16	3.32516e-14	-1.5903	0.183599	-8.66176	4.6452e-18	2.82924e-16	-1.29114	0.183213	-7.04722	1.82531e-12	4.3441e-11	-0.104944	0.18229	-0.5757	0.564818	1	0.00855727
Ankrd49	ENSRNOG00000009233	ankyrin repeat domain 49 [Source:RGD Symbol;Acc:1311759]	527.682	0.147673	0.288156	0.512476	0.608318	0.850613	-0.18639	0.288203	0.646732	0.517806	0.747916	0.231507	0.288302	-0.803001	0.421974	0.715868	-0.270223	0.288349	-0.937142	0.348686	0.78301	-0.211422	0.287828	-0.73454	0.46262	0.647119	-0.222108	0.286487	-0.775283	0.438173	0.605586	0.0670631	0.286913	0.23374	0.815187	0.901298	-0.148224	0.287671	-0.515256	0.606374	0.757087	0.221557	0.285999	0.774678	0.43853	1	0.197076
Ankrd50	ENSRNOG00000010534	ankyrin repeat domain 50 [Source:RGD Symbol;Acc:1311665]	109.368	1.6292	0.410074	3.97294	7.09914e-05	0.00619426	-0.584136	0.405843	1.43932	0.150061	0.378121	0.972965	0.411824	-2.36258	0.0181484	0.117441	0.0720977	0.407624	0.176873	0.859608	0.9846	0.106769	0.406722	0.26251	0.792928	0.889751	0.713922	0.404517	1.76488	0.0775846	0.176992	0.00971653	0.40628	0.0239159	0.98092	0.990041	-1.22642	0.410182	-2.98995	0.00279025	0.0123159	-0.311144	0.404627	-0.768966	0.441914	1	-0.0230175
Ankrd52	ENSRNOG00000030597	ankyrin repeat domain 52 [Source:RGD Symbol;Acc:1307124]	218.565	1.64698	0.363444	4.53159	5.85425e-06	0.00125167	-0.164855	0.358551	0.459783	0.645672	0.836001	0.661821	0.365862	-1.80894	0.0704608	0.272896	0.820302	0.361013	2.27223	0.0230729	0.307173	0.476919	0.359224	1.32764	0.184298	0.355744	0.526941	0.358007	1.47187	0.141055	0.274626	-0.435202	0.360565	-1.207	0.227433	0.413019	-1.44384	0.363266	-3.9746	7.04969e-05	0.000494361	-0.323799	0.357825	-0.904908	0.365514	1	0.114834
Ankrd54	ENSRNOG00000010821	ankyrin repeat domain 54 [Source:RGD Symbol;Acc:1309552]	515.798	-0.134346	0.308036	-0.436139	0.662736	0.879184	-0.900283	0.310147	2.90276	0.00369888	0.0327908	-0.854867	0.309598	2.76121	0.00575869	0.0558757	-0.179763	0.311697	-0.576723	0.564126	0.898405	-0.885035	0.309895	-2.85592	0.00429125	0.0189063	0.0800134	0.307447	0.260251	0.79467	0.880681	-0.585984	0.309108	-1.89573	0.0579964	0.15565	0.0887235	0.307605	0.288433	0.773015	0.870613	-0.125636	0.307015	-0.409219	0.682379	1	-0.0647646
Ankrd55	ENSRNOG00000013555	ankyrin repeat domain 55 [Source:RGD Symbol;Acc:1307735]	105.268	-0.923319	0.458759	-2.01264	0.044152	0.266617	0.286025	0.458918	-0.62326	0.533114	0.758884	-0.81064	0.458777	1.76696	0.0772352	0.287729	0.173347	0.458936	0.377714	0.705643	0.950209	0.113358	0.458809	0.24707	0.804854	0.896793	-0.703579	0.458672	-1.53395	0.125042	0.252171	-0.216086	0.458764	-0.471018	0.637628	0.788566	0.372305	0.458548	0.811921	0.416837	0.596006	0.152565	0.45846	0.332777	0.739303	1	0.530912
Ankrd6	ENSRNOG00000007110	ankyrin repeat domain 6 [Source:RGD Symbol;Acc:1583731]	1306.02	-0.252956	0.192498	-1.31407	0.188824	0.521833	-0.938184	0.194453	4.82472	1.40198e-06	7.16033e-05	-0.798402	0.193461	4.12694	3.6762e-05	0.00132848	-0.392737	0.195406	-2.00985	0.0444467	0.397103	-0.070646	0.195277	-0.361773	0.717522	0.841825	0.0997327	0.19217	0.518981	0.603774	0.743218	-0.131965	0.193472	-0.682085	0.495185	0.680648	0.229813	0.192166	1.19591	0.231732	0.40413	-0.122876	0.191837	-0.640521	0.521834	1	0.767805
Ankrd61	ENSRNOG00000001048	ankyrin repeat domain 61 [Source:RGD Symbol;Acc:1586393]	7.77157	0	0.308414	0	1	NA	0	0.308466	0	1	1	0.493805	0.309132	-1.59739	0.110179	0.35385	-0.493995	0.309184	-1.59774	0.110101	NA	-0.210695	0.309408	-0.68096	0.495897	NA	-0.144618	0.310344	-0.465995	0.641219	NA	0.163629	0.311316	0.525603	0.599164	NA	-0.278984	0.309664	-0.900925	0.367628	NA	-0.137546	0.311589	-0.441433	0.6589	1	-0.0690662
Ankrd65	ENSRNOG00000043331	ankyrin repeat domain 65 [Source:RGD Symbol;Acc:1588232]	0.781383	-0.0624582	0.100484	-0.621574	0.534222	NA	0	0.100445	0	1	NA	-0.0623633	0.100351	0.621449	0.534304	NA	0	0.100312	0	1	NA	-0.0211886	0.100613	-0.210594	0.833204	NA	0	0.100927	0	1	NA	0	0.100775	0	1	NA	0.0626168	0.100705	0.621786	0.534083	NA	0	0.101147	0	1	1	-0.0215346
Ankrd7	ENSRNOG00000055481	ankyrin repeat domain 7 [Source:RGD Symbol;Acc:1564660]	0.796964	0	0.100466	0	1	NA	0	0.100481	0	1	NA	0	0.100335	0	1	NA	0	0.100351	0	1	NA	0	0.100634	0	1	NA	-0.0295585	0.100973	-0.292736	0.769724	NA	-0.110421	0.100868	-1.0947	0.273649	NA	0	0.100684	0	1	NA	0.0297148	0.10119	0.293653	0.769023	1	0.0296682
Ankrd9	ENSRNOG00000008056	ankyrin repeat domain 9 [Source:RGD Symbol;Acc:1307662]	417.43	0.322799	0.270165	1.19482	0.232156	0.570611	0.175677	0.268698	-0.653808	0.513236	0.743337	0.420109	0.270332	-1.55405	0.120173	0.37081	0.0783674	0.268866	0.291473	0.770689	0.966889	0.063599	0.268032	0.237282	0.812438	0.900955	0.376113	0.268422	1.4012	0.161154	0.302597	-0.0835908	0.267621	-0.312347	0.754777	0.865857	-0.039746	0.27005	-0.14718	0.88299	0.93792	-0.0930597	0.268306	-0.346842	0.72871	1	-0.488191
Anks1a	ENSRNOG00000000498	ankyrin repeat and sterile alpha motif domain containing 1A [Source:RGD Symbol;Acc:1309183]	562.459	0.186617	0.274541	0.679742	0.496668	0.7859	-0.157505	0.274486	0.573817	0.566091	0.781778	-0.450788	0.275446	1.63657	0.10172	0.337801	0.4799	0.275392	1.74261	0.0814021	0.505372	1.81461	0.277285	6.5442	5.98154e-11	1.38241e-09	2.15456	0.276949	7.77963	7.27398e-15	2.28759e-13	1.56421	0.278078	5.62506	1.85448e-08	2.96995e-07	2.10842	0.277966	7.58517	3.32041e-14	9.45359e-13	0.14048	0.280341	0.501103	0.616299	1	-0.182447
Anks1b	ENSRNOG00000024870	ankyrin repeat and sterile alpha motif domain containing 1B [Source:RGD Symbol;Acc:1565556]	3895.71	-0.118974	0.127471	-0.933346	0.350641	0.677794	0.00799603	0.127544	-0.0626924	0.950011	0.986588	-0.183606	0.12764	1.43847	0.150302	0.421103	0.072628	0.127713	0.56868	0.569574	0.90013	0.298699	0.127585	2.34116	0.0192237	0.064495	0.0452791	0.127136	0.356147	0.721731	0.832132	0.154001	0.127424	1.20857	0.226827	0.412301	0.205766	0.127319	1.61615	0.106061	0.231011	0.0415129	0.126984	0.326916	0.743732	1	0.245423
Anks3	ENSRNOG00000003186	ankyrin repeat and sterile alpha motif domain containing 3 [Source:RGD Symbol;Acc:1305833]	891.276	0.172119	0.31696	0.543031	0.587109	0.837598	-0.00538311	0.316776	0.0169934	0.986442	1	-0.199069	0.317457	0.627073	0.530611	0.791835	0.365805	0.317274	1.15296	0.248926	0.707577	0.335932	0.316865	1.06017	0.289065	0.478766	-0.350721	0.316086	-1.10957	0.267183	0.433971	-0.267692	0.316852	-0.844847	0.398196	0.593407	-0.341383	0.316636	-1.07816	0.280964	0.459624	0.181457	0.315761	0.574665	0.565518	1	0.692036
Anks4b	ENSRNOG00000046181	ankyrin repeat and sterile alpha motif domain containing 4B [Source:RGD Symbol;Acc:1584204]	12.4131	-0.116256	0.302815	-0.383919	0.701039	NA	-0.0604485	0.302553	0.199795	0.841641	0.94075	-0.177457	0.302471	0.586692	0.557411	0.808931	0	0.30221	0	1	1	-0.401504	0.3032	-1.32422	0.185429	NA	-0.131078	0.303691	-0.431616	0.66602	0.79064	-0.0695638	0.303187	-0.229441	0.818526	NA	-0.158159	0.303499	-0.521119	0.602284	0.754339	-0.143337	0.304374	-0.470925	0.637694	1	-0.209978
Anks6	ENSRNOG00000023309	ankyrin repeat and sterile alpha motif domain containing 6 [Source:RGD Symbol;Acc:3334]	133.141	0.199447	0.440547	0.452726	0.650746	0.872995	0.0630742	0.440242	-0.143272	0.886076	0.959719	0.740175	0.440266	-1.6812	0.0927245	0.319338	-0.477653	0.439961	-1.08567	0.277624	0.733878	-0.194197	0.439885	-0.441472	0.658871	0.801765	0.539397	0.440174	1.22542	0.220418	0.379476	0.384465	0.439377	0.875023	0.381561	0.577475	-0.392124	0.440163	-0.890861	0.373004	0.555213	-0.732074	0.43979	-1.6646	0.0959923	1	-0.796668
Ankzf1	ENSRNOG00000019052	ankyrin repeat and zinc finger domain containing 1 [Source:RGD Symbol;Acc:1359242]	420.744	0.0667624	0.314411	0.212341	0.831841	0.950894	-0.158446	0.314564	0.503701	0.614472	0.815181	-0.331883	0.315491	1.05196	0.29282	0.595471	0.240199	0.315644	0.760981	0.446669	0.847246	-0.177865	0.314209	-0.566072	0.571345	0.73531	0.119721	0.313364	0.382051	0.702424	0.817668	-0.478357	0.314244	-1.52225	0.127947	0.276576	-0.160521	0.313829	-0.511491	0.609008	0.758813	-0.213479	0.31278	-0.682521	0.494909	1	-0.13914
Ano1	ENSRNOG00000020865	anoctamin 1, calcium activated chloride channel [Source:RGD Symbol;Acc:1310786]	6.18716	0.0421652	0.277639	0.15187	0.879289	NA	-0.0423046	0.277687	0.152346	0.878914	0.956629	0.0905154	0.277354	-0.326353	0.744157	0.914349	-0.0906548	0.277402	-0.326799	0.74382	NA	-0.351503	0.278692	-1.26126	0.207215	NA	-0.12996	0.279481	-0.465006	0.641927	NA	-0.183516	0.279303	-0.657048	0.51115	NA	-0.16523	0.27852	-0.593244	0.553018	NA	0.00689542	0.280359	0.024595	0.980378	1	-0.179238
Ano4	ENSRNOG00000006841	anoctamin 4 [Source:RGD Symbol;Acc:1310252]	382.162	0.68393	0.323568	2.11371	0.03454	0.236069	-0.193142	0.322496	0.598897	0.549242	0.77059	0.343802	0.32434	-1.06001	0.289141	0.591534	0.146986	0.323271	0.454683	0.649337	0.933313	0.291385	0.322849	0.902541	0.366769	0.55761	0.430671	0.321828	1.3382	0.18083	0.32919	0.0417421	0.322585	0.129399	0.897042	0.9475	0.134692	0.324286	0.415349	0.677886	0.808405	0.387951	0.32255	1.20276	0.229068	1	0.0538556
Ano6	ENSRNOG00000006995	anoctamin 6 [Source:RGD Symbol;Acc:1304765]	159.128	-1.00391	0.413378	-2.42856	0.015159	0.152082	0.296794	0.414287	-0.716398	0.473746	0.715296	-0.916207	0.41352	2.21563	0.0267168	0.151305	0.209089	0.414428	0.504523	0.613894	0.916565	0.0429672	0.413611	0.103883	0.917262	0.959148	-0.0733949	0.41365	-0.177432	0.859169	0.917757	-0.170331	0.413616	-0.411808	0.68048	0.819507	0.560949	0.412377	1.36028	0.17374	0.330484	-0.369568	0.41265	-0.895597	0.370468	1	-0.180432
Ano7	ENSRNOG00000023427	anoctamin 7 [Source:RGD Symbol;Acc:1302987]	0.247628	-0.0210179	0.0998606	-0.210473	0.833299	NA	0	0.0998606	0	1	NA	-0.0188628	0.0998606	0.188892	0.850178	NA	0	0.0998606	0	1	NA	0	0.0998606	0	1	NA	-0.0642074	0.0998606	-0.64297	0.520243	NA	0	0.0998606	0	1	NA	0.0249299	0.0998606	0.249647	0.80286	NA	0.0681194	0.0998606	0.682145	0.495147	1	0.0668017
Anp32a	ENSRNOG00000014846	acidic (leucine-rich) nuclear phosphoprotein 32 family, member A [Source:RGD Symbol;Acc:2116]	1438.26	0.48771	0.250371	1.94795	0.0514213	0.285693	-1.02037	0.250725	4.06967	4.70789e-05	0.00118374	-0.334225	0.250839	1.33243	0.18272	0.467015	-0.198434	0.251192	-0.789969	0.429546	0.837356	1.26665	0.252208	5.02223	5.10758e-07	6.33371e-06	2.30233	0.251342	9.16018	5.18115e-20	3.05613e-18	1.44386	0.251804	5.73405	9.80595e-09	1.65142e-07	1.82423	0.251748	7.24627	4.28402e-13	1.09571e-11	0.00960978	0.252712	0.0380266	0.969667	1	-0.015317
Anp32b	ENSRNOG00000009266	acidic (leucine-rich) nuclear phosphoprotein 32 family, member B [Source:RGD Symbol;Acc:621285]	2923.02	0.280484	0.171307	1.63732	0.101564	0.395516	-0.360687	0.171341	2.10509	0.0352836	0.153603	-0.141279	0.171561	0.823492	0.410228	0.707152	0.0610757	0.171594	0.355932	0.721892	0.954061	1.41022	0.17229	8.18517	2.71929e-16	1.31498e-14	1.73294	0.171832	10.0851	6.43162e-24	5.96158e-22	1.37699	0.172176	7.99761	1.26857e-15	5.48238e-14	1.48974	0.172152	8.65366	4.98738e-18	2.05583e-16	0.0372896	0.172674	0.215954	0.829024	1	0.0379718
Anp32e	ENSRNOG00000021168	acidic (leucine-rich) nuclear phosphoprotein 32 family, member E [Source:RGD Symbol;Acc:1310611]	1924.25	0.186977	0.20275	0.922207	0.356421	0.68376	-0.382125	0.202883	1.88347	0.0596362	0.215007	0.0769269	0.202904	-0.379129	0.704592	0.894803	-0.272074	0.203037	-1.34002	0.180238	0.643023	0.635908	0.203403	3.12635	0.00176992	0.00902272	1.35306	0.203147	6.66051	2.72884e-11	5.36542e-10	0.830279	0.202975	4.09055	4.30355e-05	0.000361344	1.03097	0.203351	5.06988	3.98065e-07	4.41705e-06	-0.135118	0.203747	-0.663165	0.507225	1	-0.335028
Anpep	ENSRNOG00000014610	alanyl (membrane) aminopeptidase [Source:RGD Symbol;Acc:2991]	19.311	-0.497963	0.430724	-1.15611	0.247637	0.586524	0.371606	0.430483	-0.863229	0.388011	0.642948	-0.775377	0.429453	1.8055	0.0709967	0.274312	0.649019	0.429212	1.51212	0.130503	0.591253	-0.292124	0.432086	-0.676078	0.498991	0.676792	-0.193126	0.431444	-0.447627	0.654423	0.782742	-0.750062	0.430544	-1.74212	0.0814867	0.199226	0.311709	0.43178	0.721916	0.470346	0.644167	0.00687174	0.432498	0.0158885	0.987323	1	-0.470604
Antxr1	ENSRNOG00000008678	anthrax toxin receptor 1 [Source:RGD Symbol;Acc:1307144]	63.6095	-0.496159	0.452878	-1.09557	0.273268	0.611148	0.704798	0.452996	-1.55586	0.119742	0.327879	-0.298373	0.452895	0.658814	0.510015	0.778899	0.507013	0.453013	1.1192	0.263054	0.718879	-0.229813	0.453502	-0.506751	0.612329	0.767707	-0.538515	0.4532	-1.18825	0.234735	0.396467	-0.740826	0.453324	-1.63421	0.102215	0.235827	0.0902908	0.453248	0.199208	0.8421	0.911529	0.132647	0.453569	0.292451	0.769942	1	-0.396097
Anxa1	ENSRNOG00000017469	annexin A1 [Source:RGD Symbol;Acc:2118]	225.032	0.59979	0.445715	1.34568	0.178405	0.510919	0.763207	0.444665	-1.71636	0.0860953	0.270711	1.37185	0.445399	-3.08004	0.00206971	0.0268355	-0.00884914	0.444346	-0.019915	0.984111	1	-0.659403	0.444018	-1.48508	0.137522	0.288938	-0.385695	0.444538	-0.867632	0.385596	0.558003	-0.377631	0.443992	-0.850535	0.395028	0.590632	-1.22893	0.445259	-2.76004	0.00577945	0.022698	-0.243445	0.444077	-0.548204	0.583552	1	-1.03691
Anxa10	ENSRNOG00000014339	annexin A10 [Source:RGD Symbol;Acc:1560956]	0	NA	NA	NA	NA	NA	NA	NA	NA	NA	NA	NA	NA	NA	NA	NA	NA	NA	NA	NA	NA	NA	NA	NA	NA	NA	NA	NA	NA	NA	NA	NA	NA	NA	NA	NA	NA	NA	NA	NA	NA	NA	NA	NA	NA	NA	NA
Anxa11	ENSRNOG00000010984	annexin A11 [Source:RGD Symbol;Acc:1309911]	3840.18	-0.0943613	0.154036	-0.612594	0.540145	0.812815	-0.0125913	0.154104	0.0817068	0.93488	0.980179	-0.226277	0.154249	1.46696	0.142387	0.408207	0.119325	0.154317	0.773244	0.439378	0.844109	-0.299878	0.153829	-1.94943	0.0512446	0.139003	-0.150851	0.153605	-0.98207	0.326065	0.497027	-0.477319	0.153751	-3.10449	0.00190609	0.00982295	-0.130011	0.153741	-0.84565	0.397748	0.577691	-0.0735218	0.153309	-0.479565	0.631536	1	-0.136436
Anxa13	ENSRNOG00000007980	annexin A13 [Source:RGD Symbol;Acc:1307545]	0.360698	0	0.0998606	0	1	NA	0.12358	0.0998606	-1.23753	0.215891	NA	0	0.0998606	0	1	NA	0.121425	0.0998606	1.21595	0.224005	NA	0.126175	0.0998606	1.26351	0.206407	NA	-0.0299555	0.0998606	-0.299973	0.764198	NA	0	0.0998606	0	1	NA	-0.009322	0.0998606	-0.0933502	0.925625	NA	0.0167415	0.0998606	0.167649	0.866859	1	0.0325498
Anxa2	ENSRNOG00000010362	annexin A2 [Source:RGD Symbol;Acc:621170]	728.738	0.541557	0.309767	1.74827	0.0804167	0.350325	-1.01495	0.310458	3.26921	0.00107847	0.0130705	-0.0218258	0.310452	0.0703033	0.943952	0.99512	-0.45157	0.311141	-1.45133	0.146687	0.609659	-0.789666	0.310455	-2.54358	0.0109723	0.0410049	0.583662	0.309088	1.88834	0.0589807	0.143048	-0.336693	0.309534	-1.08774	0.27671	0.469639	-0.0842161	0.309856	-0.271791	0.785783	0.878651	-0.126322	0.309178	-0.408573	0.682853	1	-0.358376
Anxa3	ENSRNOG00000002045	annexin A3 [Source:RGD Symbol;Acc:2119]	2632.84	-0.187625	0.29764	-0.630377	0.528448	0.806049	1.1656	0.297285	-3.92083	8.82447e-05	0.00193601	0.675654	0.297392	-2.27193	0.0230907	0.137025	0.302324	0.297037	1.0178	0.308774	0.75843	-0.501357	0.296808	-1.68916	0.0911885	0.213845	-0.652242	0.297248	-2.19427	0.0282159	0.0797994	-0.431111	0.296889	-1.4521	0.146475	0.304812	-0.282634	0.297361	-0.950473	0.341872	0.523943	0.181983	0.296968	0.612803	0.540007	1	-1.01472
Anxa4	ENSRNOG00000018159	annexin A4 [Source:RGD Symbol;Acc:621171]	803.349	-0.70457	0.277478	-2.53919	0.0111109	0.128565	1.09773	0.276823	-3.96544	7.32598e-05	0.00169885	0.724995	0.275465	-2.63189	0.0084911	0.0723061	-0.331839	0.274805	-1.20754	0.227223	0.684555	-0.538008	0.2743	-1.96139	0.0498339	0.135942	-0.496473	0.276727	-1.79409	0.0727989	0.168538	-0.256847	0.273645	-0.938615	0.347928	0.544521	0.183304	0.275931	0.664311	0.506491	0.674884	-0.0247928	0.275175	-0.0900984	0.928209	1	-1.13926
Anxa5	ENSRNOG00000014453	annexin A5 [Source:RGD Symbol;Acc:2120]	2001.96	-0.0593356	0.234076	-0.253489	0.799891	0.938939	0.0908047	0.234027	-0.38801	0.698009	0.865819	0.291089	0.233931	-1.24434	0.213376	0.506302	-0.25962	0.233882	-1.11005	0.266978	0.723356	-0.764276	0.233369	-3.27497	0.00105673	0.00574477	-0.523955	0.233256	-2.24626	0.0246871	0.0716605	-0.458016	0.233004	-1.9657	0.0493331	0.137877	-0.380605	0.233558	-1.6296	0.103187	0.226471	0.084014	0.232736	0.360984	0.718111	1	-0.331125
Anxa6	ENSRNOG00000010668	annexin A6 [Source:RGD Symbol;Acc:621172]	1898.87	0.361676	0.216797	1.66826	0.0952632	0.381465	-0.0150604	0.21643	0.0695859	0.944523	0.98468	0.235125	0.217034	-1.08336	0.278651	0.579724	0.111491	0.216666	0.514573	0.606851	0.913316	-0.3437	0.216098	-1.59048	0.111727	0.247572	-0.0680672	0.215906	-0.315264	0.752561	0.852571	-0.360016	0.216076	-1.66615	0.0956827	0.224591	-0.336173	0.216597	-1.55207	0.120646	0.253722	0.0935694	0.215704	0.433785	0.664444	1	-0.260572
Anxa7	ENSRNOG00000007136	annexin A7 [Source:RGD Symbol;Acc:621173]	1324.01	-0.0106596	0.193447	-0.0551038	0.956056	0.992898	-0.256	0.193812	1.32087	0.186546	0.432826	-0.136838	0.193807	0.706055	0.480154	0.757651	-0.129822	0.194172	-0.668592	0.503756	0.872651	-0.143285	0.193691	-0.739762	0.459444	0.644184	0.223246	0.192919	1.1572	0.247189	0.411446	0.116907	0.193334	0.604688	0.545386	0.721149	0.0907993	0.19319	0.470001	0.638354	0.780231	-0.143107	0.192661	-0.74279	0.457609	1	-0.110531
Anxa8	ENSRNOG00000060949	annexin A8 [Source:RGD Symbol;Acc:1307719]	18.5606	-0.00415125	0.356802	-0.0116346	0.990717	1	-0.226465	0.356391	0.63544	0.525142	0.752862	0.209232	0.356862	-0.58631	0.557667	0.808931	-0.439848	0.356451	-1.23397	0.217216	0.672311	-0.572057	0.357087	-1.60201	0.109153	0.243526	-0.148928	0.357952	-0.416056	0.677369	0.79933	0.265779	0.35775	0.742919	0.457531	0.647517	-0.0314076	0.357283	-0.0879067	0.929951	0.96323	0.113369	0.358432	0.316292	0.751781	1	-0.196664
Aoah	ENSRNOG00000054964	acyloxyacyl hydrolase (neutrophil) [Source:RGD Symbol;Acc:1560514]	13.307	0.601058	0.379855	1.58234	0.113573	0.413581	0.671163	0.383175	-1.75158	0.0798457	0.258535	-0.141739	0.377227	0.37574	0.70711	0.895862	1.41396	0.38056	3.71547	0.000202829	0.0290752	0.523312	0.383869	1.36325	0.172802	0.33993	0.360994	0.382512	0.943747	0.345299	0.517691	-0.374239	0.379807	-0.985341	0.324457	NA	0.161034	0.378826	0.425086	0.670774	0.803367	0.401097	0.381488	1.0514	0.293074	1	-0.508845
Aoc1	ENSRNOG00000008575	amine oxidase, copper containing 1 [Source:RGD Symbol;Acc:61296]	0	NA	NA	NA	NA	NA	NA	NA	NA	NA	NA	NA	NA	NA	NA	NA	NA	NA	NA	NA	NA	NA	NA	NA	NA	NA	NA	NA	NA	NA	NA	NA	NA	NA	NA	NA	NA	NA	NA	NA	NA	NA	NA	NA	NA	NA	NA
Aoc2-ps1	NA	NA	13.8062	-0.372352	0.377017	-0.987625	0.323336	0.654081	-0.154335	0.375649	0.410848	0.681184	0.856581	0.276625	0.377975	-0.73186	0.464254	0.748013	-0.803312	0.376609	-2.13301	0.0329237	0.352024	-0.187842	0.376214	-0.499296	0.617571	0.771787	-0.175054	0.377968	-0.463144	0.643261	0.774123	0.456588	0.378898	1.20504	0.228187	NA	0.268491	0.377913	0.710455	0.477422	0.649488	0.0711925	0.378863	0.187911	0.850946	1	0.141546
Aoc3	ENSRNOG00000051307	amine oxidase, copper containing 3 [Source:RGD Symbol;Acc:62058]	23.7384	-0.457141	0.385643	-1.1854	0.23586	0.575712	-0.257986	0.384624	0.670747	0.502382	0.735043	-0.659986	0.385108	1.71377	0.0865711	0.306407	-0.0551405	0.384089	-0.143562	0.885846	0.990064	-0.0328647	0.384629	-0.0854452	0.931907	0.96617	0.143925	0.385741	0.373112	0.709065	0.822762	-0.26716	0.385384	-0.69323	0.488165	0.67574	0.488658	0.38599	1.26599	0.205518	0.371608	-0.112408	0.386088	-0.291145	0.77094	1	0.0811962
Aox1	ENSRNOG00000015354	aldehyde oxidase 1 [Source:RGD Symbol;Acc:620528]	69.798	0.299857	0.458525	0.65396	0.513137	0.79571	0.209243	0.458715	-0.456151	0.648281	0.837145	0.761964	0.458595	-1.66152	0.0966096	0.327259	-0.252864	0.458785	-0.55116	0.581524	0.905431	0.501621	0.458697	1.09358	0.27414	0.462898	-0.24233	0.458873	-0.528099	0.59743	0.738354	0.265236	0.458929	0.577946	0.563301	0.734048	-0.0652362	0.458551	-0.142266	0.88687	0.939612	0.476951	0.458899	1.03934	0.298648	1	0.534708
Aox2	ENSRNOG00000033923	aldehyde oxidase 2 [Source:RGD Symbol;Acc:1359668]	2.91122	0.0701883	0.227491	0.308532	0.757678	NA	-0.0702942	0.227544	0.308926	0.757378	NA	0.318949	0.22767	-1.40093	0.161235	NA	-0.319055	0.227722	-1.40107	0.161192	NA	-0.0334538	0.227975	-0.146743	0.883335	NA	-0.0198746	0.22937	-0.0866489	0.930951	NA	0.225358	0.22949	0.981996	0.326102	NA	-0.0952212	0.228266	-0.417151	0.676568	NA	-0.00515829	0.230141	-0.0224136	0.982118	1	0.056715
Aox3	ENSRNOG00000014555	aldehyde oxidase 3 [Source:RGD Symbol;Acc:1359328]	15.0255	-0.225701	0.404971	-0.557327	0.577304	0.832393	-0.0205874	0.404298	0.0509213	0.959388	0.990089	0.15845	0.405476	-0.390774	0.695964	0.890372	-0.404738	0.404803	-0.999839	0.317388	0.76451	-0.218624	0.405248	-0.539482	0.589554	0.749137	-0.171063	0.406381	-0.420943	0.673796	0.796258	0.251024	0.406754	0.61714	0.537143	NA	0.219607	0.405755	0.541231	0.588348	0.742543	0.164969	0.407164	0.405167	0.685355	1	-0.0269733
Aox4	NA	NA	3.6674	0	0.201828	0	1	NA	0.0442964	0.201926	-0.21937	0.826362	NA	0	0.201588	0	1	NA	0.0438892	0.201685	0.217612	0.827731	NA	0.00367328	0.202254	0.0181617	0.98551	NA	0	0.202732	0	1	NA	-0.263773	0.202715	-1.3012	0.193191	NA	-0.0777851	0.202312	-0.384482	0.700622	NA	-0.0793178	0.203215	-0.390316	0.696303	1	-0.0413643
Ap1ar	ENSRNOG00000024492	adaptor-related protein complex 1 associated regulatory protein [Source:RGD Symbol;Acc:1311435]	2532.07	-0.0168323	0.175015	-0.0961763	0.923381	0.98367	0.294545	0.174644	-1.68655	0.0916902	0.280276	0.446141	0.174717	-2.5535	0.0106647	0.0835874	-0.168428	0.174345	-0.966061	0.334014	0.774209	-0.533099	0.173793	-3.06743	0.00215905	0.0106764	-0.710518	0.173772	-4.08879	4.33622e-05	0.000297478	-0.574959	0.173328	-3.31717	0.000909353	0.00517899	-0.833789	0.174098	-4.78919	1.67452e-06	1.65811e-05	-0.140104	0.172848	-0.810563	0.417617	1	-0.117126
Ap1b1	ENSRNOG00000008786	adaptor-related protein complex 1, beta 1 subunit [Source:RGD Symbol;Acc:2064]	2030.44	-0.285808	0.161401	-1.77079	0.0765953	0.341587	0.340264	0.161304	-2.10946	0.0349048	0.152572	0.142302	0.161082	-0.883415	0.377012	0.678075	-0.0878467	0.160984	-0.545686	0.585282	0.905541	0.0401118	0.160699	0.249608	0.802891	0.895914	-0.66532	0.160345	-4.14929	3.33502e-05	0.000235356	0.101376	0.160309	0.632381	0.527138	0.706888	-0.348874	0.160435	-2.17455	0.0296641	0.0866379	0.0306376	0.159373	0.192238	0.847555	1	0.365168
Ap1g1	NA	NA	378.414	0.675721	0.358375	1.88551	0.0593606	0.307424	-0.766535	0.358475	2.13832	0.0324905	0.145446	-0.211556	0.359419	0.588604	0.556127	0.80804	0.120742	0.359518	0.335843	0.736989	0.957482	0.184382	0.359102	0.513454	0.607634	0.763968	1.13041	0.358087	3.15679	0.00159515	0.00714573	-0.10433	0.358813	-0.290765	0.771231	0.875713	0.150146	0.358765	0.418507	0.675576	0.806401	-0.304538	0.358477	-0.849533	0.395585	1	-0.179488
Ap1m1	ENSRNOG00000014454	adaptor-related protein complex 1, mu 1 subunit [Source:RGD Symbol;Acc:1307653]	1876.36	0.149612	0.186584	0.801847	0.422642	0.730228	-0.315912	0.186813	1.69106	0.0908245	0.278878	-0.198843	0.187244	1.06194	0.288261	0.590669	0.0325428	0.187472	0.173588	0.862189	0.984821	-0.758206	0.186245	-4.07102	4.68073e-05	0.000374739	-0.43696	0.185342	-2.35759	0.0183938	0.0569029	-0.6245	0.186132	-3.35514	0.000793258	0.00462467	-0.663734	0.185903	-3.57033	0.000356532	0.00207719	-0.0771614	0.184655	-0.417868	0.676044	1	-0.00533372
Ap1m2	ENSRNOG00000043093	adaptor-related protein complex 1, mu 2 subunit [Source:RGD Symbol;Acc:1561490]	6.26969	0	0.248881	0	1	NA	0	0.248915	0	1	1	0	0.248592	0	1	1	0	0.248626	0	1	NA	0	0.249254	0	1	NA	-0.123003	0.250117	-0.491782	0.622874	NA	0	0.249636	0	1	NA	-0.525609	0.249934	-2.10299	0.0354662	NA	-0.403938	0.251167	-1.60825	0.107781	1	0.123808
Ap1s1	ENSRNOG00000001415	adaptor-related protein complex 1, sigma 1 subunit [Source:RGD Symbol;Acc:1305911]	6524.11	-0.251937	0.147453	-1.70859	0.0875276	0.366326	-0.1046	0.14763	0.708533	0.478614	0.718369	-0.259866	0.147537	1.76135	0.0781787	0.289739	-0.0966715	0.147714	-0.654452	0.512821	0.877945	-0.436468	0.147424	-2.96062	0.00307017	0.0143453	-0.676178	0.147094	-4.59691	4.28812e-06	3.69678e-05	-0.284667	0.147287	-1.93274	0.053268	0.145823	-0.36751	0.147144	-2.49762	0.0125031	0.0428281	0.0567313	0.146784	0.386495	0.69913	1	0.34431
Ap1s2	ENSRNOG00000038686	adaptor-related protein complex 1, sigma 2 subunit [Source:RGD Symbol;Acc:1561862]	1561.51	0.325762	0.22043	1.47784	0.139449	0.457398	-1.13659	0.221451	5.13248	2.85948e-07	1.90859e-05	-1.12642	0.222282	5.06754	4.02984e-07	3.3511e-05	0.315592	0.223293	1.41335	0.157552	0.618766	-0.227368	0.221987	-1.02424	0.305722	0.496118	-0.0422793	0.219701	-0.19244	0.847397	0.911024	-0.342979	0.22241	-1.5421	0.123049	0.269104	-0.309768	0.220251	-1.40643	0.159596	0.311608	0.0582731	0.219521	0.265456	0.790658	1	0.951504
Ap1s3	ENSRNOG00000049873	adaptor-related protein complex 1, sigma 3 subunit [Source:RGD Symbol;Acc:1311772]	78.0935	-2.16509	0.421522	-5.13637	2.80094e-07	0.000155729	1.06776	0.425049	-2.51208	0.0120023	0.074512	-0.55325	0.41481	1.33374	0.182288	0.466421	-0.544084	0.418449	-1.30024	0.193518	0.653078	-0.94034	0.416524	-2.25759	0.0239712	0.0763996	-2.04934	0.420394	-4.8748	1.08917e-06	1.08197e-05	-0.450621	0.413682	-1.08929	0.276024	0.46895	0.214561	0.412758	0.519822	0.603188	0.755164	0.0988046	0.411584	0.24006	0.810284	1	0.041239
Ap2a1	ENSRNOG00000026243	adaptor-related protein complex 2, alpha 1 subunit [Source:RGD Symbol;Acc:1306254]	1714.9	0.902971	0.170457	5.29734	1.17504e-07	7.44664e-05	-0.686736	0.169986	4.03996	5.34598e-05	0.00131205	0.279434	0.171451	-1.62982	0.103139	0.340358	-0.0631999	0.170982	-0.369628	0.711659	0.951365	-0.568856	0.169885	-3.34848	0.000812565	0.00460862	0.12058	0.168426	0.715922	0.474039	0.637499	-0.430613	0.169519	-2.5402	0.0110789	0.042713	-0.972677	0.170123	-5.71748	1.08113e-08	1.55885e-07	-0.190286	0.168087	-1.13207	0.257607	1	-0.00269921
Ap2a2	ENSRNOG00000019534	adaptor-related protein complex 2, alpha 2 subunit [Source:RGD Symbol;Acc:71015]	2472.15	0.0208382	0.159031	0.131033	0.895749	0.974457	-0.271524	0.159434	1.70305	0.0885581	0.275027	-0.311254	0.15979	1.9479	0.0514271	0.225821	0.0605683	0.160191	0.378101	0.705355	0.950209	-0.993426	0.158554	-6.26555	3.7151e-10	7.76623e-09	-1.16092	0.157345	-7.37818	1.6047e-13	4.25435e-12	-1.0053	0.158389	-6.34703	2.19515e-10	4.75211e-09	-1.33438	0.157783	-8.4571	2.74102e-17	1.03654e-15	-0.152624	0.156083	-0.977841	0.328153	1	0.43902
Ap2b1	ENSRNOG00000061543	adaptor-related protein complex 2, beta 1 subunit [Source:RGD Symbol;Acc:71048]	2788.28	0.138681	0.170157	0.815017	0.415063	0.725471	-0.183224	0.170178	1.07666	0.281632	0.541006	-0.0134067	0.170357	0.0786977	0.937273	0.992784	-0.0311359	0.170377	-0.182747	0.854997	0.983136	0.521873	0.170488	3.06106	0.00220555	0.0108574	0.452893	0.169907	2.66553	0.00768667	0.0276514	0.476962	0.170239	2.80172	0.00508306	0.0225989	0.343299	0.170241	2.01655	0.0437426	0.117948	0.0290867	0.169991	0.171108	0.864139	1	0.252203
Ap2m1	ENSRNOG00000001709	adaptor-related protein complex 2, mu 1 subunit [Source:RGD Symbol;Acc:620135]	25141.9	0.083938	0.102178	0.821486	0.411369	0.721948	0.190575	0.102119	-1.86621	0.0620118	0.22008	0.17584	0.102192	-1.72068	0.0853094	0.303775	0.098673	0.102132	0.966128	0.33398	0.774209	-0.261546	0.102026	-2.56353	0.0103612	0.0392079	-0.419763	0.101995	-4.11554	3.86274e-05	0.000267828	-0.353325	0.10201	-3.46365	0.000532897	0.00328852	-0.532251	0.102075	-5.21434	1.84476e-07	2.16593e-06	-0.0285499	0.101891	-0.280201	0.779323	1	-0.0323574
Ap2s1	ENSRNOG00000015865	adaptor-related protein complex 2, sigma 1 subunit [Source:RGD Symbol;Acc:620188]	7180.55	-0.214353	0.126604	-1.69309	0.0904377	0.372294	0.171683	0.126613	-1.35596	0.175112	0.415467	-0.166973	0.126647	1.31842	0.187365	0.473588	0.124302	0.126656	0.981421	0.326385	0.771772	0.761235	0.126747	6.00595	1.90215e-09	3.59558e-08	0.6027	0.126651	4.75874	1.94806e-06	1.81661e-05	0.665253	0.126713	5.2501	1.52019e-07	2.13499e-06	0.877255	0.126724	6.92259	4.43458e-12	1.00866e-10	0.0602025	0.12677	0.474895	0.634862	1	-0.0131469
Ap3b1	ENSRNOG00000010624	adaptor-related protein complex 3, beta 1 subunit [Source:RGD Symbol;Acc:1310256]	381.39	-0.116372	0.307714	-0.378182	0.705295	0.898863	-0.250228	0.308406	0.811358	0.41716	0.669348	-0.398095	0.308528	1.2903	0.196945	0.486927	0.0314953	0.309219	0.101854	0.918872	0.994668	-0.112833	0.30827	-0.366019	0.714351	0.840637	0.0207394	0.3069	0.0675768	0.946122	0.969962	0.133186	0.308318	0.431978	0.665758	0.809184	0.393749	0.307623	1.27997	0.200555	0.3658	0.256638	0.30681	0.836473	0.402889	1	0.116656
Ap3d1	ENSRNOG00000018977	adaptor-related protein complex 3, delta 1 subunit [Source:RGD Symbol;Acc:1308659]	4950.2	0.0961775	0.158211	0.607908	0.543248	0.814795	0.0178409	0.15816	-0.112803	0.910187	0.969436	-0.00811753	0.158303	0.0512784	0.959104	0.99874	0.122136	0.158252	0.771781	0.440244	0.844724	0.95111	0.158436	6.00314	1.93541e-09	3.6527e-08	0.725442	0.158187	4.58599	4.51834e-06	3.88168e-05	0.926845	0.158428	5.85027	4.90778e-09	8.64933e-08	0.647341	0.158353	4.08796	4.35186e-05	0.000320297	0.0180766	0.158329	0.114171	0.909102	1	0.207827
Ap3m1	ENSRNOG00000011461	adaptor-related protein complex 3, mu 1 subunit [Source:RGD Symbol;Acc:620417]	719.474	0.24503	0.280046	0.874963	0.381594	0.702604	0.147653	0.279385	-0.528492	0.597158	0.803622	0.078586	0.280523	-0.280141	0.77937	0.927807	0.314097	0.279864	1.12232	0.261726	0.71815	0.0272353	0.278994	0.0976198	0.922234	0.961677	-0.0331938	0.278736	-0.119087	0.905207	0.946237	-0.341819	0.279116	-1.22465	0.220707	0.404346	-0.46528	0.279464	-1.6649	0.095932	0.213899	-0.187056	0.278151	-0.6725	0.501265	1	-0.0872237
Ap3m2	ENSRNOG00000018650	adaptor-related protein complex 3, mu 2 subunit [Source:RGD Symbol;Acc:70969]	1360.7	0.249019	0.220607	1.12879	0.258986	0.598019	-0.705014	0.221365	3.18485	0.00144827	0.0162668	-0.155032	0.221315	0.7005	0.483615	0.761009	-0.300963	0.22207	-1.35526	0.175334	0.638936	-0.775917	0.221093	-3.50945	0.000449029	0.0027376	-0.415933	0.219295	-1.89668	0.0578705	0.140855	-0.555382	0.220202	-2.52215	0.0116641	0.0445601	-0.755799	0.219963	-3.43602	0.00059032	0.00322297	-0.0908474	0.218647	-0.415497	0.677778	1	0.34503
Ap3s1	ENSRNOG00000003829	adaptor-related protein complex 3, sigma 1 subunit [Source:RGD Symbol;Acc:1311115]	1346.31	-0.0428749	0.246518	-0.173922	0.861927	0.963109	0.0251739	0.246518	-0.102118	0.918663	0.972409	0.0734626	0.246575	-0.297933	0.765755	0.923098	-0.0911636	0.246575	-0.36972	0.711591	0.951365	-0.417798	0.245973	-1.69855	0.0894042	0.210752	-0.437666	0.245582	-1.78216	0.0747235	0.17164	-0.416143	0.245605	-1.69436	0.0901969	0.214933	-0.269715	0.245987	-1.09646	0.272878	0.450702	0.125076	0.24505	0.510412	0.609763	1	-0.0053054
Ap3s2	ENSRNOG00000043141	adaptor-related protein complex 3, sigma 2 subunit [Source:RGD Symbol;Acc:1586888]	1847.51	-0.490762	0.17963	-2.73208	0.00629366	0.0937896	0.322392	0.179805	-1.79301	0.0729716	0.242934	-0.406713	0.179742	2.26275	0.0236509	0.139063	0.238343	0.179918	1.32473	0.18526	0.647315	-0.153535	0.17911	-0.857209	0.391329	0.581476	-0.437095	0.17906	-2.44105	0.0146445	0.0471995	-0.25469	0.179272	-1.42069	0.155406	0.317593	0.134232	0.178943	0.750137	0.453172	0.629347	0.0805643	0.178371	0.451667	0.651509	1	-0.0388323
Ap4b1	ENSRNOG00000019455	adaptor-related protein complex 4, beta 1 subunit [Source:RGD Symbol;Acc:1310529]	379.098	0.816173	0.284201	2.87182	0.0040812	0.0743446	0.606066	0.277869	-2.18112	0.0291743	0.135922	1.40345	0.28305	-4.9583	7.11144e-07	5.36518e-05	0.0187929	0.276688	0.0679209	0.945849	0.998016	0.20619	0.276196	0.746535	0.455344	0.64014	-0.891952	0.275991	-3.23181	0.00123008	0.00569021	-0.221969	0.274971	-0.807244	0.419526	0.61345	-1.49169	0.281863	-5.29225	1.20822e-07	1.46893e-06	0.216439	0.273573	0.791158	0.428852	1	0.492076
Ap4e1	ENSRNOG00000022938	adaptor-related protein complex 4, epsilon 1 subunit [Source:RGD Symbol;Acc:1562199]	38.8958	0.885618	0.452791	1.95591	0.0504756	0.283424	-0.838971	0.452861	1.8526	0.0639396	0.224117	0.298096	0.452319	-0.659041	0.50987	0.778899	-0.251449	0.452389	-0.555825	0.578331	0.903973	-0.212963	0.452647	-0.470483	0.63801	0.786957	0.553321	0.453596	1.21985	0.22252	0.382172	0.117078	0.453022	0.258439	0.796068	0.890804	0.0196392	0.452464	0.0434051	0.965379	0.982485	0.351936	0.453271	0.776437	0.437491	1	0.0726871
Ap4m1	ENSRNOG00000001353	adaptor-related protein complex 4, mu 1 subunit [Source:RGD Symbol;Acc:1310233]	99.0374	-0.520105	0.459845	-1.13104	0.258036	0.597399	0.295775	0.45992	-0.6431	0.520159	0.749235	0.00254754	0.459721	-0.00554149	0.995579	1	-0.226878	0.459797	-0.493431	0.621708	0.919957	-1.16567	0.459476	-2.53696	0.0111819	0.0415943	-1.29262	0.459478	-2.81324	0.00490457	0.0188184	-1.06853	0.459312	-2.32638	0.0199983	0.0686968	-1.132	0.459355	-2.46431	0.0137276	0.0462009	-0.35948	0.458979	-0.783216	0.4335	1	-0.168829
Ap4s1	ENSRNOG00000005765	adaptor-related protein complex 4, sigma 1 subunit [Source:RGD Symbol;Acc:1311990]	700	-0.673469	0.251969	-2.67282	0.0075217	0.102686	0.512402	0.252201	-2.03172	0.0421818	0.172329	-0.172561	0.251392	0.686421	0.492448	0.766585	0.0114946	0.251624	0.0456815	0.963564	0.999581	0.201599	0.251317	0.802171	0.422454	0.610437	-0.0831259	0.251822	-0.330098	0.741326	0.845818	0.0348262	0.250797	0.138862	0.889559	0.942804	0.629457	0.251312	2.50469	0.012256	0.0421455	0.0391145	0.251163	0.155733	0.876243	1	-0.227677
Ap5b1	ENSRNOG00000026114	adaptor-related protein complex 5, beta 1 subunit [Source:RGD Symbol;Acc:1562657]	299.912	0.0662981	0.356377	0.186034	0.852418	0.958679	0.186652	0.355866	-0.524501	0.59993	0.805539	0.314119	0.356259	-0.881716	0.37793	0.678757	-0.0611692	0.355748	-0.171945	0.863481	0.984821	0.0121553	0.355302	0.0342112	0.972709	0.9857	-0.0440059	0.355097	-0.123926	0.901374	0.944026	0.0565568	0.354846	0.159384	0.873366	0.934245	0.0440916	0.356042	0.123838	0.901443	0.948318	0.154396	0.35476	0.435212	0.663409	1	-0.130491
Ap5m1	ENSRNOG00000014148	adaptor-related protein complex 5, mu 1 subunit [Source:RGD Symbol;Acc:1308087]	80.3118	0.0925507	0.423737	0.218416	0.827105	0.948918	0.113113	0.422695	-0.2676	0.789007	0.916935	1.15701	0.420968	-2.74844	0.005988	0.0572656	-0.951341	0.419913	-2.26557	0.0234778	0.309082	-0.969254	0.419036	-2.31305	0.0207197	0.0683897	-0.953448	0.418199	-2.27989	0.0226143	0.0669361	0.853015	0.417198	2.04463	0.0408913	0.11972	-1.19093	0.419878	-2.83638	0.0045628	0.0186197	-0.144936	0.414239	-0.349883	0.726426	1	-0.128919
Ap5s1	ENSRNOG00000021249	adaptor-related protein complex 5, sigma 1 subunit [Source:RGD Symbol;Acc:1561852]	142.906	0.574011	0.411142	1.39614	0.162673	0.490053	-0.00833519	0.409986	0.0203305	0.98378	0.999694	0.201804	0.41201	-0.489803	0.624273	0.849937	0.363872	0.410858	0.885639	0.375812	0.804332	0.269925	0.410053	0.65827	0.510365	0.686472	0.103298	0.409197	0.25244	0.800701	0.883394	0.207667	0.410751	0.505579	0.613152	0.770043	-0.255685	0.411117	-0.621929	0.533989	0.698611	0.215028	0.409171	0.525522	0.599221	1	0.174963
Ap5z1	ENSRNOG00000001107	adaptor-related protein complex 5, zeta 1 subunit [Source:RGD Symbol;Acc:1593125]	450.83	-0.134613	0.278801	-0.482828	0.629218	0.862229	0.236127	0.278594	-0.847567	0.396679	0.650645	-0.47818	0.279784	1.70911	0.0874314	0.307679	0.579694	0.279577	2.07346	0.0381292	0.374349	0.875612	0.279349	3.13448	0.00172162	0.00882128	0.646521	0.278971	2.31752	0.0204754	0.0619439	0.369948	0.280153	1.32052	0.186662	0.359706	0.486103	0.278823	1.74341	0.0812622	0.189903	-0.29503	0.278994	-1.05748	0.290293	1	-0.00703542
Apaf1	ENSRNOG00000008022	apoptotic peptidase activating factor 1 [Source:RGD Symbol;Acc:620575]	238.066	0.679208	0.399898	1.69845	0.0894225	0.370649	-0.578828	0.399725	1.44807	0.147598	0.374488	0.204616	0.400533	-0.51086	0.609449	0.841992	-0.104236	0.40036	-0.260357	0.794589	0.971969	-0.0461751	0.399989	-0.115441	0.908096	0.954218	0.69149	0.399062	1.73279	0.0831335	0.186272	0.225776	0.399741	0.564804	0.572207	0.741271	-0.35763	0.399886	-0.89433	0.371146	0.553397	-0.369911	0.399049	-0.926981	0.353936	1	-0.158837
Apba1	ENSRNOG00000014928	amyloid beta (A4) precursor protein-binding, family A, member 1 [Source:RGD Symbol;Acc:620844]	348.961	1.12273	0.280371	4.00444	6.21645e-05	0.0058025	-1.78348	0.282711	6.30847	2.81801e-10	4.08612e-08	0.00217141	0.282636	-0.00768271	0.99387	1	-0.662917	0.284955	-2.32639	0.0199976	0.29072	-0.0799962	0.285458	-0.280238	0.779295	0.881332	1.33844	0.279182	4.79414	1.63375e-06	1.55528e-05	0.487685	0.28217	1.72834	0.0839272	0.203836	0.314709	0.282163	1.11535	0.264702	0.44098	0.0990027	0.280982	0.352345	0.72458	1	0.365043
Apba2	ENSRNOG00000016358	amyloid beta (A4) precursor protein-binding, family A, member 2 [Source:RGD Symbol;Acc:620845]	2783.2	0.42458	0.153979	2.75739	0.00582641	0.0905236	-0.319914	0.153869	2.07913	0.0376051	0.159768	-0.0803148	0.154461	0.519969	0.603085	0.838213	0.184981	0.154351	1.19844	0.230746	0.68885	0.283629	0.154108	1.84046	0.0657013	0.167572	0.565026	0.15355	3.67975	0.000233467	0.00130589	0.0723562	0.154064	0.469651	0.638604	0.789441	0.118427	0.154102	0.7685	0.44219	0.619539	-0.0220191	0.153674	-0.143284	0.886066	1	0.0385166
Apba3	ENSRNOG00000020466	amyloid beta (A4) precursor protein-binding, family A, member 3 [Source:RGD Symbol;Acc:620846]	306.206	-0.0207608	0.3401	-0.0610432	0.951325	0.991061	-0.149044	0.340516	0.4377	0.661603	0.845092	0.331724	0.339739	-0.976409	0.328862	0.632948	-0.501529	0.340155	-1.47441	0.14037	0.603907	-0.53905	0.339439	-1.58806	0.112273	0.248527	-0.521815	0.337964	-1.54399	0.12259	0.248993	0.0571091	0.337934	0.168995	0.865801	0.930556	-0.355904	0.338893	-1.05019	0.293629	0.472936	0.14515	0.336747	0.431036	0.666442	1	0.131808
Apbb1	ENSRNOG00000018020	amyloid beta (A4) precursor protein-binding, family B, member 1 (Fe65) [Source:RGD Symbol;Acc:2122]	8844.13	0.0311794	0.12244	0.254651	0.798993	0.938711	-0.259098	0.122549	2.11423	0.0344957	0.151414	-0.0672119	0.122553	0.548433	0.583395	0.826984	-0.160706	0.122662	-1.31015	0.190143	0.649332	-0.591004	0.122373	-4.82954	1.36846e-06	1.5371e-05	-0.47948	0.122045	-3.92873	8.53955e-05	0.000545187	-0.376865	0.122212	-3.08371	0.00204438	0.0104531	-0.542776	0.122196	-4.44186	8.9184e-06	7.66174e-05	-0.0321164	0.121799	-0.263683	0.792024	1	0.147573
Apbb1ip	ENSRNOG00000017803	amyloid beta (A4) precursor protein-binding, family B, member 1 interacting protein [Source:RGD Symbol;Acc:1304795]	303.916	0.576387	0.334213	1.72461	0.0845974	0.359635	0.410487	0.332627	-1.23407	0.217175	0.46744	0.511027	0.334517	-1.52766	0.126597	0.382005	0.475847	0.332933	1.42926	0.152931	0.617073	1.01946	0.333143	3.06014	0.00221233	0.0108862	1.33367	0.334362	3.9887	6.64359e-05	0.000437278	1.04893	0.334271	3.13795	0.00170135	0.00892429	0.916396	0.336276	2.72513	0.00642758	0.0247932	0.159113	0.336424	0.472953	0.636247	1	-0.724694
Apbb3	ENSRNOG00000017849	amyloid beta (A4) precursor protein-binding, family B, member 3 [Source:RGD Symbol;Acc:620853]	701.249	0.0741896	0.257013	0.288661	0.772841	0.927424	0.207814	0.256244	-0.810998	0.417367	0.669462	0.313337	0.256871	-1.21982	0.222533	0.515579	-0.0313336	0.256102	-0.122348	0.902623	0.99309	-0.775191	0.254445	-3.04659	0.0023145	0.0113183	-0.85316	0.254221	-3.35598	0.000790854	0.00385972	-0.555906	0.254168	-2.18716	0.0287307	0.0914587	-0.807725	0.255361	-3.16307	0.00156114	0.0074171	0.119624	0.252549	0.473668	0.635736	1	-0.129845
Apc	ENSRNOG00000020423	adenomatous polyposis coli [Source:RGD Symbol;Acc:2123]	4577.55	0.0977744	0.161895	0.603936	0.545886	0.816118	-0.493504	0.162041	3.04555	0.00232257	0.0232934	-0.265254	0.162059	1.63678	0.101677	0.337801	-0.130476	0.162205	-0.804388	0.421173	0.834777	1.38963	0.162822	8.53466	1.40571e-17	7.90941e-16	1.64553	0.162291	10.1394	3.69434e-24	3.61459e-22	1.32141	0.162499	8.1318	4.22961e-16	1.95744e-14	1.59037	0.16246	9.78931	1.25147e-22	8.12008e-21	0.0426206	0.162854	0.261711	0.793544	1	0.237607
Apc2	ENSRNOG00000033791	adenomatosis polyposis coli 2 [Source:RGD Symbol;Acc:1308256]	1522.69	0.337888	0.194196	1.73994	0.0818696	0.353711	-0.478906	0.194336	2.46432	0.0137275	0.081493	-0.388102	0.195058	1.98967	0.0466268	0.212856	0.247084	0.195198	1.26581	0.205581	0.662886	0.563591	0.195093	2.88883	0.00386678	0.0173343	0.702239	0.193876	3.6221	0.00029222	0.00160039	0.431703	0.195247	2.21106	0.0270315	0.0871518	0.472443	0.194584	2.42796	0.0151838	0.0501706	0.108092	0.194265	0.556413	0.577928	1	0.340258
Apeh	ENSRNOG00000029572	acylaminoacyl-peptide hydrolase [Source:RGD Symbol;Acc:2125]	436.285	-0.372795	0.24721	-1.50801	0.131553	0.444077	0.0393485	0.248198	-0.158537	0.874034	0.954184	-0.513807	0.248226	2.06991	0.0384604	0.188732	0.180361	0.24921	0.72373	0.469231	0.857555	-0.461687	0.246524	-1.87279	0.0610975	0.158545	-0.0734341	0.246244	-0.298217	0.765538	0.861438	-0.286127	0.247184	-1.15755	0.247049	0.436504	0.0148644	0.245591	0.0605252	0.951737	0.97507	-0.284496	0.244618	-1.16302	0.24482	1	-0.427602
Apex1	ENSRNOG00000009663	APEX nuclease (multifunctional DNA repair enzyme) 1 [Source:RGD Symbol;Acc:2126]	2022.06	0.217339	0.197269	1.10174	0.270577	0.608912	-0.677184	0.197856	3.42261	0.000620232	0.00862019	-0.355569	0.198032	1.79551	0.0725721	0.277373	-0.104276	0.198617	-0.525013	0.599574	0.910463	-0.753086	0.197641	-3.81038	0.000138752	0.000988585	-0.261366	0.196355	-1.33109	0.183159	0.332399	-0.588287	0.197278	-2.98201	0.00286358	0.0139097	-0.433103	0.196908	-2.19952	0.0278407	0.0823663	0.0456018	0.195992	0.232672	0.816016	1	0.185464
Apex2	ENSRNOG00000000166	APEX nuclease (apurinic/apyrimidinic endonuclease) 2 [Source:RGD Symbol;Acc:1565983]	148.859	-0.752126	0.409909	-1.83486	0.0665262	0.322508	0.206248	0.410914	-0.501925	0.615721	0.816066	0.227067	0.408576	-0.555753	0.57838	0.823597	-0.772946	0.409586	-1.88714	0.059142	0.449231	-0.21451	0.409795	-0.523457	0.600656	0.758681	-0.716626	0.409057	-1.7519	0.0797911	0.18063	0.562551	0.40811	1.37843	0.168071	0.335593	0.208873	0.408486	0.511334	0.609117	0.758813	0.173373	0.407628	0.425321	0.670603	1	0.295869
Aph1a	ENSRNOG00000023816	APH1A gamma secretase subunit [Source:RGD Symbol;Acc:1311546]	986.011	-0.258101	0.22501	-1.14706	0.251355	0.589745	0.147132	0.225183	-0.65339	0.513505	0.743642	0.174145	0.224601	-0.775354	0.438131	0.727361	-0.285114	0.224774	-1.26845	0.204638	0.662409	-0.488432	0.224062	-2.1799	0.0292652	0.0896419	-0.362839	0.223911	-1.62046	0.105134	0.221479	-0.200232	0.223273	-0.896806	0.369823	0.566271	-0.115955	0.224042	-0.517559	0.604766	0.756291	-0.0112173	0.222938	-0.0503157	0.959871	1	-0.272725
Aph1b	NA	NA	0.889325	0.215127	0.209538	1.02667	0.304575	NA	-0.154434	0.210063	0.735182	0.462229	NA	0.105064	0.20792	-0.505309	0.613342	NA	-0.0443708	0.208446	-0.212864	0.831433	NA	0.0214319	0.210324	0.101899	0.918837	NA	0.140541	0.213894	0.657058	0.511144	NA	-0.0102992	0.212323	-0.0485073	0.961312	NA	-0.117271	0.210713	-0.556544	0.577839	NA	-0.0426848	0.215057	-0.198481	0.842668	1	0.0353253
Api5	ENSRNOG00000009689	apoptosis inhibitor 5 [Source:RGD Symbol;Acc:1309772]	1859.63	0.194284	0.204451	0.950271	0.341975	0.671008	-0.654519	0.204908	3.19421	0.00140215	0.0158386	-0.0869098	0.204781	0.424405	0.671271	0.87919	-0.373325	0.205236	-1.819	0.0689117	0.476752	-0.270002	0.205009	-1.31702	0.187831	0.359791	0.483289	0.204142	2.36742	0.0179126	0.055708	0.164734	0.204469	0.805665	0.420436	0.614476	0.242737	0.204515	1.18689	0.23527	0.408048	-0.0462676	0.204206	-0.226574	0.820755	1	-0.0987726
Apip	ENSRNOG00000007446	APAF1 interacting protein [Source:RGD Symbol;Acc:1564562]	307.957	0.116673	0.292143	0.39937	0.689621	0.890862	0.596354	0.290041	-2.0561	0.0397724	0.165696	0.519286	0.291565	-1.78103	0.0749075	0.282816	0.193741	0.289458	0.669321	0.503291	0.872651	0.662689	0.289622	2.28812	0.0221307	0.0717682	0.0339359	0.289948	0.117041	0.906827	0.946923	0.580328	0.289777	2.00267	0.0452125	0.129268	0.315957	0.29241	1.08053	0.279908	0.458566	0.398694	0.290218	1.37377	0.169512	1	0.0323986
Apitd1	NA	NA	971.127	0.140366	0.22012	0.637679	0.523683	0.802145	0.0138991	0.21991	-0.0632033	0.949605	0.986516	-0.0702326	0.220532	0.318469	0.750129	0.91591	0.224498	0.220323	1.01895	0.308227	0.758061	1.18277	0.221154	5.3482	8.88345e-08	1.26288e-06	0.945752	0.220275	4.2935	1.75882e-05	0.000132697	0.872846	0.220941	3.95058	7.79624e-05	0.000615892	1.06417	0.221235	4.81012	1.5084e-06	1.50328e-05	0.258782	0.22139	1.1689	0.242445	1	0.223123
Aplf	ENSRNOG00000043059	aprataxin and PNKP like factor [Source:RGD Symbol;Acc:1565557]	99.4278	-0.252184	0.461002	-0.547035	0.584355	0.836606	0.393664	0.461005	-0.853926	0.393146	0.648101	-0.0285831	0.461003	0.0620019	0.950561	0.997119	0.170063	0.461006	0.368895	0.712206	0.951365	0.037422	0.461011	0.0811737	0.935304	0.967471	-0.498905	0.461011	-1.0822	0.279165	0.447161	-0.2399	0.461011	-0.520377	0.602801	0.762407	-0.0611717	0.461009	-0.132691	0.894438	0.944135	0.185549	0.461017	0.402477	0.687333	1	0.142662
Apln	ENSRNOG00000003984	apelin [Source:RGD Symbol;Acc:620672]	547.544	0.440446	0.26252	1.67776	0.0933933	0.376989	0.252275	0.260826	-0.967216	0.333436	0.595324	0.336062	0.263063	-1.2775	0.201426	0.492532	0.356659	0.261373	1.36456	0.172392	0.635926	0.152398	0.260295	0.585481	0.558224	0.725368	0.0788743	0.260259	0.303061	0.761843	0.858526	-0.17741	0.26064	-0.680673	0.496078	0.681398	-0.407831	0.262028	-1.55644	0.119602	0.252476	-0.0462599	0.259762	-0.178086	0.858656	1	-0.178751
Aplnr	ENSRNOG00000009227	apelin receptor [Source:RGD Symbol;Acc:621645]	24.5048	-0.330166	0.40734	-0.810541	0.417629	0.727423	0.936165	0.408242	-2.29316	0.0218387	0.112677	-0.53627	0.40657	1.31901	0.187165	0.473268	1.14227	0.407473	2.8033	0.00505827	0.15611	0.367385	0.409341	0.897504	0.36945	0.560446	-0.166198	0.408124	-0.407225	0.683843	0.803509	-0.496971	0.407465	-1.21967	0.222592	0.406868	0.0659675	0.408222	0.161597	0.871623	0.930437	-0.0979998	0.409006	-0.239605	0.810637	1	-0.402581
Aplp1	ENSRNOG00000020851	amyloid beta (A4) precursor-like protein 1 [Source:RGD Symbol;Acc:69257]	54211.2	0.0718904	0.125143	0.574466	0.565653	0.827	-0.675775	0.125181	5.3984	6.72365e-08	5.23573e-06	-0.571457	0.125186	4.56485	4.99855e-06	0.000270951	-0.032428	0.125224	-0.258959	0.795666	0.971969	-0.0523109	0.125199	-0.417823	0.676076	0.814263	0.528733	0.125132	4.22541	2.38507e-05	0.000175227	0.0315088	0.125184	0.2517	0.801273	0.893639	0.400909	0.125149	3.20347	0.00135784	0.00659811	-0.0559332	0.125137	-0.446975	0.654893	1	0.0947316
Aplp2	ENSRNOG00000047179	amyloid beta (A4) precursor-like protein 2 [Source:RGD Symbol;Acc:2128]	9957.55	-0.0204929	0.0985368	-0.207972	0.835251	0.952136	-0.0820328	0.0985713	0.832218	0.405286	0.659253	-0.175997	0.0986543	1.78397	0.074428	0.281665	0.073471	0.0986887	0.744472	0.456591	0.851949	0.38403	0.0986536	3.89271	9.91302e-05	0.000735444	0.51032	0.0984775	5.1821	2.19404e-07	2.47015e-06	0.210972	0.0985577	2.14059	0.0323068	0.100176	0.535603	0.0985973	5.43223	5.56533e-08	7.20687e-07	0.00479033	0.098538	0.0486141	0.961227	1	-0.0442575
Apmap	ENSRNOG00000006795	adipocyte plasma membrane associated protein [Source:RGD Symbol;Acc:1308874]	759.759	1.11426	0.293363	3.79823	0.000145734	0.0102619	-0.188661	0.291379	0.647475	0.517325	0.747679	1.11506	0.293557	-3.79845	0.000145603	0.00387305	-0.189462	0.291575	-0.64979	0.515828	0.879669	-0.503249	0.290889	-1.73004	0.0836237	0.200401	-0.343078	0.29014	-1.18246	0.237023	0.399129	-0.174377	0.290479	-0.600307	0.548301	0.723376	-1.43516	0.292795	-4.90157	9.50716e-07	9.85738e-06	0.0221802	0.289565	0.0765984	0.938943	1	0.0284905
Apoa1	ENSRNOG00000045679	apolipoprotein A-I [Source:RGD Symbol;Acc:2130]	3.24717	-0.11601	0.175291	-0.661812	0.508092	NA	0.128098	0.175323	-0.730641	0.464998	NA	-0.141825	0.175092	0.810005	0.417937	NA	0.153914	0.175124	0.878886	0.379463	NA	0.15444	0.175502	0.879989	0.378866	NA	0.0264977	0.175787	0.150738	0.880182	NA	0	0.175562	0	1	NA	0.142472	0.175557	0.811543	0.417054	NA	0	0.176052	0	1	1	0
Apoa1bp	ENSRNOG00000019201	apolipoprotein A-I binding protein [Source:RGD Symbol;Acc:1304699]	2402.49	-0.0913523	0.178198	-0.512644	0.6082	0.850562	0.00454485	0.17826	-0.0254956	0.97966	0.997989	-0.11667	0.178356	0.654142	0.51302	0.781587	0.0298624	0.178417	0.167374	0.867076	0.986368	0.145821	0.178196	0.818313	0.413178	0.601509	0.170039	0.177874	0.955952	0.339096	0.511049	0.0399515	0.177987	0.224463	0.822397	0.90543	0.227454	0.178058	1.27741	0.201456	0.366875	-0.0339379	0.177734	-0.190948	0.848566	1	-0.0287636
Apoa2	ENSRNOG00000003500	apolipoprotein A-II [Source:RGD Symbol;Acc:2131]	0.714981	0.218779	0.1003	2.18125	0.0291646	NA	-0.219131	0.100286	2.18506	0.0288843	NA	0	0.0999781	0	1	NA	0	0.0999642	0	1	NA	0	0.100292	0	1	NA	0.174139	0.100843	1.72683	0.0841981	NA	0	0.100471	0	1	NA	0	0.100381	0	1	NA	0.0456067	0.100925	0.451888	0.65135	1	0.0455528
Apoa4	#N/A	#N/A	0.492577	0	0.0999176	0	1	NA	0	0.0999176	0	1	NA	0	0.0998606	0	1	NA	0	0.0998606	0	1	NA	0	0.100007	0	1	NA	0	0.100187	0	1	NA	0	0.100102	0	1	NA	-0.0976142	0.100185	-0.974337	0.329889	NA	-0.102449	0.100454	-1.01986	0.307797	1	0
Apoa5	ENSRNOG00000018436	apolipoprotein A-V [Source:RGD Symbol;Acc:70903]	9.51484	-0.127095	0.270521	-0.469817	0.638486	NA	0	0.270346	0	1	1	0.552548	0.271113	-2.03807	0.041543	0.198352	-0.678383	0.270939	-2.50383	0.0122859	0.227418	-0.277186	0.270938	-1.02306	0.30628	NA	-0.113502	0.27137	-0.418254	0.675762	0.798121	0.655718	0.271834	2.4122	0.0158565	NA	0.0273722	0.271042	0.100989	0.919559	0.957484	0.0137786	0.271891	0.0506771	0.959583	1	-0.164944
Apob	ENSRNOG00000005542	apolipoprotein B [Source:RGD Symbol;Acc:2129]	1.23835	0	0.101247	0	1	NA	0	0.101258	0	1	NA	0	0.101158	0	1	NA	0	0.101169	0	1	NA	0	0.101361	0	1	NA	0	0.10158	0	1	NA	-0.0451482	0.101496	-0.444826	0.656445	NA	0	0.101395	0	1	NA	0	0.101728	0	1	1	0
Apobec1	ENSRNOG00000015411	apolipoprotein B mRNA editing enzyme, catalytic polypeptide 1 [Source:RGD Symbol;Acc:2133]	36.3595	1.41868	0.45746	3.10122	0.00192727	0.049366	1.3717	0.452796	-3.02939	0.0024505	0.0242249	1.17952	0.458145	-2.57456	0.0100366	0.0800758	1.61085	0.453541	3.55172	0.000382715	0.0398871	0.64318	0.451505	1.42453	0.154294	0.313193	0.254529	0.453994	0.560645	0.57504	0.720656	-0.699594	0.453824	-1.54155	0.123182	0.269246	-1.25011	0.45721	-2.73422	0.00625287	0.0242407	-0.0859603	0.453728	-0.189453	0.849738	1	-0.983045
Apobec2	ENSRNOG00000012303	apolipoprotein B mRNA editing enzyme, catalytic polypeptide-like 2 [Source:RGD Symbol;Acc:1308727]	25.146	-0.498296	0.432288	-1.15269	0.249036	0.587163	0.129932	0.431679	-0.300991	0.763421	0.902525	0.30098	0.43317	-0.694832	0.487161	0.762819	-0.669345	0.432562	-1.5474	0.121768	0.580269	-0.669892	0.432956	-1.54725	0.121803	0.264161	-0.243037	0.432864	-0.561463	0.574482	0.720177	0.575175	0.433684	1.32626	0.184755	0.357733	0.552134	0.432734	1.27592	0.201984	0.367536	0.296875	0.433309	0.685135	0.493259	1	-0.556787
Apobec3b	ENSRNOG00000016852	apolipoprotein B mRNA editing enzyme, catalytic polypeptide-like 3B [Source:RGD Symbol;Acc:1307800]	21.4454	-0.721374	0.402447	-1.79247	0.0730574	0.333399	1.12445	0.403099	-2.78951	0.00527872	0.0421527	-0.23662	0.403103	0.586995	0.557207	0.808931	0.639696	0.403755	1.58437	0.11311	0.568479	0.0305802	0.405137	0.0754811	0.939832	0.969046	-0.447614	0.403093	-1.11045	0.266805	0.433813	-0.373509	0.404195	-0.92408	0.355445	0.552719	0.215234	0.403946	0.532828	0.594153	0.747039	-0.0585259	0.404591	-0.144654	0.884984	1	-0.646256
Apobec4	ENSRNOG00000028089	apolipoprotein B mRNA editing enzyme, catalytic polypeptide-like 4 (putative) [Source:RGD Symbol;Acc:1560256]	1.34984	0.144095	0.101485	1.41986	0.155647	NA	-0.144102	0.101495	1.4198	0.155666	NA	0	0.101346	0	1	NA	0	0.101356	0	1	NA	0	0.101527	0	1	NA	0.144311	0.101782	1.41784	0.156239	NA	-0.0174837	0.101638	-0.17202	0.863422	NA	0	0.101557	0	1	NA	0	0.101854	0	1	1	0
Apobr	ENSRNOG00000017403	apolipoprotein B receptor [Source:RGD Symbol;Acc:1565169]	94.6946	-0.323076	0.451474	-0.715603	0.474236	0.771243	0.322222	0.451462	-0.713729	0.475395	0.716551	-0.384746	0.45165	0.851869	0.394287	0.692831	0.383892	0.451638	0.849999	0.395326	0.818327	0.118718	0.451195	0.263119	0.792459	0.889448	0.132412	0.451321	0.293389	0.769225	0.863819	-0.062522	0.451439	-0.138495	0.889849	0.942836	0.384554	0.451295	0.852112	0.394152	0.573661	-0.0709342	0.451142	-0.157233	0.875062	1	-0.335916
Apoc1	ENSRNOG00000018426	apolipoprotein C-I [Source:RGD Symbol;Acc:2134]	824.16	0.0126424	0.210865	0.0599549	0.952192	0.99127	-1.14813	0.212499	5.40301	6.55326e-08	5.13475e-06	-1.30915	0.212879	6.14973	7.76167e-10	1.37169e-07	0.173654	0.214496	0.809591	0.418175	0.832569	1.31416	0.216532	6.06914	1.28599e-09	2.51374e-08	1.64712	0.212158	7.76365	8.25198e-15	2.57034e-13	1.59462	0.217976	7.31557	2.56286e-13	8.2993e-12	1.73868	0.212712	8.17387	2.9866e-16	1.02275e-14	0.104202	0.213993	0.486939	0.626301	1	0.815174
Apoc2	ENSRNOG00000018402	apolipoprotein C-II [Source:RGD Symbol;Acc:2135]	2.61621	0.334285	0.204648	1.63347	0.102371	NA	-0.291961	0.204786	1.42569	0.153958	NA	0	0.203716	0	1	NA	0.0428878	0.203854	0.210384	0.833368	NA	0.0139595	0.204662	0.0682075	0.94562	NA	0.217645	0.206131	1.05586	0.291032	NA	-0.0664655	0.20508	-0.324095	0.745866	NA	-0.0982905	0.2048	-0.479933	0.631275	NA	0.0183498	0.206283	0.0889547	0.929118	1	0.0882753
Apoc3	ENSRNOG00000047503	apolipoprotein C-III [Source:RGD Symbol;Acc:2136]	2.4148	0	0.186064	0	1	NA	0	0.186098	0	1	NA	0.0803671	0.185916	-0.432277	0.66554	NA	-0.0804175	0.185949	-0.43247	0.6654	NA	0	0.186434	0	1	NA	-0.0119476	0.187158	-0.0638369	0.9491	NA	0.0100305	0.187042	0.0536272	0.957232	NA	-0.102164	0.186671	-0.547292	0.584178	NA	-0.0910565	0.187764	-0.484952	0.62771	1	0.0124563
Apoc4	ENSRNOG00000018405	apolipoprotein C-IV [Source:RGD Symbol;Acc:70959]	36.884	-0.512933	0.45709	-1.12217	0.26179	0.600767	-0.115852	0.456695	0.253676	0.799746	0.921463	-0.0840037	0.457226	0.183725	0.854229	0.962397	-0.544782	0.456831	-1.19252	0.233057	0.692485	0.260181	0.456603	0.56982	0.5688	0.733678	0.259095	0.457047	0.566889	0.57079	0.717884	1.17367	0.456839	2.56912	0.0101957	0.0399368	0.811181	0.457112	1.77458	0.0759676	0.180206	0.0391536	0.457069	0.0856622	0.931735	1	0.116939
Apod	ENSRNOG00000048273	apolipoprotein D [Source:RGD Symbol;Acc:2137]	8237.38	0.0569983	0.188576	0.302256	0.762457	0.922688	-0.49362	0.188707	2.61581	0.00890173	0.0607659	-0.195166	0.188678	1.03439	0.300955	0.60308	-0.241455	0.188808	-1.27884	0.200954	0.659399	-0.702254	0.188628	-3.72296	0.000196904	0.0013433	-0.000244236	0.188419	-0.00129624	0.998966	0.999939	-0.254011	0.188526	-1.34735	0.177868	0.348474	0.217958	0.188563	1.15589	0.247727	0.422404	0.2752	0.188406	1.46067	0.144105	1	-0.208391
Apoe	ENSRNOG00000018454	apolipoprotein E [Source:RGD Symbol;Acc:2138]	121180	0.15377	0.148131	1.03807	0.299238	0.633238	-0.35	0.148135	2.36271	0.0181417	0.0994836	-0.246755	0.148141	1.66568	0.0957778	0.325766	0.050525	0.148144	0.341052	0.733064	0.956501	0.063005	0.148137	0.425314	0.670608	0.810477	0.565676	0.148126	3.81888	0.00013406	0.000806585	0.31246	0.148139	2.10923	0.0349244	0.106164	0.471686	0.148136	3.18415	0.00145178	0.00698848	0.0597804	0.148131	0.403565	0.686532	1	-0.152671
Apof	#N/A	#N/A	0.263636	0	0.0998606	0	1	NA	0	0.0998606	0	1	NA	0.032515	0.0998606	-0.325604	0.744724	NA	-0.0327084	0.0998606	-0.327541	0.743259	NA	0	0.0998606	0	1	NA	0	0.0998606	0	1	NA	-0.0453437	0.0998606	-0.454071	0.649778	NA	0	0.0998606	0	1	NA	0	0.0998606	0	1	1	0
Apoh	ENSRNOG00000003566	apolipoprotein H (beta-2-glycoprotein I) [Source:RGD Symbol;Acc:1310625]	0.678902	0	0.100055	0	1	NA	0	0.100055	0	1	NA	0	0.0999025	0	1	NA	0	0.0999025	0	1	NA	0	0.10024	0	1	NA	0	0.100537	0	1	NA	0	0.100361	0	1	NA	0	0.100319	0	1	NA	0	0.1008	0	1	1	0
Apol3	ENSRNOG00000042771	apolipoprotein L, 3 [Source:RGD Symbol;Acc:1306480]	88.7034	-0.0862663	0.456675	-0.188901	0.850171	0.958269	0.892226	0.456277	-1.95545	0.0505305	0.193516	0.653919	0.456418	-1.43272	0.151938	0.42395	0.15204	0.456019	0.333408	0.738826	0.957654	-0.0387813	0.455829	-0.0850786	0.932199	0.966223	-0.0324349	0.456352	-0.0710743	0.943339	0.968304	0.251125	0.455936	0.550789	0.581778	0.747002	-0.116549	0.456429	-0.255351	0.798452	0.886992	-0.170381	0.456105	-0.373556	0.708734	1	-0.898572
Apol9a	ENSRNOG00000023410	apolipoprotein L 9a [Source:RGD Symbol;Acc:1562332]	74.1809	0.0461458	0.460352	0.10024	0.920154	0.982754	0.223061	0.460397	-0.484498	0.628032	0.824844	0.222741	0.460353	-0.483849	0.628493	0.852366	0.0464659	0.460397	0.100926	0.919609	0.994668	-0.308676	0.460468	-0.670353	0.502633	0.678998	0.422943	0.4604	0.918642	0.358283	0.53107	-0.098361	0.460468	-0.213611	0.830851	0.910643	-0.0345483	0.460389	-0.0750417	0.940182	0.968832	-0.411345	0.460436	-0.893382	0.371653	1	-0.95468
Apold1	ENSRNOG00000007830	apolipoprotein L domain containing 1 [Source:RGD Symbol;Acc:1303123]	35.6781	0.123803	0.412266	0.300299	0.763949	0.923379	-0.775828	0.411528	1.88524	0.0593975	0.214453	-0.952349	0.410912	2.31765	0.0204685	0.126954	0.300325	0.410172	0.732191	0.464052	0.856718	0.13879	0.410926	0.33775	0.735552	0.853047	0.325388	0.412652	0.788529	0.430387	0.598581	-0.826011	0.411326	-2.00816	0.0446258	0.128008	0.547914	0.412008	1.32986	0.183563	0.343969	0.34633	0.412394	0.839803	0.401019	1	0.589231
Apom	ENSRNOG00000000850	apolipoprotein M [Source:RGD Symbol;Acc:620773]	15.9351	0.554087	0.418278	1.32469	0.185275	0.518288	-0.580332	0.418254	1.38751	0.165287	0.400363	-0.589318	0.415158	1.4195	0.155752	0.429993	0.563073	0.415134	1.35637	0.174983	0.638506	-0.195919	0.418013	-0.468691	0.639291	0.787576	0.632089	0.419605	1.50639	0.131967	0.261936	-0.48239	0.416379	-1.15854	0.246646	NA	-0.00191004	0.417937	-0.00457017	0.996354	0.99919	-0.0799119	0.419266	-0.1906	0.848839	1	-0.247676
Apoo	ENSRNOG00000046918	apolipoprotein O [Source:RGD Symbol;Acc:1565289]	1340.69	-0.341012	0.227328	-1.50009	0.133592	0.447075	0.564549	0.226997	-2.48704	0.0128812	0.0778986	0.340022	0.226677	-1.50003	0.133607	0.393575	-0.116485	0.226345	-0.514635	0.606808	0.913316	-0.220314	0.225888	-0.975322	0.3294	0.522296	-0.814257	0.226132	-3.6008	0.000317234	0.00172133	-0.206702	0.225451	-0.916838	0.359228	0.556203	-0.374095	0.226192	-1.65388	0.0981517	0.218139	0.0991506	0.22499	0.440689	0.659438	1	0.0293948
Apool	ENSRNOG00000004512	apolipoprotein O-like [Source:RGD Symbol;Acc:1549725]	138.112	0.572114	0.432886	1.32163	0.186293	0.518288	-0.491737	0.432723	1.13638	0.255797	0.513263	-0.394865	0.434516	0.908745	0.363485	0.666101	0.475241	0.434354	1.09413	0.273897	0.729685	-0.566515	0.432452	-1.31001	0.190194	0.362878	-0.0453596	0.431346	-0.105158	0.91625	0.95239	-1.11624	0.432939	-2.57829	0.00992913	0.039193	-0.792533	0.432428	-1.83275	0.0668391	0.163361	-0.17506	0.430883	-0.406282	0.684536	1	-0.029418
Apopt1	ENSRNOG00000058920	apoptogenic 1, mitochondrial [Source:RGD Symbol;Acc:1304719]	14.6485	-0.0249802	0.459652	-0.0543458	0.95666	0.992898	0.154215	0.459796	-0.335399	0.737324	0.888557	0.0395833	0.459564	-0.0861323	0.931361	0.991704	0.0896518	0.459708	0.195019	0.845378	0.980879	0.681989	0.459523	1.48412	0.137776	0.289243	0.316649	0.459956	0.688433	0.49118	0.653423	0.329592	0.459881	0.71669	0.473566	NA	0.887431	0.459095	1.933	0.053236	0.137386	0.545802	0.459406	1.18806	0.234809	1	0.211124
App	ENSRNOG00000006997	amyloid beta (A4) precursor protein [Source:RGD Symbol;Acc:2139]	14568.9	0.00196741	0.137239	0.0143356	0.988562	1	-0.191779	0.137303	1.39676	0.162487	0.396079	0.0923695	0.137263	-0.67294	0.500986	0.772446	-0.282181	0.137327	-2.05482	0.0398967	0.381427	-1.23201	0.137066	-8.98846	2.5072e-19	1.64072e-17	-1.01274	0.136888	-7.39833	1.37909e-13	3.71211e-12	-0.929469	0.136914	-6.78869	1.13159e-11	2.92347e-10	-1.06198	0.136988	-7.75236	9.01997e-15	2.69245e-13	-0.0472662	0.136636	-0.345928	0.729397	1	-0.02749
Appbp2	ENSRNOG00000027654	amyloid beta precursor protein (cytoplasmic tail) binding protein 2 [Source:RGD Symbol;Acc:1306488]	1325.01	-0.0565727	0.215229	-0.26285	0.792667	0.934636	0.362946	0.214841	-1.68937	0.091149	0.279496	0.0373988	0.215317	-0.173691	0.862108	0.965438	0.268974	0.21493	1.25145	0.210771	0.668824	0.322828	0.214567	1.50455	0.132439	0.280759	-0.138786	0.214429	-0.647235	0.51748	0.674721	-0.0222562	0.214563	-0.103728	0.917385	0.958839	-0.101713	0.214761	-0.473609	0.635779	0.778446	-0.0194994	0.213959	-0.0911359	0.927385	1	0.0986678
Appl2	ENSRNOG00000008174	adaptor protein, phosphotyrosine interaction, PH domain and leucine zipper containing 2 [Source:RGD Symbol;Acc:1563028]	491.273	-0.877122	0.270165	-3.24662	0.00116784	0.0367155	-0.428522	0.273443	1.56714	0.117083	0.323667	-0.557185	0.269835	2.06491	0.0389315	0.190148	-0.748459	0.273118	-2.74042	0.00613599	0.167726	-0.884618	0.272174	-3.2502	0.00115326	0.00619649	-0.600197	0.269587	-2.22635	0.0259904	0.0746702	0.103633	0.269843	0.384049	0.700942	0.833038	0.579082	0.268953	2.1531	0.031311	0.090441	0.302157	0.268373	1.12589	0.260214	1	0.144101
Aprt	ENSRNOG00000014405	adenine phosphoribosyl transferase [Source:RGD Symbol;Acc:1307758]	2149.23	-0.00337533	0.171703	-0.019658	0.984316	0.999928	0.391721	0.171356	-2.286	0.022254	0.114316	0.135022	0.171729	-0.786249	0.431721	0.723813	0.253323	0.171383	1.47812	0.139377	0.602467	0.811152	0.171516	4.7293	2.25295e-06	2.39857e-05	0.685106	0.171701	3.9901	6.60451e-05	0.000434938	0.663532	0.17161	3.86652	0.0001104	0.000837536	0.695118	0.172018	4.04096	5.32333e-05	0.000384452	0.00663685	0.172017	0.0385826	0.969223	1	-0.265675
Aptr	NA	NA	49.3113	-0.287313	0.453221	-0.633936	0.526123	0.804348	-0.31009	0.45392	0.683139	0.494519	0.729803	-0.61945	0.453808	1.365	0.172252	0.452776	0.0220466	0.454502	0.0485072	0.961312	0.999581	-0.33215	0.453683	-0.732119	0.464096	0.648657	0.197128	0.453018	0.435144	0.663458	0.788969	-0.255723	0.453529	-0.563851	0.572855	0.741373	0.553989	0.45315	1.22253	0.221508	0.390976	0.0695481	0.452948	0.153545	0.877968	1	-0.219188
Aptx	ENSRNOG00000006582	aprataxin [Source:RGD Symbol;Acc:628740]	202.973	0.444553	0.407265	1.09156	0.275028	0.612241	-0.364684	0.407076	0.895862	0.370327	0.627997	-1.33203	0.411922	3.23369	0.00122202	0.0187873	1.4119	0.411737	3.42912	0.000605537	0.051806	-0.454889	0.406727	-1.11841	0.26339	0.450942	-0.244266	0.405444	-0.602464	0.546865	0.700297	-1.77815	0.410378	-4.33294	1.47129e-05	0.000138038	-0.937437	0.406491	-2.30617	0.0211012	0.0656576	-0.248618	0.404665	-0.614381	0.538963	1	0.15406
Aqp1	ENSRNOG00000011648	aquaporin 1 [Source:RGD Symbol;Acc:2141]	87.5728	0.780178	0.453432	1.72061	0.085322	0.361001	-0.24622	0.452821	0.543747	0.586616	0.797075	0.0120482	0.454289	-0.0265211	0.978842	1	0.52191	0.453685	1.15038	0.249987	0.708795	-0.635517	0.452461	-1.40458	0.160147	0.321442	-0.59384	0.451858	-1.31422	0.188773	0.340084	-0.517182	0.45318	-1.14123	0.253774	0.443879	-0.755882	0.453234	-1.66775	0.0953651	0.213059	0.618136	0.451657	1.3686	0.171126	1	0.204543
Aqp11	ENSRNOG00000013358	aquaporin 11 [Source:RGD Symbol;Acc:628763]	297.11	0.758295	0.355399	2.13364	0.0328719	0.229855	-0.324807	0.353983	0.917576	0.358841	0.620106	0.539089	0.356192	-1.51348	0.130158	0.387708	-0.105601	0.35478	-0.297651	0.76597	0.964937	-0.599466	0.35322	-1.69714	0.0896695	0.211168	-0.207229	0.351733	-0.589165	0.555751	0.706902	-0.543623	0.352438	-1.54247	0.122961	0.269062	-1.09832	0.354432	-3.09882	0.00194292	0.00900126	-0.132798	0.350752	-0.37861	0.704978	1	-0.0674302
Aqp12a	ENSRNOG00000004452	aquaporin 12A [Source:RGD Symbol;Acc:1562727]	1.93492	-0.141992	0.101899	-1.39346	0.16348	NA	0	0.101854	0	1	NA	-0.141952	0.101843	1.39383	0.163369	NA	0	0.101798	0	1	NA	-0.0393282	0.10193	-0.385836	0.699618	NA	-0.0154062	0.102061	-0.15095	0.880015	NA	0	0.101994	0	1	NA	0.14206	0.101992	1.39286	0.163663	NA	0.0154739	0.102154	0.151476	0.879601	1	-0.0239966
Aqp2	ENSRNOG00000054378	aquaporin 2 (collecting duct) [Source:RGD Symbol;Acc:2142]	1.48469	-0.0463175	0.101593	-0.455913	0.648452	NA	0	0.101579	0	1	NA	-0.0462659	0.101522	0.455725	0.648588	NA	0	0.101508	0	1	NA	0	0.101662	0	1	NA	-0.0318275	0.101848	-0.312501	0.75466	NA	-0.0514734	0.101772	-0.505769	0.613019	NA	0.0464033	0.101711	0.456227	0.648227	NA	0.0319134	0.101966	0.312981	0.754295	1	0.0318879
Aqp3	ENSRNOG00000009797	aquaporin 3 [Source:RGD Symbol;Acc:68428]	0	NA	NA	NA	NA	NA	NA	NA	NA	NA	NA	NA	NA	NA	NA	NA	NA	NA	NA	NA	NA	NA	NA	NA	NA	NA	NA	NA	NA	NA	NA	NA	NA	NA	NA	NA	NA	NA	NA	NA	NA	NA	NA	NA	NA	NA	NA
Aqp4	ENSRNOG00000016043	aquaporin 4 [Source:RGD Symbol;Acc:2143]	3764.02	-0.316594	0.226974	-1.39484	0.163063	0.490614	-0.13459	0.227134	0.592559	0.553476	0.773726	-0.575547	0.227132	2.53398	0.0112777	0.0867073	0.124364	0.227292	0.547154	0.584273	0.90549	0.142384	0.227149	0.626832	0.53077	0.703962	0.041768	0.22688	0.184097	0.853937	0.914784	-0.00445083	0.227106	-0.019598	0.984364	0.991704	0.198361	0.22685	0.874412	0.381894	0.563636	-0.160001	0.226757	-0.705606	0.480433	1	0.235206
Aqp5	ENSRNOG00000051970	aquaporin 5 [Source:RGD Symbol;Acc:2144]	4.32896	-0.0224234	0.190704	-0.117582	0.906399	NA	0	0.190699	0	1	NA	-0.0221511	0.19053	0.11626	0.907446	0.985572	0	0.190525	0	1	NA	-0.0906251	0.190977	-0.474534	0.635119	NA	-0.226045	0.191493	-1.18044	0.237827	NA	0	0.191135	0	1	NA	-0.105949	0.19109	-0.554447	0.579273	NA	0.0976722	0.191878	0.509034	0.610729	1	0.134922
Aqp8	ENSRNOG00000014652	aquaporin 8 [Source:RGD Symbol;Acc:2146]	0.124701	0	0.0998606	0	1	NA	0	0.0998606	0	1	NA	0	0.0998606	0	1	NA	0	0.0998606	0	1	NA	0	0.0998606	0	1	NA	0	0.0998606	0	1	NA	0	0.0998606	0	1	NA	0	0.0998606	0	1	NA	0	0.0998606	0	1	1	0
Aqp9	ENSRNOG00000061883	aquaporin 9 [Source:RGD Symbol;Acc:68433]	97.1536	0.676942	0.421493	1.60606	0.108261	0.406562	-0.144638	0.420194	0.344219	0.730682	0.884942	-0.00512313	0.423175	0.0121064	0.990341	1	0.537427	0.421885	1.27387	0.20271	0.661914	0.386028	0.420692	0.917601	0.358828	0.549981	0.235994	0.419224	0.562931	0.573482	0.719728	0.0671386	0.421819	0.159164	0.873539	0.934305	-0.182666	0.42174	-0.433126	0.664923	0.799568	0.258282	0.419473	0.61573	0.538073	1	0.294672
Aqr	ENSRNOG00000008912	aquarius intron-binding spliceosomal factor [Source:RGD Symbol;Acc:1306223]	427.646	-0.882142	0.290811	-3.03338	0.00241829	0.0554135	0.447801	0.291512	-1.53613	0.124506	0.335537	-0.466317	0.290331	1.60616	0.10824	0.350326	0.0319762	0.291034	0.109871	0.912512	0.994357	0.565111	0.291284	1.94007	0.0523712	0.141169	-0.127175	0.290908	-0.437165	0.661992	0.788348	0.419708	0.290694	1.44381	0.148792	0.307594	0.97501	0.29033	3.35828	0.000784294	0.0041408	0.220043	0.290427	0.757652	0.448659	1	0.244485
Ar	ENSRNOG00000005639	androgen receptor [Source:RGD Symbol;Acc:2147]	175.053	0.525492	0.397606	1.32164	0.186288	0.518288	-0.80756	0.398181	2.02812	0.0425476	0.173431	-0.745126	0.400339	1.86124	0.0627106	0.253927	0.463057	0.400907	1.15502	0.248081	0.706196	0.188629	0.399319	0.472377	0.636658	0.785934	0.472936	0.396431	1.19298	0.232875	0.394407	-0.229647	0.400074	-0.574011	0.565961	0.736533	-0.31442	0.397468	-0.791057	0.42891	0.607185	-0.261864	0.396292	-0.660786	0.50875	1	0.523253
Araf	ENSRNOG00000010838	A-Raf proto-oncogene, serine/threonine kinase [Source:RGD Symbol;Acc:2148]	5563.23	-0.389817	0.161157	-2.41886	0.0155691	0.154215	0.214064	0.161238	-1.32763	0.184302	0.42974	-0.0151423	0.16106	0.0940166	0.925096	0.989525	-0.16061	0.161142	-0.996704	0.318908	0.766076	-0.256939	0.160955	-1.59634	0.110413	0.245609	-0.411031	0.160884	-2.55482	0.0106242	0.036231	-0.212294	0.160747	-1.32067	0.186611	0.359706	-0.132007	0.160826	-0.820803	0.411758	0.591627	-0.110793	0.160553	-0.69007	0.49015	1	-0.0599721
Arap2	ENSRNOG00000056826	ArfGAP with RhoGAP domain, ankyrin repeat and PH domain 2 [Source:RGD Symbol;Acc:1306452]	763.284	-0.0734681	0.231442	-0.317437	0.750912	0.917942	0.628897	0.230484	-2.72859	0.00636058	0.047676	0.183025	0.231302	-0.791281	0.42878	0.721427	0.372404	0.230344	1.61673	0.105936	0.556351	0.657607	0.230164	2.85712	0.004275	0.0188416	0.434486	0.231097	1.88011	0.0600934	0.145034	0.0583217	0.230079	0.253486	0.799893	0.893185	0.406664	0.231435	1.75714	0.0788934	0.185469	-0.101291	0.23109	-0.438317	0.661157	1	-0.405776
Arc	ENSRNOG00000043465	activity-regulated cytoskeleton-associated protein [Source:RGD Symbol;Acc:62037]	3283.34	-0.90814	0.284869	-3.18792	0.00143299	0.0415203	1.11165	0.28479	-3.90339	9.48563e-05	0.002042	0.968952	0.28429	-3.40832	0.000653654	0.0120468	-0.765446	0.284212	-2.69322	0.00707647	0.182263	0.0159081	0.284289	0.0559576	0.955376	0.975596	-0.0522815	0.284936	-0.183485	0.854417	0.915143	0.0177712	0.283917	0.062593	0.950091	0.97591	0.199027	0.284439	0.699718	0.484104	0.655467	-0.656831	0.284506	-2.30867	0.020962	1	-1.04346
Arcn1	ENSRNOG00000061108	archain 1 [Source:RGD Symbol;Acc:1359110]	2668.17	0.214559	0.172743	1.24207	0.214211	0.552067	-0.295552	0.172807	1.7103	0.0872098	0.272315	-0.301346	0.17334	1.73847	0.0821279	0.297705	0.220353	0.173403	1.27076	0.203816	0.662409	-0.346438	0.172634	-2.00678	0.0447733	0.125434	-0.0156239	0.172074	-0.0907979	0.927653	0.959708	-0.453923	0.172733	-2.62789	0.00859155	0.0346343	-0.357034	0.172466	-2.07017	0.0384363	0.106577	-0.126851	0.171795	-0.738383	0.460282	1	-0.0352618
Areg	ENSRNOG00000002754	amphiregulin [Source:RGD Symbol;Acc:2149]	2.3512	-0.329661	0.182968	-1.80173	0.0715873	NA	0.215053	0.182814	-1.17635	0.239455	NA	-0.329246	0.182686	1.80225	0.0715063	NA	0.214638	0.182531	1.1759	0.239636	NA	0.202037	0.183162	1.10305	0.270007	NA	-0.0795549	0.183561	-0.433398	0.664726	NA	0	0.183141	0	1	NA	0.28297	0.183498	1.54209	0.123052	NA	0.0328643	0.18409	0.178524	0.858312	1	0.066539
Arel1	ENSRNOG00000004382	apoptosis resistant E3 ubiquitin protein ligase 1 [Source:RGD Symbol;Acc:1307597]	793.589	0.0646065	0.257094	0.251296	0.801586	0.939388	0.0775052	0.256801	-0.301811	0.762796	0.902182	-0.222585	0.257896	0.86308	0.388094	0.687213	0.364697	0.257604	1.41573	0.156856	0.618697	0.0131138	0.256403	0.0511453	0.95921	0.977634	-0.28568	0.255647	-1.11748	0.263791	0.430559	-0.708738	0.256361	-2.76461	0.00569914	0.0248216	-0.557327	0.256148	-2.1758	0.0295703	0.0864051	-0.20704	0.254696	-0.812892	0.41628	1	0.221289
Arf1	ENSRNOG00000060229	ADP-ribosylation factor 1 [Source:RGD Symbol;Acc:621270]	5214.93	0.0597596	0.210085	0.284454	0.776062	0.928514	-0.0312154	0.210038	0.148618	0.881855	0.95781	0.388622	0.209966	-1.85088	0.0641861	0.256844	-0.360078	0.209918	-1.71532	0.0862859	0.515422	-2.12899	0.209109	-10.1812	2.40529e-24	3.08107e-22	-2.07361	0.208791	-9.93154	3.03519e-23	2.56286e-21	-1.75638	0.208674	-8.41687	3.86685e-17	2.07556e-15	-2.21207	0.209132	-10.5774	3.79295e-26	3.36399e-24	-0.0787007	0.207831	-0.378676	0.704928	1	-0.0241581
Arf2	ENSRNOG00000004807	ADP-ribosylation factor 2 [Source:RGD Symbol;Acc:621271]	934.905	0.0296448	0.236433	0.125383	0.90022	0.976536	0.0224285	0.236261	-0.0949309	0.92437	0.97561	0.441178	0.235991	-1.86947	0.0615575	0.251076	-0.389105	0.235818	-1.65002	0.0989387	0.540871	-0.965583	0.234602	-4.11584	3.85771e-05	0.000313432	-0.874306	0.233956	-3.73706	0.000186185	0.00106957	-0.523736	0.233485	-2.24312	0.0248889	0.081632	-0.95668	0.234735	-4.07558	4.59005e-05	0.000335425	-0.0527289	0.232237	-0.227048	0.820387	1	-0.113706
Arf3	ENSRNOG00000057515	ADP-ribosylation factor 3 [Source:MGI Symbol;Acc:MGI:99432]	29927.7	-0.00933553	0.0965084	-0.0967328	0.922939	0.983476	-0.0682312	0.096518	0.706927	0.479612	0.719161	-0.129394	0.0965493	1.34018	0.180186	0.463874	0.051827	0.0965589	0.53674	0.591447	0.908577	0.0171643	0.0965005	0.177868	0.858827	0.927207	-0.111784	0.0964124	-1.15944	0.246278	0.410467	-0.056713	0.0964739	-0.587859	0.556627	0.729989	-0.226616	0.0964482	-2.34962	0.0187927	0.0595876	-0.124168	0.0963522	-1.28869	0.197507	1	0.19718
Arf4	ENSRNOG00000012623	ADP-ribosylation factor 4 [Source:RGD Symbol;Acc:621275]	3826.8	-0.182713	0.166731	-1.09585	0.273143	0.610982	0.0546507	0.166809	-0.327624	0.743196	0.892387	-0.0416926	0.16675	0.25003	0.802564	0.938065	-0.0863697	0.166828	-0.517717	0.604656	0.912339	-0.354856	0.16649	-2.13139	0.033057	0.0990918	-0.384052	0.16628	-2.30967	0.0209065	0.0629241	-0.355701	0.166271	-2.13929	0.0324123	0.100372	-0.216231	0.166375	-1.29966	0.193717	0.357667	-0.0148925	0.165923	-0.0897559	0.928481	1	-0.0254552
Arf5	ENSRNOG00000007806	ADP-ribosylation factor 5 [Source:RGD Symbol;Acc:621278]	11995.6	-0.0419335	0.13576	-0.30888	0.757413	0.919802	0.395549	0.13569	-2.9151	0.00355577	0.0318806	0.279436	0.135735	-2.05869	0.0395239	0.19198	0.07418	0.135665	0.546789	0.584524	0.905509	1.04387	0.135776	7.68821	1.49204e-14	5.64958e-13	0.890893	0.135817	6.55953	5.39769e-11	1.02848e-09	0.991315	0.135747	7.30267	2.82115e-13	9.08564e-12	1.00368	0.135898	7.38558	1.51786e-13	4.02413e-12	0.0708576	0.135954	0.521187	0.602237	1	-0.24257
Arf6	ENSRNOG00000004791	ADP-ribosylation factor 6 [Source:RGD Symbol;Acc:621279]	1051.03	0.439364	0.242923	1.80865	0.0705048	0.329217	0.510135	0.240776	-2.11871	0.0341147	0.150277	0.804938	0.242597	-3.31801	0.000906628	0.0151901	0.144561	0.240446	0.601221	0.547693	0.89146	-0.776666	0.239057	-3.24888	0.00115861	0.00621695	-1.00561	0.239507	-4.19866	2.68494e-05	0.00019551	-0.869054	0.239045	-3.63552	0.000277425	0.0018807	-1.33551	0.24142	-5.53189	3.16794e-08	4.23124e-07	0.109462	0.23798	0.459963	0.645543	1	-0.281192
Arfgap1	ENSRNOG00000043150	ADP-ribosylation factor GTPase activating protein 1 [Source:RGD Symbol;Acc:708452]	561.999	0.105842	0.275216	0.384577	0.700551	0.897324	-0.181766	0.275328	0.66018	0.509138	0.740831	-0.125263	0.275872	0.454061	0.649785	0.865862	0.0493378	0.275984	0.178771	0.858118	0.983899	0.0239322	0.275295	0.0869327	0.930725	0.965776	0.301538	0.27442	1.09882	0.271847	0.439378	-0.0528437	0.274961	-0.192186	0.847597	0.920501	0.158356	0.275114	0.575602	0.564884	0.723709	-0.03734	0.274319	-0.136119	0.891727	1	-0.0958395
Arfgap2	ENSRNOG00000014429	ADP-ribosylation factor GTPase activating protein 2 [Source:RGD Symbol;Acc:1306177]	1275.25	-0.118849	0.231327	-0.51377	0.607413	0.849958	-0.109853	0.231594	0.474333	0.635262	0.829589	0.262524	0.231126	-1.13585	0.25602	0.556013	-0.491226	0.231394	-2.1229	0.0337623	0.356354	-0.317519	0.231207	-1.37331	0.169656	0.334944	0.0142985	0.230781	0.0619571	0.950597	0.972609	0.334357	0.230558	1.45021	0.147	0.305405	-0.0908012	0.230858	-0.393321	0.694083	0.81921	-0.223948	0.230311	-0.972374	0.330864	1	-0.221964
Arfgap3	ENSRNOG00000046472	ADP-ribosylation factor GTPase activating protein 3 [Source:RGD Symbol;Acc:1560066]	609.933	-0.273766	0.274559	-0.997111	0.318711	0.649669	-0.00833544	0.274949	0.0303163	0.975815	0.99732	-0.432991	0.275044	1.57426	0.115427	0.363658	0.15089	0.275433	0.547827	0.583811	0.90549	0.433505	0.275248	1.57496	0.115265	0.25334	0.419024	0.274563	1.52615	0.126973	0.255187	0.166988	0.27497	0.607296	0.543655	0.720074	0.48271	0.274398	1.75916	0.0785509	0.18491	-0.21008	0.274402	-0.765592	0.443919	1	0.0228157
Arfgef1	ENSRNOG00000005703	ADP-ribosylation factor guanine nucleotide-exchange factor 1(brefeldin A-inhibited) [Source:RGD Symbol;Acc:1560793]	1652.54	0.12719	0.22528	0.564588	0.572354	0.829727	0.0668318	0.225107	-0.296889	0.766551	0.904842	0.195153	0.225349	-0.866	0.38649	0.686609	-0.00113037	0.225176	-0.00501995	0.995995	1	0.406623	0.225181	1.80576	0.0709564	0.176818	0.660596	0.22515	2.93403	0.00334597	0.0134933	0.451067	0.225042	2.00437	0.0450306	0.128949	0.394997	0.225407	1.75237	0.07971	0.186996	-0.138408	0.225277	-0.61439	0.538958	1	-0.320805
Arfgef2	ENSRNOG00000007485	ADP-ribosylation factor guanine nucleotide-exchange factor 2 (brefeldin A-inhibited) [Source:RGD Symbol;Acc:631430]	197.831	0.61063	0.376495	1.62188	0.104829	0.403127	0.691453	0.372972	-1.8539	0.0637531	0.22365	0.842058	0.37637	-2.23732	0.0252655	0.145905	0.460024	0.372844	1.23382	0.217269	0.672311	0.450225	0.372086	1.21	0.226278	0.408244	-0.0499035	0.37292	-0.133818	0.893546	0.939102	0.0934348	0.372705	0.250694	0.802051	0.89413	-0.769141	0.375581	-2.04787	0.0405727	0.111077	-0.108608	0.371994	-0.291962	0.770316	1	-0.191324
Arfip1	ENSRNOG00000010533	ADP-ribosylation factor interacting protein 1 [Source:RGD Symbol;Acc:708401]	209.467	0.383084	0.384323	0.996777	0.318873	0.64967	-1.26197	0.38663	3.26402	0.00109845	0.0132475	0.00387306	0.385161	-0.0100557	0.991977	1	-0.882755	0.38746	-2.27831	0.022708	0.306957	-1.05456	0.386603	-2.72776	0.00637663	0.0261962	0.31095	0.383118	0.811629	0.417004	0.586384	-0.151401	0.383901	-0.394376	0.693303	0.827977	0.0899213	0.384502	0.233864	0.81509	0.896141	0.162055	0.383298	0.422792	0.672447	1	-0.103544
Arfip2	ENSRNOG00000018440	ADP-ribosylation factor interacting protein 2 [Source:RGD Symbol;Acc:1303204]	1672.85	-0.109009	0.243389	-0.44788	0.65424	0.874698	-0.0399394	0.243508	0.164017	0.869718	0.951703	-0.475996	0.243878	1.95178	0.0509644	0.224477	0.327048	0.243997	1.34038	0.180123	0.643023	-0.367105	0.243161	-1.50972	0.131114	0.278685	-0.344912	0.242794	-1.42059	0.155435	0.294619	-0.684261	0.243313	-2.81226	0.00491943	0.0220045	-0.217424	0.242988	-0.894791	0.370899	0.553096	0.0184793	0.242393	0.076237	0.939231	1	0.0177461
Arfrp1	ENSRNOG00000013992	ADP-ribosylation factor related protein 1 [Source:RGD Symbol;Acc:621683]	910.257	-0.332938	0.243868	-1.36524	0.172179	0.502686	0.653518	0.243309	-2.68596	0.00723225	0.052164	0.383914	0.243018	-1.57978	0.114158	0.362028	-0.0633332	0.242457	-0.261214	0.793928	0.97195	-0.108492	0.24196	-0.448389	0.653873	0.797982	-0.689849	0.242483	-2.84494	0.00444196	0.0172203	-0.0925482	0.241552	-0.383141	0.701616	0.833179	-0.20848	0.242633	-0.859242	0.390207	0.570502	0.148432	0.24124	0.615286	0.538366	1	-0.0721609
Arg1	ENSRNOG00000013304	arginase 1 [Source:RGD Symbol;Acc:2150]	164.548	-1.34246	0.447177	-3.00208	0.00268145	0.0590262	-0.0609984	0.448014	0.136153	0.8917	0.962192	-1.23107	0.447222	2.75271	0.00591051	0.0566083	-0.172388	0.448058	-0.384746	0.700426	0.94839	0.114283	0.447976	0.255111	0.798638	0.892556	-0.761839	0.447138	-1.70381	0.0884162	0.195095	0.139957	0.447563	0.312709	0.754502	0.865857	0.498495	0.446575	1.11626	0.26431	0.440614	-0.0821271	0.446535	-0.183921	0.854076	1	0.93712
Arg2	ENSRNOG00000053811	arginase 2 [Source:RGD Symbol;Acc:2151]	399.188	0.361091	0.233575	1.54593	0.122121	0.428029	-0.585259	0.234253	2.4984	0.0124754	0.0763674	-0.55317	0.236652	2.33748	0.0194142	0.122356	0.329002	0.237321	1.38631	0.165651	0.629514	0.158735	0.235437	0.674214	0.500175	0.677427	0.800268	0.232868	3.43657	0.000589124	0.00298264	0.0213975	0.236413	0.0905087	0.927883	0.964135	0.239156	0.23413	1.02147	0.307032	0.487016	-0.200021	0.233425	-0.856896	0.391502	1	-0.056274
Arglu1	ENSRNOG00000024142	arginine and glutamate rich 1 [Source:RGD Symbol;Acc:1310061]	4496.12	0.370968	0.123034	3.01516	0.00256845	0.0575313	-0.418536	0.123051	3.40133	0.000670585	0.00914532	0.121075	0.123197	-0.982773	0.325719	0.630722	-0.168643	0.123213	-1.3687	0.171092	0.634924	1.26903	0.123886	10.2435	1.26545e-24	1.73151e-22	1.66172	0.123433	13.4625	2.60072e-41	1.39399e-38	1.45993	0.123664	11.8057	3.64937e-32	1.02139e-29	1.35642	0.123809	10.9558	6.23439e-28	6.86228e-26	0.0656747	0.124205	0.528759	0.596973	1	0.0258464
Arhgap1	ENSRNOG00000016610	Rho GTPase activating protein 1 [Source:RGD Symbol;Acc:1306068]	1075.87	0.223934	0.229204	0.97701	0.328564	0.659821	-0.312078	0.229323	1.36087	0.173556	0.412552	-0.522844	0.230662	2.26671	0.0234077	0.137892	0.434699	0.230781	1.8836	0.0596185	0.44988	-0.584043	0.228839	-2.55221	0.0107043	0.0402031	-0.180122	0.227923	-0.790276	0.429367	0.597784	-0.74344	0.229573	-3.23835	0.00120221	0.00660066	-0.632938	0.228535	-2.76954	0.00561351	0.0221877	-0.228881	0.227251	-1.00717	0.313851	1	-0.0918425
Arhgap10	ENSRNOG00000013152	Rho GTPase activating protein 10 [Source:RGD Symbol;Acc:1588859]	213.157	0.16401	0.421984	0.388666	0.697524	0.895861	0.429263	0.421452	-1.01854	0.308424	0.570159	0.131556	0.422151	-0.311632	0.75532	0.918156	0.461718	0.42162	1.09511	0.27347	0.729255	0.425776	0.421286	1.01066	0.31218	0.502938	0.773123	0.4219	1.83248	0.0668802	0.157497	-0.047358	0.421473	-0.112363	0.910536	0.955485	0.584544	0.422346	1.38404	0.166346	0.320976	-0.024569	0.422263	-0.058184	0.953602	1	-0.776611
Arhgap11a	ENSRNOG00000008115	Rho GTPase activating protein 11A [Source:RGD Symbol;Acc:1309107]	46.2058	0.345259	0.424467	0.813394	0.415992	0.726147	-0.029009	0.424737	0.0682987	0.945548	0.984982	-0.640337	0.423454	1.51217	0.130489	0.388338	0.956587	0.423724	2.25757	0.0239725	0.310109	0.3049	0.424675	0.717961	0.472781	0.65552	0.502985	0.424869	1.18386	0.236469	0.398468	-0.858218	0.424048	-2.02387	0.0429837	0.124538	0.140316	0.424378	0.33064	0.740917	0.851162	-0.0174103	0.42478	-0.0409865	0.967307	1	-0.169077
Arhgap12	ENSRNOG00000017791	Rho GTPase activating protein 12 [Source:RGD Symbol;Acc:1310017]	447.448	-0.625807	0.332725	-1.88086	0.0599914	0.309096	0.694451	0.332604	-2.08792	0.0368053	0.157446	-0.314215	0.332489	0.945036	0.34464	0.64804	0.382858	0.332369	1.15191	0.24936	0.707668	0.183862	0.331575	0.55451	0.57923	0.740944	-0.346656	0.33221	-1.04348	0.296724	0.465976	0.0161272	0.33207	0.0485656	0.961265	0.981334	0.224684	0.331697	0.677376	0.498167	0.668052	-0.0544675	0.331181	-0.164465	0.869365	1	-0.163933
Arhgap15	ENSRNOG00000031168	Rho GTPase activating protein 15 [Source:RGD Symbol;Acc:1359304]	236.327	-1.11789	0.360237	-3.10322	0.0019143	0.0492523	1.20358	0.360055	-3.34278	0.000829422	0.0107868	0.445444	0.357408	-1.24632	0.212648	0.505368	-0.359752	0.357224	-1.00707	0.313899	0.762756	0.186781	0.357414	0.52259	0.601259	0.759203	0.02886	0.36121	0.0798983	0.936318	0.964337	0.701144	0.35676	1.96531	0.0493784	0.137938	0.822824	0.358632	2.29434	0.021771	0.0674017	-0.323928	0.359611	-0.900773	0.367709	1	-1.04566
Arhgap17	ENSRNOG00000013836	Rho GTPase activating protein 17 [Source:RGD Symbol;Acc:628767]	151.753	-0.568594	0.3627	-1.56767	0.116958	0.420009	-0.0559199	0.3645	0.153415	0.878071	0.956163	0.13909	0.36141	-0.384853	0.700346	0.892822	-0.763604	0.363218	-2.10233	0.0355246	0.362526	-0.758698	0.362521	-2.09284	0.0363636	0.106739	-0.148108	0.362102	-0.409023	0.682522	0.802263	0.230468	0.360261	0.639726	0.522351	0.703107	0.628488	0.361977	1.73627	0.0825169	0.191829	0.208001	0.361376	0.57558	0.564899	1	-0.55467
Arhgap18	ENSRNOG00000011245	Rho GTPase activating protein 18 [Source:RGD Symbol;Acc:1305053]	116.185	-1.29434	0.455179	-2.84359	0.00446084	0.0785277	0.76678	0.455357	-1.68391	0.0921989	0.281143	-1.46393	0.455382	3.21472	0.00130573	0.019702	0.936365	0.45556	2.05542	0.0398389	0.381427	0.150938	0.454999	0.331732	0.740092	0.855882	-0.492567	0.455213	-1.08206	0.279226	0.447161	-0.538214	0.455469	-1.18167	0.237337	0.424448	0.595794	0.454761	1.31012	0.190154	0.352492	-0.20598	0.454796	-0.452906	0.650616	1	-0.123275
Arhgap20	ENSRNOG00000025624	Rho GTPase activating protein 20 [Source:RGD Symbol;Acc:1303160]	649.2	0.431731	0.212508	2.0316	0.0421944	0.26051	-0.282143	0.212098	1.33025	0.183436	0.428308	0.0759977	0.213493	-0.355972	0.721861	0.902763	0.0735906	0.213085	0.345358	0.729825	0.955732	0.39109	0.212905	1.83693	0.0662208	0.168269	0.829791	0.21182	3.91743	8.94973e-05	0.000566097	0.294593	0.212514	1.38623	0.165678	0.332118	0.0940615	0.21282	0.441976	0.658507	0.794876	-0.303998	0.212134	-1.43305	0.151843	1	-0.156558
Arhgap21	ENSRNOG00000008659	Rho GTPase activating protein 21 [Source:RGD Symbol;Acc:1311028]	2284.14	-0.00217526	0.199806	-0.0108869	0.991314	1	-0.294041	0.199961	1.4705	0.141427	0.364474	-0.622178	0.200232	3.10729	0.00188813	0.0252609	0.325961	0.200386	1.62666	0.103809	0.551542	1.60468	0.201226	7.97452	1.5297e-15	6.67358e-14	1.7247	0.200568	8.59909	8.0354e-18	3.6022e-16	0.881501	0.20081	4.38972	1.13498e-05	0.000110536	1.51013	0.200534	7.53052	5.05367e-14	1.41595e-12	-0.21675	0.201293	-1.07679	0.281574	1	0.174023
Arhgap22	ENSRNOG00000024728	Rho GTPase activating protein 22 [Source:RGD Symbol;Acc:1307237]	245.923	0.0161467	0.351695	0.0459111	0.963381	0.994093	0.167582	0.351205	-0.477164	0.633245	0.828602	-0.143418	0.352466	0.4069	0.684081	0.885544	0.327148	0.351977	0.929457	0.352652	0.787145	-0.143599	0.350259	-0.409978	0.681822	0.818771	0.0271162	0.350272	0.0774148	0.938294	0.965158	-0.283624	0.35086	-0.808369	0.418878	0.612783	-0.145493	0.35086	-0.414675	0.67838	0.808713	-0.156463	0.349433	-0.447762	0.654325	1	-0.338297
Arhgap24	ENSRNOG00000056944	Rho GTPase activating protein 24 [Source:RGD Symbol;Acc:1306669]	110.354	-0.0533028	0.436933	-0.121993	0.902905	0.97747	0.698556	0.436164	-1.60159	0.109246	0.311093	-0.077571	0.437183	0.177434	0.859168	0.964508	0.722824	0.436415	1.65628	0.0976659	0.538955	0.587296	0.435795	1.34764	0.177773	0.346763	-0.103918	0.436093	-0.238292	0.811654	0.890537	0.211526	0.436719	0.484352	0.628136	0.781265	-0.07112	0.436453	-0.16295	0.870558	0.929888	-0.0205051	0.435611	-0.047072	0.962456	1	-0.00734207
Arhgap25	ENSRNOG00000009347	Rho GTPase activating protein 25 [Source:RGD Symbol;Acc:1562105]	419.762	1.05773	0.343911	3.07559	0.00210085	0.0515235	-0.342844	0.342496	1.00102	0.316819	0.57948	1.35899	0.343791	-3.95295	7.71934e-05	0.00233773	-0.644105	0.342376	-1.88128	0.059934	0.450375	-0.405993	0.342239	-1.18628	0.23551	0.419308	0.959053	0.342414	2.80086	0.00509665	0.0194323	0.17753	0.341208	0.520298	0.602856	0.762407	-0.194862	0.344518	-0.565607	0.571661	0.729332	-0.096186	0.343024	-0.280406	0.779166	1	-1.0222
Arhgap26	ENSRNOG00000013920	Rho GTPase activating protein 26 [Source:RGD Symbol;Acc:1310923]	728.918	0.192646	0.220143	0.875093	0.381523	0.702604	-0.446294	0.220577	2.0233	0.0430419	0.174636	-0.317616	0.221178	1.43602	0.150997	0.422287	0.063968	0.22161	0.288651	0.772848	0.967473	0.722677	0.222143	3.25321	0.00114111	0.00614767	0.447607	0.219505	2.03916	0.0414338	0.108472	0.780902	0.222048	3.51681	0.000436762	0.00275142	0.496965	0.220618	2.2526	0.0242841	0.0738468	0.242004	0.219981	1.10011	0.271283	1	0.721364
Arhgap27	ENSRNOG00000028569	Rho GTPase activating protein 27 [Source:RGD Symbol;Acc:735202]	78.2999	1.18733	0.421251	2.81858	0.00482366	0.0814552	0.239433	0.416233	-0.575239	0.56513	0.781358	0.922373	0.422296	-2.18418	0.0289487	0.159601	0.50439	0.417303	1.20869	0.226782	0.684344	0.409894	0.416112	0.985058	0.324595	0.517539	0.479507	0.416338	1.15173	0.249434	0.413754	0.0444517	0.41711	0.106571	0.91513	0.95723	-0.427125	0.422258	-1.01153	0.311764	0.491817	0.280697	0.417368	0.672542	0.501239	1	-0.309046
Arhgap28	ENSRNOG00000017065	Rho GTPase activating protein 28 [Source:RGD Symbol;Acc:1559882]	29.7794	-0.184914	0.36745	-0.503236	0.614798	0.854694	0.519906	0.367796	-1.41357	0.157487	0.389748	-0.122321	0.367336	0.332996	0.739137	0.912766	0.457314	0.367682	1.24377	0.213582	0.670156	0.353201	0.368146	0.959406	0.337354	0.529744	-0.471053	0.368237	-1.27921	0.200823	0.355711	-0.194934	0.36797	-0.529755	0.596282	0.757787	0.0616449	0.367849	0.167582	0.866912	0.927555	0.347783	0.368635	0.943435	0.345459	1	0.304347
Arhgap29	ENSRNOG00000012563	Rho GTPase activating protein 29 [Source:RGD Symbol;Acc:1306185]	180.347	-0.266535	0.39677	-0.671763	0.501735	0.788571	-0.496265	0.398143	1.24645	0.212599	0.462164	-0.307451	0.397086	0.774267	0.438773	0.72824	-0.45535	0.398457	-1.14278	0.253128	0.712433	-0.376436	0.397998	-0.945825	0.344238	0.536913	0.0131189	0.396256	0.0331071	0.973589	0.98569	0.451614	0.397239	1.13688	0.255587	0.446113	0.386423	0.39649	0.974608	0.329755	0.511155	0.106768	0.395975	0.269633	0.787442	1	0.10671
Arhgap30	ENSRNOG00000004192	Rho GTPase activating protein 30 [Source:RGD Symbol;Acc:1561419]	93.3231	1.49824	0.446175	3.35797	0.000785184	0.0289125	0.419876	0.44327	-0.947225	0.343524	0.605668	1.83031	0.446046	-4.10342	4.07088e-05	0.00142326	0.0878057	0.443137	0.198146	0.842931	0.980426	-0.0417542	0.442783	-0.0942993	0.924871	0.963104	0.449126	0.443439	1.01283	0.311144	0.481337	0.423962	0.443039	0.956941	0.338597	0.534471	-1.2084	0.446136	-2.7086	0.00675682	0.0258369	-0.159286	0.443398	-0.35924	0.719416	1	-0.910757
Arhgap31	ENSRNOG00000003088	Rho GTPase activating protein 31 [Source:RGD Symbol;Acc:1306093]	67.4313	1.05315	0.460969	2.28466	0.022333	0.186615	-0.706399	0.460998	1.53233	0.125442	0.336979	-0.336308	0.460887	0.729697	0.465576	0.748646	0.683063	0.46092	1.48196	0.138351	0.601409	-0.199219	0.460997	-0.432147	0.665634	0.806978	0.606462	0.461017	1.31549	0.188346	0.339662	-0.869182	0.460943	-1.88566	0.0593408	0.158103	-0.572119	0.460968	-1.24112	0.21456	0.383309	-0.125427	0.461017	-0.272066	0.785571	1	-0.0992819
Arhgap35	ENSRNOG00000015852	Rho GTPase activating protein 35 [Source:RGD Symbol;Acc:1308738]	2590.73	-0.15454	0.171388	-0.901697	0.367218	0.692612	0.230908	0.171332	-1.34772	0.177747	0.41904	0.00131824	0.171397	-0.00769118	0.993863	1	0.0750493	0.17134	0.438013	0.661377	0.937934	1.29626	0.171959	7.53821	4.76462e-14	1.69736e-12	0.951421	0.171688	5.54157	2.99769e-08	3.89005e-07	1.28014	0.17188	7.44785	9.48763e-14	3.28989e-12	1.10555	0.171812	6.43466	1.23751e-10	2.30713e-09	-0.000409637	0.172111	-0.00238008	0.998101	1	0.113936
Arhgap39	ENSRNOG00000016566	Rho GTPase activating protein 39 [Source:RGD Symbol;Acc:1593158]	622.277	0.45535	0.258601	1.76082	0.0782684	0.344725	0.0959672	0.257561	-0.3726	0.709446	0.873223	0.18352	0.259272	-0.707829	0.479052	0.757278	0.367797	0.258235	1.42427	0.154367	0.61767	0.452391	0.257734	1.75526	0.0792144	0.192264	0.658315	0.257687	2.5547	0.0106278	0.0362334	0.0697788	0.257955	0.270508	0.786769	0.88478	0.127642	0.258947	0.492927	0.622064	0.768566	-0.0753232	0.258035	-0.29191	0.770355	1	-0.301891
Arhgap4	ENSRNOG00000058545	Rho GTPase activating protein 4 [Source:RGD Symbol;Acc:628901]	95.1178	0.686883	0.460705	1.49094	0.135978	0.450554	-0.507455	0.460684	1.10152	0.270668	0.530034	1.07378	0.46069	-2.33081	0.0197634	0.123771	-0.894353	0.460668	-1.94142	0.0522068	0.422954	-0.159374	0.460693	-0.345943	0.729385	0.848718	0.621949	0.460629	1.35022	0.176947	0.324323	0.590918	0.460583	1.28298	0.1995	0.377032	-0.301435	0.460709	-0.654284	0.512929	0.680474	-0.236501	0.460633	-0.513426	0.607653	1	-0.273868
Arhgap5	ENSRNOG00000004696	Rho GTPase activating protein 5 [Source:RGD Symbol;Acc:1308507]	2005.44	0.0473783	0.195011	0.242952	0.808042	0.942155	0.177782	0.194812	-0.912581	0.361463	0.621936	0.375186	0.194909	-1.92493	0.0542378	0.23318	-0.150025	0.19471	-0.770506	0.441	0.844724	0.814549	0.195137	4.17425	2.98971e-05	0.000249474	0.629312	0.194919	3.22859	0.00124401	0.00574389	0.650201	0.194611	3.34103	0.000834696	0.00482392	0.615493	0.195262	3.15215	0.00162076	0.0076613	0.0335592	0.19517	0.171949	0.863478	1	0.00745416
Arhgap8	ENSRNOG00000033570	Rho GTPase activating protein 8 [Source:RGD Symbol;Acc:1303143]	15.1655	-0.20089	0.382788	-0.524807	0.599717	0.845177	-0.0308318	0.382182	0.080673	0.935702	0.980715	0.332963	0.383572	-0.868058	0.385363	0.685544	-0.564685	0.382967	-1.4745	0.140347	0.603907	-0.519968	0.383576	-1.35558	0.175233	0.343589	-0.572805	0.384797	-1.48859	0.136595	0.268155	0.328875	0.384981	0.854265	0.392958	NA	-0.168621	0.384164	-0.438931	0.660712	0.796579	0.203294	0.386168	0.526439	0.598583	1	0.0836695
Arhgap9	ENSRNOG00000006946	Rho GTPase activating protein 9 [Source:RGD Symbol;Acc:1305342]	159.294	0.310922	0.427334	0.727585	0.466868	0.764988	0.357216	0.426568	-0.837418	0.402358	0.65646	-0.480671	0.428557	1.1216	0.262031	0.562383	1.14881	0.427796	2.68541	0.00724403	0.183858	-0.420127	0.425892	-0.986463	0.323906	0.516836	0.0654622	0.426364	0.153536	0.877976	0.929252	-0.982599	0.427438	-2.29881	0.0215158	0.0727822	-0.269997	0.427087	-0.632183	0.527267	0.692463	-0.0245376	0.426116	-0.0575843	0.95408	1	-0.842805
Arhgdia	ENSRNOG00000036688	Rho GDP dissociation inhibitor (GDI) alpha [Source:RGD Symbol;Acc:1359547]	10380.8	0.172796	0.110707	1.56084	0.118562	0.422199	-0.314318	0.110758	2.83788	0.00454144	0.0380666	-0.436595	0.110997	3.9334	8.37527e-05	0.00251863	0.295073	0.111048	2.65718	0.00787981	0.186315	-0.332993	0.110694	-3.00823	0.00262776	0.0125859	0.000259169	0.110451	0.00234645	0.998128	0.999425	-0.456623	0.110785	-4.12172	3.76062e-05	0.00031987	-0.0608881	0.110649	-0.550283	0.582125	0.737937	0.111649	0.110393	1.01138	0.311835	1	-0.0189346
Arhgdib	ENSRNOG00000005809	Rho, GDP dissociation inhibitor (GDI) beta [Source:RGD Symbol;Acc:1305383]	1010.89	-0.179537	0.236599	-0.758825	0.447958	0.750293	0.976778	0.235589	-4.14611	3.38164e-05	0.00094171	0.434157	0.236039	-1.83934	0.0658647	0.261131	0.363084	0.235026	1.54487	0.122378	0.581829	-0.367388	0.234166	-1.56892	0.116666	0.255553	0.0308782	0.235938	0.130874	0.895875	0.940541	-0.182771	0.23466	-0.778876	0.436053	0.629783	0.40751	0.236445	1.72349	0.0848005	0.195609	0.197094	0.235783	0.835911	0.403205	1	-1.37505
Arhgef1	ENSRNOG00000020130	Rho guanine nucleotide exchange factor (GEF) 1 [Source:RGD Symbol;Acc:620951]	544.92	0.0067875	0.265922	0.0255244	0.979637	0.998473	0.173722	0.265549	-0.654198	0.512984	0.743337	-0.506104	0.267324	1.89323	0.0583278	0.242659	0.686614	0.266953	2.57204	0.0101101	0.207383	0.0646584	0.265062	0.243937	0.80728	0.898505	0.36542	0.265325	1.37725	0.168434	0.313439	-0.484846	0.266291	-1.82074	0.0686469	0.175851	0.437243	0.2661	1.64315	0.100352	0.221948	0.0786103	0.265504	0.29608	0.767169	1	-0.474484
Arhgef11	ENSRNOG00000015026	Rho guanine nucleotide exchange factor (GEF) 11 [Source:RGD Symbol;Acc:619705]	469.011	0.395148	0.298858	1.3222	0.186103	0.518288	-0.2493	0.298475	0.835245	0.40358	0.657603	-0.142171	0.30024	0.473524	0.635839	0.856617	0.28802	0.29986	0.960513	0.336797	0.774827	-0.139046	0.298301	-0.466125	0.641126	0.788961	0.312696	0.297368	1.05155	0.293008	0.462036	-0.280352	0.298727	-0.938491	0.347992	0.544549	-0.331346	0.298477	-1.11012	0.266947	0.443699	-0.248894	0.296985	-0.838067	0.401993	1	-0.202442
Arhgef12	ENSRNOG00000008924	Rho guanine nucleotide exchange factor (GEF) 12 [Source:RGD Symbol;Acc:1305111]	440.559	0.392814	0.329019	1.19389	0.23252	0.571148	-0.021619	0.328447	0.0658219	0.94752	0.985818	0.25247	0.329377	-0.766508	0.443374	0.73118	0.118725	0.328806	0.361078	0.718041	0.953288	0.639192	0.328965	1.94304	0.0520112	0.140513	0.665356	0.328411	2.02599	0.0427659	0.111274	0.447124	0.328715	1.36022	0.173761	0.343151	0.0223667	0.329101	0.0679631	0.945815	0.971321	-0.250176	0.328493	-0.761586	0.446307	1	-0.00454495
Arhgef15	ENSRNOG00000004566	Rho guanine nucleotide exchange factor (GEF) 15 [Source:RGD Symbol;Acc:1306961]	74.5517	-0.705363	0.448027	-1.57438	0.1154	0.417826	-0.858769	0.44984	1.90906	0.0562549	0.207138	-0.862068	0.448359	1.92272	0.0545156	0.233979	-0.702064	0.450167	-1.55956	0.118863	0.578078	-0.438015	0.450023	-0.973317	0.330396	0.523116	0.186752	0.448182	0.416688	0.676907	0.799091	0.26988	0.448757	0.601393	0.547578	0.722584	1.0323	0.448017	2.30414	0.0212147	0.0659608	0.14018	0.448173	0.312782	0.754446	1	0.234002
Arhgef16	ENSRNOG00000046803	Rho guanine nucleotide exchange factor (GEF) 16 [Source:RGD Symbol;Acc:1588981]	23.9825	-0.236177	0.403324	-0.585575	0.558161	0.822169	-0.586492	0.402109	1.45854	0.144692	0.369268	-0.996709	0.401929	2.47981	0.0131451	0.0958651	0.174041	0.400711	0.434329	0.664049	0.939985	0.0301038	0.401632	0.0749535	0.940252	0.969147	0.491414	0.403281	1.21854	0.223018	0.382495	-0.314695	0.401899	-0.783019	0.433616	0.627806	0.829445	0.403024	2.05805	0.0395852	0.108979	0.101854	0.402981	0.252752	0.80046	1	0.125181
Arhgef18	ENSRNOG00000028090	rho/rac guanine nucleotide exchange factor (GEF) 18 [Source:RGD Symbol;Acc:1311448]	982.594	0.214659	0.2047	1.04865	0.294338	0.630047	0.284619	0.203974	-1.39537	0.162905	0.396352	-0.0770318	0.205329	0.375163	0.707539	0.89603	0.57631	0.204606	2.81669	0.00485218	0.152596	0.997312	0.204638	4.87355	1.09613e-06	1.257e-05	0.747932	0.204453	3.65822	0.000253978	0.00140943	0.691129	0.205523	3.36279	0.000771603	0.00452153	0.585092	0.205327	2.84956	0.00437802	0.0179608	0.0518192	0.205081	0.252677	0.800518	1	-0.0352383
Arhgef19	ENSRNOG00000047967	Rho guanine nucleotide exchange factor (GEF) 19 [Source:RGD Symbol;Acc:1304766]	178.14	-1.22718	0.380263	-3.22719	0.00125012	0.038012	0.765053	0.381179	-2.00707	0.0447421	0.178954	-0.411622	0.378571	1.0873	0.276903	0.577908	-0.0505079	0.379492	-0.133093	0.89412	0.991967	-0.148153	0.378591	-0.391327	0.695556	0.827997	-0.741848	0.379924	-1.95262	0.0508645	0.127399	0.0709422	0.378279	0.187539	0.851238	0.922364	1.03743	0.378829	2.73853	0.00617148	0.0239855	0.552098	0.378487	1.4587	0.144648	1	-0.171357
Arhgef2	ENSRNOG00000020027	rho/rac guanine nucleotide exchange factor (GEF) 2 [Source:RGD Symbol;Acc:1304659]	1583.61	0.0708067	0.163248	0.433736	0.66448	0.880098	0.395433	0.162547	-2.43273	0.0149854	0.0867654	0.228751	0.163267	-1.40109	0.161188	0.438063	0.237489	0.162565	1.46088	0.144048	0.607328	0.306759	0.162174	1.89154	0.0585519	0.153485	0.275994	0.162546	1.69795	0.0895178	0.196856	0.0848943	0.162217	0.523337	0.60074	0.760631	-0.029825	0.1629	-0.183088	0.854729	0.919355	-0.235013	0.162195	-1.44895	0.147352	1	-0.364668
Arhgef25	ENSRNOG00000005034	Rho guanine nucleotide exchange factor (GEF) 25 [Source:RGD Symbol;Acc:735210]	2049.85	-0.369346	0.156785	-2.35576	0.018485	0.168288	0.473083	0.156645	-3.02009	0.00252698	0.0247499	0.017198	0.156537	-0.109865	0.912517	0.986681	0.0865389	0.156398	0.553326	0.580041	0.904928	0.258627	0.156171	1.65605	0.0977112	0.224445	-0.0658304	0.156378	-0.420969	0.673778	0.796258	0.258795	0.156105	1.65783	0.0973519	0.2276	0.218984	0.156271	1.40131	0.161122	0.31346	-0.0845324	0.155863	-0.54235	0.587577	1	-0.148625
Arhgef28	ENSRNOG00000016544	Rho guanine nucleotide exchange factor (GEF) 28 [Source:RGD Symbol;Acc:1307061]	564.623	-0.272065	0.238836	-1.13913	0.254649	0.593311	-0.5373	0.240368	2.23532	0.0253962	0.124816	-0.363811	0.239245	1.52066	0.128345	0.384947	-0.445555	0.240775	-1.85051	0.0642407	0.467785	0.604057	0.242144	2.49462	0.0126092	0.0458001	0.751839	0.239385	3.14071	0.00168536	0.00750348	0.935019	0.240421	3.88908	0.000100624	0.000767576	0.870601	0.239241	3.63901	0.000273684	0.00164987	-0.153303	0.239789	-0.639325	0.522612	1	0.389519
[truncated: 14,021 more rows]
[truncated: 50 more columns]
