# Supplementary material for: Axon TRAP reveals learning-associated alterations in cortical axonal mRNAs in the lateral amygdala
Source: eLife. 2019 Dec 11;8:e51607. doi: 10.7554/eLife.51607 (PMC6924958; doi:10.7554/eLife.51607)
Supplement: Supplementary file 4. [file elife-51607-supp4.xlsx]

## Sheet: Supplementary file 4
DAVID GO Term and KEGG Pathway results		All enriched or regulated in axons								All enriched or regulated in cortex, not axons								Upregulated in Axons								Downregulated in Axons								Upregulated in Cortex								Downregulated in Cortex
Category	Term	# genes	%	PValue	Genes	Fold Enrichment	Bonferroni	Benjamini-Hochberg p	FDR	# genes	%	PValue	Genes	Fold Enrichment	Bonferroni	Benjamini-Hochberg p	FDR	# genes	%	PValue	Genes	Fold Enrichment	Bonferroni	Benjamini-Hochberg p	FDR	# genes	%	PValue	Genes	Fold Enrichment	Bonferroni	Benjamini-Hochberg p	FDR	# genes	%	PValue	Genes	Fold Enrichment	Bonferroni	Benjamini-Hochberg p	FDR	# genes	%	PValue	Genes	Fold Enrichment	Bonferroni	Benjamini-Hochberg p	FDR
GOTERM_CC_DIRECT	GO:0005737~cytoplasm	603	41.3014	1.34722e-38	RPL18, RPL19, TUBB2B, RPL14, TUBB2A, CROCC, MALSU1, PGAM1, RP9, ACBD6, B2M, CITED2, PPP1R1A, RPLP1, RPL10, RPL11, RPL12, DHX30, PLS3, OPA1, KIF5B, KIF5A, ROCK2, MPDZ, KIF5C, PCM1, BTBD9, ST13, PITPNM1, UXT, GLUL, NME2, DCAF7, TRAPPC9, NME1, NAA20, RPS14, SIPA1L1, EIF2S2, RPS15, RYR2, RPS11, MCTS1, TRAPPC3, UNC13A, GRB14, ARHGEF28, CHCHD1, AHCTF1, NFKBIA, NAA38, SCRIB, DTD1, RPS25, PFN1, SULT4A1, …	1.55836	1.01984e-35	3.39948e-36	2.05297e-35	246	35.8079	2.75877e-10	HMGN3, S100A6, MEF2A, ADCY1, S100A8, AIF1, NELL2, TRAPPC2L, RNASEH1, RANGAP1, ZNRF2, MAP3K4, CD44, TRAK2, HOMER3, ASMTL, RPLP0, MAP2K6, CCAR2, LRRC4, CAPNS1, MAGI2, RRP7A, NAA25, RIC8A, SPAG9, DCAF6, MAPK6, CAMK4, MAPK3, HARS, ROR2, FUS, RTP4, HMGCS1, MME, BCL2L2, ARF5, DAAM1, ARFGEF1, NAA35, ADAP1, FUZ, SPATS2, RPS20, AGRN, PABPC1, DHX58, NPHP1, RECQL4, CRIP1, PAIP2, CREBBP, S100A11, FAM213B, OX…	1.41038	1.47318e-07	4.91061e-08	4.00948e-07	248	35.9942	3.07693e-08	RPL18, S100A3, SYT1, RPL19, RPL14, SNCB, MALSU1, RP9, LOC100911483, ACBD6, B2M, CITED2, APOE, RBM8A, PPP1R1A, RPLP1, RPL10, RPL11, RPL12, S100A1, SUCLG1, HCFC1R1, ST13, NME2, NME1, RPS14, AAMDC, SERBP1, RPS15, EIF2S2, RPS11, MCTS1, TRAPPC3, MDH1, SIVA1, CDV3, CHCHD1, TXN1, NAA38, BANF1, PIN1, RPS25, HNRNPA3, PFN1, TMEM50A, RPS28, PFN3, RILPL2, RPS29, FAM162A, CDC37L1, RPS23, RPS24, ZC3H15, LGALS1…	1.3477	1.54768e-05	8.59831e-07	4.43464e-05	278	48.3478	7.29005e-31	TUBB2B, CROCC, PGAM1, PTPN23, CCT3, ATXN10, TRAK1, DYNC2H1, DHX30, PLS3, EIF2B5, DAB2IP, OPA1, KIF5B, KIF5A, ROCK2, KIF5C, UBR4, PCM1, DCTN1, BTBD9, PITPNM1, GLUL, DCAF7, TRAPPC9, SIPA1L1, RYR2, TUBA4A, PDE4DIP, DBN1, GRB14, UNC13A, PALM, ALDOC, AKAP13, AHCTF1, MYO9B, AKAP11, MYO9A, SCRIB, TIPRL, SULT4A1, MACF1, CRMP1, GYS1, IQSEC3, GAD1, TUBB4A, HAP1, TUBB4B, GIT1, RPSA, PHB, ACACA, CELSR2, FAM1…	1.82406	3.79812e-28	1.89906e-28	1.05587e-27	214	48.7472	2.51154e-25	CROCC, ZNRF2, MAP3K4, TRAK2, RPLP0, PLS3, CCAR2, DAB2IP, KIF5B, KIF5C, UBR4, DCTN1, RIC8A, DCAF7, SIPA1L1, TUBA4A, RYR2, PDE4DIP, DBN1, GRB14, UNC13A, PALM, MME, AKAP11, DAAM1, ARFGEF1, MYO9A, SCRIB, MACF1, IQSEC3, TUBB4A, DHX58, GIT1, RPSA, PAIP2, ACACA, CAPN15, NOTCH3, TULP4, NSMF, SMURF1, BEGAIN, TNK2, NCOR1, CRYM, CDC42BPB, LZTS1, CKB, DYNC1H1, TUBB3, TFIP11, ARHGEF2, EXOSC9, ARHGEF18, MICAL3…	1.85841	1.20052e-22	1.20052e-22	3.59383e-22	186	32.8622	0.000439514	HMGN3, RPL19, S100A8, SNCB, ATOX1, MALSU1, SRP19, LOC100911483, ACBD6, B2M, PNN, RBM8A, APOE, PVALB, RPLP1, DNAJC8, TPT1, RPL10, RPL11, MAP2K6, RPS27A, S100A1, CAPNS1, NUDT3, RRP7A, STMN2, SUCLG1, MAGOH, STMN4, HNRNPA2B1, CST3, HCFC1R1, TMSB10, BASP1, TNNT2, ARPC1A, HSPB9, UXT, NME2, RPAIN, NME1, RPS14, PAM16, EIF2S2, ROR2, EDF1, RPS11, MCTS1, DYNLRB1, UBA52, SIVA1, HMGB1, CDV3, MRPS16, EEF1B2, R…	1.23877	0.189168	0.0086992	0.626892
GOTERM_MF_DIRECT	GO:0005515~protein binding	243	16.6438	2.35605e-29	SYT1, NONO, RBM8A, PIK3C3, DHX30, S100A1, EIF2B5, MAGI3, DAB2IP, KIF5B, MPDZ, KIF5A, ROCK2, KIF5C, BSN, RPS18, TRAPPC9, NME1, SIPA1L1, EIF2S2, RYR2, RPS10, DBN1, GRB14, UNC13A, ALDOC, MYO9B, BANF1, SCRIB, PIN1, PFN1, RPS28, MACF1, GORASP1, RPS23, HAP1, TUBB4B, GIT1, KIF3A, FDXR, S100A10, YTHDC1, CD63, DDX5, HNRNPA1, NOP10, RPS5, VDAC1, NCKAP1, NOLC1, RPL18A, RABEP1, PKP2, CDC42BPA, RHEB, NSMF, SM…	2.05175	2.71182e-26	1.35591e-26	3.78919e-26	101	14.7016	2.48405e-09	S100A4, KCNH1, HSP90AB1, KCNC1, HRAS, NOG, YLPM1, GRIK5, MRFAP1, RANGAP1, CKB, TRIM2, CD44, TRAK2, GRIN2C, SNPH, RAPGEF3, RANBP2, RARB, TUBA1A, AKIRIN2, GOLGA2, PSMD9, CEP112, DYNC1I1, KHDRBS1, MAGI2, CAPNS1, HSP90AA1, BST2, ANP32B, RALBP1, FMR1, RIMBP2, SCN2A, TLE3, ZFR, PCLO, SIRPA, RIC8A, TIMM8A1, CHRM3, VAMP8, OTOF, MAPK3, NCOA6, NGFR, COL1A1, KPNA1, FXYD1, TSHZ3, SOX2, CTNND2, CDH1, BCL2L2, …	1.82782	1.84564e-06	9.22823e-07	3.77598e-06	88	12.7721	3.01451e-06	SYT1, CLTA, GABBR1, EIF5B, UQCRQ, RPS3, NONO, DPY30, DYNLL1, MAP1LC3A, DYNLL2, RBM8A, RPS3A, MAPT, RANBP1, S100A1, STMN3, STMN2, BAIAP2, HNRNPA2B1, ERP29, CDC5L, NCL, DDIT3, RPS18, CPE, NME1, PFDN5, EIF2S2, CSTB, AKAP5, RPS10, TOMM22, WASL, MAPRE3, COBL, HMGB1, SNRPB2, RBMXRTL, BEX1, BANF1, PIN1, HNRNPL, SUMO2, PFN1, RPS28, KLC1, RPL34, SAFB, NPM1, SCG3, DNAJA1, HNRNPD, PTN, SCG5, RPL5, INPP5D, R…	1.64659	0.00173486	0.000157839	0.00442724	136	23.6522	6.7071e-29	SRCIN1, LMO7, ANK3, PDE4A, PIK3C3, PRKACA, DHX30, EIF2B5, DAB2IP, ACTN4, KIF5B, ROCK2, KIF5A, KIF5C, MTA1, BSN, ACTN1, ACTN2, TRAPPC9, RASGRF1, SIPA1L1, USO1, AKAP6, RYR2, CLIP1, CLIP2, DBN1, GRB14, UNC13A, SMARCA4, KALRN, ALDOC, MYO9B, SCRIB, EIF3A, PTK2, MACF1, GORASP1, HAP1, AP2M1, TUBB4B, GIT1, HCN2, KIF3A, HTT, FSCN1, FDXR, DDX5, SHANK1, SHANK2, SHANK3, VDAC1, NCKAP1, HDAC5, HDAC3, PLCG1, NE…	2.76172	4.89618e-26	4.89618e-26	1.01715e-25	100	22.779	1.8447e-20	GRIK5, LMO7, TRAK2, GRIN2C, PDE4A, PIK3C3, TUBG1, DAB2IP, ACTN4, KIF5B, KIF5C, BSN, ACTN1, ACTN2, RIC8A, RASGRF1, SIPA1L1, USO1, CLIP1, RYR2, CLIP2, DBN1, UNC13A, GRB14, SMARCA4, KALRN, ARFGEF1, SCRIB, MACF1, AP2M1, GIT1, HCN2, KIF3A, SHANK1, SHANK2, SHANK3, NCKAP1, HDAC4, PLCG1, NEDD4, TSC2, SPTBN2, MYO16, NSMF, BEGAIN, MTOR, SMURF1, NCOR1, NCOR2, CDC42BPB, MYH10, LZTS1, ATL1, YLPM1, PINK1, MBP,…	2.68674	1.08099e-17	1.08099e-17	2.71567e-17	73	12.8975	2.7137e-05	NOG, CLTA, MRFAP1, UQCRQ, DPY30, DYNLL1, MAP1LC3A, DYNLL2, RBM8A, RPS3A, RANBP1, RARB, S100A1, AKIRIN2, DYNC1I1, CAPNS1, HSP90AA1, STMN2, HNRNPA2B1, ERP29, ZFR, SIRPA, NCL, RPS18, NME1, PFDN5, EIF2S2, NCOA6, TOMM22, WASL, NGFR, MAPRE3, FXYD1, HMGB1, SOX2, BEX1, BANF1, PIN1, SUMO2, RPS28, KLC1, RPL34, SCG3, HNRNPD, PTN, ENO3, SCG5, INPP5D, SH2B1, RGD1304704, KAT2A, GABARAPL1, SLC12A5, LIN7B, YTHDC…	1.63793	0.015563	0.00261082	0.039867
GOTERM_CC_DIRECT	GO:0005829~cytosol	209	14.3151	2.92334e-17	CHMP3, CHMP5, PGAM1, GBF1, ATXN10, RSPH1, PIK3C3, S100A1, PIK3CB, SUCLG1, TTC7B, PIK3CD, DCTN1, ST13, NME1, TRAPPC3, MDH1, GATSL2, RUNDC3A, NFKBIA, AKAP13, TXN1, PIN1, RILPL2, IDH2, HAP1, FH, GIT1, LAMTOR5, RPSA, MOCS3, ABR, PLEKHJ1, LGALS1, ACACA, HNRNPA1, S100A13, CCT8, RHEB, MARCKS, CRYM, TRPV1, SYNJ1, PMVK, DYNLL1, MAP1LC3A, MAPT, GPX4, MFAP1A, GUCY1A3, RAB6B, THRSP, AGAP2, DPP7, CBR3, MIEN1,…	1.77563	2.21297e-14	1.70228e-15	4.45475e-14	78	11.3537	0.00054309	HSP90AB1, CDK19, S100A6, RAB9A, AIF1, UBE2G2, SNRPD1, PIP5K1B, PRDX4, RANGAP1, HSPH1, JADE1, PDPK1, EVI5, OPLAH, HOMER3, PRMT5, ANP32A, RALB, PIK3CA, RALA, KLHL20, DCTPP1, CAPNS1, HSP90AA1, CMAS, RALBP1, RAP1GDS1, GRHPR, BCL2L10, DDIT4, SPAG9, CAMK4, VAMP8, CCND2, NBR1, IGBP1, MAPK3, KPNA1, CPLX2, MVD, GGCT, SOX2, HMGCS1, BCL2L2, ARHGAP35, NR3C1, VARS, ARFGEF1, HDGFRP3, CSAD, LMTK2, PYCARD, LSG1,…	1.47011	0.251803	0.0205074	0.78641									108	18.7826	6.28133e-17	EIF6, PGAM1, DSTYK, GBF1, ATXN10, PDE4A, PDE4B, PIK3C3, PRKACA, MCM3AP, PDXK, ACTN4, PIK3CB, TTC7B, ACTN1, CORO7, EEF2, DCTN1, TRIM37, SGSM1, RASGRF1, LYST, USO1, LRRK2, GATSL2, SNX8, AKAP13, RUNDC3A, ATP6V1B2, RASAL1, PTK2, NDRG4, IDH2, HAP1, FH, GIT1, RPSA, MOCS3, ABR, HTT, FSCN1, ACACA, BPGM, HDAC5, HDAC3, PLEKHA5, PLCG1, NEDD4, TSC2, MYO16, SPTBN2, MTOR, DENND5A, OGDHL, SYNJ1, PEX6, PINK1, PP…	2.32956	5.78426e-14	1.93179e-14	1.55431e-13	82	18.6788	5.06508e-13	DENND5A, OGDHL, PEX6, DSTYK, PINK1, PIP5K1C, JADE1, ACOT7, TBC1D17, EVI5, GSN, PDE4A, PIK3C3, GUCY1A3, PIK3CA, MCM3AP, ACTN4, CMAS, TTC7B, PIK3CD, STXBP1, ACTN1, CORO7, PRKCG, EEF2, GRHPR, DCTN1, PRKCB, DDIT4, ATP6V1A, COPG2, CCND2, RASGRF1, USO1, GUCY1B3, PDCD6IP, UROD, LRRK2, ANKFY1, TRAPPC10, GSTP1, PPP2R2A, MYO5A, BCAT1, GATSL2, RAP1GAP, MVD, HK1, ATP6V1B2, NR3C1, ARFGEF1, RASAL1, IDH2, LMTK2…	2.34098	2.42099e-10	8.06998e-11	7.24742e-10
GOTERM_CC_DIRECT	GO:0043209~myelin sheath	79	5.41096	1.5029e-38	UQCRC2, SEPT4, UQCRC1, CKMT1B, ATP5B, UCHL1, PGAM1, CNP, PRDX2, CCT3, UQCRFS1, COX5A, COX5B, MBP, GOT2, GSTM1, GSN, SLC25A3, ATP5O, CNTNAP1, PDHA1, NDUFS3, SUCLA2, ATP5H, TUBA1B, NDUFS1, RPS27A, SLC25A4, ACO2, STXBP1, NDUFA10, ATP6V1A, NME2, GLUL, GNB2, NME1, PEBP1, PDCD6IP, SEPT7, UBA52, MDH1, TUFM, NAPG, ATP6V1B2, MIF, NEFH, HSPA5, GSTO1, NEFL, TUBB4A, HSPA8, NEFM, TUBB4B, HSPA9, ENO1, DLST, GD…	5.58724	1.1377e-35	2.84424e-36	2.29021e-35									24	3.48331	2.71535e-07	DLST, NAPG, EEF1A2, UCHL1, ATP1A2, SOD1, COX5A, UQCRFS1, COX5B, MIF, YWHAG, NME2, PPIA, NME1, NDUFV2, PEBP1, COX6A1, ATP5O, HSPA5, ATP5H, HSPA8, RPS27A, UBA52, MDH1	3.5692	0.000136573	7.1885e-06	0.000391349	51	8.86957	1.15749e-33	UQCRC2, SEPT4, CKMT1B, UQCRC1, ATP5B, PGAM1, CNP, CCT3, MBP, GSTM1, GOT2, GSN, SLC25A3, CNTNAP1, PDHA1, NDUFS3, SUCLA2, TUBA1B, NDUFS1, ACO2, SLC25A4, STXBP1, NDUFA10, ATP6V1A, GLUL, GNB2, SEPT7, TUFM, ATP6V1B2, NEFH, NEFL, NEFM, TUBB4A, ENO1, HSPA9, TUBB4B, GDI1, IMMT, PHB, FSCN1, MYO1D, TKT, DPYSL2, VDAC2, VDAC1, GPI, CCT5, MYH14, ATP5A1, DNM1, SPTAN1	9.15765	6.03054e-31	6.03054e-31	1.67648e-30	26	5.92255	7.99027e-13	UQCRC1, CKMT1B, ATP5B, ATP6V1B2, CKB, MBP, GOT2, HRH3, GSN, SLC25A3, NEFH, NDRG1, PDHA1, SUCLA2, NEFL, TUBB4A, NEFM, DLST, MYO1D, STXBP1, DPYSL2, NDUFA10, ATP6V1A, MYH14, PDCD6IP, SPTAN1	6.17904	3.81935e-10	9.54838e-11	1.14335e-09	17	3.00353	0.000129354	HSP90AA1, NAPG, RDX, SOD1, COX5A, UQCRFS1, COX5B, MIF, YWHAG, NME2, PPIA, NME1, COX6A1, ATP5O, ATP5H, UBA52, RPS27A	3.09845	0.0598405	0.0032424	0.184882
GOTERM_CC_DIRECT	GO:0014069~postsynaptic density	42	2.87671	3.08335e-07	PALM, LZTS1, SRCIN1, CLSTN1, MACF1, SORBS2, PTK2B, MAPT, PDE4B, NEFH, CAMK2B, CAMK2A, NEFM, HSPA8, MT3, BCAS1, ARHGEF2, DLGAP1, NOS1, DLGAP3, HTT, MPDZ, BAIAP2, LIN7B, BSN, MINK1, PRKCG, SHANK1, SHANK2, SHANK3, PJA2, PPP1R9B, PPP1R9A, EPB41L1, SIPA1L1, AKAP5, SPTBN1, NSMF, NRGN, DBN1, GAP43, KALRN	2.38383	0.000233383	8.33603e-06	0.000469859	22	3.20233	5.03504e-05	MAGI2, DLGAP2, MAP1A, MAP1B, FMR1, CTNND2, GRIK5, GRIA3, NR3C1, HOMER1, PCLO, CAMK2N1, LIN7A, PDPK1, GRIA2, HOMER3, GRIN2C, SOS1, MAP2, NPTN, ADGRL1, NGFR	2.77012	0.0265295	0.00447127	0.0731522									28	4.86957	1.70062e-09	PALM, LZTS1, SRCIN1, MACF1, SORBS2, PDE4B, NEFH, CAMK2B, CAMK2A, NEFM, BCAS1, ARHGEF2, DLGAP1, DLGAP3, HTT, MINK1, BSN, SHANK1, SHANK2, SHANK3, PJA2, PPP1R9B, PPP1R9A, SIPA1L1, SPTBN1, NSMF, DBN1, KALRN	4.03486	8.86023e-07	6.81556e-08	2.46313e-06	29	6.60592	4.84471e-13	PALM, LZTS1, GRIK5, NR3C1, MACF1, SORBS2, GRIN2C, NEFH, CAMK2B, CAMK2A, NEFM, ARHGEF2, DLGAP1, DLGAP3, BSN, MINK1, PRKCG, SHANK1, SHANK2, CAMK2N1, SHANK3, PPP1R9B, PPP1R9A, EPB41L1, SIPA1L1, SPTBN1, NSMF, DBN1, KALRN	5.53098	2.31592e-10	1.15796e-10	6.9329e-10
GOTERM_MF_DIRECT	GO:0003779~actin binding	45	3.08219	6.34015e-08	MYO5A, CROCC, HIP1R, WASF1, SSH3, SSH2, MYO9B, TPM1, PFN1, PTK2, PFN3, MACF1, GSN, MICAL1, VPS16, PLS3, MYO5B, PLEC, VPS18, MYO1B, ENC1, FSCN1, SPTBN4, MICAL3, CORO7, SHANK3, MPRIP, MK1, PPP1R9B, MYO10, YWHAG, EPB41L1, MIB2, LIMCH1, MYO16, AKAP5, MYH11, SPTBN2, SPTBN1, MARCKS, WASL, LRRK2, DBN1, SPTB, SPTAN1	2.42469	7.29725e-05	1.21625e-05	0.000101967																	33	5.73913	8.51212e-12	MYO5A, CROCC, HIP1R, WASF1, SSH3, SSH2, MYO9B, PTK2, MACF1, GSN, MICAL1, VPS16, PLS3, MYO5B, PLEC, VPS18, MYO1B, FSCN1, SPTBN4, ENC1, CORO7, SHANK3, MPRIP, PPP1R9B, MIB2, LIMCH1, SPTBN2, MYO16, SPTBN1, LRRK2, DBN1, SPTAN1, SPTB	4.27641	6.21382e-09	1.24276e-09	1.29088e-08	30	6.83371	1.025e-12	MYO5A, CROCC, SSH2, DAAM1, MACF1, GSN, PLS3, PLEC, MICAL3, SPTBN4, ENC1, KIF18A, CORO7, FLNB, SHANK3, MPRIP, PPP1R9B, MK1, MYO10, EPB41L1, XIRP2, LIMCH1, MYH11, SPTBN2, MYO16, SPTBN1, LRRK2, DBN1, SPTAN1, SPTB	5.14365	6.00625e-10	2.00208e-10	1.50889e-09
GOTERM_CC_DIRECT	GO:0043005~neuron projection	82	5.61644	1.11232e-17	SYT1, LZTS1, SRCIN1, TRPV1, SYNJ1, GABBR1, NAP1L1, ACOT7, ANK3, PCP4, MAPT, LSM4, PRKACA, S100A1, STMN3, KIF5B, PTPRF, ACTN4, KIF5A, STMN2, BAIAP2, HNRNPA2B1, KIF5C, BSN, PRKCG, GLUL, SH3KBP1, RYR2, ABAT, PEBP1, LRRK2, SEPT7, RNPEP, UNC13A, KALRN, MYO5A, HMGB1, VIM, PIN1, HNRNPA3, PFN1, NPTX1, KLC1, NEFL, HSPA8, MYO5B, NEFM, HAP1, APC, ENO1, GIT1, GDI1, KIF3A, NCDN, CPNE5, MYO1D, ASIC2, LIN7B, DP…	2.81854	8.42025e-15	7.01688e-16	1.69502e-14									26	3.77358	0.00327432	HMGB1, SYT1, NAP1L1, GABBR1, PIN1, HNRNPA3, PFN1, NPTX1, PCP4, KLC1, MAPT, LSM4, HSPA8, S100A1, STMN3, STMN2, BAIAP2, HNRNPA2B1, ASIC2, LIN7B, ATP1A2, SOD1, PARK7, PEBP1, CALM2, CALM1	1.87921	0.80789	0.0414175	4.6169	48	8.34783	1.31086e-16	MYO5A, LZTS1, SRCIN1, SYNJ1, VIM, ANK3, PRKACA, NEFL, HAP1, MYO5B, NEFM, ENO1, APC, GIT1, GDI1, KIF3A, NCDN, ACTN4, KIF5B, CPNE5, KIF5A, MYO1D, KIF5C, BSN, DPYSL2, SHANK1, SHANK2, ATP13A2, SHANK3, PPP1R9B, GPI, GLUL, PPP1R9A, PLCG1, TENM2, TSC2, RYR2, MAPK8IP3, CYFIP1, ABAT, NSMF, MAPK8IP1, LRRK2, SEPT7, RNPEP, UNC13A, KALRN, MYH10	4.18886	5.78426e-14	1.15463e-14	1.55431e-13	36	8.20046	2.23365e-12	MYO5A, LZTS1, GRIK5, NR3C1, ACOT7, HRH3, NEFL, NEFM, GIT1, KIF3A, ACTN4, KIF5B, MYO1D, KIF5C, BSN, PRKCG, DPYSL2, SHANK1, ATP13A2, SHANK2, SHANK3, PPP1R9B, MYO10, PPP1R9A, PLCG1, CSNK1D, TSC2, RYR2, MAPK8IP3, ABAT, NSMF, MAPK8IP1, LRRK2, UNC13A, KALRN, MYH10	4.15806	1.06769e-09	2.13538e-10	3.19621e-09
GOTERM_MF_DIRECT	GO:0005524~ATP binding	136	9.31507	0.00100213	PRPF4B, TARS2, DSTYK, RPS6KB2, INO80, CCT3, ITPKA, KIFC3, ACSS1, DDX18, PIK3C3, DYNC2H1, PRKACA, DHX30, MAGI3, PDXK, KIF5B, CSNK1G2, PIK3CB, ROCK2, KIF5A, KIF5C, STK4, MAP4K3, MAP4K4, RENBP, NME2, GLUL, NME3, NME1, SMARCA1, LRRK2, MYO18A, SMARCA4, KALRN, GLUD1, PEAK1, MYO9B, ATP6V1B2, RIOK1, NAGK, MYO9A, CAMKV, PTK2, DDX46, NPM1, DNAJA1, HSPE1, MOCS3, KIF3A, MYO1B, MYO1D, ACACA, DDX5, ATP13A2, MY…	1.30054	0.684635	0.0324345	1.59958																	97	16.8696	6.33564e-14	TARS2, DSTYK, INO80, RPS6KB2, CCT3, ITPKA, KIFC3, PIK3C3, DYNC2H1, PRKACA, DHX30, PDXK, KIF5B, ROCK2, KIF5A, PIK3CB, CSNK1G2, KIF5C, STK4, MAP4K3, MAP4K4, GLUL, RENBP, LRRK2, SMARCA1, MYO18A, KALRN, SMARCA4, GLUD1, PEAK1, MYO9B, ATP6V1B2, RIOK1, MYO9A, CAMKV, PTK2, MOCS3, KIF3A, MYO1B, MYO1D, ACACA, DDX5, ATP13A2, CCT5, PSMC5, ULK2, DYRK1B, PSMC1, CDC42BPA, MYO16, MYH14, MTOR, MYH10, CDC42BPB, PC…	2.23089	4.62774e-11	2.31387e-11	9.61342e-11	78	17.7677	9.14047e-13	TARS2, CKMT1B, ADCY5, ATP5B, PEX6, DSTYK, PINK1, PIP5K1C, ITPKA, CKB, MAP3K4, SLK, PIK3C3, PIK3CA, DYNC1H1, SUCLA2, KIF5B, CSNK1G2, SUCLG2, KIF5C, PI4KA, MINK1, PRKCG, PRKCB, DAPK1, MAP4K4, ATP6V1A, ACVR2B, MAST2, TESK1, MAP3K10, LRRK2, MYO18A, SMARCA2, KALRN, SMARCA4, MYO5A, MVD, SKIV2L, GLUD1, PEAK1, HK1, ATP6V1B2, BRSK1, MYO9A, CAMKV, TTBK1, LMTK2, CAMK2B, CHD6, CAMK2A, PIK3R4, DHX58, MARS, RT…	2.37349	5.35631e-10	2.67816e-10	1.34561e-09
GOTERM_CC_DIRECT	GO:0043025~neuronal cell body	87	5.9589	8.64894e-12	SRCIN1, SNCB, TRPV1, UCHL1, GABBR1, MBP, ATXN10, PVALB, RBM8A, APOE, VPS16, TUBB3, DAB2IP, ARHGEF2, PTPRF, KIF5A, STMN2, BAIAP2, ENC1, HNRNPA2B1, CST3, BSN, CPE, RASGRF1, SIPA1L1, AKAP5, PEBP1, NRGN, LRRK2, DBN1, KALRN, MYO5A, COBL, GLRX5, CCK, AGFG1, RAP1GAP, TAC1, TXN1, GLRX2, RGS10, KLC1, PTK2B, CRMP1, SORBS2, CAMK2A, OLFM1, TUBB4A, HSPA8, MYO5B, APC, UBXN1, RPSA, HCN2, KIF3A, NCDN, DLGAP3, CP…	2.17635	6.54727e-09	4.36485e-10	1.31798e-08	36	5.24017	0.00014494	KCNH1, FUS, KCNC1, CPLX2, GRIK5, CKB, BRINP2, SOS1, SNPH, PYCARD, RAPGEF3, GOLGA2, HSP90AA1, KCNB1, MAP1B, SLC12A5, DENND1A, GRIA3, HOMER1, PCLO, CAMK2N1, EIF4B, CYBA, KCNJ4, SLC4A10, GRIA2, ULK1, GTF2I, MAP2, CRH, DNMT1, ROR2, FABP7, BMPR1B, CACNA1A, CACNA1B	1.99784	0.0744838	0.00771048	0.210443									48	8.34783	2.18042e-11	MYO5A, RAP1GAP, SRCIN1, MBP, CRMP1, ATXN10, SORBS2, VPS16, CAMK2A, MYO5B, TUBB3, TUBB4A, APC, RPSA, HCN2, DAB2IP, ARHGEF2, KIF3A, NCDN, DLGAP3, HTT, CPNE5, KIF5A, MYO1D, SPTBN4, DLGAP4, ENC1, BSN, DPYSL2, SHANK2, ATP13A2, PPP1R9B, PPP1R9A, LRP1, MAP1S, RASGRF1, SIPA1L1, TSC2, SPTBN2, CYFIP1, FBXO31, MTOR, BEGAIN, LRRK2, DBN1, APBB1, KALRN, MYH10	3.04856	1.136e-08	1.03273e-09	3.15806e-08	42	9.5672	4.84573e-12	MYO5A, RAP1GAP, GRIK5, MBP, CKB, SORBS2, CAMK2A, TUBB3, TUBB4A, RPSA, HCN2, DAB2IP, ARHGEF2, KIF3A, DLGAP3, MYO1D, SPTBN4, DLGAP4, ENC1, BSN, DPYSL2, SHANK2, ATP13A2, CAMK2N1, PPP1R9B, PPP1R9A, MYO10, LRP1, MAP1S, RASGRF1, SIPA1L1, TSC2, SPTBN2, FBXO31, TNK2, SMURF1, BEGAIN, MTOR, LRRK2, DBN1, KALRN, MYH10	3.5305	2.31623e-09	3.86039e-10	6.93382e-09
GOTERM_CC_DIRECT	GO:0030424~axon	65	4.45205	4.52779e-11	SYT1, SRCIN1, ATL1, UCHL1, PINK1, ANK3, PVALB, PCP4, MAPT, CNTNAP1, KLHL24, VPS16, TUBB3, MT3, DAB2IP, STMN3, KIF5A, STMN2, CST3, BSN, MINK1, NRGN, LRRK2, GAP43, UNC13A, MYO5A, PALM, RAB3A, COBL, CCK, RAP1GAP, ALDOC, VIM, TAC1, TXN1, LLGL1, MYCBP2, KLC1, PTK2B, AP3D1, NEFH, GSTO1, GAD1, NEFL, CAMK2A, OLFM1, NEFM, HSPA8, APC, HCN2, NCDN, HTT, MYO1D, SPTBN4, DPYSL2, PARK7, PDE2A, SMURF1, TNK2, MYH1…	2.43226	3.42754e-08	1.90419e-09	6.89972e-08																	40	6.95652	1.78177e-12	MYO5A, PALM, RAB3A, SRCIN1, RAP1GAP, ATL1, ALDOC, VIM, PINK1, MYCBP2, ANK3, NEFH, AP3D1, CNTNAP1, KLHL24, VPS16, GAD1, NEFL, CAMK2A, TUBB3, NEFM, APC, HCN2, DAB2IP, NCDN, HTT, KIF5A, MYO1D, SPTBN4, BSN, MINK1, DPYSL2, PDE2A, MYH14, MAPK8IP1, LRRK2, UNC13A, PYGB, MYH10, FEZ1	3.80014	9.28316e-10	1.03146e-10	2.5807e-09	33	7.51708	2.30579e-11	MYO5A, PALM, RAP1GAP, ATL1, GRIK4, GRIK5, PINK1, MME, LLGL1, MYCBP2, NEFH, AP3D1, KLHL24, NEFL, CAMK2A, TUBB3, NEFM, HCN2, DAB2IP, MYO1D, SPTBN4, MINK1, BSN, DPYSL2, PDE2A, TNK2, SMURF1, MAPK8IP1, MYH14, LRRK2, UNC13A, MYH10, PYGB	4.14942	1.10217e-08	1.57452e-09	3.29942e-08
GOTERM_CC_DIRECT	GO:0016020~membrane	274	18.7671	1.93536e-19	RPL18, RPL19, RPL14, RPL13, PNKD, RPL15, PGAM1, LUZP1, B2M, NONO, TMEM147, DDX18, GBF1, ATXN10, APOE, PRRT1, PIK3C3, RPL10, RPL11, RPL12, HIGD1A, OPA1, PTPRF, KIF5B, KIF5A, UBR4, PCM1, DCTN1, ERGIC3, RPS18, NNT, RPS16, RPS17, NME1, RPS14, SERBP1, RPS15, RPS12, RYR2, RPS13, RPS10, RPS11, DBN1, MYO18A, AKAP13, MYO9B, XAB2, PFN1, RILPL2, MACF1, GYS1, RPS23, RPS24, GIT1, RPSA, ABR, PHB, DDX5, HNRNPA1…	1.68164	1.46507e-16	1.62785e-17	2.94921e-16									119	17.2714	1.47909e-06	RPL18, RPL19, RPL14, RPL13, PNKD, RPL15, LUZP1, B2M, NONO, TMEM147, DDX18, APOE, PRRT1, RPL10, RPL11, RPL12, RPS27A, HIGD1A, CUTA, STMN2, HNRNPA2B1, ERP29, RPS18, SEC61B, RPS16, NME1, RPS17, SERBP1, RPS14, RPS15, RPS12, RPS13, RPS10, RPS11, DYNLRB1, SEC61G, CHMP2A, COBL, HNRNPL, PFN1, FIS1, DDX46, RILPL2, RPL7, RPL6, RPL9, NPM1, RPL8, DNAJA1, RPL5, HSPE1, RPL10A, RPL4, RPS23, RPS24, NTPCR, HNRNPA…	1.53575	0.000743708	3.54272e-05	0.00213173	133	23.1304	8.23764e-17	PGAM1, CNP, CTNNBL1, RAD21, GBF1, ATXN10, ANK3, PDE4A, PDE4B, PIK3C3, PRKACA, OPA1, KIF5B, CSNK1G2, KIF5A, UBR4, CORO7, EEF2, PCM1, DCTN1, ABHD17A, USO1, RYR2, CLIP1, PAF1, LRRK2, SEPT7, MYO18A, DBN1, LRPPRC, SPTB, SMARCA4, AKAP13, MYO9B, XAB2, EIF3D, EIF3A, MACF1, GYS1, EIF3L, GIT1, RPSA, HCN2, ABR, FIBP, PHB, SPTBN4, DOCK9, DDX5, SHANK1, VDAC1, PSMC5, PLEKHA5, NEDD4, TSC2, PSMC1, MYO16, CYFIP2,…	2.07242	5.78426e-14	1.44329e-14	1.55431e-13	96	21.8679	4.92366e-11	DENND5A, HELZ2, ADCY5, ATP5B, GRIK4, GRIK5, PINK1, RPS2, CTNNBL1, RPLP0, PDE4A, CHST11, PIK3C3, SLC25A3, RANBP2, AGAP1, DYNC1H1, IMPDH2, KIF5B, CMAS, CSNK1G2, UBR4, PI4KA, LAS1L, CORO7, EEF2, HERC2, MED13, DCTN1, RIC8A, PKD2L2, PRKCB, CCND1, ABHD17A, FAM120A, CCND2, IPO4, IGF2R, USO1, RYR2, CLIP1, PDCD6IP, LRRK2, DBN1, ANKFY1, CPSF2, MYO18A, SPTB, SMARCA4, MYO5A, RAP1GAP, MME, NR3C1, DAAM1, POLR2…	1.97985	2.3535e-08	2.94188e-09	7.04539e-08	94	16.6078	7.30045e-05	SLC44A1, CLTA, RPL19, QPCTL, PNKD, LUZP1, DNAJB12, PMVK, DPY19L1, PNN, B2M, RABAC1, DYNLL1, DYNLL2, APOE, PRRT1, PCBP2, RPN1, RPL10, RPL11, GNL2, RPS27A, HIGD1A, CAPNS1, HSP90AA1, STMN2, HNRNPA2B1, ERP29, COX4I1, CYB5A, NCL, HNRNPU, ATP6V1F, MGAT1, RPS18, SEC61B, NME1, RPS17, NBR1, RPS14, ACAP2, RPS12, RPS13, TOMM22, RPS11, DYNLRB1, SEC61G, CHMP2A, MFSD6, RPL27A, RPL35, RPL36, RPS15A, SEC62, FIS1…	1.48675	0.034225	0.00193282	0.104383
GOTERM_MF_DIRECT	GO:0051015~actin filament binding	31	2.12329	9.25507e-08	HIP1R, MYO9B, TPM1, VPS16, PLS3, ACTN4, MYO1B, FSCN1, MYO1D, ACTN1, ACTN2, EEF2, NEXN, GAS7, CORO1C, ARPC1A, UXT, PPP1R9B, PPP1R9A, MYO10, MAP1S, SVIL, SIPA1L1, ARPC5L, MYO16, MYH14, MYO18A, DBN1, LRPPRC, MYH10, SPTB	2.99219	0.00010652	1.52179e-05	0.000148847																	25	4.34783	6.72112e-12	ACTN4, HIP1R, MYO1B, MYO1D, FSCN1, ACTN1, MYO9B, EEF2, ACTN2, NEXN, CORO1C, PPP1R9B, PPP1R9A, MAP1S, SIPA1L1, SVIL, MYO16, MYH14, VPS16, DBN1, MYO18A, LRPPRC, PLS3, SPTB, MYH10	5.8035	4.90638e-09	1.22659e-09	1.01927e-08	19	4.32802	4.08165e-09	ACTN4, MYO1D, ACTN1, ACTN2, EEF2, NEXN, CORO1C, PPP1R9B, MYO10, PPP1R9A, MAP1S, SIPA1L1, MYO16, MYH14, DBN1, MYO18A, PLS3, SPTB, MYH10	5.83564	2.39184e-06	3.98641e-07	6.00881e-06
GOTERM_MF_DIRECT	GO:0005096~GTPase activator activity	34	2.32877	2.57591e-05	RABGAP1, AGFG1, RAP1GAP, TBC1D8, TBC1D9, RALGAPB, MYO9B, NPRL2, MYO9A, LLGL1, ARHGAP21, RGS10, RASAL1, CHM, RANBP1, AGAP1, AGAP2, TBC1D9B, GIT1, GDI1, GDI2, TBC1D2B, DAB2IP, ABR, SIPA1L2, ARHGAP26, ARHGEF11, SGSM1, RABEP1, SGSM2, RASGRF1, SIPA1L1, TSC2, LRRK2	2.20369	0.0292139	0.00164582	0.0414198																	25	4.34783	2.76506e-08	RABGAP1, TBC1D8, RAP1GAP, TBC1D9, RALGAPB, MYO9B, MYO9A, ARHGAP21, RASAL1, CHM, AGAP1, AGAP2, TBC1D9B, GIT1, GDI1, TBC1D2B, DAB2IP, ABR, SIPA1L2, ARHGEF11, SGSM1, RASGRF1, SIPA1L1, TSC2, LRRK2	3.89703	2.01848e-05	2.52312e-06	4.19331e-05	23	5.23918	3.40765e-09	GIT1, DAB2IP, ABR, RAP1GAP, TBC1D8, TBC1D9, RALGAPB, PREX2, SIPA1L2, NPRL2, ARFGEF1, MYO9A, LLGL1, RIC8A, RASAL2, ARHGAP21, RASAL1, EVI5, RASGRF1, SIPA1L1, TSC2, AGAP1, LRRK2	4.74359	1.99688e-06	3.99377e-07	5.01658e-06
GOTERM_CC_DIRECT	GO:0030425~dendrite	62	4.24658	2.43627e-05	SRCIN1, TRPV1, RPS3, ATXN10, ANK3, RBM8A, APOE, MAPT, ACAD9, TUBB3, DAB2IP, OPA1, MPDZ, BSN, MINK1, PRKCG, DDN, HNRNPR, CPE, CLIP2, NRGN, LRRK2, MYO5A, COBL, GLRX5, CCK, RAP1GAP, GNG13, TXN1, GLRX2, CRMP1, PTK2B, SORBS2, CAMK2B, CAMK2A, HAP1, HSPA8, APC, UBXN1, NOS1, NCDN, HTT, FSCN1, DLGAP4, DPYSL2, CAPN2, SHANK1, RPL28, PPP1R9A, LRP1, PDE2A, MAP1S, TENM2, TSC2, RHEB, MAPK8IP3, NSMF, TNK2, BEGAI…	1.74121	0.0182738	0.000512169	0.037119	42	6.11354	3.91367e-08	KCNH1, FUS, KCNC1, CPLX2, KCNC3, NELL2, GRIK4, GRIK5, CTNND2, MME, RANGAP1, CKB, BRINP2, FAT3, RPLP0, PABPC1, KLHL20, BRD1, MAGI2, NIN, DLGAP2, KCNB1, FMR1, MAP1B, DENND1A, GRIA3, HOMER1, PCLO, CAMK2N1, EIF4B, CYBA, KCNJ4, PLK2, GRIA2, CHRM3, MAP2, NPTN, ROR2, BMPR1B, CACNA1A, KPNA1, CACNA1B	2.61672	2.08988e-05	5.22473e-06	5.68796e-05									39	6.78261	2.71254e-08	MYO5A, SRCIN1, RAP1GAP, CRMP1, ATXN10, ANK3, SORBS2, CAMK2B, ACAD9, CAMK2A, HAP1, TUBB3, APC, DAB2IP, OPA1, NCDN, HTT, FSCN1, DLGAP4, BSN, MINK1, DPYSL2, DDN, SHANK1, CAPN2, PPP1R9A, LRP1, PDE2A, MAP1S, TENM2, TSC2, MAPK8IP3, CLIP2, NSMF, BEGAIN, MAPK8IP1, MTOR, LRRK2, FEZ1	2.78078	1.41322e-05	9.42155e-07	3.92876e-05	34	7.74487	8.24965e-09	MYO5A, RAP1GAP, GRIK4, GRIK5, MME, CKB, FAT3, SORBS2, RPLP0, CAMK2B, CAMK2A, TUBB3, DAB2IP, DLGAP4, BSN, MINK1, PRKCG, DPYSL2, DDN, SHANK1, CAMK2N1, PPP1R9A, LRP1, PDE2A, MAP1S, TSC2, MAPK8IP3, CLIP2, NSMF, TNK2, MAPK8IP1, BEGAIN, MTOR, LRRK2	3.20859	3.94332e-06	4.38148e-07	1.18047e-05
GOTERM_MF_DIRECT	GO:0032403~protein complex binding	68	4.65753	6.59682e-12	ATP5D, UQCRC2, UQCRC1, WASF1, SYNJ1, PEX6, UQCRFS1, RPS2, TOP1, RPS3A, MAPT, SLC25A3, TUBB5, ATP5O, CDK5RAP3, PRKACA, DAB2IP, PTPRF, ACTN4, KIF5A, ST13, RPAIN, GNB2, UQCRH, SIPA1L1, MB21D2, PEX26, AKAP5, PPP2R2A, SMARCA4, UQCRB, ING2, CALY, NFKBIA, HK1, HADHA, MIF, RBX1, PTK2, PTK2B, HSPA4, RPS24, APC, BCKDHA, NDUFA4, GIT1, HCN2, DLGAP1, KIF3A, CD63, SHANK1, NCKAP1, VDAC1, PPP1R9B, PPP1R9A, LRP1,…	2.47244	7.59296e-09	1.89824e-09	1.06096e-08																	42	7.30435	1.22115e-12	UQCRC2, UQCRC1, WASF1, SYNJ1, PEX6, HK1, RPS2, HADHA, PTK2, SLC25A3, TUBB5, CDK5RAP3, PRKACA, HSPA4, APC, BCKDHA, GIT1, HCN2, DAB2IP, DLGAP1, KIF3A, ACTN4, KIF5A, SHANK1, VDAC1, NCKAP1, PPP1R9B, PPP1R9A, LRP1, GNB2, AP2A1, SIPA1L1, MB21D2, MYO16, SPTBN1, CYFIP1, APBB1, NCOR2, DNM1, SMARCA4, PPP2R2A, SPTAN1	3.67272	8.91428e-10	2.97143e-10	1.85189e-09	31	7.0615	3.18516e-09	UQCRC1, ATG101, PEX6, HK1, NR3C1, RPS2, HADHA, SLC25A3, TUBB5, RANBP2, GIT1, HCN2, DLGAP1, DAB2IP, KIF3A, ACTN4, SHANK1, NCKAP1, PPP1R9B, CCND1, PPP1R9A, LRP1, OTOF, SIPA1L1, PEX26, MYO16, SPTBN1, NCOR2, SMARCA4, SPTAN1, PPP2R2A	3.58662	1.8665e-06	4.66626e-07	4.68904e-06
GOTERM_MF_DIRECT	GO:0004674~protein serine/threonine kinase activity																									27	4.69565	6.08519e-06	DSTYK, PINK1, BRSK1, RIOK1, PAK7, SLK, CAMK2B, PRKACA, CAMK2A, ROCK2, CSNK1G2, MINK1, STK4, GAK, PRKCB, MAP4K3, MAP4K4, ACVR2B, DYRK1B, ULK2, HIPK2, MAP3K10, CDC42BPA, MTOR, LRRK2, CDC42BPB, KALRN	2.75703	0.00443235	0.000403755	0.00922799	27	6.15034	2.88405e-08	DSTYK, PINK1, BRSK1, SLK, TTBK1, LMTK2, PIK3CA, CAMK2B, PIK3R4, CAMK2A, TAF1, CSNK1G2, MINK1, PRKCB, MAP4K4, ACVR2B, MAST2, CSNK1D, RPS6KA2, ULK2, MAP3K10, TESK1, MTOR, TNK2, LRRK2, CDC42BPB, KALRN	3.64776	1.69004e-05	2.41436e-06	4.24576e-05
GOTERM_MF_DIRECT	GO:0005200~structural constituent of cytoskeleton	20	1.36986	8.43763e-07	TUBB2B, TUBB2A, SPTBN4, VIM, TUBGCP5, EPB41L1, ANK3, TUBB5, SPTBN2, NEFH, SPTBN1, TUBA4A, SYNM, TUBA1B, NEFL, TUBB4A, TUBB3, PLEC, TUBB4B, SPTB	3.72683	0.0009707	8.82844e-05	0.001357																	17	2.95652	4.63583e-10	TUBB2B, SPTBN4, VIM, ANK3, TUBB5, SPTBN2, NEFH, SPTBN1, TUBA4A, SYNM, NEFL, TUBA1B, TUBB4A, TUBB3, PLEC, TUBB4B, SPTB	7.6187	3.38415e-07	5.64026e-08	7.03038e-07	13	2.96128	9.69843e-08	SPTBN4, EPB41L1, SPTBN2, TUBB5, NEFH, SPTBN1, TUBA4A, SYNM, NEFL, TUBB4A, TUBB3, SPTB, PLEC	7.70833	5.68312e-05	7.10408e-06	0.000142776
GOTERM_MF_DIRECT	GO:0004672~protein kinase activity																									21	3.65217	0.000428451	PEAK1, MINK1, PINK1, RPS6KB2, HK1, STK4, GAK, CAMKV, MAP4K4, PPP1R9B, SLK, DYRK1B, HIPK2, PIK3C3, MAP3K10, PRKACA, MTOR, LRRK2, CDC42BPB, KALRN, AATK	2.43747	0.268631	0.0124355	0.647792	23	5.23918	6.69647e-07	PEAK1, MINK1, PINK1, HK1, PRKCG, NPRL2, DAPK1, CAMKV, MAP4K4, PPP1R9B, CCND1, MAP3K4, SLK, CSNK1D, TTBK1, RPS6KA2, PIK3C3, MAP3K10, MTOR, LRRK2, PIK3R4, CDC42BPB, KALRN	3.5321	0.000392336	4.36005e-05	0.000985818
GOTERM_CC_DIRECT	GO:0016459~myosin complex	14	0.958904	6.27159e-05	MYO5A, CGNL1, MYO1B, MYO1D, MYO9B, MYO9A, MYO10, DYNLL2, MYH11, MYO16, MYH14, MYO18A, MYO5B, MYH10	3.70818	0.046368	0.00118623	0.0955275																	11	1.91304	1.75199e-06	MYO5A, CGNL1, MYO1B, MYO1D, MYO16, MYO9B, MYH14, MYO9A, MYO18A, MYO5B, MYH10	7.39724	0.000912372	4.14895e-05	0.0025375	10	2.2779	1.47128e-06	MYO5A, CGNL1, MYO10, MYO1D, MYO16, MYH11, MYH14, MYO9A, MYO18A, MYH10	8.90042	0.000703025	5.86043e-05	0.00210527
GOTERM_CC_DIRECT	GO:0005913~cell-cell adherens junction	38	2.60274	8.62346e-05	CHMP5, RPL15, LMO7, KEAP1, SCRIB, PFN1, MACF1, SLK, FASN, EXOC3, HSPA5, CLINT1, UNC45A, PLEC, APC, ARGLU1, DAB2IP, KIF5B, MYO1B, BAIAP2, FLOT1, FSCN1, DOCK9, PPFIBP1, PI4KA, EEF2, GLOD4, PARK7, CSNK1D, SERBP1, MB21D2, CCT8, USO1, SPTBN2, SPTBN1, EEF1D, DBN1, SPTAN1	1.98193	0.0631971	0.00159099	0.131329																	23	4	7.65042e-06	DAB2IP, KIF5B, MYO1B, FLOT1, FSCN1, DOCK9, PI4KA, LMO7, EEF2, SCRIB, MACF1, SLK, MB21D2, USO1, SPTBN2, FASN, EXOC3, SPTBN1, DBN1, APC, PLEC, UNC45A, SPTAN1	3.04562	0.00397795	0.000147614	0.0110801	21	4.7836	1.26612e-06	DAB2IP, KIF5B, DOCK9, PI4KA, LMO7, EEF2, FLNB, SCRIB, NOTCH3, MACF1, SLK, CSNK1D, USO1, SPTBN2, FASN, EXOC3, SPTBN1, NDRG1, DBN1, PLEC, SPTAN1	3.68045	0.000605023	6.05187e-05	0.00181171
GOTERM_MF_DIRECT	GO:0098641~cadherin binding involved in cell-cell adhesion	34	2.32877	8.86413e-05	CHMP5, RPL15, SCRIB, PFN1, MACF1, SLK, FASN, EXOC3, HSPA5, CLINT1, UNC45A, PLEC, ARGLU1, DAB2IP, KIF5B, MYO1B, BAIAP2, FSCN1, DOCK9, PPFIBP1, PI4KA, EEF2, GLOD4, PARK7, CSNK1D, SERBP1, MB21D2, CCT8, USO1, SPTBN2, SPTBN1, EEF1D, DBN1, SPTAN1	2.07347	0.0969981	0.00442629	0.142465																	20	3.47826	5.60308e-05	DAB2IP, KIF5B, MYO1B, FSCN1, DOCK9, PI4KA, EEF2, SCRIB, SLK, MACF1, MB21D2, USO1, SPTBN2, FASN, EXOC3, SPTBN1, DBN1, PLEC, UNC45A, SPTAN1	2.9334	0.0400784	0.00255321	0.0849388	20	4.55581	1.05305e-06	DAB2IP, KIF5B, DOCK9, PI4KA, EEF2, FLNB, SCRIB, NOTCH3, SLK, CSNK1D, MACF1, USO1, SPTBN2, FASN, EXOC3, SPTBN1, NDRG1, DBN1, PLEC, SPTAN1	3.88112	0.000616897	6.17068e-05	0.00155024
GOTERM_CC_DIRECT	GO:0030054~cell junction									31	4.51237	5.05291e-05	CPLX2, KCNC3, GRIK4, GRIK5, CDH1, NRN1, HOMER3, GRIN2C, SNPH, AGRN, LRRC4, DNM1L, DLGAP2, KCNB1, MAP1B, RIMBP2, FMR1, GRIA3, HOMER1, PCLO, CAMK2N1, NMT1, KCNJ4, CBLN1, CHRM3, GRIA2, XIRP2, OTOF, GTF2F1, ADGRL1, CHRNE	2.26585	0.0266224	0.00384733	0.0734117									26	4.52174	0.000436474	LZTS1, SRCIN1, DSTYK, BRSK1, SCRIB, CAMK2A, HAP1, TES, DLGAP1, DLGAP3, SMC5, MINK1, ACTN1, BSN, SHANK1, SHANK2, SHANK3, PJA2, PPP1R9A, MAP1S, SIPA1L1, TENM2, SPTBN2, NSMF, PAF1, UNC13A	2.17489	0.20344	0.00527563	0.630319	27	6.15034	1.46366e-06	LZTS1, GRIK4, GRIK5, DSTYK, BRSK1, SCRIB, GRIN2C, CAMK2A, TES, DLGAP1, CTBP2, DLGAP3, MINK1, ACTN1, BSN, SHANK1, SHANK2, CAMK2N1, SHANK3, PPP1R9A, MAP1S, XIRP2, OTOF, SIPA1L1, SPTBN2, NSMF, UNC13A	2.98924	0.000699387	6.36008e-05	0.00209438
GOTERM_BP_DIRECT	GO:0043547~positive regulation of GTPase activity	53	3.63014	5.86991e-05	DENND5A, ARHGAP21, GBF1, RAPGEF5, RANBP1, AGAP1, AGAP2, EIF2B5, ARHGEF2, DAB2IP, ARHGEF18, SIPA1L2, ARHGEF12, ARHGAP26, ELMO1, ARHGEF11, SEC61B, PSD, SGSM2, SBF1, RASGRF1, SIPA1L1, LRRK2, KALRN, AGFG1, RAP1GAP, ARHGEF28, RALGAPB, AKAP13, MYO9B, NPRL2, MYO9A, LLGL1, PIN1, RGS10, RASAL1, CHM, BCAS3, IQSEC3, IQSEC2, GIT1, GDI1, NGEF, GDI2, LAMTOR4, ABR, LAMTOR2, DOCK9, S100A10, DOCK7, FNIP1, RABEP1,…	1.77706	0.199936	0.0170123	0.108424																	35	6.08696	5.72719e-08	DENND5A, RAP1GAP, RALGAPB, AKAP13, MYO9B, MYO9A, ARHGAP21, RASAL1, GBF1, CHM, RAPGEF5, BCAS3, IQSEC3, AGAP1, AGAP2, EIF2B5, IQSEC2, GIT1, GDI1, NGEF, ARHGEF2, DAB2IP, ABR, DOCK9, SIPA1L2, DOCK7, FNIP1, ARHGEF11, PSD, SBF1, RASGRF1, SIPA1L1, TSC2, LRRK2, KALRN	2.89854	0.000137901	6.8953e-05	0.000100603	30	6.83371	3.6712e-08	DENND5A, RAP1GAP, RALGAPB, PREX2, NPRL2, MYO9A, ARFGEF1, LLGL1, RASAL2, ARHGAP21, RASAL1, IQSEC3, AGAP1, IQSEC2, GIT1, ARHGEF2, DAB2IP, ABR, ARHGEF18, DOCK9, SIPA1L2, DOCK7, RIC8A, PSD, SBF1, RASGRF1, SIPA1L1, TSC2, LRRK2, KALRN	3.31262	7.16593e-05	7.16593e-05	6.29407e-05
GOTERM_CC_DIRECT	GO:0042641~actomyosin	6	0.410959	0.000696104	MYO5A, CDC42BPA, MYH14, MYO18A, CDC42BPB, MYH10	7.36821	0.409706	0.00971426	1.05552																	6	1.04348	8.18933e-06	MYO5A, CDC42BPA, MYH14, MYO18A, CDC42BPB, MYH10	18.7071	0.00425757	0.000152369	0.0118605	6	1.36674	2.07211e-06	MYO5A, HDAC4, MYH14, MYO18A, CDC42BPB, MYH10	24.7594	0.000989978	7.6187e-05	0.002965
GOTERM_CC_DIRECT	GO:0005925~focal adhesion	87	5.9589	3.32791e-20	RPL18, RPL19, SRCIN1, WASF1, GNA12, CSPG4, PIP5K1C, LMO7, RPS2, RPS3, B2M, GSN, RPS3A, PCBP2, RPLP1, RPL12, ARHGEF2, ACTN4, FLOT1, PI4KA, ACTN1, ACTN2, RPS4X, NEXN, GAK, RPS18, NME2, RPS16, GNB2, RPS17, IGF2R, RPS14, ARPC5L, RPS15, SH3KBP1, RPS13, RPS10, RPS11, PDCD6IP, PEAK1, VIM, KEAP1, RPL38, PFN1, PTK2, RPL30, RPS29, RPL7, RPL31, PTK2B, RPL6, SORBS2, RPL9, NPM1, RPL8, RPL3, RPL5, RPL4, RPL10A…	2.96775	2.51923e-17	3.14903e-18	5.07126e-17									46	6.67634	3.99915e-12	RPL18, RPL19, RPL38, RPS3, B2M, PFN1, RPL30, RPS29, RPL7, RPL6, RPS3A, RPL31, RPL9, PCBP2, RPL8, RPLP1, NPM1, RPL3, RPL5, RPL12, RPL4, RPL10A, HSPA5, HSPA8, RPL27, CD99, RPS4X, RPS5, RPS8, RPS7, RPS18, NME2, YWHAG, RPL23, RPS16, PPIB, RPL13A, PPIA, RPS17, ARPC5L, RPS14, RPS15, RPS13, RPS10, MARCKS, RPS11	3.29956	2.01156e-09	2.01156e-10	5.76377e-09	32	5.56522	6.47404e-07	SRCIN1, WASF1, GNA12, VIM, PEAK1, PIP5K1C, LMO7, RPS2, PTK2, SORBS2, GSN, HSPA9, PLEC, TES, GIT1, ARHGEF2, ACTN4, FLOT1, PI4KA, ACTN1, DOCK7, ACTN2, NEXN, CAPN2, GAK, MPRIP, NCKAP1, CORO1C, LRP1, GNB2, SVIL, CYFIP1	2.77142	0.000337241	1.77524e-05	0.000937677	26	5.92255	2.53548e-06	PEAK1, PIP5K1C, MME, LMO7, RPS2, SORBS2, GSN, RPLP0, PLEC, TES, GIT1, ARHGEF2, ACTN4, PI4KA, ACTN1, ACTN2, DOCK7, NEXN, FLNB, MPRIP, NCKAP1, CORO1C, LRP1, IGF2R, JAK1, PDCD6IP	2.98029	0.00121123	8.65648e-05	0.00362803	23	4.0636	0.00252936	RPL19, RPL27, RDX, RPL38, RPS8, B2M, RPS7, RPL30, YWHAG, NME2, RPS18, PPIB, RPL23, PPIA, RPS3A, RPL31, RPS17, RPS14, RPLP1, PCBP2, RPS13, MARCKS, RPS11	2.02191	0.701215	0.0408005	3.558
GOTERM_CC_DIRECT	GO:0008091~spectrin	5	0.342466	0.000396167	SPTBN4, SPTBN2, SPTBN1, SPTAN1, SPTB	11.257	0.25915	0.0059812	0.602003																	5	0.869565	1.01596e-05	SPTBN4, SPTBN2, SPTBN1, SPTAN1, SPTB	28.5802	0.00527917	0.000182506	0.0147138	5	1.13895	3.32945e-06	SPTBN4, SPTBN2, SPTBN1, SPTAN1, SPTB	37.8268	0.00159022	0.000106093	0.00476411
GOTERM_CC_DIRECT	GO:0043197~dendritic spine	28	1.91781	1.05904e-05	PALM, LZTS1, GABBR1, ITPKA, RGS10, PDE4B, MYO5B, HSPA8, MT3, NOS1, DLGAP3, BAIAP2, ASIC2, ACTN1, ATP1A2, DDN, SHANK1, SHANK2, SHANK3, PPP1R9B, PPP1R9A, SIPA1L1, TENM2, AKAP5, MARCKS, APBB1, DBN1, MYH10	2.55564	0.00798493	0.00022903	0.0161371																	18	3.13043	1.50079e-06	PALM, LZTS1, DLGAP3, ACTN1, DDN, SHANK1, ITPKA, SHANK2, SHANK3, PPP1R9B, PPP1R9A, SIPA1L1, TENM2, PDE4B, DBN1, APBB1, MYO5B, MYH10	4.17117	0.000781604	3.90947e-05	0.00217367	15	3.41686	4.98764e-06	PALM, LZTS1, DLGAP3, ACTN1, NR3C1, DDN, SHANK1, SHANK2, ITPKA, SHANK3, PPP1R9B, PPP1R9A, SIPA1L1, DBN1, MYH10	4.60056	0.00238126	0.000148995	0.00713671
GOTERM_BP_DIRECT	GO:0035556~intracellular signal transduction																									27	4.69565	0.000105347	GNA12, DSTYK, PINK1, AKAP13, RPS6KB2, MYO9B, BRSK1, MYO9A, RASAL1, GUCY1A3, PRKACA, ARHGEF2, ABR, MINK1, STK4, PRKCB, MAP4K3, MAP4K4, PLCG1, CDC42BPA, DGKZ, GUCY1B3, LRRK2, UNC13A, GRB14, CDC42BPB, KALRN	2.33579	0.224067	0.0209189	0.184889	28	6.37813	1.92601e-07	ADCY5, PREX2, DSTYK, PINK1, BRSK1, MYO9A, RASAL1, MAP3K4, GUCY1A3, ARHGEF2, ABR, MINK1, PRKCG, DAPK1, PRKCB, MAP4K4, TULP4, MAST2, PLCG1, RPS6KA2, JAK1, DGKZ, GUCY1B3, LRRK2, GRB14, UNC13A, CDC42BPB, KALRN	3.22973	0.000375886	0.000187961	0.000330203
GOTERM_CC_DIRECT	GO:0005856~cytoskeleton	44	3.0137	5.70625e-08	COBL, HIP1R, WASF1, SSH3, SSH2, VIM, PINK1, HSBP1, PNP, TPM1, LLGL1, ARHGAP39, PFN1, PFN3, DYNLL1, MACF1, PTK2B, MICAL1, HAP1, NEFM, PLEC, CEP295, ARHGEF2, NOS1, ROCK2, FSCN1, UBR4, ACTN1, NEXN, PRKCE, CORO1C, UXT, PPP1R9A, EPB41L1, PLEKHH3, SIPA1L1, TSC2, AKAP5, SH3KBP1, JAK1, WASL, MYO18A, LRPPRC, KALRN	2.46626	4.31954e-05	1.72785e-06	8.69552e-05																	26	4.52174	4.13037e-08	HIP1R, WASF1, SSH3, VIM, SSH2, PINK1, PNP, ARHGAP39, MACF1, MICAL1, NEFM, HAP1, PLEC, ARHGEF2, ROCK2, FSCN1, UBR4, ACTN1, NEXN, CORO1C, PPP1R9A, SIPA1L1, TSC2, MYO18A, LRPPRC, KALRN	3.70002	2.1519e-05	1.34495e-06	5.9823e-05	19	4.32802	6.83675e-06	ARHGEF2, SSH2, UBR4, PINK1, ACTN1, NEXN, LLGL1, CORO1C, PPP1R9A, EPB41L1, MACF1, PLEKHH3, SIPA1L1, TSC2, JAK1, MYO18A, NEFM, PLEC, KALRN	3.57863	0.00326264	0.000192216	0.00978246
GOTERM_BP_DIRECT	GO:0006468~protein phosphorylation																									34	5.91304	2.61851e-05	DSTYK, PINK1, RPS6KB2, HK1, AKAP13, BRSK1, RIOK1, ITPKA, CAMKV, SLK, PIK3C3, PPP3CB, CAMK2B, PRKACA, CAMK2A, AATK, ROCK2, CSNK1G2, MINK1, STK4, GAK, PRKCB, MAP4K3, MAP4K4, PPP1R9B, ACVR2B, DYRK1B, HIPK2, CDC42BPA, MAP3K10, MTOR, LRRK2, KALRN, CDC42BPB	2.23684	0.0611078	0.00896736	0.0459863	32	7.28929	4.71634e-07	DSTYK, PINK1, HK1, BRSK1, NPRL2, ITPKA, CAMKV, SLK, TTBK1, PIK3C3, LMTK2, PPP3CB, PIK3CA, CAMK2B, PIK3R4, CAMK2A, CSNK1G2, MINK1, DAPK1, PRKCB, MAP4K4, PPP1R9B, ACVR2B, CCND1, MAST2, CSNK1D, RPS6KA2, MAP3K10, MTOR, LRRK2, KALRN, CDC42BPB	2.80702	0.000920206	0.000230131	0.000808586
GOTERM_CC_DIRECT	GO:0045202~synapse	40	2.73973	0.000274638	LZTS1, SNCB, SRCIN1, TRPV1, WASF1, PFN1, ANK3, PRRT1, GAD1, OLFM1, APC, GIT1, HCN2, DLGAP1, CTBP2, NOS1, DLGAP3, DLGAP4, LIN7B, PDZD11, ASIC2, BSN, SNAPIN, ATP1A2, SHANK1, SHANK3, PPP1R9A, MAP1S, TENM2, CYFIP2, SH3KBP1, MARCKS, NSMF, NRGN, MAPK8IP1, LRRK2, APBB1, SEPT7, UNC13A, DNM1	1.83788	0.187735	0.00423446	0.417692																	25	4.34783	5.85461e-06	GIT1, HCN2, DLGAP1, LZTS1, DLGAP3, SRCIN1, WASF1, DLGAP4, BSN, SHANK1, SHANK3, PPP1R9A, MAP1S, ANK3, TENM2, CYFIP2, NSMF, MAPK8IP1, LRRK2, APBB1, GAD1, SEPT7, UNC13A, DNM1, APC	2.91635	0.00304561	0.000117311	0.0084793	21	4.7836	8.67022e-06	GIT1, HCN2, DLGAP1, LZTS1, CTBP2, DLGAP3, DLGAP4, GRIK4, MME, BSN, SHANK1, SHANK3, CAMK2N1, PPP1R9A, HRH3, MAP1S, CYFIP2, NSMF, MAPK8IP1, LRRK2, UNC13A	3.2423	0.00413581	0.000230217	0.0124058
GOTERM_BP_DIRECT	GO:0018105~peptidyl-serine phosphorylation																																	16	3.64465	3.56956e-07	TAF1, CSNK1G2, HK1, PINK1, PRKCG, PRKCB, MAST2, CSNK1D, TTBK1, RPS6KA2, MAP3K10, LMTK2, CAMK2B, MTOR, LRRK2, CAMK2A	5.2869	0.000696535	0.000232232	0.000611979
GOTERM_CC_DIRECT	GO:0043234~protein complex	83	5.68493	9.49624e-08	OXA1L, SYNJ1, HIRA, GOT2, GSTM1, TTR, PRMT1, GSN, PVALB, TUBB5, GUCY1A3, CDK5RAP3, PRKACA, DNAJC19, HIGD1A, ARHGEF2, RBBP4, ACTN4, LDB1, SUCLG1, STXBP1, PCM1, STK4, DCTN1, ST13, ACVR2B, GLUL, DCAF7, EPB41L1, GNB2, SERPINB6, IPO4, SIPA1L1, PAM16, AKAP5, RYR2, AKAP6, GUCY1B3, SEPT7, AKAP2, UNC13A, GSTP1, SPTB, SMARCA4, RAB3A, GPN3, NFKBIA, HK1, AKAP11, TPM1, FIS1, BLOC1S1, PPP3CB, PEX14, RNF168, HS…	1.83502	7.1884e-05	2.76486e-06	0.000144709																	52	9.04348	1.36432e-11	SYNJ1, HIRA, GOT2, GSTM1, GSN, TUBB5, GUCY1A3, CDK5RAP3, PRKACA, ARHGEF2, RBBP4, ACTN4, LDB1, STXBP1, PCM1, STK4, DCTN1, GLUL, ACVR2B, DCAF7, GNB2, SIPA1L1, AKAP6, RYR2, GUCY1B3, SEPT7, AKAP2, GSTP1, UNC13A, SMARCA4, SPTB, RAB3A, HK1, AKAP11, PPP3CB, PEX14, MYO5B, APC, TES, GDI1, HTT, WDR6, DPYSL2, VDAC1, HDAC5, AP2A1, PHB2, TSC2, SPTBN1, APBB1, DNM1, SPTAN1	2.91883	7.10811e-09	7.10811e-10	1.97604e-08	32	7.28929	1.47187e-05	HK1, NR3C1, AKAP11, ZNRF2, GOT2, GSN, TUBB5, PPP3CB, GUCY1A3, TES, ARHGEF2, ACTN4, SUCLG2, STXBP1, DPYSL2, DCTN1, HDAC4, ACVR2B, EPB41L1, DCAF7, IPO4, SIPA1L1, TSC2, SPTBN1, RYR2, GUCY1B3, AKAP2, UNC13A, GSTP1, SMARCA4, SPTAN1, SPTB	2.37733	0.00701092	0.000370227	0.0210594
GOTERM_BP_DIRECT	GO:0098609~cell-cell adhesion	34	2.32877	4.28503e-05	CHMP5, RPL15, PFN1, MACF1, SLK, FASN, EXOC3, HSPA5, CLINT1, UNC45A, PLEC, ARGLU1, DAB2IP, KIF5B, MYO1B, BAIAP2, FSCN1, DOCK9, PPFIBP1, PI4KA, EEF2, GLOD4, PARK7, CSNK1D, SERBP1, MB21D2, CCT8, USO1, SPTBN2, SPTBN1, EEF1D, DBN1, ADGRL3, SPTAN1	2.15034	0.150268	0.0134779	0.0791605																	19	3.30435	7.90971e-05	DAB2IP, KIF5B, MYO1B, FSCN1, DOCK9, PI4KA, EEF2, SLK, MACF1, MB21D2, USO1, SPTBN2, FASN, EXOC3, SPTBN1, DBN1, PLEC, SPTAN1, UNC45A	2.96801	0.173432	0.0171667	0.138849	19	4.32802	1.6387e-06	DAB2IP, KIF5B, DOCK9, PI4KA, EEF2, FLNB, NOTCH3, SLK, CSNK1D, MACF1, USO1, SPTBN2, FASN, EXOC3, SPTBN1, NDRG1, DBN1, PLEC, SPTAN1	3.95735	0.00319364	0.000639545	0.00280943
GOTERM_CC_DIRECT	GO:0005903~brush border																									9	1.56522	0.00136463	ACTN4, MYO1B, MYO1D, ACTN1, MYH14, MYO18A, MYO5B, PLEC, MYH10	4.17117	0.509073	0.0153475	1.95841	10	2.2779	3.42389e-05	ACTN4, MYO1D, MYH11, MME, ACTN1, MYH14, FLNB, MYO18A, PLEC, MYH10	6.13408	0.0162333	0.000743654	0.0489823
GOTERM_CC_DIRECT	GO:0045211~postsynaptic membrane									18	2.62009	0.000332409	LRRC4, DLGAP2, KCNB1, GRIK4, FMR1, GRIK5, GRIA3, HOMER1, CAMK2N1, LIN7A, KCNJ4, CBLN1, GRIA2, CHRM3, HOMER3, GRIN2C, NPTN, CHRNE	2.73816	0.162669	0.0135638	0.482024									17	2.95652	0.000218957	DLGAP1, LZTS1, DLGAP3, SRCIN1, MINK1, SHANK1, SHANK2, SHANK3, SCRIB, PJA2, ANK3, SIPA1L1, TENM2, NSMF, IQSEC3, DBN1, APBB1	2.95958	0.107821	0.00307874	0.316663	16	3.64465	3.20315e-05	DLGAP1, LZTS1, DLGAP3, GRIN2C, SIPA1L1, GRIK4, GRIK5, MINK1, NSMF, SHANK1, IQSEC3, DBN1, SHANK2, SCRIB, CAMK2N1, SHANK3	3.68667	0.0151947	0.000765273	0.0458251
GOTERM_CC_DIRECT	GO:0070062~extracellular exosome	374	25.6164	3.16575e-39	CHMP3, RPL14, CHMP5, CROCC, TUBB2A, RPL15, PTPN23, PGAM1, HIRA, LUZP1, CCT3, LOC100911483, B2M, KIFC3, GOT2, H2AFV, IFT20, APOE, VPS13D, KIFAP3, RPLP1, H2AFZ, DYNC2H1, RPL11, RPL12, DAB2IP, PTPRF, SUCLG1, C1QA, ST13, GLUL, NME2, RPS18, NME3, RPS16, RPS17, NME1, RPS14, SERBP1, PRKRIP1, RPS13, ABAT, RYR2, TUBA4A, RPS10, RPS11, WFDC2, MDH1, ALDOC, AHCTF1, TXN1, NAGK, BANF1, SCRIB, RPS25, PFN1, RILPL…	1.90935	2.39647e-36	1.19824e-36	4.82416e-36									186	26.9956	8.26331e-22	SRP14, CHMP3, RPL14, CHMP5, RPL15, SNRPD2, LUZP1, COX5A, LOC100911483, COX5B, B2M, TTR, UQCR10, CISD1, H2AFV, IFT20, APOE, PVALB, RPLP1, H2AFZ, TPT1, ROBO2, RPL11, RPL12, RPS27A, CUTA, SUCLG1, BAIAP2, ERP29, HNRNPA2B1, CST3, BASP1, C1QA, ARPC1A, ST13, RPS18, NME2, NME3, CPE, CST6, RPS16, RPS17, NME1, RPS14, SERBP1, PRKRIP1, CSTB, EDF1, RPS13, RPS10, RPS11, SNRPE, UBA52, MDH1, CHMP2A, NAPG, TXN1, …	1.99672	4.15645e-19	6.92741e-20	1.19095e-18	149	25.913	4.94639e-16	EIF6, CNDP2, CROCC, HIRA, PTPN23, PGAM1, CNP, CCT3, PNP, PDHB, KIFC3, GOT2, VPS13D, KIFAP3, DYNC2H1, PRKACA, DAB2IP, PDXK, ACTN4, ACTN1, EEF2, ACTN2, NPEPPS, HDAC11, PSMA1, RENBP, GLUL, PSMA5, PSMA4, TUBA4A, ABAT, RYR2, LRRK2, SEPT7, KALRN, ALDOC, AHCTF1, ATP6V1B2, SCRIB, PSMB4, PSMB3, IDH2, EFR3A, NDRG2, TUBB4A, AP2M1, TUBB4B, FH, RPSA, CPNE9, KIF3A, FIBP, MYO1B, CPNE5, PHB, MYO1D, SPTBN4, FSCN1…	1.93127	2.3137e-13	3.85247e-14	6.43929e-13	89	20.2733	3.40401e-05	CKMT1B, CTDSPL, CROCC, ATP5B, RPS2, CKB, GOT2, ACOT7, JADE2, SLK, GSN, VPS13D, RPLP0, KIFAP3, SLC25A3, TUBB5, DYNC1H1, SUCLA2, IMPDH2, TUBB3, DAB2IP, EXOSC9, ACTN4, ARHGEF18, PI4KA, STXBP1, ACTN1, PTPRS, MINK1, EEF2, ACTN2, DECR1, HDAC11, NPEPPS, GRHPR, FLNB, PRKCB, ATP6V1A, IGF2R, PSMA4, RYR2, ABAT, TUBA4A, PDCD6IP, LRRK2, ANKFY1, GSTP1, KALRN, MYO5A, ABHD8, SAMM50, MUM1L1, MME, ATP6V1B2, SCRIB,…	1.5268	0.0161398	0.000774532	0.048698	151	26.6784	1.1531e-17	SLC44A1, RAB9A, CHMP3, S100A8, CHMP5, LSM6, SNRPD2, LUZP1, COX5A, LOC100911483, COX5B, B2M, UQCR10, CISD1, APOE, PVALB, RPLP1, H2AFZ, TPT1, RPL11, RPS27A, CAPNS1, NUDT3, SUCLG1, ERP29, HNRNPA2B1, CST3, BASP1, SIRPA, MGAT1, ARPC1A, RPS18, NME2, CST6, RPS17, NME1, NBR1, RPS14, EDF1, RPS13, RPS11, ZNHIT6, SNRPE, UBA52, CHMP2A, RBP4, GGCT, NAPG, TXN1, BANF1, RPS25, MDP1, PSMB7, RPS28, BLOC1S1, HNRNPD…	1.98663	5.50031e-15	1.37508e-15	1.64952e-14
GOTERM_MF_DIRECT	GO:0005516~calmodulin binding	31	2.12329	1.46407e-06	MYO5A, SYT1, TRPV1, MYO9B, ITPKA, CAMKV, PCP4, PPP3CB, CAMK2B, PPP3CA, CAMK2A, MYO5B, NOS1, MYO1B, MYO1D, UBR4, BASP1, DDX5, DAPK1, MYO10, AKAP5, MYH11, RYR2, EDF1, MARCKS, ATPIF1, NRGN, UNC13A, GAP43, SPTAN1, MYH10	2.64914	0.00168373	0.000140419	0.00235461																	17	2.95652	2.96026e-05	MYO5A, MYO1B, MYO1D, UBR4, MYO9B, DDX5, ITPKA, CAMKV, PPP3CB, RYR2, CAMK2B, PPP3CA, CAMK2A, UNC13A, MYO5B, SPTAN1, MYH10	3.49393	0.0213784	0.00179923	0.0448838	15	3.41686	1.9341e-05	MYO5A, MYO1D, UBR4, ITPKA, DAPK1, CAMKV, MYO10, MYH11, PPP3CB, RYR2, CAMK2B, CAMK2A, UNC13A, SPTAN1, MYH10	4.07888	0.01127	0.00102983	0.0284691
GOTERM_CC_DIRECT	GO:0005654~nucleoplasm	204	13.9726	1.72214e-11	SNCB, PTPN23, LOC100911483, NONO, RBM8A, RPL11, OPA1, UBR4, DCAF7, RPS15, MYO18A, SIVA1, PALM, ZCRB1, MTIF2, BANF1, SCRIB, HNRNPA3, PHB, YTHDC1, TKT, DDX5, SFMBT1, HNRNPA1, FAM131B, CCT4, RNF7, SRSF4, NOLC1, WDR61, PKP2, CCT8, NSMF, PARP1, NCOR2, DPP3, EZH1, WBP4, RPS19BP1, BRD4, THRSP, ATP5H, RBBP4, MICAL3, MBD6, DECR1, CBR3, MIEN1, PFDN2, MED4, RGD1305178, THOC5, UROD, POLR2G, SKIV2L, MYG1, SF3…	1.58011	1.30366e-08	8.1479e-10	2.62431e-08	109	15.8661	1.43465e-10	HMGN3, SLC44A1, MEF2A, SURF6, PNN, KLHL8, AKAP17A, MED29, SMARCD3, DDX21, RARB, SUPT5H, CCAR2, LUC7L3, FMR1, NAA25, HMG20B, MED13, HNRNPU, CAMK4, MAPK3, RNF20, SMARCA2, FUS, TSHZ3, SOX2, HMGCS1, NTMT1, ARFGEF1, PSMB7, HIST1H4B, SLC4A1AP, DYRK2, YEATS4, ZC3H13, EIF1AD, CREBBP, USF1, USF2, UPF3A, NOTCH3, HDAC4, RNF6, VCP, ETS2, MSL1, TDG, NELFB, HIVEP2, FABP7, HNRNPH1, SMC1A, GLYR1, NKAP, CREBRF, A…	1.87298	7.66102e-08	3.83051e-08	2.08506e-07	102	14.8041	3.26695e-07	MORF4L1, PRPF4B, SNCB, LOC100911483, ESF1, NONO, TOP1, DPY30, RBM8A, TARDBP, DNAJC8, PSIP1, TPT1, SRRM1, RPL11, ACIN1, ARGLU1, HNRNPA2B1, ELL3, HNRNPR, MRPS18B, RPS15, SNRPC, SIVA1, AFTPH, SNRPB2, ZCRB1, CXXC5, BANF1, HNRNPL, HNRNPA3, NPM1, RPL3, HNRNPD, RNF168, MRPS26, YTHDC1, SAP18, HNRNPA1, NDUFV3, PPIG, RNF7, SRSF4, NOLC1, CIRBP, PARP1, UCHL1, CTCF, WBP4, RPS19BP1, SBDS, PCBP2, PSMD4, BRD4, T…	1.6613	0.000164314	8.21635e-06	0.000470849	74	12.8696	0.000969559	EIF6, UQCRC2, DPP3, SEPT4, CNDP2, EZH1, PTPN23, PPIP5K1, CNP, RPS2, PDHB, CTNNBL1, RAD21, PRKACA, NDUFS2, RBBP4, PDXK, OPA1, ENC1, UBR4, STXBP1, MTA1, LAS1L, DECR1, PSMA1, DCAF7, PSMA5, SNRNP200, THOC5, PAF1, UROD, MYO18A, LRPPRC, MATR3, PEG3, PALM, SKIV2L, PEAK1, BRSK1, TRRAP, MTIF2, SCRIB, PSMB3, EIF3L, WDR12, AP3D1, PPP3CA, NDRG2, SETDB1, HTT, PHB, AKAP8L, FDPS, SMC5, ACLY, TKT, DDX5, SMC3, FA…	1.45523	0.396727	0.0111679	1.39514	64	14.5786	5.56666e-05	YLPM1, RPS2, CTNNBL1, JADE2, ACOT7, SMARCD3, NDUFS2, CCAR2, AP5Z1, EXOSC9, MICAL3, ENC1, UBR4, STXBP1, LAS1L, DECR1, MED13, CCND1, SNRNP48, DCAF7, CCND2, UROD, MYO18A, SMARCA2, PEG3, PHLPP1, PALM, SKIV2L, PEAK1, EGLN2, BRSK1, NR3C1, TRRAP, ARFGEF1, SCRIB, ADPRHL2, MTMR3, WDR18, PSMB6, AP3D1, MLLT1, CHD6, YEATS4, CAPN7, TAF1, PDS5B, ZMYM3, AKAP8L, NOTCH3, HDAC4, PPP1R9B, SUGP2, RGD1559904, RPS6KA2…	1.66577	0.0262585	0.00115626	0.0796254	77	13.6042	0.000143291	NKAP, MORF4L1, HMGN3, SLC44A1, FAM96B, PRPF4B, SNCB, SHOC2, CTCF, PTMA, LOC100911483, WBP4, PNN, DPY30, RBM8A, DNAJC8, PCBP2, PSIP1, TPT1, RPL11, RARB, ATP5H, SRPK2, HSP90AA1, HNRNPA2B1, ZFR, NCL, MIEN1, HNRNPU, PFDN2, MRPS18B, ZMIZ2, NCOA6, THOC7, COMMD1, SNRPC, CCDC174, RNF20, SIVA1, HYPK, NDUFB4, POLR2G, BCLAF1, ING2, NDUFB6, SOX2, ZCRB1, NTMT1, SF3B6, BANF1, SF3B2, MIF, HNRNPA3, PSMB7, CEP57,…	1.537	0.066071	0.00341191	0.204784
GOTERM_CC_DIRECT	GO:0005874~microtubule	50	3.42466	3.04583e-11	TUBB2B, TUBB2A, SYNJ1, CNP, CCT3, WDR81, KIFC3, MAP1LC3A, DYNLL1, APOE, DYNLL2, MAPT, DYNC2H1, TUBB5, CDK5RAP3, DYNC1H1, TUBA1B, TUBB3, MT3, ARHGEF2, KIF5B, KIF5A, KIF5C, MTA1, DCTN1, EML2, TBCA, CLIP1, TUBA4A, MAPRE3, DYNLRB1, LRPPRC, EIF3A, TUBGCP5, MACF1, KLC1, HSPA8, TUBB4A, TUBB4B, APC, KIF3A, RMDN1, DPYSL2, CCT5, CCT4, MAP1S, CCT8, MARCKS, DNM1, FEZ1	2.86195	2.30569e-08	1.35629e-09	4.64142e-08																	33	5.73913	4.11186e-13	TUBB2B, SYNJ1, CNP, CCT3, WDR81, KIFC3, EIF3A, MACF1, TUBB5, DYNC2H1, CDK5RAP3, DYNC1H1, TUBA1B, TUBB3, TUBB4A, TUBB4B, APC, ARHGEF2, KIF3A, KIF5B, KIF5A, RMDN1, KIF5C, MTA1, DPYSL2, DCTN1, CCT5, MAP1S, TUBA4A, CLIP1, LRPPRC, DNM1, FEZ1	4.79567	2.14249e-10	3.0607e-11	5.95612e-10	17	3.87244	7.11493e-05	ARHGEF2, KIF3A, KIF5B, RMDN1, KIF5C, KIF18A, DPYSL2, DCTN1, MACF1, MAP1S, TUBB5, CLIP1, TUBA4A, NDRG1, DYNC1H1, TUBB4A, TUBB3	3.26977	0.0334387	0.0014161	0.101761
GOTERM_CC_DIRECT	GO:0015629~actin cytoskeleton																									19	3.30435	1.16732e-05	CGNL1, SRCIN1, ACTN4, CROCC, PEAK1, FSCN1, ACACA, AKAP13, MPRIP, CORO1C, PPP1R9B, PPP1R9A, MACF1, GSN, SVIL, PSMB3, DBN1, SEPT7, MYH10	3.42963	0.00606331	0.000202705	0.0169058	15	3.41686	8.269e-05	CGNL1, ACTN4, CROCC, PEAK1, ACACA, MPRIP, DAPK1, CORO1C, NOTCH3, PPP1R9B, PPP1R9A, MACF1, GSN, DBN1, MYH10	3.58359	0.0387564	0.00157985	0.118258
GOTERM_MF_DIRECT	GO:0003774~motor activity	16	1.09589	5.99606e-06	MYO5A, CGNL1, MYO1B, MYO9B, MYO9A, PIN1, MYO10, DYNLL1, DYNLL2, MYH11, MYO16, MYH14, MYO18A, DYNLRB1, MYO5B, MYH10	3.97529	0.00687772	0.000459993	0.00964291																	10	1.73913	3.71898e-05	MYO5A, CGNL1, MYO1B, MYO16, MYO9B, MYH14, MYO9A, MYO18A, MYO5B, MYH10	5.97545	0.0267839	0.00193734	0.0563847	9	2.05011	3.35809e-05	MYO5A, CGNL1, MYO10, MYO16, MYH11, MYH14, MYO9A, MYO18A, MYH10	7.11538	0.0194864	0.00163855	0.0494248
GOTERM_BP_DIRECT	GO:0007010~cytoskeleton organization	25	1.71233	2.43844e-05	PALM, TUBB2B, TUBB2A, VIM, PAK7, PTK2, ANK3, CNTNAP1, TUBB3, TUBB4A, TUBB4B, PLEC, ZMYM3, SPTBN4, MICAL3, BSN, DPYSL2, MAST2, SVIL, SPTBN2, CDC42BPA, SH3KBP1, SPTBN1, TUBA4A, SPTB	2.6064	0.0884985	0.010243	0.0450544																	20	3.47826	1.03644e-08	PALM, TUBB2B, SPTBN4, VIM, BSN, DPYSL2, PAK7, PTK2, ANK3, SVIL, SPTBN2, CDC42BPA, TUBA4A, SPTBN1, CNTNAP1, TUBB4A, TUBB3, PLEC, TUBB4B, SPTB	5.15008	2.49573e-05	2.49573e-05	1.8206e-05	14	3.18907	6.97741e-06	PALM, ZMYM3, SPTBN4, MICAL3, BSN, DPYSL2, MAST2, SPTBN2, SPTBN1, TUBA4A, TUBB4A, TUBB3, SPTB, PLEC	4.80674	0.0135276	0.00194381	0.0119617
GOTERM_BP_DIRECT	GO:0050885~neuromuscular process controlling balance																									9	1.56522	0.000382306	MYO5A, JPH3, ABR, CNTNAP1, CAMK2B, SHANK1, NEFL, SHANK3, MYH10	5.02788	0.601787	0.0498675	0.669429	10	2.2779	6.72877e-06	MYO5A, JPH3, ABR, GRIN2C, ADCY5, CAMK2B, SHANK1, NEFL, SHANK3, MYH10	7.44871	0.0130487	0.00218671	0.0115355
GOTERM_CC_DIRECT	GO:0030027~lamellipodium	25	1.71233	0.000441827	SRCIN1, STMN2, WASF1, FLOT1, FSCN1, ACTN1, MYO9B, NCKAP1, CORO1C, PPP1R9B, NME2, PPP1R9A, MYO10, PTK2, PLCG1, GSN, SORBS2, PTK2B, CYFIP1, DGKZ, WASL, DBN1, APBB1, MYH10, APC	2.17877	0.28433	0.00641275	0.671168																	20	3.47826	1.30552e-07	SRCIN1, WASF1, FLOT1, FSCN1, ACTN1, MYO9B, NCKAP1, CORO1C, PPP1R9B, PTK2, PPP1R9A, PLCG1, GSN, SORBS2, CYFIP1, DGKZ, DBN1, APBB1, APC, MYH10	4.42533	6.80152e-05	3.77874e-06	0.000189087	13	2.96128	0.000165898	ACTN1, NCKAP1, CORO1C, PPP1R9B, MYO10, PPP1R9A, PLCG1, GSN, SORBS2, DGKZ, PIK3CA, DBN1, MYH10	3.80708	0.0762428	0.00304558	0.237127
GOTERM_CC_DIRECT	GO:0048471~perinuclear region of cytoplasm	86	5.89041	1.01182e-07	HIP1R, TOLLIP, PINK1, PRDX5, CNP, SLIRP, SLK, ATXN10, GSN, PDE4A, PDE4B, PRKACA, PUM2, MT3, STMN3, KIF5B, ACTN4, KIF5A, STMN2, CST3, PRKCG, CDC5L, PRKCE, DCTN3, GAK, TAF10, NME2, PTGDS, GNB2, NME1, IGF2R, SERBP1, USO1, AKAP5, AKAP6, CDK11B, DBN1, MAPRE3, LRPPRC, KALRN, COBL, RAB3B, RAB3C, MTDH, APC2, VIM, AKAP13, MYO9B, MANF, HNRNPL, PTK2, EIF3G, PTK2B, SORBS2, DNAJA1, PTN, NDRG2, HSPA8, MYO5B, H…	1.80953	7.65916e-05	2.83683e-06	0.000154187	40	5.82242	0.000233578	KCNH1, FUS, S100A4, NANOS3, S100A6, HMGB2, AIF1, TRAPPC2L, MRFAP1, RANGAP1, CDH1, ARF5, ARFGEF1, ITM2C, PPP1R16B, PLEKHG5, ANP32A, LMTK2, NDRG1, RAPGEF3, USP33, KLHL20, EHD4, DYNC1I1, DNM1L, HSP90AA1, MAGI2, MAP1B, FMR1, SLC34A1, PCLO, SPAG9, VCP, VAMP8, EIF4A2, BAX, VAMP5, OGFR, CPD, RBM14	1.86714	0.117278	0.0112764	0.338937									49	8.52174	2.28053e-09	TOLLIP, HIP1R, PINK1, CNP, SLK, GSN, ATXN10, PDE4A, PDE4B, PRKACA, PUM2, ACTN4, KIF5B, KIF5A, GAK, GNB2, USO1, AKAP6, DBN1, LRPPRC, KALRN, RAB3B, RAB3C, APC2, VIM, AKAP13, MYO9B, PTK2, SORBS2, NDRG2, HAP1, MYO5B, AATK, PLEC, UNC45A, MYO1B, LRP1, PDE2A, MAP1S, NEDD4, ARF3, TSC2, SPTBN2, MYO16, CYFIP2, CYFIP1, MAPK8IP1, NCOR1, APBB1	2.61763	1.18816e-06	8.48683e-08	3.30305e-06	30	6.83371	0.000213482	APC2, PINK1, ARFGEF1, PPP1R16B, SLK, SORBS2, GSN, PDE4A, LMTK2, NDRG1, PLEC, KIF5B, ACTN4, PRKCG, LRP1, PDE2A, CSNK1D, MAP1S, NEDD4, IGF2R, TSC2, USO1, SPTBN2, MYO16, CYFIP2, OGFR, MAPK8IP1, NCOR1, DBN1, KALRN	2.12113	0.0970205	0.0037727	0.305044
GOTERM_CC_DIRECT	GO:0005622~intracellular																									58	10.087	1.54521e-06	CNOT8, GNA12, PNP, RTN2, TRIM46, ANK3, VPS13D, RAPGEF5, GUCY1A3, RAB6B, AGAP1, VPS11, AGAP2, TUBB3, TBC1D9B, ARHGEF2, ACTN4, RABL6, PIK3CB, PI4KA, ACTN1, PRKCB, MAP4K3, PJA2, TRIM37, PITPNM2, SGSM1, RASGRF1, MAP3K10, GUCY1B3, LRRK2, NYAP1, DBN1, UNC13A, GSTP1, PALM, RAB3B, RABGAP1, TBC1D8, TBC1D9, REN, EFR3A, PEX14, GAD1, NEMF, RAB2B, GDI1, TBC1D2B, ABR, DOCK9, DOCK7, SHANK1, SHANK3, PDE2A, ARF3,…	1.95786	0.000804729	3.83351e-05	0.00223801	41	9.33941	0.000263381	PALM, TBC1D8, TBC1D9, ADCY5, PREX2, NR3C1, RTN2, EVI5, VPS13D, PIK3CA, GUCY1A3, VPS13A, AGAP1, TUBB3, ARHGEF2, ABR, ACTN4, RABL6, IPO13, DOCK9, PI4KA, ACTN1, DOCK7, SHANK1, SHANK3, DDIT4, PRKCB, CAPN15, DCAF4, PITPNM2, CCND1, PDE2A, RASGRF1, MAP3K10, DGKZ, GUCY1B3, LRRK2, DBN1, GSTP1, UNC13A, CDC42BPB	1.83177	0.118308	0.00448679	0.37622
GOTERM_BP_DIRECT	GO:0046777~protein autophosphorylation																																	16	3.64465	2.35968e-05	TAF1, CSNK1G2, PEAK1, MINK1, HK1, PRKCG, BRSK1, DAPK1, SLK, ULK2, LMTK2, JAK1, CAMK2B, MTOR, LRRK2, CAMK2A	3.78042	0.0450167	0.00574113	0.0404476
GOTERM_CC_DIRECT	GO:0005634~nucleus	502	34.3836	2.62105e-19	SCAF1, RPL18, RPL17, TUBB2B, RPL13, TUBB2A, RPL15, PGAM1, RP9, CITED2, LSM4, PDHA1, RPL12, DHX30, HIGD1A, MAGI3, ROCK2, PIK3CB, UXT, GLUL, RPS18, NME2, SPAG7, DCAF7, NME1, EIF2S2, FOXG1, RPS13, ZNHIT1, PUS1, CHCHD1, AHCTF1, NFKBIA, NAA38, MANF, RPS25, PFN1, RPS27, PFN3, NTHL1, TUBB4A, TUBB4B, RPS24, UNC45A, FRA10AC1, RPSA, ZC3H15, PHB, MPC2, VDAC2, VDAC3, SFMBT1, RPS8, VDAC1, RPS7, SRSF4, UPF3B, …	1.40079	1.98413e-16	1.98413e-17	3.99411e-16	247	35.9534	2.61121e-14	S100A4, HMGN3, MEF2A, S100A6, ADCY1, S100A8, AIF1, RNASEH1, RANGAP1, NSRP1, CD44, TRAK2, RPLP0, RARB, SUPT5H, LUC7L3, CCAR2, TYRO3, MAGI2, SUCLG2, RXRB, MED13, NAV3, MED19, DCAF6, MAPK6, CAMK4, BAZ1B, MAPK3, ANAPC7, ST18, FUS, HMGCS1, CHCHD2, ADAP1, SLC4A1AP, PABPC1, RECQL4, YEATS4, ESRRA, EIF1AD, CREBBP, S100A11, USF1, USF2, PTPN11, NOTCH3, UPF3A, RNF6, ETS2, RWDD3, ZFHX2, NKAP, FAM96B, PPARD, F…	1.52902	1.39322e-11	1.39322e-11	3.79141e-11	252	36.5747	1.1144e-12	RPL18, RPL17, CHMP5, RPL13, RPL15, RP9, LUZP1, CITED2, NONO, H2AFV, APOE, RBM8A, H2AFZ, LSM4, RPL12, HIGD1A, S100A1, HCFC1R1, DPCD, NME2, RPS18, SPAG7, NME1, SERBP1, EIF2S2, FOXG1, ZNHIT1, RPS13, MRPL44, CDV3, GPBP1L1, CHCHD1, TXN1, NAA38, BANF1, MANF, PIN1, RPS25, HNRNPA3, PFN1, RPS27, PFN3, DRAP1, NTHL1, RPS24, FRA10AC1, ZC3H15, SUB1, LGALS1, YTHDC1, MPC2, HNRNPA1, NOP10, S100A13, RPS8, RPS7, N…	1.47863	5.60564e-10	6.2285e-11	1.60619e-09	185	32.1739	1.79076e-05	EIF6, SCAF1, CNOT8, TUBB2B, HIRA, PTPN23, PGAM1, RPS6KB2, INO80, CNP, PNP, PDHB, CTNNBL1, PDE4A, ZFP131, PDE4B, RAPGEF5, PRKACA, PDHA1, DHX30, GNL1, EIF2B5, MCM3AP, ANAPC2, PDXK, ACTN4, CSNK1G2, PIK3CB, ROCK2, ENC1, UBR4, MTA1, ACTN1, EEF2, HDAC11, STK4, PSMA1, GLUL, DCAF7, KDM2A, PSMA5, PSMA4, AKAP6, PDE4DIP, SMARCA1, SEPT7, LRPPRC, SMARCA4, PALM, PUS1, SSH3, AHCTF1, AKAP13, TRRAP, TTC3, PSMB4, …	1.31064	0.00928654	0.00030092	0.0259337	138	31.4351	0.000397811	GRIK4, CTNNBL1, TRAK2, SMARCD3, ZFP131, RPLP0, PDE4A, PDHA1, CCAR2, AP5Z1, MCM3AP, ACTN4, CSNK1G2, CMAS, SUCLG2, ENC1, ANAPC4, UBR4, ACTN1, EEF2, MED13, HDAC11, ASCL2, DCAF7, PSMA4, PDE4DIP, SMARCA2, SMARCA4, PALM, TRRAP, TTC3, PSMB4, PPP1R16B, PSMB6, TTBK1, NDRG1, TUBB4A, RPSA, TAF1, YEATS4, SMG6, CPNE7, AKAP8L, CTR9, NOTCH3, HDAC4, PSMC5, NEDD4, TSC2, PSMC1, PPRC1, SPTBN1, WDR3, HIVEP2, NSMF, M…	1.29397	0.173199	0.00653686	0.567734	194	34.2756	9.49864e-08	RPL17, HMGN3, S100A8, CHMP5, SNRPD2, CBX3, TCEAL8, LUZP1, SRP19, CBX5, DPY30, IMP3, RBM8A, APOE, PVALB, H2AFZ, TPT1, PSIP1, RARB, HIGD1A, S100A1, AKIRIN2, RPS27A, MTUS2, NUDT3, MAGOH, HNRNPA2B1, HCFC1R1, BASP1, ZFP593, HNRNPU, MED19, HSPB9, UXT, RPS18, NME2, RPAIN, NME1, EIF2S2, EDF1, ZNHIT1, RPS13, ST18, SNRPC, SNRPE, RNF20, UBA52, HMGB1, CDV3, EEF1B2, CHCHD1, SOX2, BEX1, BEX2, TXN1, NTMT1, NAA3…	1.39507	4.53075e-05	4.11895e-06	0.000135878
GOTERM_BP_DIRECT	GO:0090630~activation of GTPase activity	16	1.09589	0.000203255	TBC1D2B, RABGAP1, TBC1D8, TBC1D9, RALGAPB, DOCK7, SCRIB, CORO1C, SGSM1, SGSM2, RASGRF1, PTK2B, SIPA1L1, IQSEC3, BCAS3, TBC1D9B	3.00727	0.538119	0.037886	0.374962																	14	2.43478	1.81225e-07	CORO1C, TBC1D2B, SGSM1, RABGAP1, TBC1D8, RASGRF1, TBC1D9, SIPA1L1, RALGAPB, DOCK7, BCAS3, IQSEC3, SCRIB, TBC1D9B	6.49926	0.000436295	0.000145453	0.000318336	10	2.2779	3.13776e-05	CORO1C, EVI5, TBC1D8, RASGRF1, TBC1D9, SIPA1L1, RALGAPB, DOCK7, IQSEC3, SCRIB	6.18977	0.059412	0.00678245	0.0537815
GOTERM_CC_DIRECT	GO:0030426~growth cone	34	2.32877	7.88343e-09	SNCB, USP9X, CRMP1, PTK2B, KLC1, MAPT, NDRG2, NEFL, HAP1, APC, NGEF, STMN3, PTPRF, STMN2, FSCN1, DPYSL2, BASP1, HNRNPR, SHANK2, PPP1R9B, PPP1R9A, RASGRF1, TENM2, TSC2, MARCKS, MYH14, TNK2, LRRK2, DBN1, APBB1, CALM2, GAP43, MYH10, CALM1	3.10328	5.96774e-06	2.84179e-07	1.20132e-05																	20	3.47826	6.19006e-08	NGEF, USP9X, FSCN1, DPYSL2, SHANK2, PPP1R9B, PPP1R9A, CRMP1, RASGRF1, TENM2, TSC2, NDRG2, MYH14, LRRK2, DBN1, APBB1, NEFL, HAP1, APC, MYH10	4.63463	3.22497e-05	1.89707e-06	8.96549e-05	12	2.73349	0.000436907	PPP1R9B, PPP1R9A, RASGRF1, TSC2, DPYSL2, MYH14, TNK2, LRRK2, NEFL, DBN1, SHANK2, MYH10	3.68045	0.188513	0.00693872	0.623368
GOTERM_BP_DIRECT	GO:0060999~positive regulation of dendritic spine development																																	7	1.59453	4.01762e-05	PALM, PPP1R9A, NR3C1, MTOR, SHANK1, SHANK3, KALRN	10.608	0.0754291	0.00710424	0.0688575
GOTERM_MF_DIRECT	GO:0004712~protein serine/threonine/tyrosine kinase activity																																	6	1.36674	0.000161298	ACVR2B, RPS6KA2, TESK1, DSTYK, PRKCG, TNK2	11.1371	0.0901982	0.00724505	0.237193
GOTERM_BP_DIRECT	GO:0051056~regulation of small GTPase mediated signal transduction	8	0.547945	0.000197964	RAP1GAP, SIPA1L1, RALGAPB, TSC2, CDC42BPA, SIPA1L2, IQSEC3, ARHGAP26	5.931	0.528737	0.038823	0.365218																	7	1.21739	1.02026e-05	RAP1GAP, SIPA1L1, RALGAPB, TSC2, CDC42BPA, SIPA1L2, IQSEC3	12.818	0.0242687	0.00408631	0.0179202	6	1.36674	3.94376e-05	RAP1GAP, SIPA1L1, RALGAPB, TSC2, SIPA1L2, IQSEC3	14.6491	0.0740951	0.00766881	0.067592
GOTERM_CC_DIRECT	GO:0015630~microtubule cytoskeleton	24	1.64384	0.00125034	HYPK, KIF3A, APC2, MYCBP2, MFN2, EML2, OFD1, MAST2, MACF1, MAP1S, TBCA, LYST, KIFAP3, MAPT, AAMP, CLIP1, MAP7D1, MAP9, MAP7D2, MAPRE3, SEPT7, TUBB3, FEZ1, SPTAN1	2.06498	0.612135	0.015661	1.88847																	13	2.26087	0.0021815	KIF3A, APC2, MYCBP2, MFN2, MACF1, MAP1S, LYST, KIFAP3, CLIP1, SEPT7, TUBB3, FEZ1, SPTAN1	2.83982	0.679477	0.0220628	3.11357	12	2.73349	0.000717864	MAST2, KIF3A, APC2, MACF1, MAP1S, KIFAP3, KIF18A, CLIP1, NDRG1, TUBB3, SPTAN1, MYCBP2	3.46946	0.290548	0.0110119	1.02232
GOTERM_CC_DIRECT	GO:0001725~stress fiber																									8	1.3913	0.00386311	PTK2, ACTN4, FSCN1, ACTN1, MYH14, SEPT7, MPRIP, MYH10	3.97638	0.86689	0.0353697	5.45181	8	1.82232	0.000785472	ACTN4, MYH11, ACTN1, MYH14, DAAM1, FLNB, MPRIP, MYH10	5.26286	0.313125	0.011669	1.1181
KEGG_PATHWAY	rno04921:Oxytocin signaling pathway																																	14	3.18907	0.000279695	ADCY5, PPP1R12C, PIK3CD, PRKCG, EEF2, PRKCB, CCND1, PPP3CB, PIK3CA, RYR2, GUCY1A3, CAMK2B, GUCY1B3, CAMK2A	3.32073	0.0604748	0.0123986	0.356224
KEGG_PATHWAY	rno04066:HIF-1 signaling pathway																									11	1.91304	0.00227283	PLCG1, PIK3CB, RPS6KB2, HK1, CAMK2B, PDHA1, MTOR, CAMK2A, PDHB, ENO1, PRKCB	3.17716	0.39658	0.0292771	2.85901	11	2.50569	0.000376255	PLCG1, PIK3CD, PIK3CA, HK1, EGLN2, PRKCG, CAMK2B, PDHA1, MTOR, CAMK2A, PRKCB	4.01407	0.0804959	0.0138894	0.478934
KEGG_PATHWAY	rno04150:mTOR signaling pathway																																	9	2.05011	0.000195223	RPS6KA2, ULK2, PIK3CD, TSC2, PIK3CA, PRKCG, MTOR, DDIT4, PRKCB	5.50905	0.0426047	0.0144082	0.248763
KEGG_PATHWAY	rno04540:Gap junction																									11	1.91304	0.000624722	TUBB2B, TUBB5, GUCY1A3, TUBA4A, PRKACA, GUCY1B3, TUBA1B, TUBB4A, TUBB3, TUBB4B, PRKCB	3.75483	0.129538	0.0106149	0.793475	10	2.2779	0.000467438	CSNK1D, ADCY5, TUBB5, GUCY1A3, TUBA4A, PRKCG, GUCY1B3, TUBB4A, TUBB3, PRKCB	4.31264	0.0990117	0.0147843	0.594681
KEGG_PATHWAY	rno05214:Glioma																																	9	2.05011	0.000272483	CCND1, PLCG1, PIK3CD, PIK3CA, PRKCG, CAMK2B, MTOR, CAMK2A, PRKCB	5.25478	0.0589622	0.0150782	0.347054
GOTERM_CC_DIRECT	GO:0005883~neurofilament	5	0.342466	0.00435841	PCP4, NEFH, NEFL, SHANK2, NEFM	6.75419	0.963357	0.0431293	6.43943																	4	0.695652	0.00252488	NEFH, NEFL, SHANK2, NEFM	13.7185	0.732096	0.0250113	3.59536	4	0.911162	0.00112696	NEFH, NEFL, SHANK2, NEFM	18.1569	0.416664	0.0157277	1.60057
GOTERM_CC_DIRECT	GO:0030018~Z disc																									12	2.08696	0.000615693	SPHKAP, NOS1AP, ACTN4, ANK3, PDE4B, PPP3CB, RYR2, ACTN1, ACTN2, PPP3CA, NEXN, SPTAN1	3.51757	0.274486	0.00726608	0.888059	10	2.2779	0.00111893	HDAC4, ACTN4, XIRP2, PPP3CB, RYR2, ACTN1, ACTN2, FBXL22, NEXN, SPTAN1	3.87967	0.414418	0.0160859	1.58925
GOTERM_MF_DIRECT	GO:0030374~ligand-dependent nuclear receptor transcription coactivator activity																																	7	1.59453	0.000402955	ACTN4, SMARCD3, HELZ2, PPRC1, ACTN1, ACTN2, PRKCB	7.11538	0.210361	0.0167284	0.591573
GOTERM_MF_DIRECT	GO:0008017~microtubule binding	29	1.9863	0.00190747	LZTS1, APC2, WDR81, RPS3, KIFC3, SBDS, TUBGCP5, MACF1, MAP1LC3A, MAPT, TPT1, PEX14, APC, ARHGEF2, OPA1, KIF3A, KIF5B, KIF5A, KIF5C, DPYSL2, DCTN1, ARL3, EML2, MAST2, MAP1S, CLIP1, CLIP2, MAPRE3, DNM1	1.85277	0.88893	0.0487186	3.02401																	19	3.30435	9.62661e-05	ARHGEF2, OPA1, LZTS1, KIF3A, APC2, KIF5B, KIF5A, KIF5C, DPYSL2, WDR81, DCTN1, KIFC3, MACF1, MAP1S, CLIP1, PEX14, CLIP2, DNM1, APC	2.91944	0.067865	0.0038967	0.145891	15	3.41686	0.000434713	ARHGEF2, LZTS1, KIF3A, APC2, KIF5B, KIF5C, KIF18A, DPYSL2, DCTN1, MAST2, MACF1, MAP1S, CLIP1, NDRG1, CLIP2	3.04945	0.224927	0.016843	0.638059
KEGG_PATHWAY	rno04070:Phosphatidylinositol signaling system	21	1.43836	0.000161985	PIK3C2A, PIK3CB, SYNJ1, PIK3CD, PI4KA, PIP5K1C, PPIP5K1, PRKCG, ITPKA, PRKCB, MTM1, PLCG1, DGKG, PIK3C3, DGKZ, INPP5D, INPP4A, MTMR6, CALM2, MTMR4, CALM1	2.52879	0.0398458	0.00290017	0.210361																	13	2.26087	7.17289e-05	PIK3C2A, PIK3CB, SYNJ1, PI4KA, PPIP5K1, PIP5K1C, ITPKA, PRKCB, MTM1, PLCG1, PIK3C3, DGKZ, INPP4A	4.06773	0.0157983	0.00317981	0.0914009	11	2.50569	0.000195025	MTMR3, PLCG1, PIK3C3, PIK3CD, PI4KA, PIK3CA, DGKZ, PIP5K1C, PRKCG, ITPKA, PRKCB	4.34858	0.0425625	0.0215127	0.248511
KEGG_PATHWAY	rno04724:Glutamatergic synapse																																	11	2.50569	0.000837178	DLGAP1, GRIN2C, ADCY5, GRIK4, GRIK5, PPP3CB, PRKCG, SHANK1, SHANK2, SHANK3, PRKCB	3.63012	0.170364	0.0230757	1.06276
KEGG_PATHWAY	rno04919:Thyroid hormone signaling pathway																																	11	2.50569	0.000837178	NOTCH3, CCND1, PLCG1, PIK3CD, TSC2, PIK3CA, PRKCG, MED13, MTOR, NCOR1, PRKCB	3.63012	0.170364	0.0230757	1.06276
GOTERM_MF_DIRECT	GO:0019901~protein kinase binding	53	3.63014	0.000562219	SRCIN1, PGAM1, PTPN23, CSPG4, RPS3, GSTM1, MAPT, PRKACA, CDK5RAP3, AGAP2, SLC12A7, ELP2, DAB2IP, STXBP1, EEF2, CDC5L, PRKCE, RPS18, RASGRF1, NME1, SIPA1L1, PRKRIP1, AKAP5, PEBP1, RYR2, GSTP1, MYO5A, VIM, BRSK1, LLGL1, PTK2, RB1CC1, NPM1, GYS1, PKD1, NEFH, CAMK2B, EXOC2, TRAF3, APC, EEF1A2, DPYSL2, VDAC1, HDAC5, PPP1R9A, PLCG1, AP2A1, RHEB, MAPK8IP1, MTOR, PARP1, DNM1, CALM1	1.62347	0.476541	0.0213454	0.900382																	36	6.26087	3.01905e-07	MYO5A, SRCIN1, VIM, PTPN23, PGAM1, BRSK1, GSTM1, PTK2, RB1CC1, GYS1, NEFH, PKD1, CDK5RAP3, CAMK2B, PRKACA, AGAP2, EXOC2, APC, SLC12A7, DAB2IP, ELP2, STXBP1, EEF2, DPYSL2, VDAC1, HDAC5, PPP1R9A, PLCG1, AP2A1, RASGRF1, SIPA1L1, RYR2, MAPK8IP1, MTOR, DNM1, GSTP1	2.65212	0.000220366	2.20388e-05	0.000457847	23	5.23918	0.000667172	MYO5A, DAB2IP, PPP1R12C, STXBP1, EEF2, DPYSL2, BRSK1, LLGL1, CAMK2N1, HDAC4, PPP1R9A, CCND1, PLCG1, CCND2, RASGRF1, SIPA1L1, NEFH, RYR2, CAMK2B, MAPK8IP1, MTOR, GSTP1, TRAF3	2.24183	0.323683	0.024147	0.977695
GOTERM_CC_DIRECT	GO:0005876~spindle microtubule																																	6	1.36674	0.00195466	KIF3A, CSNK1D, KIFAP3, BIRC7, TUBG1, NCOR1	6.64275	0.60751	0.0263674	2.76089
KEGG_PATHWAY	rno01200:Carbon metabolism	27	1.84932	9.86081e-06	ME3, GLUD1, ALDOC, OGDHL, PGAM1, HK1, HADHA, PDHB, GOT2, ACSS1, IDH2, PDHA1, SUCLA2, ENO1, FH, DLST, ACO2, ACADS, SUCLG1, SDSL, IDH3B, TKT, PFKM, GPI, SDHD, MDH1, PC	2.57954	0.00247202	0.000206235	0.0128174																	18	3.13043	4.20299e-07	ACO2, GLUD1, ALDOC, OGDHL, PGAM1, HK1, TKT, PFKM, HADHA, PDHB, GOT2, GPI, IDH2, PDHA1, SUCLA2, FH, ENO1, PC	4.46855	9.3302e-05	4.66521e-05	0.000535793	11	2.50569	0.0012404	GOT2, DLST, SUCLG2, GLUD1, OGDHL, IDH2, HK1, PDHA1, SUCLA2, HADHA, PC	3.45011	0.241779	0.0272985	1.57091
KEGG_PATHWAY	rno04530:Tight junction																																	12	2.73349	0.00121986	EPB41L1, ACTN4, MYH11, EXOC3, ACTN1, PRKCG, ACTN2, MYH14, LLGL1, PPP2R2A, MYH10, PRKCB	3.20715	0.238293	0.029791	1.54508
GOTERM_BP_DIRECT	GO:0030036~actin cytoskeleton organization																																	12	2.73349	0.00019917	CORO1C, MK1, ABR, XIRP2, ARHGEF18, SSH2, DAAM1, IQSEC3, FLNB, ITPKA, CDC42BPB, MYH10	4.02571	0.322143	0.0318822	0.340917
GOTERM_MF_DIRECT	GO:0016301~kinase activity																																	12	2.73349	0.00100057	MAP4K4, CCND1, CKMT1B, CSNK1D, AKAP8L, PI4KA, PINK1, CAMK2B, AKAP11, MTOR, LRRK2, CAMK2A	3.32667	0.4438	0.0339189	1.46292
KEGG_PATHWAY	rno00020:Citrate cycle (TCA cycle)	15	1.0274	1.22004e-07	DLST, ACO2, SUCLG1, OGDHL, IDH3B, ACLY, PCK2, PDHB, SDHD, IDH2, PDHA1, SUCLA2, FH, MDH1, PC	5.41883	3.06224e-05	3.06229e-06	0.000158594																	10	1.73913	6.06389e-07	ACO2, OGDHL, IDH2, ACLY, PDHA1, PCK2, SUCLA2, PDHB, FH, PC	9.38707	0.000134609	4.48718e-05	0.000773018	7	1.59453	0.000154762	DLST, SUCLG2, OGDHL, IDH2, PDHA1, SUCLA2, PC	8.30183	0.0339258	0.0339258	0.197253
KEGG_PATHWAY	rno04810:Regulation of actin cytoskeleton																									19	3.30435	0.000318001	GIT1, ACTN4, APC2, ROCK2, PIK3CB, WASF1, SSH3, GNA12, SSH2, ACTN1, PIP5K1C, ACTN2, NCKAP1, PAK7, PTK2, GSN, CYFIP2, CYFIP1, APC	2.61804	0.0681723	0.00639829	0.404629	15	3.41686	0.00172356	GIT1, ACTN4, APC2, PPP1R12C, PIK3CD, SSH2, ACTN1, PIP5K1C, ACTN2, NCKAP1, MK1, GSN, CYFIP2, PIK3CA, ITGAD	2.61132	0.319336	0.0343671	2.17663
GOTERM_CC_DIRECT	GO:0005759~mitochondrial matrix	30	2.05479	5.08632e-06	GLRX5, TARS2, GLUD1, ACOT2, PDHB, GLRX2, RPS3, GOT2, ACSS1, BLOC1S1, HSPE1, ETFB, ECI1, ACADS, FDXR, FDPS, NDUFA10, ACADL, PARK7, UQCC2, TST, ISCU, ISCA2, PDE2A, PAM16, ALDH2, ABAT, LRRK2, PMPCA, PC	2.54875	0.00384295	0.000120316	0.00775055																	16	2.78261	6.4749e-05	ECI1, TARS2, GLUD1, FDXR, FDPS, ACOT2, ACADL, NDUFA10, PDHB, GOT2, TST, PDE2A, ABAT, LRRK2, PMPCA, PC	3.4512	0.0331726	0.000936653	0.0937396	11	2.50569	0.0027574	TST, GOT2, TARS2, PDE2A, GLUD1, OXCT1, ABAT, LRRK2, NDUFA10, CCAR2, PC	3.14034	0.732827	0.0350431	3.87406
GOTERM_CC_DIRECT	GO:0030864~cortical actin cytoskeleton																									7	1.21739	0.0016303	PPP1R9B, PPP1R9A, GSN, FLOT1, AKAP13, ACTN1, ACTN2	5.45623	0.572619	0.0179242	2.3355	6	1.36674	0.0026845	PPP1R9B, PPP1R9A, GSN, ACTN1, ACTN2, LLGL1	6.18984	0.723327	0.0350627	3.77346
GOTERM_CC_DIRECT	GO:0001726~ruffle	15	1.0274	0.005043	MYO5A, COBL, MTM1, NME2, MYO10, PSD, PLCG1, S100B, GSN, BAIAP2, FSCN1, ACTN1, MYO9B, ATP6V1B2, GAS7	2.30257	0.97823	0.0478825	7.41497																	9	1.56522	0.00409034	MYO5A, MTM1, PLCG1, PSD, GSN, FSCN1, ACTN1, MYO9B, ATP6V1B2	3.50758	0.881807	0.0355467	5.7637	8	1.82232	0.00324113	MYO5A, MYO10, PLCG1, PSD, GSN, KIF18A, ACTN1, ATP6V1B2	4.12656	0.788128	0.0400136	4.53911
GOTERM_CC_DIRECT	GO:0016363~nuclear matrix	20	1.36986	2.60591e-05	ENC1, SPTBN4, VIM, ZFP703, AKAP8L, LMNA, AHCTF1, SMC3, NONO, PPIG, DCAF7, PSMA6, SFPQ, PHB2, NPM1, SPTBN2, NSMF, PHF5A, MATR3, NCOR2	3.00186	0.0195337	0.000533019	0.039703																	12	2.08696	5.96772e-05	DCAF7, PHB2, ENC1, VIM, SPTBN4, AKAP8L, SPTBN2, AHCTF1, NSMF, SMC3, NCOR2, MATR3	4.57284	0.0306143	0.00088797	0.0863999	8	1.82232	0.00367515	DCAF7, ENC1, SPTBN4, AKAP8L, SPTBN2, NSMF, ARFGEF1, NCOR2	4.03486	0.827948	0.0441241	5.13218
GOTERM_CC_DIRECT	GO:0030175~filopodium	13	0.890411	0.00438669	PALM, SRCIN1, MYO1B, BAIAP2, FSCN1, ACTN2, PPP1R9B, MTM1, MYO10, PPP1R9A, TENM2, DYNC1H1, DBN1	2.54506	0.964136	0.0428449	6.47992																	11	1.91304	2.91633e-05	MTM1, PALM, PPP1R9B, PPP1R9A, SRCIN1, MYO1B, TENM2, FSCN1, ACTN2, DYNC1H1, DBN1	5.46753	0.0150794	0.000474709	0.0422309	7	1.59453	0.00405581	PALM, PPP1R9B, PPP1R9A, MYO10, ACTN2, DYNC1H1, DBN1	4.605	0.856672	0.046276	5.64952
GOTERM_CC_DIRECT	GO:0030863~cortical cytoskeleton																																	5	1.13895	0.00400697	ACTN4, SPTBN1, NSMF, SPTAN1, SPTB	7.56536	0.853273	0.0468467	5.58328
KEGG_PATHWAY	rno00190:Oxidative phosphorylation	74	5.06849	2.50186e-40	ATP5D, UQCRC2, ATP5E, UQCRC1, ATP5B, CYC1, NDUFAB1, UQCRFS1, COX5A, LOC100911483, UQCRQ, COX5B, NDUFS6, UQCR10, NDUFS5, NDUFS4, UQCR11, NDUFS8, ATP5L, ATP5O, ATP5I, NDUFS3, COX17, ATP5H, NDUFS2, NDUFS1, ATP5J, NDUFB11, NDUFB10, NDUFC2, COX4I1, NDUFA10, NDUFA12, NDUFA11, ATP6V1F, COX6C, ATP6V1A, UQCRH, UQCRB, NDUFB3, NDUFB4, NDUFB5, NDUFB6, NDUFB7, NDUFB8, NDUFB9, COX7B, COX7C, ATP5G2, ATP6V1G1, A…	5.94065	6.27968e-38	3.13984e-38	3.2522e-37									59	8.56313	5.47605e-43	ATP5D, ATP5E, NDUFAB1, UQCRFS1, COX5A, UQCRQ, COX5B, LOC100911483, NDUFS6, NDUFS5, UQCR10, NDUFS4, UQCR11, NDUFS8, ATP5L, ATP5O, ATP5I, COX17, ATP5H, ATP5J, NDUFB11, NDUFB10, NDUFC2, COX4I1, NDUFA12, NDUFA11, ATP6V1F, COX6C, UQCRH, UQCRB, NDUFB3, NDUFB4, NDUFB5, NDUFB6, NDUFB7, NDUFB8, NDUFB9, COX7B, COX7C, ATP5G2, COX7A2L, ATP5G1, ATP6V1G1, ATP5G3, ATP6V0B, NDUFB2, LOC688869, NDUFA4, NDUFA5, ATP…	9.65951	8.98072e-41	4.49036e-41	6.64015e-40																	53	9.36396	1.35277e-40	ATP5D, ATP5E, NDUFAB1, UQCRFS1, COX5A, UQCRQ, COX5B, LOC100911483, NDUFS6, NDUFS5, UQCR10, NDUFS4, UQCR11, ATP5L, ATP5O, ATP5I, COX17, ATP5H, ATP5J, NDUFB11, NDUFC2, COX4I1, NDUFA12, NDUFA11, ATP6V1F, COX6C, UQCRH, UQCRB, NDUFB3, NDUFB4, NDUFB6, NDUFB7, NDUFB9, COX7B, COX7C, ATP5G2, COX7A2L, ATP5G1, ATP6V1G1, ATP5G3, NDUFB2, NDUFA4, LOC688869, NDUFA5, ATP5J2, NDUFA2, COX7A2, NDUFA6, NDUFA7, COX8A…	10.7246	2.28618e-38	2.28618e-38	1.64871e-37
GOTERM_MF_DIRECT	GO:0044822~poly(A) RNA binding	260	17.8082	1.17964e-65	RPL17, RPL19, MRPL41, RPL14, LSM8, RPL13, RPL15, RP9, CCT3, NONO, GOT2, DDX18, RBM8A, MRPL37, FAU, RPL10, LSM4, LSM3, RPL11, RPL12, DHX30, ROCK2, SUCLG1, RPS18, RPS16, RPS17, ABT1, NME1, RPS14, SERBP1, RPS15, EIF2S2, RPS12, RPS13, RPS10, RPS11, MYO18A, MRPL44, PUS1, CHCHD1, ZCRB1, TXN1, MTIF2, MANF, RPS25, HNRNPA3, PFN1, RPS27, RPS28, MACF1, MRPL54, RPS23, RPS24, UTP23, RPSA, ZC3H15, SUB1, LGALS1…	3.07612	1.35776e-62	1.35776e-62	1.89719e-62	102	14.8472	4.801e-19	S100A4, MRPS35, MRPL42, SURF6, LSM6, EIF5, SNRPD1, NSRP1, PNN, IMP3, AKAP17A, RPLP0, DDX24, RPN1, DDX21, DDX10, MRPL32, SUPT5H, GNL2, CCAR2, LUC7L3, SAMD4B, PABPN1, BST2, RRP7A, MAGOH, FMR1, CSTF2T, HNRNPU, MRPL45, TFB1M, FUS, HMGB2, PRRC2C, EIF3C, TCERG1, HIST1H4B, SPATS2, PABPC1, RPS20, DDX41, ZC3H13, MRPS24, EIF4B, R3HDM1, R3HDM2, VCP, GTF2F1, WDR3, HNRNPH1, SMC1A, HSP90AB1, ABCF1, NKAP, CRNKL…	2.58656	3.56714e-16	3.56714e-16	7.29796e-16	193	28.0116	1.67272e-86	RPL17, RPL19, MRPL41, LSM8, RPL14, RPL13, RPL15, RP9, NONO, DDX18, RBM8A, RPL10, LSM4, FAU, LSM3, RPL11, RPL12, SUCLG1, RPS18, RPS16, ABT1, NME1, RPS17, SERBP1, RPS14, EIF2S2, RPS15, RPS12, RPS13, RPS10, RPS11, MRPL44, CHCHD1, ZCRB1, TXN1, MANF, HNRNPA3, RPS25, PFN1, RPS27, RPS28, MRPL54, RPS23, RPS24, UTP23, ZC3H15, SUB1, LGALS1, YTHDC1, HNRNPA1, RPS5, RPS8, RPS7, NOP14, UPF3B, SRSF4, RPL18A, NO…	5.06023	9.63488e-84	9.63488e-84	2.45668e-83	56	9.73913	0.000600886	TRMT1, CCT3, RPS2, GOT2, MRPL37, PUM2, DHX30, DYNC1H1, ACTN4, ZC3H7B, ROCK2, STXBP1, EEF2, LAS1L, DNAJC21, ZFP598, FAM120A, SNRNP200, EIF4A1, USO1, FARSA, MYO18A, LRPPRC, MATR3, TOP3B, TUFM, MYO5A, PUS1, MTIF2, POLR2B, EIF3D, EIF3A, MACF1, SORBS2, PRPF8, FASN, EIF3L, PLEC, RTCB, ENO1, HSPA9, TES, RPSA, IMMT, FSCN1, WDR6, AKAP8L, FDPS, DDX5, SUGP2, LRP1, PSMC1, PPRC1, SPTBN1, ATP5A1, DNM1	1.59345	0.355177	0.0161197	0.907395									119	21.0247	1.62503e-37	RPL17, RPL19, MRPL41, PRPF4B, LSM8, LSM6, SNRPD2, SRP19, PNN, IMP3, RBM8A, PSIP1, TPT1, RPN1, RPL10, FAU, RPL11, GNL2, RPS27A, RRP7A, SUCLG1, MAGOH, HNRNPA2B1, HNRNPU, RPS18, SEC61B, NME1, RPS17, RPS14, EIF2S2, RPS12, EDF1, RPS13, RPS11, SNRPC, SNRPG, HMGB1, MRPS15, MRPS14, CHCHD1, ZCRB1, TXN1, RPS25, HNRNPA3, RPS27, RPS28, TCERG1, MRPL54, HNRNPD, BTF3, HSPE1, RPS24, MRPS26, ZC3H15, SUB1, MRPS24,…	3.74138	9.39267e-35	9.39267e-35	2.38777e-34
GOTERM_CC_DIRECT	GO:0005739~mitochondrion	296	20.274	2.54804e-53	OXA1L, TARS2, MRPL41, SNCB, MALSU1, PNKD, WDR81, LOC100911483, GOT2, GBF1, TRAK1, MRPL37, PDHA1, DHX30, TMEM14C, HIGD1A, MRPL34, OXR1, MRPL35, MRPL52, MRPL51, OPA1, SUCLG1, GLUL, NME2, NNT, NME3, NME1, RPS14, ABAT, FDX1L, ATPIF1, MDH1, MRPL44, HIGD2A, SIVA1, PUS1, ALDOC, CHCHD1, TXN1, MTIF2, CHCHD6, HADHA, PIN1, IDH2, MRPL54, MRPL55, FAM162A, FAHD2A, GAD1, NTHL1, HAP1, FH, GPD2, GCDH, PHB, ACACA,…	2.49593	1.92886e-50	1.92886e-50	3.88285e-50									167	24.238	4.9311e-39	MRPS36, MRPS34, MRPS33, MRPL41, SNCB, MALSU1, PNKD, NDUFAB1, SRP19, COX5A, LOC100911483, COX5B, MINOS1, UQCR10, CISD1, UQCR11, CISD3, TMEM14C, HIGD1A, MRPL34, MRPL35, OXR1, ARGLU1, MRPL52, RPL35A, MRPL51, SUCLG1, TIMM8B, COX6C, ISCU, NME2, NME3, MRPS18C, MRPS18B, NME1, RPS14, PAM16, FDX1L, ATPIF1, MDH1, HIGD2A, MRPL44, FMC1, SIVA1, MRPS16, MRPS15, NAPG, MRPS14, MRPS12, CHCHD1, COX7B, MRPS11, COX7…	2.96106	2.48034e-36	2.48034e-36	7.10696e-36	99	17.2174	9.27474e-13	SEPT4, TARS2, WDR81, PDHB, GOT2, GBF1, TRAK1, MRPL37, PRKACA, PDHA1, DHX30, OPA1, PYCR2, GLUL, ABAT, LRRK2, LRPPRC, PUS1, ALDOC, GLUD1, MTIF2, HADHA, NDRG4, PSMB3, IDH2, GAD1, FAHD2A, HAP1, FH, AP2M1, GCDH, PHB, FDXR, FDPS, ACACA, VDAC2, VDAC3, VDAC1, TST, NDUFV1, RHOT2, MYH10, PC, UQCRC2, CKMT1B, UQCRC1, WASF1, ATP5B, OGDHL, ACOT2, PINK1, TRMT1, PAK7, SLC25A3, ACAD9, SUCLA2, NDUFS3, NDUFS2, AGAP…	2.11943	4.83217e-10	6.04021e-11	1.34334e-09									144	25.4417	1.72585e-36	SLC44A1, MRPS33, MRPL41, SNCB, MALSU1, PNKD, NDUFAB1, SRP19, COX5A, LOC100911483, COX5B, MINOS1, UQCR10, CISD1, UQCR11, CISD3, RAB24, TMEM14C, MRPL34, HIGD1A, OXR1, RPL35A, SUCLG1, TIMM8B, COX6C, NME2, MRPS18C, MRPS18B, NME1, NBR1, RPS14, PAM16, FDX1L, ATPIF1, FMC1, SIVA1, MRPS16, MRPS15, LOC683897, MRPS14, NAPG, CHCHD1, COX7B, COX7C, TXN1, PIN1, FIS1, TOMM7, BLOC1S1, MRPL54, MRPL55, FAM162A, HSP…	3.12917	8.23228e-34	8.23228e-34	2.46883e-33
KEGG_PATHWAY	rno03010:Ribosome	91	6.23288	2.81938e-51	RPL18, RPL17, RPL36A, RPL19, RPL14, RPL13, RPL15, RPL22L1, RPS2, RPS3, RPS3A, RPLP1, RPL10, FAU, RPL11, RPL12, MRPL34, RPS27A, RPL36AL, MRPL35, RPL35A, MRPS7, RPS4X, RPS18, MRPS18C, MRPS9, RPS16, RPS17, RPS14, RPS15, RPS12, RPS13, RPS10, RPS11, UBA52, MRPS16, MRPS15, MRPS14, MRPS12, MRPS11, RPL35, RPL27A, RPS15A, RPL36, RPL37, RPL38, RPL39, MRPL20, RPS25, MRPL11, RPS26, MRPL13, RPL30, RPS27, MRPL…	6.11614	7.07664e-49	7.07664e-49	3.66494e-48									86	12.4819	3.8207e-73	RPL18, RPL17, RPL36A, RPL19, RPL14, RPL13, RPL15, RPL22L1, RPS3, RPS3A, RPLP1, RPL10, FAU, RPL11, RPL12, MRPL34, RPS27A, RPL36AL, MRPL35, RPL35A, MRPS7, RPS4X, RPS18, MRPS18C, RPS16, RPS17, RPS14, RPS15, RPS12, RPS13, RPS10, RPS11, UBA52, MRPS16, MRPS15, MRPS14, MRPS12, MRPS11, RPL35, RPL27A, RPS15A, RPL36, RPL37, RPL38, RPL39, MRPL20, RPS25, MRPL11, RPS26, MRPL13, RPL30, RPS27, RPS28, MRPL12, RP…	11.7879	6.26595e-71	6.26595e-71	4.6329e-70																	51	9.0106	9.21598e-34	RPL17, RPL19, RPL22L1, RPS3A, RPLP1, RPL10, FAU, RPL11, RPS27A, MRPL34, RPL36AL, RPL35A, MRPS7, RPS18, MRPS18C, RPL41, RPS17, RPS14, RPS12, RPS13, RPS11, UBA52, MRPS16, MRPS15, MRPS14, RPL27A, RPL35, RPS15A, RPL36, RPL38, MRPL20, RPS25, RPL30, RPS27, RPS28, RPL32, MRPL14, RPL31, RPL34, MRPL18, RPS21, RPS24, RPL26, RPL27, RPL24, MRPS21, RPL28, RPS8, RPS7, RPL23, RPL21	8.63993	1.5575e-31	7.7875e-32	1.12321e-30
KEGG_PATHWAY	rno05012:Parkinson's disease	72	4.93151	3.24717e-36	ATP5D, UQCRC2, ATP5E, UQCRC1, ATP5B, CYC1, UCHL1, NDUFAB1, PINK1, UQCRFS1, COX5A, LOC100911483, UQCRQ, COX5B, NDUFS6, UQCR10, NDUFS5, NDUFS4, UQCR11, NDUFS8, ATP5O, PRKACA, NDUFS3, ATP5H, NDUFS2, NDUFS1, ATP5J, NDUFB11, NDUFB10, SLC25A4, NDUFC2, COX4I1, NDUFA10, NDUFA12, NDUFA11, COX6C, UQCRH, LRRK2, UQCRB, NDUFB3, NDUFB4, NDUFB5, NDUFB6, NDUFB7, NDUFB8, NDUFB9, COX7B, COX7C, ATP5G2, COX7A2L, ATP…	5.47587	8.15039e-34	2.7168e-34	4.22103e-33									54	7.83745	1.92751e-35	ATP5D, ATP5E, UCHL1, NDUFAB1, UQCRFS1, COX5A, UQCRQ, COX5B, LOC100911483, NDUFS6, NDUFS5, UQCR10, NDUFS4, UQCR11, NDUFS8, ATP5O, ATP5H, ATP5J, NDUFB11, NDUFB10, NDUFC2, COX4I1, NDUFA12, NDUFA11, COX6C, UQCRH, UQCRB, NDUFB3, NDUFB4, NDUFB5, NDUFB6, NDUFB7, NDUFB8, NDUFB9, COX7B, COX7C, ATP5G2, COX7A2L, ATP5G1, ATP5G3, NDUFB2, NDUFA4, LOC688869, NDUFA5, NDUFA2, COX7A2, NDUFA6, NDUFA7, COX8A, PARK7,…	8.3756	3.16111e-33	1.0537e-33	2.33725e-32	16	2.78261	0.000146962	UQCRC2, UQCRC1, SLC25A4, ATP5B, PINK1, VDAC2, NDUFA10, VDAC3, VDAC1, NDUFV1, PRKACA, ATP5A1, NDUFS3, LRRK2, NDUFS2, NDUFS1	3.16196	0.0321014	0.00325748	0.187185									48	8.48057	4.24621e-33	ATP5D, NDUFB3, ATP5E, NDUFB4, NDUFB6, NDUFB7, NDUFB9, COX7B, COX7C, NDUFAB1, ATP5G2, COX7A2L, ATP5G1, UQCRFS1, COX5A, UQCRQ, LOC100911483, COX5B, ATP5G3, NDUFB2, NDUFS6, NDUFS5, UQCR10, NDUFS4, UQCR11, ATP5O, ATP5H, ATP5J, LOC688869, NDUFA4, NDUFA5, NDUFB11, NDUFA2, COX7A2, NDUFA6, NDUFA7, COX8A, NDUFC2, COX4I1, PARK7, NDUFA12, NDUFA11, COX6C, NDUFV3, UQCRH, SDHD, COX6A1, UQCRB	9.20166	7.1761e-31	1.79402e-31	5.17515e-30
KEGG_PATHWAY	rno05016:Huntington's disease	81	5.54795	3.34955e-34	ATP5D, UQCRC2, ATP5E, CLTA, UQCRC1, ATP5B, AP2S1, CYC1, NDUFAB1, UQCRFS1, COX5A, LOC100911483, UQCRQ, COX5B, NDUFS6, UQCR10, NDUFS5, NDUFS4, UQCR11, NDUFS8, ATP5O, NDUFS3, NDUFS2, ATP5H, NDUFS1, ATP5J, NDUFB11, NDUFB10, SLC25A4, NDUFC2, COX4I1, NDUFA10, NDUFA12, DCTN1, COX6C, NDUFA11, UQCRH, UQCRB, NDUFB3, NDUFB4, POLR2G, NDUFB5, POLR2F, POLR2E, NDUFB6, NDUFB7, POLR2K, NDUFB8, NDUFB9, POLR2J, COX…	4.61268	8.40737e-32	2.10184e-32	4.35412e-31									60	8.70827	2.06991e-34	ATP5D, ATP5E, CLTA, AP2S1, NDUFAB1, UQCRFS1, COX5A, LOC100911483, UQCRQ, COX5B, NDUFS6, UQCR10, NDUFS5, NDUFS4, UQCR11, NDUFS8, ATP5O, ATP5H, ATP5J, NDUFB11, NDUFB10, NDUFC2, COX4I1, NDUFA12, NDUFA11, COX6C, UQCRH, UQCRB, NDUFB3, NDUFB4, POLR2G, NDUFB5, POLR2F, NDUFB6, POLR2E, NDUFB7, NDUFB8, POLR2K, NDUFB9, POLR2J, COX7B, COX7C, ATP5G2, COX7A2L, ATP5G1, ATP5G3, NDUFB2, LOC688869, NDUFA4, NDUFA5,…	6.9682	3.39465e-32	8.48662e-33	2.50993e-31	19	3.30435	0.000130378	UQCRC2, UQCRC1, SLC25A4, HTT, ATP5B, VDAC2, NDUFA10, VDAC3, POLR2B, DCTN1, VDAC1, AP2A1, NDUFV1, ATP5A1, NDUFS3, NDUFS2, HAP1, NDUFS1, AP2M1	2.8115	0.0285309	0.00361169	0.166078									54	9.54064	3.51206e-33	ATP5D, ATP5E, CLTA, NDUFAB1, UQCRFS1, COX5A, UQCRQ, COX5B, LOC100911483, NDUFS6, NDUFS5, UQCR10, NDUFS4, UQCR11, ATP5O, ATP5H, ATP5J, NDUFB11, NDUFC2, COX4I1, NDUFA12, NDUFA11, COX6C, UQCRH, UQCRB, NDUFB3, NDUFB4, POLR2G, NDUFB6, POLR2E, NDUFB7, POLR2K, POLR2J, NDUFB9, COX7B, COX7C, ATP5G2, COX7A2L, ATP5G1, ATP5G3, NDUFB2, NDUFA4, LOC688869, NDUFA5, NDUFA2, COX7A2, NDUFA6, NDUFA7, COX8A, SOD1, ND…	7.75115	5.93539e-31	1.97846e-31	4.28039e-30
KEGG_PATHWAY	rno05010:Alzheimer's disease	74	5.06849	7.82014e-32	ATP5D, UQCRC2, ATP5E, UQCRC1, ATP5B, CYC1, NDUFAB1, UQCRFS1, COX5A, LOC100911483, UQCRQ, COX5B, NDUFS6, UQCR10, NDUFS5, NDUFS4, UQCR11, APOE, MAPT, NDUFS8, ATP5O, PSENEN, NDUFS3, ATP5H, NDUFS2, NDUFS1, ATP5J, NDUFB11, NDUFB10, NDUFC2, COX4I1, NDUFA10, NDUFA12, NDUFA11, COX6C, UQCRH, UQCRB, NDUFB3, NDUFB4, NDUFB5, NDUFB6, NDUFB7, NDUFB8, NDUFB9, COX7B, COX7C, ATP5G2, COX7A2L, ATP5G1, ATP5G3, NDUFB…	4.70029	1.96285e-29	3.92571e-30	1.01655e-28									57	8.27286	4.02324e-34	ATP5D, ATP5E, NDUFAB1, UQCRFS1, COX5A, UQCRQ, COX5B, LOC100911483, NDUFS6, NDUFS5, UQCR10, NDUFS4, UQCR11, APOE, MAPT, NDUFS8, ATP5O, PSENEN, ATP5H, ATP5J, NDUFB11, NDUFB10, NDUFC2, COX4I1, NDUFA12, NDUFA11, COX6C, UQCRH, UQCRB, NDUFB3, NDUFB4, NDUFB5, NDUFB6, NDUFB7, NDUFB8, NDUFB9, COX7B, COX7C, ATP5G2, COX7A2L, ATP5G1, ATP5G3, NDUFB2, NDUFA4, LOC688869, NDUFA5, NDUFA2, COX7A2, NDUFA6, NDUFA7, …	7.38362	6.59811e-32	1.31962e-32	4.87849e-31																	51	9.0106	1.89146e-32	ATP5D, ATP5E, NDUFAB1, UQCRFS1, COX5A, UQCRQ, COX5B, LOC100911483, NDUFS6, NDUFS5, UQCR10, NDUFS4, UQCR11, APOE, PSENEN, ATP5O, ATP5H, ATP5J, NDUFB11, NDUFC2, COX4I1, NDUFA12, NDUFA11, COX6C, UQCRH, UQCRB, NDUFB3, NDUFB4, NDUFB6, NDUFB7, NDUFB9, COX7B, COX7C, ATP5G2, COX7A2L, ATP5G1, ATP5G3, NDUFB2, NDUFA4, LOC688869, NDUFA5, NDUFA2, COX7A2, NDUFA6, NDUFA7, COX8A, NDUFV3, SDHD, COX6A1, CALM2, CAL…	8.16521	3.19656e-30	6.39313e-31	2.30525e-29
KEGG_PATHWAY	rno04932:Non-alcoholic fatty liver disease (NAFLD)	56	3.83562	3.97276e-20	UQCRC2, UQCRC1, CYC1, NDUFAB1, UQCRFS1, COX5A, UQCRQ, COX5B, LOC100911483, NDUFS6, NDUFS5, UQCR10, NDUFS4, UQCR11, NDUFS8, NDUFS3, NDUFS2, NDUFS1, NDUFB11, NDUFB10, PIK3CB, PIK3CD, NDUFC2, COX4I1, NDUFA10, NDUFA12, DDIT3, NDUFA11, COX6C, UQCRH, UQCRB, NDUFB3, NDUFB4, NDUFB5, NDUFB6, NDUFB7, NDUFB8, NDUFB9, COX7B, COX7C, COX7A2L, NDUFB2, LOC688869, NDUFA4, NDUFA5, NDUFA2, COX7A2, NDUFA6, NDUFA7, C…	3.99611	9.97163e-18	1.66194e-18	5.16424e-17									45	6.5312	2.26257e-24	NDUFB3, NDUFB4, NDUFB5, NDUFB6, NDUFB7, NDUFB8, NDUFB9, COX7B, COX7C, NDUFAB1, COX7A2L, UQCRFS1, COX5A, UQCRQ, LOC100911483, COX5B, NDUFB2, NDUFS6, NDUFS5, UQCR10, NDUFS4, UQCR11, NDUFS8, LOC688869, NDUFA4, NDUFA5, NDUFB11, NDUFA2, NDUFB10, COX7A2, NDUFA6, NDUFA7, COX8A, NDUFC2, COX4I1, DDIT3, NDUFA12, NDUFA11, COX6C, NDUFV3, UQCRH, NDUFV2, COX6A2, COX6A1, UQCRB	6.54882	3.71061e-22	6.18434e-23	2.74354e-21																	41	7.24382	4.55967e-24	NDUFB3, NDUFB4, NDUFB6, NDUFB7, NDUFB9, COX7B, COX7C, NDUFAB1, COX7A2L, UQCRFS1, COX5A, UQCRQ, COX5B, LOC100911483, NDUFB2, NDUFS6, NDUFS5, UQCR10, NDUFS4, UQCR11, LOC688869, NDUFA4, NDUFA5, NDUFB11, NDUFA2, COX7A2, NDUFA6, NDUFA7, COX8A, NDUFC2, COX4I1, NDUFA12, NDUFA11, COX6C, NDUFV3, ATF4, UQCRH, BAX, SDHD, COX6A1, UQCRB	7.37458	7.70584e-22	1.28431e-22	5.55718e-21
GOTERM_MF_DIRECT	GO:0003735~structural constituent of ribosome	101	6.91781	2.46378e-26	RPL18, RPL17, RPL36A, MRPS34, RPL19, MRPL41, RPL14, RPL13, RPL15, RPL22L1, RPLP1, RPL10, FAU, MRPL37, RPL11, RPL12, MRPL34, RPS27A, MRPL35, RPL36AL, RPL35A, MRPL51, RPS18, MRPS18C, RPS16, MRPS18B, RPS17, RPS14, RPS15, RPS12, RPS13, RPS10, RPS11, UBA52, MRPS16, MRPS15, MRPS14, MRPS12, MRPS11, RPS25, RPS26, RPS27, RPS28, RPL7, RPS29, RPL6, RPL9, RPL8, RPL3, RPL5, RPL4, RPL10A, RPS21, RPS23, RPS24, …	3.21871	2.83581e-23	9.45271e-24	3.96245e-23									93	13.4978	3.93555e-49	RPL18, RPL17, RPL36A, MRPS34, RPL19, MRPL41, RPL14, RPL13, RPL15, RPL22L1, RPS3, RPS3A, RPLP1, RPL10, FAU, RPL11, RPL12, MRPL34, RPS27A, RPL36AL, MRPL35, RPL35A, MRPL51, MRPS7, RPS4X, RPS18, MRPS18C, RPS16, MRPS18B, LOC297756, RPS17, RPS14, RPS15, RPS12, RPS13, RPS10, RPS11, UBA52, MRPS16, MRPS15, MRPS14, MRPS12, MRPS11, RPL35, RPL27A, RPS15A, RPL36, RPL37, RPL38, RPL39, MRPL20, RPS25, MRPL11, RP…	6.56791	2.26688e-46	1.13344e-46	5.78003e-46																	56	9.89399	6.00885e-22	RPL17, RPL19, MRPL41, RPL22L1, IMP3, RPS3A, RPLP1, RPL10, FAU, RPL11, RPS27A, MRPL34, RPL36AL, RPL35A, MRPS7, RPS18, MRPS18C, RPL41, MRPS18B, RPS17, RPS14, RPS12, RPS13, RPS11, UBA52, MRPS16, MRPS15, MRPS14, RPL35, RPL27A, RPS15A, RPL36, RPL38, MRPL20, RPS25, RPL30, RPS27, RPS28, RPL32, MRPL14, RPL31, RPL34, MRPL18, RPS21, RPS24, MRPS25, MRPS24, RPL26, RPL27, RPL24, MRPS21, RPL28, RPS8, RPS7, RPL…	4.74246	3.47312e-19	1.73656e-19	8.82924e-19
GOTERM_CC_DIRECT	GO:0005743~mitochondrial inner membrane	89	6.09589	4.89014e-29	ATP5D, UQCRC2, ATP5E, OXA1L, UQCRC1, CKMT1B, ATP5B, CYC1, PINK1, CNP, UQCRFS1, COX5A, UQCRQ, COX5B, RPS3, GOT2, MINOS1, UQCR10, UQCR11, GPX4, SLC25A3, ATP5L, NDUFS3, TMEM14C, ATP5H, DNAJC19, HIGD1A, ATP5J, NDUFB10, OPA1, SLC25A4, SUCLG1, NDUFC2, COX4I1, HERC2, TIMM8B, COX6C, ACADVL, NNT, UQCRH, PAM16, TOMM22, LRRK2, PMPCA, UQCRB, TUFM, NDUFB3, NDUFB4, NDUFB5, SAMM50, NDUFB7, NDUFB8, NDUFB9, GLUD1…	3.84104	3.70184e-26	7.40367e-27	7.45189e-26									48	6.96662	2.3696e-17	ATP5D, NDUFB3, ATP5E, NDUFB4, NDUFB5, NDUFB7, NDUFB8, NDUFB9, COX7C, TIMM10, TMEM256, TIMM13, ATP5G1, UQCRFS1, COX5A, UQCRQ, CHCHD6, COX5B, RPS3, MINOS1, UQCR10, UQCR11, GPX4, ATP5L, TMEM14C, ATP5H, DNAJC19, HIGD1A, ATP5J, LOC688869, NDUFA4, ATP5J2, NDUFB10, COX7A2, SUCLG1, NDUFC2, COX4I1, MPC1, MRPS21, MPC2, TIMM8B, COX6C, UQCC2, USMG5, UQCRH, PAM16, TOMM22, UQCRB	4.35602	1.19191e-14	1.70273e-15	3.41519e-14	34	5.91304	1.81474e-10	TUFM, UQCRC2, UQCRC1, CKMT1B, SAMM50, GLUD1, ATP5B, PINK1, CNP, HADHA, GOT2, SLC25A3, ETFDH, IDH2, NDUFS3, ECI1, GCDH, OPA1, SLC25A4, IMMT, PHB, FDXR, HERC2, VDAC2, VDAC3, VDAC1, TST, PHB2, NDUFV1, RHOT2, ATP5A1, LRRK2, PMPCA, PC	3.72548	9.45477e-08	7.87897e-09	2.62841e-07									45	7.95053	1.629e-18	ATP5D, NDUFB3, ATP5E, NDUFB4, NDUFB7, NDUFB9, COX7C, TIMM10, TMEM256, TIMM13, ATP5G1, UQCRFS1, COX5A, UQCRQ, COX5B, MINOS1, DNAJC15, UQCR10, UQCR11, MPV17L2, GPX4, ATP5L, TMEM14C, ATP5H, HIGD1A, ATP5J, LOC688869, NDUFA4, ATP5J2, COX7A2, SUCLG1, NDUFC2, COX4I1, MPC1, MRPS21, MPC2, TIMM8B, COX6C, UQCC2, USMG5, UQCRH, PAM16, SDHD, TOMM22, UQCRB	5.00492	7.77035e-16	2.59012e-16	2.3303e-15
GOTERM_CC_DIRECT	GO:0005747~mitochondrial respiratory chain complex I	32	2.19178	5.41107e-21	NDUFB3, NDUFB4, NDUFB5, NDUFB6, NDUFB7, NDUFB8, NDUFB9, NDUFAB1, LOC100911483, NDUFB2, NDUFS6, NDUFS5, NDUFS4, NDUFS8, NDUFS3, NDUFS2, NDUFS1, NDUFA4, NDUFA5, NDUFB11, NDUFA2, NDUFB10, NDUFA6, NDUFA7, NDUFC2, NDUFA10, PARK7, NDUFA12, NDUFA11, NDUFV3, NDUFV1, NDUFV2	7.71908	4.09618e-18	5.85168e-19	8.2457e-18									27	3.91872	2.27341e-23	NDUFB3, NDUFB4, NDUFB5, NDUFB6, NDUFB7, NDUFB8, NDUFB9, NDUFAB1, LOC100911483, NDUFB2, NDUFS6, NDUFS5, NDUFS4, NDUFS8, NDUFA4, NDUFA5, NDUFA2, NDUFB11, NDUFB10, NDUFA6, NDUFA7, NDUFC2, PARK7, NDUFA12, NDUFA11, NDUFV3, NDUFV2	13.6952	1.14352e-20	2.85881e-21	3.27656e-20																	22	3.88693	1.38482e-18	NDUFB3, NDUFA4, NDUFB4, NDUFA5, NDUFA2, NDUFB11, NDUFB6, NDUFB7, NDUFA6, NDUFB9, NDUFA7, NDUFAB1, NDUFC2, LOC100911483, NDUFA12, PARK7, NDUFA11, NDUFB2, NDUFV3, NDUFS6, NDUFS5, NDUFS4	13.6762	6.60561e-16	3.3028e-16	1.981e-15
GOTERM_CC_DIRECT	GO:0005840~ribosome	57	3.90411	7.68964e-26	RPL18, MRPS34, MRPS33, RPL14, RPS6KB2, RPS2, RPS3, FAU, MRPL37, RPL11, RPL12, RPS27A, MRPL34, MT3, MRPL35, MRPL52, RPS4X, RPS18, MRPS18B, RPS16, MRPS9, RPS17, RPS11, UBA52, MRPL44, RPL36, RPL39, RPS25, MRPL11, RPL30, MRPL13, RPL7, RPL6, RPL34, RPL9, MRPL16, MRPL54, RPL3, MRPL55, MRPL18, RPS21, RPS23, RPS24, MRPS23, MRPS25, RPL27, RPL23A, DENR, RPL28, RPS8, RPL29, RPS7, RPL18A, RPL23, RPL13A, RPS6…	5.16764	5.82105e-23	9.70176e-24	1.17179e-22									51	7.40203	1.54372e-35	RPL18, MRPS34, MRPS33, RPL14, RPL36, RPL39, RPS3, RPS25, MRPL11, MRPL13, RPL30, RPL7, RPL6, RPL9, RPL34, RPL3, MRPL54, MRPL18, MRPL55, FAU, RPL11, RPL12, RPS21, MRPL34, RPS27A, RPS23, RPS24, MRPL35, MT3, MRPL52, MRPS23, MRPS25, RPL27, RPL23A, DENR, RPS4X, RPS8, RPL28, RPS7, RPL29, RPS18, RPS16, MRPS18B, RPL23, RPL18A, RPS17, RPL13A, RPL21, RPS11, UBA52, MRPL44	9.72249	7.76491e-33	3.88246e-33	2.22489e-32																	29	5.12367	1.94956e-15	MRPS33, RPL36, RPS25, RPL30, MRPL14, RPL34, MRPL54, MRPL55, FAU, MRPL18, RPL11, RPS21, MRPL34, RPS27A, RPS24, MT3, MRPS25, RPL27, DENR, RPL28, RPS8, RPS7, RPS18, MRPS18B, RPL23, RPS17, RPL21, RPS11, UBA52	6.7755	9.53237e-13	1.90625e-13	2.85327e-12
GOTERM_BP_DIRECT	GO:0006412~translation	88	6.0274	7.19454e-22	RPL18, RPL17, RPL36A, RPL19, MRPL41, RPL14, RPL13, EIF5B, RPS2, RPS3, RPS3A, SLC25A3, RPL10, MRPL37, FAU, RPL11, RPL12, MRPL34, RPS27A, RPL36AL, MRPL35, MRPL51, SLC25A4, MRPS7, RPS4X, RPS18, MRPS9, RPS16, MRPS18B, LOC297756, RPS17, RPS14, RPS15, RPS12, RPS13, RPS11, UBA52, MRPS14, MRPS12, MRPS11, RPL35, RPL27A, RPS15A, RPL36, RPL37, RPL38, RPL39, MTIF2, MRPL20, MRPL11, RPS26, MRPL13, RPL30, RPS27…	3.10671	2.73393e-18	2.73393e-18	1.3296e-18									79	11.4659	5.0782e-39	RPL18, RPL17, RPL36A, RPL19, MRPL41, RPL14, RPL13, EIF5B, RPS3, RPS3A, RPL10, FAU, RPL11, RPL12, RPS27A, MRPL34, RPL36AL, MRPL35, MRPL51, MRPS7, RPS4X, RPS18, MRPS18B, RPS16, LOC297756, RPS17, RPS14, RPS15, RPS12, RPS13, RPS11, UBA52, MRPS14, MRPS12, MRPS11, RPL35, RPL27A, RPS15A, RPL36, RPL37, RPL38, RPL39, MRPL20, MRPL11, RPS26, MRPL13, RPL30, RPS27, RPS28, MRPL12, RPS29, RPL32, RPL6, RPL34, RP…	6.10787	1.04256e-35	1.04256e-35	8.75773e-36																	46	8.12721	1.57182e-16	RPL17, RPL19, MRPL41, MRPS14, RPL27A, RPL35, RPL36, RPS15A, RPL38, MRPL20, RPL30, RPS27, RPS28, RPL32, MRPL14, RPS3A, RPL34, RPL10, FAU, MRPL18, RPL11, RPS21, RPS27A, MRPL34, RPL36AL, RPS24, MRPS24, RPL26, RPL27, RPL24, MRPS21, MRPS7, RPL28, RPS8, RPS7, RPS18, MRPS18B, RPL41, RPL23, RPS17, RPL21, RPS14, RPS12, RPS13, RPS11, UBA52	4.33717	2.17826e-13	2.17826e-13	1.88738e-13
KEGG_PATHWAY	rno04260:Cardiac muscle contraction	24	1.64384	8.51141e-08	UQCRC2, LOC688869, COX7A2, UQCRC1, COX7B, COX8A, CYC1, COX7C, COX4I1, ATP1A2, COX7A2L, UQCRFS1, COX5A, UQCRQ, COX5B, TPM1, COX6C, UQCR10, UQCR11, UQCRH, COX6A2, RYR2, COX6A1, UQCRB	3.55698	2.13634e-05	2.37373e-06	0.000110641									20	2.90276	3.25665e-10	LOC688869, COX7A2, COX7B, COX8A, COX7C, COX4I1, ATP1A2, COX7A2L, COX5A, UQCRFS1, COX5B, TPM1, UQCRQ, COX6C, UQCR10, UQCR11, UQCRH, COX6A2, COX6A1, UQCRB	6.04507	5.34091e-08	6.67614e-09	3.94895e-07																	19	3.35689	7.74775e-11	LOC688869, COX7A2, COX7B, COX8A, COX7C, COX4I1, COX7A2L, COX5A, UQCRFS1, COX5B, TPM1, UQCRQ, COX6C, TNNT2, UQCR10, UQCR11, UQCRH, COX6A1, UQCRB	7.09786	1.30937e-08	1.87053e-09	9.44272e-08
GOTERM_CC_DIRECT	GO:0022625~cytosolic large ribosomal subunit	44	3.0137	7.49679e-13	RPL18, RPL17, RPL36A, RPL19, RPL14, RPL13, RPL15, RPL27A, RPL35, RPL36, RPL37, RPL22L1, RPL38, RPL39, RPL30, RPL32, RPL7, RPL6, RPL31, RPL9, RPL34, RPLP1, RPL8, RPL3, RPL10, RPL5, RPL11, RPL12, RPL10A, RPL4, RPL36AL, RPL35A, RPL26, RPL27, RPL24, RPL23A, RPL28, RPL29, RPL18A, RPL23, RPL13A, RPL21, RPS12, UBA52	3.45563	5.67548e-10	4.05391e-11	1.14249e-09									44	6.38607	7.09412e-25	RPL18, RPL17, RPL36A, RPL19, RPL14, RPL13, RPL15, RPL27A, RPL35, RPL36, RPL37, RPL22L1, RPL38, RPL39, RPL30, RPL32, RPL7, RPL6, RPL31, RPL9, RPL34, RPLP1, RPL8, RPL3, RPL10, RPL5, RPL11, RPL12, RPL10A, RPL4, RPL36AL, RPL35A, RPL26, RPL27, RPL24, RPL23A, RPL28, RPL29, RPL18A, RPL23, RPL13A, RPL21, RPS12, UBA52	7.26637	3.56834e-22	1.18945e-22	1.02244e-21																	26	4.59364	2.46928e-11	RPL17, RPL19, RPL27A, RPL35, RPL36, RPL22L1, RPL38, RPL30, RPL32, RPL31, RPL34, RPLP1, RPL10, RPL11, RPL36AL, RPL35A, RPL26, RPL27, RPL24, ZCCHC17, RPL28, RPL41, RPL23, RPL21, RPS12, UBA52	5.26228	1.17785e-08	1.96308e-09	3.53232e-08
GOTERM_CC_DIRECT	GO:0071013~catalytic step 2 spliceosome	26	1.78082	1.53308e-08	PRPF4B, CWC15, LSM7, SNRPB2, RBMXRTL, SNRPD2, SF3B6, XAB2, SF3B2, HNRNPA3, RBM8A, PRPF8, SRRM1, LSM3, BCAS2, HNRNPA2B1, ALYREF, CDC5L, DDX5, HNRNPR, HNRNPA1, SNRNP200, PHF5A, SNRPF, SNRPE, SNRPG	3.69703	1.16053e-05	4.83558e-07	2.33619e-05	12	1.74672	0.000317306	TFIP11, PRPF19, CRNKL1, MAGOH, RBMX2, SNRPD1, SYF2, PABPC1, HNRNPH1, DDX41, HNRNPU, PNN	3.78539	0.155886	0.0140231	0.46017	22	3.19303	1.13006e-11	BCAS2, PRPF4B, HNRNPA2B1, CWC15, LSM7, RBMXRTL, ALYREF, SNRPB2, SNRPD2, SF3B6, CDC5L, HNRNPR, HNRNPA1, SF3B2, HNRNPA3, RBM8A, SRRM1, LSM3, PHF5A, SNRPF, SNRPE, SNRPG	6.57798	5.68422e-09	5.16747e-10	1.62871e-08																	19	3.35689	1.85315e-10	BCAS2, PRPF4B, MAGOH, HNRNPA2B1, CWC15, LSM7, SNRPD2, SF3B6, HNRNPU, PNN, SF3B2, HNRNPA3, RBM8A, RBMX2, SYF2, PHF5A, SNRPF, SNRPE, SNRPG	6.96241	8.83954e-08	1.10494e-08	2.65094e-07
GOTERM_CC_DIRECT	GO:0005753~mitochondrial proton-transporting ATP synthase complex	13	0.890411	8.24453e-09	ATP5D, ATP5E, USMG5, ATP5J2, ATP5B, ATP5L, ATP5O, ATPIF1, ATP5G1, ATP5A1, ATP5I, ATP5H, ATP5J	7.98223	6.24109e-06	2.83687e-07	1.25635e-05									11	1.59652	1.18702e-09	ATP5D, ATP5E, USMG5, ATP5J2, ATP5L, ATP5O, ATPIF1, ATP5G1, ATP5I, ATP5H, ATP5J	14.2025	5.97072e-07	4.2648e-08	1.7108e-06																	11	1.94346	1.63784e-10	ATP5D, ATP5E, USMG5, ATP5J2, ATP5L, ATP5O, ATPIF1, ATP5G1, ATP5I, ATP5H, ATP5J	17.406	7.81251e-08	1.11607e-08	2.34294e-07
GOTERM_BP_DIRECT	GO:1902600~hydrogen ion transmembrane transport	19	1.30137	6.35921e-07	NDUFA4, LOC688869, COX7A2, COX7B, COX8A, COX7C, COX4I1, ATP6V1G1, COX7A2L, COX5A, UQCRFS1, UQCRQ, COX6C, UQCR11, UQCRH, COX6A2, SLC25A3, COX6A1, UQCRB	3.96172	0.00241358	0.000483183	0.00117522									18	2.61248	2.90695e-11	NDUFA4, LOC688869, COX7A2, COX7B, COX8A, COX7C, COX4I1, ATP6V1G1, COX7A2L, COX5A, UQCRFS1, UQCRQ, COX6C, UQCR11, UQCRH, COX6A2, COX6A1, UQCRB	8.21953	5.96797e-08	1.98932e-08	5.01325e-08																	17	3.00353	1.58876e-11	NDUFA4, LOC688869, COX7A2, COX7B, COX8A, COX7C, COX4I1, ATP6V1G1, COX7A2L, COX5A, UQCRFS1, UQCRQ, COX6C, UQCR11, UQCRH, COX6A1, UQCRB	9.46694	3.11715e-08	1.55858e-08	2.72547e-08
KEGG_PATHWAY	rno03040:Spliceosome	37	2.53425	5.33644e-10	CCDC12, LSM8, CWC15, ZMAT2, LSM7, SNRPB2, RBMXRTL, SNRPD2, SF3B6, XAB2, SMNDC1, CTNNBL1, SF3B2, HNRNPA3, DDX46, RBM8A, PRPF8, LSM5, LSM4, LSM3, ACIN1, HSPA8, RBM25, BCAS2, ALYREF, CDC5L, DDX5, HNRNPA1, SRSF4, SNRNP200, SNRPC, PHF5A, SNRPF, SNRNP27, THOC2, SNRPE, SNRPG	3.14505	1.33945e-07	1.91349e-08	6.9369e-07									31	4.49927	3.46385e-14	CCDC12, LSM8, CWC15, ZMAT2, LSM7, SNRPB2, RBMXRTL, SNRPD2, SF3B6, SMNDC1, SF3B2, HNRNPA3, DDX46, RBM8A, LSM5, LSM4, LSM3, ACIN1, HSPA8, RBM25, BCAS2, ALYREF, CDC5L, HNRNPA1, SRSF4, SNRPC, PHF5A, SNRPF, SNRNP27, SNRPE, SNRPG	5.37389	5.68079e-12	8.11573e-13	4.19997e-11																	23	4.0636	9.13709e-10	BCAS2, LSM8, MAGOH, LSM6, CWC15, ZMAT2, LSM7, SNRPD2, SF3B6, HNRNPU, SF3B2, HNRNPA3, SRSF4, TCERG1, RBM8A, SYF2, PHF5A, SNRPC, SNRPF, SNRNP27, PRPF40B, SNRPE, SNRPG	4.92785	1.54417e-07	1.93021e-08	1.1136e-06
GOTERM_CC_DIRECT	GO:0000276~mitochondrial proton-transporting ATP synthase complex, coupling factor F(o)	9	0.616438	1.76237e-06	ATP5J2, ATP5L, ATP5O, ATP5G2, ATP5G1, ATP5I, ATP5G3, ATP5H, ATP5J	8.68396	0.00133322	4.3035e-05	0.00268557									9	1.30624	5.56331e-09	ATP5J2, ATP5L, ATP5O, ATP5G2, ATP5G1, ATP5I, ATP5G3, ATP5H, ATP5J	18.2603	2.79834e-06	1.86556e-07	8.01813e-06																	9	1.59011	1.11842e-09	ATP5J2, ATP5L, ATP5O, ATP5G2, ATP5G1, ATP5I, ATP5G3, ATP5H, ATP5J	22.3792	5.33484e-07	5.92761e-08	1.5999e-06
GOTERM_CC_DIRECT	GO:0022627~cytosolic small ribosomal subunit	31	2.12329	1.04396e-10	RPS15A, RPS2, RPS3, RPS25, RPS26, RPS27, RPS28, RPS29, RPS3A, FAU, RPS21, RPS27A, RPS23, RPS24, RPSA, RPS4X, RPS5, RPS8, RPS7, RPS18, MRPS18C, RPS16, LOC297756, RPS17, RPS14, RPS15, RPS12, RPS13, RPS10, RPS11, MCTS1	3.91365	7.90281e-08	4.15938e-09	1.59086e-07									29	4.209	3.26549e-17	RPS15A, RPS3, RPS25, RPS26, RPS27, RPS28, RPS29, RPS3A, FAU, RPS21, RPS27A, RPS23, RPS24, RPS4X, RPS5, RPS8, RPS7, RPS18, MRPS18C, RPS16, LOC297756, RPS17, RPS14, RPS15, RPS12, RPS13, RPS10, RPS11, MCTS1	7.69853	1.64254e-14	2.05318e-15	4.7064e-14																	19	3.35689	1.40723e-09	RPS15A, RPS8, RPS7, RPS25, RPS27, RPS18, MRPS18C, RPS28, RPS3A, RPS17, RPS14, RPS12, FAU, RPS13, RPS11, RPS21, MCTS1, RPS27A, RPS24	6.18158	6.71246e-07	6.71247e-08	2.01304e-06
GOTERM_MF_DIRECT	GO:0004129~cytochrome-c oxidase activity	13	0.890411	1.53422e-06	NDUFA4, LOC688869, COX7A2, COX7B, COX8A, COX7C, COX4I1, COX7A2L, COX5A, COX5B, COX6C, COX6A2, COX6A1	5.45049	0.00176433	0.000135828	0.00246743									13	1.88679	2.23071e-10	NDUFA4, LOC688869, COX7A2, COX7B, COX8A, COX7C, COX4I1, COX7A2L, COX5A, COX5B, COX6C, COX6A2, COX6A1	12.0787	1.28489e-07	2.56977e-08	3.27618e-07																	12	2.12014	5.57088e-10	LOC688869, NDUFA4, COX7A2, COX7B, COX8A, COX7C, COX6A1, COX4I1, COX7A2L, COX5A, COX5B, COX6C	13.3699	3.21997e-07	1.07332e-07	8.1857e-07
GOTERM_BP_DIRECT	GO:0000398~mRNA splicing, via spliceosome	24	1.64384	6.66973e-07	BCAS2, LSM8, HNRNPA2B1, CWC15, LSM7, ZMAT2, SNRPB2, ZCRB1, YTHDC1, SF3B6, SF3B2, UBL5, NONO, DDX46, PRPF8, RSRC1, SNRNP200, LSM5, ZRSR1, LSM3, PHF5A, SNRPC, SNRPF, SNRPG	3.2681	0.00253129	0.000422327	0.0012326									22	3.19303	1.22905e-11	BCAS2, LSM8, HNRNPA2B1, CWC15, ZMAT2, LSM7, SNRPB2, ZCRB1, YTHDC1, SF3B6, SF3B2, UBL5, NONO, DDX46, RSRC1, LSM5, ZRSR1, LSM3, PHF5A, SNRPC, SNRPF, SNRPG	6.56071	2.52324e-08	1.26162e-08	2.11958e-08																	19	3.35689	2.13701e-10	BCAS2, LSM8, LSM6, HNRNPA2B1, CWC15, ZMAT2, LSM7, ZCRB1, YTHDC1, SF3B6, SF3B2, UBL5, RBMX2, SYF2, PHF5A, SNRPC, SNRPF, PRPF40B, SNRPG	6.90984	4.1928e-07	1.3976e-07	3.66597e-07
GOTERM_BP_DIRECT	GO:0015986~ATP synthesis coupled proton transport	13	0.890411	3.42708e-08	ATP5D, ATP5E, ATP5B, ATP6V0A1, ATP5L, ATP5G2, ATP5O, ATP5G1, ATP5A1, ATP5I, ATP5G3, ATP5H, ATP5J	7.22841	0.000130221	6.51125e-05	6.33347e-05									10	1.45138	4.92901e-08	ATP5D, ATP5E, ATP5L, ATP5O, ATP5G2, ATP5G1, ATP5I, ATP5G3, ATP5H, ATP5J	12.1771	0.000101187	2.52978e-05	8.50043e-05																	10	1.76678	8.84826e-09	ATP5D, ATP5E, ATP5L, ATP5O, ATP5G2, ATP5G1, ATP5I, ATP5G3, ATP5H, ATP5J	14.8501	1.73601e-05	4.34006e-06	1.51789e-05
GOTERM_CC_DIRECT	GO:0005751~mitochondrial respiratory chain complex IV	9	0.616438	6.60252e-06	NDUFA4, COX8A, COX7C, COX6A2, COX6A1, COX4I1, COX5A, COX5B, COX6C	7.59847	0.00498565	0.000151447	0.0100608									9	1.30624	2.23965e-08	NDUFA4, COX8A, COX7C, COX6A2, COX6A1, COX4I1, COX5A, COX5B, COX6C	15.9778	1.12654e-05	7.04089e-07	3.2279e-05																	8	1.41343	1.39948e-07	NDUFA4, COX8A, COX7C, COX6A1, COX4I1, COX5A, COX5B, COX6C	17.406	6.67532e-05	5.56294e-06	0.000200197
GOTERM_CC_DIRECT	GO:0005730~nucleolus	131	8.9726	4.76877e-18	RPL18, EIF6, S100A3, RPL19, SRP19, CBX5, NONO, ESF1, TOP1, DDX18, PSIP1, FBXO25, RPL11, HIRIP3, ACIN1, RPL12, RPS27A, OXR1, PIK3CB, ENC1, RRP9, ELL3, HNRNPR, ZFP593, RPAIN, KDM2A, ABT1, RPS14, PRKRIP1, USO1, CSTB, RPS13, EDF1, RPS10, RPS11, SEPT7, FBXO11, SMARCA4, CDV3, PUS1, CHCHD1, SNRPB2, TTC3, RPS25, EIF3A, PTK2, RPL7, RPL9, RPL8, NPM1, RPL3, EIF3L, RPL5, RPL10A, RPL4, ARL6IP4, RPS23, UTP23, …	2.20099	3.60996e-15	3.28178e-16	7.26693e-15	49	7.13246	7.10993e-05	GLTSCR2, BCLAF1, HMGB2, SURF6, LSM6, LYAR, ZMAT3, GPRC5B, ARFGEF1, IMP3, TCERG1, DDX24, URB1, PYCARD, CHD2, MLLT1, DDX21, TWISTNB, GNL2, FAM32A, WDR33, TFIP11, SSRP1, SRPK2, ESRRA, IK, EXOSC9, NIN, FOXJ2, ANP32B, SMG6, EXOSC4, FMR1, POLR1A, HN1, POLR1B, MBD1, ZCCHC17, RBBP8, CD3EAP, CAMK4, CCND2, JMJD6, MAP2, SMARCA5, NOP58, WDR3, RBM14, RNF20	1.82639	0.0372566	0.00473481	0.103283	91	13.2075	5.00033e-23	RPL18, S100A3, RPL19, HINT2, CTCF, SRP19, RPS19BP1, RPS3, CBX5, ESF1, NONO, TOP1, SBDS, DDX18, RPS3A, RTF1, PSIP1, HIRIP3, RPL11, RPL12, ACIN1, BRD4, RPS27A, OXR1, HIST1H1D, CDC5L, GTF2H5, RRP9, ELL3, NCL, HNRNPR, ZFP593, PFDN2, XPC, ABT1, TBCA, RPS14, PRKRIP1, CSTB, RPS13, EDF1, RPS10, RPS11, EEF1D, FBXO11, POLR2F, CDV3, MTDH, CHCHD1, SNRPB2, RPL36, TIMM13, RPS25, RPL7, REXO4, RPL31, RPL34, RPL9…	3.21498	2.51517e-20	5.03033e-21	7.20674e-20																	51	9.0106	2.35097e-07	RPL19, LSM6, HINT2, CTCF, SRP19, CBX5, IMP3, RPS3A, PSIP1, RPL11, TWISTNB, GNL2, RPS27A, OXR1, SRPK2, HIST1H1D, HN1, GTF2H5, ZCCHC17, NCL, ZFP593, CD3EAP, PFDN2, RPAIN, TBCA, RPS14, EDF1, RPS13, RPS11, RNF20, BCLAF1, CDV3, MTDH, CHCHD1, RPL36, TIMM13, RPS25, TCERG1, RPL31, RPL34, NSA2, ZC3H15, SUB1, FBL, RPS7, RPL23, RPL21, MAP2, CIRBP, PHF5A, RBM14	2.20823	0.000112135	8.62621e-06	0.000336306
GOTERM_MF_DIRECT	GO:0008137~NADH dehydrogenase (ubiquinone) activity	19	1.30137	3.52101e-11	NDUFA4, NDUFB4, NDUFA5, NDUFA2, NDUFB7, NDUFB8, NDUFB9, NDUFA7, NDUFC2, NDUFA10, LOC100911483, NDUFA12, NDUFS4, NDUFV1, NDUFV2, NDUFS8, NDUFS3, NDUFS2, NDUFS1	6.7083	4.05269e-08	8.10538e-09	5.66278e-08									14	2.03193	1.50306e-10	NDUFA4, NDUFA5, NDUFB4, NDUFA2, NDUFS4, NDUFB7, NDUFB8, NDUFB9, NDUFV2, NDUFA7, NDUFS8, NDUFC2, LOC100911483, NDUFA12	10.9539	8.65763e-08	2.16441e-08	2.2075e-07																	11	1.94346	6.26893e-08	NDUFA4, NDUFA5, NDUFB4, NDUFA2, NDUFS4, NDUFB7, NDUFB9, NDUFA7, NDUFC2, LOC100911483, NDUFA12	10.3206	3.62338e-05	9.05856e-06	9.21139e-05
GOTERM_CC_DIRECT	GO:0005689~U12-type spliceosomal complex	9	0.616438	0.000715405	LSM7, ZCRB1, SNRPD2, SF3B6, PHF5A, SNRPF, SNRPE, SNRPG, SF3B2	4.34198	0.418274	0.00962755	1.08464									9	1.30624	3.71939e-06	LSM7, ZCRB1, SNRPD2, SF3B6, PHF5A, SNRPF, SNRPE, SNRPG, SF3B2	9.13015	0.00186911	8.13383e-05	0.00536045																	9	1.59011	8.11817e-07	LSM7, ZCRB1, SNRPD2, SF3B6, PHF5A, SNRPF, SNRPE, SNRPG, SF3B2	11.1896	0.000387162	2.76594e-05	0.0011613
GOTERM_MF_DIRECT	GO:0046933~proton-transporting ATP synthase activity, rotational mechanism	10	0.684932	1.79744e-06	ATP5D, ATP5E, ATP5B, ATP5L, ATP5O, ATP5G2, ATP5G1, ATP5A1, ATP5G3, ATP5H	7.45367	0.00206672	0.000147765	0.00289076									8	1.1611	1.06787e-06	ATP5D, ATP5E, ATP5L, ATP5O, ATP5G2, ATP5G1, ATP5G3, ATP5H	13.2143	0.000614907	6.15077e-05	0.00156835																	8	1.41343	3.13291e-07	ATP5D, ATP5E, ATP5L, ATP5O, ATP5G2, ATP5G1, ATP5G3, ATP5H	15.8458	0.000181066	3.62158e-05	0.00046034
GOTERM_CC_DIRECT	GO:0071011~precatalytic spliceosome	9	0.616438	0.0018576	BCAS2, SNRPD2, LSM3, SF3B6, PHF5A, SNRNP27, SNRPE, SNRPG, SF3B2	3.79923	0.755248	0.0214212	2.79359									9	1.30624	1.11143e-05	BCAS2, SNRPD2, LSM3, SF3B6, PHF5A, SNRNP27, SNRPE, SNRPG, SF3B2	7.98888	0.00557495	0.000232912	0.0160174																	9	1.59011	2.48315e-06	BCAS2, RBMX2, SNRPD2, SF3B6, PHF5A, SNRNP27, SNRPE, SNRPG, SF3B2	9.79088	0.00118376	7.89611e-05	0.0035521
KEGG_PATHWAY	rno01100:Metabolic pathways	170	11.6438	2.28104e-09	CNDP2, NDUFAB1, PGAM1, COX5A, LOC100911483, COX5B, PNP, ITPKA, PDHB, GOT2, UQCR10, ACSS1, UQCR11, PIK3C3, PDHA1, PDXK, SUCLG1, COX6C, GLUL, NME2, PYCR2, NNT, NME3, CHPF, NME1, ABAT, MDH1, ME3, ALDOC, GLUD1, COX7B, COX7C, ATP6V1B2, HADHA, ATP6V0B, IDH2, GAD1, FH, GCDH, ATP5J2, COX8A, NTPCR, ACACA, FDPS, IDH3B, BPGM, TKT, NDUFV3, TST, PLCG1, NDUFV1, NDUFV2, ALDH2, COX6A2, COX6A1, QPRT, PC, UQCRC2, …	1.5199	5.7254e-07	7.15675e-08	2.96515e-06									79	11.4659	0.000461768	ATP5D, ATP5E, NDUFAB1, PMVK, UQCRFS1, COX5A, LOC100911483, UQCRQ, COX5B, NDUFS6, UQCR10, NDUFS5, NDUFS4, UQCR11, NDUFS8, ATP5L, ATP5O, ATP5I, COX17, ATP5H, ATP5J, NDUFB11, NDUFB10, SUCLG1, NDUFC2, COX4I1, CBR3, PIGP, NDUFA12, COX6C, ATP6V1F, NDUFA11, NME2, NME3, PTGDS, UQCRH, NME1, MDH1, UQCRB, NDUFB3, NDUFB4, POLR2G, NDUFB5, POLR2F, NDUFB6, POLR2E, NDUFB7, POLR2K, NDUFB8, NDUFB9, POLR2J, COX7B, …	1.44044	0.0729496	0.00754612	0.558494	72	12.5217	5.17011e-06	UQCRC2, UQCRC1, CKMT1B, CNDP2, ATP5B, OGDHL, SYNJ1, ACOT2, PGAM1, PIP5K1C, ITPKA, PNP, PDHB, GOT2, PIK3C3, PDHA1, SUCLA2, NDUFS3, NDUFS2, NDUFS1, PDXK, ACO2, PIK3C2A, PI4KA, POLR1C, PFKM, NDUFA10, ACADL, COQ6, ATP6V1A, PYCR2, GLUL, CHPF, ABAT, INPP4A, UROD, REV3L, BCAT1, ALDOC, GLUD1, HK1, ATP6V1B2, HADHA, POLR2B, MTM1, ACSL1, IDH2, FASN, HSD17B4, GAD1, FH, ENO1, BCKDHA, GCDH, FDPS, ACACA, BPGM, …	1.67268	0.00114711	0.000286901	0.00659062									71	12.5442	3.09729e-05	ATP5D, ATP5E, NDUFAB1, PMVK, UQCRFS1, COX5A, LOC100911483, UQCRQ, COX5B, NDUFS6, UQCR10, NDUFS5, NDUFS4, UQCR11, RPN1, ATP5L, ATP5O, ATP5I, TWISTNB, COX17, ATP5H, ATP5J, NDUFB11, SUCLG1, NDUFC2, COX4I1, NDUFA12, NDUFA11, ATP6V1F, COX6C, MGAT1, NME2, UQCRH, NME1, UQCRB, NDUFB3, NDUFB4, POLR2G, NDUFB6, POLR2E, NDUFB7, POLR2K, NDUFB9, POLR2J, COX7B, COX7C, ATP5G2, ATP6V1G1, ATP5G1, ATP5G3, NDUFB2, D…	1.60003	0.00522083	0.000581442	0.0377423
GOTERM_CC_DIRECT	GO:0005763~mitochondrial small ribosomal subunit	11	0.753425	1.34621e-06	MRPS36, MRPS26, MRPS16, MRPS28, MRPS15, MRPS18C, MRPS9, MRPS14, MRPS11, MRPS21, MRPS7	6.75419	0.00101856	3.39688e-05	0.00205142									10	1.45138	2.55963e-08	MRPS36, MRPS26, MRPS16, MRPS28, MRPS15, MRPS18C, MRPS14, MRPS11, MRPS21, MRPS7	12.9113	1.28749e-05	7.57349e-07	3.68907e-05																	7	1.23675	2.7241e-05	MRPS26, MRPS16, MRPS15, MRPS18C, MRPS14, MRPS21, MRPS7	11.0766	0.0129101	0.000811804	0.0389613
GOTERM_CC_DIRECT	GO:0005686~U2 snRNP																	7	1.01597	0.000111516	SNRPB2, SNRPD2, SF3B6, PHF5A, SNRPE, SNRPG, SF3B2	8.64497	0.0545515	0.00200142	0.160603																	7	1.23675	3.59667e-05	RBMX2, SNRPD2, SF3B6, PHF5A, SNRPE, SNRPG, SF3B2	10.595	0.0170101	0.00100869	0.0514383
GOTERM_MF_DIRECT	GO:0008121~ubiquinol-cytochrome-c reductase activity	5	0.342466	0.00167968	UQCR11, UQCRH, UQCRFS1, UQCRQ, UQCRB	8.38537	0.855567	0.0440011	2.66744									5	0.725689	7.90109e-05	UQCR11, UQCRH, UQCRFS1, UQCRQ, UQCRB	18.5826	0.0444919	0.00302954	0.115978																	5	0.883392	3.87777e-05	UQCR11, UQCRH, UQCRFS1, UQCRQ, UQCRB	22.2832	0.0221646	0.00319687	0.0569638
KEGG_PATHWAY	rno03060:Protein export	11	0.753425	3.19863e-05	SRP14, OXA1L, SEC61B, SEC11C, SEC11A, SPCS1, HSPA5, SRP19, SEC62, SEC61G, SRP9	4.89084	0.00799655	0.000617401	0.0415714									9	1.30624	7.52258e-06	SRP14, SEC61B, SEC11C, SPCS1, HSPA5, SRP19, SEC62, SEC61G, SRP9	8.16084	0.00123295	0.000137069	0.00912135																	7	1.23675	0.000195161	SEC61B, SEC11A, SPCS1, SRP19, SEC62, SEC61G, SRP9	7.845	0.0324474	0.00329311	0.237597
GOTERM_CC_DIRECT	GO:0015935~small ribosomal subunit	15	1.0274	1.10181e-08	RPS25, RPSA, RPS18, RPS28, RPS29, RPS16, MRPS12, NPM1, RPS15, FAU, RPS4X, RPS5, RPS27A, RPS23, RPS24	6.53632	8.34064e-06	3.62638e-07	1.679e-05									14	2.03193	1.27943e-11	RPS25, RPS18, RPS28, RPS29, RPS16, MRPS12, NPM1, RPS15, FAU, RPS4X, RPS5, RPS27A, RPS23, RPS24	12.828	6.43554e-09	5.36295e-10	1.84398e-08																	7	1.23675	0.000215895	RPS25, RPS18, IMP3, RPS28, FAU, RPS27A, RPS24	7.86078	0.0978668	0.00489243	0.308396
GOTERM_CC_DIRECT	GO:0005750~mitochondrial respiratory chain complex III	8	0.547945	6.78932e-06	UQCRC2, UQCR10, UQCRC1, UQCRH, CYC1, UQCRFS1, UQCRQ, UQCRB	9.00559	0.00512635	0.000151151	0.0103455									5	0.725689	0.000597583	UQCR10, UQCRH, UQCRFS1, UQCRQ, UQCRB	11.8354	0.259681	0.00997242	0.857826																	5	0.883392	0.000275349	UQCR10, UQCRH, UQCRFS1, UQCRQ, UQCRB	14.505	0.123098	0.005695	0.393167
GOTERM_CC_DIRECT	GO:0005685~U1 snRNP																																									6	1.06007	0.00026436	SNRPD2, SNRPC, PRPF40B, SNRPF, SNRPE, SNRPG	9.94629	0.118488	0.00571616	0.377504
GOTERM_CC_DIRECT	GO:0031966~mitochondrial membrane	19	1.30137	0.000240989	NDUFA2, OXA1L, NDUFB6, ACADS, NDUFA6, ATP5B, GABBR1, COX4I1, ACADL, UQCRFS1, LOC100911483, NME2, ETFDH, MAPK8IP1, NRGN, NDUFS3, LRRK2, TMEM14C, DNM1	2.64597	0.166774	0.0038744	0.366604																																	11	1.94346	0.000464608	NDUFA2, NME2, NDUFB6, NDUFA6, BAX, COX4I1, NRGN, UQCRFS1, LOC100911483, TMEM14C, NAT8L	3.94776	0.19882	0.00882758	0.662573
GOTERM_CC_DIRECT	GO:0034709~methylosome	6	0.410959	0.00250047	PRMT1, ERH, SNRPD2, SNRPF, SNRPE, SNRPG	5.78931	0.849715	0.0274861	3.74327									5	0.725689	0.00114249	ERH, SNRPD2, SNRPF, SNRPE, SNRPG	10.1446	0.437295	0.0178083	1.63406																	5	0.883392	0.000531948	ERH, SNRPD2, SNRPF, SNRPE, SNRPG	12.4329	0.224158	0.0097143	0.758266
GOTERM_BP_DIRECT	GO:0006123~mitochondrial electron transport, cytochrome c to oxygen																	7	1.01597	5.96005e-06	COX8A, COX7C, COX6A2, COX6A1, COX4I1, COX5A, COX5B	13.6383	0.0121615	0.00135863	0.010278																	6	1.06007	4.01412e-05	COX8A, COX7C, COX6A1, COX4I1, COX5A, COX5B	14.2561	0.0757369	0.0130406	0.0688386
GOTERM_BP_DIRECT	GO:0046034~ATP metabolic process	17	1.16438	1.02646e-07	ATP5D, ATP5E, ATP5J2, ATP5B, ATP5G1, ATP6V1B2, ATP1A2, AMPD2, ATP6V1A, ATP5L, ATP5O, ATP5A1, ATP5I, ATP5H, HSPA8, NDUFS1, ATP5J	4.93176	0.00038998	0.00013001	0.000189697									11	1.59652	2.69519e-06	ATP5D, ATP5E, ATP5J2, ATP5L, ATP5O, ATP5G1, ATP1A2, ATP5I, ATP5H, HSPA8, ATP5J	6.98859	0.00551796	0.000691416	0.00464795																	9	1.59011	3.65248e-05	ATP5D, ATP5E, ATP5J2, ATP5L, ATP5O, ATP5G1, ATP5I, ATP5H, ATP5J	6.97309	0.0691555	0.0142304	0.0626387
GOTERM_MF_DIRECT	GO:0003723~RNA binding	68	4.65753	1.28633e-07	RPL18, SCAF1, TARS2, LSM8, RPL13, XPO5, CWC15, LSM7, SYNJ1, ZMAT2, TRMT1, CNP, RPS2, RPS3, SBDS, PCP4, TARDBP, PCBP2, LSM5, LSM3, PUM2, HNRNPA2B1, EEF2, CLUH, NCL, RPS18, PSMA6, RPS16, ABT1, RPS14, LARP7, RPS15, SNRPF, MCTS1, LRPPRC, MATR3, SNRPG, HDLBP, ARHGEF28, SKIV2L, RBMXRTL, ZCRB1, RPL37, RPL38, RPL39, HNRNPL, EIF3D, DDX46, RPS28, RPL34, RPL9, SAFB, NPM1, HNRNPD, RGD1304704, RPL10A, HSPA8, …	1.962	0.000148046	1.64506e-05	0.000206878									51	7.40203	3.14435e-13	RPL18, LSM8, RPL13, CWC15, ZMAT2, LSM7, RPS3, SBDS, PCP4, TARDBP, PCBP2, LSM5, LSM3, HNRNPA2B1, NCL, RPS18, RPS16, ABT1, LARP7, RPS14, RPS15, SNRPF, MCTS1, SNRPG, HDLBP, RBMXRTL, ZCRB1, RPL37, RPL38, RPL39, HNRNPL, RPS28, DDX46, RPL34, RPL9, SAFB, NPM1, HNRNPD, RGD1304704, RPL10A, HSPA8, ALYREF, YTHDC1, SSB, RPS5, HNRNPA1, FBL, PHAX, MRPL23, ZRANB2, CIRBP	3.26094	1.81103e-10	6.03677e-11	4.61775e-10																	28	4.947	0.000298477	LOC683897, LSM8, LSM6, LSM7, ZMAT2, CWC15, ZCRB1, RPL38, RPS28, PCP4, RPL34, PCBP2, HNRNPD, RGD1304704, PRPF40B, HNRNPA2B1, YTHDC1, SSB, ZFR, NCL, FBL, RPS18, RPS14, RBMX2, CIRBP, SNRPF, MCTS1, SNRPG	2.14685	0.15848	0.0213372	0.437679
GOTERM_CC_DIRECT	GO:0005681~spliceosomal complex	18	1.23288	4.45293e-05	BCAS2, HNRNPA2B1, CWC15, SNRPB2, HNRNPA1, WBP4, CTNNBL1, SF3B2, SMNDC1, HNRNPA3, PRPF8, SNRNP200, SRRM1, RHEB, ZRSR1, SNRPF, RBM25, HSPA8	3.11732	0.0331476	0.000863972	0.0678349									14	2.03193	2.9901e-06	BCAS2, SNRPB2, CWC15, HNRNPA2B1, HNRNPA1, WBP4, SF3B2, SMNDC1, HNRNPA3, SRRM1, ZRSR1, SNRPF, RBM25, HSPA8	5.09832	0.00150289	6.83623e-05	0.0043094																	9	1.59011	0.00174776	BCAS2, HNRNPA3, LSM6, HNRNPA2B1, CWC15, RHEB, SNRPF, WBP4, SF3B2	4.01677	0.565869	0.0304314	2.47131
GOTERM_CC_DIRECT	GO:0005746~mitochondrial respiratory chain																																									4	0.706714	0.00241947	COX7A2, COX7B, COX7A2L, LOC100911483	13.9248	0.685095	0.0404274	3.4059
GOTERM_CC_DIRECT	GO:0005732~small nucleolar ribonucleoprotein complex																																									4	0.706714	0.00325634	LSM6, LSM7, SNRPF, SNRPG	12.6589	0.788981	0.0489487	4.55863
GOTERM_CC_DIRECT	GO:0030529~intracellular ribonucleoprotein complex	31	2.12329	2.16981e-09	MYO5A, MRPL41, SLIRP, RPS2, RPS3, HNRNPL, RPL7, RPS3A, NPM1, HNRNPD, RPL5, RPL4, GTF3C1, HSPA8, ACTN4, HNRNPA2B1, RPL27, EEF2, SSB, DDX5, RPS4X, RPS5, HNRNPR, HNRNPA1, NCL, RPS8, RPS7, RPL13A, LARP7, LRRK2, LRPPRC	3.48967	1.64254e-06	8.21272e-08	3.30648e-06									23	3.33817	1.79669e-10	MRPL41, HNRNPA2B1, RPL27, SSB, SLIRP, RPS4X, RPS5, HNRNPR, HNRNPA1, NCL, RPS8, RPS3, RPS7, HNRNPL, RPL7, RPL13A, RPS3A, LARP7, NPM1, HNRNPD, RPL5, RPL4, HSPA8	5.44427	9.03736e-08	6.95181e-09	2.58949e-07
GOTERM_MF_DIRECT	GO:0051082~unfolded protein binding	22	1.50685	9.55059e-08	CCT3, ST13, PFDN2, PFDN1, CCT5, CCT4, PFDN6, PFDN5, CCT8, NPM1, TOMM20, DNAJA1, AAMP, MKKS, SCG5, HSPE1, PDRG1, HSPA5, CDC37L1, HSPA8, PET100, HSPA9	3.88375	0.000109921	1.37408e-05	0.0001536									16	2.32221	2.75967e-08	ST13, PFDN2, PFDN1, PFDN6, PFDN5, NPM1, DNAJA1, TOMM20, MKKS, SCG5, HSPE1, PDRG1, HSPA5, CDC37L1, HSPA8, PET100	6.2594	1.58956e-05	2.27081e-06	4.05304e-05
GOTERM_MF_DIRECT	GO:0019843~rRNA binding	14	0.958904	2.61736e-05	MRPS15, RPL37, MRPS7, RPS4X, RPS5, MRPL20, MRPL11, SBDS, RPS18, RPL9, NPM1, MRPL16, RPL11, RPS11	3.99643	0.0296769	0.00158433	0.0420862									13	1.88679	3.25724e-08	MRPL11, SBDS, RPS18, MRPS15, RPL9, NPM1, RPL37, RPL11, RPS11, MRPS7, RPS4X, RPS5, MRPL20	8.22378	1.87615e-05	2.34521e-06	4.78381e-05
GOTERM_MF_DIRECT	GO:0003729~mRNA binding	28	1.91781	1.344e-05	XPO5, RBMXRTL, RPL35, RPS2, RPS3, HNRNPA3, RPS26, EIF3A, MRPL13, RPL7, RBM8A, RPS3A, RPL6, HNRNPD, RPL5, RBM25, CLUH, MRPS7, DENR, RPS5, HNRNPA1, PARK7, UPF3B, RPL13A, RPS13, SNRPC, THOC5, THOC2	2.52124	0.0153505	0.000909556	0.021613									22	3.19303	2.69563e-08	RBMXRTL, RPL35, MRPS7, DENR, RPS5, HNRNPA1, PARK7, RPS3, HNRNPA3, RPS26, MRPL13, UPF3B, RPL7, RPL13A, RPS3A, RBM8A, RPL6, HNRNPD, RPS13, RPL5, SNRPC, RBM25	4.38998	1.55267e-05	2.5878e-06	3.959e-05
GOTERM_MF_DIRECT	GO:0000166~nucleotide binding	45	3.08219	6.65989e-05	HINT1, SYNJ1, SNRPB2, RBMXRTL, ZCRB1, SF3B6, SLIRP, HNRNPA3, HNRNPL, NONO, EIF3G, RBM8A, SAFB, TARDBP, HNRNPD, PPIL4, GUCY1A3, ZRSR1, ACIN1, RPS24, MCM3AP, ALYREF, HNRNPA2B1, SSB, RPL23A, VDAC2, VDAC3, NCL, HNRNPA1, HNRNPR, VDAC1, MRPL23, ITPA, TRNAU1AP, SRSF4, UPF3B, ABT1, LARP7, SFPQ, CPSF7, PPRC1, CIRBP, GUCY1B3, MATR3, REV3L	1.87499	0.0737933	0.00347839	0.107056									33	4.78955	4.42997e-08	HINT1, SNRPB2, RBMXRTL, ZCRB1, SF3B6, SLIRP, HNRNPA3, HNRNPL, NONO, EIF3G, RBM8A, SAFB, TARDBP, HNRNPD, ZRSR1, ACIN1, RPS24, ALYREF, HNRNPA2B1, RPL23A, SSB, HNRNPA1, NCL, HNRNPR, MRPL23, ITPA, TRNAU1AP, SRSF4, UPF3B, ABT1, LARP7, SFPQ, CIRBP	3.04708	2.55163e-05	2.83518e-06	6.50618e-05
GOTERM_MF_DIRECT	GO:0008097~5S rRNA binding	8	0.547945	3.93869e-07	TST, HMGB1, RPL7, RPL3, MRPL18, EEF2, RPL5, RPL4	11.9259	0.000453241	4.53334e-05	0.00063345									6	0.870827	4.72088e-06	HMGB1, RPL7, RPL3, MRPL18, RPL5, RPL4	19.8214	0.00271554	0.000226577	0.0069332
GOTERM_CC_DIRECT	GO:0016607~nuclear speck	23	1.57534	0.000819119	AKAP8L, SAP18, YTHDC1, BASP1, CDC5L, TOPORS, WBP4, SMNDC1, SARNP, NONO, PPIG, DDX46, RGD1559904, RBM8A, TARDBP, RSRC1, NPM1, PRKACA, PHF5A, ACIN1, ARL6IP4, APBB1, RBM25	2.17268	0.462232	0.0108239	1.24097									18	2.61248	1.14866e-05	SAP18, YTHDC1, CDC5L, BASP1, WBP4, SMNDC1, SARNP, NONO, PPIG, DDX46, RBM8A, TARDBP, RSRC1, NPM1, PHF5A, ACIN1, ARL6IP4, RBM25	3.57544	0.00576114	0.000231085	0.0165538
GOTERM_BP_DIRECT	GO:0006364~rRNA processing																	14	2.03193	6.01098e-07	RPL14, RPL26, GTF2H5, RRP9, RPS7, SBDS, RPS28, RPL7, RPS16, RPS17, RPS15, RPL5, RPL11, RPS24	5.845	0.00123329	0.000246781	0.00103663
GOTERM_BP_DIRECT	GO:0000027~ribosomal large subunit assembly																	10	1.45138	8.27745e-07	MRPL11, RPL6, RPL3, RPL10, RPL24, RPL5, RPL23A, RPL11, RPL12, MRPL20	9.13281	0.00169792	0.000283187	0.0014275
GOTERM_MF_DIRECT	GO:0051537~2 iron, 2 sulfur cluster binding	9	0.616438	0.000164743	ISCU, CISD1, ISCA2, CISD3, NDUFV2, FDX1L, UQCRFS1, NDUFS1, GLRX2	5.24997	0.172739	0.00755671	0.264624									8	1.1611	7.10603e-06	ISCU, CISD1, ISCA2, CISD3, NDUFV2, FDX1L, UQCRFS1, GLRX2	10.3416	0.00408472	0.000314803	0.0104359
GOTERM_CC_DIRECT	GO:0005761~mitochondrial ribosome	7	0.479452	0.00138524	MRPL23, MRPL13, MRPL51, MRPS15, CHCHD1, MRPS12, MRPL20	5.25326	0.649835	0.0165184	2.09021									7	1.01597	2.38324e-05	MRPL23, MRPL13, MRPL51, MRPS15, CHCHD1, MRPS12, MRPL20	11.0464	0.0119163	0.000460965	0.0343431
GOTERM_BP_DIRECT	GO:0097421~liver regeneration	15	1.0274	3.83287e-05	RPL18, RPL19, RPL13, EZH1, NFKBIA, NCL, RPL30, PRMT1, RPL7, RPS16, RPL32, RPS15, NPM1, RPL10, RPS24	3.63948	0.135541	0.0131538	0.0708102									12	1.74165	2.05743e-06	RPL18, RPL30, RPL19, RPL32, RPS16, RPL7, RPL13, NPM1, RPS15, RPL10, NCL, RPS24	6.37636	0.004215	0.000603233	0.00354813
GOTERM_CC_DIRECT	GO:0016272~prefoldin complex	5	0.342466	0.000870115	PFDN2, PFDN1, PFDN6, PFDN5, PDRG1	9.64885	0.482613	0.0112971	1.31775									5	0.725689	4.86477e-05	PFDN2, PFDN1, PFDN6, PFDN5, PDRG1	20.2892	0.0241734	0.0009059	0.0700908
GOTERM_MF_DIRECT	GO:0070181~small ribosomal subunit rRNA binding	6	0.410959	0.00115508	UTP23, RPS14, MRPS11, CIRBP, RPS13, RPS3	6.7083	0.735593	0.0353145	1.8416									6	0.870827	2.72819e-05	UTP23, RPS14, MRPS11, CIRBP, RPS13, RPS3	14.8661	0.0155917	0.00112184	0.0400606
GOTERM_BP_DIRECT	GO:0006457~protein folding	24	1.64384	7.6099e-06	ERP29, FKBP3, TXN1, CCT3, ST13, PFDN2, CCT5, PFDN1, PPIG, CCT4, PFDN6, PPIA, PFDN5, CCT8, TBCC, HSPA4L, DNAJA1, PPIL4, MKKS, HSPE1, PDRG1, CDC37L1, HSPA8, HSPA9	2.85959	0.0285036	0.00360819	0.0140627									16	2.32221	6.20622e-06	ERP29, FKBP3, TXN1, ST13, PFDN2, PFDN1, PPIG, PPIA, PFDN6, PFDN5, DNAJA1, MKKS, HSPE1, PDRG1, CDC37L1, HSPA8	4.175	0.0126606	0.00127333	0.0107025
GOTERM_BP_DIRECT	GO:0000028~ribosomal small subunit assembly	12	0.821918	0.000244726	RPS25, RPSA, RPS27, RPS28, RPS17, RPS14, MRPS11, RPS15, RPS10, MRPS7, RPS2, RPS5	3.72412	0.605475	0.0413948	0.451303									10	1.45138	1.18965e-05	RPS25, RPS27, RPS28, RPS17, RPS14, MRPS11, RPS15, RPS10, MRPS7, RPS5	6.79651	0.0241278	0.00174302	0.0205143
GOTERM_BP_DIRECT	GO:0042273~ribosomal large subunit biogenesis	11	0.753425	0.000100442	EIF6, RPL35A, RPL14, RPL7, NOP16, MALSU1, NPM1, AAMP, RPL26, RPL5, RPL11	4.44825	0.3173	0.0251256	0.185461									9	1.30624	1.15347e-05	RPL35A, RPL14, RPL7, NOP16, MALSU1, NPM1, RPL26, RPL5, RPL11	7.97045	0.0234026	0.00181994	0.0198905
GOTERM_BP_DIRECT	GO:0042274~ribosomal small subunit biogenesis																	7	1.01597	1.38999e-05	RPS28, RPS16, RPS17, NPM1, RPS15, RPS7, RPS24	12.0338	0.0281334	0.00190064	0.0239687
GOTERM_BP_DIRECT	GO:0002181~cytoplasmic translation																	12	1.74165	1.12948e-05	RPL35A, RPL7, RPL6, RPL31, RPL9, RPL15, RPLP1, RPL8, RPL26, RPL36, RPL22L1, RPL29	5.39538	0.0229216	0.0019305	0.0194769
GOTERM_BP_DIRECT	GO:0006979~response to oxidative stress	25	1.71233	0.000211038	NDUFB4, ATOX1, PINK1, PRDX5, PRDX2, RPS3, ALDH1A1, APOE, GPX4, NDUFS8, PSIP1, ETFDH, NDUFS2, OXR1, MT3, HMOX2-PS1, NDUFA6, CST3, SOD1, PARK7, DDIT3, NDUFA12, XPA, PEBP1, LRRK2	2.28506	0.551581	0.0374717	0.389292									18	2.61248	1.04023e-05	NDUFB4, ATOX1, NDUFA6, CST3, PRDX5, SOD1, NDUFA12, DDIT3, PARK7, RPS3, XPA, APOE, GPX4, NDUFS8, PSIP1, PEBP1, OXR1, MT3	3.60308	0.0211296	0.00193958	0.017938
GOTERM_MF_DIRECT	GO:0070180~large ribosomal subunit rRNA binding																	6	0.870827	0.000134554	RPL17, RPL19, RPL23, RPLP1, RPL23A, RPL12	11.1496	0.0745809	0.00483257	0.197434
GOTERM_BP_DIRECT	GO:0000462~maturation of SSU-rRNA from tricistronic rRNA transcript (SSU-rRNA, 5.8S rRNA, LSU-rRNA)	12	0.821918	0.000121108	UTP23, TBL3, MRPS9, RPS16, LOC297756, RPS14, MRPS11, NGDN, CCDC59, WDR46, RPS8, RPS24	4.00342	0.368867	0.0283551	0.223579									9	1.30624	5.17466e-05	UTP23, RPS16, LOC297756, RPS14, MRPS11, NGDN, CCDC59, RPS8, RPS24	6.57562	0.10079	0.00661792	0.0892033
GOTERM_MF_DIRECT	GO:0051087~chaperone binding																	11	1.59652	0.000243746	ST13, DLST, PFDN6, SDF2L1, ERP29, DNAJA1, TIMM10, HSPE1, ATP1A2, SOD1, CDC37L1	4.24745	0.131002	0.00822569	0.357387
GOTERM_CC_DIRECT	GO:0005665~DNA-directed RNA polymerase II, core complex	7	0.479452	0.00254476	POLR2G, POLR2F, POLR2E, POLR2K, POLR2J, BRD4, POLR2B	4.72794	0.854683	0.0275671	3.80839									6	0.870827	0.000527972	POLR2G, POLR2F, POLR2E, POLR2K, POLR2J, BRD4	8.52147	0.233285	0.00911817	0.758252
GOTERM_MF_DIRECT	GO:0015078~hydrogen ion transmembrane transporter activity																	7	1.01597	0.000342514	ATP5L, ATP5G2, ATP5I, ATP5G3, ATP5H, ATP6V0B, ATP5J	7.17672	0.179074	0.0109025	0.501863
GOTERM_BP_DIRECT	GO:0006120~mitochondrial electron transport, NADH to ubiquinone																	6	0.870827	0.000103322	NDUFS6, NDUFB8, NDUFB9, NDUFV2, NDUFA7, NDUFC2	11.69	0.191142	0.0124008	0.178037
GOTERM_CC_DIRECT	GO:0031672~A band																	6	0.870827	0.00105009	RPL17, RPL7, RPL6, RPL15, RPL4, S100A1	7.40998	0.410495	0.016903	1.50283
GOTERM_CC_DIRECT	GO:0022626~cytosolic ribosome																	5	0.725689	0.00114249	RPL27A, RPL24, RPL5, RPL11, RPL29	10.1446	0.437295	0.0178083	1.63406
GOTERM_MF_DIRECT	GO:0003697~single-stranded DNA binding																	11	1.59652	0.000659204	POLR2G, HMGB1, XPC, SUB1, NUCKS1, NME1, RTF1, ALYREF, NCL, HNRNPA1, PARK7	3.75924	0.31602	0.0197924	0.963799
GOTERM_CC_DIRECT	GO:1904115~axon cytoplasm	12	0.821918	3.72013e-05	BLOC1S4, KIF3A, UCHL1, BLOC1S1, AP3D1, RANBP1, SNAPIN, SOD1, NEFL, DYNLRB1, WDR81, HAP1	4.5028	0.0277691	0.000740828	0.0566746									7	1.01597	0.00145942	BLOC1S4, UCHL1, BLOC1S1, RANBP1, SNAPIN, SOD1, DYNLRB1	5.52318	0.520313	0.0220153	2.08292
GOTERM_CC_DIRECT	GO:0015934~large ribosomal subunit																	5	0.725689	0.00151491	RPL17, NPM1, RPL26, RPL10A, RPL4	9.4683	0.533536	0.022179	2.16132
GOTERM_BP_DIRECT	GO:0032543~mitochondrial translation																	7	1.01597	0.0002484	MRPL23, MRPS34, MRPS16, MRPS15, MRPS18C, CHCHD1, MRPS7	7.57685	0.399521	0.0279372	0.42752
GOTERM_BP_DIRECT	GO:0048025~negative regulation of mRNA splicing, via spliceosome																	7	1.01597	0.0002484	HNRNPL, SRSF4, HNRNPA2B1, RBMXRTL, NPM1, SAP18, ACIN1	7.57685	0.399521	0.0279372	0.42752
GOTERM_CC_DIRECT	GO:0005688~U6 snRNP																	4	0.580552	0.00212093	LSM7, LSM5, LSM4, LSM3	14.2025	0.656292	0.0300524	3.0137
GOTERM_CC_DIRECT	GO:0005720~nuclear heterochromatin																	6	0.870827	0.00224338	HIST1H1D, H2AFZ, PSIP1, CBX3, MPHOSPH8, CBX5	6.3122	0.676866	0.0300707	3.18508
GOTERM_CC_DIRECT	GO:0046540~U4/U6 x U5 tri-snRNP complex																	6	0.870827	0.00224338	LSM8, ZMAT2, LSM5, SNRPD2, LSM3, SNRPE	6.3122	0.676866	0.0300707	3.18508
GOTERM_CC_DIRECT	GO:0005762~mitochondrial large ribosomal subunit	11	0.753425	0.000414785	MRPL11, MRPL23, MRPL13, MRPL51, MRPL12, MRPL41, MPV17L2, MRPL27, MRPL16, MRPL19, MRPL37	3.81006	0.269523	0.00613907	0.630212									7	1.01597	0.00223624	MRPL11, MRPL23, MRPL13, MRPL51, MRPL12, MRPL41, MRPL27	5.09832	0.6757	0.030796	3.17509
GOTERM_BP_DIRECT	GO:0000387~spliceosomal snRNP assembly																	7	1.01597	0.000307095	LSM4, SNRPD2, SNRPC, SNRPF, SNRPE, GEMIN7, SNRPG	7.30625	0.467708	0.0310363	0.528289
GOTERM_BP_DIRECT	GO:0008380~RNA splicing																	12	1.74165	0.000295276	HNRNPA3, PRPF4B, RBM8A, RSRC1, TARDBP, ZRANB2, CDC5L, SNRPF, ARL6IP4, HNRNPA1, HSPA8, SMNDC1	3.81196	0.45463	0.0314063	0.508005
GOTERM_MF_DIRECT	GO:0097100~supercoiled DNA binding																	4	0.580552	0.00119082	HMGB1, HMG1L1, PSIP1, RPS3	16.9898	0.496576	0.033734	1.73475
GOTERM_CC_DIRECT	GO:0034719~SMN-Sm protein complex																	5	0.725689	0.003123	SNRPD2, SNRPF, SNRPE, GEMIN7, SNRPG	7.89025	0.792646	0.0405579	4.40797
GOTERM_MF_DIRECT	GO:1990932~5.8S rRNA binding																	4	0.580552	0.00185791	RPL19, RPL6, RPL8, RPS13	14.8661	0.657386	0.0497282	2.69424
GOTERM_MF_DIRECT	GO:0005525~GTP binding	47	3.21918	0.000749044	TUFM, SEPT4, RAB3A, GPN3, RAB3B, RAB3C, TUBB2B, ATL1, TUBB2A, RAB5C, GLUD1, GNA12, EIF5B, MTIF2, URGCP, IFT22, TUBB5, GUCY1A3, RAB6B, TUBG1, AGAP1, TUBA1B, GNL1, AGAP2, TUBB3, TUBB4A, TUBB4B, RAB2B, OPA1, RABL6, SUCLG1, EEF1A2, EEF2, PCK2, ARL3, RNF112, MFN2, NOLC1, NME1, ARF3, RHOT2, RHEB, TUBA4A, GUCY1B3, LRRK2, SEPT7, DNM1	1.65942	0.577883	0.0265923	1.19789																	36	6.26087	8.91019e-09	TUFM, SEPT4, RAB3A, RAB3B, RAB3C, TUBB2B, ATL1, RAB5C, GLUD1, GNA12, MTIF2, URGCP, TUBB5, GUCY1A3, RAB6B, AGAP1, TUBA1B, GNL1, AGAP2, TUBB3, TUBB4A, TUBB4B, RAB2B, OPA1, RABL6, EEF2, PCK2, RNF112, MFN2, ARF3, RHOT2, TUBA4A, GUCY1B3, LRRK2, SEPT7, DNM1	3.05692	6.50441e-06	9.29205e-07	1.35126e-05
GOTERM_MF_DIRECT	GO:0003924~GTPase activity	31	2.12329	0.000151635	TUFM, RAB3A, RAB3B, GPN3, RAB3C, TUBB2B, ATL1, TUBB2A, RAB5C, GNA12, EIF5B, MTIF2, TUBB5, TUBG1, TUBA1B, GNL1, TUBB3, TUBB4A, TUBB4B, OPA1, EEF1A2, EEF2, ARL3, MFN2, RNF112, TBCC, TUBA4A, RHEB, RHOT2, LRRK2, DNM1	2.10058	0.160161	0.00724631	0.243592																	23	4	2.23463e-07	TUFM, RAB3A, RAB3B, OPA1, RAB3C, TUBB2B, ATL1, RAB5C, GNA12, EEF2, MTIF2, MFN2, RNF112, TUBB5, TUBA4A, RHOT2, LRRK2, TUBA1B, GNL1, TUBB4A, DNM1, TUBB3, TUBB4B	3.74824	0.000163115	1.81252e-05	0.000338888
KEGG_PATHWAY	rno01130:Biosynthesis of antibiotics~	36	2.46575	0.000246027	BCAT1, ALDOC, OGDHL, PGAM1, HK1, PDHB, HADHA, GOT2, ACSS1, IDH2, PDHA1, SUCLA2, FH, ENO1, BCKDHA, GCDH, DLST, ACO2, SUCLG1, SDSL, FDPS, IDH3B, TKT, BPGM, ACLY, PFKM, AMPD2, PCK2, GPI, PYCR2, NME2, NME3, NME1, SDHD, ALDH2, MDH1	1.9003	0.0598919	0.00410889	0.319342																	25	4.34783	2.16676e-07	BCAT1, ALDOC, OGDHL, PGAM1, HK1, HADHA, PDHB, GOT2, IDH2, PDHA1, SUCLA2, ENO1, FH, BCKDHA, GCDH, ACO2, FDPS, TKT, BPGM, ACLY, PFKM, PCK2, AMPD2, GPI, PYCR2	3.42907	4.81008e-05	4.81008e-05	0.000276216
GOTERM_CC_DIRECT	GO:0005741~mitochondrial outer membrane	22	1.50685	0.000180307	OPA1, NOS1, SAMM50, SLC25A4, WASF1, PINK1, HK1, NLRX1, CNP, VDAC2, VDAC3, VDAC1, MFN2, CISD1, ACSL1, NME1, PHB2, TOMM20, PEBP1, MTOR, LRRK2, MT3	2.47654	0.127598	0.00309757	0.27441																	16	2.78261	2.13175e-06	OPA1, SAMM50, SLC25A4, WASF1, PINK1, NLRX1, HK1, CNP, VDAC2, VDAC3, VDAC1, MFN2, ACSL1, PHB2, MTOR, LRRK2	4.57284	0.00111003	4.82877e-05	0.00308752
GOTERM_CC_DIRECT	GO:0042995~cell projection	19	1.30137	0.00021059	SEPT4, NGEF, AGFG1, VIM, CLSTN1, CSPG4, CST3, ACTN1, CNP, DDN, MDK, COQ6, MBP, GLUL, PLCG1, MAP1S, TUBB4A, APC, FEZ1	2.67354	0.147374	0.00345995	0.32043																	14	2.43478	4.12859e-06	SEPT4, NGEF, VIM, ACTN1, CNP, DDN, MBP, COQ6, GLUL, PLCG1, MAP1S, TUBB4A, APC, FEZ1	5.00154	0.00214869	8.96209e-05	0.00597956
GOTERM_CC_DIRECT	GO:0005794~Golgi apparatus	86	5.89041	0.00125617	SYT1, DENND5A, SNCB, ATL1, AP2S1, IGFBP6, B2M, KIFC3, RABAC1, ARHGAP21, DPY30, GBF1, SCRG1, IFT20, APOE, KIFAP3, DYNC2H1, PSENEN, GKAP1, RAB6B, PRKACA, CLINT1, DPP7, ARHGEF2, STMN3, STMN2, MTA1, MINK1, CORO7, PRKCE, BICD2, GAK, COQ6, ARL3, XPA, CPE, PTGDS, TRAPPC9, LARP7, USO1, PEBP1, PDE4DIP, LRRK2, MYO18A, RNPEP, GRB14, TRAPPC3, MYO5A, AFTPH, ING2, APC2, ENPP2, TRRAP, SEC14L1, PSMB6, MACF1, GOR…	1.40305	0.613846	0.0154777	1.8972																	49	8.52174	4.50611e-06	MYO5A, DENND5A, APC2, ATL1, TRRAP, SEC14L1, KIFC3, ARHGAP21, GBF1, MACF1, GORASP1, PSMB3, KIFAP3, FASN, DYNC2H1, PKD1, PRKACA, RAB6B, NDRG2, DPP7, USP32, GDI1, ARHGEF2, HTT, MTA1, MINK1, CORO7, CAPN2, BICD2, GAK, COQ6, HDAC5, HDAC3, TRAPPC9, PDE2A, NEDD4, TENM2, ARF3, TSC2, USO1, DYM, ATP6V0A1, PDE4DIP, LRRK2, MYO18A, RNPEP, DNM1, GRB14, FEZ1	2.02961	0.00234493	9.39031e-05	0.00652631
GOTERM_BP_DIRECT	GO:0007017~microtubule-based process	16	1.09589	1.18938e-07	TUBB2B, KIF5A, TUBB2A, DCTN3, DCTN1, KIFC3, DYNLL1, DYNLL2, LYST, MAPT, KIFAP3, TUBB5, TUBA4A, TUBB4A, TUBB3, TUBB4B	5.20771	0.000451864	0.000112985	0.000219806																	11	1.91304	2.86955e-07	TUBB2B, KIF5A, LYST, KIFAP3, TUBB5, TUBA4A, TUBB4A, TUBB3, DCTN1, TUBB4B, KIFC3	8.84307	0.000690748	0.000172732	0.000504058
GOTERM_CC_DIRECT	GO:0000502~proteasome complex	18	1.23288	7.54846e-07	UBXN1, ELP2, SHFM1, PSMA7, PSMB4, PSMA1, PSMB6, PSMC5, PSMA6, PSMD12, PSMA5, PSMA4, PSMB3, PSMC1, PSMD1, PSMD2, PSMD4, PSMD7	4.1212	0.000571255	1.97039e-05	0.00115027																	10	1.73913	4.81775e-05	PSMB4, PSMA1, ELP2, PSMC5, PSMA5, PSMA4, PSMB3, PSMC1, PSMD1, PSMD2	5.81293	0.0247886	0.000737994	0.0697561
GOTERM_CC_DIRECT	GO:0031252~cell leading edge	13	0.890411	0.00110239	GBF1, SLK, LMO4, LDB1, VIM, CDC42BPA, ACTN1, WASL, TUBG1, BCAS3, DCTN1, SCRIB, CDC42BPB	2.97642	0.566114	0.0140524	1.66677																	10	1.73913	4.81775e-05	GBF1, SLK, LDB1, VIM, CDC42BPA, ACTN1, BCAS3, SCRIB, DCTN1, CDC42BPB	5.81293	0.0247886	0.000737994	0.0697561
GOTERM_CC_DIRECT	GO:0005884~actin filament	16	1.09589	0.000246459	MYO5A, COBL, VPS18, APC2, MYO1B, AKAP13, ACTN1, KEAP1, MYO9B, GAS7, TPM1, INPP5D, VPS16, VPS11, DBN1, PLS3	2.96074	0.170218	0.00387979	0.37491																	11	1.91304	4.80252e-05	MYO5A, VPS18, APC2, MYO1B, AKAP13, ACTN1, MYO9B, VPS16, VPS11, DBN1, PLS3	5.16794	0.0247113	0.000757946	0.0695357
GOTERM_BP_DIRECT	GO:0007030~Golgi organization																									13	2.26087	3.21741e-06	PLEKHM2, HTT, KIFC3, GAK, ARHGAP21, GBF1, GORASP1, DYNC2H1, DYM, USO1, BCAS3, LRRK2, MYO18A	5.56476	0.0077176	0.00154831	0.00565149
GOTERM_MF_DIRECT	GO:0016887~ATPase activity	30	2.05479	5.20019e-05	ATP5D, ATP5E, ATP5B, PEX6, HK1, INO80, MYO9B, ATP6V1G1, KIFC3, MACF1, DYNC2H1, ATP5L, ATP5O, HSPA5, ATP5I, DYNC1H1, ATP5H, HSPA8, MYO5B, ATP5J, ATP5J2, KIF3A, ATP1A2, ATP13A2, PSMC5, PSMC1, ATP5A1, SMARCA1, MYO18A, SMARCA4	2.26122	0.0580996	0.00298831	0.0836009																	18	3.13043	3.8929e-05	KIF3A, ATP5B, PEX6, HK1, INO80, MYO9B, ATP13A2, KIFC3, PSMC5, MACF1, PSMC1, DYNC2H1, ATP5A1, SMARCA1, DYNC1H1, MYO18A, MYO5B, SMARCA4	3.263	0.0280187	0.00189279	0.0590208
GOTERM_MF_DIRECT	GO:0008022~protein C-terminus binding	30	2.05479	0.0010715	SYT1, RAB3A, SYNJ1, VIM, PEX6, LMO7, RABAC1, DYNLL1, BRD4, NEFL, STMN3, MPDZ, PHB, PDZD11, PFKM, SHANK1, NCL, SHANK2, ECM1, SHANK3, EML2, PPP1R9B, PPP1R9A, AP2A1, RASGRF1, NEDD4, PHB2, PEX26, DGKZ, DNM1	1.89858	0.708862	0.0336958	1.70941																	20	3.47826	3.37639e-05	RAB3A, PHB, SYNJ1, VIM, PEX6, LMO7, PFKM, SHANK1, ECM1, SHANK2, SHANK3, PPP1R9B, PPP1R9A, AP2A1, RASGRF1, NEDD4, PHB2, DGKZ, NEFL, DNM1	3.0441	0.0243467	0.00189421	0.0511917
KEGG_PATHWAY	rno01230:Biosynthesis of amino acids~																									12	2.08696	8.37918e-05	BCAT1, GOT2, GLUL, PYCR2, ACO2, ALDOC, IDH2, PGAM1, TKT, PFKM, ENO1, PC	4.34293	0.0184306	0.00309563	0.106765
GOTERM_MF_DIRECT	GO:0047485~protein N-terminus binding	21	1.43836	0.000426786	MORF4L1, DAB2IP, ACTN4, STXBP1, SUV39H1, TPM1, PHB2, NPM1, AKAP6, PEX14, PARP1, GAD1, CALM2, UNC13A, EXOC2, NCOR2, PLEC, FEZ1, SMARCA4, CALM1, SPTAN1	2.3877	0.388191	0.018033	0.684186																	14	2.43478	7.3283e-05	DAB2IP, ACTN4, STXBP1, PHB2, AKAP6, PEX14, GAD1, UNC13A, NCOR2, EXOC2, SPTAN1, SMARCA4, PLEC, FEZ1	3.82834	0.0520927	0.00314203	0.111078
GOTERM_CC_DIRECT	GO:0005813~centrosome	56	3.83562	8.91546e-05	CROCC, WDR81, KIFC3, OFD1, DCAF12, DYNLL1, IFT20, DYNLL2, KIFAP3, PDE4B, IFT22, KLHL22, MKKS, CDK5RAP3, RANBP1, PRKACA, TUBG1, DYNC1H1, CEP295, ROCK2, UBR4, DCTN3, PCM1, DCTN1, ARL3, PRKCB, PSMA1, UXT, ZFYVE26, NME1, CLIP1, USP20, PDE4DIP, DYNLRB1, MDH1, IFT74, BRSK1, RILPL2, TUBGCP5, NPM1, NDRG2, HAP1, APC, KIF3A, RNF19A, RPGRIP1L, PHAX, CCT5, CCT4, CSNK1D, CCT8, FBXO31, MARCKS, CALM2, FEZ1, CAL…	1.71925	0.0652658	0.00160569	0.135773																	28	4.86957	0.000235817	CROCC, BRSK1, WDR81, KIFC3, KIFAP3, PDE4B, KLHL22, PRKACA, CDK5RAP3, NDRG2, DYNC1H1, HAP1, APC, KIF3A, ROCK2, RPGRIP1L, UBR4, PCM1, DCTN1, PRKCB, PSMA1, CCT5, ZFYVE26, FBXO31, USP20, CLIP1, PDE4DIP, FEZ1	2.18249	0.115626	0.00322833	0.341007
KEGG_PATHWAY	rno03050:Proteasome~	16	1.09589	5.19379e-06	SHFM1, PSMA7, PSMB4, PSMA1, PSMB6, PSMC5, PSMD12, PSMA6, PSMA5, PSMA4, PSMB3, PSMC1, PSMD1, PSMD2, PSMD4, PSMD7	3.93538	0.00130279	0.000118506	0.00675125																	9	1.56522	0.000134256	PSMB4, PSMA1, PSMC5, PSMA5, PSMA4, PSMB3, PSMC1, PSMD1, PSMD2	5.75207	0.0293669	0.00330638	0.171013
KEGG_PATHWAY	rno04922:Glucagon signaling pathway~																									13	2.26087	0.000107227	PYGM, GYS1, ACACA, PPP3CB, PGAM1, PRKACA, CAMK2B, PDHA1, PPP3CA, PCK2, CAMK2A, PDHB, PYGB	3.90502	0.0235244	0.00339502	0.136606
GOTERM_CC_DIRECT	GO:0042645~mitochondrial nucleoid	10	0.684932	0.00504703	UQCC2, TUFM, ACADVL, ATP5B, DHX30, VDAC2, HADHA, LRPPRC, HSPA9, VDAC1	3.00186	0.978296	0.0473279	7.42067																	8	1.3913	0.00029564	TUFM, ATP5B, DHX30, VDAC2, HADHA, LRPPRC, HSPA9, VDAC1	6.09712	0.142772	0.00394224	0.427344
GOTERM_CC_DIRECT	GO:0012505~endomembrane system	16	1.09589	0.0029664	TBC1D2B, RABGAP1, TBC1D8, MPDZ, TBC1D9, DOCK9, PIP5K1C, CD63, RTN2, RPS3, SGSM1, SGSM2, CDK5RAP3, MTOR, NENF, TBC1D9B	2.34928	0.894485	0.0311783	4.42616																	11	1.91304	0.000340564	TBC1D2B, RABGAP1, SGSM1, TBC1D8, TBC1D9, DOCK9, PIP5K1C, CDK5RAP3, MTOR, RTN2, TBC1D9B	4.10064	0.162609	0.00442678	0.492132
GOTERM_CC_DIRECT	GO:0016234~inclusion body	9	0.616438	0.00010975	WDFY3, PSMC5, SNCB, HTT, GYS1, LRRK2, AGL, HAP1, MT3	5.52616	0.0797273	0.00193035	0.167113																	6	1.04348	0.000357914	WDFY3, PSMC5, HTT, GYS1, LRRK2, HAP1	9.35354	0.170147	0.00453861	0.517143
GOTERM_CC_DIRECT	GO:0008021~synaptic vesicle	23	1.57534	0.000188296	MYO5A, SYT1, RAB3A, RAB3B, RAB3C, GABBR1, SNAPIN, BRSK1, SLC6A17, ATP6V1G1, VDAC2, DBI, VDAC3, VDAC1, RABAC1, PDE4B, SPTBN2, PEBP1, LRRK2, HAP1, HSPA8, DNM1, MT3	2.40847	0.132859	0.00316285	0.286553																	13	2.26087	0.000389359	MYO5A, RAB3A, RAB3B, RAB3C, PDE4B, SPTBN2, BRSK1, VDAC2, LRRK2, VDAC3, HAP1, DNM1, VDAC1	3.45622	0.183636	0.0048192	0.562458
GOTERM_MF_DIRECT	GO:0017137~Rab GTPase binding																									14	2.43478	0.000143734	MYO5A, GDI1, TBC1D2B, DENND5A, RABGAP1, TBC1D8, TBC1D9, BICD2, SGSM1, CHM, MICAL1, PRKACA, MYO5B, TBC1D9B	3.58527	0.0996157	0.0055076	0.217756
GOTERM_MF_DIRECT	GO:0044325~ion channel binding																									14	2.43478	0.000155703	ACTN4, HTT, ACTN1, ACTN2, VDAC1, PPP1R9B, PPP1R9A, ANK3, PDE4B, AKAP6, PKD1, LRRK2, HAP1, AP2M1	3.55704	0.10745	0.00566749	0.235869
GOTERM_MF_DIRECT	GO:0000146~microfilament motor activity																									6	1.04348	0.000225295	MYO5A, MYO1B, MYO1D, MYO9B, MYH14, MYH10	10.1897	0.151668	0.00780197	0.341122
GOTERM_MF_DIRECT	GO:0008432~JUN kinase binding																									5	0.869565	0.00025108	PTK2, KIF5B, MAPK8IP3, MAPK8IP1, GSTP1	14.667	0.167491	0.00829771	0.380094
KEGG_PATHWAY	rno00010:Glycolysis / Gluconeogenesis~																									10	1.73913	0.000467197	GPI, ALDOC, PGAM1, HK1, BPGM, PFKM, PDHA1, PCK2, PDHB, ENO1	4.29123	0.0985421	0.0086079	0.593947
GOTERM_MF_DIRECT	GO:0051018~protein kinase A binding																									6	1.04348	0.000292801	SPHKAP, DACT3, AKAP6, AKAP13, LRRK2, AKAP2	9.68023	0.192471	0.00925155	0.443122
KEGG_PATHWAY	rno00562:Inositol phosphate metabolism~																									10	1.73913	0.000707526	MTM1, PLCG1, PIK3C2A, PIK3CB, PIK3C3, SYNJ1, PI4KA, PIP5K1C, INPP4A, ITPKA	4.05927	0.145404	0.0111606	0.89821
GOTERM_BP_DIRECT	GO:0031175~neuron projection development	26	1.78082	8.02429e-05	HMGB1, MANF, PRMT1, BLOC1S4, PTK2B, ATXN10, MAPT, BLOC1S1, NEFH, CNTNAP1, HAP1, APC, STMN3, NCDN, STMN2, UBE4B, SNAPIN, DOCK7, FRY, PPP1R9B, PPP1R9A, RASGRF1, NEDD4, PRICKLE2, MAPK8IP3, MYH10	2.37646	0.262829	0.0215456	0.14819																	16	2.78261	3.75204e-05	NCDN, UBE4B, DOCK7, FRY, PPP1R9B, PPP1R9A, NEDD4, RASGRF1, ATXN10, PRICKLE2, NEFH, MAPK8IP3, CNTNAP1, HAP1, APC, MYH10	3.61211	0.0863894	0.0112303	0.0658872
GOTERM_MF_DIRECT	GO:0051020~GTPase binding																									7	1.21739	0.000388476	MFN2, RAB3A, HDAC3, PPP1R9A, GNB2, SPTBN1, ENO1	7.0585	0.246964	0.0117489	0.587517
GOTERM_BP_DIRECT	GO:0006511~ubiquitin-dependent protein catabolic process																									16	2.78261	5.14259e-05	ANAPC2, UBE3A, TOLLIP, USP9X, USP5, UBE4B, USP4, TOPORS, TTC3, PSMA1, CUL9, PSMA4, USP20, USP11, USP32, USP13	3.51579	0.116476	0.0136654	0.0902952
KEGG_PATHWAY	rno04152:AMPK signaling pathway~																									13	2.26087	0.000993761	SCD2, PPP2R3A, PIK3CB, ACACA, RPS6KB2, EEF2, PFKM, PCK2, TSC2, GYS1, FASN, MTOR, PPP2R2A	3.07482	0.198062	0.0137006	1.25947
KEGG_PATHWAY	rno04721:Synaptic vesicle cycle~	15	1.0274	0.000653867	SYT1, RAB3A, CLTA, AP2S1, STXBP1, ATP6V1B2, ATP6V1G1, ATP6V0B, ATP6V1F, ATP6V1A, AP2A1, ATP6V0A1, UNC13A, DNM1, AP2M1	2.79682	0.151406	0.0102084	0.846643																	9	1.56522	0.000939932	ATP6V1A, RAB3A, AP2A1, STXBP1, ATP6V0A1, ATP6V1B2, UNC13A, DNM1, AP2M1	4.36044	0.188412	0.0138211	1.19163
GOTERM_BP_DIRECT	GO:0010738~regulation of protein kinase A signaling																									6	1.04348	5.83335e-05	SPHKAP, PJA2, PDE4A, AKAP6, AKAP11, LRRK2	13.1842	0.131051	0.0139489	0.102418
GOTERM_MF_DIRECT	GO:0017048~Rho GTPase binding																									7	1.21739	0.000547145	ARHGEF2, ROCK2, DOCK9, AKAP13, MYO9B, LRRK2, CDC42BPB	6.6433	0.329361	0.0152489	0.826554
GOTERM_MF_DIRECT	GO:0019904~protein domain specific binding	39	2.67123	0.00159214	SCAF1, CHMP2A, SRCIN1, CBX3, DYNLL1, SORBS2, GSN, MAPT, TUBB5, PKD1, HSPA5, VPS11, NEFL, HAP1, DLGAP1, STMN3, DLGAP3, MYO1D, DLGAP4, LIN7B, STXBP1, ACTN1, ACTN2, BASP1, ST13, XPA, YWHAG, PPP1R9A, NOLC1, CPE, NEDD4, AKAP5, CABIN1, MTOR, NCOR1, AKAP2, CALM2, UNC13A, CALM1	1.69336	0.840229	0.0437463	2.53009																	22	3.82609	0.000655993	SCAF1, DLGAP1, DLGAP3, SRCIN1, DLGAP4, MYO1D, STXBP1, ACTN1, ACTN2, PPP1R9A, GSN, SORBS2, NEDD4, TUBB5, PKD1, MTOR, VPS11, NCOR1, AKAP2, NEFL, HAP1, UNC13A	2.29736	0.380617	0.0169628	0.990225
GOTERM_MF_DIRECT	GO:0030898~actin-dependent ATPase activity																									5	0.869565	0.000707299	MYO1B, MYO1D, MYO9B, MYH14, MYH10	11.5241	0.403402	0.0176531	1.06728
GOTERM_CC_DIRECT	GO:0044295~axonal growth cone	9	0.616438	0.00148843	COBL, KIF5B, MAPT, CYFIP1, MAPK8IP1, DBN1, OLFM1, APC, AATK	3.92179	0.676183	0.0174641	2.24428																	6	1.04348	0.00186122	KIF5B, CYFIP1, MAPK8IP1, DBN1, APC, AATK	6.63799	0.621145	0.0200178	2.66217
GOTERM_CC_DIRECT	GO:0035371~microtubule plus-end																									5	0.869565	0.00194161	MYO5A, CLIP1, CLIP2, DCTN1, APC	9.02534	0.636712	0.0204524	2.77565
GOTERM_CC_DIRECT	GO:0044297~cell body	18	1.23288	0.00070603	LZTS1, VIM, PINK1, CCT3, PARK7, RPL28, ACOT7, GLUL, CCT5, CCT4, GNB2, PTK2B, MAPT, CCT8, TUBB5, GSTO1, MAPK8IP1, SEPT7	2.50671	0.414128	0.00967388	1.0705																	10	1.73913	0.00206875	GLUL, CCT5, LZTS1, GNB2, VIM, TUBB5, PINK1, MAPK8IP1, CCT3, SEPT7	3.5357	0.660043	0.0213475	2.95488
GOTERM_MF_DIRECT	GO:0048365~Rac GTPase binding																									7	1.21739	0.00101168	CORO1C, ARHGEF2, WASF1, CYFIP1, DOCK7, ITPKA, NCKAP1	5.944	0.522363	0.0243293	1.52331
GOTERM_CC_DIRECT	GO:0035253~ciliary rootlet	5	0.342466	0.00435841	KIF5B, KIF5A, CROCC, KLC1, KIF5C	6.75419	0.963357	0.0431293	6.43943																	4	0.695652	0.00252488	KIF5B, KIF5A, CROCC, KIF5C	13.7185	0.732096	0.0250113	3.59536
GOTERM_CC_DIRECT	GO:0031982~vesicle																									13	2.26087	0.00268832	MYO5A, RAB3B, ARHGEF2, RAB3C, KIF5B, PIK3C2A, TKT, ATP13A2, GAK, CORO1C, GNB2, DPP7, GSTP1	2.76927	0.754019	0.0261152	3.82389
GOTERM_CC_DIRECT	GO:0005839~proteasome core complex	8	0.547945	0.000550813	PSMB4, PSMA1, PSMB6, PSMA6, PSMA5, PSMA4, PSMB3, PSMA7	5.14605	0.341032	0.00783856	0.836079																	5	0.869565	0.00286312	PSMB4, PSMA1, PSMA5, PSMA4, PSMB3	8.16578	0.775488	0.0272843	4.06776
KEGG_PATHWAY	rno04910:Insulin signaling pathway~																									13	2.26087	0.00230308	PYGM, PIK3CB, FLOT1, TSC2, GYS1, ACACA, FASN, RPS6KB2, HK1, PRKACA, MTOR, PCK2, PYGB	2.7893	0.400628	0.0280369	2.89656
GOTERM_CC_DIRECT	GO:0005777~peroxisome																									11	1.91304	0.00300611	MYO5A, TRIM37, GBF1, VIM, IDH2, PEX6, FDPS, PEX14, TKT, HSD17B4, AKAP11	3.09229	0.791651	0.0281161	4.26682
GOTERM_BP_DIRECT	GO:0007409~axonogenesis																									13	2.26087	0.000224452	RAB3A, ATL1, SPTBN4, FLOT1, PIP5K1C, CNP, DOCK7, BRSK1, ANK3, SLITRK5, KALRN, MYH10, APC	3.66228	0.417567	0.0332196	0.393536
GOTERM_BP_DIRECT	GO:0035176~social behavior																									9	1.56522	0.000204748	HTT, PPP3CB, MTOR, PCM1, SHANK1, SHANK2, GAD1, SHANK3, KALRN	5.49342	0.38926	0.0346073	0.359048
GOTERM_BP_DIRECT	GO:0000226~microtubule cytoskeleton organization																									11	1.91304	0.000220384	PTK2, MAP1S, CRMP1, CUL9, CDC42BPA, NEFH, DOCK7, CNP, NEFL, TUBA1B, NEFM	4.31626	0.411832	0.0347642	0.386416
GOTERM_MF_DIRECT	GO:0034237~protein kinase A regulatory subunit binding																									5	0.869565	0.00156214	PJA2, AKAP6, RYR2, PRKACA, AKAP11	9.49042	0.680583	0.0350358	2.34301
GOTERM_MF_DIRECT	GO:0035255~ionotropic glutamate receptor binding																									6	1.04348	0.00151345	NEDD4, FLOT1, SHANK1, SHANK2, MYO5B, SHANK3	6.91445	0.669006	0.0350377	2.27075
GOTERM_CC_DIRECT	GO:0005882~intermediate filament	13	0.890411	0.00438669	EIF6, MYO5A, NME2, NME1, PKP2, VIM, LMNA, NEFH, SYNM, NEFL, IFFO1, NEFM, HSPA8	2.54506	0.964136	0.0428449	6.47992																	8	1.3913	0.00386311	EIF6, MYO5A, VIM, NEFH, SYNM, NEFL, IFFO1, NEFM	3.97638	0.86689	0.0353697	5.45181
GOTERM_CC_DIRECT	GO:0005938~cell cortex																									11	1.91304	0.00401291	HIP1R, NEDD4, AKAP13, MYO9B, DBN1, GAD1, SEPT7, WDR81, APC, FRY, MYH10	2.97055	0.876921	0.035475	5.65753
GOTERM_CC_DIRECT	GO:0005769~early endosome	28	1.91781	0.00424551	MYO5A, HMGB1, CHMP3, RAP1GAP, RAB5C, PTPN23, EEA1, SNX3, APOE, GRIPAP1, BLOC1S1, TRAK1, VPS16, VPS11, HAP1, WDFY1, VPS18, PLEKHJ1, MYO1B, PHB, FLOT1, RABEP1, TRAPPC9, IGF2R, MIB2, COMMD1, VPS28, ANKFY1	1.77575	0.960072	0.0425893	6.27763																	15	2.6087	0.00395925	MYO5A, VPS18, WDFY1, RAP1GAP, MYO1B, RAB5C, PHB, FLOT1, PTPN23, TRAPPC9, MIB2, TRAK1, VPS16, VPS11, HAP1	2.41523	0.873418	0.0356112	5.58389
GOTERM_BP_DIRECT	GO:0006099~tricarboxylic acid cycle	12	0.821918	3.90001e-06	DLST, ACO2, SUCLG1, SDHD, OGDHL, IDH2, IDH3B, PDHA1, SUCLA2, PDHB, FH, MDH1	5.52197	0.0147108	0.00211492	0.00720723																	7	1.21739	0.000196621	ACO2, OGDHL, IDH2, PDHA1, SUCLA2, PDHB, FH	7.95599	0.377188	0.0357685	0.344819
KEGG_PATHWAY	rno00500:Starch and sucrose metabolism~																									6	1.04348	0.0032321	GPI, PYGM, GYS1, HK1, PYGB, PGM2L1	5.81392	0.512609	0.0371192	4.04293
GOTERM_MF_DIRECT	GO:0019894~kinesin binding																									7	1.21739	0.00173209	KIF3A, PLEKHM2, KIF5A, CROCC, KIFAP3, MAPK8IP3, MAPK8IP1	5.37791	0.717908	0.0376232	2.59479
GOTERM_CC_DIRECT	GO:0008540~proteasome regulatory particle, base subcomplex																									4	0.695652	0.0044323	PSMC5, PSMC1, PSMD1, PSMD2	11.4321	0.901171	0.0378382	6.23128
GOTERM_CC_DIRECT	GO:0030123~AP-3 adaptor complex																									4	0.695652	0.0044323	VPS18, AP3D1, VPS16, VPS11	11.4321	0.901171	0.0378382	6.23128
GOTERM_CC_DIRECT	GO:0016328~lateral plasma membrane																									7	1.21739	0.00467299	CORO1C, ANK3, PRICKLE2, PKD1, ACTN1, APC, SPTAN1	4.44582	0.912868	0.0385957	6.55908
GOTERM_CC_DIRECT	GO:0005765~lysosomal membrane																									15	2.6087	0.00466686	VPS18, RAB5C, FLOT1, ATP6V1B2, TECPR1, ATP13A2, AP5B1, ATP6V1A, LRP1, GNB2, ZFYVE26, AP3D1, MTOR, VPS16, VPS11	2.37071	0.912588	0.0391653	6.55075
KEGG_PATHWAY	rno04728:Dopaminergic synapse~																									12	2.08696	0.00360985	PPP2R3A, GNB2, KIF5B, KIF5A, KIF5C, PPP3CB, PRKACA, CAMK2B, PPP3CA, CAMK2A, PPP2R2A, PRKCB	2.79429	0.551944	0.0393469	4.50549
GOTERM_MF_DIRECT	GO:0042802~identical protein binding	74	5.06849	0.000235955	SYT1, IER5, TRPV1, ATL1, CBX3, B2M, NONO, OFD1, RABAC1, TTR, DPY30, PRMT1, SLK, ATXN10, APOE, TARDBP, PSMD4, ROBO2, S100A1, DAB2IP, BAIAP2, STXBP1, CST3, ACTN2, PFKM, NCL, STK4, DAPK1, ST13, GLUL, NME1, DACT3, IGF2R, SNRNP200, RYR2, ABAT, COMMD1, WASL, LRRK2, DYNLRB1, SEPT7, MAPRE3, BCAT1, GATSL2, SNX8, VIM, USP4, NFKBIA, PSMA7, ALDH1A1, PTK2, RILPL2, DRAP1, FASN, RGD1304704, NEFL, HAP1, TNPO3, E…	1.53451	0.237853	0.0103924	0.378807																	35	6.08696	0.00189363	BCAT1, GATSL2, ATL1, SNX8, USP4, VIM, PTK2, SLK, ATXN10, FASN, NEFL, HAP1, TNPO3, ECI1, HCN2, DAB2IP, HTT, STXBP1, ACTN2, PFKM, SHANK1, STK4, SHANK3, SH3BP4, GLUL, MAP1S, DACT3, SNRNP200, CDC42BPA, ABAT, RYR2, MAPK8IP1, LRRK2, SEPT7, DNM1	1.74553	0.749341	0.039879	2.83356
GOTERM_CC_DIRECT	GO:0031965~nuclear membrane	28	1.91781	0.00128644	NDUFB4, MTDH, MRPS15, MRPS14, AHCTF1, RB1CC1, RANBP6, MRPL19, GSTO1, PUM2, TNPO2, DNAJC2, APC, TNPO3, GTF3C3, MCM3AP, NOS1, MRPS23, NOS1AP, LMNA, CST3, PCM1, PTGDS, RPS6KA2, IPO4, AKAP6, NSMF, CDK11B	1.92977	0.622605	0.0155943	1.9425																	14	2.43478	0.00497419	MCM3AP, NOS1AP, RB1CC1, RANBP6, MRPL19, AKAP6, AHCTF1, NSMF, PUM2, TNPO2, PCM1, APC, GTF3C3, TNPO3	2.44974	0.925579	0.0403997	6.9678
GOTERM_MF_DIRECT	GO:0031625~ubiquitin protein ligase binding	39	2.67123	0.000579933	UQCRC1, TOLLIP, UCHL1, PINK1, NFKBIA, UBE2V2, NEDD8, RBX1, SUMO2, MAP1LC3A, CUL9, PCBP2, DNAJA1, TUBB5, PRKACA, HSPA5, TUBA1B, NDUFS2, HSPA8, TRAF3, HSPA9, USP13, RNF31, UBXN1, ANAPC2, GABARAPL2, AMBRA1, HERC2, BTBD9, TRIM37, MFN2, GPI, UBE2K, SIPA1L1, TCEB2, JAK1, KLHL11, LRPPRC, MPHOSPH8	1.78583	0.487111	0.0213083	0.928626																	20	3.47826	0.00200006	ANAPC2, UQCRC1, TOLLIP, PINK1, HERC2, AMBRA1, BTBD9, MFN2, TRIM37, GPI, CUL9, SIPA1L1, TUBB5, KLHL11, PRKACA, TUBA1B, NDUFS2, LRPPRC, USP13, HSPA9	2.20256	0.768112	0.0408974	2.99056
GOTERM_BP_DIRECT	GO:0061001~regulation of dendritic spine morphogenesis																									5	0.869565	0.000339088	PPP1R9A, SRCIN1, SIPA1L1, LRRK2, SHANK3	13.7336	0.558096	0.0469033	0.593965
GOTERM_MF_DIRECT	GO:0009055~electron carrier activity	16	1.09589	9.77604e-06	GCDH, GLRX5, ACADS, CYC1, CYB5A, ACADL, NDUFA12, POR, GLRX2, ACADVL, UQCR11, ETFDH, FDX1L, ACAD9, ETFB, NDUFS1	3.83331	0.0111892	0.00070302	0.0157214
GOTERM_MF_DIRECT	GO:0019899~enzyme binding	52	3.56164	5.50441e-05	CBX3, RPS2, RPS19BP1, CTNNBL1, RPS3, GSTM1, GOT2, PRMT1, DYNLL1, ATXN10, MAPT, PCBP2, CUTA, SLC25A4, LDB1, MTA1, CYB5A, PRKCE, POR, TAF10, NME2, NME1, IGF2R, PEBP1, AKAP6, TUBA4A, RYR2, PDE4DIP, KALRN, KMT2E, GLUD1, NFKBIA, TXN1, OAZ1, PTK2B, NPM1, PPP3CB, PPP3CA, HSPA5, HSPA8, HSPA9, NOS1, PHB, UBE4B, SOD1, DDX5, ECM1, PARK7, NOP14, HDAC3, DYM, PARP1	1.79348	0.0613921	0.00301248	0.0884895
GOTERM_BP_DIRECT	GO:0021762~substantia nigra development	14	0.958904	3.54899e-05	LOC688869, GLUD1, PADI2, CNP, BASP1, MBP, DYNLL1, NDRG2, HSPA5, NDUFS3, CALM2, S100A1, CALM1, ATP5J	3.89222	0.126165	0.0133959	0.0655673
GOTERM_MF_DIRECT	GO:0051539~4 iron, 4 sulfur cluster binding	10	0.684932	0.000513674	ISCU, ISCA2, ACO2, NDUFV1, NDUFS8, ETFDH, NDUFS2, NTHL1, NDUFS1, RTEL1	4.06564	0.446443	0.0208996	0.822939
GOTERM_MF_DIRECT	GO:0032947~protein complex scaffold	12	0.821918	0.000536127	LAMTOR5, ISCU, HCN2, MAGI3, LAMTOR4, DLGAP3, LAMTOR2, PKP2, RB1CC1, AKAP6, AKAP13, AKAP11	3.42551	0.460573	0.0210595	0.858766
KEGG_PATHWAY	rno00620:Pyruvate metabolism	11	0.753425	0.00168141	ME3, ACSS1, ACYP2, ACACA, ALDH2, PDHA1, PCK2, PDHB, FH, MDH1, PC	3.17905	0.344521	0.0245403	2.16377
GOTERM_CC_DIRECT	GO:0008180~COP9 signalosome	9	0.616438	0.00229533	PLCG1, DYNLL1, FLOT1, WDR6, DOCK7, HSPA5, NCKIPSD, ATP5A1, BASP1	3.68411	0.824403	0.0260127	3.44118
GOTERM_CC_DIRECT	GO:0042470~melanosome	16	1.09589	0.00238117	MYO5A, ERP29, FLOT1, NAP1L1, CNP, ATP6V1B2, CD63, CCT4, PPIB, SGSM2, MYH11, FASN, ATP6V0A1, HSPA5, PDCD6IP, HSPA8	2.40149	0.835476	0.0265763	3.5677
GOTERM_MF_DIRECT	GO:0030234~enzyme regulator activity	8	0.547945	0.000786978	YWHAG, PSMD1, COX6A2, PSMD2, COX6A1, MTMR9, CALM2, CALM1	4.87876	0.59593	0.0270861	1.2582
GOTERM_CC_DIRECT	GO:0031307~integral component of mitochondrial outer membrane	7	0.479452	0.00254476	FIS1, TOMM7, GDAP1, TOMM20, RHOT2, PINK1, TOMM22	4.72794	0.854683	0.0275671	3.80839
GOTERM_CC_DIRECT	GO:0019773~proteasome core complex, alpha-subunit complex	5	0.342466	0.00277676	PSMA1, PSMA6, PSMA5, PSMA4, PSMA7	7.50466	0.878146	0.0296229	4.14877
GOTERM_MF_DIRECT	GO:0003743~translation initiation factor activity	13	0.890411	0.000995173	EIF6, EIF5B, EIF1B, DENR, MTIF2, EIF3D, EIF3A, EIF3G, EIF2S2, EIF4A1, EIF3L, RPS24, EIF2B5	3.00717	0.682099	0.0331446	1.58856
GOTERM_CC_DIRECT	GO:0035327~transcriptionally active chromatin	7	0.479452	0.00334234	WDR61, AFF4, PSIP1, PADI2, BCAS3, ZC3H8, CTR9	4.5028	0.92069	0.0345875	4.97383
GOTERM_CC_DIRECT	GO:0032433~filopodium tip	6	0.410959	0.00352426	MYO5A, MYO10, UBE2K, AP2A1, CYFIP1, MYO9B	5.40336	0.930926	0.0359486	5.23781
GOTERM_BP_DIRECT	GO:0009060~aerobic respiration	10	0.684932	0.000182429	UQCRC2, OXA1L, UQCRC1, UQCRH, NDUFV1, COX20, BLOC1S1, COX6A2, COX6A1, UQCRB	4.60164	0.500074	0.0377841	0.336604
GOTERM_BP_DIRECT	GO:0015991~ATP hydrolysis coupled proton transport	11	0.753425	0.000173561	ATP6V1A, ATP5B, ATP6V0A1, ATP5G2, ATP5G1, ATP1A2, ATP5A1, ATP6V1B2, ATP5G3, ATP6V0B, ATP6V1F	4.19406	0.482937	0.0380563	0.320266
GOTERM_MF_DIRECT	GO:0004298~threonine-type endopeptidase activity	8	0.547945	0.0014002	PSMB4, PSMA1, PSMB6, PSMA6, PSMA5, PSMA4, PSMB3, PSMA7	4.4722	0.800664	0.0415531	2.22829
GOTERM_MF_DIRECT	GO:0003714~transcription corepressor activity	22	1.50685	0.00159639	CTBP2, GMNN, HIRA, KCTD1, MTA1, BASP1, DMAP1, HSBP1, DDIT3, CITED2, HDAC5, HDAC3, DRAP1, HIPK2, BRD7, MAP3K10, PEX14, NCOR1, KDM5B, CRYM, NCOR2, SMARCA4	2.10832	0.841009	0.0428389	2.53676
GOTERM_CC_DIRECT	GO:0005838~proteasome regulatory particle	5	0.342466	0.00435841	PSMC5, PSMD12, PSMC1, PSMD2, PSMD7	6.75419	0.963357	0.0431293	6.43943
GOTERM_MF_DIRECT	GO:0003899~DNA-directed RNA polymerase activity	9	0.616438	0.00155245	POLR2G, POLR2F, POLR2E, POLR2K, POLR2J, POLR1C, POLR3B, POLR2B, POLR3D	3.89514	0.832749	0.0437219	2.46776
GOTERM_MF_DIRECT	GO:0000062~fatty-acyl-CoA binding	10	0.684932	0.00154952	ACADVL, GCDH, ACOT7, ACADS, ACADL, ACAD9, DBI, SCP2, ACBD6, HADHA	3.53068	0.832182	0.0447346	2.46315
GOTERM_BP_DIRECT	GO:0010976~positive regulation of neuron projection development	24	1.64384	0.00028579	HMGB1, DAB2IP, STMN2, ENC1, UBE2V2, SNX3, FIG4, PPP1R9A, NME2, PCP4, NME1, PTK2B, NDRG4, PTN, RANBP1, MARCKS, CAMK2B, HSPA5, NCKIPSD, MTOR, DBN1, APBB1, HAP1, FEZ1	2.28767	0.662489	0.0461265	0.526841
GOTERM_CC_DIRECT	GO:0005770~late endosome	19	1.30137	0.0048386	MYO5A, VPS18, CHMP3, HTT, LAMTOR2, CD63, ATP13A2, DDIT3, MTM1, MAP1LC3A, TRAPPC9, APOE, IGF2R, PIK3C3, VPS16, VPS11, PIK3R4, HAP1, HSPA8	2.05327	0.974567	0.0465655	7.1247
KEGG_PATHWAY	rno03013:RNA transport	26	1.78082	0.00352469	XPO5, EIF5B, EIF3D, SUMO2, EIF3A, EIF3G, RBM8A, SRRM1, ACIN1, GEMIN7, EIF2B5, RPP21, EEF1A2, ALYREF, SAP18, EIF1B, PHAX, UPF3B, EIF2S2, EIF4A1, CYFIP2, CYFIP1, THOC5, POP5, THOC2, POP7	1.83271	0.587805	0.0480442	4.48614
GOTERM_CC_DIRECT	GO:0043204~perikaryon									19	2.76565	2.41287e-06	FUS, BRD1, KCNC3, AIF1, KCNB1, NELL2, GRIK4, MAP1B, FMR1, SLC12A5, CTNND2, GRIK5, GRIA3, PDPK1, GRIA2, RESP18, CRH, NGFR, CACNA1A	3.82138	0.00128764	0.000257662	0.0035067
GOTERM_MF_DIRECT	GO:0003682~chromatin binding									37	5.38574	3.02134e-06	ENY2, NKAP, TSHZ3, HMGN3, MEF2A, CAMTA2, SOX2, BAP1, NR3C1, CBFA2T3, ANKRD17, SMARCD3, PRMT5, SMARCD1, TPR, SUPT5H, CHD5, TAF2, KAT2A, SSRP1, CEBPB, SSBP1, CREBBP, TADA2B, FMR1, POLR1A, CDK9, COQ7, MBD1, HDAC4, BAZ1B, MSL1, NCOA6, DNMT1, SMC1A, RNF20, SMARCA2	2.36442	0.00224234	0.000748006	0.00459261
GOTERM_MF_DIRECT	GO:0046982~protein heterodimerization activity									40	5.82242	2.58441e-05	KCNH1, S100A4, RBP4, MEF2A, PPARD, ADCY5, ARNT2, SOX2, BCL2L2, NR3C1, NRN1, HIST1H4B, POLE3, SOS1, PRMT5, TEF, ENO3, SUPT5H, TUBA1A, TYRO3, CEBPB, CAPNS1, SUCLG2, RXRB, KCNB1, FMR1, HMG20B, HOMER1, USF1, CABYR, USF2, BCL2L10, CHRAC1, CYBA, MAPK6, BAX, ITGAD, SMC1A, SCGB2A2, HIST1H2AN	2.06881	0.0190193	0.00478911	0.0392783
GOTERM_CC_DIRECT	GO:0032590~dendrite membrane									7	1.01892	0.000137504	KCNC1, ATF4, GABARAPL1, KCNC3, KCNB1, SLC12A5, NGFR	8.39094	0.0708009	0.00812595	0.199657
GOTERM_CC_DIRECT	GO:0036464~cytoplasmic ribonucleoprotein granule									7	1.01892	0.000137504	DYNC1I1, MYH1, RPLP0, FMR1, PABPC1, TUBA1A, HNRNPU	8.39094	0.0708009	0.00812595	0.199657
GOTERM_MF_DIRECT	GO:0008270~zinc ion binding									62	9.02475	5.79112e-05	CHURC1, LIMA1, S100A6, PPARD, QPCTL, S100A8, ZMAT3, MRFAP1, PHF20, ZNRF2, JADE1, TRIM2, NR2F6, RANBP2, RARB, SREK1IP1, NR2F1, RXRB, TADA2B, POLR1A, MMP17, ZSWIM8, MBD1, ZFR, ZCCHC17, MORC2, MYT1L, TIMM8A1, BAZ1B, ZMIZ2, NBR1, CPD, ST18, ZADH2, RNF20, FUS, NANOS3, MME, NR3C1, RABGGTB, RNFT2, GLO1, USP33, CHD5, DHX58, TAF2, RECQL4, BRD1, CRIP1, ESRRA, BMP1, SHPRH, CREBBP, BIRC7, MARCH8, HDAC4, MNAT…	1.69156	0.0421166	0.00856892	0.0879942
KEGG_PATHWAY	rno05215:Prostate cancer
GOTERM_CC_DIRECT	GO:0005783~endoplasmic reticulum
GOTERM_CC_DIRECT	GO:0043195~terminal bouton
KEGG_PATHWAY	rno04114:Oocyte meiosis
KEGG_PATHWAY	rno04141:Protein processing in endoplasmic reticulum
GOTERM_CC_DIRECT	GO:0022624~proteasome accessory complex
KEGG_PATHWAY	rno04261:Adrenergic signaling in cardiomyocytes
GOTERM_CC_DIRECT	GO:0005789~endoplasmic reticulum membrane
GOTERM_CC_DIRECT	GO:0000139~Golgi membrane
GOTERM_CC_DIRECT	GO:0010008~endosome membrane
GOTERM_BP_DIRECT	GO:0015031~protein transport
GOTERM_BP_DIRECT	GO:0045471~response to ethanol
GOTERM_CC_DIRECT	GO:0005901~caveola
GOTERM_CC_DIRECT	GO:0030672~synaptic vesicle membrane
GOTERM_CC_DIRECT	GO:0060077~inhibitory synapse
GOTERM_CC_DIRECT	GO:0030659~cytoplasmic vesicle membrane
GOTERM_CC_DIRECT	GO:0043231~intracellular membrane-bounded organelle
GOTERM_BP_DIRECT	GO:0043066~negative regulation of apoptotic process
KEGG_PATHWAY	rno05031:Amphetamine addiction
GOTERM_MF_DIRECT	GO:0008565~protein transporter activity
GOTERM_MF_DIRECT	GO:0051117~ATPase binding
GOTERM_CC_DIRECT	GO:1903561~extracellular vesicle
KEGG_PATHWAY	rno04727:GABAergic synapse
KEGG_PATHWAY	rno04713:Circadian entrainment
GOTERM_CC_DIRECT	GO:0005791~rough endoplasmic reticulum
GOTERM_CC_DIRECT	GO:0005788~endoplasmic reticulum lumen
GOTERM_CC_DIRECT	GO:0030117~membrane coat
GOTERM_CC_DIRECT	GO:0031594~neuromuscular junction
GOTERM_CC_DIRECT	GO:0043679~axon terminus
GOTERM_CC_DIRECT	GO:0031012~extracellular matrix
GOTERM_CC_DIRECT	GO:0044306~neuron projection terminus
GOTERM_CC_DIRECT	GO:0000930~gamma-tubulin complex
GOTERM_MF_DIRECT	GO:0051287~NAD binding
GOTERM_CC_DIRECT	GO:0097060~synaptic membrane
GOTERM_CC_DIRECT	GO:0005790~smooth endoplasmic reticulum
GOTERM_CC_DIRECT	GO:0048786~presynaptic active zone
GOTERM_CC_DIRECT	GO:0031045~dense core granule
KEGG_PATHWAY	rno04966:Collecting duct acid secretion
GOTERM_BP_DIRECT	GO:0001975~response to amphetamine
KEGG_PATHWAY	rno04020:Calcium signaling pathway
GOTERM_CC_DIRECT	GO:0005758~mitochondrial intermembrane space
GOTERM_BP_DIRECT	GO:0048168~regulation of neuronal synaptic plasticity
GOTERM_CC_DIRECT	GO:0005869~dynactin complex
GOTERM_CC_DIRECT	GO:0008541~proteasome regulatory particle, lid subcomplex
GOTERM_CC_DIRECT	GO:0030132~clathrin coat of coated pit
GOTERM_MF_DIRECT	GO:0042803~protein homodimerization activity
KEGG_PATHWAY	rno04720:Long-term potentiation
GOTERM_MF_DIRECT	GO:0005085~guanyl-nucleotide exchange factor activity
GOTERM_BP_DIRECT	GO:0043524~negative regulation of neuron apoptotic process
GOTERM_MF_DIRECT	GO:0050998~nitric-oxide synthase binding
GOTERM_BP_DIRECT	GO:0042493~response to drug
GOTERM_BP_DIRECT	GO:0006749~glutathione metabolic process
GOTERM_CC_DIRECT	GO:0005911~cell-cell junction
GOTERM_CC_DIRECT	GO:0030673~axolemma
GOTERM_BP_DIRECT	GO:0007568~aging
GOTERM_CC_DIRECT	GO:0042734~presynaptic membrane
GOTERM_BP_DIRECT	GO:0016192~vesicle-mediated transport
KEGG_PATHWAY	rno04924:Renin secretion
GOTERM_MF_DIRECT	GO:0017075~syntaxin-1 binding
GOTERM_MF_DIRECT	GO:0015631~tubulin binding
GOTERM_MF_DIRECT	GO:0008144~drug binding
GOTERM_MF_DIRECT	GO:0017124~SH3 domain binding
GOTERM_CC_DIRECT	GO:0017053~transcriptional repressor complex
GOTERM_CC_DIRECT	GO:0042383~sarcolemma
GOTERM_MF_DIRECT	GO:0070064~proline-rich region binding
GOTERM_MF_DIRECT	GO:0005522~profilin binding
KEGG_PATHWAY	rno04390:Hippo signaling pathway
GOTERM_CC_DIRECT	GO:0032587~ruffle membrane
GOTERM_MF_DIRECT	GO:0008307~structural constituent of muscle
GOTERM_CC_DIRECT	GO:0030017~sarcomere
GOTERM_CC_DIRECT	GO:0000776~kinetochore
KEGG_PATHWAY	rno04510:Focal adhesion
GOTERM_CC_DIRECT	GO:0005768~endosome
KEGG_PATHWAY	rno05216:Thyroid cancer
GOTERM_CC_DIRECT	GO:0034399~nuclear periphery
GOTERM_BP_DIRECT	GO:0006351~transcription, DNA-templated
GOTERM_BP_DIRECT	GO:0007420~brain development
GOTERM_CC_DIRECT	GO:0071598~neuronal ribonucleoprotein granule
KEGG_PATHWAY	rno05200:Pathways in cancer
GOTERM_MF_DIRECT	GO:0008134~transcription factor binding
KEGG_PATHWAY	rno05203:Viral carcinogenesis
GOTERM_BP_DIRECT	GO:0000122~negative regulation of transcription from RNA polymerase II promoter
GOTERM_CC_DIRECT	GO:0071944~cell periphery
GOTERM_CC_DIRECT	GO:0072372~primary cilium
GOTERM_MF_DIRECT	GO:0008092~cytoskeletal protein binding
GOTERM_BP_DIRECT	GO:0008360~regulation of cell shape
GOTERM_CC_DIRECT	GO:0005912~adherens junction
GOTERM_BP_DIRECT	GO:0045892~negative regulation of transcription, DNA-templated
GOTERM_MF_DIRECT	GO:0030674~protein binding, bridging
GOTERM_CC_DIRECT	GO:0000118~histone deacetylase complex
GOTERM_MF_DIRECT	GO:0044212~transcription regulatory region DNA binding
KEGG_PATHWAY	rno04520:Adherens junction
GOTERM_BP_DIRECT	GO:0007015~actin filament organization
GOTERM_BP_DIRECT	GO:0051764~actin crosslink formation
GOTERM_CC_DIRECT	GO:0098793~presynapse
GOTERM_CC_DIRECT	GO:0005923~bicellular tight junction
GOTERM_BP_DIRECT	GO:0048709~oligodendrocyte differentiation
GOTERM_BP_DIRECT	GO:0045893~positive regulation of transcription, DNA-templated
GOTERM_BP_DIRECT	GO:0000381~regulation of alternative mRNA splicing, via spliceosome
KEGG_PATHWAY	rno04925:Aldosterone synthesis and secretion
GOTERM_BP_DIRECT	GO:0006913~nucleocytoplasmic transport
GOTERM_CC_DIRECT	GO:0031527~filopodium membrane
KEGG_PATHWAY	rno04916:Melanogenesis
KEGG_PATHWAY	rno04024:cAMP signaling pathway
KEGG_PATHWAY	rno04915:Estrogen signaling pathway
KEGG_PATHWAY	rno04918:Thyroid hormone synthesis
GOTERM_MF_DIRECT	GO:0005509~calcium ion binding
KEGG_PATHWAY	rno05030:Cocaine addiction
KEGG_PATHWAY	rno05210:Colorectal cancer
KEGG_PATHWAY	rno04310:Wnt signaling pathway
GOTERM_MF_DIRECT	GO:0051219~phosphoprotein binding
KEGG_PATHWAY	rno05206:MicroRNAs in cancer
KEGG_PATHWAY	rno03008:Ribosome biogenesis in eukaryotes
KEGG_PATHWAY	rno04550:Signaling pathways regulating pluripotency of stem cells
GOTERM_CC_DIRECT	GO:0016604~nuclear body
GOTERM_MF_DIRECT	GO:0045295~gamma-catenin binding
GOTERM_MF_DIRECT	GO:0003730~mRNA 3'-UTR binding
KEGG_PATHWAY	rno05169:Epstein-Barr virus infection
KEGG_PATHWAY	rno05217:Basal cell carcinoma
KEGG_PATHWAY	rno04971:Gastric acid secretion
KEGG_PATHWAY	rno04666:Fc gamma R-mediated phagocytosis
KEGG_PATHWAY	rno05414:Dilated cardiomyopathy
GOTERM_BP_DIRECT	GO:0006357~regulation of transcription from RNA polymerase II promoter
KEGG_PATHWAY	rno04270:Vascular smooth muscle contraction
KEGG_PATHWAY	rno05213:Endometrial cancer
GOTERM_MF_DIRECT	GO:0008179~adenylate cyclase binding
KEGG_PATHWAY	rno05100:Bacterial invasion of epithelial cells
GOTERM_MF_DIRECT	GO:0003677~DNA binding
GOTERM_CC_DIRECT	GO:0005862~muscle thin filament tropomyosin
GOTERM_CC_DIRECT	GO:0030130~clathrin coat of trans-Golgi network vesicle
GOTERM_CC_DIRECT	GO:0044304~main axon
GOTERM_BP_DIRECT	GO:0000380~alternative mRNA splicing, via spliceosome
GOTERM_BP_DIRECT	GO:0030182~neuron differentiation
GOTERM_BP_DIRECT	GO:0030818~negative regulation of cAMP biosynthetic process
GOTERM_BP_DIRECT	GO:0061003~positive regulation of dendritic spine morphogenesis
GOTERM_BP_DIRECT	GO:0006397~mRNA processing
GOTERM_CC_DIRECT	GO:0005635~nuclear envelope
GOTERM_CC_DIRECT	GO:0005881~cytoplasmic microtubule
GOTERM_MF_DIRECT	GO:0001077~transcriptional activator activity, RNA polymerase II core promoter proximal region sequence-specific binding
GOTERM_BP_DIRECT	GO:0045944~positive regulation of transcription from RNA polymerase II promoter
GOTERM_CC_DIRECT	GO:0005875~microtubule associated complex
GOTERM_MF_DIRECT	GO:0031490~chromatin DNA binding
GOTERM_BP_DIRECT	GO:0090090~negative regulation of canonical Wnt signaling pathway
GOTERM_BP_DIRECT	GO:0022409~positive regulation of cell-cell adhesion
GOTERM_BP_DIRECT	GO:0061178~regulation of insulin secretion involved in cellular response to glucose stimulus
GOTERM_MF_DIRECT	GO:0060002~plus-end directed microfilament motor activity
GOTERM_BP_DIRECT	GO:0016079~synaptic vesicle exocytosis
GOTERM_MF_DIRECT	GO:0043130~ubiquitin binding
GOTERM_BP_DIRECT	GO:0001708~cell fate specification
GOTERM_MF_DIRECT	GO:0031694~alpha-2A adrenergic receptor binding
GOTERM_MF_DIRECT	GO:0050815~phosphoserine binding
GOTERM_MF_DIRECT	GO:1990715~mRNA CDS binding
GOTERM_MF_DIRECT	GO:0071889~14-3-3 protein binding
GOTERM_MF_DIRECT	GO:0030971~receptor tyrosine kinase binding
GOTERM_MF_DIRECT	GO:0071837~HMG box domain binding
GOTERM_MF_DIRECT	GO:0042826~histone deacetylase binding
GOTERM_MF_DIRECT	GO:0003713~transcription coactivator activity
GOTERM_BP_DIRECT	GO:0035019~somatic stem cell population maintenance
GOTERM_BP_DIRECT	GO:0022008~neurogenesis
GOTERM_BP_DIRECT	GO:0006936~muscle contraction
GOTERM_BP_DIRECT	GO:0043525~positive regulation of neuron apoptotic process
GOTERM_BP_DIRECT	GO:0035308~negative regulation of protein dephosphorylation
GOTERM_BP_DIRECT	GO:0030100~regulation of endocytosis
GOTERM_BP_DIRECT	GO:0090102~cochlea development
GOTERM_BP_DIRECT	GO:0060306~regulation of membrane repolarization
GOTERM_BP_DIRECT	GO:0043484~regulation of RNA splicing
GOTERM_BP_DIRECT	GO:0045214~sarcomere organization
GOTERM_BP_DIRECT	GO:0048663~neuron fate commitment
GOTERM_BP_DIRECT	GO:0021987~cerebral cortex development
GOTERM_BP_DIRECT	GO:0043588~skin development
GOTERM_BP_DIRECT	GO:0051489~regulation of filopodium assembly
GOTERM_BP_DIRECT	GO:0006606~protein import into nucleus
GOTERM_BP_DIRECT	GO:0007265~Ras protein signal transduction
GOTERM_BP_DIRECT	GO:0030335~positive regulation of cell migration
GOTERM_BP_DIRECT	GO:0006376~mRNA splice site selection
GOTERM_BP_DIRECT	GO:0040008~regulation of growth
GOTERM_BP_DIRECT	GO:0045859~regulation of protein kinase activity
GOTERM_BP_DIRECT	GO:0051017~actin filament bundle assembly
GOTERM_BP_DIRECT	GO:0030575~nuclear body organization
GOTERM_BP_DIRECT	GO:0060632~regulation of microtubule-based movement
GOTERM_BP_DIRECT	GO:0007009~plasma membrane organization
GOTERM_BP_DIRECT	GO:0086004~regulation of cardiac muscle cell contraction
GOTERM_BP_DIRECT	GO:0007623~circadian rhythm
GOTERM_BP_DIRECT	GO:0051726~regulation of cell cycle
GOTERM_BP_DIRECT	GO:0051493~regulation of cytoskeleton organization
GOTERM_BP_DIRECT	GO:0060070~canonical Wnt signaling pathway
GOTERM_BP_DIRECT	GO:0030155~regulation of cell adhesion
GOTERM_BP_DIRECT	GO:0033077~T cell differentiation in thymus
GOTERM_BP_DIRECT	GO:0021766~hippocampus development
GOTERM_BP_DIRECT	GO:0016601~Rac protein signal transduction
GOTERM_BP_DIRECT	GO:0060996~dendritic spine development
GOTERM_BP_DIRECT	GO:0019827~stem cell population maintenance
GOTERM_BP_DIRECT	GO:0045669~positive regulation of osteoblast differentiation
GOTERM_BP_DIRECT	GO:0010508~positive regulation of autophagy
GOTERM_BP_DIRECT	GO:0008340~determination of adult lifespan
GOTERM_BP_DIRECT	GO:0006811~ion transport
GOTERM_BP_DIRECT	GO:0045668~negative regulation of osteoblast differentiation
GOTERM_BP_DIRECT	GO:0050680~negative regulation of epithelial cell proliferation
GOTERM_BP_DIRECT	GO:0003192~mitral valve formation
GOTERM_BP_DIRECT	GO:0032053~ciliary basal body organization
GOTERM_BP_DIRECT	GO:0030154~cell differentiation
GOTERM_BP_DIRECT	GO:0016477~cell migration
GOTERM_BP_DIRECT	GO:0090002~establishment of protein localization to plasma membrane
GOTERM_BP_DIRECT	GO:0000278~mitotic cell cycle
GOTERM_BP_DIRECT	GO:0003273~cell migration involved in endocardial cushion formation
GOTERM_BP_DIRECT	GO:0023051~regulation of signaling
GOTERM_BP_DIRECT	GO:0031547~brain-derived neurotrophic factor receptor signaling pathway
GOTERM_BP_DIRECT	GO:0032648~regulation of interferon-beta production
GOTERM_BP_DIRECT	GO:0045165~cell fate commitment
GOTERM_BP_DIRECT	GO:0030334~regulation of cell migration
GOTERM_BP_DIRECT	GO:0045599~negative regulation of fat cell differentiation
GOTERM_BP_DIRECT	GO:0030838~positive regulation of actin filament polymerization
GOTERM_BP_DIRECT	GO:0090103~cochlea morphogenesis
GOTERM_BP_DIRECT	GO:0021915~neural tube development
GOTERM_BP_DIRECT	GO:1990090~cellular response to nerve growth factor stimulus
GOTERM_BP_DIRECT	GO:0001731~formation of translation preinitiation complex
GOTERM_BP_DIRECT	GO:0010001~glial cell differentiation
GOTERM_BP_DIRECT	GO:0032465~regulation of cytokinesis
GOTERM_BP_DIRECT	GO:0071560~cellular response to transforming growth factor beta stimulus
GOTERM_CC_DIRECT	GO:0014704~intercalated disc
GOTERM_CC_DIRECT	GO:0031461~cullin-RING ubiquitin ligase complex
KEGG_PATHWAY	rno04022:cGMP-PKG signaling pathway
GOTERM_CC_DIRECT	GO:0008076~voltage-gated potassium channel complex
KEGG_PATHWAY	rno04723:Retrograde endocannabinoid signaling
KEGG_PATHWAY	rno05212:Pancreatic cancer
KEGG_PATHWAY	rno05161:Hepatitis B
KEGG_PATHWAY	rno04725:Cholinergic synapse
KEGG_PATHWAY	rno04062:Chemokine signaling pathway
KEGG_PATHWAY	rno04730:Long-term depression
KEGG_PATHWAY	rno05221:Acute myeloid leukemia
KEGG_PATHWAY	rno04930:Type II diabetes mellitus
KEGG_PATHWAY	rno04611:Platelet activation
KEGG_PATHWAY	rno05231:Choline metabolism in cancer
GOTERM_CC_DIRECT	GO:0030315~T-tubule
KEGG_PATHWAY	rno04662:B cell receptor signaling pathway
GOTERM_MF_DIRECT	GO:0048027~mRNA 5'-UTR binding
KEGG_PATHWAY	rno04970:Salivary secretion
KEGG_PATHWAY	rno04071:Sphingolipid signaling pathway
KEGG_PATHWAY	rno04917:Prolactin signaling pathway
KEGG_PATHWAY	rno05160:Hepatitis C
KEGG_PATHWAY	rno04914:Progesterone-mediated oocyte maturation
KEGG_PATHWAY	rno04120:Ubiquitin mediated proteolysis
KEGG_PATHWAY	rno04912:GnRH signaling pathway
KEGG_PATHWAY	rno05222:Small cell lung cancer
KEGG_PATHWAY	rno04960:Aldosterone-regulated sodium reabsorption
KEGG_PATHWAY	rno04350:TGF-beta signaling pathway
KEGG_PATHWAY	rno04911:Insulin secretion
GOTERM_MF_DIRECT	GO:0003746~translation elongation factor activity
GOTERM_CC_DIRECT	GO:0005637~nuclear inner membrane
GOTERM_MF_DIRECT	GO:0030506~ankyrin binding
GOTERM_CC_DIRECT	GO:0005784~Sec61 translocon complex
GOTERM_CC_DIRECT	GO:0005827~polar microtubule
GOTERM_MF_DIRECT	GO:0004842~ubiquitin-protein transferase activity
GOTERM_MF_DIRECT	GO:0097110~scaffold protein binding
GOTERM_MF_DIRECT	GO:0050833~pyruvate transmembrane transporter activity
GOTERM_MF_DIRECT	GO:0043022~ribosome binding
GOTERM_CC_DIRECT	GO:0034706~sodium channel complex
GOTERM_CC_DIRECT	GO:0005776~autophagosome
GOTERM_CC_DIRECT	GO:0045121~membrane raft
GOTERM_BP_DIRECT	GO:0034765~regulation of ion transmembrane transport
GOTERM_BP_DIRECT	GO:0042391~regulation of membrane potential
GOTERM_BP_DIRECT	GO:1902361~mitochondrial pyruvate transmembrane transport
GOTERM_BP_DIRECT	GO:0032355~response to estradiol
GOTERM_BP_DIRECT	GO:0071805~potassium ion transmembrane transport
GOTERM_BP_DIRECT	GO:0000461~endonucleolytic cleavage to generate mature 3'-end of SSU-rRNA from (SSU-rRNA, 5.8S rRNA, LSU-rRNA)
GOTERM_BP_DIRECT	GO:0001754~eye photoreceptor cell differentiation
GOTERM_BP_DIRECT	GO:0061732~mitochondrial acetyl-CoA biosynthetic process from pyruvate
GOTERM_BP_DIRECT	GO:0006414~translational elongation
GOTERM_BP_DIRECT	GO:0042787~protein ubiquitination involved in ubiquitin-dependent protein catabolic process
GOTERM_BP_DIRECT	GO:0086010~membrane depolarization during action potential
GOTERM_BP_DIRECT	GO:0050877~neurological system process
GOTERM_BP_DIRECT	GO:0045727~positive regulation of translation
GOTERM_BP_DIRECT	GO:0051899~membrane depolarization
GOTERM_BP_DIRECT	GO:0001508~action potential
GOTERM_BP_DIRECT	GO:0016567~protein ubiquitination
GOTERM_BP_DIRECT	GO:0006006~glucose metabolic process
GOTERM_BP_DIRECT	GO:0045087~innate immune response
GOTERM_MF_DIRECT	GO:0031072~heat shock protein binding
GOTERM_BP_DIRECT	GO:0070588~calcium ion transmembrane transport
GOTERM_BP_DIRECT	GO:0032091~negative regulation of protein binding
GOTERM_BP_DIRECT	GO:1901660~calcium ion export
GOTERM_BP_DIRECT	GO:0071333~cellular response to glucose stimulus
GOTERM_BP_DIRECT	GO:0009615~response to virus
GOTERM_BP_DIRECT	GO:0032467~positive regulation of cytokinesis
GOTERM_MF_DIRECT	GO:0005249~voltage-gated potassium channel activity
GOTERM_BP_DIRECT	GO:0019228~neuronal action potential
GOTERM_BP_DIRECT	GO:0048015~phosphatidylinositol-mediated signaling
GOTERM_BP_DIRECT	GO:0043161~proteasome-mediated ubiquitin-dependent protein catabolic process
GOTERM_BP_DIRECT	GO:0042133~neurotransmitter metabolic process
GOTERM_BP_DIRECT	GO:0048515~spermatid differentiation
GOTERM_BP_DIRECT	GO:0007628~adult walking behavior
GOTERM_BP_DIRECT	GO:0007283~spermatogenesis
GOTERM_BP_DIRECT	GO:0071345~cellular response to cytokine stimulus
GOTERM_BP_DIRECT	GO:0000447~endonucleolytic cleavage in ITS1 to separate SSU-rRNA from 5.8S rRNA and LSU-rRNA from tricistronic rRNA transcript (SSU-rRNA, 5.8S rRNA, LSU-rRNA)
GOTERM_BP_DIRECT	GO:0003360~brainstem development
GOTERM_BP_DIRECT	GO:0010628~positive regulation of gene expression
GOTERM_BP_DIRECT	GO:0002931~response to ischemia
GOTERM_BP_DIRECT	GO:0019227~neuronal action potential propagation
GOTERM_BP_DIRECT	GO:1990416~cellular response to brain-derived neurotrophic factor stimulus
GOTERM_BP_DIRECT	GO:0009791~post-embryonic development
GOTERM_BP_DIRECT	GO:0033129~positive regulation of histone phosphorylation
GOTERM_BP_DIRECT	GO:0038095~Fc-epsilon receptor signaling pathway
GOTERM_BP_DIRECT	GO:1902188~positive regulation of viral release from host cell
GOTERM_BP_DIRECT	GO:0042220~response to cocaine
GOTERM_BP_DIRECT	GO:0071316~cellular response to nicotine
GOTERM_BP_DIRECT	GO:1904322~cellular response to forskolin
GOTERM_BP_DIRECT	GO:2000637~positive regulation of gene silencing by miRNA
GOTERM_BP_DIRECT	GO:0009636~response to toxic substance
GOTERM_BP_DIRECT	GO:1901215~negative regulation of neuron death
[truncated: 40 more columns]
