# Supplementary material for: Axon TRAP reveals learning-associated alterations in cortical axonal mRNAs in the lateral amygdala
Source: eLife. 2019 Dec 11;8:e51607. doi: 10.7554/eLife.51607 (PMC6924958; doi:10.7554/eLife.51607)
Supplement: Supplementary file 5. [file elife-51607-supp5.xlsx]

## Sheet: Supplementary file 5
ANOVA on log2(FPKM) by group
F(28,7829.1)=199.8, p<0.0001
				Bonferroni test p values
Control axons	downAxUpCtx	downAxOnly	upAxonsDownCtx	upAxonsOnly	downCtxOnly	upCtxOnly	unregAxons	unregCtx
downAxUpCtx		0.000505	0	1	0	0	1.6e-05	0
downAxOnly	0.000505		0	0	1	0	1	0.000718
upAxonsDownCtx	0	0		0	0	0	0	0
upAxonsOnly	1	0	0		0	0	0	0
downCtxOnly	0	1	0	0		0.003101	1	1
upCtxOnly	0	0	0	0	0.003101		0.018665	0.073226
unregAxons	1.6e-05	1	0	0	1	0.018665		1
unregCtx	0	0.000718	0	0	1	0.073226	1
Control cortex	downAxUpCtx	downAxOnly	upAxonsDownCtx	upAxonsOnly	downCtxOnly	upCtxOnly	unregAxons	unregCtx
downAxUpCtx		0.930684	0	0	0.21284	0	0.002551	1
downAxOnly	0.930684		0	0	8.3e-05	0	0.54606	0.013335
upAxonsDownCtx	0	0		0	0	0	0	0
upAxonsOnly	0	0	0		0	0	0	0
downCtxOnly	0.21284	8.3e-05	0	0		0	0	1
upCtxOnly	0	0	0	0	0		0.039436	0
unregAxons	0.002551	0.54606	0	0	0	0.039436		1.8e-05
unregCtx	1	0.013335	0	0	1	0	1.8e-05
Trained axons	downAxUpCtx	downAxOnly	upAxonsDownCtx	upAxonsOnly	downCtxOnly	upCtxOnly	unregAxons	unregCtx
downAxUpCtx		0.003638	0	0	1	0	0.491914	0.08882
downAxOnly	0.003638		0	0	0.074486	0.014049	1	1
upAxonsDownCtx	0	0		0	0	0	0	0
upAxonsOnly	0	0	0		0	0	0	0
downCtxOnly	1	0.074486	0	0		0	1	0.878122
upCtxOnly	0	0.014049	0	0	0		0.025298	0.000104
unregAxons	0.491914	1	0	0	1	0.025298		1
unregCtx	0.08882	1	0	0	0.878122	0.000104	1
Trained cortex	downAxUpCtx	downAxOnly	upAxonsDownCtx	upAxonsOnly	downCtxOnly	upCtxOnly	unregAxons	unregCtx
downAxUpCtx		0	0	0.000582	0	0	0	4.6e-05
downAxOnly	0		0	0	1	0.0514	0.341716	1
upAxonsDownCtx	0	0		0	0	0	0	0
upAxonsOnly	0.000582	0	0		0	0	0	0
downCtxOnly	0	1	0	0		1	1	0.385172
upCtxOnly	0	0.0514	0	0	1		1	0.000353
unregAxons	0	0.341716	0	0	1	1		0.010086
unregCtx	4.6e-05	1	0	0	0.385172	0.000353	0.010086
