# Supplementary material for: Axon TRAP reveals learning-associated alterations in cortical axonal mRNAs in the lateral amygdala
Source: eLife. 2019 Dec 11;8:e51607. doi: 10.7554/eLife.51607 (PMC6924958; doi:10.7554/eLife.51607)
Supplement: Supplementary file 6. [file elife-51607-supp6.xlsx]

## Sheet: Supplementary file 6
IPA Upstream Regulators		Axons						Cortex
Regulator	Molecule Type	Expr Fold Change	Predicted Activation State	Activation z-score	p-value of overlap	Target molecules	# Targets	Expr Fold Change	Predicted Activation State	Activation z-score	p-value of overlap	Target molecules	# Targets
ADORA2A	g-protein coupled receptor		Inhibited	-2.584	7.38e-07	ALDOC,ARF3,ATP1A2,Atp5e,ATP6V1B2,CAMKV,CCT5,DGKZ,EEF2,FBL,GDI1,GPI,KIF5A,KIF5B,KLC1,PGAM1,PMPCA,RAB3A,SPTBN1,TUBB3,TUBB4A,USP5	22			1.732	0.00674	ATP5E,ATP6V1B2,CAMKV,CKB,DGKZ,EEF2,FBL,KIF5B,KLC1,SPTBN1,TUBB3,TUBB4A	12
APAF1	other				0.00696	DDIT3,HSPA5	2
APP	other			1.199	4.11e-13	ACO2,ACTN2,ALDOC,APOE,ATOX1,ATP1A2,ATP5A1,ATP5B,ATP5D,Atp5e,ATP5H,ATP5J,ATP6V1A,CKMT1A/CKMT1B,CLTA,Cox6c,DBI,DNM1,DPYSL2,DYNLL2,ENO1,FABP3,FBL,GAP43,GNA12,GOT2,GSTP1,H2AFV,HINT1,HIST1H2BD,HK1,Hnrnpa3,HSPA5,IGFBP2,MAPT,MDK,Mt3,NDUFA5,NDUFS4,NENF,PCP4,PEBP1,PGAM1,PIN1,PPIA,PRDX5,PVALB,S100B,SEPT7,SNCB,SOD1,SPTAN1,STMN2,STXBP1,SUCLG1,Tpm1,TPT1,TTR,TUBA4A,TUBB,TUBB2B,TUBB3,TUBB4B,TUFM,TXN,UCHL1,UQCRH…	69			-0.919	4.54e-10	ACTN2,APOE,ATOX1,ATP5B,ATP5D,Atp5e,ATP5H,ATP5J,ATP6V1A,BAX,CKB,CKMT1A/CKMT1B,CLTA,Cox6c,CRYM,DBI,DPYSL2,DYNLL2,ENPP2,FBL,GAP43,GOT2,GSTP1,HINT1,HK1,Hnrnpa3,HSP90AA1,MAP2,Mt3,NDUFA5,NDUFS4,NENF,NOG,PCP4,PIN1,PPIA,PRDX5,PVALB,S100B,SNCB,SOD1,SPTAN1,STMN2,STXBP1,SUCLG1,Tpm1,TPT1,TUBA4A,TUBB,TUBB3,TXN,UQCRHL,UQCRQ	53
CREB3	transcription regulator				0.0236	DDIT3,HSPA5,UBXN4	3
DAG1	transmembrane receptor				0.0372	CNP,MBP	2
EOMES	transcription regulator			1.982	0.393	CCK,NEFL,Nefm,ROBO2	4			-1.026	0.00987	CCK,CRYM,DNAJC15,FAT3,MAP2K6,NEFL,NEFM	7
FKBP1B	enzyme				0.00696	MTOR,RYR2	2				0.00416	MTOR,RYR2	2
FMR1	translation regulator			0.389	6.84e-07	AGAP1,ATP5L,ATPIF1,CAMK2A,DLGAP3,EEF2,ENO1,GAP43,PFN1,PIK3CB,PPIA,PRKACA,RAB3A,UQCRFS1,UQCRQ	15			1.32	0.000262	AGAP1,ATP5L,ATPIF1,CAMK2A,DLGAP3,EEF2,GAP43,PPIA,UQCRFS1,UQCRQ	10
GLDN	other				0.0197	ANK3,SPTBN4	2
GPR37	g-protein coupled receptor				0.0197	HSPA5,MAP1LC3A	2
HTT	transcription regulator	-1.89		1.346	0.0328	ACTN2,ATP5A1,ATP5B,B2M,BAIAP2,CAMK2A,CAMK2B,CCK,COX6A1,DLST,GAD1,Gm21596/Hmgb1,GSN,HAP1,HTT,MLF2,Mt3,NDUFS3,Nefm,NGEF,NPTX1,PCP4,PPP1R1A,PPP3CA,PRKCB,PSMA5,RAP1GAP,SPTAN1,SST,STXBP1,UCHL1	31				0.000876	ACTN2,ADCY5,ARPP21,ATP5B,B2M,BCL11B,CAMK2A,CAMK2B,CCK,CCND1,COX6A1,DLST,ENPP2,FABP7,FAM173A,Gm21596/Hmgb1,GSN,HOMER1,MAP2,Mt3,Nefm,PCP4,PIK3CA,PPP1R16B,PRKCB,RAP1GAP,RARB,RBP4,SPTAN1,SST,STXBP1	31
IGF1	growth factor			-0.505	0.0179	CNP,IGFBP2,Mbp,NEFH,Nefm,SST	6			1.172	0.0234	MBP,NEFH,NEFM,NR3C1,SST	5
LMX1A	transcription regulator				0.0236	COX6A1,NDUFA2,UQCRQ	3			-1	0.000977	CDKN1B,COX6A1,NDUFA2,UQCRQ	4
LMX1B	transcription regulator				0.0236	COX6A1,NDUFA2,UQCRQ	3			-1	0.000977	CDKN1B,COX6A1,NDUFA2,UQCRQ	4
LPIN1	phosphatase				0.0197	APOE,FASN	2				0.0119	APOE,FASN	2
MAPT	other	1.209			3.68e-19	ACO2,ATOX1,ATP1A2,ATP5A1,ATP5B,ATP5D,Atp5e,ATP5H,ATP5J,ATP6V1A,BSN,CKMT1A/CKMT1B,CLTA,Cox6c,DBI,DPYSL2,DYNLL2,ENO1,FBL,GNA12,GOT2,GSTP1,H2AFV,HINT1,HIST1H2BD,HK1,Hnrnpa3,HSPA5,MAPT,Mt3,NDUFA5,NDUFS4,PCP4,PEBP1,PGAM1,PPIA,PRDX5,PVALB,S100B,SNCB,SOD1,SPTAN1,STMN2,STXBP1,SUCLG1,Tpm1,TPT1,TUBA4A,TUBB,TUBB2B,TUBB3,TUBB4B,TUFM,TXN,UCHL1,UQCRHL,UQCRQ,VDAC1	58				6.78e-17	ATOX1,ATP5B,ATP5D,Atp5e,ATP5H,ATP5J,ATP6V1A,BSN,CCND1,CDKN1B,CKB,CKMT1A/CKMT1B,CLTA,Cox6c,CRYM,DBI,DPYSL2,DYNLL2,FBL,GOT2,GSTP1,HINT1,HK1,Hnrnpa3,HSP90AA1,MAP2,Mt3,NDUFA5,NDUFS4,PCP4,PPIA,PRDX5,PVALB,S100B,SNCB,SOD1,SPTAN1,STMN2,STXBP1,SUCLG1,Tpm1,TPT1,TUBA4A,TUBB,TUBB3,TXN,UQCRHL,UQCRQ	48
MKNK1	kinase		Inhibited	-2.683	2.84e-05	AP3D1,APC,ARVCF,CAMK2A,CRMP1,DCTN1,GAP43,HSD17B4,KIF5A,KLC1,MAPK8IP3,MAPT,MYO5A,NCDN,RAB3A,STXBP1,TTC3,USO1,VIM,YWHAG	20		Activated	2.138	0.00143	ACOT7,AP3D1,CAMK2A,DCTN1,FLNB,GAP43,HSPA4L,KLC1,MAPK8IP3,MYO5A,STXBP1,TTC3,USO1,YWHAG	14
MTOR	kinase	-1.633	Activated	2.688	2.47e-05	CNP,DCTN1,EIF3A,FABP5,FDPS,GAP43,GSTM5,MDH1,MICAL1,PFN1,PPIB,PRDX5,PYGB,RPL12,RPS18,SOD1,UQCRC2	17
MYCBP2	enzyme	-1.569	Activated	2	0.0187	HDAC5,MYO5A,PRKCB,ROCK2	4
NFASC	other			-1.937	0.000254	ANK3,DCTN1,DYNLRB1,KIF5A,KIF5C,KLC1,SPTBN4	7			1.387	0.00356	DCTN1,DYNLRB1,KIF5C,KLC1,SPTBN4	5
NRCAM	other				0.0197	ANK3,SPTBN4	2
PPARGC1A	transcription regulator			0.336	0.00592	ATP5A1,ATP5O,NEFH,PVALB,SOD1	5			-0.854	0.0132	ATP5O,NEFH,PVALB,SOD1	4
PSEN1	peptidase			-1.432	1.35e-13	ACO2,ACSL1,APOE,ATOX1,ATP1A2,ATP5A1,ATP5B,ATP5D,Atp5e,ATP5H,ATP5J,ATP6V1A,C1QA,CKMT1A/CKMT1B,CLTA,Cox6c,COX8A,DBI,DPYSL2,DYNLL2,ENO1,FBL,GNA12,GOT2,GSTP1,H2AFV,HINT1,HIST1H2BD,HK1,Hnrnpa3,HSPA5,KIF5B,LRP1,MAPT,Mt3,NDUFA5,NDUFS4,PCP4,PEBP1,PGAM1,PPIA,PRDX5,PVALB,RYR2,S100B,SNCB,SOD1,SPTAN1,STMN2,STXBP1,SUCLG1,Tpm1,TPT1,TUBA4A,TUBB,TUBB2B,TUBB3,TUBB4B,TUFM,TXN,UCHL1,UQCRHL,UQCRQ,VDAC1	64			0.218	1.91e-12	APOE,ATOX1,ATP5B,ATP5D,Atp5e,ATP5H,ATP5J,ATP6V1A,CCND1,CKB,CKMT1A/CKMT1B,CLTA,Cox6c,COX8A,CRYM,DBI,DPYSL2,DYNLL2,ENPP2,FBL,GOT2,GSTP1,HINT1,HK1,Hnrnpa3,HSP90AA1,KIF5B,LRP1,MAP2,MME,Mt3,NDUFA5,NDUFS4,PCP4,PPIA,PRDX5,PVALB,RYR2,S100B,SNCB,SOD1,SPTAN1,STMN2,STXBP1,SUCLG1,Tpm1,TPT1,TUBA4A,TUBB,TUBB3,TXN,UQCRHL,UQCRQ	53
RPS6KB1	kinase				0.00696	DLGAP3,RPS6KB2	2
RTN4	other			-0.378	0.0117	DPYSL2,DYNC1H1,GNB2,MAPRE3,NEFL,Tpm1,TUBB4A,YWHAG	8			1.134	0.00251	DPYSL2,DYNC1H1,MAP2,MAPRE3,NEFL,TPM1,TUBB4A,YWHAG	8
SNCA	enzyme			-0.186	0.041	CHGB,DCTN1,DNM1,GSN,HSBP1,HSPA5,ITPA,KIF3A,LRRK2,Nefm,PYGB,RAB3A,SCG2,UCHL1,UQCRHL,YWHAG	16			0.186	0.0455	CHGB,CRYM,DCTN1,GSN,KIF3A,LRRK2,NEFM,PYGB,RBP4,SCG2,TUBG1,UQCRHL,YWHAG	13
TCF7L2	transcription regulator		Inhibited	-3.051	1	AATK,ACSL1,ANKIB1,ATP6V1G1,CNP,DOCK9,GSN,HIPK2,ID4,KIF5B,MAP4K4,NCOR2,TPRN	13
TLX1	transcription regulator				0.0236	CCK,SST,TAC1	3				0.0117	CCK,SST,TAC1	3
UBA6	enzyme				0.0197	SHANK3,UBE3A	2
ZFHX3	transcription regulator				0.00687	GSTP1,NAA38,PYGM,RNF168,RPS14,RPS28,SSB,SST,TAC1,TOP1,TUBB2B,TUBB3	12				0.023	GSTP1,NAA38,NGFR,RPS14,RPS28,SSB,SST,TAC1,TUBB3	9
ZNF746	transcription regulator				0.0197	COX4I1,PDHA1	2				0.0119	COX4I1,PDHA1	2
BDNF										-1.114	0.0277	CCND2,DNAJC21,GAP43,GRB14,HOMER1,NGFR,SST,TAC1,TBC1D8,TRAF3,TUBB3	11
Cdkn1c											0.0471	CDKN1B,MBP,NGFR	3
CTNNB1											0.0497	CCND1,GAP43,NGFR,SOX2	4
GATA2											0.00102	CCND1,CDKN1B,SOX2	3
HTR6											0.0119	DYNC1I1,KIF3A	2
MECP2										0.577	0.00413	CAMK2A,CAMK2B,CRH,CYB5A,FXYD1,SELENOK,SLC12A5,UQCRC1	8
NR3C1								1.718			0.0365	BAX,CRH,DDIT4,GRIA2,GRIN2C,NR3C1,TLE3	7
RICTOR											0.00462	MBP,PRKCB,PRKCG	3
SLC6A2											0.0365	CLSTN1,DYNLL1	2
SOD1								-1.409			0.00755	APOE,B2M,CKB,HDDC3,HN1,Mt3,NDUFV3,NEFH,NEFL,Nefm,PCP4,RDX,SCG5,SOD1,TUBB4A	15
SSTR3											0.0229	DYNC1I1,KIF3A	2
TLX3										-1.981	0.00561	CCK,GRIA2,SST,TAC1	4
TSC2								2.526		-0.426	0.0194	ATF4,B3GALT2,CBLN1,DYNC1I1,GAP43,GSN,METRN,PVALB	8
ZFP36L2											0.0365	NEFH,NEFM	2
ZIC1											0.0119	CCND1,CDKN1B	2
ZIC2											0.0229	CCND1,CDKN1B	2
