# Supplementary material for: Axon TRAP reveals learning-associated alterations in cortical axonal mRNAs in the lateral amygdala
Source: eLife. 2019 Dec 11;8:e51607. doi: 10.7554/eLife.51607 (PMC6924958; doi:10.7554/eLife.51607)
Supplement: Supplementary file 7. [file elife-51607-supp7.xlsx]

## Sheet: Supplementary file 7
IPA Molecular and Cellular Functions			Axons					Cortex
Categories	Functions	Diseases or Functions Annotation	p-value	Predicted Activation State	Activation z-score	Molecules	# Genes	p-value	Predicted Activation State	Activation z-score	Molecules	# Genes
Cell Morphology, Cellular Assembly and Organization, Cellular Function and Maintenance	formation	formation of cellular protrusions	3.26e-06	Decreased	-1.529	AGAP2,AKAP5,ANAPC2,ANK3,APC,APOE,ATL1,ATXN10,BAIAP2,BICDL1,BRSK1,BSN,CAMK2A,CAMK2B,CCK,CELSR2,CLSTN1,CNP,CNTNAP1,CRMP1,CYFIP1,DAB2IP,DBN1,DOCK7,DPYSL2,ELMO1,ENC1,FBXO31,FLOT1,GAP43,GAS7,GDI1,GIT1,HAP1,Hmgb1,HTT,KALRN,KIF3A,LRP1,LRRK2,MAP1S,MAPK8IP1,MAPK8IP3,MAPT,Mbp,METRN,MFN2,MINK1,MTOR,MYH10,MYO5A,MYO5B,NCDN,Nedd4,NEFH,NEFL,Nefm,NSMF,NYAP1,OPA1,PFN1,PIP5K1C,PPP1R9A,PPP1R9B,PPP3CA,PRICKLE2,PRKAC…	93	0.000637	Increased	1.229	APOE,ARFGEF1,ATL1,BCL11B,BRSK1,BSN,CAMK2A,CAMK2B,CAPNS1,CCK,CKB,CLSTN1,DAB2IP,DBN1,DOCK7,DPYSL2,ENC1,FBXO31,GAP43,GIT1,Hmgb1,HSP90AA1,KALRN,KIF3A,LLGL1,LRP1,LRRK2,MAP1S,MAP2,MAPK8IP1,MAPK8IP3,Mbp,METRN,MINK1,MTOR,MYH10,MYO5A,Nedd4,NEFH,NEFL,Nefm,NGFR,NRN1,NSMF,PIK3CA,PIP5K1C,PPP1R9A,PPP1R9B,PVALB,RASGRF1,RDX,ROR2,RYR2,S100B,SHANK2,SHANK3,SIPA1L1,SIRPA,SLC12A5,SNCB,SOD1,SPTBN2,SPTBN4,TSC2,UBE4B,UL…	67
Cell Morphology, Cellular Assembly and Organization, Cellular Development, Cellular Function and Maintenance, Cellular Growth and Proliferation, Nervous System Development and Function, Organismal Development, Tissue Development	neuritogenesis	neuritogenesis	4.32e-06	Decreased	-1.145	AGAP2,AKAP5,ANAPC2,ANK3,APC,APOE,ATL1,ATXN10,BAIAP2,BICDL1,BRSK1,BSN,CAMK2A,CAMK2B,CCK,CELSR2,CLSTN1,CNP,CNTNAP1,CRMP1,CYFIP1,DAB2IP,DBN1,DOCK7,DPYSL2,ELMO1,ENC1,FBXO31,FLOT1,GAP43,GAS7,GDI1,GIT1,HAP1,Hmgb1,HTT,KALRN,KIF3A,LRP1,LRRK2,MAP1S,MAPK8IP1,MAPK8IP3,MAPT,Mbp,METRN,MFN2,MINK1,MTOR,MYH10,MYO5A,MYO5B,NCDN,Nedd4,NEFH,NEFL,Nefm,NSMF,NYAP1,OPA1,PFN1,PIP5K1C,PPP1R9A,PPP1R9B,PPP3CA,PRICKLE2,PTK2,…	92	0.000861	Increased	1.104	APOE,ARFGEF1,ATL1,BCL11B,BRSK1,BSN,CAMK2A,CAMK2B,CAPNS1,CCK,CKB,CLSTN1,DAB2IP,DBN1,DOCK7,DPYSL2,ENC1,FBXO31,GAP43,GIT1,Hmgb1,KALRN,KIF3A,LLGL1,LRP1,LRRK2,MAP1S,MAP2,MAPK8IP1,MAPK8IP3,Mbp,METRN,MINK1,MTOR,MYH10,MYO5A,Nedd4,NEFH,NEFL,Nefm,NGFR,NRN1,NSMF,PIK3CA,PIP5K1C,PPP1R9A,PPP1R9B,PVALB,RASGRF1,RDX,ROR2,RYR2,S100B,SHANK2,SHANK3,SIPA1L1,SIRPA,SLC12A5,SNCB,SOD1,SPTBN2,SPTBN4,TSC2,UBE4B,ULK2,Wasl	66
Cellular Assembly and Organization, Cellular Function and Maintenance	organization	microtubule dynamics	5.79e-06	Decreased	-1.634	AATK,AGAP2,AKAP5,ANAPC2,ANK3,APC,APOE,ATL1,ATXN10,BAIAP2,BICDL1,BRSK1,BSN,CAMK2A,CAMK2B,CCK,CELSR2,CLSTN1,CNP,CNTNAP1,CRMP1,CYFIP1,DAB2IP,DBN1,DOCK7,DPYSL2,ELMO1,ENC1,FBXO31,FLOT1,GAP43,GAS7,GDI1,GIT1,GSN,HAP1,Hmgb1,HTT,KALRN,KIF3A,KIF5A,LRP1,LRRK2,MAP1S,MAPK8IP1,MAPK8IP3,MAPT,Mbp,METRN,MFN2,MINK1,MTOR,MYH10,MYO5A,MYO5B,NCDN,Nedd4,NEFH,NEFL,Nefm,NSMF,NYAP1,OLFM1,OPA1,PFN1,PIP5K1C,PJA2,PPP1R9A,PPP…	102	0.00126	Increased	0.941	APOE,ARFGEF1,ATL1,BAX,BCL11B,BRSK1,BSN,CAMK2A,CAMK2B,CAPNS1,CCK,CKB,CLSTN1,DAB2IP,DBN1,DOCK7,DPYSL2,ENC1,FBXO31,GAP43,GIT1,GSN,Hmgb1,HSP90AA1,KALRN,KIF3A,LLGL1,LRP1,LRRK2,MAP1S,MAP2,MAPK8IP1,MAPK8IP3,Mbp,METRN,MINK1,MTOR,MYH10,MYO5A,Nedd4,NEFH,NEFL,Nefm,NGFR,NRN1,NSMF,OLFM1,PIK3CA,PIP5K1C,PPP1R9A,PPP1R9B,PPP3CB,PVALB,RASGRF1,RDX,ROR2,RYR2,S100B,SHANK2,SHANK3,SIPA1L1,SIRPA,SLC12A5,SMURF1,SNCB,SOD1…	73
Cell Morphology, Nervous System Development and Function, Tissue Morphology	morphology	morphology of axons	1.31e-05			AATK,APOE,CKMT1A/CKMT1B,CNP,CNTNAP1,GABBR1,GAP43,HTT,KALRN,KIF5A,KLC1,LMNA,LRRK2,MAPT,MFN2,Mt3,NEFH,NEFL,Nefm,PLEC,PLXNA2,PPP3CA,SOD1,SPTBN4	24	0.0021			APOE,CAMKK1,CKB,CKMT1A/CKMT1B,GAP43,KALRN,KLC1,LRRK2,Mt3,NEFH,NEFL,Nefm,PDS5B,PLEC,SOD1,SPTBN4	16
Cell-To-Cell Signaling and Interaction, Nervous System Development and Function	potentiation	potentiation of synapse	3.82e-05	Decreased	-2.913	AKAP5,APOE,B2M,BAIAP2,CAMK2A,CAMK2B,CLSTN1,CRMP1,GABBR1,GUCY1A3,HTT,ITPKA,JPH3,KALRN,LMO4,LRP1,MAPT,NPTX1,Nrgn,PCP4,PINK1,PJA2,PPP1R1A,PPP1R9A,PPP3CA,PRKACA,PRKCB,PTK2,PTN,RAB3A,RASGRF1,ROCK2,S100B,SHANK2,SHANK3,SPTBN2,SRCIN1,SYNJ1,TSC2,UBE3A,VDAC1,VDAC3,WASF1	43	0.00575	Increased	2.475	APOE,B2M,CAMK2A,CAMK2B,CAPNS1,CLSTN1,GRIA2,GUCY1A3,IGF2R,ITPKA,JPH3,KALRN,LMO4,LRP1,Nrgn,PCP4,PINK1,PPP1R9A,PRKCB,PRKCG,PTN,RARB,RASGRF1,S100B,SHANK2,SHANK3,SPTBN2,SRPK2,TSC2	29
Cell Morphology, Nervous System Development and Function, Neurological Disease, Tissue Morphology	abnormal morphology	abnormal morphology of neurites	4.21e-05			AATK,APOE,CKMT1A/CKMT1B,CLSTN1,CNTNAP1,GABBR1,GAP43,GDAP1,GIT1,HNRNPA2B1,HTT,KALRN,LMNA,LRRK2,MAPT,Mt3,MYH10,Nedd4,NEFH,NEFL,Nefm,PAK5,PLEC,PLXNA2,PPP3CA,ROBO2,SOD1,SORBS2,SPTBN4,UBE3A	30	0.000413			APOE,CAMKK1,CCND2,CKB,CKMT1A/CKMT1B,CLSTN1,GAP43,GIT1,HNRNPA2B1,KALRN,LRRK2,Mt3,MYH10,Nedd4,NEFH,NEFL,Nefm,NRN1,PDS5B,PLEC,SOD1,SORBS2,SPTBN4	23
Cellular Development, Cellular Growth and Proliferation, Nervous System Development and Function, Tissue Development	development	development of neurons	4.52e-05	Decreased	-0.955	AGAP2,AKAP5,ANAPC2,ANK3,APBB1,APC,APOE,ATL1,ATXN10,BAIAP2,BICDL1,BRSK1,BSN,CAMK2A,CAMK2B,CCK,CELSR2,CLSTN1,CNP,CNTNAP1,CRMP1,CYFIP1,DAB2IP,DBN1,DLGAP3,DOCK7,DPYSL2,ELMO1,ENC1,FAIM2,FBXO31,FLOT1,GAP43,GAS7,GDI1,GIT1,GSN,HAP1,HIPK2,Hmgb1,HTT,KALRN,KIF3A,LRP1,LRRK2,MAP1S,MAPK8IP1,MAPK8IP3,MAPT,Mbp,METRN,MFN2,MINK1,MTOR,MYH10,MYO5A,MYO5B,NCDN,Nedd4,NEFH,NEFL,Nefm,NSMF,NYAP1,OPA1,PALM,PFN1,PIN1,PIP5K1…	101	0.00217	Increased	0.531	APOE,ARFGEF1,ATL1,BCL11B,BRSK1,BSN,CAMK2A,CAMK2B,CAPNS1,CCK,CKB,CLSTN1,DAB2IP,DBN1,DLGAP3,DOCK7,DPYSL2,ENC1,FABP7,FBXO31,GAP43,GIT1,GSN,Hmgb1,KALRN,KIF3A,LLGL1,LRP1,LRRK2,MAP1S,MAP2,MAPK8IP1,MAPK8IP3,Mbp,METRN,MINK1,MTOR,MYH10,MYO5A,Nedd4,NEFH,NEFL,Nefm,NGFR,NOG,NRN1,NSMF,PALM,PIK3CA,PIN1,PIP5K1C,PPP1R9A,PPP1R9B,PVALB,RASGRF1,RDX,ROR2,RYR2,S100B,SHANK1,SHANK2,SHANK3,SIPA1L1,SIRPA,SLC12A5,SNCB,SOD…	74
Cell Morphology, Cellular Assembly and Organization, Cellular Development, Cellular Function and Maintenance, Cellular Growth and Proliferation, Embryonic Development, Nervous System Development and Function, Organismal Development, Tissue Development, Tissue Morphology	quantity	quantity of neurofilaments	4.6e-05	Decreased	-0.577	MYO5A,NEFH,NEFL,Nefm	4	1.64e-05	Increased	0.577	MYO5A,NEFH,NEFL,Nefm	4
Cellular Assembly and Organization, Cellular Function and Maintenance, Cellular Movement, Nervous System Development and Function	axonal transport	axonal transport	5.2e-05	Decreased	-2.425	HAP1,HTT,MAPK8IP1,MAPT,MFN2,PINK1,RHOT2	7
Cell-To-Cell Signaling and Interaction, Nervous System Development and Function	long-term potentiation	long-term potentiation	6.31e-05	Decreased	-3.148	AKAP5,APOE,B2M,BAIAP2,CAMK2A,CAMK2B,CLSTN1,CRMP1,GABBR1,GUCY1A3,HTT,ITPKA,JPH3,KALRN,LMO4,LRP1,MAPT,NPTX1,Nrgn,PCP4,PINK1,PJA2,PPP1R1A,PPP1R9A,PPP3CA,PRKACA,PTK2,PTN,RAB3A,RASGRF1,ROCK2,S100B,SHANK2,SHANK3,SPTBN2,SRCIN1,SYNJ1,TSC2,UBE3A,VDAC1,VDAC3,WASF1	42	0.00905	Increased	2.767	APOE,B2M,CAMK2A,CAMK2B,CAPNS1,CLSTN1,GRIA2,GUCY1A3,IGF2R,ITPKA,JPH3,KALRN,LMO4,LRP1,Nrgn,PCP4,PINK1,PPP1R9A,PRKCG,PTN,RARB,RASGRF1,S100B,SHANK2,SHANK3,SPTBN2,SRPK2,TSC2	28
Cellular Function and Maintenance	movement	movement of organelle	9.98e-05	Increased	0.349	APC,HTT,MAPT,MYO5A,NEFL,SOD1	6	0.029			MYO5A,NEFL,SOD1	3
Cell Morphology, Nervous System Development and Function, Tissue Morphology	morphology	morphology of neurites	0.000128			AATK,APOE,CKMT1A/CKMT1B,Clip1,CLSTN1,CNP,CNTNAP1,GABBR1,GAP43,GDAP1,GDI1,GIT1,HNRNPA2B1,HTT,KALRN,KIF5A,KLC1,LMNA,LRRK2,MAPT,MFN2,Mt3,MYH10,Nedd4,NEFH,NEFL,Nefm,PAK5,PLEC,PLXNA2,PPP3CA,PVALB,ROBO2,SOD1,SORBS2,SPTBN4,TAC1,UBE3A	38	0.000495			APOE,CAMKK1,CCND2,CKB,CKMT1A/CKMT1B,Clip1,CLSTN1,GAP43,GIT1,HNRNPA2B1,KALRN,KLC1,LRRK2,MAP2,Mt3,MYH10,Nedd4,NEFH,NEFL,Nefm,NGFR,NRN1,PDS5B,PLEC,PVALB,RDX,SOD1,SORBS2,SPTBN4,TAC1	30
Cell Morphology, Cell-To-Cell Signaling and Interaction, Nervous System Development and Function	plasticity	plasticity of neuronal synapse	0.00016			APOE,CAMK2A,JPH3,KALRN,NCDN,NSMF,RASGRF1,S100B	8	0.00022			APOE,CAMK2A,JPH3,KALRN,NSMF,RASGRF1,S100B	7
Cellular Compromise, Cellular Function and Maintenance	endoplasmic reticulum stress response	endoplasmic reticulum stress response	0.000171			HTT,MAPT,SIL1,SOD1,UBE4B	5
Cell Morphology	morphology	morphology of cellular protrusions	0.000197			AATK,APOE,CKMT1A/CKMT1B,Clip1,CLSTN1,CNP,CNTNAP1,GABBR1,GAP43,GDAP1,GDI1,GIT1,HNRNPA2B1,HTT,KALRN,KIF5A,KLC1,LMNA,LRRK2,MAPT,MFN2,Mt3,MYH10,MYO5A,Nedd4,NEFH,NEFL,Nefm,PAK5,PKD1,PLEC,PLXNA2,PPP3CA,PVALB,ROBO2,SOD1,SORBS2,SPTBN4,TAC1,UBE3A	40	0.00104			APOE,CAMKK1,CCND2,CKB,CKMT1A/CKMT1B,Clip1,CLSTN1,GAP43,GIT1,HNRNPA2B1,KALRN,KLC1,LRRK2,MAP2,Mt3,MYH10,MYO5A,Nedd4,NEFH,NEFL,Nefm,NGFR,NRN1,PDS5B,PLEC,PVALB,RDX,SOD1,SORBS2,SPTBN4,TAC1	31
Cell Morphology, Cellular Assembly and Organization, Cellular Development, Cellular Function and Maintenance, Cellular Growth and Proliferation, Nervous System Development and Function, Organismal Development, Tissue Development	axonogenesis	axonogenesis	0.000211	Increased	0.726	ANK3,APC,APOE,ATL1,BAIAP2,BRSK1,CCK,CNP,CYFIP1,DOCK7,DPYSL2,FLOT1,GDI1,KALRN,LRP1,MAPK8IP3,MAPT,Mbp,METRN,MTOR,MYH10,NEFH,NEFL,PIP5K1C,PTK2,RAB3A,ROBO2,RPL4,S100B,SLITRK5,SOD1,SPTBN4,TRIM46,TSC2,UCHL1,ULK2,Wasl	37	0.0018	Decreased	-0.174	APOE,ATL1,BCL11B,BRSK1,CCK,DOCK7,DPYSL2,KALRN,LLGL1,LRP1,MAP2,MAPK8IP3,Mbp,METRN,MTOR,MYH10,NEFH,NEFL,NGFR,NRN1,PIP5K1C,ROR2,S100B,SOD1,SPTBN4,TSC2,ULK2,Wasl	28
Cell Morphology, Cellular Assembly and Organization, Nervous System Development and Function, Tissue Morphology	diameter	diameter of axons	0.000215			KIF5A,MAPT,NEFH,SOD1	4	0.0357			NEFH,SOD1	2
Cell Morphology, Nervous System Development and Function, Tissue Morphology	size	size of axons	0.000215			NEFH,NEFL,Nefm,SOD1	4	7.78e-05			NEFH,NEFL,Nefm,SOD1	4
Cellular Assembly and Organization, Cellular Compromise	formation	formation of cellular inclusion bodies	0.000222	Decreased	-0.29	APOE,HTT,LRRK2,MAPT,NEFH,NEFL,PIN1,SOD1,UBE3A,UCHL1	10	0.0166			APOE,LRRK2,NEFH,NEFL,PIN1,SOD1	6
Cellular Assembly and Organization	transport	transport of vesicles	0.000245	Decreased	-0.985	AATK,DNM1,DPYSL2,HAP1,HTT,MAPK8IP1,MAPT,PIP5K1C,PNKD,RAB3A,SCRIB,SNCB,SPTBN2,SYNJ1,SYT1	15	0.0235			DPYSL2,LIN7A,MAPK8IP1,OTOF,PIP5K1C,PNKD,SCRIB,SNCB,SPTBN2	9
Cell Morphology	size	size of cells	0.000356			AGAP2,AKAP5,AP3D1,B2M,BAIAP2,CAMK2A,CNP,GAP43,HTT,MAPT,MFN2,MYO5A,NEFH,NEFL,Nefm,PVALB,SIPA1L1,SNCB,SOD1	19
Cell Morphology, Nervous System Development and Function, Tissue Morphology	morphology	morphology of neurons	0.000363			AATK,AGAP2,AKAP5,AP3D1,APOE,B2M,BAIAP2,C1QA,CAMK2A,CAMK2B,CKMT1A/CKMT1B,Clip1,CLSTN1,CNP,CNTNAP1,CRMP1,CSTB,DBN1,DNM1,DOCK7,FAIM2,GABBR1,GAD1,GAP43,GDAP1,GDI1,GIT1,HNRNPA2B1,HTT,KALRN,KIF5A,KLC1,LGALS1,LMNA,LRRK2,MAPK8IP1,MAPK8IP3,MAPT,MFN2,Mt3,MTOR,MYCBP2,MYH10,MYO5A,Nedd4,NEFH,NEFL,Nefm,PAK5,PFN1,PINK1,PLEC,PLXNA2,PPP1R9A,PPP3CA,PTK2,PVALB,ROBO2,ROCK2,SHANK1,SHANK2,SHANK3,SIPA1L1,SLC12A7,SLITRK…	75	0.00273			AP3D1,APOE,B2M,BAX,CAMK2A,CAMK2B,CAMKK1,CBLN1,CCND2,CKB,CKMT1A/CKMT1B,Clip1,CLSTN1,DBN1,DOCK7,FAT3,GAP43,GIT1,HNRNPA2B1,KALRN,KLC1,LRRK2,MAP2,MAPK8IP1,MAPK8IP3,Mt3,MTOR,MYCBP2,MYH10,MYO5A,Nedd4,NEFH,NEFL,Nefm,NGFR,NRN1,OTOF,PDS5B,PINK1,PLEC,PPP1R9A,PTPRS,PVALB,RDX,ROR2,SHANK1,SHANK2,SHANK3,SIPA1L1,SLC12A5,SNCB,SOD1,SORBS2,SPTBN4,TAC1,UBE4B,UNC13A	57
Cell Morphology, Cell-To-Cell Signaling and Interaction, Nervous System Development and Function	plasticity	plasticity of synapse	0.000411	Decreased	-1.664	AKAP5,APOE,BAIAP2,CAMK2A,CAMK2B,DBN1,DLGAP3,HTT,ITPKA,JPH3,KALRN,MAPT,NCDN,NSMF,PCP4,PIP5K1C,PPP3CB,RASGRF1,S100B,SHANK3,SIPA1L1,SRCIN1,YWHAG	23	0.000227	Increased	1.026	APOE,CAMK2A,CAMK2B,DBN1,DLGAP3,GRIA2,ITPKA,JPH3,KALRN,MME,NGFR,NSMF,PCP4,PIP5K1C,PPP3CB,RASGRF1,S100B,SHANK3,SIPA1L1,YWHAG	20
Energy Production, Nucleic Acid Metabolism, Small Molecule Biochemistry	synthesis	synthesis of ATP	0.00056			HTT,MFN2,SOD1	3
Cellular Assembly and Organization	distribution	distribution of mitochondria	0.000603			MAPT,MFN2,OPA1,PINK1	4
Cellular Compromise, Cellular Function and Maintenance	endoplasmic reticulum stress response	endoplasmic reticulum stress response of neurons	0.000603			HTT,SIL1,SOD1,UBE4B	4
Cellular Function and Maintenance	movement	movement of mitochondria	0.000603			HTT,MAPT,NEFL,SOD1	4
Cell Morphology, Nervous System Development and Function, Tissue Morphology	size	size of neurons	0.00065			AGAP2,AKAP5,AP3D1,B2M,BAIAP2,CAMK2A,GAP43,HTT,MAPT,MYO5A,NEFH,NEFL,Nefm,PVALB,SIPA1L1,SNCB,SOD1	17	0.000359			AP3D1,B2M,BAX,CAMK2A,GAP43,MYO5A,NEFH,NEFL,Nefm,NGFR,PVALB,RDX,SIPA1L1,SNCB,SOD1	15
Cell Morphology, Cellular Assembly and Organization, Cellular Development, Cellular Function and Maintenance, Cellular Growth and Proliferation, Nervous System Development and Function, Organismal Development, Tissue Development	polarization	polarization of neurons	0.00067			APC,DPYSL2,HTT,MAPK8IP1,MAPT	5	0.0221			DPYSL2,MAP2,MAPK8IP1	3
Cellular Assembly and Organization, Tissue Development	formation	formation of filaments	0.00067			LRP1,MAPT,NEFH,NEFL,PTGDS	5	0.0221			LRP1,NEFH,NEFL	3
Cell Morphology, Cellular Assembly and Organization	morphology	morphology of mitochondria	0.00081			HTT,MFN2,NDUFS4,OPA1,PINK1,SOD1	6
Cell Morphology, Cellular Assembly and Organization, Cellular Development, Cellular Function and Maintenance, Cellular Growth and Proliferation, Embryonic Development, Nervous System Development and Function, Organismal Development, Tissue Development	branching	branching of neurites	0.00119	Decreased	-1.803	AGAP2,AKAP5,APOE,BSN,CAMK2A,CAMK2B,CLSTN1,CRMP1,DAB2IP,DBN1,DPYSL2,ELMO1,GAP43,GIT1,HTT,KALRN,KIF3A,MAPK8IP3,MAPT,MFN2,MTOR,MYO5A,MYO5B,Nedd4,NEFH,NEFL,Nefm,OPA1,PFN1,PPP1R9A,PVALB,ROBO2,ROCK2,RYR2,S100B,SHANK2,SHANK3,SIPA1L1,SOD1,SPTBN2,SRCIN1,TSC2,UBE3A,ULK2	44	0.00129	Increased	0.984	APOE,BSN,CAMK2A,CAMK2B,CAPNS1,CLSTN1,DAB2IP,DBN1,DPYSL2,GAP43,GIT1,KALRN,KIF3A,MAPK8IP3,MTOR,MYO5A,Nedd4,NEFH,NEFL,Nefm,NGFR,NRN1,PIK3CA,PPP1R9A,PVALB,ROR2,RYR2,S100B,SHANK2,SHANK3,SIPA1L1,SLC12A5,SOD1,SPTBN2,TSC2,ULK2	36
Cellular Assembly and Organization	transport	transport of mitochondria	0.00121	Decreased	-1.504	MAPT,MFN2,NEFL,PINK1,RHOT2,SOD1	6
Cellular Assembly and Organization, Nervous System Development and Function	accumulation	accumulation of neurofilaments	0.00131			MAPT,NEFH,NEFL,SOD1	4	0.00744			NEFH,NEFL,SOD1	3
Cellular Assembly and Organization, Cellular Compromise, Nervous System Development and Function	retraction	retraction of neurites	0.00145	Decreased	-1.246	GNA12,HTT,KALRN,LRRK2,MYH10,PINK1,PITPNM1,ROCK2	8
Cellular Assembly and Organization, Cellular Function and Maintenance, Nervous System Development and Function, Tissue Morphology	quantity	quantity of axons	0.00147	Decreased	1.153	APOE,HAP1,HTT,KIF5A,MAPT,NEFH,NEFL,SOD1,UBE4B,XPC	10	0.0439			APOE,BAX,NEFH,NEFL,SOD1,UBE4B	6
Cell Morphology, Cellular Assembly and Organization, Cellular Development, Cellular Function and Maintenance, Cellular Growth and Proliferation, Embryonic Development, Nervous System Development and Function, Organismal Development, Tissue Development, Tissue Morphology	morphology	morphology of dendritic spines	0.0016			AKAP5,APOE,CAMK2A,CLSTN1,DBN1,GIT1,HTT,MAPT,PFN1,PPP1R9A,PVALB,ROCK2,SHANK2,SHANK3,SIPA1L1,SRCIN1	16	0.0203			APOE,CAMK2A,CLSTN1,DBN1,GIT1,PPP1R9A,PVALB,SHANK2,SHANK3,SIPA1L1,SLC12A5	11
Cell Morphology	morphology	morphology of cells	0.00181			AATK,ABR,AGAP2,AKAP5,AP3D1,APOE,B2M,BAIAP2,C1QA,CAMK2A,CAMK2B,CKMT1A/CKMT1B,Clip1,CLSTN1,CNP,CNTNAP1,CRMP1,CSTB,DBN1,DNM1,DOCK7,FAIM2,GABBR1,GAD1,GAP43,GDAP1,GDI1,GIT1,HNRNPA2B1,HTT,KALRN,KIF5A,KLC1,LGALS1,LMNA,LRRK2,MAPK8IP1,MAPK8IP3,MAPT,MFN2,Mt3,MTOR,MYCBP2,MYH10,MYO5A,NDUFS4,Nedd4,NEFH,NEFL,Nefm,OPA1,PAK5,PFN1,PINK1,PKD1,PLEC,PLXNA2,PPP1R9A,PPP3CA,PTK2,PVALB,ROBO2,ROCK2,S100B,SHANK1,SHANK2,SH…	81	0.0162			ABR,AP3D1,APOE,B2M,BAX,CAMK2A,CAMK2B,CAMKK1,CBLN1,CCND2,CKB,CKMT1A/CKMT1B,Clip1,CLSTN1,DBN1,DOCK7,FAT3,GAP43,GIT1,HNRNPA2B1,KALRN,KLC1,LRRK2,MAP2,MAPK8IP1,MAPK8IP3,Mt3,MTOR,MYCBP2,MYH10,MYO5A,NDUFS4,Nedd4,NEFH,NEFL,Nefm,NGFR,NRN1,OTOF,PDS5B,PINK1,PLEC,PPP1R9A,PTPRS,PVALB,RDX,ROR2,S100B,SHANK1,SHANK2,SHANK3,SIPA1L1,SLC12A5,SNCB,SOD1,SORBS2,SPTBN4,TAC1,UBE4B,UNC13A	60
Cell Morphology, Nervous System Development and Function, Neurological Disease, Tissue Morphology	abnormal morphology	abnormal morphology of axons	0.00205			AATK,CKMT1A/CKMT1B,CNTNAP1,GABBR1,GAP43,LMNA,LRRK2,MAPT,Mt3,NEFH,NEFL,Nefm,PLEC,PLXNA2,PPP3CA,SPTBN4	16	0.00973			CAMKK1,CKB,CKMT1A/CKMT1B,GAP43,LRRK2,Mt3,NEFH,NEFL,Nefm,PDS5B,PLEC,SPTBN4	12
Cell Morphology, Cellular Development, Embryonic Development, Nervous System Development and Function, Tissue Development	patterning	patterning of dendrites	0.0021			CELSR2,CRMP1,DPYSL2	3	0.0223			CELSR3,DPYSL2	2
Cellular Assembly and Organization, Cellular Function and Maintenance, Cellular Movement, Nervous System Development and Function	axonal transport	axonal transport of vesicles	0.0021			HAP1,HTT,MAPK8IP1	3
Cell Morphology, Cellular Assembly and Organization, Cellular Development, Cellular Function and Maintenance, Cellular Growth and Proliferation, Embryonic Development, Nervous System Development and Function, Organismal Development, Tissue Development	branching	dendritic growth/branching	0.00212	Decreased	-2.281	AGAP2,AKAP5,APOE,BSN,CAMK2A,CLSTN1,CRMP1,DAB2IP,DBN1,ELMO1,GIT1,HTT,KIF3A,MAPT,MFN2,MTOR,MYO5A,MYO5B,Nedd4,NEFH,NEFL,Nefm,OPA1,PFN1,PPP1R9A,PVALB,ROBO2,ROCK2,RYR2,SHANK2,SHANK3,SIPA1L1,SPTBN2,SRCIN1,TSC2,UBE3A	36	0.0111	Increased	1.696	APOE,BSN,CAMK2A,CAPNS1,CLSTN1,DAB2IP,DBN1,GIT1,KIF3A,MTOR,MYO5A,Nedd4,NEFH,NEFL,Nefm,NGFR,NRN1,PIK3CA,PPP1R9A,PVALB,RYR2,SHANK2,SHANK3,SIPA1L1,SLC12A5,SPTBN2,TSC2	27
Cell Morphology, Cellular Assembly and Organization, Cellular Development, Cellular Function and Maintenance, Cellular Growth and Proliferation, Embryonic Development, Nervous System Development and Function, Organismal Development, Tissue Development, Tissue Morphology	size	size of dendritic spines	0.00246			AKAP5,CAMK2A,PVALB,SIPA1L1	4	0.0113			CAMK2A,PVALB,SIPA1L1	3
Cellular Compromise	degradation	degradation of mitochondria	0.00246	Increased	1.091	HSPA9,HTT,MFN2,PINK1	4
Cell Morphology, Nervous System Development and Function, Neurological Disease, Tissue Morphology	abnormal morphology	abnormal morphology of neurons	0.00265			AATK,APOE,B2M,C1QA,CAMK2A,CKMT1A/CKMT1B,CLSTN1,CNTNAP1,CRMP1,CSTB,DBN1,DNM1,GABBR1,GAD1,GAP43,GDAP1,GIT1,HNRNPA2B1,HTT,KALRN,KIF5A,LGALS1,LMNA,LRRK2,MAPK8IP1,MAPK8IP3,MAPT,Mt3,MYCBP2,MYH10,Nedd4,NEFH,NEFL,Nefm,PAK5,PINK1,PLEC,PLXNA2,PPP3CA,PVALB,ROBO2,ROCK2,SHANK1,SHANK2,SHANK3,SLC12A7,SOD1,SORBS2,SPTBN4,SRCIN1,UBE3A,UBE4B,UNC13A,XPC	54	0.00144			APOE,B2M,BAX,CAMK2A,CAMKK1,CBLN1,CCND2,CKB,CKMT1A/CKMT1B,CLSTN1,DBN1,FAT3,GAP43,GIT1,HNRNPA2B1,KALRN,LRRK2,MAP2,MAPK8IP1,MAPK8IP3,Mt3,MYCBP2,MYH10,Nedd4,NEFH,NEFL,Nefm,NGFR,NRN1,OTOF,PDS5B,PINK1,PLEC,PTPRS,PVALB,ROR2,SHANK1,SHANK2,SHANK3,SLC12A5,SOD1,SORBS2,SPTBN4,UBE4B,UNC13A	45
Cell Morphology, Cellular Assembly and Organization, Cellular Development, Cellular Function and Maintenance, Cellular Growth and Proliferation, Embryonic Development, Nervous System Development and Function, Organismal Development, Tissue Development, Tissue Morphology	length	length of dendritic spines	0.0033			APOE,DBN1,HTT,MAPT,PPP1R9A,SIPA1L1	6	0.0295			APOE,DBN1,PPP1R9A,SIPA1L1	4
Cell-To-Cell Signaling and Interaction, Nervous System Development and Function	long term depression	long term depression of synapse	0.00379	Decreased	-1.63	AKAP5,B2M,CAMK2A,CAMK2B,HTT,MTOR,MYO5A,PINK1,PPP1R9B,SHANK2,SHANK3,SRCIN1,WASF1	13	0.00126	Increased	1.706	B2M,CAMK2A,CAMK2B,CBLN1,GRIA2,MTOR,MYO5A,NGFR,PINK1,PPP1R9B,SHANK2,SHANK3	12
Cellular Assembly and Organization	quantity	quantity of vesicles	0.00403	Increased	0.739	B2M,BSN,CAMK2A,CHM,DNM1,HIPK2,MYO5A,Nedd4,SOD1,SYNJ1,UNC13A	11	0.0202			B2M,BSN,CAMK2A,MYO5A,Nedd4,PCDH17,SOD1,UNC13A	8
Cellular Assembly and Organization, Cellular Function and Maintenance	quantity	quantity of plasma membrane projections	0.00493			CNP,MAPT,MYO5A	3
Cell Morphology, Nervous System Development and Function, Neurological Disease, Tissue Morphology	abnormal morphology	abnormal morphology of dendrites	0.00538			APOE,CLSTN1,GIT1,KALRN,LRRK2,MAPT,MYH10,Nedd4,PLXNA2,SORBS2,UBE3A	11	0.000697			APOE,CAMKK1,CCND2,CLSTN1,GIT1,KALRN,LRRK2,MYH10,Nedd4,NRN1,SORBS2	11
Cellular Assembly and Organization	quantity	quantity of filaments	0.00545	Decreased	-0.896	APOE,MAPT,MYO5A,NEFH,NEFL,Nefm,STMN2,SYNJ1	8	0.00492	Decreased	-0.6	APOE,MME,MYO5A,NEFH,NEFL,Nefm,STMN2	7
Cell Morphology, Nervous System Development and Function, Neurological Disease, Tissue Morphology	abnormal morphology	abnormal morphology of mossy fibers	0.00563			CKMT1A/CKMT1B,LRRK2,Mt3,PLXNA2,PPP3CA	5	0.0127			CKB,CKMT1A/CKMT1B,LRRK2,Mt3	4
Cell Morphology, Cellular Assembly and Organization, Cellular Development, Cellular Function and Maintenance, Cellular Growth and Proliferation, Embryonic Development, Nervous System Development and Function, Neurological Disease, Organismal Development, Tissue Development, Tissue Morphology	abnormal morphology	abnormal morphology of dendritic spines	0.00645			CLSTN1,DBN1,GIT1,ROCK2,SHANK2,SHANK3,SRCIN1	7	0.0074			CLSTN1,DBN1,GIT1,SHANK2,SHANK3,SLC12A5	6
Cellular Assembly and Organization	formation	formation of cytoskeleton	0.00645			LRP1,MAPT,NEFH,PTGDS	4
Cellular Assembly and Organization, Cellular Function and Maintenance, Cellular Movement, Nervous System Development and Function	axonal transport	axonal transport of mitochondria	0.00645			MAPT,MFN2,PINK1,RHOT2	4
Cellular Assembly and Organization, Cellular Function and Maintenance, Nervous System Development and Function, Tissue Development	organization	organization of neurofilaments	0.00645			NEFH,NEFL,Nefm,SOD1	4	0.00252			NEFH,NEFL,Nefm,SOD1	4
Cellular Assembly and Organization, Nervous System Development and Function, Tissue Morphology	quantity	quantity of dendritic spines	0.00657	Decreased	-0.73	AKAP5,CLSTN1,GIT1,HTT,MAPT,PTK2,SRCIN1,WASF1	8
Cell-To-Cell Signaling and Interaction, Nervous System Development and Function	neurotransmission	neurotransmission of corticostriatal neurons	0.0068			HTT,SLITRK5	2
Cell-To-Cell Signaling and Interaction, Nervous System Development and Function	synaptic transmission	synaptic transmission of medium spiny neurons	0.0068			DLGAP3,HTT	2
Cellular Assembly and Organization	aggregation	aggregation of filaments	0.0068			APOE,NEFL	2	0.00406			APOE,NEFL	2
Cellular Assembly and Organization, Cellular Compromise	formation	formation of neurofilament inclusion	0.0068			NEFH,SOD1	2	0.00406			NEFH,SOD1	2
Cellular Assembly and Organization, Cellular Compromise, Cellular Function and Maintenance	disruption	disruption of microtubules	0.0068			APOE,MAPT	2
Cellular Assembly and Organization, Cellular Function and Maintenance	dissociation	dissociation of microtubules	0.0068			HTT,NEFL	2
Cellular Assembly and Organization, Cellular Function and Maintenance, Cellular Movement, Nervous System Development and Function	axonal transport	axonal transport of autophagosomes	0.0068			HAP1,HTT	2
Cellular Assembly and Organization, Cellular Function and Maintenance, Cellular Movement, Nervous System Development and Function	fast axonal transport	fast axonal transport	0.0068			HTT,MAPT	2
Cellular Assembly and Organization, Nervous System Development and Function	assembly	assembly of axon initial segments	0.0068			SPTAN1,SPTBN1	2	0.00406			SPTAN1,SPTBN1	2
Cellular Compromise	degeneration	degeneration of mitochondria	0.0068			HTT,MAPT	2
Cellular Compromise, Cellular Function and Maintenance, Organismal Injury and Abnormalities	endoplasmic reticulum stress response	endoplasmic reticulum stress response of Purkinje cells	0.0068			SIL1,UBE4B	2
Cellular Movement, Hematological System Development and Function, Immune Cell Trafficking, Inflammatory Response, Nervous System Development and Function	migration	migration of microglia	0.0068			PARP1,PTGDS	2
Cellular Assembly and Organization, Cellular Movement, Nervous System Development and Function	transport	transport of synaptic vesicles	0.00708	Decreased	-0.314	DNM1,DPYSL2,HTT,PIP5K1C,PNKD,RAB3A,SCRIB,SNCB,SPTBN2,SYNJ1,SYT1	11	0.0298			DPYSL2,LIN7A,OTOF,PIP5K1C,PNKD,SCRIB,SNCB,SPTBN2	8
Cell-To-Cell Signaling and Interaction	synaptic depression	synaptic depression	0.00728	Decreased	-0.205	AKAP5,AP2A1,B2M,CAMK2A,CAMK2B,DLGAP3,HTT,MTOR,MYO5A,PARK7,PEBP1,PINK1,PIP5K1C,PPP1R9B,RAB3A,SHANK2,SHANK3,SRCIN1,SYNJ1,UNC13A,WASF1	21	0.000798	Increased	0.193	ADCY5,B2M,BAX,CAMK2A,CAMK2B,CBLN1,DLGAP3,GRIA2,HOMER1,MTOR,MYO5A,NGFR,PARK7,PINK1,PIP5K1C,PPP1R9B,PRKCG,SHANK2,SHANK3,UNC13A	20
Cell Signaling, Molecular Transport, Small Molecule Biochemistry, Vitamin and Mineral Metabolism	release	release of Ca2+	0.00764			HTT,LMO4,MAPT,MYO5A,SOD1	5
Cellular Assembly and Organization	quantity	quantity of cellular inclusion bodies	0.00764			HTT,LRRK2,MAPT,SIL1,SOD1	5
Cell Morphology, Nervous System Development and Function, Tissue Morphology	morphology	morphology of dendrites	0.00882			APOE,Clip1,CLSTN1,GIT1,HTT,KALRN,LRRK2,MAPT,MYH10,Nedd4,PLXNA2,PVALB,SORBS2,TAC1,UBE3A	15	0.000237			APOE,CAMKK1,CCND2,Clip1,CLSTN1,GIT1,KALRN,LRRK2,MAP2,MYH10,Nedd4,NGFR,NRN1,PVALB,SORBS2,TAC1	16
Cell Death and Survival, Nervous System Development and Function	survival	survival of cerebellar granule cell	0.00925			CAMK2B,FOXG1,PARK7	3
Cell-To-Cell Signaling and Interaction, Cellular Assembly and Organization, Nervous System Development and Function	fusion	fusion of synaptic vesicles	0.00925			BSN,EEA1,RAB3A	3
Cellular Assembly and Organization, Cellular Development, Nervous System Development and Function, Tissue Development	maturation	maturation of synaptic vesicles	0.00925			RAB3A,STXBP1,UNC13A	3
Cellular Assembly and Organization, Cellular Function and Maintenance	quantity	quantity of cellular protrusions	0.0119	Increased	0.52	AKAP5,APOE,CLSTN1,CNP,GSN,HAP1,HTT,KALRN,KIF5A,MAPT,MYO5A,NEFH,NEFL,SOD1,UBE4B,XPC	16	0.0159	Decreased	-0.644	APOE,BAX,CLSTN1,GSN,KALRN,MYO5A,NEFH,NEFL,NGFR,NRN1,RDX,SOD1,UBE4B	13
Cell Morphology, Cellular Assembly and Organization	accumulation	accumulation of vesicles	0.0133			APOE,HTT,KLC1,MAPT	4	0.0368			APOE,KLC1,PCDH17	3
Cell-To-Cell Signaling and Interaction, Cellular Function and Maintenance, Nervous System Development and Function	paired-pulse facilitation	paired-pulse facilitation of synapse	0.0134	Decreased	-1.226	BAIAP2,CAMK2A,GDI1,PTN,RAB3A,RAB3C,ROCK2,VDAC1,VDAC3	9
Cellular Development, Nervous System Development and Function, Tissue Development	maturation	maturation of neurons	0.0134			CAMK2A,HIPK2,MAPT,PALM,PPP3CA,RAB3A,SHANK1,STXBP1,UNC13A	9
Cellular Function and Maintenance	paired-pulse facilitation	paired-pulse facilitation	0.0134	Decreased	-0.787	BAIAP2,CAMK2A,GDI1,HTT,PTN,RAB3A,RAB3C,ROCK2,VDAC1,VDAC3	10
Cell-To-Cell Signaling and Interaction, Nervous System Development and Function	long-term potentiation	long-term potentiation of brain	0.0145	Decreased	-2.36	APOE,B2M,CAMK2A,GUCY1A3,HTT,JPH3,LMO4,LRP1,MAPT,Nrgn,PINK1,PJA2,PPP3CA,PRKACA,PTK2,RAB3A,RASGRF1,SPTBN2,SYNJ1,UBE3A	20
Cellular Compromise	fragmentation	fragmentation of mitochondria	0.0152			HSPA9,MFN2,PINK1	3
Molecular Transport, Protein Trafficking	transport	transport of protein	0.0152			HTT,MAPT,SOD1	3
Cell Morphology, Organismal Injury and Abnormalities	swelling	swelling of cells	0.0165			CNP,HTT,KLC1,MAPT,MFN2	5
Cellular Function and Maintenance, Molecular Transport	exocytosis	exocytosis	0.0172			PIP5K1C,PNKD,RAB3A,SPTBN2,STXBP1,SYNJ1,SYT1,UNC13A	8	0.0439			OTOF,PIP5K1C,PNKD,SPTBN2,STXBP1,UNC13A	6
Cell Morphology	abnormal morphology	abnormal morphology of cells	0.0184			AATK,ABR,APOE,B2M,C1QA,CAMK2A,CKMT1A/CKMT1B,CLSTN1,CNTNAP1,CRMP1,CSTB,DBN1,DNM1,GABBR1,GAD1,GAP43,GDAP1,GIT1,HNRNPA2B1,HTT,KALRN,KIF5A,LGALS1,LMNA,LRRK2,MAPK8IP1,MAPK8IP3,MAPT,Mt3,MYCBP2,MYH10,Nedd4,NEFH,NEFL,Nefm,PAK5,PINK1,PLEC,PLXNA2,PPP3CA,PVALB,ROBO2,ROCK2,SHANK1,SHANK2,SHANK3,SLC12A7,SOD1,SORBS2,SPTBN4,SRCIN1,UBE3A,UBE4B,UNC13A,XPC	55	0.00832			ABR,APOE,B2M,BAX,CAMK2A,CAMKK1,CBLN1,CCND2,CKB,CKMT1A/CKMT1B,CLSTN1,DBN1,FAT3,GAP43,GIT1,HNRNPA2B1,KALRN,LRRK2,MAP2,MAPK8IP1,MAPK8IP3,Mt3,MYCBP2,MYH10,Nedd4,NEFH,NEFL,Nefm,NGFR,NRN1,OTOF,PDS5B,PINK1,PLEC,PTPRS,PVALB,ROR2,SHANK1,SHANK2,SHANK3,SLC12A5,SOD1,SORBS2,SPTBN4,UBE4B,UNC13A	46
Cell Death and Survival, Cellular Compromise, Neurological Disease, Tissue Morphology	neurodegeneration	neurodegeneration of projection neurons	0.0193			HTT,SOD1	2
Cell Morphology	polarity	polarity of hippocampal neurons	0.0193			ANK3,KIF3A	2
Cell Morphology, Cellular Assembly and Organization, Nervous System Development and Function, Tissue Morphology	size	size of postsynaptic density	0.0193			BAIAP2,MAPT	2
Cell-To-Cell Signaling and Interaction, Cellular Assembly and Organization, Cellular Function and Maintenance	formation	formation of focal adhesions	0.0193			LRP1,PTGDS	2
Cell-To-Cell Signaling and Interaction, Nervous System Development and Function	activation	activation of interneurons	0.0193			CCK,SOD1	2	0.0117			CCK,SOD1	2
Cell-To-Cell Signaling and Interaction, Nervous System Development and Function	long term depression	long term depression of perirhinal cortex	0.0193			HTT,SRCIN1	2
Cellular Assembly and Organization	fusion	fusion of mitochondria	0.0193			MFN2,OPA1	2
Cellular Assembly and Organization, Cellular Function and Maintenance, Tissue Development	formation	formation of actin filaments	0.0193			LRP1,PTGDS	2
Cellular Compromise, Neurological Disease, Organismal Injury and Abnormalities	atrophy	atrophy of axons	0.0193			NEFH,Nefm	2	0.0117			NEFH,Nefm	2
Cellular Development, Cellular Growth and Proliferation, Nervous System Development and Function, Tissue Development	growth	growth of motor axons	0.0193			Nefm,PTN	2	0.0117			Nefm,PTN	2
Cell Morphology, Cellular Assembly and Organization, Cellular Development, Cellular Function and Maintenance, Cellular Growth and Proliferation, Embryonic Development, Nervous System Development and Function, Organismal Development, Tissue Development, Tissue Morphology	density	density of dendritic spines	0.0196	Decreased	-2.045	APOE,CRMP1,HTT,MAPT,MFN2,Nedd4,OPA1,PFN1,PPP1R9A,PVALB,RYR2,SPTBN2,TSC2	13
Cell-To-Cell Signaling and Interaction, Nervous System Development and Function	long-term potentiation	long-term potentiation of collateral synapses	0.0206	Decreased	-0.762	AKAP5,BAIAP2,CAMK2B,CLSTN1,MAPT	5
Cell-To-Cell Signaling and Interaction, Nervous System Development and Function	long term depression	long term depression	0.0208	Decreased	-1.262	AKAP5,AP2A1,B2M,CAMK2A,CAMK2B,HTT,MTOR,MYO5A,PARK7,PEBP1,PINK1,PIP5K1C,PPP1R9B,SHANK2,SHANK3,SRCIN1,WASF1	17	0.000633	Increased	0.686	ADCY5,B2M,BAX,CAMK2A,CAMK2B,CBLN1,GRIA2,HOMER1,MTOR,MYO5A,NGFR,PARK7,PINK1,PIP5K1C,PPP1R9B,PRKCG,SHANK2,SHANK3	18
Cellular Development, Cellular Growth and Proliferation, Nervous System Development and Function, Tissue Development	outgrowth	outgrowth of axons	0.0214	Increased	0.822	AATK,APBB1,BRSK1,DPYSL2,EEA1,GAP43,GDAP1,LRRK2,MAPT,NEFH,NGEF,NSMF,PJA2,PTN,VIM	15	0.00564	Decreased	-0.218	BAX,BRSK1,DPYSL2,EEA1,ENPP2,GAP43,LRRK2,NEFH,NGFR,NRN1,NSMF,PIK3CA,PTN,PTPRS	14
Cellular Function and Maintenance	endocytosis	endocytosis	0.0226	Increased	1.279	DLGAP3,DNM1,PIP5K1C,SCRIB,SNCB,SYNJ1,SYT1,VPS18	8
Cell Morphology, Cellular Compromise, Nervous System Development and Function, Neurological Disease, Organismal Injury and Abnormalities, Tissue Morphology	swelling	swelling of axons	0.0229			CNP,KLC1,MFN2	3
Cellular Assembly and Organization, Cellular Function and Maintenance	quantity	quantity of microtubules	0.0229			MAPT,Nefm,STMN2	3
Cell Morphology, Organismal Injury and Abnormalities	swelling	swelling of neurons	0.0236			CNP,HTT,KLC1,MFN2	4
Cellular Assembly and Organization, Neurological Disease, Organismal Development, Tissue Development	formation	formation of amyloid fibrils	0.0236			APOE,MAPT,SOD1,STMN2	4
Cellular Compromise	dysfunction	dysfunction of mitochondria	0.0236	Increased	1.512	COX4I1,HSPA9,HTT,MFN2	4
Cellular Development, Cellular Growth and Proliferation, Nervous System Development and Function, Tissue Development	growth	growth of axons	0.029	Increased	0.818	AATK,APBB1,BRSK1,DPYSL2,EEA1,GAP43,GDAP1,LRRK2,MAPT,MTOR,Nedd4,NEFH,Nefm,NGEF,NSMF,PJA2,PPP3CB,PTN,ROCK2,TSC2,UBE4B,VIM	22	0.00749	Decreased	-0.069	BAX,BRSK1,DPYSL2,EEA1,ENPP2,GAP43,LRRK2,MTOR,Nedd4,NEFH,Nefm,NGFR,NRN1,NSMF,PIK3CA,PPP3CB,PTN,PTPRS,TSC2,UBE4B	20
Cell-To-Cell Signaling and Interaction, Nervous System Development and Function	synaptic transmission	synaptic transmission	0.0293	Increased	0.234	APOE,CAMK2A,CLSTN1,DLGAP3,DPYSL2,GAD1,HTT,MAPT,Nedd4,Nrgn,PNKD,PRKCB,RAB3A,SHANK3,SNCB,STXBP1,UCHL1,VDAC1,VDAC3	19	0.00214	Increased	0.058	APOE,CAMK2A,CLSTN1,CRH,DLGAP3,DPYSL2,GRIA2,HOMER1,Nedd4,NGFR,NR3C1,Nrgn,PCDH17,PNKD,PRKCB,PTPRS,SHANK3,SNCB,STXBP1	19
Cellular Development	maturation	maturation of cells	0.0294			CAMK2A,CAMK2B,HIPK2,MAPT,PALM,PPP3CA,RAB3A,SHANK1,STXBP1,UNC13A	10
Nucleic Acid Metabolism, Small Molecule Biochemistry	synthesis	synthesis of nucleotide	0.0305			HTT,MFN2,RAMP1,SOD1,TAC1	5
Cell-To-Cell Signaling and Interaction, Nervous System Development and Function	synaptic transmission	synaptic transmission of nervous tissue	0.0314	Decreased	-0.29	APOE,CLSTN1,DLGAP3,GAD1,HTT,MAPT,Nedd4,PNKD,RAB3A,SHANK3,SNCB,STXBP1,UCHL1,VDAC1,VDAC3	15	0.0197	Increased	1.082	APOE,CLSTN1,DLGAP3,GRIA2,HOMER1,Nedd4,NR3C1,PCDH17,PNKD,PTPRS,SHANK3,SNCB,STXBP1	13
Cell Cycle, Gene Expression	binding	binding of DNA	0.0322			HTT,MAPT,SOD1	3
Cell Death and Survival, Cellular Compromise, Neurological Disease, Organismal Injury and Abnormalities, Tissue Morphology	neurodegeneration	neurodegeneration of cortical neurons	0.0322			HTT,LRRK2,SOD1	3
Cellular Assembly and Organization, Cellular Function and Maintenance	function	function of mitochondria	0.0322			COX8A,HTT,MFN2	3
Cellular Assembly and Organization, Cellular Function and Maintenance	quantity	quantity of filopodia	0.0322			AKAP5,GSN,KALRN	3	0.0162			GSN,KALRN,NGFR	3
Cell Morphology, Cellular Assembly and Organization, Nervous System Development and Function	elongation	elongation of axons	0.0332	Increased	1.664	AATK,DPYSL2,MAPT,PFN1,STMN2,ULK2	6
Carbohydrate Metabolism, Small Molecule Biochemistry	metabolism	metabolism of D-glucose	0.0364			APOE,HTT	2
Cell Cycle, Gene Expression	binding	binding of protein binding site	0.0364			HTT,SOD1	2
Cell Death and Survival, Cellular Compromise, Nervous System Development and Function	cytotoxicity	cytotoxicity of neurons	0.0364			HTT,NDUFS4	2
Cell Morphology, Cellular Assembly and Organization	size	size of mitochondria	0.0364			HTT,MFN2	2
Cell Morphology, Cellular Compromise	swelling	swelling of mitochondria	0.0364			HTT,SOD1	2
Cell Morphology, Nervous System Development and Function, Tissue Morphology	morphology	morphology of nerve ending	0.0364			B2M,BAIAP2,C1QA,MAPT,MYO5A	5
Cellular Assembly and Organization	formation	formation of cytoplasmic aggregates	0.0364			HTT,SOD1	2
Cellular Assembly and Organization, Cellular Compromise, Nervous System Development and Function	formation	formation of intermediate filament inclusions	0.0364			NEFL,SOD1	2	0.0223			NEFL,SOD1	2
Cellular Assembly and Organization, Cellular Function and Maintenance, Cellular Movement, Nervous System Development and Function	endocytosis	endocytosis of synaptic vesicles	0.0364			DNM1,PIP5K1C,SCRIB,SNCB,SYNJ1	5
Cellular Compromise	permeability transition	permeability transition of mitochondria	0.0364			COX4I1,HTT	2
Cellular Compromise, Neurological Disease, Organismal Injury and Abnormalities	dysfunction	dysfunction of neurons	0.0364			HTT,NEFH	2
Cell Death and Survival, Neurological Disease, Organismal Injury and Abnormalities	cell death	cell death of pyramidal neurons	0.0376			APOE,MTOR,PPP1R9B,SOD1	4	0.000303	Increased	1.372	APOE,GRIA2,HDAC4,MTOR,PPP1R9B,SOD1	6
Cell Morphology, Cellular Assembly and Organization, Cellular Development, Cellular Function and Maintenance, Cellular Growth and Proliferation, Embryonic Development, Nervous System Development and Function, Organismal Development, Tissue Development, Tissue Morphology	loss	loss of dendritic spines	0.0376			APOE,HTT,MAPT,PFN1	4
Cell Morphology, Cellular Assembly and Organization, Nervous System Development and Function, Tissue Morphology	size	size of nerve ending	0.0376			B2M,BAIAP2,MAPT,MYO5A	4
Cellular Assembly and Organization, Cellular Function and Maintenance, Cellular Movement, Molecular Transport, Nervous System Development and Function	exocytosis	exocytosis of synaptic vesicles	0.043			PIP5K1C,PNKD,RAB3A,SPTBN2,SYT1	5
Cellular Assembly and Organization, Neurological Disease, Organismal Development, Tissue Development	formation	formation of amyloid-beta plaques	0.0433			MAPT,SOD1,STMN2	3
Cell Death and Survival, Cellular Compromise, Neurological Disease, Tissue Morphology	neurodegeneration	neurodegeneration of sensory neurons	0.0484	Decreased	-0.119	APOE,HTT,KIF5A,PIK3C3,SLC12A7,SOD1,UCHL1	7
Cell Morphology, Cell-To-Cell Signaling and Interaction, Cellular Assembly and Organization	morphology	morphology of intercellular junctions	0.0492			APOE,B2M,CNTNAP1,GDAP1,KALRN,LGALS1,MYCBP2,Nedd4,ROCK2,SHANK3,SNCB,UNC13A	12
Cell Morphology	shape change	shape change of neurites						0.00122	Increased	0.771	APOE,BCL11B,BSN,CAMK2A,CAMK2B,CAPNS1,CLSTN1,DAB2IP,DBN1,DPYSL2,GAP43,GIT1,KALRN,KIF3A,MAPK8IP3,MTOR,MYO5A,Nedd4,NEFH,NEFL,Nefm,NGFR,NRN1,PIK3CA,PPP1R9A,PVALB,ROR2,RYR2,S100B,SHANK2,SHANK3,SIPA1L1,SLC12A5,SOD1,SPTBN2,TSC2,ULK2	37
Cellular Assembly and Organization, Cellular Function and Maintenance	organization	organization of filaments						0.00128			NEFH,NEFL,Nefm,RDX,SOD1	5
Cell Morphology, Cell-To-Cell Signaling and Interaction, Cellular Assembly and Organization, Nervous System Development and Function, Tissue Morphology	morphology	morphology of synapse						0.00329			APOE,B2M,CBLN1,KALRN,MYCBP2,Nedd4,NRN1,OTOF,SHANK3,SLC12A5,SNCB,UNC13A	12
Cell Morphology, Cell-To-Cell Signaling and Interaction, Cellular Assembly and Organization, Nervous System Development and Function, Neurological Disease, Tissue Morphology	abnormal morphology	abnormal morphology of synapse						0.00402			APOE,B2M,CBLN1,KALRN,MYCBP2,Nedd4,NRN1,OTOF,SHANK3,SLC12A5,UNC13A	11
Cell-To-Cell Signaling and Interaction, Nervous System Development and Function	long term depression	long term depression of neurons						0.0052	Decreased	-0.014	ADCY5,BAX,CAMK2A,GRIA2,PARK7,PINK1,PIP5K1C,PRKCG	8
Cell-To-Cell Signaling and Interaction, Nervous System Development and Function	neurotransmission	neurotransmission						0.00847	Decreased	-0.111	APOE,CAMK2A,CLSTN1,CRH,DLGAP3,DPYSL2,GRIA2,HDAC4,HOMER1,Nedd4,NGFR,NR3C1,Nrgn,PCDH17,PNKD,PRKCB,PTPRS,SHANK3,SNCB,STXBP1	20
Cell Signaling, Molecular Transport, Vitamin and Mineral Metabolism	uptake	uptake of Ca2+						0.0117			BAX,GRIA2	2
Cell Death and Survival	cell viability	cell viability of cerebral cortex cells						0.0118	Increased	1.4	APOE,BAX,MTOR,NGFR,NRN1,PINK1,PRKCG,SOD1,STXBP1	9
Cell Death and Survival	apoptosis	apoptosis of motor neurons						0.0127			BAX,NGFR,PDCD6IP,SOD1	4
DNA Replication, Recombination, and Repair	chromosomal aberration	chromosomal aberration						0.0127			C9orf142,FABP7,STMN2,TUBB4A	4
Cell Death and Survival	cell viability	cell viability of brain cells						0.0134	Increased	0.686	APOE,BAX,CAMK2B,MTOR,NGFR,NRN1,PARK7,PINK1,PRKCG,SOD1,STXBP1	11
Cell Morphology	shape change	shape change of axons						0.0134	Decreased	-0.502	APOE,BCL11B,DPYSL2,KALRN,MAPK8IP3,MTOR,NGFR,ROR2,S100B,SOD1,ULK2	11
Cell Death and Survival	cell viability	cell viability of central nervous system cells						0.0136	Increased	1.04	APOE,BAX,CAMK2B,GIT1,MTOR,NGFR,NRN1,PARK7,PINK1,PRKCG,SOD1,STXBP1	12
Cellular Development, Cellular Growth and Proliferation, Nervous System Development and Function, Tissue Development	outgrowth	outgrowth of neurites						0.0137	Decreased	-0.368	APOE,BAX,BRSK1,CAMK2A,CAMK2B,CNPY2,DAB2IP,DPYSL2,EEA1,ENPP2,GAP43,KIF3A,LRRK2,MYH10,MYO10,NEFH,NGFR,NOG,NRN1,NSMF,PIK3CA,PTN,PTPRS,RAP1GAP,SOD1,Wasl	26
Cell-To-Cell Signaling and Interaction, Nervous System Development and Function	synaptic transmission	synaptic transmission of pyramidal neurons						0.016	Decreased	-0.728	CLSTN1,GRIA2,HOMER1,Nedd4,NR3C1	5
Cell-To-Cell Signaling and Interaction, Nervous System Development and Function	long term depression	long term depression of striatum						0.0162			ADCY5,PARK7,PINK1	3
Cell-To-Cell Signaling and Interaction, Nervous System Development and Function	synaptic transmission	synaptic transmission of cerebral cortex cells						0.0163	Increased	0.85	CLSTN1,GRIA2,HOMER1,Nedd4,NR3C1,PTPRS,SHANK3,STXBP1	8
Cell-To-Cell Signaling and Interaction, Nervous System Development and Function	long term depression	long term depression of brain cells						0.0191	Increased	0.152	ADCY5,BAX,CAMK2A,GRIA2,PIP5K1C,PRKCG	6
Cell-To-Cell Signaling and Interaction, Nervous System Development and Function	long term depression	long term depression of hippocampus						0.0202	Decreased	-0.651	B2M,BAX,CAMK2A,GRIA2,MTOR,NGFR,PIP5K1C	7
Cell-To-Cell Signaling and Interaction, Nervous System Development and Function	synaptic transmission	synaptic transmission of cells						0.022	Increased	0.848	CLSTN1,DLGAP3,DPYSL2,GRIA2,HOMER1,Nedd4,NR3C1,PTPRS,SHANK3,STXBP1	10
Cellular Assembly and Organization	organization	organization of organelle						0.022			IFT27,KIF3A,MYO5A,Nedd4,NEFH,NEFL,Nefm,PIN1,RDX,SNCB,SOD1	11
Cell Death and Survival, Neurological Disease, Organismal Injury and Abnormalities	cell death	cell death of CA1 neuron						0.0221			HDAC4,MTOR,PPP1R9B	3
Cell-To-Cell Signaling and Interaction, Drug Metabolism, Small Molecule Biochemistry	overflow	overflow of dopamine						0.0223			NAT8L,PARK7	2
Cell Morphology, Nervous System Development and Function, Tissue Morphology	morphology	morphology of growth cone						0.0245			GAP43,MYH10,NGFR,RDX	4
Cell Morphology, Cellular Assembly and Organization, Cellular Development, Cellular Function and Maintenance, Cellular Growth and Proliferation, Embryonic Development, Nervous System Development and Function, Organismal Development, Tissue Development	branching	branching of axons						0.0256	Decreased	-0.558	APOE,DPYSL2,KALRN,MAPK8IP3,MTOR,ROR2,S100B,SOD1,ULK2	9
Cellular Development, Cellular Growth and Proliferation, Nervous System Development and Function, Tissue Development	growth	growth of neurites						0.0259	Decreased	-0.383	APOE,BAX,BRSK1,CAMK2A,CAMK2B,CNPY2,DAB2IP,DPYSL2,EEA1,ENPP2,GAP43,KIF3A,LRRK2,MTOR,MYH10,MYO10,Nedd4,NEFH,Nefm,NGFR,NOG,NRN1,NSMF,PIK3CA,PPP3CB,PTN,PTPRS,RAP1GAP,SOD1,TSC2,UBE4B,Wasl	32
Cell Morphology, Cellular Function and Maintenance, Nervous System Development and Function, Tissue Morphology	length	length of dendrites						0.026			APOE,KALRN,MAP2,NGFR,PVALB	5
Cell Death and Survival, Nervous System Development and Function	cell viability	cell viability of cortical neurons						0.0281	Increased	1.342	BAX,NRN1,PINK1,PRKCG,SOD1,STXBP1	6
Cell Morphology, Cellular Function and Maintenance	autophagy	autophagy						0.0295			MTOR,PINK1,RHEB,TSC2	4
Carbohydrate Metabolism	accumulation	accumulation of polysaccharide						0.0357			APOE,SOD1	2
Cell Morphology, Cellular Assembly and Organization, Cellular Development, Cellular Function and Maintenance, Cellular Growth and Proliferation, Embryonic Development, Nervous System Development and Function, Organismal Development, Tissue Development	branching	branching of apical processes						0.0357			APOE,CAPNS1	2
Cell Morphology, Cellular Assembly and Organization, Nervous System Development and Function, Tissue Morphology	size	size of presynaptic terminals						0.0357			B2M,MYO5A	2
Cell Morphology, Cellular Function and Maintenance	autophagy	autophagy of cortical neurons						0.0357			PINK1,TSC2	2
Cell-To-Cell Signaling and Interaction, Nervous System Development and Function	long term depression	long term depression of spiny neurons						0.0357			PARK7,PINK1	2
Cellular Development, Embryonic Development, Nervous System Development and Function, Organismal Development, Tissue Development	differentiation	differentiation of neurosphere cells						0.0357			METRN,NGFR	2
Protein Degradation, Protein Synthesis	catabolism	catabolism of protein						0.0357			SOD1,SPTBN2	2
Cellular Assembly and Organization, Nervous System Development and Function, Tissue Morphology	abnormal quantity	abnormal quantity of synaptic vesicles						0.0393			B2M,CAMK2A,Nedd4,PCDH17,UNC13A	5
Cell-To-Cell Signaling and Interaction, Cellular Assembly and Organization, Cellular Function and Maintenance, Molecular Transport	priming	priming of synaptic vesicles						0.0457			OTOF,STXBP1,UNC13A	3
Cell-To-Cell Signaling and Interaction, Nervous System Development and Function	long term depression	long term depression of hippocampal cells						0.0479			BAX,CAMK2A,GRIA2,PIP5K1C	4
