# Supplementary material for: Axon TRAP reveals learning-associated alterations in cortical axonal mRNAs in the lateral amygdala
Source: eLife. 2019 Dec 11;8:e51607. doi: 10.7554/eLife.51607 (PMC6924958; doi:10.7554/eLife.51607)
Supplement: Supplementary file 8. [file elife-51607-supp8.xlsx]

## Sheet: Supplementary file 8
Transcript level differential expression analysis			Control axons TRAP versus trained axons TRAP						Control cortex TRAP versus control axons TRAP						Trained cortex TRAP versus trained axons TRAP						Control cortex TRAP versus trained cortex TRAP
gene	transcript	locus	Control axons FPKM	Trained axons FPKM	log2(fold_change)	test_stat	p_value	q_value	Control axons FPKM	Control cortex FPKM	log2(fold_change)	test_stat	p_value	q_value	Trained axons FPKM	Trained cortex FPKM	log2(fold_change)	test_stat	p_value	q_value	Control cortex FPKM	Trained cortex FPKM	log2(fold_change)	test_stat	p_value	q_value
A1bg	NM_022258	chr7:102294800-102298522	0	0	0	0	1	1	0	0	0	0	1	1	0	0	0	0	1	1	0	0	0	0	1	1
A1cf	NM_133400	chr1:250426191-250512413	0	0	0	0	1	1	0	0	0	0	1	1	0	0	0	0	1	1	0	0	0	0	1	1
A1i3	NM_001037975	chr4:154505746-154565099	0	0	0	0	1	1	0	0	0	0	1	1	0	0	0	0	1	1	0	0	0	0	1	1
A2m	NM_012488	chr4:154309425-154359138	0	0	0	0	1	1	0	0.00453113	inf	0	1	1	0	0	0	0	1	1	0.00436938	0	#NAME?	0	1	1
A2m	NM_012488_1	chr4:154423167-154473038	0	0	0	0	1	1	0	0	0	0	1	1	0	0	0	0	1	1	0	0	0	0	1	1
A3galt2	NM_138524	chr5:146933591-146945882	2.87969	1.54034	-0.902666	-0.637413	0.2989	0.634455	2.77854	0	#NAME?	#NAME?	5e-05	0.000964063	1.49063	0.0546474	-4.76962	-1.63965	0.2405	0.606733	0	0.0534557	inf	0	1	1
A4galt	NM_022240	chr7:124085831-124089385	0	0	0	0	1	1	0	0	0	0	1	1	0	0	0	0	1	1	0	0	0	0	1	1
AA926063	NR_002156	chr20:5486473-5498987	0.110061	1.23213	3.48478	1.1919	0.42985	0.729809	0.106084	2.32668	4.45499	1.23611	0.30785	0.540339	1.19632	1.08344	-0.142982	-0.053542	0.6968	0.874913	2.23636	1.05668	-1.08161	-0.425744	0.54035	0.825804
Aaas	NM_001106795	chr7:143937198-143956668	7.3473	6.11382	-0.26514	-0.392028	0.59315	0.823817	7.09104	6.99279	-0.0201289	-0.029546	0.9688	0.981339	5.9394	7.63493	0.362298	0.471545	0.51655	0.780783	6.71775	7.45334	0.149909	0.195691	0.803	0.936487
Aacs	NM_023104	chr12:36512392-36555694	14.3472	7.36523	-0.961962	-1.89308	0.00905	0.0955477	13.8459	11.9495	-0.212509	-0.454453	0.5202	0.715063	7.14583	15.3018	1.09853	1.92684	0.0112	0.127315	11.491	14.9414	0.378815	0.746428	0.30925	0.715187
Aadac	NM_020538	chr2:150146233-150157480	0	0	0	0	1	1	0	0	0	0	1	1	0	0	0	0	1	1	0	0	0	0	1	1
Aadacl2	NM_001191706	chr2:150344306-150365033	0	0	0	0	1	1	0	0	0	0	1	1	0	0	0	0	1	1	0	0	0	0	1	1
Aadacl2	NM_001191706_1	chr2:150106291-150126908	0	0	0	0	1	1	0	0	0	0	1	1	0	0	0	0	1	1	0	0	0	0	1	1
Aadacl3	NM_001191768	chr5:162323372-162331598	0	0	0	0	1	1	0	0	0	0	1	1	0	0	0	0	1	1	0	0	0	0	1	1
Aadat	NM_017193	chr16:32832058-32868680	1.34583	3.43604	1.35225	1.11902	0.1121	0.412741	1.2956	5.73532	2.14626	1.7982	0.00935	0.0619966	3.33623	2.53075	-0.398656	-0.351102	0.60235	0.824555	5.5097	2.46908	-1.158	-0.986202	0.1695	0.620037
Aaed1	NM_001109114	chr17:1798387-1830001	6.65388	7.22729	0.119258	0.0909459	0.89515	0.962097	6.41919	1.19155	-2.42955	-1.40063	0.03615	0.159739	7.00881	2.44001	-1.52228	-0.831167	0.1418	0.490164	1.14573	2.37692	1.05282	0.470817	0.25515	0.680036
Aagab	NM_134398	chr8:68526094-68563018	29.4132	21.5901	-0.446092	-0.766551	0.2663	0.607365	28.3957	20.6225	-0.461448	-0.745317	0.2789	0.514345	20.9492	27.7127	0.403647	0.59714	0.39385	0.714937	19.8426	27.0405	0.446523	0.628001	0.3528	0.739486
Aak1	NM_001173450	chr4:118655727-118795774	20.3839	20.4055	0.0015339	0.00576421	0.99345	0.996959	19.6675	26.0897	0.407664	1.57746	0.02515	0.125195	19.7975	26.279	0.408596	1.44883	0.0427	0.278373	25.0899	25.6527	0.0320056	0.118402	0.8659	0.956311
Aamdc	NM_001108493	chr1:162519512-162549205	20.4397	37.7859	0.886474	1.44782	0.0412	0.235331	19.7186	60.196	1.61011	2.56719	0.0025	0.0232969	36.6718	38.2894	0.0622763	0.105233	0.8831	0.955578	57.8838	37.3571	-0.631776	-1.13444	0.1052	0.528853
Aamp	NM_001106920	chr9:81560835-81634531	162.089	147.099	-0.139999	-0.486943	0.5105	0.77819	156.459	91.0986	-0.78028	-2.748	0.00105	0.0118244	142.806	129.564	-0.140386	-0.443165	0.55145	0.799341	87.5378	126.534	0.531545	1.67291	0.0354	0.350845
Aanat	NM_012818	chr10:105568090-105572403	0.249029	0	#NAME?	0	1	1	0.240663	0	#NAME?	0	1	1	0	0	0	0	1	1	0	0	0	0	1	1
Aar2	NM_001106535	chr3:152626756-152648344	7.0871	5.81121	-0.286355	-0.461972	0.50175	0.773935	6.83707	3.70469	-0.884027	-1.21752	0.0859	0.277412	5.63765	3.68488	-0.613475	-0.726655	0.3236	0.659585	3.56086	3.5999	0.0157297	0.0169709	0.98235	0.994067
Aard	NM_145093	chr7:91588457-91593299	3.03335	7.07783	1.22239	1.0664	0.1483	0.471161	2.92606	8.25012	1.49545	1.35534	0.0613	0.225839	6.87723	1.32851	-2.37202	-1.36636	0.005	0.07603	7.92642	1.29361	-2.61526	-1.45927	0.1711	0.621668
Aars	NM_001100517	chr19:43193263-43215281	56.7118	41.419	-0.453357	-1.54517	0.02665	0.183276	54.7308	42.6312	-0.36044	-1.21335	0.08845	0.281996	40.1715	49.3773	0.297676	0.905617	0.1958	0.560947	40.9906	48.191	0.233471	0.706346	0.31435	0.718532
Aars2	NM_001106891	chr9:17869704-17880763	4.40928	1.74465	-1.3376	-1.40326	0.06175	0.297627	4.25705	4.42271	0.0550735	0.0782401	0.92325	0.956325	1.69285	2.739	0.694192	0.594154	0.4276	0.732535	4.24518	2.67652	-0.665468	-0.754971	0.35765	0.74292
Aarsd1	NM_001034109	chr10:89317973-89331078	66.5199	60.2829	-0.142038	-0.547526	0.4359	0.734874	64.1517	49.0985	-0.385807	-1.47031	0.03555	0.157861	58.4794	61.2573	0.0669547	0.237357	0.73625	0.892979	47.2139	59.7837	0.34054	1.19309	0.09115	0.50418
Aasdhppt	NM_001106798	chr8:1439329-1450095	99.0997	52.1864	-0.925208	-2.45867	0.00165	0.0307352	95.5609	65.2947	-0.549455	-1.47993	0.04275	0.178921	50.5722	75.6253	0.580526	1.31537	0.07795	0.382792	62.8052	73.7791	0.232328	0.54149	0.45815	0.791212
Aass	NM_001100963	chr4:50152004-50208935	0.953701	1.45572	0.610123	0.494666	0.47915	0.760426	0.918523	0.623615	-0.55866	-0.283095	0.70805	0.840332	1.41292	0.158192	-3.15893	-1.64136	0.26235	0.6185	0.599077	0.154196	-1.95798	-0.908827	0.3524	0.739154
Aatf	NM_053720	chr10:71744656-71837851	10.3636	10.1372	-0.0318642	-0.0447486	0.95085	0.98201	9.99633	12.4784	0.319957	0.448762	0.516	0.711138	9.83409	9.08849	-0.113751	-0.132996	0.84775	0.941559	12.003	8.86767	-0.436771	-0.525886	0.4425	0.780718
Aatk	NM_001168703	chr10:109188077-109224370	52.1197	28.8784	-0.851838	-3.55974	5e-05	0.0023396	50.3148	42.6129	-0.239693	-1.12447	0.18205	0.424542	28.0497	49.3577	0.815292	3.16132	5e-05	0.0020606	40.934	48.2113	0.236069	1.04191	0.2295	0.676959
Abat	NM_031003	chr10:7094257-7200439	175.797	94.5827	-0.894259	-3.18341	5e-05	0.0023396	169.714	67.0017	-1.34084	-4.4049	5e-05	0.000964063	91.7725	110.443	0.267171	0.831225	0.2397	0.606284	64.423	107.829	0.743095	2.13113	0.00365	0.107147
Abca1	NM_178095	chr5:69860746-69952466	0.383393	0.197852	-0.954401	0	1	1	0.369801	0.629651	0.767801	0.451349	0.5217	0.715979	0.192355	0.293163	0.607928	0	1	1	0.605253	0.285693	-1.08307	-0.620689	0.27945	0.695649
Abca13	NM_001106020	chr14:89384511-89876748	0	0	0	0	1	1	0	0	0	0	1	1	0	0	0	0	1	1	0	0	0	0	1	1
Abca15	NM_001106293	chr1:189457581-190370515	0	0	0	0	1	1	0	0	0	0	1	1	0	0	0	0	1	1	0	0	0	0	1	1
Abca17	NM_001031637	chr10:13630096-13716931	0.00509689	0.157282	4.94759	0	1	1	0.00490705	0.0440499	3.16621	0	1	1	0.15269	0	#NAME?	0	1	1	0.0422476	0	#NAME?	0	1	1
Abca2	NM_024396	chr3:2648864-2668770	54.6091	36.6283	-0.576183	-2.41083	0.00145	0.0278982	52.727	31.2514	-0.754619	-3.37445	5e-05	0.000964063	35.5581	30.6898	-0.212422	-0.798773	0.28565	0.633733	30.0216	29.9668	-0.00263331	-0.0103609	0.99025	0.99628
Abca4	NM_001107721	chr2:225645567-225783287	0.182178	0	#NAME?	0	1	1	0.175601	0	#NAME?	0	1	1	0	0.00391482	inf	0	1	1	0	0.00382953	inf	0	1	1
Abca5	NM_173307	chr10:98576038-98644800	0.376833	0.230786	-0.707369	0	1	1	0.362576	0.352369	-0.0411955	0	1	1	0.224057	0.394351	0.815611	0	1	1	0.339066	0.384115	0.179972	0	1	1
Abca7	NM_207598	chr7:12541055-12793634	1.52689	2.36071	0.628626	0.281525	0.6706	0.860823	1.47391	2.31175	0.649342	0.316082	0.72735	0.851544	2.29224	2.55767	0.158075	0.0711286	0.5899	0.819436	2.21923	2.49547	0.169255	0.0775169	0.9341	0.98228
Abca8a	NM_001281824	chr10:98319479-98390384	4.00846	3.29856	-0.281211	-0.50194	0.48625	0.763921	3.86108	5.43121	0.492269	0.911266	0.19935	0.44752	3.19752	3.36902	0.0753769	0.112882	0.879	0.953476	5.2206	3.28642	-0.667697	-1.06353	0.1306	0.562158
Abcb10	NM_001012166	chr19:56742830-56772904	12.5353	11.5704	-0.115556	-0.277807	0.71055	0.882191	12.1004	9.26103	-0.38581	-0.882912	0.2447	0.488375	11.2385	16.6742	0.569159	1.27932	0.09235	0.415219	8.89381	16.2784	0.872084	1.88959	0.01555	0.245505
Abcb11	NM_031760	chr3:55480023-55587946	0.00639989	0.0182009	1.50789	0	1	1	0.00615834	0	#NAME?	0	1	1	0.0176087	0	#NAME?	0	1	1	0	0	0	0	1	1
Abcb1a	NM_133401	chr4:22339828-22425381	0.19295	0.0496189	-1.95926	0	1	1	0.186549	0.331474	0.829342	0	1	1	0.0480731	0.417126	3.11718	0	1	1	0.319197	0.407407	0.352027	0	1	1
Abcb1b	NM_012623	chr4:22225460-22307453	0.0300463	0	#NAME?	0	1	1	0.0290161	0.031101	0.100106	0	1	1	0	0.0213941	inf	0	1	1	0.0298225	0.020833	-0.517531	0	1	1
Abcb4	NM_012690	chr4:22134804-22192472	0.734238	0.186186	-1.9795	-1.06828	0.0992	0.389149	0.707934	0.454259	-0.640099	-0.346895	0.6322	0.79215	0.180687	0.405884	1.16757	0	1	1	0.437521	0.395418	-0.145972	0	1	1
Abcb6	NM_080582	chr9:82373949-82382228	12.8104	13.209	0.0442047	0.0935884	0.89145	0.960149	12.3629	12.9336	0.0651064	0.132138	0.8555	0.922009	12.8237	14.721	0.199064	0.382439	0.5873	0.81843	12.4299	14.3711	0.209351	0.388367	0.59045	0.849891
Abcb7	NM_212518	chrX:75150510-75291950	0.328404	0.312459	-0.0718085	0	1	1	0.316208	0.0602733	-2.39128	0	1	1	0.303761	0.981398	1.6919	0.705871	0.41235	0.724509	0.0581217	0.960104	4.04604	1.34929	0.20685	0.656151
Abcb8	NM_001007796	chr4:7297168-7311750	11.1007	7.85411	-0.499134	-0.850049	0.23525	0.583659	10.7131	2.41299	-2.15048	-2.21913	0.00555	0.0427481	7.62789	7.73035	0.0192495	0.0251421	0.9724	0.99054	2.32216	7.54222	1.69952	1.39017	0.0547	0.412425
Abcb9	NM_022238	chr12:37923973-37956678	9.36105	10.1466	0.11626	0.229633	0.74755	0.90153	9.03806	19.607	1.11728	2.4874	0.00235	0.0221278	9.84441	16.4042	0.736685	1.44931	0.0478	0.294969	18.8294	16.0192	-0.233181	-0.56711	0.50145	0.809911
Abcc1	NM_022281	chr10:549536-672235	4.24302	3.3414	-0.344637	-0.5498	0.4184	0.722813	4.0923	2.19183	-0.900779	-1.24546	0.0769	0.259275	3.24032	1.79376	-0.853149	-0.981232	0.1586	0.517576	2.10536	1.75261	-0.264566	-0.26328	0.7276	0.906603
Abcc10	NM_001108201	chr9:17041350-17065600	0.60813	1.07003	0.815199	0.369744	0.52565	0.786425	0.586707	0.816644	0.477069	0.212524	0.74955	0.863388	1.03869	0.390102	-1.41283	-0.683884	0.3786	0.703981	0.785284	0.38055	-1.04513	-0.502456	0.47495	0.798429
Abcc12	NM_199377	chr19:21541741-21612527	0	0	0	0	1	1	0	0.149348	inf	0	1	1	0	0	0	0	1	1	0.144019	0	#NAME?	0	1	1
Abcc2	NM_012833	chr1:263554425-263612556	0.680283	0.496541	-0.454222	-0.321957	0.6305	0.842384	0.656569	0.488689	-0.42603	-0.255357	0.70305	0.837757	0.481279	0.455418	-0.079681	0	1	1	0.470181	0.444551	-0.0808673	0	1	1
Abcc3	NM_080581	chr10:82047307-82116669	0.281943	0.154283	-0.869824	0	1	1	0.272327	0.0958703	-1.50618	0	1	1	0.14989	0.0334835	-2.16238	0	1	1	0.0921112	0.0326794	-1.495	0	1	1
Abcc4	NM_133411	chr15:103696541-103927592	0.932374	0.515359	-0.855331	-0.487758	0.48755	0.765129	0.899503	0.118653	-2.92238	-1.5922	0.1855	0.428411	0.498993	1.00212	1.00597	0.614194	0.3597	0.687909	0.114003	0.976629	3.09874	1.60053	0.2392	0.678537
Abcc5	NM_053924	chr11:84330063-84583542	12.2158	11.2853	-0.114314	-0.232117	0.7481	0.901635	11.7933	9.82805	-0.262988	-0.589391	0.41595	0.63682	10.9554	12.1122	0.144813	0.27798	0.69875	0.874975	9.44649	11.8275	0.324296	0.670087	0.35765	0.74292
Abcc6	NM_031013	chr1:101959539-102013243	0.200542	0.349463	0.801232	0	1	1	0.193593	0.218336	0.173529	0	1	1	0.338237	0.0798129	-2.08334	0	1	1	0.210511	0.0777208	-1.43752	0	1	1
Abcc8	NM_013039	chr1:102110707-102191287	2.84309	2.04385	-0.476168	-0.608925	0.3842	0.700367	2.74688	2.60828	-0.0746932	-0.0977264	0.89785	0.942469	1.98229	3.46948	0.807554	0.922703	0.2059	0.569595	2.50729	3.38894	0.434705	0.54352	0.4516	0.786154
Abcc9	NM_013040	chr4:176806121-176928540	0.326887	0.0911057	-1.84318	0	1	1	0.315694	0.0228186	-3.79024	0	1	1	0.0881407	0.00351069	-4.64998	0	1	1	0.0220043	0.00343448	-2.67962	0	1	1
Abcd1	NM_001108821	chrX:157074116-157095511	2.17274	1.56003	-0.477936	-0.526634	0.48655	0.76406	2.0972	0.696669	-1.58992	-1.11021	0.05745	0.218239	1.5166	1.79027	0.239344	0.208595	0.7812	0.912076	0.671317	1.74571	1.37875	0.73747	0.19915	0.651405
Abcd2	NM_033352	chr7:132294563-132343169	6.87339	4.5876	-0.583281	-1.27094	0.0744	0.329297	6.6314	6.10803	-0.118607	-0.269803	0.70535	0.838878	4.4502	7.36398	0.726614	1.43134	0.0456	0.287792	5.87844	7.18684	0.289924	0.607432	0.3975	0.763007
Abcd3	NM_012804	chr2:225335707-225389120	14.823	14.6825	-0.0137353	-0.036587	0.95945	0.984509	14.286	17.744	0.312724	0.848838	0.23675	0.482179	14.2378	12.5441	-0.182707	-0.420995	0.5482	0.79811	17.0715	12.2422	-0.479722	-1.14435	0.111	0.539649
Abcd4	NM_001013100	chr6:108315025-108329464	2.03977	2.61977	0.36103	0.283541	0.7012	0.877819	1.96929	1.53228	-0.361998	-0.279874	0.69755	0.834086	2.54258	1.72957	-0.555882	-0.37663	0.55635	0.801885	1.47142	1.68453	0.195139	0.101773	0.8848	0.964942
Abce1	NM_001108446	chr19:31867980-31892863	17.5656	16.5698	-0.0841968	-0.235864	0.74365	0.899167	16.9278	10.1374	-0.739705	-1.81043	0.0117	0.0735832	16.0684	11.2601	-0.513006	-1.17286	0.094	0.418284	9.74799	10.9913	0.173189	0.352686	0.6166	0.861582
Abcf1	NM_001109883	chr20:3309946-3322828	113.171	120.039	0.0849943	0.335254	0.62925	0.84235	109.239	154.714	0.502116	2.06934	0.0033	0.0285927	116.468	163.234	0.487004	1.84286	0.0105	0.12149	148.72	159.355	0.0996462	0.402025	0.565	0.838654
Abcf2	NM_001109666	chr4:7122915-7135604	56.0279	43.8369	-0.354	-1.12108	0.11755	0.422198	54.0959	48.3955	-0.160648	-0.508248	0.479	0.686348	42.5467	53.2896	0.324808	0.918176	0.1995	0.564776	46.4926	52.0315	0.162383	0.464257	0.52775	0.821197
Abcf3	NM_001011896	chr11:84026205-84037938	38.9006	31.9439	-0.284252	-0.787691	0.2649	0.606063	37.5534	28.6607	-0.389869	-1.02628	0.1469	0.376912	30.9876	37.8408	0.288252	0.7201	0.30985	0.64926	27.5611	36.9477	0.422848	1.00648	0.1593	0.606074
Abcg1	NM_053502	chr20:9743268-9840489	19.8303	16.8376	-0.236019	-0.626164	0.38075	0.697229	19.1411	12.852	-0.574681	-1.41408	0.0479	0.193232	16.333	14.3921	-0.182516	-0.406224	0.56015	0.80384	12.3568	14.0507	0.185337	0.38772	0.5832	0.846017
Abcg2	NM_181381	chr4:88834065-88890268	2.18927	0.880634	-1.31384	-0.862481	0.2226	0.571172	2.10609	1.10868	-0.925731	-0.57766	0.444	0.658279	0.853646	0.922214	0.111464	0.0622069	0.92915	0.974872	1.06694	0.899919	-0.245612	-0.141504	0.8458	0.950321
Abcg3	NM_001128311	chr14:5568022-6541177	0.0205427	0	#NAME?	0	1	1	0.0197494	0.190761	3.27189	0	1	1	0	0	0	0	1	1	0.1836	0	#NAME?	0	1	1
Abcg3l1	NM_001004076	chr14:5568022-6541177	0.828494	1.99625	1.26873	0.711988	0.44655	0.741272	0.797856	1.16686	0.548428	0.265493	0.804	0.894861	1.93383	0.658113	-1.55506	-0.723587	0.40175	0.718983	1.12441	0.642907	-0.806485	-0.335639	0.721	0.904456
Abcg3l2	NM_001014133	chr14:5568022-6541177	0.0947813	0	#NAME?	0	1	1	0.0913123	0.0726695	-0.32946	0	1	1	0	0	0	0	1	1	0.0700759	0	#NAME?	0	1	1
Abcg3l3	NM_001107205	chr14:5568022-6541177	0.0142776	0.0129763	-0.137876	0	1	1	0.0137553	0.114435	3.05647	0	1	1	0.0126183	0.102077	3.01608	0	1	1	0.110159	0.0998603	-0.141608	0	1	1
Abcg3l4	NM_001037205	chr14:5568022-6541177	0.0223607	0	#NAME?	0	1	1	0.0215172	0	#NAME?	0	1	1	0	0	0	0	1	1	0	0	0	0	1	1
Abcg4	NM_001106816	chr8:48604914-48620482	11.646	8.03654	-0.535183	-1.23414	0.09575	0.38163	11.2422	7.16719	-0.649448	-1.45976	0.06005	0.223056	7.79852	8.07725	0.0506621	0.0928216	0.89845	0.96002	6.88851	7.88281	0.194519	0.350615	0.63595	0.869706
Abcg5	NM_053754	chr6:7935770-7961207	0.604332	0	#NAME?	0	1	1	0.582652	0.271247	-1.10303	0	1	1	0	0	0	0	1	1	0.260156	0	#NAME?	0	1	1
Abcg8	NM_130414	chr6:7961412-7980708	0	0.269904	inf	0	1	1	0	0	0	0	1	1	0.262504	0	#NAME?	0	1	1	0	0	0	0	1	1
Abhd1	NM_001008520	chr6:26784087-26792795	14.211	20.994	0.562966	0.868927	0.24265	0.589758	13.7148	11.0868	-0.306885	-0.360025	0.6477	0.801482	20.3878	8.96006	-1.18612	-1.47727	0.1074	0.4434	10.6463	8.75891	-0.281524	-0.267505	0.77205	0.924358
Abhd10	NM_001123352	chr11:57486769-57498894	0	0	0	0	1	1	0	0	0	0	1	1	0	0	0	0	1	1	0	0	0	0	1	1
Abhd10	NM_001123352_1	chr11:60054435-60066560	0	0	0	0	1	1	0	0	0	0	1	1	0	0	0	0	1	1	0	0	0	0	1	1
Abhd11	NM_001271180	chr12:24722280-24724997	34.9168	38.7182	0.149087	0.320498	0.6526	0.853355	33.6987	31.157	-0.113138	-0.233517	0.7599	0.869839	37.5698	28.6736	-0.389852	-0.713868	0.32895	0.665013	29.9213	27.9989	-0.0958022	-0.169076	0.8367	0.947573
Abhd12	NM_001024314	chr3:146630297-146690375	95.6453	91.997	-0.0561072	-0.205058	0.7705	0.908201	92.3275	83.5658	-0.143849	-0.524874	0.47285	0.681069	89.2807	61.9522	-0.527193	-1.66341	0.02465	0.203032	80.3014	60.4955	-0.408598	-1.28037	0.08445	0.490828
Abhd12b	NM_001003928	chr6:92574769-92596327	0	0	0	0	1	1	0	0	0	0	1	1	0	0	0	0	1	1	0	0	0	0	1	1
Abhd13	NM_001271072	chr16:85315274-85330108	2.38583	3.94696	0.726253	1.28123	0.06815	0.313126	2.30189	2.63026	0.19239	0.306492	0.66665	0.813714	3.82581	2.47472	-0.628499	-0.986067	0.1533	0.508804	2.53169	2.4159	-0.0675385	-0.0975654	0.88965	0.967076
Abhd14a	NM_001009670	chr8:115141579-115149419	9.21714	15.3581	0.736605	1.08619	0.1251	0.433093	8.90078	13.5308	0.604247	0.866926	0.28535	0.519434	14.8928	10.4197	-0.515303	-0.657066	0.32325	0.659563	12.9858	10.1655	-0.353246	-0.46933	0.5288	0.822048
Abhd14b	NM_001007664	chr8:115150513-115154551	15.2263	15.5413	0.0295403	0.0571065	0.93665	0.976554	14.6917	13.6936	-0.101497	-0.185391	0.8012	0.89401	15.0826	20.2677	0.426297	0.764751	0.2796	0.629775	13.1563	19.7851	0.588663	1.01712	0.16855	0.61848
Abhd15	NM_001107025	chr10:62643452-62648844	0	0.00703329	inf	0	1	1	0	0.181613	inf	0	1	1	0.00680523	0	#NAME?	0	1	1	0.175129	0	#NAME?	0	1	1
Abhd16a	NM_212531	chr20:5080069-5094935	52.962	60.9976	0.203796	0.677683	0.37355	0.692298	51.1348	69.0293	0.432903	1.46277	0.06585	0.235857	59.2417	63.8659	0.108434	0.340231	0.6627	0.857452	66.3206	62.3939	-0.088052	-0.287123	0.728	0.906802
Abhd16b	NM_001014052	chr3:176985899-176987797	0.148408	0.0687037	-1.11111	0	1	1	0.143044	0	#NAME?	0	1	1	0.0664756	0	#NAME?	0	1	1	0	0	0	0	1	1
Abhd17a	NM_001006983	chr7:11992542-11998974	365.535	267.775	-0.448989	-2.09283	0.0113	0.111834	352.929	274.056	-0.364906	-2.03644	0.0335	0.151454	260.083	434.419	0.740117	3.41936	0.0001	0.00359969	263.18	424.506	0.689736	3.93605	0.0002	0.0111749
Abhd17b	NM_001014028	chr1:239266873-239300254	25.8446	18.0241	-0.519937	-1.16642	0.10465	0.400981	24.9115	13.9027	-0.841442	-1.8028	0.02395	0.120604	17.4842	11.5561	-0.597396	-1.02658	0.14355	0.492564	13.3945	11.269	-0.249282	-0.414349	0.5863	0.847008
Abhd17c	NM_001100736	chr1:146248500-146289465	21.7249	12.7964	-0.763609	-1.80032	0.01575	0.135673	20.9692	13.1808	-0.669833	-1.58657	0.0277	0.133303	12.4205	9.36075	-0.408024	-0.731736	0.299	0.642927	12.6785	9.14413	-0.471465	-0.84284	0.21205	0.66016
Abhd2	NM_001106275	chr1:140998239-141087405	1.52254	2.2775	0.580964	0.448048	0.48775	0.765129	1.46939	5.36069	1.86721	1.16546	0.1179	0.332485	2.20851	3.0431	0.462465	0.339496	0.639	0.84526	5.151	2.97256	-0.793148	-0.719134	0.3371	0.731363
Abhd3	NM_001106162	chr18:1892412-1946840	34.9523	36.1096	0.0469932	0.136121	0.84615	0.940006	33.6962	29.022	-0.215438	-0.587427	0.41585	0.63682	35.0227	28.2749	-0.308767	-0.774077	0.27805	0.629078	27.921	27.5931	-0.0170424	-0.0407383	0.95115	0.986564
Abhd4	NM_001108866	chr15:32894937-32906861	28.7084	11.6568	-1.3003	-3.21902	0.00015	0.00511574	27.7233	12.1165	-1.19412	-2.86061	0.0005	0.00657119	11.3207	19.75	0.802891	1.66105	0.0274	0.217688	11.6436	19.2894	0.728272	1.47048	0.05315	0.407648
Abhd5	NM_212524	chr8:130973221-130999554	0.678978	0.325278	-1.06169	-0.406994	0.6105	0.831195	0.654419	0.266335	-1.29697	-0.520258	0.56465	0.745763	0.316189	0.185644	-0.76825	0	1	1	0.255907	0.18126	-0.497558	0	1	1
Abhd6	NM_001007680	chr15:18647904-18695133	17.2999	20.2144	0.22462	0.518298	0.4617	0.750238	16.6946	16.1915	-0.0441418	-0.0928753	0.89365	0.940565	19.613	17.3716	-0.175077	-0.355916	0.60965	0.82907	15.5766	16.945	0.121484	0.228905	0.7384	0.91165
Abhd8	NM_001107301	chr16:19866027-19872765	401.416	330.518	-0.280372	-1.35083	0.0906	0.370443	387.577	342.13	-0.179935	-1.00624	0.24745	0.490922	321.015	439.257	0.452426	2.1218	0.00945	0.114213	328.66	429.088	0.384675	2.10287	0.0224	0.286591
Abi1	NM_024397	chr17:89951751-90033330	23.3591	28.6032	0.292188	0.932637	0.1859	0.527958	22.5284	24.8505	0.141527	0.439143	0.5279	0.721363	27.7268	18.5345	-0.581068	-1.62834	0.0237	0.199002	23.8982	18.0863	-0.402005	-1.10326	0.1177	0.548255
Abi2	NM_173143	chr9:67234611-67284497	38.0875	37.5696	-0.0197511	-0.0724642	0.9157	0.969892	36.7354	31.7624	-0.209848	-0.759288	0.27915	0.514401	36.4422	41.6332	0.192123	0.647162	0.3573	0.686409	30.5573	40.6472	0.41164	1.37471	0.05285	0.406425
Abi3	NM_001013118	chr10:83644085-83655182	4.15583	5.78667	0.477596	0.567835	0.47385	0.756324	4.01188	8.23912	1.03821	1.29848	0.1007	0.304629	5.62591	4.22195	-0.414178	-0.415672	0.57875	0.813208	7.9106	4.11662	-0.942326	-0.892784	0.2351	0.678537
Abl1	NM_001100850	chr3:10041819-10145076	0.201804	0.362073	0.843324	0	1	1	0.194896	0.113688	-0.777626	0	1	1	0.351586	0.633565	0.849615	0	1	1	0.109455	0.618591	2.49865	1.06035	0.3069	0.713469
Abl2	NM_001107186	chr13:74154834-74333244	3.30738	1.56519	-1.07936	-0.810669	0.28	0.620114	3.19497	1.71713	-0.895803	-0.785758	0.2891	0.522287	1.51655	2.2866	0.592406	0.410851	0.56385	0.805905	1.65137	2.23312	0.435393	0.301802	0.6809	0.887287
Ablim2	NM_001001514	chr14:80045078-80169472	29.0021	30.9705	0.0947372	0.261764	0.7236	0.889704	28.0099	23.2222	-0.270431	-0.736097	0.34855	0.578843	30.0665	20.3441	-0.563546	-1.14216	0.1282	0.472074	22.3062	19.8698	-0.166867	-0.331531	0.6652	0.879884
Ablim2	NM_001177695	chr14:80045078-80169472	3.31994	4.6539	0.487283	0.441375	0.54245	0.797484	3.20541	0.237769	-3.75288	-1.07114	0.27965	0.514733	4.51424	2.94594	-0.615754	-0.295456	0.59645	0.822615	0.229278	2.86874	3.64525	0.935629	0.48755	0.80467
Ablim3	NM_001191698	chr18:57127981-57245699	4.54002	3.94852	-0.201386	-0.267744	0.7198	0.887802	4.38625	1.35552	-1.69414	-1.57735	0.0482	0.193975	3.83388	2.50312	-0.615078	-0.594252	0.4139	0.725303	1.30338	2.44253	0.906115	0.553844	0.3881	0.757342
Abo	NM_001160263	chr3:4374678-4394374	5.32265	2.47536	-1.10451	-0.968833	0.1924	0.536774	5.13821	1.8564	-1.46876	-0.964679	0.2063	0.455196	2.40304	1.86671	-0.364364	-0.1813	0.79515	0.920237	1.78319	1.81793	0.0278343	0.0152092	0.98175	0.993779
Abo2	NM_001271298	chr3:5386433-5402666	0	0	0	0	1	1	0	0	0	0	1	1	0	0	0	0	1	1	0	0	0	0	1	1
Abr	NM_001105814	chr10:64565120-64657079	265.153	90.9445	-1.54377	-6.50908	5e-05	0.0023396	255.976	85.9274	-1.57482	-7.36564	5e-05	0.000964063	88.2079	179.285	1.02327	4.08393	5e-05	0.0020606	82.6027	175.052	1.08353	4.71231	5e-05	0.00359193
Abra	NM_175844	chr7:80792614-80796683	0.393329	0	#NAME?	0	1	1	0.380538	1.89296	2.31453	1.01307	0.3181	0.550013	0	0.0277977	inf	0	1	1	1.82348	0.0270688	-6.07392	-2.03841	0.1699	0.620037
Abracl	NM_001099647	chr1:13165582-13175773	47.3034	80.7493	0.771505	1.74025	0.0201	0.154997	45.5632	111.553	1.29178	2.94987	0.00065	0.00816715	78.2739	68.1851	-0.199075	-0.440307	0.54945	0.798626	107.323	66.526	-0.689971	-1.62361	0.02745	0.318843
Abt1	NM_001025674	chr17:43946129-43948224	38.1912	75.0548	0.974704	2.60126	0.00075	0.0174077	36.8667	66.0402	0.841025	2.13534	0.0048	0.0380462	72.8496	53.2857	-0.451172	-1.17037	0.1109	0.448951	63.4621	52.0395	-0.28629	-0.718341	0.3374	0.731654
Abtb1	NM_001005902	chr4:120778579-120784807	22.1036	20.322	-0.121239	-0.26979	0.7054	0.880095	21.3308	18.4078	-0.212626	-0.460927	0.55175	0.737617	19.7197	18.2654	-0.11052	-0.205884	0.7756	0.90959	17.69	17.8304	0.01141	0.0213468	0.97985	0.993426
Abtb2	NM_134403	chr3:93494705-93648750	3.06214	3.61455	0.239275	0.330474	0.62265	0.838177	2.95793	1.12537	-1.39419	-1.28932	0.05925	0.221701	3.50134	3.61889	0.047641	0.0584093	0.9326	0.976033	1.08329	3.53387	1.70583	1.30634	0.05965	0.425273
Ac1576	NM_001287624	chr10:71278697-71358887	0.0319305	0	#NAME?	0	1	1	0.0307465	0.0704604	1.19639	0	1	1	0	0	0	0	1	1	0.0678096	0	#NAME?	0	1	1
Acaa1a	NM_012489	chr8:128027879-128036471	45.8161	39.5974	-0.210451	-0.550869	0.4469	0.741432	44.2447	48.0724	0.119706	0.337028	0.67045	0.816082	38.4293	35.255	-0.124377	-0.276782	0.71135	0.881291	46.1828	34.427	-0.423819	-1.01872	0.2043	0.655407
Acaa1b	NM_001040019	chr8:127836236-127845028	2.24307	2.12877	-0.0754575	-0.0526971	0.93485	0.976069	2.16525	2.29467	0.0837484	0.050925	0.93845	0.964786	2.06592	1.22497	-0.754043	-0.412479	0.55155	0.799341	2.20524	1.1959	-0.882836	-0.507463	0.47795	0.79952
Acaa2	NM_130433	chr18:70733871-70762395	23.4481	19.9852	-0.230536	-0.450313	0.5288	0.787712	22.624	3.89719	-2.53735	-2.89617	0.001	0.0114482	19.4191	11.8446	-0.713254	-1.0367	0.17225	0.533033	3.74702	11.5718	1.6268	1.52076	0.05575	0.413336
Acaca	NM_022193	chr10:71519391-71719910	15.0625	5.24849	-1.52099	-3.78279	5e-05	0.0023396	14.5363	2.60189	-2.48203	-4.67171	5e-05	0.000964063	5.09161	6.93304	0.445367	0.875046	0.21185	0.577426	2.50132	6.76977	1.43642	2.23905	0.0043	0.118414
Acacb	NM_053922	chr12:48128404-48218955	0.477717	0.19779	-1.27219	0	1	1	0.461682	0.0087523	-5.7211	0	1	1	0.191454	0.0251639	-2.92757	0	1	1	0.00843978	0.0246145	1.54423	0	1	1
Acad10	NM_001134537	chr12:40417943-40460561	6.42052	4.01128	-0.678625	-0.855106	0.2409	0.588196	6.19527	4.70029	-0.398419	-0.486538	0.47755	0.684965	3.89471	6.93865	0.833141	0.977153	0.1845	0.546564	4.52332	6.78194	0.584317	0.677254	0.31345	0.717751
Acad11	NM_001108181	chr8:112594757-112676275	1.47376	0.224133	-2.71707	-1.54344	0.026	0.18061	1.42309	1.83455	0.366395	0.344969	0.6065	0.774088	0.217125	0.423155	0.962657	0	1	1	1.761	0.412699	-2.09323	-1.29451	0.04285	0.375895
Acad9	NM_181768	chr2:122782130-122805765	26.8326	18.0482	-0.572133	-1.38758	0.0477	0.256196	25.8894	23.3857	-0.146736	-0.35893	0.60495	0.772867	17.5141	20.5814	0.232828	0.477574	0.49385	0.769792	22.4902	20.0823	-0.163374	-0.341348	0.62955	0.866418
Acadl	NM_012819	chr9:73833367-73871854	46.2439	23.718	-0.963283	-2.14236	0.0038	0.0540783	44.6278	20.7567	-1.10436	-2.27048	0.00255	0.0235754	23.0033	28.033	0.28528	0.512898	0.4621	0.7543	19.9572	27.3586	0.455087	0.773048	0.27155	0.691263
Acadm	NM_016986	chr2:259379652-260753677	27.9217	17.8993	-0.641487	-0.89139	0.20925	0.558102	26.9426	18.5496	-0.538503	-0.667326	0.3408	0.571069	17.352	18.9846	0.129721	0.165344	0.80945	0.924939	17.8155	18.5333	0.0569862	0.06729	0.9229	0.978515
Acads	NM_022512	chr12:47254502-47263747	27.6142	21.4166	-0.366678	-0.813349	0.28605	0.624526	26.6679	10.9701	-1.28152	-2.2913	0.00745	0.0522659	20.7974	20.4893	-0.0215352	-0.0388622	0.95705	0.985788	10.545	20.001	0.923517	1.38009	0.07435	0.470145
Acadsb	NM_013084	chr1:201981452-202020186	2.93805	4.01101	0.449111	0.353062	0.61595	0.835039	2.83951	0.656713	-2.11231	-1.18678	0.05915	0.221655	3.88749	0.281993	-3.78511	-1.90446	0.24255	0.607704	0.631314	0.275258	-1.19757	-0.507718	0.42665	0.775332
Acadvl	NM_012891	chr10:56619320-56624468	38.7757	27.8606	-0.476926	-1.2359	0.079	0.342402	37.4263	23.0718	-0.697923	-1.65664	0.02175	0.113121	27.0374	18.0174	-0.585568	-1.12446	0.1083	0.444442	22.1658	17.5851	-0.333983	-0.601834	0.397	0.762488
Acan	NM_022190	chr1:140762757-140824441	0.149439	0.0604387	-1.30602	0	1	1	0.14415	0.00798409	-4.1743	0	1	1	0.0584768	0.113156	0.952376	0	1	1	0.00769904	0.110673	3.84548	0	1	1
Acap1	NM_001105796	chr10:56492299-56506446	0	0	0	0	1	1	0	0	0	0	1	1	0	0	0	0	1	1	0	0	0	0	1	1
Acap2	NM_001034006	chr11:73078981-73191133	4.40908	4.86237	0.141185	0.222329	0.73945	0.897033	4.25326	8.69837	1.03218	1.70811	0.02335	0.118653	4.71726	4.22418	-0.159278	-0.216254	0.75635	0.900096	8.36179	4.12477	-1.0195	-1.51872	0.0298	0.331729
Acap3	NM_001107999	chr5:173340059-173354755	19.0112	10.5229	-0.853321	-2.35886	0.00335	0.0501771	18.3516	22.8483	0.31618	0.9878	0.19945	0.44752	10.2203	24.8724	1.2831	3.26539	5e-05	0.0020606	21.9525	24.2871	0.145806	0.440785	0.5704	0.841881
Acat1	NM_017075	chr8:58166990-58195884	43.7738	37.579	-0.220139	-0.677952	0.33115	0.659145	42.223	50.4668	0.257306	0.806453	0.2536	0.495703	36.4441	45.8091	0.32995	0.921568	0.1891	0.552113	48.5312	44.7029	-0.118545	-0.344169	0.61695	0.861758
Acat2	NM_001006995	chr1:47972398-47992654	4.45061	3.88215	-0.197147	-0.218232	0.7431	0.899125	4.29411	3.13984	-0.451665	-0.418005	0.56445	0.745733	3.76859	1.28113	-1.55661	-1.02078	0.16515	0.525009	3.01812	1.24983	-1.27192	-0.788663	0.27905	0.695555
Acbd3	NM_182843	chr13:99004941-99035520	10.5357	13.295	0.3356	0.82907	0.23025	0.578996	10.1619	12.6479	0.315729	0.745337	0.294	0.526836	12.8929	13.3314	0.0482528	0.110281	0.87305	0.951946	12.1685	13.0146	0.0969866	0.218107	0.75225	0.916306
Acbd4	NM_001012013	chr10:91187592-91196573	20.2999	24.2658	0.257454	0.565945	0.42625	0.728029	19.59	23.7674	0.278869	0.610954	0.42715	0.645037	23.5505	23.7727	0.0135447	0.0271153	0.96995	0.989555	22.8311	23.1987	0.0230437	0.0465457	0.9547	0.987667
Acbd5	NM_001077635	chr17:89884376-89923422	3.61408	2.80903	-0.363555	-0.261066	0.72685	0.890984	3.48549	3.23886	-0.105875	-0.0853303	0.9117	0.949357	2.72503	4.3027	0.658968	0.369744	0.59305	0.820894	3.11988	4.19887	0.42851	0.267532	0.7186	0.903535
Acbd6	NM_001011906	chr13:73196570-73334077	50.1983	87.9801	0.80954	2.35293	0.0018	0.032595	48.4798	88.945	0.875531	2.54423	0.00135	0.014453	85.3861	48.5752	-0.81378	-2.13889	0.0054	0.0802296	85.455	47.4285	-0.84941	-2.26577	0.00495	0.127942
Acbd7	NM_001126079	chr17:78905337-78910684	5.15536	0.820402	-2.65167	-1.16275	0.27875	0.619992	4.98474	3.46792	-0.523449	-0.27396	0.55535	0.739899	0.797809	0	#NAME?	#NAME?	0.09455	0.419611	3.3441	0	#NAME?	#NAME?	0.1252	0.551555
Accs	NM_001267534	chr3:82742829-82756953	3.19386	0.164257	-4.28127	-1.76193	0.23775	0.5849	3.08093	0.176308	-4.1272	-2.15525	0.23395	0.479307	0.159018	1.21034	2.92815	1.10736	0.26295	0.618795	0.169171	1.18337	2.80634	1.28809	0.2582	0.680036
Accsl	NM_001109594	chr3:82762861-82777814	0	0	0	0	1	1	0	0	0	0	1	1	0	0	0	0	1	1	0	0	0	0	1	1
Acd	NM_001037193	chr19:37665294-37667987	23.9016	26.6083	0.154771	0.349487	0.65425	0.854081	23.0888	21.8209	-0.0814828	-0.1728	0.82525	0.906098	25.8309	19.9427	-0.373238	-0.705728	0.3725	0.698767	20.9716	19.4833	-0.106199	-0.189616	0.8164	0.940486
Ace	NM_012544	chr10:94170765-94187822	0.645008	0.613473	-0.0723169	0	1	1	0.622765	0.164764	-1.91829	-0.999083	0.3609	0.589991	0.595552	0.04363	-3.77083	0	1	1	0.158155	0.0424866	-1.89626	0	1	1
Ace2	NM_001012006	chrX:32050733-32095860	0	0	0	0	1	1	0	0	0	0	1	1	0	0	0	0	1	1	0	0	0	0	1	1
Ace3	NM_001258237	chr10:94192580-94206274	0	0	0	0	1	1	0	0	0	0	1	1	0	0	0	0	1	1	0	0	0	0	1	1
Acer1	NM_001106875	chr9:10061977-10093588	0	0.151202	inf	0	1	1	0	0	0	0	1	1	0.147048	0	#NAME?	0	1	1	0	0	0	0	1	1
Acer2	NM_001107943	chr5:105230579-105279731	0.372768	0.0920499	-2.01779	0	1	1	0.360043	0.758742	1.07544	0.738657	0.30715	0.539757	0.0890788	0.403815	2.18054	0	1	1	0.729812	0.393502	-0.891155	-0.545507	0.43495	0.779066
Ache	NM_172009	chr12:22472357-22477052	55.7477	65.2502	0.227069	0.780923	0.293	0.628671	53.8022	20.3493	-1.40269	-4.01043	5e-05	0.000964063	63.3399	14.677	-2.10956	-4.77636	5e-05	0.0020606	19.548	14.334	-0.447575	-0.887995	0.26685	0.688569
Acin1	NM_001170468	chr15:33288371-33333256	25.2206	31.0044	0.297873	0.984156	0.1712	0.50714	24.3636	31.4188	0.3669	1.19179	0.1023	0.307346	30.087	28.1774	-0.0945994	-0.287379	0.68835	0.870459	30.1903	27.507	-0.134285	-0.409702	0.58245	0.845884
Ackr2	NM_078621	chr8:130540745-130542432	1.08153	0.69618	-0.635544	-0.390809	0.49735	0.771696	1.044	2.42956	1.21857	0.894008	0.28445	0.51836	0.677129	1.81882	1.4255	0.786602	0.48145	0.76407	2.33432	1.77703	-0.393536	-0.270059	0.70835	0.898331
Ackr3	NM_053352	chr9:97355923-97367447	2.98459	2.19724	-0.441842	-0.42573	0.56345	0.808094	2.87869	3.27088	0.184266	0.190942	0.77035	0.876183	2.13284	4.81412	1.1745	1.06566	0.14675	0.497542	3.14554	4.70558	0.581066	0.569389	0.4195	0.772354
Acly	NM_001111095	chr10:88392247-88442845	53.7189	35.7456	-0.587665	-2.10753	0.0026	0.0423604	51.8177	37.6464	-0.460935	-1.68419	0.01665	0.094522	34.6731	40.3372	0.218295	0.702791	0.3159	0.654412	36.1942	39.3866	0.121949	0.3984	0.56515	0.838661
Acly	NM_016987	chr10:88392247-88442845	1.17159	1.05519	-0.150961	-0.0549223	0.9206	0.972018	1.13889	0.00347098	-8.35807	-0.403107	0.40245	0.624807	1.02517	0.00294037	-8.44565	-0.333172	0.3813	0.706226	0.00322143	0.00276586	-0.219972	0	1	1
Acmsd	NM_134372	chr13:44424688-44468734	0	0	0	0	1	1	0	0	0	0	1	1	0	0.0685057	inf	0	1	1	0	0.0670142	inf	0	1	1
Acnat2	NM_001014063	chr5:64669997-64674250	0	0	0	0	1	1	0	0	0	0	1	1	0	0	0	0	1	1	0	0	0	0	1	1
Aco1	NM_017321	chr5:56425075-56481218	10.522	5.33048	-0.981072	-1.77377	0.01325	0.122335	10.1596	6.80027	-0.579182	-1.12129	0.1249	0.342183	5.16567	6.51783	0.335436	0.484046	0.4743	0.760418	6.53138	6.35863	-0.0386716	-0.0592636	0.9303	0.981719
Aco2	NM_024398	chr7:123102492-123145602	171.954	114.239	-0.589965	-2.44478	0.0005	0.0127429	165.998	90.7427	-0.871314	-3.72012	5e-05	0.000964063	110.832	122.845	0.14846	0.567149	0.41885	0.728242	87.2073	119.924	0.459597	1.78608	0.01435	0.236765
Acot1	NM_031315	chr6:107485087-107493080	4.48933	2.99603	-0.583446	-0.56427	0.4326	0.732883	4.33344	0.652243	-2.73203	-1.9082	0.2487	0.492235	2.90778	1.10779	-1.39223	-0.812287	0.2012	0.565866	0.625662	1.07973	0.787218	0.3902	0.60405	0.855867
Acot11	NM_001271383	chr5:126334846-126395655	0	0	0	0	1	1	0	0.010584	inf	0	1	1	0	1.07678	inf	#NAME?	0.2404	0.606733	0.0102063	1.0533	6.68932	0.943854	0.48755	0.80467
Acot12	NM_130747	chr2:20857427-20898981	0	0	0	0	1	1	0	0	0	0	1	1	0	0	0	0	1	1	0	0	0	0	1	1
Acot13	NM_001106111	chr17:42241140-42253611	88.8253	118.162	0.411726	1.08587	0.127	0.436744	85.7064	127.087	0.568339	1.45484	0.0409	0.173533	114.655	69.5197	-0.7218	-1.59658	0.02785	0.219567	122.226	67.81	-0.849983	-1.85259	0.0102	0.19761
Acot2	NM_138907	chr6:107460667-107467478	5.74731	2.00578	-1.51873	-1.66879	0.039	0.228797	5.54139	3.98561	-0.475446	-0.669475	0.35795	0.587627	1.94665	3.98237	1.03263	0.906417	0.21845	0.58422	3.83176	3.88795	0.0210039	0.0238874	0.9714	0.991809
Acot3	NM_001108041	chr6:107517667-107537446	5.11863	5.72489	0.16149	0.177309	0.8065	0.924401	4.94005	4.33808	-0.18747	-0.206198	0.7754	0.878602	5.55929	3.05477	-0.863834	-0.71589	0.3134	0.651756	4.17108	2.98389	-0.483229	-0.373587	0.5682	0.840921
Acot4	NM_001109440	chr6:107517667-107537446	4.58785	5.80784	0.340185	0.425397	0.55945	0.806642	4.42958	4.29928	-0.0430746	-0.0545415	0.934	0.961869	5.63067	3.058	-0.880719	-0.866565	0.26235	0.6185	4.13571	2.98927	-0.468346	-0.478835	0.5191	0.816031
Acot5	NM_001079709	chr6:107550903-107557688	1.95866	0.604844	-1.69523	-1.02508	0.17435	0.512191	1.88973	0	#NAME?	#NAME?	5e-05	0.000964063	0.588055	1.00068	0.766959	0.393113	0.5526	0.799922	0	0.978489	inf	#NAME?	0.02975	0.331729
Acot6	NM_001305285	chr6:107581356-107590431	0.366191	0.67589	0.884191	0.383518	0.403	0.713797	0.353472	0.952598	1.43027	0.773831	0.3245	0.556157	0.65408	0	#NAME?	#NAME?	0.10995	0.447903	0.913898	0	#NAME?	#NAME?	0.1261	0.551825
Acot7	NM_001146061	chr5:169357581-169450215	8.92452	18.0525	1.01636	0.372494	0.56695	0.809269	8.52134	94.1961	3.46652	1.19059	0.4058	0.627929	17.3517	62.8383	1.85657	0.7746	0.34465	0.676709	90.8349	61.2009	-0.569695	-0.21546	0.65835	0.877333
Acot7	NM_013214	chr5:169357581-169450215	491.505	395.483	-0.31359	-1.34193	0.07215	0.323872	474.828	219.096	-1.11585	-1.38881	0.19575	0.442922	384.141	333.508	-0.203916	-0.478192	0.47525	0.76046	210.229	325.875	0.632356	0.720845	0.38795	0.757177
Acot8	NM_130756	chr3:161260836-161287667	47.6808	36.6521	-0.379511	-0.967025	0.18245	0.523498	46.0266	29.4495	-0.644224	-1.5857	0.0429	0.179293	35.5726	28.7367	-0.307872	-0.603449	0.4039	0.720598	28.2967	28.0522	-0.0125195	-0.0240253	0.97685	0.993294
Acot9	NM_001013960	chrX:43543068-43592200	29.6753	29.5317	-0.00699872	-0.0172572	0.98035	0.991651	28.6161	32.1217	0.166724	0.411342	0.57085	0.749925	28.6535	40.5246	0.500087	1.15662	0.10575	0.441692	30.9114	39.5318	0.354875	0.850796	0.25665	0.680036
Acox1	NM_017340	chr10:104724533-104748003	4.73372	0.627339	-2.91566	-1.98911	0.01815	0.146528	4.56912	2.20839	-1.04892	-0.893781	0.2043	0.452964	0.608393	2.27401	1.90217	1.11706	0.08	0.388928	2.12141	2.22126	0.0663565	0.0476119	0.9409	0.983518
Acox2	NM_145770	chr15:18449389-18481470	0.0131077	0	#NAME?	0	1	1	0.0126278	0.546807	5.43635	0	1	1	0	0.20549	inf	0	1	1	0.52441	0.201013	-1.3834	0	1	1
Acox3	NM_053339	chr14:80314430-80355420	2.51554	2.68171	0.0922859	0.086446	0.9131	0.968681	2.4305	1.98534	-0.291865	-0.247195	0.7376	0.856976	2.607	0.415428	-2.64972	-1.55138	0.0258	0.208787	1.90689	0.405582	-2.23315	-1.29101	0.06805	0.450267
Acoxl	NM_001106508	chr3:120414394-120724809	0	0	0	0	1	1	0	0	0	0	1	1	0	0	0	0	1	1	0	0	0	0	1	1
Acp1	NM_001135562	chr6:49836064-49851714	6.89806	10.4622	0.600923	0.707742	0.3672	0.688824	6.66351	10.5659	0.665057	0.797168	0.29795	0.53075	10.156	5.28924	-0.941206	-1.01303	0.1604	0.519363	10.1518	5.16309	-0.975423	-1.04791	0.1479	0.591032
Acp1	NM_021262	chr6:49836064-49851714	11.9484	10.2585	-0.220001	-0.284425	0.6775	0.864213	11.5303	6.24732	-0.884116	-0.962986	0.16065	0.397572	9.94382	7.60157	-0.387503	-0.440836	0.53375	0.78959	6.00985	7.41975	0.304042	0.293585	0.66625	0.88003
Acp2	NM_016988	chr3:80021439-80030365	14.7669	12.8804	-0.197182	-0.382723	0.57775	0.815629	14.2385	13.3851	-0.0891662	-0.167582	0.8099	0.897397	12.4971	6.41994	-0.960964	-1.36882	0.05885	0.332906	12.8651	6.27303	-1.03623	-1.42182	0.05965	0.425273
Acp5	NM_001270889	chr8:23142732-23148396	0.374911	0.000811891	-8.85104	0	1	1	0.36137	0.000769584	-8.87518	0	1	1	0.000751796	0.000881474	0.229576	0	1	1	0.000706618	0.00082842	0.229431	0	1	1
Acp5	NM_019144	chr8:23142732-23148396	5.6944	5.99332	0.0738129	0.0763765	0.92815	0.975061	5.50178	1.8048	-1.60806	-1.05146	0.22065	0.468899	5.82018	2.70927	-1.10316	-0.707157	0.31485	0.653165	1.73529	2.64525	0.608232	0.338322	0.6507	0.874506
Acp6	NM_001031645	chr2:199284176-199305793	20.6756	12.7901	-0.692907	-1.07553	0.1303	0.442453	19.96	8.67018	-1.20298	-1.57895	0.0343	0.153825	12.4159	17.2164	0.471596	0.61471	0.3695	0.695845	8.33572	16.8011	1.01118	1.13643	0.09325	0.507305
Acpp	NM_001134901	chr8:112838628-112884062	0	0.0248027	inf	0	1	1	0	0	0	0	1	1	0.0239967	0	#NAME?	0	1	1	0	0	0	0	1	1
Acpp	NM_020072	chr8:112838628-112884062	0	0	0	0	1	1	0	0	0	0	1	1	0	0	0	0	1	1	0	0	0	0	1	1
Acpt	NM_001107510	chr1:100227577-100231460	0.0239826	0	#NAME?	0	1	1	0.0231281	0	#NAME?	0	1	1	0	0	0	0	1	1	0	0	0	0	1	1
Acr	NM_012490	chr7:130542202-130548356	0.283872	0.0693569	-2.03313	0	1	1	0.274578	0	#NAME?	0	1	1	0.0674617	0	#NAME?	0	1	1	0	0	0	0	1	1
Acrbp	NM_001025049	chr4:157563989-157568024	0	0.16055	inf	0	1	1	0	0.0164657	inf	0	1	1	0.155345	0	#NAME?	0	1	1	0.0158779	0	#NAME?	0	1	1
Acrv1	NM_021747	chr8:39164990-39170568	0	0	0	0	1	1	0	0	0	0	1	1	0	0	0	0	1	1	0	0	0	0	1	1
Acsbg1	NM_134389	chr8:59184110-59239954	46.5092	32.1597	-0.532261	-1.59813	0.0258	0.180077	44.9141	28.1093	-0.676124	-1.88877	0.00925	0.0614726	31.2102	40.1346	0.362828	0.955096	0.179	0.540709	27.0351	39.1766	0.535158	1.30932	0.065	0.44249
Acsbg2	NM_001080096	chr9:10158747-10203461	0.0134064	0	#NAME?	0	1	1	0.0129169	0	#NAME?	0	1	1	0	0	0	0	1	1	0	0	0	0	1	1
Acsf2	NM_001034951	chr10:82284718-82326771	13.8495	10.227	-0.437445	-1.04651	0.1566	0.484375	13.3666	5.09744	-1.39078	-2.70345	0.00185	0.0185047	9.92609	11.1749	0.170959	0.340068	0.63655	0.843904	4.89929	10.9115	1.1552	1.87091	0.0186	0.260761
Acsl1	NM_012820	chr16:48937455-48981980	22.3405	14.3873	-0.634862	-1.81125	0.01105	0.110481	21.5636	16.1916	-0.413352	-1.17357	0.09845	0.300242	13.9545	17.9283	0.361511	0.885195	0.20235	0.565949	15.5644	17.4937	0.16858	0.414219	0.55745	0.834948
Acsl3	NM_057107	chr9:84569599-84593565	63.4172	72.3822	0.190762	0.717056	0.318	0.648667	61.1274	55.2857	-0.144913	-0.54853	0.45675	0.668725	70.1839	54.4503	-0.366199	-1.25355	0.0741	0.373478	53.2082	53.1391	-0.00187481	-0.00643348	0.99295	0.996711
Acsl4	NM_053623	chrX:113596261-113659878	11.6601	11.0073	-0.0831287	-0.238925	0.73525	0.894968	11.2338	9.43309	-0.252048	-0.702343	0.3439	0.574212	10.6728	9.15779	-0.220874	-0.548484	0.4332	0.736137	9.07558	8.93814	-0.0220158	-0.0531441	0.9411	0.983533
Acsl5	NM_053607	chr1:276240702-276290006	16.0035	14.3565	-0.156678	-0.3322	0.64155	0.84791	15.4365	17.3134	0.165545	0.345516	0.61595	0.780942	13.9213	15.814	0.183914	0.339034	0.63265	0.841825	16.6445	15.4369	-0.108659	-0.202935	0.76745	0.922407
Acsl6	NM_130739	chr10:39666990-39715981	49.1376	34.4149	-0.513796	-1.56356	0.0287	0.190217	47.4291	40.2399	-0.237146	-0.726349	0.3041	0.536488	33.3813	40.5555	0.280857	0.747699	0.2864	0.634181	38.671	39.5843	0.0336774	0.0908089	0.8979	0.9699
Acsm1	NM_001108502	chr1:189359852-189395277	0	0	0	0	1	1	0	0	0	0	1	1	0	0	0	0	1	1	0	0	0	0	1	1
Acsm2a	NM_144748	chr1:189289956-189329007	0	0	0	0	1	1	0	0	0	0	1	1	0	0	0	0	1	1	0	0	0	0	1	1
Acsm3	NM_033231	chr1:189457581-190370515	0.741618	1.07577	0.536627	0.128983	0.85955	0.944331	0.715268	0.059056	-3.59833	-0.421964	0.50185	0.701758	1.04267	0.0718256	-3.85964	-0.413935	0.34465	0.676709	0.0569439	0.0699439	0.296655	0	1	1
Acsm4	NM_181695	chr1:189432603-189457052	0	0	0	0	1	1	0	0	0	0	1	1	0	0	0	0	1	1	0	0	0	0	1	1
Acsm5	NM_001014162	chr1:189241592-189267915	0.0819106	0.747361	3.18968	1.15729	0.23305	0.58141	0.0788876	0.933312	3.56449	1.28419	0.2256	0.472205	0.725016	0.869606	0.26235	0.141602	0.82205	0.930651	0.89623	0.850408	-0.0757139	-0.0405404	0.49725	0.808206
Acss1	NM_001106524	chr3:146420345-146470293	13.4319	9.90155	-0.439933	-1.00888	0.1491	0.472419	12.9629	5.13315	-1.33647	-2.50501	0.0008	0.00967843	9.6031	11.5678	0.268539	0.531413	0.443	0.741917	4.93504	11.2965	1.19474	1.94324	0.00925	0.185417
Acss2	NM_001107793	chr3:151032951-151075856	15.7971	13.9584	-0.178527	-0.406575	0.55685	0.805594	15.2458	16.5058	0.114565	0.259365	0.7135	0.843241	13.5338	17.8746	0.401347	0.825017	0.23645	0.602745	15.873	17.4473	0.136423	0.281323	0.6858	0.889124
Acss3	NM_001108091	chr7:49074595-49250953	0.00988871	0.0206295	1.06086	0	1	1	0.00956411	0	#NAME?	0	1	1	0.020005	0.325282	4.02326	0	1	1	0	0.318232	inf	0	1	1
Acta1	NM_019212	chr19:56674071-56677084	34.828	48.6543	0.48232	1.13104	0.1044	0.400548	33.6292	35.8629	0.0927775	0.199638	0.781	0.881284	47.2124	31.3219	-0.591991	-1.21663	0.0935	0.417237	34.4832	30.5771	-0.173441	-0.335126	0.6398	0.870298
Acta2	NM_031004	chr1:252537613-252550394	0.532857	0.896437	0.750453	0.360395	0.42055	0.724605	0.514524	0.269339	-0.933816	0	1	1	0.870042	0.261498	-1.73429	-0.722752	0.29385	0.638326	0.258478	0.255121	-0.0188585	0	1	1
Actb	NM_031144	chr12:13715842-13718813	1306.89	1110.67	-0.234705	-1.03304	0.14835	0.471192	1262.12	712.886	-0.824101	-4.04014	5e-05	0.000964063	1078	862.893	-0.3211	-1.34559	0.06425	0.346599	685.089	842.363	0.298151	1.36442	0.06555	0.443104
Actbl2	NM_001106409	chr2:42829412-42832160	0	0	0	0	1	1	0	0	0	0	1	1	0	0	0	0	1	1	0	0	0	0	1	1
Actc1	NM_019183	chr3:105507402-105512939	0	0.313233	inf	0	1	1	0	0	0	0	1	1	0.304664	0.0929952	-1.71199	0	1	1	0	0.0909673	inf	0	1	1
Actg1	NM_001127449	chr10:109518432-109521288	111.151	109.625	-0.019934	-0.0746022	0.9158	0.969892	107.265	65.7258	-0.70665	-2.46335	0.00075	0.0091873	106.381	74.7883	-0.50835	-1.67087	0.02045	0.182625	63.1882	73.0062	0.208362	0.632883	0.37675	0.752458
Actg1	NM_001127449_1	chr3:75643053-75644956	0.708786	0.898729	0.342536	0.188925	0.78985	0.916179	0.68402	0.369579	-0.888155	-0.445548	0.2832	0.517379	0.872203	0.772151	-0.17578	-0.0931262	0.8859	0.956247	0.355252	0.753468	1.08471	0.515695	0.36775	0.748179
Actg2	NM_012893	chr4:115215159-115229684	0.798815	0.0950299	-3.07141	-1.05087	0.51215	0.778931	0.772687	0.443891	-0.799679	-0.312628	0.7318	0.853451	0.0919485	0.310337	1.75494	0	1	1	0.428044	0.303567	-0.495745	0	1	1
Actl11	NM_001024788	chr8:116708026-116711716	0	0	0	0	1	1	0	0	0	0	1	1	0	0	0	0	1	1	0	0	0	0	1	1
Actl6a	NM_001039033	chr2:119112775-119139451	8.87285	6.88336	-0.366284	-0.367627	0.59325	0.823817	8.55735	6.5405	-0.387763	-0.380289	0.613	0.778654	6.68385	3.98411	-0.746421	-0.523861	0.4896	0.768181	6.30154	3.88382	-0.698228	-0.465619	0.57315	0.842827
Actl6b	NM_001105917	chr12:22194598-22211080	135.582	107.181	-0.339121	-1.184	0.0961	0.382764	130.9	66.3121	-0.981119	-3.20298	5e-05	0.000964063	104.015	93.6546	-0.151365	-0.462776	0.5164	0.780733	63.7193	91.4235	0.520835	1.47367	0.04605	0.385952
Actl7a	NM_001011973	chr5:73496074-73497550	0	0	0	0	1	1	0	0	0	0	1	1	0	0	0	0	1	1	0	0	0	0	1	1
Actl7b	NM_001025417	chr5:73492641-73494030	0	0	0	0	1	1	0	0	0	0	1	1	0	0	0	0	1	1	0	0	0	0	1	1
Actl9	NM_001108077	chr7:18310623-18312001	0	0	0	0	1	1	0	0	0	0	1	1	0	0	0	0	1	1	0	0	0	0	1	1
Actl9b	NM_001013893	chr8:4085835-4087173	0	0	0	0	1	1	0	0	0	0	1	1	0	0	0	0	1	1	0	0	0	0	1	1
Actn1	NM_031005	chr6:103376556-103470497	57.003	17.7533	-1.68295	-4.35969	5e-05	0.0023396	55.0382	6.13438	-3.16544	-5.49102	5e-05	0.000964063	17.2149	37.1221	1.10862	2.44515	0.00115	0.0261451	5.89657	36.2505	2.62005	3.80892	5e-05	0.00359193
Actn2	NM_001170325	chr17:66304530-66397647	83.1342	23.2877	-1.83587	-5.22693	5e-05	0.0023396	80.2741	2.67363	-4.90806	-5.38066	5e-05	0.000964063	22.5867	18.05	-0.323474	-0.659642	0.3517	0.6811	2.5747	17.6249	2.77514	2.41842	0.0078	0.166448
Actn3	NM_133424	chr1:220120531-220136460	0.34723	0	#NAME?	0	1	1	0.334739	0	#NAME?	0	1	1	0	0	0	0	1	1	0	0	0	0	1	1
Actn4	NM_031675	chr1:87066288-87147308	150.61	53.3645	-1.49686	-5.66781	5e-05	0.0023396	145.395	40.2164	-1.85412	-7.31594	5e-05	0.000964063	51.7463	176.792	1.77253	6.29814	5e-05	0.0020606	38.6498	172.621	2.15907	8.00881	5e-05	0.00359193
Actr10	NM_001009602	chr6:93385456-93411591	107.187	77.7044	-0.464064	-1.5584	0.0279	0.18682	103.377	53.2442	-0.957224	-2.9095	5e-05	0.000964063	75.3573	73.6937	-0.0322055	-0.0930135	0.8951	0.959077	51.1759	71.9177	0.490882	1.29126	0.06665	0.446883
Actr1a	NM_001106364	chr1:266123869-266142538	123.694	93.8193	-0.398821	-1.58662	0.02355	0.170054	119.357	107.106	-0.156248	-0.644564	0.36525	0.593624	91.0362	119.099	0.387648	1.43309	0.04565	0.287792	102.969	116.301	0.175651	0.672965	0.34755	0.737725
Actr1b	NM_001039028	chr9:43267052-43276717	109.164	88.8154	-0.297612	-1.22871	0.08875	0.366414	105.367	107.32	0.0264963	0.115267	0.87595	0.932676	86.1949	116.846	0.438928	1.69662	0.02045	0.182625	103.159	114.094	0.145348	0.594425	0.42245	0.773405
Actr2	NM_001009268	chr14:104340799-104375648	233.364	133.323	-0.80766	-2.98539	5e-05	0.0023396	225.04	90.3527	-1.31654	-4.56706	5e-05	0.000964063	129.308	135.132	0.0635547	0.203857	0.77595	0.90959	86.928	131.798	0.600433	1.79733	0.0141	0.235326
Actr3	NM_031068	chr13:40898437-41836153	78.9688	50.4954	-0.645131	-2.1832	0.0023	0.0392207	76.1746	39.456	-0.949064	-3.06397	5e-05	0.000964063	48.9563	49.5365	0.0169968	0.0491378	0.94225	0.98015	37.9656	48.3528	0.348905	0.956242	0.18155	0.63571
Actr3b	NM_001191860	chr4:5644285-5672708	74.387	45.7494	-0.701298	-1.73414	0.01495	0.131	71.7813	27.8389	-1.36651	-2.91241	0.0004	0.00549087	44.3725	39.4249	-0.170559	-0.334792	0.6289	0.840281	26.758	38.5137	0.5254	0.903396	0.1896	0.642123
Actr5	NM_001108600	chr3:155118587-155132073	4.32966	4.8193	0.15457	0.196099	0.7787	0.910877	4.17925	2.32503	-0.845993	-0.830869	0.24735	0.490889	4.67696	5.72923	0.292771	0.347293	0.6238	0.836991	2.2359	5.59232	1.32259	1.12569	0.12715	0.553696
Actr6	NM_001108081	chr7:30377368-30397922	26.8607	21.1517	-0.344722	-0.815951	0.25675	0.600812	25.8921	16.5437	-0.646226	-1.42778	0.05255	0.204938	20.5034	19.6772	-0.0593337	-0.117727	0.87175	0.951274	15.9186	19.2007	0.270443	0.514256	0.48715	0.80467
Actr8	NM_001309459	chr16:6048019-6062586	39.3276	33.3477	-0.237956	-0.644174	0.35165	0.67566	37.962	29.2395	-0.376638	-0.959666	0.16795	0.406709	32.3289	38.0364	0.234555	0.56627	0.41075	0.723434	28.1259	37.1228	0.400408	0.921318	0.1918	0.644756
Actrt1	NM_001013961	chrX:133227698-133229052	0	0	0	0	1	1	0	0	0	0	1	1	0	0	0	0	1	1	0	0	0	0	1	1
Actrt2	NM_001013937	chr5:172077289-172078690	0	0	0	0	1	1	0	0	0	0	1	1	0	0.681328	inf	0	1	1	0	0.666457	inf	#NAME?	0.1094	0.53715
Actrt3	NM_001108942	chr2:116416560-116418521	0.431287	0	#NAME?	0	1	1	0.415416	0	#NAME?	0	1	1	0	1.88692	inf	#NAME?	5e-05	0.0020606	0	1.83746	inf	#NAME?	0.02705	0.317625
Acvr1	NM_024486	chr3:44433522-44500986	2.04654	2.00641	-0.0285716	-0.0206254	0.97575	0.990362	1.972	0.552438	-1.83577	-0.799757	0.35495	0.584914	1.94801	0.292253	-2.73671	-1.11543	0.28705	0.634501	0.532625	0.285891	-0.897653	-0.313237	0.72615	0.905933
Acvr1b	NM_199230	chr7:142817173-142858365	1.32065	1.16119	-0.185649	-0.124818	0.8385	0.937293	1.27381	0.591719	-1.10617	-0.521869	0.4243	0.643297	1.12592	2.03792	0.855991	0.531846	0.4482	0.744961	0.569647	1.99016	1.80474	0.972897	0.08255	0.488375
Acvr1c	NM_139090	chr3:44272858-44342501	4.4035	2.71531	-0.697534	-0.65805	0.33255	0.660233	4.24437	2.08856	-1.02304	-0.912224	0.22945	0.475089	2.63254	2.06948	-0.347189	-0.242211	0.719	0.883821	2.00509	2.01649	0.00817543	0.0048571	0.9949	0.997574
Acvr2a	NM_031571	chr3:32947972-33032649	4.48251	2.41564	-0.891903	-0.994955	0.14715	0.469419	4.32615	0.669081	-2.69283	-2.14262	0.02515	0.125195	2.34105	1.97468	-0.245533	-0.206261	0.7702	0.907142	0.644353	1.92413	1.57828	1.05094	0.1396	0.577473
Acvr2b	NM_031554	chr8:128087344-128118754	47.859	23.5233	-1.0247	-2.37176	0.00165	0.0307352	46.2058	28.3124	-0.706639	-1.82419	0.0227	0.116308	22.8257	52.1406	1.19174	2.50987	0.0015	0.0317505	27.201	50.9252	0.904721	2.16883	0.01315	0.228025
Acvrl1	NM_022441	chr7:142776251-142787336	2.31277	0.926265	-1.32013	-1.16521	0.1226	0.430425	2.23524	0.939327	-1.25073	-0.937532	0.1817	0.424128	0.898322	2.87301	1.67726	1.04487	0.14355	0.492564	0.904792	2.8023	1.63095	0.870633	0.16525	0.614362
Acy1	NM_001005383	chr8:115134795-115139479	54.6949	25.913	-1.07773	-2.38596	0.00165	0.0307352	52.7889	25.3884	-1.05607	-2.18294	0.00275	0.0248944	25.1439	35.7373	0.507223	0.921868	0.19835	0.563546	24.4316	34.8985	0.514417	0.880942	0.2041	0.655407
Acy3	NM_001009603	chr1:219233773-219237100	0.935835	1.98776	1.08682	0.632771	0.3013	0.63667	0.903061	0.378723	-1.25368	-0.527193	0.4897	0.692742	1.92876	1.03871	-0.892875	-0.434981	0.58915	0.819177	0.363322	1.01605	1.48365	0.57087	0.64605	0.872209
Acyp1	NM_001106746	chr6:109097064-109104050	28.4359	28.9272	0.0247124	0.0311599	0.96615	0.986559	27.4225	33.4654	0.287313	0.314485	0.6541	0.805972	28.0609	19.2649	-0.542585	-0.486893	0.4817	0.764081	32.1809	18.7888	-0.776331	-0.646399	0.3567	0.742815
Acyp1	NM_001199167	chr6:109097064-109104050	78.5828	95.7394	0.284899	0.603422	0.391	0.70509	75.8215	206.702	1.44687	3.28755	5e-05	0.000964063	92.8567	120.825	0.379839	0.773911	0.2624	0.6185	198.856	117.952	-0.753526	-1.73527	0.0149	0.240353
Acyp1	NM_001199168	chr6:109097064-109104050	0.00182396	19.9819	13.4193	0.120234	0.08165	0.348555	0.00169369	33.1182	14.2552	0.126081	0.1419	0.369747	19.3731	20.1489	0.0566452	0.0457144	0.949	0.982924	31.9224	19.6569	-0.69953	-0.468081	0.56165	0.836331
Acyp2	NM_001169145	chr14:114891244-115052450	92.5016	145.772	0.656162	2.41324	0.0013	0.0260401	89.0995	159.933	0.843978	3.22423	5e-05	0.000964063	141.371	108.959	-0.3757	-1.32912	0.0611	0.337802	153.891	106.294	-0.533854	-1.9999	0.0076	0.16461
Ada	NM_130399	chr3:160115839-160139947	0.838899	1.30796	0.640752	0.321872	0.57495	0.814356	0.809533	5.63437	2.79909	1.65572	0.0277	0.133303	1.27202	3.57367	1.49029	0.75863	0.4291	0.733467	5.4116	3.49241	-0.631835	-0.424463	0.57955	0.845034
Adad1	NM_001006977	chr2:123790980-123824819	0	0	0	0	1	1	0	0	0	0	1	1	0	0	0	0	1	1	0	0	0	0	1	1
Adal	NM_001014047	chr3:113102089-113108675	1.02514	0.0422611	-4.60034	-1.77637	0.2145	0.562479	0.989013	0.164326	-2.58943	-1.17134	0.31715	0.54918	0.0409555	0.0638351	0.640295	0	1	1	0.158341	0.0621622	-1.34892	0	1	1
Adam10	NM_019254	chr8:77107535-77237483	2.82699	3.18649	0.172698	0.239072	0.7419	0.898761	2.72387	2.8967	0.0887522	0.115377	0.87765	0.933437	3.08899	2.94119	-0.0707338	-0.0841744	0.89635	0.9595	2.78644	2.87341	0.0443367	0.0506198	0.9408	0.983518
Adam11	NM_001108300	chr10:90731864-90746936	1.43194	0.611964	-1.22646	-0.720551	0.2578	0.602288	1.38261	2.21465	0.679688	0.412757	0.52305	0.716977	0.59304	2.44234	2.04206	1.11782	0.0715	0.365908	2.13062	2.38432	0.162307	0.120512	0.86505	0.956311
Adam15	NM_020308	chr2:188661832-188672297	16.9298	11.8423	-0.515616	-1.27517	0.08775	0.363363	16.3475	13.0329	-0.326905	-0.817853	0.29615	0.529152	11.4951	14.7398	0.358696	0.755688	0.31115	0.649766	12.5269	14.3949	0.200526	0.433664	0.575	0.84311
Adam17	NM_020306	chr6:43400520-43448280	3.91405	2.81053	-0.477821	-0.713134	0.29535	0.631166	3.77781	1.64882	-1.19612	-1.42241	0.0557	0.213738	2.72637	0.82429	-1.72576	-1.44762	0.0303	0.228583	1.58867	0.806312	-0.978413	-0.605205	0.37115	0.748774
Adam19	NM_001160228	chr10:31146106-31240581	1.37707	1.29156	-0.0924783	-0.110794	0.87645	0.953475	1.32955	1.42739	0.102448	0.122851	0.86425	0.926945	1.25372	1.97216	0.653557	0.746936	0.26755	0.621601	1.37238	1.92421	0.487585	0.543543	0.4419	0.780718
Adam1a	NM_020078	chr12:40533730-40536632	1.90663	0.748225	-1.34948	-0.82869	0.22485	0.573804	1.84148	2.24173	0.283744	0.237181	0.7542	0.865963	0.72525	3.07742	2.08517	1.38072	0.0652	0.349729	2.15272	3.00721	0.482263	0.42633	0.5885	0.848668
Adam2	NM_020077	chr15:42708535-42751281	0	0	0	0	1	1	0	0	0	0	1	1	0	0	0	0	1	1	0	0	0	0	1	1
Adam23	NM_001029899	chr9:70133968-70290117	11.5021	10.6385	-0.112596	-0.217482	0.7576	0.904641	11.1019	7.18656	-0.627437	-1.13271	0.12855	0.347874	10.3173	8.19137	-0.332892	-0.537635	0.42925	0.73353	6.90533	7.99648	0.211655	0.320023	0.6579	0.877333
Adam26a	NM_001169119	chr16:51792059-51795355	0	0	0	0	1	1	0	0	0	0	1	1	0	0	0	0	1	1	0	0	0	0	1	1
Adam28	NM_181693	chr15:50358191-50425900	0	0	0	0	1	1	0	0	0	0	1	1	0	0	0	0	1	1	0	0	0	0	1	1
Adam30	NM_001109600	chr2:200328497-200331938	0	0	0	0	1	1	0	0	0	0	1	1	0	0	0	0	1	1	0	0	0	0	1	1
Adam32	NM_001170582	chr16:71889443-71999151	0.649901	0	#NAME?	0	1	1	0.62525	0	#NAME?	0	1	1	0	0	0	0	1	1	0	0	0	0	1	1
Adam34	NM_001135090	chr16:51750789-51752939	0	0	0	0	1	1	0	0	0	0	1	1	0	0	0	0	1	1	0	0	0	0	1	1
Adam3a	NM_020302	chr16:72086877-72136685	0	0	0	0	1	1	0	0	0	0	1	1	0	0	0	0	1	1	0	0	0	0	1	1
Adam4	NM_020305	chr6:105158023-105160470	0	0	0	0	1	1	0	0.950491	inf	#NAME?	0.0001	0.00170145	0	0	0	0	1	1	0.916584	0	#NAME?	#NAME?	5e-05	0.00359193
Adam4l1	NM_001109277	chr6:104891024-105097054	0.0543738	0	#NAME?	0	1	1	0.0522958	0.255692	2.28964	0	1	1	0	0	0	0	1	1	0.246319	0	#NAME?	0	1	1
Adam5	NM_020303	chr16:72010125-72077907	0	0	0	0	1	1	0	0	0	0	1	1	0	0	0	0	1	1	0	0	0	0	1	1
Adam6	NM_138906	chr6:138432549-138435037	0	0	0	0	1	1	0	0	0	0	1	1	0	0	0	0	1	1	0	0	0	0	1	1
Adam7	NM_020301	chr15:49418945-49467174	0	0	0	0	1	1	0	0	0	0	1	1	0	0	0	0	1	1	0	0	0	0	1	1
Adam9	NM_001014772	chr16:71810376-71887926	1.75771	2.12636	0.274687	0.259443	0.7165	0.885444	1.69476	0.698515	-1.27872	-0.813999	0.23655	0.482023	2.06513	0.766549	-1.42979	-0.964453	0.1513	0.504431	0.672472	0.74652	0.150707	0.0831208	0.90025	0.970264
Adamdec1	NM_001106046	chr15:49485610-49505553	0	0	0	0	1	1	0	0	0	0	1	1	0	0	0	0	1	1	0	0	0	0	1	1
Adamts1	NM_024400	chr11:25342118-25350938	0.254805	0.368932	0.533965	0	1	1	0.246124	1.38184	2.48913	1.59634	0.0247	0.123637	0.356982	0.0386185	-3.20849	0	1	1	1.32941	0.0376608	-5.14158	-2.28481	0.24885	0.679537
Adamts10	NM_001271445	chr7:18409146-18439012	0.899829	2.32843	1.37164	1.19226	0.11485	0.41815	0.868646	0.773164	-0.167995	-0.118982	0.8817	0.935823	2.26086	0.341304	-2.72774	-1.4528	0.0149	0.152304	0.742321	0.332517	-1.15862	0	1	1
Adamts12	NM_001106420	chr2:61039071-61340687	0.0322923	0.011349	-1.50862	0	1	1	0.0312576	0.0560147	0.841597	0	1	1	0.0110077	0.0896868	3.02639	0	1	1	0.0537161	0.0876579	0.706531	0	1	1
Adamts14	NM_001107636	chr20:30813655-30888751	0	0	0	0	1	1	0	0	0	0	1	1	0	0	0	0	1	1	0	0	0	0	1	1
Adamts15	NM_001106810	chr8:31977000-32000378	0.475903	0.637377	0.421479	0.326017	0.618	0.835958	0.459259	0.618864	0.430314	0.301451	0.64985	0.802822	0.617945	0.824961	0.416846	0.2983	0.66435	0.857938	0.595342	0.80537	0.435933	0.316067	0.6374	0.870178
Adamts18	NM_001191944	chr19:46005068-46167912	0.230858	0.276304	0.259253	0	1	1	0.222465	0	#NAME?	0	1	1	0.26873	0.193182	-0.4762	0	1	1	0	0.188117	inf	0	1	1
Adamts19	NM_001108433	chr18:53915806-54099120	0.055481	0.140275	1.33819	0	1	1	0.053552	0.010816	-2.30778	0	1	1	0.135914	0.00697225	-4.28492	0	1	1	0.0104298	0.00682045	-0.612771	0	1	1
Adamts2	NM_001137622	chr10:36098050-36301775	0.44846	0.689575	0.620727	0	1	1	0.432914	1.17388	1.43914	0.906695	0.2947	0.527607	0.670366	0.446289	-0.586971	0	1	1	1.12627	0.436409	-1.36781	-0.987106	0.4036	0.7645
Adamts3	NM_001107212	chr14:19866407-20071001	3.10143	2.21436	-0.486044	-0.639299	0.363	0.68512	2.99556	1.1064	-1.43695	-1.4442	0.08915	0.283765	2.14784	1.93786	-0.148422	-0.151472	0.83145	0.93458	1.06194	1.89285	0.833856	0.73592	0.32485	0.725471
Adamts4	NM_023959	chr13:89622995-89632485	8.97057	5.16393	-0.796731	-1.58522	0.05455	0.277929	8.65979	7.20046	-0.266243	-0.563442	0.4721	0.680407	5.01551	6.30871	0.330949	0.54353	0.4745	0.760418	6.92114	6.16182	-0.167653	-0.291058	0.70815	0.898331
Adamts5	NM_198761	chr11:25411173-25456633	0.665372	0.392299	-0.762206	0	1	1	0.643166	0.450199	-0.514629	0	1	1	0.379882	0.00849162	-5.48337	0	1	1	0.433792	0.00826898	-5.71315	0	1	1
Adamts7	NM_001047101	chr8:97535776-97575655	0.256546	0	#NAME?	0	1	1	0.247787	0.0981812	-1.33558	0	1	1	0	0.011067	inf	0	1	1	0.0946438	0.0107771	-3.13454	0	1	1
Adamts9	NM_001107877	chr4:124660261-124858250	0.288507	0.249556	-0.209245	0	1	1	0.278636	0.245855	-0.180574	0	1	1	0.241906	0.2838	0.230428	0	1	1	0.236296	0.276373	0.226023	0	1	1
Adamtsl3	NM_001107533	chr1:144238957-144561065	0.324955	0.276591	-0.232482	0	1	1	0.314063	0.202451	-0.633483	0	1	1	0.268742	0.528735	0.976324	0	1	1	0.194507	0.516057	1.40771	0	1	1
Adamtsl4	NM_001034012	chr2:197803575-197814808	0.675706	0.00851406	-6.3104	-1.64365	0.25155	0.598096	0.651931	0.056467	-3.52924	-1.17618	0.2459	0.489587	0.0082383	0.0393174	2.25475	0	1	1	0.0544515	0.0383224	-0.506784	0	1	1
Adamtsl5	NM_001108071	chr7:12229378-12234576	1.15709	0.325311	-1.83062	-0.66216	0.37075	0.690687	1.11669	1.17577	0.0743671	0.0338476	0.9509	0.971502	0.314788	2.13367	2.76088	1.01998	0.26315	0.618848	1.1338	2.08552	0.879235	0.404212	0.24785	0.679537
Adap1	NM_133567	chr12:17416326-17468212	25.3773	22.855	-0.151026	-0.401615	0.58745	0.821096	24.4989	54.7038	1.15892	3.3984	0.0001	0.00170145	22.1919	54.4357	1.29452	3.4169	5e-05	0.0020606	52.5724	53.1577	0.0159719	0.0505102	0.94865	0.986322
Adap2	NM_020101	chr10:67494932-67527036	1.42688	2.04043	0.516009	0.318413	0.6454	0.849256	1.37859	3.56494	1.37069	0.904663	0.1873	0.430871	1.98274	4.09588	1.04668	0.718829	0.31365	0.651835	3.43599	4.00343	0.22051	0.167847	0.8029	0.936487
Adar	NM_031006	chr2:189062442-189083236	3.91993	4.22436	0.107907	0.158429	0.8201	0.929305	3.78631	3.15323	-0.263958	-0.325818	0.6373	0.794879	4.10024	4.65682	0.183639	0.235365	0.74145	0.894972	3.03393	4.54349	0.582614	0.669394	0.2968	0.707896
Adarb1	NM_001111055	chr20:11972380-12101022	13.6875	12.9698	-0.0777061	-0.165551	0.8141	0.927378	13.2189	14.6127	0.144627	0.164964	0.7735	0.877806	12.5854	10.8843	-0.209507	-0.229361	0.67615	0.864805	14.0206	10.6342	-0.39883	-0.340129	0.6663	0.88003
Adarb1	NM_001111056	chr20:11972380-12101022	6.09187	4.50628	-0.434949	-0.583423	0.42315	0.726127	5.87919	5.07225	-0.212992	-0.195158	0.7474	0.862012	4.37484	7.46492	0.770897	0.712735	0.3359	0.670732	4.88249	7.2774	0.575808	0.430441	0.55	0.83024
Adarb1	NM_001111057	chr20:11972380-12101022	9.58828	7.87213	-0.284517	-0.30361	0.58605	0.820049	9.2521	4.23361	-1.12789	-1.23333	0.1813	0.423733	7.62873	4.79951	-0.668554	-0.640352	0.34265	0.675724	4.06129	4.68338	0.205611	0.199996	0.78935	0.931093
Adarb1	NM_012894	chr20:11972380-12101022	8.47662	9.84939	0.216545	0.257704	0.69035	0.870885	8.18726	15.3151	0.903498	1.13312	0.1179	0.332485	9.57304	12.3568	0.368253	0.423958	0.5387	0.793364	14.7388	12.055	-0.289982	-0.350996	0.58095	0.845191
Adarb2	NM_133302	chr17:58104601-58653137	1.3061	0.593642	-1.1376	-0.759513	0.2897	0.62688	1.26267	0.198807	-2.66704	-1.25352	0.25685	0.497879	0.576786	0.225215	-1.35674	0	1	1	0.191253	0.219542	0.199018	0	1	1
Adat1	NM_001109611	chr19:44187516-44211242	0.818237	0.905715	0.146539	0.107899	0.8698	0.950435	0.79028	0.677967	-0.221148	-0.12228	0.87125	0.930401	0.879654	0.440465	-0.99791	-0.554499	0.43635	0.738195	0.651206	0.429982	-0.598835	-0.331691	0.61785	0.861943
Adat2	NM_001115028	chr1:7726446-7743112	10.8496	11.8025	0.121446	0.168121	0.8167	0.928688	10.4785	11.1557	0.0903578	0.116126	0.87475	0.931928	11.451	8.23004	-0.476498	-0.517558	0.45195	0.747249	10.7284	8.03024	-0.417915	-0.437302	0.52855	0.822048
Adat3	NM_001103361	chr7:11969719-11982141	2.95236	7.91234	1.42224	1.14762	0.18825	0.530409	2.85087	5.78791	1.02164	0.91414	0.4159	0.63682	7.68699	6.92019	-0.151607	-0.14242	0.89025	0.957487	5.55636	6.7646	0.283864	0.30805	0.8593	0.955273
Adck1	NM_001108985	chr6:111642410-111740481	6.07397	3.09423	-0.97306	-1.03626	0.16975	0.505533	5.86411	1.61525	-1.86015	-1.6035	0.0271	0.131278	3.00555	6.22211	1.04977	0.974909	0.2026	0.56597	1.55442	6.08376	1.96859	1.2689	0.0953	0.51006
Adck2	NM_001107855	chr4:67359530-67372416	2.34533	0.877832	-1.41777	-0.812913	0.2004	0.547473	2.26169	2.98585	0.400742	0.372272	0.59435	0.766911	0.850777	4.53381	2.41387	1.60797	0.04155	0.273629	2.86815	4.42489	0.625521	0.658548	0.3552	0.742037
Adck3	NM_001013185	chr13:98451636-98478327	29.6698	21.067	-0.494012	-1.25562	0.07845	0.341155	28.645	20.7376	-0.466035	-1.15011	0.11155	0.324009	20.4479	32.8715	0.684884	1.55889	0.02885	0.223425	19.9266	32.0903	0.687441	1.5397	0.0405	0.369419
Adck4	NM_001012065	chr1:84044550-84067066	18.2316	8.82941	-1.04605	-1.96309	0.01635	0.138496	17.6026	4.2362	-2.05495	-2.80874	0.0011	0.0122696	8.57596	13.616	0.666937	1.03196	0.1515	0.504431	4.07477	13.2944	1.70603	1.81862	0.02375	0.294419
Adck5	NM_001135798	chr7:117643975-117672373	20.8693	14.886	-0.487428	-0.87334	0.24615	0.592967	20.1498	10.3366	-0.962999	-1.55758	0.0419	0.176498	14.4533	14.9125	0.0451199	0.0674898	0.9212	0.971477	9.93269	14.5617	0.551924	0.751921	0.3088	0.714745
Adcy1	NM_001107239	chr14:87312229-87421461	3.45658	2.27747	-0.601916	-0.652467	0.3426	0.668039	3.33754	5.62581	0.753275	1.01892	0.1659	0.404082	2.20859	10.2826	2.21901	2.45913	0.0042	0.0668276	5.40595	10.0409	0.893273	1.37631	0.08305	0.489082
Adcy10	NM_021684	chr13:83704138-83787002	0.105454	0	#NAME?	0	1	1	0.101496	0.0974433	-0.0587944	0	1	1	0	0.0423173	inf	0	1	1	0.0934921	0.041375	-1.17609	0	1	1
Adcy2	NM_031007	chr1:37043072-37698390	32.2397	28.2809	-0.189007	-0.615359	0.37085	0.690687	31.105	33.9395	0.125822	0.412575	0.55545	0.73993	27.4311	36.1654	0.398799	1.20252	0.0909	0.411942	32.6332	35.3148	0.113934	0.352081	0.6206	0.863382
Adcy3	NM_130779	chr6:28571132-28648848	13.0954	12.3507	-0.084463	-0.220819	0.76265	0.905761	12.6423	6.6833	-0.919628	-2.12088	0.00825	0.0563278	11.9837	7.74111	-0.630465	-1.3055	0.0667	0.353762	6.42211	7.55632	0.234637	0.436415	0.55725	0.834948
Adcy4	NM_019285	chr15:34453920-34469742	0.133802	0	#NAME?	0	1	1	0.129046	0	#NAME?	0	1	1	0	0.127699	inf	0	1	1	0	0.124352	inf	0	1	1
Adcy5	NM_022600	chr11:68695838-68842320	35.955	29.6666	-0.277354	-0.992396	0.1804	0.520039	34.7132	9.41058	-1.88313	-5.25701	5e-05	0.000964063	28.8078	25.145	-0.19619	-0.622941	0.4235	0.731052	9.04755	24.5617	1.44081	3.53145	5e-05	0.00359193
Adcy6	NM_001270785	chr7:140270691-140291620	2.17702	2.87483	0.401126	0.248241	0.55905	0.806642	2.09821	6.17732	1.55782	0.980113	0.2216	0.469047	2.78771	4.14878	0.573606	0.848611	0.22145	0.588193	5.93142	4.05455	-0.548834	-1.04322	0.19295	0.644931
Adcy6	NM_012821	chr7:140270691-140291620	2.31419	0.0242419	-6.57686	-1.50832	0.41795	0.722396	2.2354	0.131029	-4.09258	-1.77995	0.47135	0.679827	0.0225969	0.0505584	1.16182	0	1	1	0.126216	0.0473911	-1.41321	0	1	1
Adcy7	NM_053396	chr19:19704858-19727081	0.16998	0.889957	2.38837	1.27948	0.1165	0.420363	0.163991	0.186446	0.185138	0	1	1	0.865635	0.0222867	-5.27951	-1.84019	0.23925	0.605681	0.179791	0.021801	-3.04385	0	1	1
Adcy8	NM_017142	chr7:105353898-105592804	3.48637	2.83242	-0.299692	-0.42261	0.549	0.801146	3.3625	4.64539	0.466266	0.715949	0.30065	0.533937	2.75028	3.63684	0.403109	0.507017	0.49125	0.769054	4.4612	3.54998	-0.329622	-0.452576	0.5398	0.825771
Adcyap1	NM_016989	chr9:121707925-121713124	4.79462	2.55298	-0.909232	-0.752698	0.3027	0.637757	4.62813	4.19753	-0.140887	-0.151695	0.83155	0.910216	2.47643	2.61543	0.0787846	0.0582557	0.9313	0.9756	4.03031	2.55557	-0.657246	-0.545001	0.41465	0.769398
Adcyap1r1	NM_001270579	chr4:85662891-85711696	0	0.896571	inf	#NAME?	0.1843	0.526353	0	0	0	0	1	1	0.867701	0	#NAME?	#NAME?	0.17885	0.540709	0	0	0	0	1	1
Adcyap1r1	NM_001270580	chr4:85662891-85711696	0	0	0	0	1	1	0	0	0	0	1	1	0	0	0	0	1	1	0	0	0	0	1	1
Adcyap1r1	NM_001270581	chr4:85662891-85711696	0.407005	0.202367	-1.00807	0	1	1	0.393926	6.82412e-05	-12.495	0	1	1	0.195775	0.00026902	-9.50727	0	1	1	6.3533e-05	0.000253772	1.99795	0	1	1
Adcyap1r1	NM_001270582	chr4:85662891-85711696	6.20178	10.6538	0.780619	1.0992	0.1299	0.441992	5.96667	8.36166	0.486862	0.676137	0.26955	0.50747	10.3426	11.7313	0.181763	0.482728	0.5051	0.775846	8.03735	11.4569	0.511421	1.29515	0.07605	0.472392
Adcyap1r1	NM_001270583	chr4:85662891-85711696	0.00868596	0.0150518	0.793179	0	1	1	0.00817724	0.000314855	-4.69886	0	1	1	0.0141426	0.000251051	-5.81592	0	1	1	0.000293651	0.000234676	-0.323433	0	1	1
Adcyap1r1	NM_133511	chr4:85662891-85711696	10.3076	2.53129	-2.02576	-1.67114	0.20205	0.549414	9.96448	0.000247617	-15.2964	-0.27355	0.13455	0.357509	2.46147	0.000266854	-13.1712	-0.245899	0.24555	0.609459	0.000230604	0.000249523	0.113753	0	1	1
Add1	NM_016990	chr14:81367465-81426496	88.1759	72.8805	-0.274851	-1.11392	0.121	0.427549	85.1182	62.5605	-0.444215	-1.85642	0.01085	0.0695052	70.7146	78.7694	0.155626	0.583074	0.4131	0.724509	60.1241	76.9063	0.35516	1.36769	0.0613	0.430216
Add2	NM_001109880	chr4:117744074-117882427	28.1145	19.91	-0.497825	-1.23327	0.0849	0.355844	27.1577	20.9618	-0.373594	-0.871857	0.21275	0.46067	19.324	31.3525	0.698188	1.56981	0.03145	0.234528	20.1589	30.6052	0.602361	1.30949	0.0605	0.428083
Add2	NM_012491	chr4:117744074-117882427	0.175561	0.196718	0.164156	0	1	1	0.169333	0.55559	1.71415	0.471836	0.53095	0.723507	0.190534	0.224687	0.237874	0	1	1	0.535574	0.219228	-1.28865	-0.359312	0.60385	0.85583
Add3	NM_001164103	chr1:273854247-273961982	16.2262	13.1898	-0.298901	-0.766424	0.2744	0.614924	15.6626	12.781	-0.293315	-0.588008	0.38405	0.608819	12.7902	8.63548	-0.566689	-0.996358	0.17485	0.536934	12.2852	8.41889	-0.545222	-0.840287	0.2632	0.684142
Add3	NM_031552	chr1:273854247-273961982	5.98991	3.80392	-0.655045	-0.850856	0.22865	0.5782	5.77654	6.8471	0.245288	0.287445	0.6746	0.818742	3.6854	6.83825	0.891805	0.99651	0.1647	0.525009	6.59326	6.6745	0.0176681	0.0187367	0.97945	0.993426
Adgrb2	NM_001107914	chr5:148200369-148231587	83.423	65.5436	-0.347991	-1.58161	0.0472	0.255539	80.5489	74.6242	-0.11022	-0.582415	0.5162	0.711178	63.6465	80.8668	0.345467	1.46084	0.07085	0.364212	71.6733	78.9783	0.14002	0.688594	0.44155	0.780718
Adgrb3	NM_001106898	chr9:31280622-32022098	14.2441	11.9203	-0.256941	-0.746175	0.27715	0.618014	13.7401	12.3476	-0.154167	-0.436977	0.5415	0.72974	11.5598	11.8205	0.0321664	0.0811011	0.90555	0.964303	11.8776	11.5351	-0.0422169	-0.105564	0.8811	0.963269
Adgre1	NM_001007557	chr9:9431887-9585852	0.684897	2.87688	2.07055	1.36745	0.09295	0.376108	0.661242	2.33522	1.82031	1.20573	0.10515	0.312445	2.79213	3.36874	0.270843	0.289959	0.6821	0.867449	2.24438	3.2885	0.551114	0.512487	0.46705	0.794631
Adgre5	NM_001012164	chr19:24854985-24874713	0.0964175	0.879215	3.18885	1.20797	0.2532	0.59879	0.0929117	0.1651	0.829407	0	1	1	0.855151	0.149643	-2.51465	-1.07147	0.2751	0.62792	0.159205	0.14638	-0.121173	0	1	1
Adgrf3	NM_001106712	chr6:27536183-27546443	0	0	0	0	1	1	0	0	0	0	1	1	0	0	0	0	1	1	0	0	0	0	1	1
Adgrf5	NM_139110	chr9:20094535-20195566	0.309999	0	#NAME?	0	1	1	0.298904	0.0478257	-2.64383	0	1	1	0	0.476727	inf	0	1	1	0.0461187	0.466371	3.33805	0	1	1
Adgrg1	NM_152242	chr19:10423533-10460674	41.0957	46.5055	0.178414	0.687548	0.354	0.67765	39.6828	29.9818	-0.404426	-1.52814	0.05775	0.218741	45.1424	24.7687	-0.865964	-2.79111	0.0003	0.00883561	28.8009	24.189	-0.251763	-0.787969	0.32675	0.726704
Adgrg2	NM_001270871	chrX:36930185-37003642	0.000920369	0.000889287	-0.0495632	0	1	1	0.000862099	0	#NAME?	0	1	1	0.000822809	0.00036699	-1.16482	0	1	1	0	0.000344815	inf	0	1	1
Adgrg2	NM_001270872	chrX:36930185-37003642	0.54268	0.648904	0.257905	0	1	1	0.52262	0	#NAME?	0	1	1	0.630303	0.0773357	-3.02684	-1.08896	0.2538	0.612555	0	0.0756753	inf	0	1	1
Adgrg2	NM_181366	chrX:36930185-37003642	1.97289e-06	0	#NAME?	0	1	1	1.80496e-06	0	#NAME?	0	1	1	0	4.3769e-06	inf	0	1	1	0	3.97618e-06	inf	0	1	1
Adgrg5	NM_001107410	chr19:10495516-10513349	0	0	0	0	1	1	0	0	0	0	1	1	0	0	0	0	1	1	0	0	0	0	1	1
Adgrg7	NM_001107098	chr11:46108242-46171080	0	0	0	0	1	1	0	0	0	0	1	1	0	0	0	0	1	1	0	0	0	0	1	1
Adgrg7	NM_001107098_1	chr11:46793776-46856291	0	0	0	0	1	1	0	0	0	0	1	1	0	0	0	0	1	1	0	0	0	0	1	1
Adgrl1	NM_022962	chr19:25029036-25069144	104.839	87.6586	-0.258213	-1.17545	0.11795	0.422986	101.245	109.319	0.110695	0.562698	0.48205	0.688807	85.1082	111.619	0.391212	1.71757	0.02875	0.223095	105.04	109.03	0.0537857	0.264437	0.7481	0.915235
Adgrl2	NM_001190475	chr2:258025176-259150709	1.06557	0	#NAME?	#NAME?	0.12065	0.427549	1.02443	0	#NAME?	#NAME?	0.1192	0.334943	0	0	0	0	1	1	0	0	0	0	1	1
Adgrl2	NM_001302208	chr2:258025176-259150709	0.664746	0	#NAME?	#NAME?	0.12375	0.431915	0.642091	0	#NAME?	#NAME?	0.12395	0.340775	0	8.68133e-05	inf	0	1	1	0	8.14501e-05	inf	0	1	1
Adgrl2	NM_001302209	chr2:258025176-259150709	2.02676	1.20205	-0.753674	-0.485607	0.4933	0.768392	1.96249	2.05622	0.0673038	0.0370576	0.9343	0.961869	1.16957	0	#NAME?	#NAME?	0.1798	0.541582	1.97299	0	#NAME?	#NAME?	0.17855	0.633858
Adgrl2	NM_001302210	chr2:258025176-259150709	1.6131	1.32008	-0.289207	-0.15437	0.83815	0.937293	1.56206	2.64212	0.758247	0.460351	0.56055	0.743952	1.28403	6.46212e-05	-14.2783	-0.0845732	0.34025	0.673284	2.54416	6.01336e-05	-15.3687	-0.0903009	0.21335	0.661135
Adgrl2	NM_001302211	chr2:258025176-259150709	1.70739	0.000297193	-12.4881	-0.208631	0.37725	0.694592	1.63592	0	#NAME?	#NAME?	0.1903	0.43572	0.000277284	2.6045	13.1974	0.220928	0.40045	0.717758	0	2.53629	inf	#NAME?	0.20745	0.656151
Adgrl2	NM_001302212	chr2:258025176-259150709	1.98667	4.36051	1.13414	0.662661	0.36615	0.688289	1.91331	0.610706	-1.64752	-0.691265	0.47515	0.683027	4.22566	2.71609	-0.637645	-0.433995	0.53725	0.792656	0.586255	2.65497	2.1791	0.9586	0.30695	0.713469
Adgrl2	NM_134408	chr2:258025176-259150709	1.22777	0.0123038	-6.64078	-0.912213	0.4036	0.713797	1.1827	0.000511726	-11.1744	-0.308952	0.34035	0.570723	0.0114285	0	#NAME?	0	1	1	0.000463919	0	#NAME?	0	1	1
Adgrl3	NM_130822	chr14:28392915-28856315	10.9277	10.9771	0.00650452	0.0172129	0.98075	0.991651	10.542	4.56561	-1.20727	-2.5222	0.0014	0.0147991	10.6503	5.52716	-0.946285	-1.92498	0.0075	0.098839	4.39151	5.39402	0.296644	0.498918	0.4558	0.789622
Adgrl4	NM_022294	chr2:256609786-256724642	0.148531	0.48191	1.698	0	1	1	0.142761	0.0193596	-2.88248	0	1	1	0.468567	0	#NAME?	0	1	1	0.0185636	0	#NAME?	0	1	1
Adh1	NM_019286	chr2:243550654-243562243	0.0160388	0.0356294	1.1515	0	1	1	0.0154509	0.918689	5.89381	1.3341	0.1987	0.446923	0.0346529	0	#NAME?	0	1	1	0.885897	0	#NAME?	#NAME?	0.017	0.251627
Adh4	NM_017270	chr2:243702034-243720063	0	0	0	0	1	1	0	0	0	0	1	1	0	0	0	0	1	1	0	0	0	0	1	1
Adh5	NM_001126120	chr2:243728499-243740907	74.0059	74.3723	0.00712541	0.0221579	0.9748	0.990206	71.3763	38.186	-0.902401	-2.33859	0.00105	0.0118244	72.1891	49.5949	-0.541588	-1.42785	0.0477	0.294508	36.7567	48.4232	0.397692	0.882786	0.2025	0.655051
Adh6	NM_001012084	chr2:243656578-243687857	0	0.0784726	inf	0	1	1	0	0	0	0	1	1	0.07592	0	#NAME?	0	1	1	0	0	0	0	1	1
Adh6a	NM_001106475	chr2:243591384-243599351	0	0	0	0	1	1	0	0	0	0	1	1	0	0	0	0	1	1	0	0	0	0	1	1
Adh7	NM_134329	chr2:243502072-243516533	0	1.321	inf	#NAME?	5e-05	0.0023396	0	0	0	0	1	1	1.278	0	#NAME?	#NAME?	5e-05	0.0020606	0	0	0	0	1	1
Adhfe1	NM_001025423	chr5:9403195-9429745	19.8647	18.4664	-0.105301	-0.228071	0.7439	0.899167	19.1696	18.6281	-0.0413463	-0.0855479	0.91225	0.94956	17.9194	18.7139	0.0625882	0.118734	0.865	0.948276	17.8943	18.2679	0.0298175	0.0552167	0.93865	0.983016
Adi1	NM_199097	chr6:47940213-47947172	40.5339	48.8839	0.270232	0.728246	0.30335	0.63814	39.0816	30.4591	-0.359617	-0.879085	0.2249	0.471309	47.3858	33.3937	-0.50488	-1.1639	0.10125	0.431608	29.3238	32.5921	0.152448	0.322256	0.6591	0.877333
Adipoq	NM_144744	chr11:81330844-81344488	0	0.0189134	inf	0	1	1	0	0	0	0	1	1	0.0182976	0	#NAME?	0	1	1	0	0	0	0	1	1
Adipor1	NM_207587	chr13:51240910-51260230	39.6513	47.5624	0.262452	0.803635	0.26095	0.603518	38.267	46.9283	0.294358	0.858641	0.2203	0.468367	46.1502	36.2116	-0.349885	-0.941789	0.1858	0.548188	45.1527	35.3543	-0.352927	-0.913998	0.18665	0.638696
Adipor2	NM_001037979	chr4:151414868-151428819	6.01802	2.95527	-1.026	-0.880072	0.2298	0.578996	5.8034	6.19386	0.0939391	0.0937855	0.8915	0.939515	2.86962	1.98732	-0.530039	-0.279496	0.70585	0.87874	5.95991	1.93989	-1.61932	-1.09206	0.13225	0.565074
Adk	NM_012895	chr15:3033534-3435888	57.3474	48.4381	-0.243586	-0.760749	0.27905	0.619992	55.308	37.6552	-0.554636	-1.66234	0.0255	0.126561	46.9783	36.3236	-0.371086	-0.968835	0.1757	0.53774	36.2549	35.4438	-0.0326416	-0.0825399	0.90965	0.974582
Adm	NM_012715	chr1:175445087-175447259	1.81842	0.435342	-2.06246	-0.973153	0.3797	0.696344	1.75637	2.84886	0.697782	0.436953	0.54765	0.734363	0.423278	0.0574924	-2.88016	0	1	1	2.74456	0.0562442	-5.60873	-1.82244	0.2363	0.678537
Adm2	NM_201426	chr7:130296894-130298641	0	0	0	0	1	1	0	0	0	0	1	1	0	0	0	0	1	1	0	0	0	0	1	1
Adnp	NM_022681	chr3:164937187-164964615	27.8709	27.8897	0.000974648	0.00358149	0.99655	0.99803	26.8929	24.4676	-0.136353	-0.494442	0.48535	0.690731	27.0503	24.8397	-0.122996	-0.409208	0.5569	0.802164	23.537	24.2429	0.0426308	0.140043	0.84275	0.948878
Adnp2	NM_001127373	chr18:76637415-76661186	4.22718	1.83973	-1.2002	-1.68327	0.0259	0.18013	4.08314	1.00671	-2.02002	-2.1134	0.00175	0.0177929	1.78393	2.07996	0.221493	0.229416	0.75025	0.898358	0.969988	2.03206	1.0669	0.90733	0.1391	0.576851
Ado	NM_001107626	chr20:22447995-22449176	0.363618	0.358763	-0.0193932	0	1	1	0.351078	0.811185	1.20824	0	1	1	0.348823	0.121646	-1.5198	0	1	1	0.778511	0.118657	-2.71392	0	1	1
Adora1	NM_017155	chr13:51043497-51075807	10.2482	3.15292	-1.7006	-1.64539	0.0383	0.225596	9.89192	3.90968	-1.3392	-1.14382	0.06455	0.232408	3.06294	8.72177	1.5097	1.13846	0.1584	0.517484	3.76521	8.51216	1.1768	0.844385	0.1929	0.644931
Adora2a	NM_053294	chr20:14265251-14282873	63.0843	53.7229	-0.231745	-0.833416	0.2598	0.603518	60.9025	8.47191	-2.84574	-6.79534	5e-05	0.000964063	52.148	9.08792	-2.52059	-5.10487	5e-05	0.0020606	8.1367	8.87647	0.125542	0.202317	0.80065	0.936201
Adora2b	NM_017161	chr10:48569565-48586366	1.73541	3.27264	0.915177	0.75972	0.2725	0.612897	1.67367	4.78569	1.51571	1.31913	0.06255	0.228363	3.17317	1.10546	-1.52127	-1.04102	0.13815	0.485607	4.59283	1.08105	-2.08695	-1.47156	0.04	0.367175
Adora3	NM_001302755	chr2:208323727-208399716	8.84089e-05	0.000109265	0.305571	0	1	1	8.48231e-05	0	#NAME?	0	1	1	9.91346e-05	0.000206967	1.06194	0	1	1	0	0.000195168	inf	0	1	1
Adora3	NM_001302755_1	chr2:208478372-208557356	0.000107585	0.000133921	0.315902	0	1	1	0.000103662	0	#NAME?	0	1	1	0.000122259	0.000188149	0.621937	0	1	1	0	0.000173838	inf	0	1	1
Adora3	NM_012896	chr2:208323727-208399716	0.0125066	0.0120277	-0.0563261	0	1	1	0.0120407	0	#NAME?	0	1	1	0.0116438	0.0471545	2.01784	0	1	1	0	0.0459924	inf	0	1	1
Adora3	NM_012896_1	chr2:208478372-208557356	0.0124866	0.0120022	-0.0570811	0	1	1	0.012021	0	#NAME?	0	1	1	0.0116198	0.0471748	2.02143	0	1	1	0	0.0460153	inf	0	1	1
Adpgk	NM_001100723	chr8:64088912-64116832	19.8955	18.9886	-0.0673143	-0.170251	0.8145	0.927482	19.2034	14.2576	-0.42963	-0.983218	0.15985	0.396681	18.4298	10.5992	-0.79808	-1.547	0.03825	0.261341	13.7125	10.3475	-0.40621	-0.729317	0.29545	0.707289
Adprh	NM_183325	chr11:64861771-64868110	102.343	62.0932	-0.720905	-2.25368	0.00265	0.0428173	98.7767	67.8853	-0.541071	-1.68167	0.0198	0.105892	60.2412	58.0315	-0.0539129	-0.139028	0.8409	0.938834	65.2799	56.6544	-0.204451	-0.52428	0.4592	0.791607
Adprhl1	NM_001013054	chr16:81616603-81632018	0.986578	1.30989	0.408936	0.214889	0.73705	0.895964	0.950416	0.52372	-0.859764	-0.356669	0.39945	0.622375	1.27395	3.95467	1.63424	0.999836	0.2117	0.577152	0.504394	3.85877	2.93552	1.36998	0.26215	0.683481
Adprhl2	NM_001108680	chr5:144336311-144341586	94.2723	72.7746	-0.373399	-1.22648	0.08635	0.359218	91.0062	61.4848	-0.565734	-1.8103	0.0165	0.0938978	70.6338	89.4044	0.339986	1.00494	0.1705	0.530844	59.0916	87.2948	0.562942	1.6332	0.02815	0.321722
Adprm	NM_001009246	chr10:53583278-53595759	18.0878	13.2775	-0.446032	-0.72856	0.30385	0.63814	17.4537	10.6203	-0.716708	-1.03573	0.13275	0.354979	12.8987	15.3736	0.25323	0.34246	0.6389	0.84526	10.2119	14.9933	0.554065	0.66425	0.3449	0.736212
Adra1a	NM_017191	chr15:43299384-43392431	0	0.0943112	inf	0	1	1	0	0	0	0	1	1	0.0916425	0.745196	3.02353	1.13995	0.50525	0.775846	0	0.725654	inf	#NAME?	0.12385	0.551555
Adra1b	NM_016991	chr10:29392761-29450644	1.79658	1.4722	-0.287281	-0.258763	0.7675	0.907159	1.73468	5.42761	1.64565	1.90455	0.04865	0.195383	1.43017	3.92287	1.45573	1.14978	0.18045	0.54256	5.21291	3.83333	-0.443491	-0.580798	0.5207	0.816788
Adra1d	NM_024483	chr3:124129557-124145566	3.63262	4.90236	0.432466	0.702206	0.45945	0.749057	3.50716	17.0608	2.28231	4.02052	0.0009	0.0105824	4.76501	15.096	1.66362	3.10842	0.0043	0.0678632	16.386	14.7481	-0.151935	-0.409724	0.68355	0.888572
Adra2a	NM_012739	chr1:274766282-274769083	7.34387	7.65696	0.0602298	0.119595	0.87965	0.954368	7.08729	3.8265	-0.889208	-1.46519	0.0694	0.242786	7.43535	6.87318	-0.113421	-0.191535	0.81015	0.925081	3.67802	6.71412	0.868268	1.23014	0.1345	0.567747
Adra2b	NM_138505	chr3:119805940-119809987	0.743938	0.359687	-1.04844	-0.71677	0.35435	0.67765	0.717838	0.229368	-1.64599	-0.789902	0.1042	0.310586	0.349395	0.0792507	-2.14036	0	1	1	0.221183	0.0774602	-1.51371	0	1	1
Adra2c	NM_138506	chr14:80730306-80732010	43.9632	19.8931	-1.14402	-2.71888	0.00165	0.0307352	42.4255	10.593	-2.00181	-4.87824	5e-05	0.000964063	19.3128	15.5789	-0.309965	-0.554192	0.5053	0.775846	10.1757	15.2189	0.580735	1.01151	0.3255	0.725773
Adrb1	NM_012701	chr1:277537584-277538985	7.57591	9.61797	0.344313	0.450763	0.54495	0.799251	7.31327	5.95921	-0.295396	-0.395753	0.6613	0.810668	9.34422	6.32607	-0.562764	-0.670967	0.45135	0.746786	5.72301	6.17828	0.110431	0.142022	0.89255	0.967736
Adrb2	NM_012492	chr18:57513791-57515834	4.28198	1.83222	-1.22469	-1.05742	0.1421	0.462517	4.1279	0.60457	-2.77143	-1.91922	0.0206	0.108879	1.77806	0.549024	-1.69537	-0.90474	0.2294	0.596542	0.581865	0.534779	-0.121742	-0.0558266	0.7443	0.91418
Adrb3	NM_013108	chr16:69003867-69006632	0.384134	0	#NAME?	0	1	1	0.371128	0	#NAME?	0	1	1	0	0	0	0	1	1	0	0	0	0	1	1
Adrbk1	NM_012776	chr1:219536219-219544329	30.3216	25.1995	-0.266953	-0.730219	0.32065	0.650419	29.2697	14.2905	-1.03436	-2.45642	0.00185	0.0185047	24.4635	27.3507	0.160945	0.390608	0.5979	0.822615	13.7313	26.7063	0.959708	2.03221	0.00795	0.169336
Adrbk2	NM_012897	chr12:49626870-49746269	2.1595	1.16327	-0.892502	-0.635187	0.2768	0.617587	2.08424	1.06046	-0.97483	-0.515669	0.4199	0.640052	1.12639	1.63861	0.540764	0.282916	0.70155	0.876318	1.02181	1.60055	0.647439	0.333907	0.63025	0.866591
Adrm1	NM_031708	chr3:175548180-175552943	78.3317	88.1527	0.170409	0.557555	0.4523	0.744949	75.6229	61.4524	-0.299353	-0.917591	0.2243	0.47127	85.5841	56.4969	-0.599171	-1.69524	0.02965	0.226166	59.0656	55.1778	-0.0982317	-0.261961	0.73645	0.910594
Adsl	NM_001130503	chr7:122157200-122192328	42.8287	33.9989	-0.333092	-0.818742	0.24455	0.591185	41.346	31.8593	-0.376034	-0.863605	0.22135	0.469047	32.984	32.6888	-0.0129704	-0.0280893	0.967	0.9891	30.637	31.9124	0.058842	0.119871	0.8643	0.956311
Adss	NM_001105975	chr13:95913425-95943761	20.0223	12.6705	-0.66013	-1.5759	0.02895	0.1909	19.3115	17.7605	-0.120787	-0.300997	0.66945	0.815095	12.2839	19.3027	0.652036	1.40076	0.0562	0.324968	17.0828	18.8273	0.140282	0.321735	0.65245	0.875434
Adtrp	NM_001014144	chr17:22620618-22688296	1.3901	0.802603	-0.792426	-0.367116	0.54815	0.800905	1.34343	0.97408	-0.463807	-0.225235	0.7289	0.851934	0.776913	2.33678	1.5887	0.72457	0.415	0.726094	0.937399	2.2839	1.28476	0.662828	0.1954	0.646744
Aebp1	NM_001100970	chr14:86101331-86111323	14.0506	10.9861	-0.354956	-0.791657	0.25805	0.602288	13.569	8.08321	-0.74732	-1.58071	0.04455	0.18383	10.6558	9.62271	-0.14713	-0.273372	0.7024	0.877066	7.76662	9.3988	0.275189	0.489639	0.5199	0.81634
Aebp2	NM_001106626	chr4:174810958-174863260	0.919176	1.63564	0.831445	0.524798	0.4474	0.741946	0.886463	2.04993	1.20944	0.770262	0.2888	0.521906	1.58857	2.07682	0.386643	0.232154	0.72365	0.887037	1.97045	2.02649	0.0404546	0.0197624	0.97735	0.993294
Aen	NM_001108487	chr1:140584379-140593747	8.91104	10.1872	0.193087	0.334392	0.6396	0.846576	8.60063	6.10997	-0.493277	-0.728477	0.28395	0.518012	9.88877	4.59629	-1.10532	-1.36172	0.05065	0.305603	5.8736	4.4824	-0.389972	-0.418258	0.53845	0.825267
Aes	NM_019220	chr7:11012842-11018143	967.03	858.678	-0.171442	-0.826735	0.29005	0.627265	934.004	782.367	-0.255584	-1.3928	0.0879	0.281314	833.885	924.996	0.149599	0.684491	0.38025	0.705401	751.672	903.328	0.265145	1.35687	0.09295	0.507305
Afap1	NM_080900	chr14:79923131-79987915	6.77523	7.38246	0.123832	0.214423	0.76955	0.907571	6.54224	3.84335	-0.76742	-1.10395	0.1357	0.359262	7.17244	8.17148	0.188132	0.302022	0.69515	0.874756	3.69202	7.97984	1.11195	1.49746	0.0662	0.445415
Afap1l1	NM_001106142	chr18:57053946-57114545	1.30762	2.04638	0.646133	0.563244	0.4812	0.762025	1.26369	2.86856	1.18269	1.10592	0.153	0.386889	1.9897	3.58652	0.85003	0.816089	0.2833	0.631755	2.75241	3.50298	0.34789	0.388445	0.63475	0.868922
Afap1l2	NM_001305184	chr1:277730759-277827269	2.09121	1.9861	-0.0744027	-0.0766584	0.9181	0.971149	2.02098	1.67128	-0.274106	-0.273985	0.6807	0.82241	1.92706	1.79232	-0.104574	-0.0941999	0.8948	0.958985	1.60732	1.74936	0.122166	0.103025	0.87325	0.959439
Aff1	NM_001107206	chr14:7226585-7325645	0.937188	1.52183	0.699397	0.657634	0.4087	0.717051	0.906167	2.33673	1.36664	1.36068	0.08695	0.279111	1.47757	2.22282	0.589161	0.592804	0.39	0.712384	2.24564	2.16929	-0.0499023	-0.0524876	0.9425	0.98396
Aff3	NM_001191887	chr9:44840030-45206427	4.4548	1.63864	-1.44287	-1.6261	0.0481	0.257517	4.30474	2.15194	-1.00029	-1.21762	0.1519	0.385565	1.59109	3.45432	1.11839	1.04104	0.17345	0.534606	2.06602	3.37167	0.706605	0.702351	0.3715	0.749219
Aff4	NM_001107001	chr10:38692210-38774515	13.635	20.0048	0.553034	2.09426	0.00265	0.0428173	13.1495	16.5602	0.332713	1.25348	0.0729	0.251527	19.4021	15.5344	-0.320746	-1.14183	0.10465	0.439883	15.9268	15.1559	-0.0715732	-0.254248	0.72185	0.905032
Afg3l1	NM_001108456	chr19:56272170-56299322	15.0518	11.0809	-0.441863	-0.847032	0.2302	0.578996	14.5292	15.9671	0.136156	0.269831	0.6953	0.832544	10.7507	13.6647	0.346026	0.572994	0.4181	0.727806	15.3537	13.3443	-0.202364	-0.351246	0.6268	0.865965
Afg3l2	NM_001134864	chr18:63141417-63185510	33.4495	30.6586	-0.125694	-0.383863	0.57875	0.816377	32.2813	29.5819	-0.125981	-0.371597	0.6035	0.772024	29.7563	39.9103	0.423564	1.19139	0.0982	0.425448	28.4445	38.9622	0.453925	1.2494	0.07935	0.481109
Afm	NM_172320	chr14:19079600-19132169	0	0.0302314	inf	0	1	1	0	0	0	0	1	1	0.0292476	0	#NAME?	0	1	1	0	0	0	0	1	1
Afmid	NM_001111366	chr10:106828980-106844314	5.6407	2.34772	-1.26461	-1.65913	0.0233	0.168979	5.44539	3.01862	-0.851144	-1.2342	0.1216	0.338281	2.27787	3.01377	0.403889	0.395016	0.60035	0.82442	2.89872	2.94266	0.0217044	0.02249	0.97715	0.993294
Afp	NM_012493	chr14:19141754-19159919	0	0	0	0	1	1	0	0	0	0	1	1	0	0	0	0	1	1	0	0	0	0	1	1
Aftph	NM_001305127	chr14:104921632-104975595	12.0595	18.5823	0.623761	1.673	0.02135	0.160303	11.6301	13.9619	0.263631	0.645703	0.355	0.584914	18.0226	12.8393	-0.489246	-1.19612	0.0858	0.401882	13.4217	12.5323	-0.0989117	-0.223272	0.74575	0.914411
Aga	NM_001031641	chr16:41222237-41234095	16.297	21.9187	0.427555	0.731778	0.28075	0.620938	15.7107	13.6579	-0.202013	-0.296636	0.6854	0.825367	21.2445	13.6763	-0.635415	-0.914589	0.18855	0.551973	13.1379	13.3397	0.0219961	0.0277723	0.96905	0.991225
Agap1	NM_001108230	chr9:96746439-97030163	71.0961	50.0129	-0.507471	-1.98556	0.0061	0.0741765	68.6287	34.5643	-0.989529	-3.82811	5e-05	0.000964063	48.5208	50.5644	0.059519	0.211964	0.7666	0.905587	33.2239	49.3742	0.571539	1.99075	0.00635	0.148372
Agap2	NM_023026	chr7:70364812-70377422	49.89	34.8354	-0.518199	-2.10718	0.0082	0.0896482	48.1708	56.5081	0.2303	1.07294	0.2107	0.459029	33.8277	73.634	1.12217	4.4203	5e-05	0.0020606	54.2746	71.9359	0.406435	1.91867	0.03645	0.354866
Agap3	NM_001108616	chr4:7202329-7228675	85.297	68.2579	-0.321499	-1.47942	0.0689	0.315298	82.3581	74.9925	-0.135165	-0.693121	0.42455	0.643297	66.2972	88.5482	0.417515	1.85442	0.027	0.215096	72.0359	86.5008	0.263998	1.31438	0.14745	0.591032
Agbl4	NM_001100981	chr5:130286392-130305884	1.60971	3.3504	1.05753	0.586542	0.39505	0.7079	1.55246	2.77935	0.840191	0.451838	0.48525	0.690731	3.2428	0.727409	-2.1564	-1.07073	0.3095	0.64876	2.67402	0.709119	-1.91491	-0.939619	0.3424	0.735374
Agbl5	NM_001126372	chr6:26838034-26855658	1.88792	1.6071	-0.232339	-0.210531	0.78375	0.912884	1.82356	1.82806	0.00355111	0.00387062	0.9953	0.997001	1.55933	1.08815	-0.519046	-0.361741	0.59435	0.82109	1.75457	1.06137	-0.725191	-0.429819	0.53415	0.822743
Ager	NM_053336	chr20:4302344-4517128	0.522576	0.556837	0.0916161	0	1	1	0.505015	3.21286	2.66946	0.519841	0.4176	0.638346	0.538791	0.822971	0.611115	0.0783385	0.8147	0.927247	3.08194	0.804995	-1.93679	-0.388926	0.63015	0.866591
Agfg1	NM_001135596	chr9:88607507-88663486	14.6826	24.2483	0.72378	2.04623	0.00455	0.0605528	14.1556	26.123	0.883952	2.47087	0.00135	0.014453	23.5101	22.265	-0.0785042	-0.217353	0.7522	0.898679	25.1253	21.7237	-0.20987	-0.590292	0.3955	0.76167
Agfg2	NM_001107131	chr12:22082064-22118220	17.5269	21.7004	0.308149	0.906999	0.2535	0.59879	16.9221	18.4614	0.125603	0.344495	0.66385	0.812435	21.0794	16.4186	-0.360503	-0.89985	0.23865	0.605213	17.7409	16.0326	-0.146067	-0.34505	0.64315	0.870495
Agk	NM_001127497	chr4:68483637-68561511	17.7873	21.0847	0.245353	0.580614	0.4067	0.715102	17.1618	12.6469	-0.440415	-0.894591	0.20865	0.457098	20.4659	17.2391	-0.247536	-0.517296	0.4687	0.756997	12.1575	16.8305	0.469235	0.83825	0.2364	0.678537
Agl	NM_001108564	chr2:219788233-219842986	3.85513	2.30211	-0.743821	-1.42229	0.04645	0.253202	3.71716	1.65423	-1.16804	-2.00184	0.01225	0.0764272	2.23252	3.46121	0.632603	1.04594	0.1375	0.484783	1.59208	3.3762	1.08449	1.63134	0.0326	0.339992
Agmat	NM_001048185	chr5:160306950-160321074	0.434923	0.859459	0.982668	0.434754	0.4854	0.763611	0.420393	0	#NAME?	0	1	1	0.835481	1.60098	0.938276	0.477851	0.49835	0.772368	0	1.56604	inf	#NAME?	0.1172	0.546833
Agmo	NM_001135899	chr6:56846858-57193918	0.916667	2.19573	1.26023	0.750731	0.27545	0.616326	0.884928	0	#NAME?	#NAME?	0.00015	0.00238596	2.13065	0.877104	-1.28047	-0.759885	0.25515	0.612757	0	0.857941	inf	#NAME?	5e-05	0.00359193
Ago1	NM_001191765	chr5:144444389-144479396	9.40549	10.3925	0.143964	0.444908	0.53565	0.792968	9.0756	7.71189	-0.234908	-0.663413	0.34475	0.575221	10.0855	9.72992	-0.0517778	-0.141499	0.83775	0.937415	7.41716	9.49409	0.356163	0.900147	0.19475	0.646735
Ago2	NM_021597	chr7:114339606-114377277	2.11579	3.15029	0.57429	0.540491	0.44705	0.74147	2.04424	3.15241	0.624891	0.537336	0.45175	0.664892	3.05799	1.81867	-0.749703	-0.632939	0.3744	0.699892	3.02857	1.77752	-0.768767	-0.503463	0.46465	0.794161
Ago3	NM_001271193	chr5:144364257-144436509	2.58491	0.265937	-3.28096	-1.91052	0.21865	0.567258	2.49768	2.25398	-0.148115	-0.149997	0.83225	0.910216	0.258523	0.721504	1.48071	0.694427	0.42955	0.733806	2.1632	0.705453	-1.61655	-1.05652	0.11185	0.54082
Ago4	NM_001106686	chr5:144504937-144556889	0.399587	0.00690536	-5.85465	0	1	1	0.385565	0.00619987	-5.95859	0	1	1	0.00671511	0.510959	6.24965	0	1	1	0.0059461	0.49978	6.3932	0	1	1
Agpat1	NM_212458	chr20:4302344-4517128	87.7862	104.567	0.252359	0.592585	0.46545	0.752153	84.7917	104.123	0.296295	0.840168	0.337	0.568684	101.541	93.173	-0.124083	-0.275723	0.7316	0.890673	100.035	91.0005	-0.136552	-0.360433	0.67755	0.885738
Agpat2	NM_001107821	chr3:4044740-4055384	0	0	0	0	1	1	0	0.0250648	inf	0	1	1	0	0.976799	inf	#NAME?	0.11665	0.457657	0.0241702	0.954768	5.30385	1.38989	0.39375	0.761175
Agpat3	NM_001106378	chr20:11114163-11144806	31.2481	29.9463	-0.0613893	-0.237222	0.745	0.899753	30.1558	33.4692	0.150399	0.602494	0.4123	0.633472	29.0586	34.6981	0.255891	0.912842	0.205	0.569401	32.1647	33.8756	0.0747698	0.279686	0.69705	0.894331
Agpat4	NM_133406	chr1:48719631-48825378	46.0212	72.4705	0.655096	2.07839	0.005	0.0651336	44.4055	71.1863	0.680859	2.10787	0.0042	0.0346006	70.3373	59.8543	-0.232836	-0.715353	0.3336	0.668748	68.4164	58.462	-0.226844	-0.689643	0.35105	0.739154
Agpat5	NM_001134744	chr16:75812994-75855745	13.6158	12.4291	-0.131562	-0.292771	0.66815	0.860325	13.1295	16.2269	0.305576	0.698754	0.3212	0.552764	12.0563	16.2397	0.429745	0.874573	0.20395	0.567431	15.6079	15.8545	0.0226233	0.0485234	0.9447	0.984626
Agpat6	NM_001047849	chr16:73615948-73649771	18.314	23.5328	0.361726	1.00233	0.16485	0.497527	17.6754	22.7577	0.36461	0.966353	0.17895	0.421082	22.8388	31.7967	0.477389	1.3015	0.0691	0.360104	21.878	31.0426	0.504766	1.34239	0.0569	0.41705
Agpat9	NM_001025670	chr14:10344294-10394999	0.820761	0.030388	-4.75539	-1.41619	0.25235	0.598519	0.791496	0.0825189	-3.26179	-1.1142	0.2315	0.477199	0.0295533	0.0669899	1.18062	0	1	1	0.0795738	0.0655334	-0.280063	0	1	1
Agps	NM_053350	chr3:62648351-62749250	1.74196	0.589833	-1.56233	-0.931549	0.1625	0.493875	1.67833	0.979118	-0.777475	-0.504249	0.4821	0.688807	0.573105	1.70324	1.57141	0.850993	0.1603	0.519327	0.943525	1.66095	0.815878	0.442712	0.5361	0.823663
Agr2	NM_001106725	chr6:55465781-55487086	0	0.471866	inf	0	1	1	0	0	0	0	1	1	0.458524	0	#NAME?	0	1	1	0	0	0	0	1	1
Agr3	NM_001106724	chr6:55371737-55424233	0	0	0	0	1	1	0	0	0	0	1	1	0	0	0	0	1	1	0	0	0	0	1	1
Agrn	NM_175754	chr5:173589910-173611202	8.72164	6.87979	-0.342237	-0.960381	0.198	0.544093	8.42017	7.57663	-0.152293	-0.425597	0.571	0.749925	6.68054	9.87232	0.563425	1.43754	0.0648	0.348599	7.28089	9.64227	0.405257	1.05221	0.1809	0.63571
Agrp	NM_033650	chr19:37526418-37528011	3.75322	3.40808	-0.139168	-0.0684444	0.9166	0.970088	3.62295	3.11737	-0.216834	-0.113174	0.87095	0.930401	3.30025	0.0614228	-5.74766	-1.9198	0.15805	0.517247	3.00198	0.0600832	-5.64281	-1.93107	0.1574	0.60416
Agt	NM_134432	chr19:57321638-57333433	117.221	120.055	0.0344682	0.140458	0.8574	0.944331	113.19	42.5849	-1.41034	-5.15475	5e-05	0.000964063	116.586	49.1922	-1.2449	-4.03072	5e-05	0.0020606	40.9103	48.0299	0.231468	0.66855	0.40775	0.767087
Agtpbp1	NM_001106100	chr17:5511384-5614416	48.2956	39.4325	-0.292505	-1.08825	0.12025	0.427482	46.5799	52.6684	0.17723	0.691135	0.3362	0.568152	38.2551	61.5726	0.686637	2.41065	0.00075	0.0184541	50.6828	60.0784	0.24535	0.919633	0.19805	0.649604
Agtr1a	NM_030985	chr17:35907105-35958077	0.354225	0	#NAME?	0	1	1	0.34099	0	#NAME?	0	1	1	0	0	0	0	1	1	0	0	0	0	1	1
Agtr1b	NM_031009	chr2:105149019-105224295	0	0	0	0	1	1	0	0	0	0	1	1	0	0	0	0	1	1	0	0	0	0	1	1
Agtr2	NM_012494	chrX:119391142-119392234	0	0	0	0	1	1	0	0	0	0	1	1	0	0	0	0	1	1	0	0	0	0	1	1
Agtrap	NM_001007654	chr5:164888084-164898387	8.68019	7.01553	-0.307174	-0.502645	0.48275	0.762803	8.38327	4.36222	-0.94245	-1.28588	0.07385	0.253364	6.8089	5.1804	-0.394357	-0.485595	0.49505	0.770555	4.19577	5.05669	0.269259	0.285944	0.67885	0.886383
Agxt	NM_001270659	chr9:99557510-100504076	0	0	0	0	1	1	0	0	0	0	1	1	0	0	0	0	1	1	0	0	0	0	1	1
Agxt	NM_030656	chr9:99557510-100504076	0	0	0	0	1	1	0	0	0	0	1	1	0	0	0	0	1	1	0	0	0	0	1	1
Agxt2	NM_031835	chr2:60337731-60379144	0	0	0	0	1	1	0	0	0	0	1	1	0	0	0	0	1	1	0	0	0	0	1	1
Ahctf1	NM_001271270	chr13:97969334-98078946	4.02992	1.55746	-1.37156	-2.44973	0.0017	0.0311702	3.88666	1.76081	-1.14229	-2.08308	0.00505	0.0396259	1.51121	2.16402	0.518016	0.739004	0.2664	0.620615	1.69351	2.11319	0.319404	0.463721	0.4977	0.80842
Ahcy	NM_017201	chr3:150587832-150603057	21.5336	25.2384	0.22903	0.517313	0.46605	0.752291	20.7872	17.4538	-0.252157	-0.505285	0.4853	0.690731	24.492	15.9998	-0.614258	-1.13493	0.1048	0.439986	16.7747	15.614	-0.103453	-0.171197	0.80545	0.937112
Ahcyl1	NM_001108561	chr2:210438892-210473761	37.0322	45.3667	0.292852	1.06561	0.1318	0.444963	35.6967	42.3871	0.247835	0.89598	0.2035	0.452354	44.0078	35.2647	-0.319534	-1.06567	0.1322	0.478389	40.7728	34.4087	-0.244836	-0.814371	0.24825	0.679537
Ahcyl2	NM_001173510	chr4:57050240-57199870	6.48335	7.74446	0.256426	0.617602	0.38965	0.704719	6.25555	7.36663	0.23587	0.536256	0.44885	0.662287	7.51754	4.27721	-0.81359	-1.55522	0.0295	0.225612	7.08042	4.17817	-0.760964	-1.39258	0.04975	0.398758
Ahdc1	NM_001134956	chr5:151211341-151381238	7.20434	5.29049	-0.445464	-1.05922	0.1883	0.530409	6.9581	4.95251	-0.490534	-1.06852	0.18515	0.428025	5.13622	7.5734	0.560234	1.20905	0.12945	0.473729	4.76176	7.39845	0.635729	1.26607	0.117	0.546756
Ahi1	NM_001002277	chr1:16478126-16601769	45.9003	42.7912	-0.101189	-0.337692	0.6321	0.842656	44.2881	17.8247	-1.31304	-3.5788	5e-05	0.000964063	41.4897	15.8291	-1.39018	-3.3961	0.00015	0.00492803	17.1442	15.4505	-0.150067	-0.313918	0.6572	0.877333
Ahnak	NM_001191951	chr1:225184938-225215015	0.964537	0.650018	-0.569356	-0.806127	0.23715	0.5849	0.930553	0.411005	-1.17893	-1.36316	0.05155	0.202588	0.629552	0.9226	0.55138	0.669599	0.3379	0.672169	0.395426	0.900381	1.18713	1.19177	0.0799	0.481565
Ahr	NM_001308254	chr6:54963989-55001464	8.64268e-05	1.46657e-05	-2.55903	0	1	1	8.02356e-05	8.45476e-06	-3.24641	0	1	1	1.33768e-05	4.94359e-05	1.88583	0	1	1	7.75321e-06	4.70686e-05	2.6019	0	1	1
Ahr	NM_001308255	chr6:54963989-55001464	0.496671	0.177832	-1.48177	0	1	1	0.477368	0.401822	-0.248546	0	1	1	0.172361	0.145373	-0.245668	0	1	1	0.386512	0.141562	-1.44908	0	1	1
Ahr	NM_013149	chr6:54963989-55001464	0.806271	0.000242905	-11.6967	-0.233799	0.30035	0.636032	0.779988	0.000452215	-10.7522	-0.278803	0.31515	0.548227	0.00022625	0.790943	11.7714	0.23541	0.28225	0.63087	0.000421509	0.773822	10.8422	0.282447	0.2948	0.707289
Ahr	NR_131775	chr6:54963989-55001464	0	0	0	0	1	1	0	0	0	0	1	1	0	0	0	0	1	1	0	0	0	0	1	1
Ahr	NR_131776	chr6:54963989-55001464	0	0	0	0	1	1	0	0	0	0	1	1	0	0	0	0	1	1	0	0	0	0	1	1
Ahrr	NM_001024285	chr1:31603296-31698329	0.075888	0	#NAME?	0	1	1	0.0734206	0.0490151	-0.582959	0	1	1	0	0.0324441	inf	0	1	1	0.0470102	0.0315943	-0.573306	0	1	1
Ahsa1	NM_001115034	chr6:111296416-111304224	231.552	228.227	-0.0208711	-0.0810813	0.9073	0.96663	223.463	202.467	-0.142351	-0.553528	0.43605	0.652258	221.386	220.515	-0.00568519	-0.0203281	0.9782	0.992756	194.611	215.254	0.145444	0.522765	0.46095	0.79252
Ahsa2	NM_001107241	chr14:108060652-108273966	14.4747	9.30908	-0.636818	-1.31385	0.0641	0.304063	13.9551	10.075	-0.470002	-1.0104	0.15225	0.385908	9.02312	14.0408	0.637925	1.1567	0.1065	0.442347	9.69586	13.707	0.499467	0.94435	0.1806	0.63571
Ahsg	NM_012898	chr11:81711268-81717594	0	0	0	0	1	1	0	0	0	0	1	1	0	0	0	0	1	1	0	0	0	0	1	1
Ahsp	NM_001106299	chr1:199720037-199721010	5.09369	5.34451	0.0693464	0.0363422	0.96155	0.985405	4.91485	6.05656	0.30135	0.15975	0.8257	0.906337	5.1881	0	#NAME?	#NAME?	0.0001	0.00359969	5.8219	0	#NAME?	#NAME?	5e-05	0.00359193
aicda	NM_001100779	chr4:155359908-155371104	0	0	0	0	1	1	0	0	0	0	1	1	0	0	0	0	1	1	0	0	0	0	1	1
Aida	NM_001127600	chr13:101698095-101724928	10.3534	11.2626	0.121436	0.263097	0.70985	0.881822	9.9816	13.2397	0.407533	0.881308	0.2152	0.46318	10.9178	8.79157	-0.312491	-0.576541	0.42915	0.733467	12.7373	8.57223	-0.57132	-1.06666	0.14265	0.583197
Aif1	NM_017196	chr20:5161349-5163249	332.247	386.577	0.218499	0.769184	0.28435	0.623689	320.491	485.54	0.599306	2.15276	0.0044	0.0357706	374.897	456.046	0.282682	0.933438	0.1842	0.546518	467.253	445.011	-0.0703622	-0.243096	0.73435	0.909411
Aif1l	NM_001108578	chr3:9237943-9262628	1.51178	1.44612	-0.0640559	-0.0592325	0.9316	0.975724	1.45735	1.35592	-0.104079	-0.0898573	0.89725	0.942218	1.40358	1.8741	0.417088	0.347651	0.6384	0.845137	1.30419	1.83093	0.489426	0.400942	0.5598	0.835869
Aifm1	NM_031356	chrX:135304062-135343062	25.5495	16.711	-0.6125	-1.35842	0.05265	0.271321	24.6663	22.6446	-0.123376	-0.278865	0.6914	0.829619	16.1909	24.3167	0.586763	1.12725	0.11	0.44795	21.7603	23.7493	0.126187	0.251757	0.72275	0.90535
Aifm2	NM_001139483	chr20:31339786-31352911	3.75246	3.69868	-0.0208258	-0.0295966	0.966	0.986559	3.62227	1.31908	-1.45736	-1.44252	0.0394	0.169437	3.58771	3.33988	-0.103267	-0.121805	0.86675	0.94946	1.27022	3.26131	1.36038	1.13159	0.1003	0.517657
Aifm3	NM_001013977	chr11:87365972-87380705	19.8216	19.0089	-0.0604008	-0.13424	0.85075	0.942179	19.1368	28.7648	0.587955	1.37788	0.0661	0.236463	18.4486	15.2026	-0.279198	-0.526101	0.47825	0.761686	27.6238	14.8585	-0.894622	-1.79435	0.0273	0.318298
Aig1	NM_001134425	chr1:7816840-8038609	55.6219	70.5567	0.343129	1.03916	0.13595	0.451674	53.624	71.8712	0.422535	1.24807	0.07475	0.254663	68.4422	43.7199	-0.646595	-1.68367	0.0183	0.17157	69.1359	42.664	-0.696415	-1.78072	0.01255	0.222287
Aimp1	NM_053757	chr2:237727781-237751327	143.549	147.11	0.0353537	0.114041	0.87615	0.9534	138.515	195.196	0.494878	1.60813	0.02615	0.128751	142.667	167.967	0.235528	0.703183	0.3194	0.656879	187.702	163.857	-0.196008	-0.603434	0.3872	0.756614
Aimp2	NM_001037348	chr12:12738854-12748345	80.6527	111.403	0.46599	1.42019	0.0563	0.282175	77.8787	88.5239	0.184839	0.528705	0.46695	0.676812	108.198	72.9307	-0.569079	-1.54167	0.03825	0.261341	85.091	71.2028	-0.257073	-0.665336	0.35935	0.743588
Aip	NM_172327	chr1:219348720-219369587	36.2832	49.5656	0.450037	0.933722	0.18745	0.529659	35.0208	43.9849	0.328797	0.698295	0.33395	0.565655	48.1065	31.2516	-0.6223	-1.13617	0.1197	0.4635	42.2802	30.5114	-0.470633	-0.883361	0.22555	0.673042
Aipl1	NM_021590	chr10:58599855-58608907	4.86502	1.75038	-1.47478	-0.962967	0.17325	0.510498	4.69928	1.13924	-2.04436	-1.16285	0.03565	0.158185	1.6978	2.51436	0.566523	0.310698	0.6616	0.857212	1.09856	2.45548	1.16039	0.568929	0.4634	0.793322
Aire	NM_001106379	chr20:11365696-11380631	0	0	0	0	1	1	0	0	0	0	1	1	0	0	0	0	1	1	0	0	0	0	1	1
Ajap1	NM_001101014	chr5:170615884-170679315	16.3725	21.5048	0.393386	0.970154	0.1798	0.519333	15.7995	11.5564	-0.451188	-0.950039	0.18585	0.428744	20.8754	19.8925	-0.0695734	-0.159362	0.82465	0.931426	11.1086	19.4154	0.805526	1.56093	0.0349	0.349077
Ajuba	NM_053503	chr15:33208209-33218456	0	0.299419	inf	0	1	1	0	0.272008	inf	0	1	1	0.291212	0.336566	0.208821	0	1	1	0.262298	0.328934	0.32659	0	1	1
Ak1	NM_024349	chr3:11652142-11659129	25.3724	32.2864	0.347665	0.949653	0.19815	0.54425	24.4694	21.4411	-0.190601	-0.461812	0.52005	0.71497	31.3459	18.7425	-0.741965	-1.62937	0.0264	0.212055	20.6156	18.2931	-0.172433	-0.343712	0.62645	0.865826
Ak2	NM_001033967	chr5:147185473-147204050	8.88587	4.57951	-0.95632	-0.99828	0.17525	0.513032	8.57695	2.05561	-2.0609	-1.45326	0.0856	0.276824	4.44337	8.28525	0.898889	0.886838	0.20765	0.571592	1.97341	8.08799	2.03509	1.49675	0.06555	0.443104
Ak2	NM_030986	chr5:147185473-147204050	17.791	36.9305	1.05367	1.1966	0.1029	0.398189	17.1648	38.1369	1.15174	1.26049	0.09235	0.289161	35.8409	13.5952	-1.39851	-1.56343	0.0394	0.264245	36.6135	13.2689	-1.46433	-1.59344	0.04415	0.378679
Ak3	NM_013218	chr1:247144488-247169690	98.3606	93.6923	-0.0701501	-0.212763	0.7658	0.906622	94.9443	83.9736	-0.177146	-0.515276	0.4679	0.677602	90.9168	77.1923	-0.236091	-0.614761	0.3818	0.706815	80.7203	75.3335	-0.09964	-0.251552	0.7179	0.903492
Ak4	NM_017135	chr5:120250769-120305703	2.36407	0.482587	-2.29241	-0.875695	0.31105	0.644187	2.27937	0.240141	-3.24668	-1.19909	0.26175	0.501798	0.467211	3.49288	2.90227	1.07192	0.255	0.612757	0.231257	3.40229	3.87894	1.40207	0.31715	0.720497
Ak6	NM_001012463	chr2:30664406-30676464	31.0035	42.6934	0.461582	0.712093	0.31985	0.649697	29.9248	44.5734	0.574839	0.883841	0.21375	0.461897	41.4123	25.9646	-0.673511	-0.90137	0.19865	0.563849	42.8546	25.3393	-0.758075	-1.01499	0.1479	0.591032
Ak7	NM_001108055	chr6:129539074-129606939	0.277789	0	#NAME?	0	1	1	0.268728	1.72106	2.67908	1.25857	0.2853	0.519424	0	0.568148	inf	0	1	1	1.65235	0.553456	-1.57797	-0.862069	0.2157	0.663615
Ak8	NM_001004266	chr3:7279428-7394509	0.687289	1.38239	1.00818	0.476113	0.45345	0.745509	0.662219	2.15352	1.70132	0.812633	0.30735	0.539947	1.33752	0.419865	-1.67157	-0.7365	0.3377	0.672001	2.07665	0.409564	-2.34209	-1.05769	0.3044	0.713469
Akap1	NM_053665	chr10:76151911-76166251	2.25111	1.73226	-0.377981	-0.318822	0.6485	0.851235	2.17328	1.70552	-0.349659	-0.284111	0.647	0.80122	1.67885	1.19078	-0.495566	-0.274018	0.66875	0.860317	1.64214	1.16091	-0.500326	-0.276585	0.6582	0.877333
Akap10	NM_001114606	chr10:48150901-48210074	2.95583	2.1105	-0.485979	-0.603003	0.38525	0.701752	2.85077	2.80629	-0.0226891	-0.0296103	0.965	0.979369	2.04939	3.03969	0.568734	0.632735	0.36385	0.692021	2.6973	2.96795	0.137948	0.154334	0.827	0.944047
Akap11	NM_012773	chr15:60722159-60752106	59.4975	35.3553	-0.750904	-3.04262	5e-05	0.0023396	57.4011	28.3887	-1.01576	-4.2031	5e-05	0.000964063	34.277	41.8488	0.287944	1.0722	0.1258	0.468157	27.297	40.8406	0.581259	2.18833	0.0019	0.069105
Akap12	NM_001033653	chr1:40816129-40906582	1.33757	1.22821	-0.123057	-0.0625909	0.90475	0.965549	1.28743	0.920698	-0.483695	-0.238826	0.69715	0.834008	1.19125	2.03017	0.769119	0.602919	0.35435	0.683474	0.884779	1.97999	1.1621	0.837514	0.2337	0.678537
Akap12	NM_057103	chr1:40816129-40906582	3.72403	2.52872	-0.558459	-0.626685	0.39815	0.710427	3.6003	2.14219	-0.749028	-0.816076	0.27055	0.507747	2.44988	2.11224	-0.213939	-0.228556	0.7505	0.898358	2.06143	2.0619	0.000331655	0.000341134	0.99765	0.998773
Akap13	NM_001106271	chr1:137014271-137315272	3.1643	1.55349	-1.02637	-2.0617	0.0063	0.0754323	3.05571	2.12234	-0.52585	-1.08634	0.13855	0.364584	1.50854	2.52194	0.741384	1.25366	0.0776	0.382123	2.03946	2.46228	0.271805	0.481734	0.5012	0.809733
Akap14	NM_021703	chrX:123773429-123788898	0.239963	0.0520431	-2.20503	0	1	1	0.231123	0.857931	1.8922	0.730499	0.35595	0.585985	0.0506092	0	#NAME?	0	1	1	0.822643	0	#NAME?	#NAME?	0.1163	0.546211
Akap17a	NM_001127246	chr12:18527115-18531161	66.0411	77.8639	0.237589	0.830213	0.25945	0.603518	63.7649	101.841	0.675491	2.56338	0.00155	0.0161805	75.5993	100.375	0.408949	1.40392	0.06565	0.350584	97.8209	98.0105	0.00279355	0.0108974	0.98855	0.995399
Akap2	NM_001011974	chr5:74942090-74985789	8.62309	2.15727	-1.999	-2.10203	0.0156	0.134778	8.32288	1.28883	-2.69102	-1.6662	0.20485	0.453619	2.08991	4.69479	1.16762	0.853634	0.29605	0.639877	1.24267	4.58976	1.88497	0.995692	0.32235	0.72352
Akap2	NM_001309260	chr5:74942090-74985789	33.3942	8.35662	-1.99861	-5.31447	5e-05	0.0023396	32.2136	10.4539	-1.62362	-4.4993	5e-05	0.000964063	8.10775	18.9366	1.22381	2.58711	0.0002	0.00633859	10.0512	18.4793	0.878535	1.92353	0.00555	0.137224
Akap3	NM_001005557	chr4:159403500-159425512	0	0.709764	inf	#NAME?	0.0001	0.00395203	0	1.00932	inf	#NAME?	5e-05	0.000964063	0.687672	0.343529	-1.00129	-0.445491	0.5473	0.798098	0.973297	0.336046	-1.53422	-0.665828	0.42865	0.777079
Akap4	NM_024402	chrX:16296029-16306078	0	0	0	0	1	1	0	0	0	0	1	1	0	0	0	0	1	1	0	0	0	0	1	1
Akap5	NM_133515	chr6:99356508-99361909	26.2995	41.1478	0.645779	1.80147	0.01395	0.125722	25.3893	48.0774	0.921138	2.49186	0.00085	0.0101575	39.9089	54.9423	0.461209	1.31288	0.06545	0.350478	46.2411	53.6111	0.213356	0.612766	0.37875	0.75385
Akap6	NM_022618	chr6:73553209-73990534	12.2664	6.54226	-0.906858	-2.63828	0.0004	0.0106345	11.8336	6.93234	-0.77147	-2.24493	0.00225	0.021375	6.34172	9.35967	0.561582	1.41864	0.04755	0.293893	6.66416	9.13427	0.454865	1.16116	0.09905	0.514967
Akap7	NM_001001801	chr1:21142143-21263850	4.643	2.05531	-1.1757	-0.72922	0.32245	0.652147	4.48156	2.13853	-1.06738	-0.660519	0.34535	0.575814	1.99287	1.91765	-0.05551	-0.0297961	0.9633	0.987772	2.05496	1.87141	-0.134984	-0.0702115	0.90925	0.974582
Akap8	NM_053855	chr7:14323299-14339853	8.72819	8.46358	-0.0444138	-0.0897545	0.9003	0.964481	8.42582	8.26834	-0.0272194	-0.0529717	0.94155	0.966447	8.20716	10.5528	0.362676	0.670949	0.33205	0.667822	7.94776	10.3036	0.374534	0.677563	0.33475	0.730593
Akap8l	NM_001013946	chr7:14340168-14369821	143.271	61.9497	-1.20958	-4.07272	5e-05	0.0023396	138.349	59.5775	-1.21547	-4.02991	5e-05	0.000964063	60.1054	126.314	1.07145	3.23944	5e-05	0.0020606	57.2313	123.321	1.10755	3.3113	5e-05	0.00359193
Akap9	NM_001037093	chr4:27195345-27331582	16.9367	12.0559	-0.490412	-1.75048	0.01265	0.119435	16.341	11.9704	-0.449028	-1.58848	0.02665	0.130066	11.6946	16.0005	0.452274	1.45669	0.0383	0.261377	11.5061	15.6039	0.439506	1.41551	0.04655	0.388454
Akip1	NM_001108497	chr1:174330694-174350196	6.30315	9.65069	0.61456	0.964624	0.1778	0.516618	6.08711	9.50929	0.643579	0.96216	0.17305	0.413024	9.36255	6.60352	-0.503666	-0.665418	0.3438	0.676293	9.14562	6.44648	-0.50457	-0.664428	0.329	0.727574
Akirin1	NM_001030054	chr5:141415225-141430627	18.6826	26.3437	0.495768	1.31994	0.06325	0.301507	18.015	31.6505	0.813029	2.16124	0.0031	0.0272016	25.5711	20.6824	-0.306114	-0.740447	0.303	0.645459	30.4355	20.1926	-0.591926	-1.45027	0.03975	0.367131
Akirin2	NM_001039914	chr5:50002194-50016537	64.9499	91.425	0.493262	1.64798	0.0203	0.156127	62.6738	93.8826	0.582996	1.97694	0.0078	0.0540103	88.7081	59.2065	-0.583311	-1.76731	0.01355	0.143406	90.2085	57.8163	-0.641787	-1.99234	0.0067	0.151945
Akna	NM_001108668	chr5:79184087-79222687	1.37479	1.366	-0.0092577	-0.0104049	0.991	0.995852	1.32834	1.21648	-0.126915	-0.121869	0.87015	0.930048	1.3285	2.26038	0.766775	0.832815	0.3349	0.670547	1.1701	2.20812	0.916187	0.910411	0.22545	0.673042
Aknad1	NM_001044303	chr2:211546559-211585332	0	0	0	0	1	1	0	0	0	0	1	1	0	0	0	0	1	1	0	0	0	0	1	1
Aknad1	NR_073134	chr2:211546559-211585332	0.185347	0	#NAME?	0	1	1	0.178337	0	#NAME?	0	1	1	0	0	0	0	1	1	0	0	0	0	1	1
Akp3	NM_022680	chr9:94228959-94232001	0	0	0	0	1	1	0	0	0	0	1	1	0	0	0	0	1	1	0	0	0	0	1	1
Akr1a1	NM_031000	chr5:135482067-135498693	683.812	858.648	0.328467	1.40913	0.04185	0.237536	659.933	694.59	0.0738419	0.336468	0.62735	0.788678	833.234	705.904	-0.239249	-0.969801	0.1651	0.525009	667.844	688.896	0.0447754	0.192116	0.7807	0.928275
Akr1b1	NM_012498	chr4:61706865-61720959	79.241	71.0797	-0.156808	-0.480255	0.5015	0.773926	76.4716	59.4672	-0.36283	-1.04029	0.142	0.369761	68.9789	39.0653	-0.820267	-1.95392	0.0063	0.0887402	57.1725	38.1353	-0.584196	-1.31202	0.06535	0.443104
Akr1b10	NM_001013084	chr4:61813264-61828658	0.459791	0.902521	0.972982	0.474847	0.3945	0.707848	0.444128	1.3131	1.56393	0.777264	0.30335	0.535729	0.875279	0.147424	-2.56977	-0.907373	0.26095	0.61746	1.2633	0.144213	-3.13092	-1.13217	0.2274	0.674733
Akr1b7	NM_053781	chr4:61850490-61862531	0	0	0	0	1	1	0	0	0	0	1	1	0	0	0	0	1	1	0	0	0	0	1	1
Akr1b8	NM_173136	chr4:61772063-61784637	0	0	0	0	1	1	0	0	0	0	1	1	0	0	0	0	1	1	0	0	0	0	1	1
Akr1c1	NM_001033697	chr17:69441252-69460287	0	0	0	0	1	1	0	0	0	0	1	1	0	0	0	0	1	1	0	0	0	0	1	1
Akr1c12	NM_001170342	chr17:69634889-69647772	0	0	0	0	1	1	0	0	0	0	1	1	0	0	0	0	1	1	0	0	0	0	1	1
Akr1c12l1	NM_001135744	chr17:69588118-69599168	0	0	0	0	1	1	0	0	0	0	1	1	0	0	0	0	1	1	0	0	0	0	1	1
Akr1c13	NM_001014240	chr17:69695533-69711654	0.140871	0.786099	2.48033	0.988809	0.2998	0.635558	0.135668	0.0527385	-1.36315	0	1	1	0.762277	0	#NAME?	#NAME?	0.0387	0.262113	0.0508558	0	#NAME?	0	1	1
Akr1c14	NM_138547	chr17:69806094-69827125	1.1212	0.781052	-0.521553	-0.282374	0.71935	0.887466	1.07912	2.4766	1.1985	0.826744	0.24105	0.486159	0.757304	0.131506	-2.52574	-0.924877	0.2984	0.642111	2.3786	0.128597	-4.20918	-1.61271	0.22355	0.670858
Akr1c19	NM_001100576	chr17:69654169-69675203	1.04962	1.47376	0.489633	0.26222	0.7067	0.880745	1.01087	1.28552	0.346755	0.189698	0.76265	0.871398	1.43052	0.0211958	-6.07662	-1.86195	0.1652	0.525009	1.23944	0.0206401	-5.9081	-1.84178	0.3634	0.746154
Akr1c2	NM_001013057	chr17:69388344-69435148	0	0	0	0	1	1	0	0	0	0	1	1	0	0	0	0	1	1	0	0	0	0	1	1
Akr1c3	NM_138510	chr17:69761125-69778021	0.37543	0	#NAME?	0	1	1	0.363187	0	#NAME?	0	1	1	0	0	0	0	1	1	0	0	0	0	1	1
Akr1cl	NM_001109900	chr17:69835337-69862093	2.15688	3.39344	0.653807	0.353767	0.6028	0.827619	2.08515	3.61216	0.792709	0.488994	0.48985	0.692748	3.29484	0.760877	-2.11447	-0.995175	0.28725	0.634501	3.48087	0.74412	-2.22584	-0.982607	0.358	0.742951
Akr1d1	NM_138884	chr4:65110705-65143930	0	0	0	0	1	1	0	0	0	0	1	1	0	0	0	0	1	1	0	0	0	0	1	1
Akr1e2	NM_001008342	chr17:69365459-69379940	27.1285	20.4461	-0.407982	-0.784645	0.2698	0.610217	26.1788	16.1393	-0.697827	-1.20858	0.09225	0.288925	19.8263	15.9472	-0.314114	-0.46783	0.5104	0.778856	15.5323	15.5623	0.00278661	0.0038621	0.9953	0.997802
Akr7a2	NM_134407	chr5:157759447-157768473	61.0297	33.6266	-0.859908	-2.1474	0.00525	0.0674144	58.9222	25.5853	-1.20349	-2.74139	0.0011	0.0122696	32.6492	54.9642	0.751447	1.67382	0.03385	0.244757	24.5988	53.6983	1.12629	2.27359	0.0054	0.134895
Akr7a3	NM_013215	chr5:157801162-157813754	5.23316	2.64339	-0.985292	-0.794018	0.26055	0.603518	5.0522	4.61056	-0.131971	-0.116943	0.86155	0.926209	2.56625	3.82632	0.576295	0.35812	0.60105	0.82442	4.43178	3.73671	-0.246114	-0.147493	0.82925	0.944864
Akt1	NM_033230	chr6:137219130-137236201	90.4074	47.5778	-0.926153	-2.55233	0.00095	0.0208501	87.2702	27.8431	-1.64817	-3.90079	5e-05	0.000964063	46.1649	46.9133	0.0232028	0.0518195	0.9425	0.98015	26.7635	45.7996	0.775066	1.51231	0.03725	0.358133
Akt1s1	NM_001106259	chr1:100845562-100851961	33.9192	38.6248	0.187424	0.524703	0.50035	0.773376	32.734	34.2476	0.0652154	0.176341	0.8189	0.902507	37.5153	40.367	0.105698	0.273413	0.7329	0.890733	32.9194	39.4118	0.259689	0.656067	0.394	0.761216
Akt2	NM_017093	chr1:84411725-84450162	5.79032	1.60054	-1.85508	-1.57008	0.02645	0.182868	5.59025	4.24878	-0.395862	-0.410192	0.5536	0.738841	1.55076	4.82349	1.6371	1.0246	0.1336	0.479439	4.08878	4.7088	0.203689	0.178763	0.80305	0.936487
Akt3	NM_031575	chr13:95087449-95348913	7.00272	4.14971	-0.754902	-0.769268	0.2889	0.626176	6.75523	3.53704	-0.933464	-0.73115	0.2884	0.521424	4.02144	5.977	0.571707	0.5076	0.5057	0.775846	3.39911	5.82711	0.777622	0.616512	0.3467	0.737216
Aktip	NM_001011926	chr19:17290177-17300052	88.3074	76.9741	-0.198162	-0.70326	0.3223	0.652147	85.2304	67.7566	-0.331006	-1.14342	0.1093	0.319851	74.6807	85.1965	0.190058	0.606273	0.39135	0.713711	65.1284	83.1566	0.352543	1.1053	0.11985	0.550959
Alad	NM_012899	chr5:78368867-78379206	53.1616	57.8483	0.121892	0.336432	0.648	0.85102	51.3307	38.4706	-0.416067	-1.04417	0.16855	0.407153	56.1507	61.6212	0.134123	0.338832	0.6486	0.851009	36.9727	60.1851	0.702945	1.64047	0.03755	0.358928
Alas1	NM_024484	chr8:114927705-114941038	18.3163	16.5842	-0.143318	-0.292968	0.6821	0.865926	17.6923	12.6773	-0.480866	-0.909687	0.20505	0.453658	16.0919	16.4321	0.03019	0.0526907	0.94075	0.979727	12.1836	16.0425	0.396955	0.647717	0.38535	0.755877
Alas2	NM_013197	chrX:23167575-23187356	0.0176558	0	#NAME?	0	1	1	0.017066	0.156882	3.20048	0	1	1	0	0.339842	inf	0	1	1	0.150474	0.332136	1.14226	0	1	1
Alb	NM_134326	chr14:19176274-19191793	1.61525	1.91526	0.24578	0.183538	0.7928	0.918045	1.55969	4.21376	1.43385	0.884772	0.20025	0.44843	1.85952	3.54138	0.929379	0.579721	0.38565	0.709102	4.05215	3.45805	-0.228733	-0.179792	0.807	0.937423
Alcam	NM_031753	chr11:50781126-50985083	31.9731	36.8347	0.204207	0.653253	0.35485	0.678087	30.8464	22.164	-0.476886	-1.38177	0.0482	0.193975	35.7146	16.1461	-1.14533	-2.99162	0.0001	0.00359969	21.3122	15.7518	-0.436163	-1.03787	0.14775	0.591032
Aldh16a1	NM_001033706	chr1:101138247-101151320	10.9443	9.88733	-0.146523	-0.273717	0.69795	0.876158	10.5644	8.70553	-0.279204	-0.506637	0.51795	0.712736	9.59313	12.6761	0.402037	0.647774	0.33755	0.672001	8.36615	12.3637	0.563473	0.899562	0.2124	0.66016
Aldh18a1	NM_001108524	chr1:259057412-259089632	0.118313	0.091279	-0.374248	0	1	1	0.114152	0.120712	0.0806084	0	1	1	0.0886615	0.142482	0.684397	0	1	1	0.115981	0.139195	0.263227	0	1	1
Aldh18a1	NM_001108524_1	chr1:259641678-259674426	0.109647	0.091279	-0.264516	0	1	1	0.105802	0.120712	0.190203	0	1	1	0.0886615	0.149328	0.752104	0	1	1	0.115981	0.145862	0.330721	0	1	1
Aldh1a1	NM_022407	chr1:238222688-238264381	11.5023	13.6513	0.247114	0.465613	0.5057	0.775878	11.0976	7.87807	-0.494338	-0.790147	0.2623	0.502113	13.2353	6.08991	-1.1199	-1.56698	0.02965	0.226166	7.57594	5.94341	-0.350135	-0.420981	0.5399	0.825771
Aldh1a2	NM_053896	chr8:77640233-77719488	9.08656	5.52672	-0.71731	-1.10399	0.11155	0.412741	8.76712	3.90268	-1.16764	-1.50097	0.0398	0.17047	5.36417	6.94919	0.373488	0.457084	0.51975	0.782474	3.75547	6.78501	0.853355	0.92327	0.18515	0.638696
Aldh1a3	NM_153300	chr1:127302919-127337828	0	0	0	0	1	1	0	0	0	0	1	1	0	0	0	0	1	1	0	0	0	0	1	1
Aldh1a7	NM_017272	chr1:239741571-240757583	0.0155341	0.485575	4.96619	0	1	1	0.0149406	0.0117516	-0.346379	0	1	1	0.469762	0	#NAME?	0	1	1	0.0112687	0	#NAME?	0	1	1
Aldh1b1	NM_001011975	chr5:61382350-61387359	15.141	14.5688	-0.0555839	-0.107911	0.8844	0.956696	14.6131	6.17191	-1.24347	-1.81684	0.02035	0.107898	14.1475	11.4563	-0.304396	-0.484495	0.49945	0.773173	5.93317	11.1797	0.914011	1.12746	0.10375	0.525152
Aldh1l1	NM_022547	chr4:123516552-123557525	4.87187	2.96164	-0.718078	-0.809848	0.24535	0.592263	4.70276	5.57676	0.245921	0.307581	0.65675	0.807539	2.87365	4.6354	0.689812	0.688155	0.32255	0.659058	5.36354	4.52682	-0.244686	-0.26434	0.71895	0.903535
Aldh1l2	NM_001191778	chr7:26375865-26425838	0.0741067	0.685522	3.20953	1.2703	0.2637	0.605683	0.0714084	0	#NAME?	0	1	1	0.663292	0	#NAME?	#NAME?	5e-05	0.0020606	0	0	0	0	1	1
Aldh2	NM_032416	chr12:40466494-40498757	80.7299	52.4726	-0.621539	-1.87871	0.0086	0.0925509	77.9243	42.0401	-0.890307	-2.59735	0.001	0.0114482	50.9	60.8433	0.257435	0.686309	0.33535	0.670568	40.4116	59.414	0.556035	1.43382	0.0555	0.412912
Aldh3a1	NM_031972	chr10:47490167-47499855	0	1.17943	inf	#NAME?	0.00015	0.00511574	0	0.228431	inf	0	1	1	1.14658	0.307918	-1.89672	-0.832808	0.33655	0.671086	0.220278	0.300294	0.447048	0	1	1
Aldh3a2	NM_031731	chr10:47525492-47546037	26.2769	24.4976	-0.101152	-0.28857	0.68705	0.868314	25.3504	19.3168	-0.39215	-1.03884	0.14355	0.372309	23.7804	19.2241	-0.306855	-0.744157	0.28445	0.632617	18.5618	18.7671	0.0158665	0.0358473	0.95945	0.988032
Aldh3b1	NM_001006998	chr1:219145456-219168177	30.3675	22.7945	-0.41384	-0.959201	0.18615	0.528169	29.312	36.6383	0.321864	0.808663	0.2678	0.506113	22.1231	43.0987	0.962095	2.13411	0.0059	0.084848	35.2059	42.0939	0.257794	0.64733	0.4057	0.766344
Aldh4a1	NM_001134698	chr5:158090237-158115725	7.84072	4.90348	-0.67718	-1.14102	0.11715	0.421409	7.56919	6.0922	-0.313174	-0.565367	0.4891	0.692465	4.7582	8.40421	0.820697	1.21815	0.09385	0.417998	5.84894	8.20996	0.4892	0.793637	0.3511	0.739154
Aldh5a1	NM_022851	chr17:42133075-42159412	12.7254	9.87019	-0.366562	-1.07509	0.13335	0.447484	12.2739	7.36097	-0.737625	-1.98166	0.00525	0.0408399	9.57324	11.2614	0.234302	0.59923	0.3942	0.714952	7.07546	10.9917	0.635514	1.50094	0.03335	0.342583
Aldh6a1	NM_031057	chr6:108123854-108167185	12.5396	7.68379	-0.706606	-1.36976	0.0526	0.271303	12.088	7.07515	-0.772739	-1.44322	0.04295	0.179391	7.44746	8.63363	0.213218	0.36937	0.5914	0.820293	6.80773	8.43013	0.30838	0.517857	0.4558	0.789622
Aldh7a1	NM_001271105	chr18:51619006-51651267	34.2813	21.9356	-0.644148	-1.48432	0.0312	0.199325	33.0717	18.9675	-0.802066	-1.74115	0.01845	0.100975	21.2714	15.3617	-0.469575	-0.816059	0.2313	0.598404	18.2278	14.9971	-0.281456	-0.467262	0.51225	0.813907
Aldh8a1	NM_001191088	chr1:16910089-16929304	0	0	0	0	1	1	0	0	0	0	1	1	0	0	0	0	1	1	0	0	0	0	1	1
Aldh9a1	NM_022273	chr13:85580827-85597495	5.51748	6.24111	0.177792	0.254871	0.7107	0.882191	5.32114	2.26257	-1.23377	-1.27427	0.0735	0.252532	6.05251	2.60554	-1.21595	-1.22411	0.0823	0.393065	2.17706	2.54439	0.22494	0.159657	0.8249	0.943139
Aldoa	NM_001177305	chr1:198228386-198233588	1559.49	1587.34	0.0255426	0.103927	0.8881	0.958483	1505.97	1602.79	0.0898932	0.434114	0.5637	0.745312	1540.57	1495.93	-0.0424215	-0.168855	0.8156	0.927581	1540.49	1460.51	-0.0769145	-0.361267	0.61855	0.86205
Aldoa	NM_001271536	chr1:198228386-198233588	43.5511	25.7748	-0.756746	-0.432839	0.5574	0.805909	41.9935	15.9816	-1.39376	-0.812976	0.3205	0.552045	25.0225	14.5398	-0.783221	-0.363775	0.69665	0.874913	15.3581	14.1905	-0.114073	-0.0547502	0.64865	0.873171
Aldoa	NM_012495	chr1:198228386-198233588	157.322	150.643	-0.0625853	-0.0660424	0.9347	0.976069	152.056	73.1323	-1.05602	-1.09884	0.2182	0.466015	146.4	92.0749	-0.669041	-0.617618	0.47485	0.76046	70.2522	89.9652	0.356824	0.323874	0.7201	0.903817
Aldoart2	NM_001013943	chr6:76349361-76351052	0.172367	0.105679	-0.705798	0	1	1	0.166261	0.107399	-0.630471	0	1	1	0.102557	0.137935	0.42756	0	1	1	0.103258	0.134807	0.384633	0	1	1
Aldob	NM_012496	chr5:64805771-64818813	0.493732	2.01434	2.02851	0.951931	0.37985	0.696344	0.477707	0.628078	0.394818	0	1	1	1.95911	0	#NAME?	#NAME?	5e-05	0.0020606	0.602329	0	#NAME?	0	1	1
Aldoc	NM_012497	chr10:65586503-65590093	837.172	658.648	-0.346016	-1.53645	0.0372	0.22225	808.347	583.847	-0.469382	-2.31213	0.00175	0.0177929	639.257	639.053	-0.000459812	-0.00194683	0.9977	0.998949	561.116	624.008	0.153265	0.708786	0.3411	0.734365
Alg1	NM_001108264	chr10:10530364-10550138	10.5503	9.87216	-0.0958438	-0.142998	0.84475	0.940006	10.1847	9.45745	-0.106881	-0.151095	0.8354	0.912141	9.58017	9.87888	0.0442966	0.0592496	0.944	0.98101	9.09158	9.66173	0.0877498	0.115081	0.89205	0.967594
Alg10	NM_139101	chr7:131330912-131336183	0.205804	0.470972	1.19437	0	1	1	0.198598	0.0333182	-2.57547	0	1	1	0.457581	0	#NAME?	0	1	1	0.0320919	0	#NAME?	0	1	1
Alg11	NM_001108401	chr16:74857585-74864831	14.075	16.547	0.233431	0.42264	0.54465	0.799185	13.582	10.4995	-0.371374	-0.591164	0.39735	0.620423	16.0568	11.048	-0.539396	-0.808913	0.2558	0.612978	10.1013	10.7841	0.0943664	0.129267	0.8518	0.952448
Alg12	NM_001108104	chr7:129798662-129812388	6.90678	8.84088	0.356176	0.535424	0.4521	0.744949	6.66328	12.0379	0.853282	1.28073	0.07765	0.261071	8.58643	5.4551	-0.654453	-0.792742	0.2566	0.613389	11.5659	5.31989	-1.12041	-1.38392	0.0426	0.375895
Alg13	NM_001013951	chrX:115561357-115569256	4.44304	5.60008	0.333901	0.453531	0.5145	0.779614	4.28092	8.15395	0.929579	1.32317	0.0734	0.252337	5.43519	3.91005	-0.475143	-0.560566	0.45195	0.747249	7.85417	3.80913	-1.044	-1.33828	0.0786	0.48049
Alg14	NM_001014176	chr2:224851382-224931461	9.30468	12.8994	0.471281	0.776333	0.26105	0.60363	8.96853	10.1873	0.183834	0.275758	0.68615	0.826015	12.5219	11.9081	-0.0725057	-0.112786	0.87925	0.953659	9.79144	11.6295	0.248195	0.345004	0.641	0.870298
Alg2	NM_001100710	chr5:63187465-63192025	61.9545	48.8467	-0.342948	-1.28586	0.06935	0.315787	59.7841	41.0969	-0.54073	-2.00491	0.0056	0.0430202	47.3905	53.5728	0.176903	0.602995	0.3937	0.714867	39.5079	52.3139	0.405053	1.36042	0.05645	0.416125
Alg3	NM_001142363	chr11:83986229-83991706	1.87693	4.75663	1.34156	0.872779	0.2453	0.592263	1.81033	0.00038263	-12.208	-0.107557	0.2193	0.467598	4.6093	0.911527	-2.33819	-0.832131	0.3029	0.645459	0.000356837	0.8875	11.2803	0.0998382	0.33825	0.731936
Alg3	NR_024535	chr11:83986229-83991706	7.97593	8.88978	0.156494	0.188382	0.7988	0.921081	7.69607	19.8348	1.36584	2.10211	0.0097	0.0636335	8.63475	9.35854	0.116129	0.131158	0.86265	0.947461	19.0513	9.13922	-1.05975	-1.57982	0.0583	0.422228
Alg5	NM_001025407	chr2:143932738-143946466	17.0536	27.0645	0.666323	1.31126	0.06685	0.310568	16.4399	15.0361	-0.128772	-0.219794	0.76005	0.869869	26.2564	13.0741	-1.00596	-1.64659	0.0253	0.206057	14.4737	12.7467	-0.183313	-0.263864	0.71915	0.903535
Alg6	NM_001033709	chr5:118415679-118470634	1.08675	1.78718	0.717659	0.704569	0.3037	0.63814	1.04586	1.02725	-0.0259152	-0.0199293	0.9759	0.984889	1.73304	1.36026	-0.349417	-0.306132	0.65925	0.855551	0.987582	1.32827	0.427575	0.328006	0.60585	0.856319
Alg8	NM_001034127	chr1:162342060-162362139	6.31052	6.87071	0.122702	0.189444	0.7954	0.919335	6.08876	1.46046	-2.05973	-1.92162	0.01845	0.100975	6.66992	0.910055	-2.87364	-2.14854	0.0223	0.191239	1.40409	0.888432	-0.660305	-0.357752	0.61955	0.862612
Alg9	NM_001109000	chr8:55202724-55265478	4.96618	6.25317	0.332452	0.496166	0.48425	0.762961	4.79161	9.00224	0.909775	1.38573	0.0579	0.219144	6.06586	4.51631	-0.425568	-0.531897	0.4363	0.738195	8.64822	4.40619	-0.972871	-1.26551	0.07745	0.475471
Alk	NM_001169101	chr6:22696414-23203777	3.6866	1.08412	-1.76576	-1.94834	0.01755	0.143066	3.55882	1.69383	-1.07111	-1.34698	0.0796	0.265477	1.05194	1.04796	-0.00547395	-0.00383872	0.9958	0.99854	1.62727	1.02151	-0.671746	-0.536475	0.4342	0.77884
Alkbh1	NM_001108718	chr6:111456998-111507782	3.43641	2.92295	-0.233473	-0.187597	0.7957	0.9195	3.31058	2.8002	-0.241555	-0.185839	0.7959	0.891091	2.83274	5.69197	1.00673	0.932709	0.18775	0.550598	2.69066	5.55728	1.04642	0.993787	0.16475	0.613478
Alkbh2	NM_001126273	chr12:48257608-48262244	29.6397	18.8699	-0.65144	-1.16661	0.1052	0.40157	28.6137	36.4684	0.349941	0.771405	0.36405	0.592578	18.3098	18.8799	0.0442302	0.0634074	0.92825	0.974191	35.0174	18.432	-0.925864	-1.58426	0.0577	0.420251
Alkbh3	NM_001014180	chr3:82874246-82906581	33.9075	55.4543	0.709697	1.68194	0.021	0.158591	32.7216	30.3812	-0.107063	-0.219572	0.75555	0.866749	53.8142	39.5196	-0.445419	-0.978342	0.1753	0.537632	29.2055	38.5852	0.401808	0.76859	0.2908	0.70376
Alkbh4	NM_001105920	chr12:23568203-23574133	7.19299	6.1403	-0.228282	-0.317576	0.6865	0.868087	6.94206	3.6797	-0.915778	-1.10554	0.1966	0.443988	5.96409	5.83239	-0.0322156	-0.0362719	0.96005	0.986612	3.53371	5.69373	0.688193	0.67034	0.42	0.772354
Alkbh5	NM_001191643	chr10:46906313-46927759	10.7026	5.4167	-0.982482	-1.33808	0.07205	0.323547	10.3327	11.579	0.164284	0.266467	0.7128	0.842923	5.26235	6.15366	0.225737	0.225862	0.7696	0.906834	11.1159	6.01594	-0.885758	-1.11088	0.144	0.585414
Alkbh6	NM_001127450	chr1:90820669-91285128	0.0978601	0.0303648	-1.68832	0	1	1	0.0945937	0.092799	-0.027635	0	1	1	0.0293813	0.026058	-0.173171	0	1	1	0.0892207	0.0253751	-1.81396	0	1	1
Alkbh6	NM_001127450_1	chr1:88766871-88772243	0.231463	0.0607296	-1.93031	0	1	1	0.223447	0.0729639	-1.61468	0	1	1	0.0587625	0.118921	1.01703	0	1	1	0.0700937	0.116211	0.729386	0	1	1
Alkbh7	NM_001109384	chr9:10045374-10047507	116.45	134.305	0.205798	0.666238	0.3545	0.677715	112.416	143.664	0.353854	1.14571	0.1159	0.330181	130.342	132.078	0.0190933	0.0574407	0.937	0.978372	138.081	128.981	-0.098365	-0.302322	0.68135	0.887599
Alkbh8	NM_001191909	chr6:18880736-18949393	1.5783	1.7528	0.151294	0.133608	0.84895	0.941239	1.52335	0.346271	-2.13727	-1.26822	0.07095	0.246663	1.69888	0.515015	-1.7219	-1.08571	0.12775	0.471538	0.333062	0.502442	0.593168	0	1	1
Allc	NM_001013037	chr6:47812992-47848026	0.164591	1.27417	2.9526	1.25961	0.28985	0.626972	0.15894	0.692649	2.12364	0.816012	0.5344	0.725761	1.23369	0.223584	-2.4641	-0.89343	0.2752	0.62792	0.667929	0.218723	-1.61059	-0.525884	0.6224	0.864118
Alms1	NM_001106604	chr4:117371543-117472310	1.31777	0.732065	-0.848058	-1.06832	0.1296	0.441228	1.27268	0.922894	-0.463633	-0.604066	0.3806	0.60589	0.709526	1.31314	0.888089	0.981387	0.1427	0.492189	0.888102	1.28222	0.529847	0.593532	0.39825	0.763433
Alox12	NM_001105798	chr10:56851733-56864005	0.138628	0.077557	-0.837886	0	1	1	0.133705	0	#NAME?	0	1	1	0.075431	0.205264	1.44425	0	1	1	0	0.199884	inf	0	1	1
Alox12b	NM_001039377	chr10:55744645-55756524	0.0623441	0.68483	3.45742	1.22769	0.2328	0.581279	0.0602545	0	#NAME?	0	1	1	0.663066	0	#NAME?	#NAME?	0.01845	0.171734	0	0	0	0	1	1
Alox12e	NM_001107014	chr10:56927675-56935141	0	0	0	0	1	1	0	0	0	0	1	1	0	0	0	0	1	1	0	0	0	0	1	1
Alox15	NM_031010	chr10:56953691-56962140	0.0305472	0	#NAME?	0	1	1	0.0295252	0.927351	4.97309	1.58348	0.2464	0.490166	0	0.906037	inf	#NAME?	0.01815	0.171126	0.893472	0.886243	-0.0117201	-0.00570077	0.6865	0.889144
Alox15b	NM_153301	chr10:55774172-55783489	0	0	0	0	1	1	0	0.275714	inf	0	1	1	0	0	0	0	1	1	0.265869	0	#NAME?	0	1	1
Alox5	NM_012822	chr4:148398891-148446273	3.22844	1.32726	-1.28239	-1.14363	0.1062	0.403615	3.11624	0.0842766	-5.20853	-2.33837	0.2512	0.493631	1.28879	0.59624	-1.11206	-0.570481	0.39305	0.714597	0.0811289	0.581429	2.84132	1.07747	0.2774	0.695162
Alox5ap	NM_017260	chr12:6854929-6879112	6.33922	4.25698	-0.574476	-0.514707	0.49955	0.773238	6.11885	3.1735	-0.947188	-0.622679	0.333	0.564535	4.13848	0.284473	-3.86274	-1.90493	0.26295	0.618795	3.05745	0.278052	-3.4589	-1.4508	0.2722	0.691548
Aloxe3	NM_001105793	chr10:55712845-55735914	2.06256	0.104932	-4.29691	-2.24637	0.25225	0.598519	1.9927	0.449873	-2.14714	-1.42535	0.0603	0.223772	0.101957	1.74575	4.09781	2.06701	0.25	0.610217	0.431973	1.70609	1.98168	1.1002	0.2827	0.696547
Alpi	NM_022665	chr9:94197617-94201084	0	0	0	0	1	1	0	0	0	0	1	1	0	0	0	0	1	1	0	0	0	0	1	1
Alpk3	NM_001191895	chr1:142883050-142930686	0.0591439	0	#NAME?	0	1	1	0.0570067	0.010863	-2.3917	0	1	1	0	0	0	0	1	1	0.0104751	0	#NAME?	0	1	1
Alpl	NM_013059	chr5:156086497-156141513	3.84848	3.32848	-0.209426	-0.243648	0.74565	0.900041	3.71666	2.99157	-0.313101	-0.325723	0.66835	0.81471	3.2352	2.383	-0.441077	-0.411329	0.5979	0.822615	2.87469	2.32874	-0.303853	-0.251378	0.7477	0.915183
Als2	NM_001013413	chr9:65962579-66033871	0.549757	0.391648	-0.489237	0	1	1	0.530409	0.414537	-0.355606	0	1	1	0.380055	1.30738	1.7824	1.22775	0.09895	0.427269	0.398445	1.27772	1.68112	1.07073	0.1525	0.597498
Als2cr11	NM_001024363	chr9:65833459-65879521	0	0	0	0	1	1	0	0	0	0	1	1	0	0	0	0	1	1	0	0	0	0	1	1
Als2cr12	NM_001014101	chr9:65665662-65693822	0	0	0	0	1	1	0	0.629851	inf	#NAME?	0.0001	0.00170145	0	2.1513	inf	#NAME?	5e-05	0.0020606	0.606801	2.09919	1.79054	0.832993	0.3315	0.728392
Alx1	NM_012921	chr7:44751865-44771458	0.0187625	0.579564	4.94905	0	1	1	0.0181345	0.033847	0.900291	0	1	1	0.560747	0	#NAME?	#NAME?	0.1229	0.466633	0.0324617	0	#NAME?	0	1	1
Alx3	NM_001007012	chr2:210376509-210386928	0.203413	0.733968	1.85131	0.68876	0.39335	0.707346	0.195876	0.0730343	-1.4233	0	1	1	0.71218	0	#NAME?	#NAME?	5e-05	0.0020606	0.070065	0	#NAME?	0	1	1
Alx4	NM_001106553	chr3:82548960-82585531	0	0	0	0	1	1	0	0	0	0	1	1	0	0	0	0	1	1	0	0	0	0	1	1
Alyref	NM_001109602	chr10:109770875-109774639	55.9778	85.5634	0.612138	1.79123	0.0119	0.115142	53.9814	62.7172	0.216399	0.594054	0.3987	0.621289	82.9933	73.8806	-0.1678	-0.468255	0.5122	0.77918	60.3257	72.1004	0.257236	0.683356	0.3347	0.730593
Amacr	NM_012816	chr2:60949275-60961342	26.8923	21.787	-0.303729	-0.627964	0.37135	0.691178	25.9634	13.7137	-0.920856	-1.63522	0.0235	0.119157	21.1311	23.4634	0.151047	0.266238	0.6999	0.875663	13.183	22.903	0.796854	1.23977	0.07995	0.481615
Ambn	NM_012900	chr14:21239888-21252534	0	0	0	0	1	1	0	0	0	0	1	1	0	0	0	0	1	1	0	0	0	0	1	1
Ambp	NM_012901	chr5:78975705-78985926	0	0	0	0	1	1	0	0	0	0	1	1	0	0	0	0	1	1	0	0	0	0	1	1
Ambra1	NM_001134341	chr3:80634469-80830068	12.9546	6.2533	-1.05078	-2.56353	0.001	0.0215433	12.5091	5.51178	-1.18239	-2.72367	0.00025	0.00367723	6.06709	17.5026	1.5285	3.40166	0.0001	0.00359969	5.30029	17.0961	1.68952	3.5529	0.0001	0.00646145
Amd1	NM_031011	chr20:45384000-45399694	50.7475	55.0303	0.116889	0.429182	0.5442	0.798952	48.9456	62.6466	0.356058	1.32627	0.0611	0.225456	53.3706	55.1369	0.0469715	0.159304	0.82475	0.931426	60.253	53.825	-0.162756	-0.568357	0.4181	0.771681
Amdhd1	NM_001191781	chr7:34362634-34406282	0	0	0	0	1	1	0	0	0	0	1	1	0	0.193019	inf	0	1	1	0	0.188806	inf	0	1	1
Amdhd2	NM_001024990	chr10:13528412-13536899	30.3824	14.7449	-1.04302	-2.10901	0.0113	0.111834	29.3339	13.9234	-1.07506	-1.99038	0.00655	0.0477523	14.3236	21.2381	0.568256	0.959244	0.2455	0.609459	13.3934	20.7595	0.632249	1.00142	0.1926	0.644931
Amelx	NM_001271073	chrX:26439196-26450495	0	0	0	0	1	1	0	0	0	0	1	1	0	0	0	0	1	1	0	0	0	0	1	1
Amelx	NM_001271074	chrX:26439196-26450495	0	0	0	0	1	1	0	0	0	0	1	1	0	0	0	0	1	1	0	0	0	0	1	1
Amelx	NM_001271075	chrX:26439196-26450495	0	0	0	0	1	1	0	0	0	0	1	1	0	0	0	0	1	1	0	0	0	0	1	1
Amelx	NM_001271076	chrX:26439196-26450495	0	0	0	0	1	1	0	0	0	0	1	1	0	0	0	0	1	1	0	0	0	0	1	1
Amelx	NM_001271077	chrX:26439196-26450495	0	0	0	0	1	1	0	0	0	0	1	1	0	0	0	0	1	1	0	0	0	0	1	1
Amelx	NM_001271078	chrX:26439196-26450495	0	0	0	0	1	1	0	0	0	0	1	1	0	0	0	0	1	1	0	0	0	0	1	1
Amelx	NM_019154	chrX:26439196-26450495	0	0	0	0	1	1	0	0	0	0	1	1	0	0	0	0	1	1	0	0	0	0	1	1
Amer1	NM_001109320	chrX:64686619-64702504	0.709328	0.325961	-1.12175	-0.568138	0.4022	0.713115	0.684313	0.223023	-1.61746	-0.785387	0.16395	0.401417	0.316598	0.505873	0.676126	0	1	1	0.214626	0.49285	1.19933	0	1	1
Amh	NM_012902	chr7:11775154-11777503	0	0	0	0	1	1	0	0	0	0	1	1	0	2.18924	inf	#NAME?	5e-05	0.0020606	0	2.14137	inf	#NAME?	0.0408	0.370403
Amhr2	NM_030998	chr7:144052201-144060678	0.184629	0.901707	2.28803	0.844659	0.31195	0.644495	0.178013	1.05979	2.57372	0.934982	0.27125	0.507884	0.877228	0.0860233	-3.35015	-1.03379	0.4536	0.748892	1.02194	0.0837665	-3.60879	-1.09263	0.20915	0.656945
Amigo1	NM_206881	chr2:210977981-210979463	1.40235	0.662446	-1.08197	-0.599335	0.40665	0.715102	1.35526	0.709903	-0.932874	-0.526433	0.3166	0.549039	0.644033	0.180166	-1.83781	0	1	1	0.681525	0.176239	-1.95123	-0.739388	0.51705	0.815436
Amigo2	NM_182816	chr7:138704124-138707221	5.00618	5.32534	0.0891646	0.143108	0.8405	0.93787	4.82904	1.09194	-2.14484	-1.7901	0.02465	0.123492	5.16712	0.844757	-2.61275	-1.73926	0.0492	0.300892	1.05251	0.824246	-0.352689	-0.2001	0.74075	0.912311
Amigo3	NM_178144	chr8:116826679-116856548	1.12179	0.569726	-0.977466	-0.340238	0.7383	0.896381	1.08343	1.21185	0.16161	0.0729657	0.73715	0.856793	0.55304	0.773949	0.484855	0.142479	0.84415	0.940342	1.16447	0.755997	-0.623225	-0.228849	0.7852	0.929815
Ammecr1l	NM_001107399	chr18:24540658-24563576	3.04576	2.44877	-0.314748	-0.454056	0.4957	0.770694	2.93745	1.32784	-1.14548	-1.31303	0.0634	0.230247	2.37529	2.84996	0.262836	0.312363	0.65225	0.85206	1.27702	2.78307	1.1239	1.11856	0.09445	0.509916
Amn	NM_001108061	chr6:135724454-135731895	0.907782	0.016311	-5.79843	-1.73591	0.1968	0.543357	0.876081	0.323382	-1.43783	-0.543776	0.2998	0.533316	0.0157839	0.013758	-0.198182	0	1	1	0.311831	0.0133965	-4.54083	0	1	1
Amn1	NM_001008333	chr4:183670590-183697531	15.0939	14.0247	-0.105994	-0.192264	0.78525	0.913288	14.5367	9.58181	-0.601326	-0.976935	0.17205	0.411453	13.6073	14.2389	0.0654645	0.101266	0.8834	0.955583	9.21717	13.9017	0.592862	0.844393	0.21405	0.661245
Amotl2	NM_031717	chr8:111210810-111226212	7.11549	4.24553	-0.745019	-1.29054	0.05845	0.28741	6.86568	4.79368	-0.518269	-0.947743	0.17985	0.422098	4.11415	6.76401	0.717285	1.07776	0.11545	0.455204	4.61029	6.6055	0.51881	0.82709	0.23935	0.678537
Ampd1	NM_138876	chr2:205569023-205589961	0	0.240863	inf	0	1	1	0	0	0	0	1	1	0.234232	0	#NAME?	0	1	1	0	0	0	0	1	1
Ampd2	NM_001101681	chr2:210861623-210873024	26.5874	12.117	-1.13371	-2.98746	0.00025	0.0074038	25.6747	12.1214	-1.08279	-2.8425	0.00045	0.00602209	11.7613	15.5599	0.403785	0.865743	0.24335	0.60813	11.6496	15.1939	0.383216	0.827296	0.2803	0.695847
Ampd3	NM_031544	chr1:175586096-175630467	8.90594	3.69486	-1.26925	-2.27905	0.00515	0.0665687	8.59431	3.09086	-1.47537	-2.36914	0.0019	0.018892	3.588	4.28704	0.256802	0.33598	0.6405	0.846046	2.97429	4.18126	0.491393	0.617081	0.34365	0.736057
Amph	NM_022217	chr17:48304323-48562838	6.97009	6.17455	-0.174842	-0.219833	0.74965	0.902017	6.72534	5.26919	-0.352027	-0.408212	0.55105	0.736934	5.99456	4.23286	-0.502022	-0.469787	0.5136	0.779659	5.06499	4.12797	-0.295128	-0.254471	0.71075	0.899557
Amt	NM_001014004	chr8:117068387-117078633	10.0468	7.11297	-0.498208	-0.781047	0.2476	0.59365	9.69172	4.94466	-0.970881	-1.37572	0.05485	0.211655	6.89736	9.21484	0.417915	0.564404	0.38735	0.710153	4.75143	8.99333	0.920492	1.13031	0.12575	0.551555
Amtn	NM_001044296	chr14:21286508-21299068	0	0	0	0	1	1	0	0	0	0	1	1	0	0	0	0	1	1	0	0	0	0	1	1
Amy1a	NM_001010970	chr2:216428708-216443518	0	0	0	0	1	1	0	0	0	0	1	1	0	0	0	0	1	1	0	0	0	0	1	1
Amy2a3	NM_031502	chr2:216373673-216382260	0.131001	0	#NAME?	0	1	1	0.126749	0	#NAME?	0	1	1	0	0	0	0	1	1	0	0	0	0	1	1
Amz1	NM_001047092	chr12:15976886-15996939	3.59538	3.54065	-0.0221315	-0.0184296	0.9777	0.991031	3.46897	1.03778	-1.741	-0.93362	0.13305	0.355376	3.4324	1.63643	-1.06866	-0.608974	0.3426	0.675724	1.00074	1.59476	0.672274	0.292488	0.32095	0.7222
Amz2	NM_001014121	chr10:97710904-97721442	29.1011	33.5565	0.205519	0.67229	0.3588	0.68126	28.0843	26.2044	-0.0999525	-0.303635	0.67425	0.818742	32.5721	23.6185	-0.463716	-1.30561	0.0705	0.363857	25.196	23.0648	-0.127505	-0.334776	0.64585	0.872143
Anapc1	NM_001107771	chr3:121147546-121226125	4.40033	3.2492	-0.437526	-0.973861	0.1537	0.479206	4.24365	2.56398	-0.726921	-1.4749	0.0401	0.171379	3.15026	4.7725	0.599273	1.18869	0.09275	0.415864	2.4677	4.66028	0.917249	1.67612	0.01725	0.252869
Anapc10	NM_001108445	chr19:31816135-31867928	3.9956	2.53774	-0.654869	-0.522703	0.4581	0.749038	3.85565	1.36266	-1.50055	-1.10786	0.1236	0.340612	2.46028	2.24581	-0.131589	-0.0680713	0.92755	0.974051	1.31368	2.19105	0.73801	0.430674	0.4943	0.807724
Anapc11	NM_001126082	chr10:109774877-109785877	44.1725	62.9186	0.51034	2.03304	0.0068	0.0798659	42.6336	71.3481	0.742886	2.9983	5e-05	0.000964063	61.076	51.4597	-0.247163	-0.912467	0.21605	0.581405	68.5848	50.2501	-0.448763	-1.6913	0.02325	0.291343
Anapc13	NM_001173983	chr8:111064041-111116014	190.534	255.742	0.424638	1.2805	0.0696	0.31631	183.82	261.156	0.506618	1.53446	0.02895	0.137457	248.111	215.698	-0.201971	-0.568859	0.42355	0.731052	251.031	210.579	-0.253506	-0.72586	0.3026	0.712496
Anapc15	NM_001170435	chr1:166981818-166985363	74.4032	88.6778	0.253209	0.595216	0.4031	0.713797	71.8431	77.9843	0.118336	0.256779	0.7143	0.84365	86.0299	70.9747	-0.277534	-0.565638	0.4153	0.726292	75.0369	69.2358	-0.116084	-0.21876	0.7495	0.915235
Anapc2	NM_001100532	chr3:2490537-2502247	78.8773	40.1003	-0.975995	-3.19685	5e-05	0.0023396	76.1426	36.0209	-1.07987	-3.41081	5e-05	0.000964063	38.9133	50.4195	0.373717	1.04699	0.1432	0.492522	34.6328	49.2213	0.507143	1.37504	0.055	0.412803
Anapc4	NM_001107220	chr14:60471962-60503803	21.884	17.6022	-0.314118	-0.862927	0.22755	0.577414	21.0991	9.06721	-1.21845	-2.71102	0.0006	0.00764543	17.0671	20.0683	0.233703	0.560917	0.42685	0.732304	8.71745	19.5902	1.16815	2.28614	0.00265	0.0883282
Anapc5	NM_001080147	chr12:39209159-39242691	140.052	115.342	-0.280048	-1.09561	0.11535	0.418797	135.205	89.6004	-0.593573	-2.3063	0.001	0.0114482	111.9	103.162	-0.117296	-0.417352	0.55885	0.803089	86.1408	100.749	0.225992	0.793943	0.26655	0.688305
Anapc7	NM_001107142	chr12:39614732-39641999	20.047	13.3383	-0.58781	-1.31741	0.06415	0.304063	19.3473	14.2279	-0.443402	-0.97664	0.1717	0.410867	12.9395	24.2684	0.907296	1.86825	0.00975	0.116749	13.6775	23.7059	0.793441	1.65155	0.028	0.320642
Andpro	NM_012718	chr3:143893005-143899370	0	0	0	0	1	1	0	0	0	0	1	1	0	0	0	0	1	1	0	0	0	0	1	1
Ang	NM_001006992	chr15:28018039-28035391	0.365305	1.34624	1.88176	0.336663	0.6145	0.833924	0.353146	0	#NAME?	0	1	1	1.30255	0	#NAME?	#NAME?	0.23795	0.604358	0	0	0	0	1	1
Ang2	NM_001012359	chr15:28103702-28104206	0	0	0	0	1	1	0	0	0	0	1	1	0	0	0	0	1	1	0	0	0	0	1	1
Ang2	NM_001012359_1	chrUn_KL568405v1:92227-92731	0	0	0	0	1	1	0	0	0	0	1	1	0	0	0	0	1	1	0	0	0	0	1	1
Angel1	NM_001108717	chr6:110644327-110669910	1.26745	0.736279	-0.78361	-0.672112	0.3694	0.690404	1.22299	0.293338	-2.05977	-1.4003	0.0605	0.224018	0.715774	1.28039	0.839007	0.591313	0.47245	0.759436	0.281999	1.24961	2.14772	1.30184	0.05435	0.411935
Angel2	NM_001135119	chr13:109505696-109520431	5.80464	5.28873	-0.134286	-0.25366	0.7111	0.882313	5.59756	2.74306	-1.02901	-1.56553	0.0349	0.155682	5.12881	5.01389	-0.0326937	-0.0518648	0.9446	0.981109	2.63901	4.88875	0.889467	1.13836	0.1169	0.546731
Angpt1	NM_053546	chr7:81342373-81592299	1.14486	1.39781	0.288001	0.156992	0.8388	0.937416	1.10267	0.584696	-0.915242	-0.464929	0.55435	0.739154	1.35444	0.44513	-1.60539	-0.723188	0.44225	0.741338	0.563813	0.433453	-0.379342	0	1	1
Angpt2	NM_134454	chr16:75966479-76016147	0.860254	0.790875	-0.121314	-0.0659868	0.91515	0.969782	0.832587	0.0128297	-6.02004	-1.76284	0.1555	0.390767	0.76516	0.947778	0.308789	0.150167	0.2738	0.626757	0.0123715	0.927149	6.2277	1.85761	0.329	0.727574
Angpt4	NM_001106526	chr3:147422094-147455670	0.425062	0.500193	0.234811	0	1	1	0.411019	0.239577	-0.778717	0	1	1	0.486538	0.0308891	-3.97738	0	1	1	0.231024	0.0302148	-2.93472	0	1	1
Angptl1	NM_001109383	chr13:74446000-74564184	1.21293	0.0781383	-3.95632	-0.62784	0.40095	0.712489	1.1674	0.479234	-1.2845	-0.410327	0.6729	0.81813	0.075594	0	#NAME?	0	1	1	0.459502	0	#NAME?	0	1	1
Angptl2	NM_133569	chr3:12262821-12292666	0.751334	0.0904813	-3.05376	-1.16298	0.36125	0.68325	0.72662	0.315479	-1.20366	-0.479526	0.5367	0.7271	0.0880079	0.0460846	-0.933348	0	1	1	0.303995	0.0449577	-2.75741	0	1	1
Angptl3	NM_001025065	chr5:117596135-117754571	0	0	0	0	1	1	0	0	0	0	1	1	0	0	0	0	1	1	0	0	0	0	1	1
Angptl4	NM_199115	chr7:18627813-18634043	1.8698	1.76324	-0.0846537	-0.06008	0.9251	0.974237	1.80393	0.560424	-1.68656	-0.825195	0.2225	0.469891	1.71197	1.28425	-0.414731	-0.208432	0.74875	0.897776	0.538712	1.25074	1.2152	0.561824	0.2429	0.678537
Angptl6	NM_001106702	chr8:21890237-21901829	1.3019	1.50588	0.209996	0.0956114	0.8798	0.954368	1.25691	3.45344	1.45815	0.747011	0.5471	0.733912	1.46317	5.00975	1.77564	0.85286	0.55865	0.803071	3.31338	4.90029	0.564565	0.315215	0.8222	0.943002
Ank1	NM_001107322	chr16:73681421-73827488	2.44701	2.28863	-0.0965342	-0.120601	0.8689	0.949943	2.36244	0.695208	-1.76476	-1.48712	0.12245	0.339598	2.22206	1.97927	-0.166933	-0.172515	0.8098	0.92501	0.667103	1.93123	1.53354	1.29399	0.12085	0.551555
Ank3	NM_001033984	chr20:19948766-20480625	2.41844	1.09285	-1.14598	-1.11591	0.12415	0.432038	2.33617	0.905584	-1.36723	-1.13253	0.153	0.386889	1.06012	1.11933	0.078407	0.0588314	0.93795	0.978822	0.869778	1.09286	0.329395	0.235355	0.75985	0.920234
Ank3	NM_031805	chr20:19948766-20480625	23.6322	10.9076	-1.11543	-3.54668	5e-05	0.0023396	22.8101	12.094	-0.91538	-2.91731	5e-05	0.000964063	10.5851	17.267	0.705982	1.97961	0.0065	0.0904648	11.6307	16.8558	0.535312	1.50628	0.03295	0.340876
Ankef1	NM_001106516	chr3:129501104-129536422	0.0203562	0	#NAME?	0	1	1	0.0195862	0	#NAME?	0	1	1	0	0	0	0	1	1	0	0	0	0	1	1
Ankfy1	NM_001107018	chr10:59259954-59331668	5.96802	4.22288	-0.499028	-1.16482	0.09765	0.386176	5.75588	2.74208	-1.06977	-2.14788	0.00455	0.0367606	4.09817	8.23392	1.0066	2.17202	0.00365	0.060641	2.63709	8.03716	1.60774	2.97532	0.0002	0.0111749
Ankh	NM_053714	chr2:80131565-80256948	11.6994	10.4994	-0.156124	-0.316414	0.6564	0.854919	11.2921	8.12319	-0.475191	-0.896229	0.2217	0.469047	10.1887	9.0031	-0.178477	-0.305115	0.66995	0.860911	7.8089	8.79574	0.171685	0.276754	0.7119	0.899641
Ankhd1	NM_001204053	chr18:29386905-29485611	2.3114	2.62454	0.183299	0.327339	0.63165	0.842656	2.22968	3.35769	0.590635	1.05534	0.1294	0.349368	2.54509	3.95715	0.636744	1.09229	0.1243	0.46708	3.22958	3.85848	0.256688	0.458933	0.5222	0.81751
Ankib1	NM_001134781	chr4:27473476-27597206	8.06857	3.89918	-1.04914	-2.48116	0.0023	0.0392207	7.78468	5.33765	-0.544433	-1.36489	0.06	0.223056	3.78263	6.18065	0.708368	1.4281	0.04325	0.281017	5.13495	6.0332	0.232573	0.501483	0.48285	0.802737
Ankle2	NM_001047901	chr12:52475861-52507126	1.96727	2.02892	0.0445174	0.0404264	0.95415	0.982539	1.89929	1.16455	-0.705692	-0.571278	0.42825	0.645858	1.9674	2.63414	0.421046	0.379868	0.54735	0.798098	1.11995	2.56807	1.19725	0.728875	0.29035	0.70376
Ankmy2	NM_001108019	chr6:55648020-55688946	25.9311	37.6904	0.539512	1.49428	0.0367	0.220275	25.0422	26.0508	0.0569637	0.144339	0.83955	0.913639	36.5706	18.7742	-0.961931	-2.18233	0.00355	0.0598319	25.0417	18.3124	-0.451511	-0.955238	0.1688	0.619005
Ankra2	NM_207595	chr2:28370635-28381268	0.0922912	0.12102	0.390986	0	1	1	0.0889311	0.194063	1.12576	0	1	1	0.117472	0.129085	0.136004	0	1	1	0.18666	0.12607	-0.566186	0	1	1
Ankra2	NM_207595_1	chrX:82407596-82418229	0	0.0407273	inf	0	1	1	0	0.0431251	inf	0	1	1	0.0394657	0.0222046	-0.829744	0	1	1	0.04148	0.0216686	-0.936812	0	1	1
Ankrd1	NM_013220	chr1:254726993-254735545	0.0183288	0.248638	3.76187	0	1	1	0.0177295	0.0301457	0.7658	0	1	1	0.240641	0.111093	-1.11511	0	1	1	0.0290696	0.108525	1.90045	0	1	1
Ankrd10	NM_001271219	chr16:83205897-83229147	11.2376	7.9371	-0.501648	-0.939469	0.18835	0.530409	10.8333	4.30895	-1.33007	-1.96337	0.0038	0.0320024	7.70515	4.60246	-0.743419	-0.952028	0.18515	0.547933	4.15148	4.49672	0.115245	0.130172	0.8412	0.948205
Ankrd12	NM_001108238	chr9:113605682-113682482	18.4515	20.5977	0.158747	0.614105	0.3812	0.697634	17.784	27.1733	0.611607	2.5001	0.00065	0.00816715	19.9745	23.3272	0.223854	0.825449	0.2431	0.607906	26.144	22.7599	-0.199989	-0.792996	0.2788	0.695555
Ankrd13a	NM_001012148	chr12:47558586-47588335	20.1341	16.884	-0.253985	-0.721706	0.3176	0.648607	19.4429	11.5956	-0.745668	-1.89458	0.00815	0.0557424	16.3881	14.3785	-0.188739	-0.446111	0.5313	0.787764	11.1497	14.0344	0.331957	0.711706	0.3056	0.713469
Ankrd13c	NM_001191570	chr2:264786241-264833283	5.29678	6.16728	0.219521	0.431026	0.5396	0.795782	5.10805	5.97272	0.225615	0.43299	0.5458	0.732922	5.9792	4.64972	-0.362808	-0.619385	0.3757	0.701404	5.74846	4.53673	-0.341521	-0.578884	0.41155	0.768608
Ankrd13d	NM_001108514	chr1:219520451-219532673	91.836	46.5477	-0.98035	-3.27665	5e-05	0.0023396	88.6883	67.9898	-0.383426	-1.38811	0.066	0.236178	45.1738	77.641	0.781334	2.34474	0.00165	0.0343029	65.3302	75.8463	0.215329	0.711529	0.3691	0.748424
Ankrd16	NM_001033698	chr17:70384882-70398089	4.60169	3.58544	-0.360014	-0.288986	0.6789	0.864527	4.4434	3.41168	-0.381182	-0.28598	0.6955	0.832544	3.48087	9.80698	1.49436	0.970984	0.18045	0.54256	3.28079	9.58128	1.54618	0.97242	0.1648	0.613478
Ankrd17	NM_001105999	chr14:19318564-19431517	12.2538	13.7413	0.165285	0.592893	0.3999	0.711774	11.8205	13.8234	0.225815	0.801339	0.25495	0.496475	13.3284	13.7577	0.0457307	0.15192	0.8303	0.933883	13.2938	13.4249	0.014166	0.0470883	0.94875	0.986322
Ankrd2	NM_001107589	chr1:261281858-261291307	0	0	0	0	1	1	0	0	0	0	1	1	0	0	0	0	1	1	0	0	0	0	1	1
Ankrd22	NM_001191638	chr1:252430749-252461346	0	0	0	0	1	1	0	0	0	0	1	1	0	0	0	0	1	1	0	0	0	0	1	1
Ankrd23	NM_001108211	chr9:43110985-43117585	0.301904	0.133525	-1.17698	0	1	1	0.290941	0	#NAME?	0	1	1	0.129196	0	#NAME?	0	1	1	0	0	0	0	1	1
Ankrd24	NM_001106771	chr7:10917360-10936415	3.69804	4.50001	0.283166	0.369222	0.6004	0.825903	3.57158	3.36413	-0.0863276	-0.0996426	0.8868	0.937808	4.37098	3.61314	-0.274705	-0.29987	0.6821	0.867449	3.23534	3.52586	0.124058	0.125897	0.85905	0.955179
Ankrd27	NM_001271264	chr1:91857069-91958762	0.973914	1.36687	0.489005	0.393135	0.5962	0.824737	0.940271	0.275541	-1.77081	-1.03584	0.11265	0.32527	1.32805	0.884093	-0.587038	-0.424662	0.5325	0.788685	0.265208	0.862457	1.70133	0.793399	0.17985	0.635107
Ankrd29	NM_001190372	chr18:3673914-3676187	4.0495	5.16245	0.350311	0.480005	0.4732	0.756112	3.91221	1.84715	-1.08268	-1.11367	0.1124	0.324788	5.00702	1.79605	-1.47912	-1.24864	0.08855	0.406438	1.77851	1.75623	-0.0181835	-0.0136717	0.98465	0.994617
Ankrd32	NM_001106400	chr2:4095130-4195819	5.19656	2.94558	-0.819007	-1.30659	0.06895	0.315298	5.01066	4.81812	-0.0565296	-0.103041	0.88705	0.937851	2.8555	3.32493	0.21958	0.29466	0.6851	0.868298	4.63731	3.24084	-0.516921	-0.781914	0.31485	0.719079
Ankrd33b	NM_001191565	chr2:84361060-84436912	22.7347	21.6232	-0.0723181	-0.150425	0.84525	0.940006	21.9581	31.6855	0.529069	1.15641	0.132	0.353377	21.0036	29.9068	0.509835	0.998621	0.2027	0.56599	30.4546	29.1997	-0.0607085	-0.129587	0.8636	0.956311
Ankrd34a	NM_001024980	chr2:198721723-198725155	19.9202	26.6033	0.41737	1.24436	0.1076	0.405641	19.2337	19.3223	0.00663132	0.018872	0.9792	0.986521	25.8268	26.6968	0.0478003	0.138263	0.858	0.945396	18.5692	26.0759	0.489801	1.36464	0.0961	0.511266
Ankrd34b	NM_001109174	chr2:22000105-22016030	3.82409	7.26386	0.92562	1.47249	0.0417	0.237375	3.68854	1.33528	-1.46591	-1.52178	0.0375	0.164096	7.04325	3.61751	-0.961246	-1.3385	0.06525	0.349729	1.28347	3.53056	1.45985	1.28588	0.08475	0.491831
Ankrd34c	NM_001106845	chr8:97105070-97115027	0.376237	0.0438556	-3.10081	0	1	1	0.363938	0.38259	0.0721042	0	1	1	0.042543	0.237347	2.48	0	1	1	0.368643	0.231493	-0.671255	0	1	1
Ankrd37	NM_001108400	chr16:49463015-49465905	22.2398	27.2235	0.291709	0.42999	0.53885	0.79539	21.4534	16.9101	-0.343318	-0.438256	0.53235	0.724372	26.4276	16.3267	-0.694812	-0.801707	0.25925	0.6163	16.2399	15.9496	-0.026023	-0.0272185	0.9682	0.991225
Ankrd39	NM_001135014	chr9:43119535-43127916	3.09386	8.69152	1.4902	1.37095	0.0595	0.291105	2.98956	7.61313	1.34856	0.962872	0.20935	0.457619	8.444	1.03491	-3.02842	-1.71303	0.27215	0.625361	7.32052	1.01235	-2.85424	-1.54945	0.26835	0.689413
Ankrd40	NM_001134699	chr10:82032655-82045937	8.42847	8.07678	-0.0614914	-0.131616	0.85355	0.942826	8.13266	9.00274	0.146636	0.31171	0.66455	0.812674	7.83431	13.5965	0.795358	1.62446	0.02535	0.206176	8.65634	13.2759	0.616986	1.27932	0.07445	0.470145
Ankrd42	NM_001135013	chr1:157419117-157461588	8.64639	7.18114	-0.267886	-0.452491	0.50985	0.777579	8.34724	9.30094	0.156077	0.269154	0.70075	0.836803	6.96335	8.54336	0.295022	0.435768	0.52415	0.783839	8.93978	8.3406	-0.100089	-0.15396	0.8255	0.943452
Ankrd44	NM_001191807	chr9:61229251-61529480	3.29903	1.49356	-1.14329	-1.76692	0.0177	0.143988	3.18248	0.667126	-2.25412	-2.57389	0.0041	0.0340158	1.44953	1.51565	0.0643504	0.0751125	0.9152	0.967898	0.641695	1.47984	1.20548	1.05211	0.14425	0.585813
Ankrd46	NM_001013948	chr7:75279447-75300406	38.2036	44.7542	0.228313	0.755414	0.28925	0.626369	36.841	45.235	0.296129	0.954008	0.1736	0.413557	43.4295	32.4385	-0.420969	-1.22935	0.0786	0.38485	43.4761	31.6504	-0.457999	-1.3109	0.0617	0.431713
Ankrd49	NM_001126283	chr8:13299558-13304244	12.2433	9.10566	-0.427159	-0.835313	0.24215	0.589758	11.8053	8.58526	-0.459498	-0.854595	0.22455	0.47127	8.83433	8.14221	-0.117701	-0.186677	0.7907	0.917879	8.25596	7.93817	-0.0566293	-0.0867009	0.89895	0.970233
Ankrd50	NM_001191606	chr2:125291365-125321900	1.76773	0.68172	-1.37465	-1.10427	0.1017	0.395508	1.70685	1.46159	-0.223798	-0.244185	0.7634	0.871887	0.659957	4.29022	2.70061	1.56642	0.04855	0.297864	1.40206	4.19218	1.58015	1.72425	0.0624	0.433725
Ankrd52	NM_001191875	chr7:2795887-2809538	3.69009	2.5142	-0.553555	-0.62383	0.3637	0.685888	3.56272	1.76667	-1.01195	-1.05729	0.16425	0.401816	2.43616	3.11485	0.35455	0.349788	0.60045	0.82442	1.69784	3.04256	0.841586	0.736458	0.35665	0.742815
Ankrd54	NM_001025285	chr7:120284641-120295573	14.5907	17.5447	0.265985	0.564835	0.45995	0.749108	14.0908	12.8376	-0.13438	-0.282134	0.74665	0.861514	17.0312	6.64112	-1.35868	-2.06436	0.0341	0.245196	12.3221	6.49261	-0.924372	-1.43658	0.13795	0.574552
Ankrd55	NM_001270039	chr2:44126817-44196467	0.330362	1.50478	2.18743	1.34699	0.046	0.251923	0.318838	0.910109	1.51321	0.780373	0.27075	0.507759	1.45866	0.26341	-2.46926	-1.29617	0.2945	0.638884	0.873789	0.257608	-1.7621	-0.865127	0.40255	0.764389
Ankrd6	NM_001134969	chr5:48052618-48165317	12.1943	11.8814	-0.0375014	-0.0984055	0.88785	0.958483	11.7652	9.67826	-0.281706	-0.689877	0.33	0.561642	11.5255	7.50059	-0.619753	-1.30726	0.06785	0.357041	9.30487	7.31836	-0.346466	-0.69327	0.31425	0.718532
Ankrd61	NM_001044297	chr12:12749025-12782078	0	0.389639	inf	0	1	1	0	0.100774	inf	0	1	1	0.378967	0	#NAME?	0	1	1	0.096643	0	#NAME?	0	1	1
Ankrd65	NM_001109427	chr5:173237641-173239899	0	0	0	0	1	1	0	0	0	0	1	1	0	0	0	0	1	1	0	0	0	0	1	1
Ankrd7	NM_001192012	chr4:45567720-45586054	0	0	0	0	1	1	0	0	0	0	1	1	0	0	0	0	1	1	0	0	0	0	1	1
Ankrd9	NM_001012112	chr6:135410028-135412312	18.0426	15.3105	-0.236883	-0.428594	0.55625	0.805423	17.4199	21.2429	0.286248	0.604215	0.4938	0.695019	14.857	24.8131	0.739961	1.24938	0.0904	0.411207	20.4069	24.2343	0.247994	0.521639	0.5722	0.842187
Anks1a	NM_001107613	chr20:7484549-7636497	12.952	8.64354	-0.583478	-1.60579	0.0408	0.234075	12.5051	8.22116	-0.6051	-1.63889	0.04215	0.177424	8.39569	12.7823	0.606432	1.48629	0.0616	0.339047	7.89895	12.4835	0.660287	1.61986	0.051	0.401956
Anks1b	NM_001271371	chr7:30507134-31682990	29.1913	21.1845	-0.462531	-1.66088	0.01935	0.151106	28.1572	21.9232	-0.361047	-1.31274	0.06205	0.227458	20.5478	20.0084	-0.038383	-0.120794	0.8607	0.946478	21.0786	19.5352	-0.109705	-0.349363	0.61035	0.858797
Anks3	NM_001009676	chr10:10808822-10829492	26.8128	19.6766	-0.446438	-1.08648	0.13895	0.457226	25.8907	18.6908	-0.470105	-1.1209	0.1337	0.356381	19.1101	23.8674	0.320703	0.687615	0.34535	0.67727	17.9497	23.3098	0.376981	0.794502	0.30275	0.712496
Anks4b	NM_001127650	chr1:189457581-190370515	0.254906	0.433165	0.764954	0	1	1	0.245328	0	#NAME?	0	1	1	0.421216	0	#NAME?	0	1	1	0	0	0	0	1	1
Anks6	NM_001015028	chr5:62642973-62684387	2.09973	2.2273	0.0850963	0.102644	0.9019	0.964481	2.02884	1.23365	-0.717722	-0.856642	0.38385	0.608749	2.1632	1.13592	-0.929306	-0.787171	0.25965	0.616385	1.18403	1.10833	-0.0953208	-0.0721901	0.9339	0.98228
Ankzf1	NM_001014219	chr9:82393671-82400535	8.01543	6.23743	-0.361829	-0.576138	0.4094	0.717692	7.73953	9.60758	0.311926	0.541082	0.45545	0.667655	6.04815	9.72801	0.685652	0.971849	0.1639	0.524595	9.22529	9.49701	0.0418798	0.0664479	0.93065	0.981719
Ano1	NM_001107564	chr1:217754348-217902473	0	0.458131	inf	0	1	1	0	0.0234781	inf	0	1	1	0.443525	0.0312741	-3.82598	0	1	1	0.0226399	0.0305931	0.434337	0	1	1
Ano4	NM_001106778	chr7:29492065-30162056	6.87365	5.19298	-0.404513	-0.737226	0.28595	0.624425	6.62756	7.19166	0.117846	0.22308	0.75215	0.864801	5.0354	3.51529	-0.518464	-0.707749	0.301	0.644484	6.91961	3.43309	-1.01118	-1.41267	0.04975	0.398759
Ano6	NM_001108108	chr7:137142169-137335208	1.08689	1.59853	0.556536	0.617687	0.3689	0.690242	1.04869	0.538862	-0.960605	-0.724792	0.29015	0.523216	1.55203	1.35773	-0.192963	-0.198621	0.77455	0.909268	0.519089	1.32561	1.3526	0.781608	0.2338	0.678537
Ano7	NM_001004071	chr9:100511609-100551798	0	0	0	0	1	1	0	0	0	0	1	1	0	0	0	0	1	1	0	0	0	0	1	1
Anp32a	NM_012903	chr8:67295729-67333224	53.3854	62.9256	0.237203	0.535924	0.44805	0.742402	51.4964	89.8973	0.803806	1.83978	0.0117	0.0735832	61.0457	74.3869	0.285158	0.614669	0.37765	0.703112	86.481	72.5666	-0.253078	-0.574349	0.4201	0.772354
Anp32b	NM_131911	chr5:62071345-62094633	134.517	175.754	0.385769	1.38652	0.0495	0.261423	129.763	176.621	0.44478	1.60615	0.0238	0.120055	170.51	154.528	-0.141984	-0.481232	0.4903	0.768391	169.788	150.896	-0.170175	-0.584679	0.4121	0.769262
Anp32e	NM_001013200	chr2:198040572-198055241	36.8719	49.317	0.419563	1.03907	0.1416	0.461789	35.5558	84.1507	1.24289	3.21295	5e-05	0.000964063	47.8509	66.8837	0.483108	1.18448	0.09125	0.4125	80.949	65.2667	-0.310666	-0.839336	0.24055	0.678537
Anpep	NM_031012	chr1:141561363-141579820	0.0309054	0.429859	3.79793	0	1	1	0.0298967	0.124579	2.059	0	1	1	0.417998	0.0284626	-3.87635	0	1	1	0.119487	0.0278427	-2.10149	0	1	1
Antxr1	NM_001044249	chr4:118946266-119131202	0.852503	0.444759	-0.938681	-0.634469	0.3754	0.693622	0.82316	0.632594	-0.379894	-0.179762	0.79715	0.891688	0.432326	0.60962	0.495789	0	1	1	0.609036	0.595642	-0.032083	-0.0174773	0.9776	0.993294
Anxa1	NM_012904	chr1:237893982-237910002	6.62224	3.30783	-1.00143	-0.914736	0.20465	0.552121	6.38474	4.27112	-0.580014	-0.549671	0.4202	0.640052	3.20061	4.0702	0.346752	0.212462	0.7688	0.906258	4.10962	3.972	-0.0491394	-0.0373283	0.96015	0.988313
Anxa10	NM_001109110	chr16:29674698-29741521	0	0	0	0	1	1	0	0	0	0	1	1	0	0	0	0	1	1	0	0	0	0	1	1
Anxa11	NM_001011918	chr16:3293656-4283592	33.3326	33.1939	-0.00601592	-0.0126384	0.98485	0.993256	32.1832	61.875	0.943049	2.28904	0.00225	0.021375	32.229	52.6607	0.708367	1.43795	0.05715	0.327699	59.4656	51.4013	-0.210251	-0.511274	0.48765	0.80467
Anxa13	NM_001134910	chr7:98217641-98270110	0	0	0	0	1	1	0	0	0	0	1	1	0	0	0	0	1	1	0	0	0	0	1	1
Anxa2	NM_019905	chr8:75687133-75723589	18.128	12.1827	-0.573387	-0.847592	0.20645	0.554081	17.498	13.429	-0.381841	-0.539724	0.44765	0.661496	11.8226	15.4833	0.389161	0.461635	0.51085	0.779033	12.9016	15.0903	0.226072	0.265487	0.6855	0.889124
Anxa3	NM_012823	chr14:14371920-14426437	25.5362	22.8649	-0.159408	-0.495243	0.47195	0.755352	24.6363	19.5671	-0.332351	-0.97724	0.1604	0.397205	22.1761	19.768	-0.165839	-0.44079	0.5327	0.788685	18.8164	19.2798	0.0350928	0.0889122	0.8978	0.9699
Anxa4	NM_024155	chr4:118538774-118595580	12.5713	10.5529	-0.252497	-0.443404	0.53945	0.795782	12.1199	28.5303	1.23512	2.47809	0.0017	0.0174358	10.2274	9.90524	-0.0461824	-0.066764	0.92285	0.97225	27.4484	9.67187	-1.50486	-2.49046	0.0014	0.0545199
Anxa5	NM_013132	chr2:123162495-123193040	38.75	55.0185	0.505719	1.31489	0.06685	0.310568	37.4155	44.7452	0.258096	0.624801	0.37885	0.603924	53.3743	67.8712	0.346653	0.899262	0.19395	0.557977	43.022	66.2527	0.622905	1.52068	0.0318	0.337342
Anxa6	NM_024156	chr10:40320580-40375605	33.5145	25.8048	-0.377144	-0.993937	0.15625	0.483676	32.3655	21.4601	-0.592803	-1.45642	0.038	0.165665	25.0336	28.9146	0.207934	0.481982	0.4949	0.770555	20.6358	28.2356	0.452367	0.976278	0.17035	0.620166
Anxa7	NM_130416	chr15:4254498-4281289	39.7882	34.5402	-0.204063	-0.552222	0.44015	0.737956	38.4182	32.4182	-0.244986	-0.641435	0.37605	0.601748	33.5208	34.9892	0.0618509	0.145348	0.839	0.93824	31.1491	34.1523	0.132792	0.304172	0.67475	0.884289
Anxa8	NM_001031654	chr16:10417274-10432383	1.35189	0.149723	-3.17461	-1.31798	0.28165	0.621767	1.30429	0.0900807	-3.85591	-1.40518	0.2221	0.469554	0.145036	0.0342996	-2.08014	0	1	1	0.0863789	0.033401	-1.37079	0	1	1
Aoah	NM_001191940	chr17:45872413-46115026	0	0.0374758	inf	0	1	1	0	0.208726	inf	0	1	1	0.0362561	0	#NAME?	0	1	1	0.200147	0	#NAME?	0	1	1
Aoc1	NM_022935	chr4:78496042-78515578	0	0	0	0	1	1	0	0	0	0	1	1	0	0	0	0	1	1	0	0	0	0	1	1
Aoc2-ps1	NR_033180	chr10:89245589-89247056	0.0911464	0.033312	-1.45214	0	1	1	0.0880886	0.450991	2.35607	0	1	1	0.0322306	0	#NAME?	0	1	1	0.434218	0	#NAME?	0	1	1
Aoc3	NM_031582	chr10:89251369-89259312	0.271769	0.238752	-0.186867	0	1	1	0.262476	0.051841	-2.34002	0	1	1	0.230995	0.0237588	-3.28133	0	1	1	0.0499909	0.0232194	-1.10633	0	1	1
Aox1	NM_019363	chr9:64929720-65007870	0.802508	0.358704	-1.16172	-0.742613	0.2837	0.623542	0.775327	0.14095	-2.45962	-1.08323	0.29195	0.525331	0.348504	0.0668666	-2.38182	0	1	1	0.135919	0.0651144	-1.0617	0	1	1
Aox2	NM_001008522	chr9:65177510-65265138	0	0	0	0	1	1	0	0.00729483	inf	0	1	1	0	0	0	0	1	1	0.00699544	0	#NAME?	0	1	1
Aox3	NM_001008527	chr9:65013861-65099433	0.0400725	0.0492272	0.296843	0	1	1	0.0385634	0.311266	3.01284	0	1	1	0.0476533	0.116465	1.28925	0	1	1	0.299355	0.11381	-1.39524	0	1	1
Aox4	NM_001008523	chr9:65110329-65167184	0	0	0	0	1	1	0	0.182077	inf	0	1	1	0	0.400888	inf	0	1	1	0.174983	0.391781	1.16283	0	1	1
Ap1ar	NM_001191850	chr2:232146417-232178533	33.388	32.4095	-0.0429122	-0.132945	0.85165	0.942179	32.1986	25.8947	-0.314339	-0.928308	0.1893	0.433769	31.4572	32.2001	0.0336731	0.0932574	0.8984	0.96002	24.9254	31.4277	0.334423	0.894653	0.20185	0.655051
Ap1b1	NM_001308298	chr14:85230651-85281806	18.6106	11.9706	-0.636633	-1.25774	0.0814	0.34816	17.9724	16.1094	-0.15788	-0.424072	0.554	0.73894	11.6066	26.3157	1.18097	2.25981	0.00675	0.092727	15.4871	25.7016	0.73079	1.94916	0.0088	0.180846
Ap1b1	NM_017277	chr14:85230651-85281806	5.9812	4.17462	-0.51879	-0.41944	0.49355	0.768426	5.76588	0.0132699	-8.76324	-1.10828	0.238	0.483231	4.05892	0.00127098	-11.6409	-0.276142	0.23635	0.602745	0.0129788	0.00119894	-3.43633	0	1	1
Ap1g1	NM_134460	chr19:41805251-41860072	5.29542	4.73485	-0.161428	-0.271591	0.70265	0.878444	5.10915	2.36556	-1.1109	-1.41974	0.04955	0.197576	4.59068	3.86057	-0.249896	-0.341686	0.62475	0.837466	2.27277	3.76697	0.728953	0.800864	0.254	0.680036
Ap1m1	NM_001044239	chr16:19288353-19303818	63.5504	39.3049	-0.69319	-2.17292	0.0047	0.0621952	61.387	35.8894	-0.774374	-2.41723	0.00255	0.0235754	38.1499	38.392	0.0091252	0.0235698	0.97495	0.991614	34.4803	37.4881	0.120663	0.310285	0.69125	0.891796
Ap1m2	NM_001108996	chr8:22318940-22336827	0.77928	0.827332	0.0863249	0.043424	0.6065	0.829132	0.753193	0.499538	-0.592424	-0.252832	0.42365	0.643072	0.800515	0	#NAME?	#NAME?	0.0603	0.336208	0.481724	0	#NAME?	#NAME?	0.126	0.551596
Ap1s1	NM_001108331	chr12:22665157-22676079	245.154	289.791	0.241325	1.05794	0.1674	0.502522	236.683	168.905	-0.486747	-2.05914	0.0068	0.0491773	281.355	178.467	-0.656735	-2.5665	0.00075	0.0184541	162.397	174.255	0.101674	0.379699	0.60925	0.858398
Ap1s2	NM_001127531	chrX:32329882-32355307	48.3819	54.0592	0.160072	0.541675	0.45105	0.744516	46.634	12.3913	-1.91205	-5.0426	5e-05	0.000964063	52.3976	15.2771	-1.77813	-4.45393	5e-05	0.0020606	11.935	14.8923	0.319361	0.654285	0.4291	0.777286
Ap1s3	NM_001172150	chr9:85387064-85445939	0.141766	0.377107	1.41146	0	1	1	0.136251	0.00927945	-3.87608	0	1	1	0.364826	0.931154	1.35181	0.772875	0.34835	0.679061	0.00894851	0.909597	6.66744	1.89699	0.14825	0.591032
Ap2a1	NM_001107511	chr1:100896946-100926335	30.5137	18.8629	-0.693908	-1.96215	0.0082	0.0896482	29.4615	18.2949	-0.687385	-1.99242	0.01255	0.0775969	18.3033	24.7381	0.434629	1.05591	0.1446	0.493842	17.5757	24.1503	0.458453	1.15282	0.1478	0.591032
Ap2a2	NM_031008	chr1:214534283-214606171	34.9294	22.4857	-0.635431	-1.92809	0.0074	0.0841256	33.72	21.0106	-0.682492	-2.01719	0.00805	0.0553491	21.8203	23.2921	0.0941747	0.239715	0.73275	0.890733	20.1868	22.7334	0.171405	0.427523	0.5606	0.835877
Ap2b1	NM_080583	chr10:70520205-70621971	16.7954	14.5944	-0.202658	-0.627552	0.37685	0.694235	16.2095	14.4818	-0.162599	-0.493534	0.4838	0.689878	14.154	18.2713	0.368374	1.03968	0.136	0.482999	13.9174	17.8434	0.358499	1.00369	0.1591	0.605911
Ap2m1	NM_053837	chr11:84041183-84047542	1124.93	727.542	-0.628734	-2.81211	0.00015	0.00511574	1086.47	568.153	-0.935298	-4.74462	5e-05	0.000964063	706.023	986.643	0.482813	2.05531	0.00515	0.0776026	546.045	963.299	0.818963	3.88852	5e-05	0.00359193
Ap2s1	NM_022952	chr1:78671237-78682847	759.052	988.635	0.38124	1.65837	0.02505	0.176847	733.042	931.796	0.346117	1.59784	0.03075	0.142539	959.708	891.847	-0.105799	-0.437771	0.5503	0.799118	895.552	870.83	-0.0403868	-0.177727	0.80825	0.937457
Ap3b1	NM_001107646	chr2:24024833-24225514	4.8021	5.23035	0.123245	0.199898	0.76335	0.905889	4.63036	3.39636	-0.447135	-0.633255	0.35015	0.580431	5.06819	3.30123	-0.618467	-0.807944	0.2244	0.590652	3.2682	3.22295	-0.0201149	-0.0232885	0.9742	0.992441
Ap3d1	NM_001100719	chr7:11838638-11873992	132.028	76.9726	-0.778431	-3.3198	5e-05	0.0023396	127.526	71.0041	-0.844815	-3.83067	5e-05	0.000964063	74.7178	115.842	0.63264	2.55074	0.0007	0.017595	68.2299	113.129	0.729499	3.1091	5e-05	0.00359193
Ap3m1	NM_133593	chr15:3436360-3454281	11.4106	4.10415	-1.47522	-2.74239	0.0008	0.0181364	11.0101	8.38281	-0.393318	-0.860723	0.2228	0.470017	3.98249	10.4054	1.38559	2.21284	0.0066	0.0914202	8.0621	10.1569	0.333225	0.641611	0.35635	0.742621
Ap3m2	NM_133305	chr16:74075841-74091230	30.4938	16.9897	-0.843857	-1.69448	0.0163	0.138373	29.4312	10.0585	-1.54893	-2.59489	0.0017	0.0174358	16.4773	18.7676	0.18776	0.30231	0.6722	0.862377	9.66829	18.3232	0.922342	1.2817	0.0633	0.43726
Ap3s1	NM_001106933	chr18:40732479-40797761	30.9225	36.3565	0.233553	0.59583	0.4	0.711774	29.8114	33.1027	0.151085	0.37757	0.60255	0.771509	35.2377	25.2753	-0.47939	-1.0591	0.13205	0.477995	31.8586	24.6607	-0.369468	-0.803385	0.2727	0.692033
Ap3s2	NM_001115039	chr1:141612960-141655417	117.992	135.714	0.201887	0.694106	0.3305	0.658187	113.873	124.997	0.134459	0.449071	0.5329	0.724479	131.725	131.283	-0.00485409	-0.0153807	0.98205	0.994154	120.113	128.162	0.0935749	0.291881	0.6844	0.889124
Ap4b1	NM_001107709	chr2:206293719-206305702	13.2416	10.547	-0.328238	-0.72044	0.303	0.637843	12.7715	5.45237	-1.22797	-2.16604	0.00255	0.0235754	10.232	7.16862	-0.513316	-0.849253	0.2116	0.577014	5.24321	6.99016	0.414875	0.57647	0.404	0.765007
Ap4e1	NM_001191742	chr3:119484713-119548478	0.198102	0.671763	1.76171	0.908517	0.2242	0.573266	0.191502	0.697322	1.86446	0.841834	0.3633	0.591931	0.651094	0.0971085	-2.7452	-1.1658	0.28945	0.635395	0.671205	0.0945876	-2.82703	-1.22587	0.2746	0.694011
Ap4m1	NM_001037977	chr12:19314250-19320142	1.44051	1.05521	-0.449048	-0.250027	0.71845	0.886824	1.38816	1.92639	0.472725	0.224833	0.7133	0.843241	1.02552	0.0736941	-3.79866	-1.33376	0.33785	0.672169	1.85489	0.0720868	-4.68545	-1.60702	0.2382	0.678537
Ap4s1	NM_001130999	chr6:72376359-72502717	43.8607	61.4138	0.485634	0.704089	0.31915	0.649629	42.3419	45.1601	0.0929617	0.135457	0.84345	0.915619	59.5867	43.2397	-0.462635	-0.68572	0.3304	0.666227	43.4448	42.2175	-0.0413398	-0.0614399	0.92965	0.981719
Ap5b1	NM_001271032	chr1:220948317-220952337	6.26267	2.85372	-1.13393	-1.84721	0.01945	0.151381	6.0445	4.84052	-0.320461	-0.612277	0.46825	0.677858	2.77084	3.36026	0.278249	0.332186	0.66165	0.857212	4.64974	3.28136	-0.502855	-0.705963	0.37045	0.748537
Ap5m1	NM_001030036	chr15:25933482-25955745	1.59163	1.09184	-0.543751	-0.507691	0.45415	0.745844	1.53626	0.50883	-1.59417	-1.07919	0.1558	0.39085	1.05985	0.668939	-0.663915	-0.397899	0.55255	0.799922	0.490028	0.654105	0.416657	0.233374	0.7347	0.909411
Ap5s1	NM_001134618	chr3:123754056-123757349	4.11575	3.97529	-0.0500945	-0.0465389	0.9482	0.981684	3.9741	3.63765	-0.127619	-0.115406	0.89535	0.941276	3.85782	2.08391	-0.888494	-0.570003	0.42935	0.733593	3.49331	2.03455	-0.779884	-0.493533	0.5706	0.841995
Ap5z1	NM_001037220	chr12:14161997-14175997	12.0307	6.32707	-0.927106	-2.04593	0.009	0.0954506	11.6188	5.89464	-0.97899	-2.17058	0.01895	0.102658	6.14368	11.7643	0.937244	1.80633	0.0207	0.183314	5.6597	11.4909	1.02169	2.01764	0.0228	0.28915
Apaf1	NM_023979	chr7:31699871-31784192	2.16875	1.89603	-0.19388	-0.295785	0.66935	0.860457	2.09127	1.45979	-0.518621	-0.683812	0.33055	0.56201	1.8409	1.58228	-0.218407	-0.267373	0.70245	0.877066	1.40561	1.54699	0.138271	0.155178	0.82665	0.94402
Apba1	NM_031779	chr1:241594564-241796504	4.39735	4.13906	-0.0873289	-0.125804	0.85815	0.944331	4.2457	1.86477	-1.18701	-1.37165	0.05735	0.218213	4.01909	5.81169	0.532091	0.704358	0.34455	0.676709	1.79309	5.67347	1.66179	1.77913	0.02045	0.271244
Apba2	NM_031780	chr1:125367272-125547736	54.4155	38.7345	-0.490399	-1.55406	0.02895	0.1909	52.5513	48.5158	-0.115272	-0.370506	0.5938	0.766911	37.5963	59.1708	0.654296	1.88733	0.01035	0.120351	46.6351	57.7653	0.308786	0.918428	0.2055	0.655428
Apba3	NM_031781	chr7:11301956-11318900	8.88655	8.28704	-0.100768	-0.132957	0.8601	0.944737	8.58466	5.99186	-0.518758	-0.596488	0.48385	0.689878	8.03919	9.45506	0.234036	0.301709	0.71125	0.881261	5.75493	9.24213	0.683426	0.771344	0.3708	0.74859
Apbb1	NM_080478	chr1:170387629-170404045	215.51	183.849	-0.229229	-0.988663	0.174	0.511806	208.119	171.945	-0.275458	-1.27512	0.0937	0.291519	178.454	231.803	0.377347	1.53994	0.0345	0.246401	165.22	226.333	0.454056	1.98361	0.0096	0.190126
Apbb1ip	NM_001100577	chr17:90098952-90149192	8.40469	3.8408	-1.12979	-1.67842	0.0197	0.15292	8.1107	4.9346	-0.716891	-1.13384	0.10605	0.314025	3.72312	7.09142	0.929561	1.16173	0.09025	0.411207	4.74572	6.91452	0.543001	0.707033	0.2947	0.707289
Apbb3	NM_053957	chr18:29497869-29504995	19.7981	8.68571	-1.18865	-2.2312	0.0035	0.0515655	19.1079	9.67836	-0.981335	-1.81259	0.0115	0.0726371	8.43065	19.1941	1.18695	1.9079	0.0146	0.150291	9.30846	18.7379	1.00935	1.6267	0.03065	0.335064
Apc	NM_012499	chr18:27047381-27105333	27.989	17.4596	-0.680842	-2.55195	0.0003	0.00853869	27.0236	21.8325	-0.307744	-1.18463	0.0951	0.294235	16.9401	25.0181	0.562532	1.91858	0.00755	0.0993856	20.9864	24.4226	0.218763	0.771451	0.2783	0.695555
Apc2	NM_001106769	chr7:12256386-12274803	15.4016	7.60037	-1.01894	-2.95923	0.0008	0.0181364	14.8744	5.27506	-1.49557	-4.3747	5e-05	0.000964063	7.37969	12.022	0.704045	1.83891	0.02255	0.192533	5.07076	11.7438	1.21163	3.1565	0.0004	0.0199414
Apcs	NM_017170	chr13:91426620-91427417	0	0	0	0	1	1	0	0	0	0	1	1	0	0	0	0	1	1	0	0	0	0	1	1
Apeg3	NR_130955	chr1:70210848-70237450	0	0	0	0	1	1	0	0	0	0	1	1	0	0	0	0	1	1	0	0	0	0	1	1
Apeh	NM_012500	chr8:116862663-116871776	17.7415	13.6559	-0.37761	-0.787892	0.25375	0.59879	17.1308	13.2645	-0.369014	-0.765533	0.3001	0.533607	13.2406	18.1556	0.455441	0.839846	0.22045	0.586743	12.745	17.7295	0.476221	0.880395	0.23745	0.678537
Apex1	NM_024148	chr15:27849978-27852079	70.9508	83.8761	0.241441	0.71293	0.32515	0.653978	68.4789	42.7056	-0.681234	-1.68496	0.01955	0.104794	81.4043	42.8165	-0.926939	-2.19298	0.0037	0.0608647	41.0654	41.8052	0.0257596	0.0524218	0.94195	0.98396
Apex2	NM_001079892	chrX:23146084-23166676	4.18879	2.93996	-0.510737	-0.554096	0.42795	0.728593	4.04616	2.98242	-0.440068	-0.426418	0.55775	0.741694	2.85303	3.69606	0.373491	0.312994	0.6729	0.862959	2.86824	3.61359	0.333271	0.253087	0.7451	0.91418
Apex2l1	NM_001277396	chr14:71709235-71710786	0	0	0	0	1	1	0	0	0	0	1	1	0	0	0	0	1	1	0	0	0	0	1	1
Aph1a	NM_001014255	chr2:198006321-198009832	23.853	21.9015	-0.123142	-0.330934	0.6583	0.855644	23.0118	27.2255	0.242585	0.659215	0.37175	0.598135	21.267	22.0019	0.0490074	0.112235	0.87975	0.954024	26.1689	21.4724	-0.285375	-0.664423	0.3646	0.74663
Aph1b	NM_001047090	chr8:72508007-72598921	0	0	0	0	1	1	0	0.0480781	inf	0	1	1	0	0	0	0	1	1	0.0461229	0	#NAME?	0	1	1
Aph1b	NM_001047090_1	chr8:72608219-72629265	0	0	0	0	1	1	0	0.0480781	inf	0	1	1	0	0	0	0	1	1	0.0461229	0	#NAME?	0	1	1
Api5	NM_001127379	chr3:83310881-83335960	15.6916	17.0998	0.123988	0.356348	0.6104	0.831195	15.128	19.1887	0.343038	1.00182	0.1728	0.412741	16.5843	11.6272	-0.512314	-1.25875	0.0801	0.388928	18.4684	11.3456	-0.702925	-1.76271	0.01665	0.250747
Apip	NM_001106492	chr3:92969177-92995229	25.0377	17.2403	-0.538313	-0.807624	0.24605	0.592967	24.1564	20.5006	-0.236737	-0.350449	0.6136	0.779163	16.7268	20.4951	0.293113	0.368886	0.58525	0.817458	19.6911	19.9968	0.022224	0.0269851	0.96945	0.991225
Apitd1	NM_001204879	chr5:165946105-165955723	79.4342	108.69	0.45239	1.08378	0.12315	0.431504	76.6663	147.902	0.947976	2.26198	0.0033	0.0285927	105.421	114.708	0.121797	0.282552	0.68105	0.866771	142.116	111.979	-0.343836	-0.822856	0.24355	0.678537
Aplf	NM_001173382	chr4:119514821-119568722	0.70781	1.20073	0.762473	0.4733	0.4994	0.773158	0.683491	1.29599	0.923056	0.564143	0.4023	0.624807	1.16434	1.32005	0.181084	0.0849611	0.90045	0.960925	1.24968	1.28613	0.0414745	0.0198422	0.9772	0.993294
Apln	NM_031612	chrX:134856718-134866210	2.7602	5.68971	1.04359	1.52165	0.0314	0.200064	2.66139	6.14224	1.20658	1.67732	0.01985	0.106063	5.52338	4.73318	-0.222743	-0.325654	0.64065	0.846046	5.90632	4.61687	-0.355346	-0.499714	0.46195	0.792708
Aplnr	NM_031349	chr3:72540537-72544183	0.368822	0.294246	-0.325902	0	1	1	0.355399	0.00827456	-5.42461	0	1	1	0.286189	0	#NAME?	0	1	1	0.00797945	0	#NAME?	0	1	1
Aplp1	NM_001100802	chr1:88897530-88908750	1237.81	1244.77	0.00807927	0.036098	0.96265	0.985617	1195.38	1212.19	0.0201515	0.108874	0.8916	0.939515	1208.48	1040.63	-0.215727	-0.951503	0.20585	0.569595	1164.65	1016.2	-0.196711	-1.03272	0.18705	0.639299
Aplp2	NM_012906	chr8:32298525-32328821	118.245	111.127	-0.0895655	-0.274816	0.6937	0.873603	114.094	117.984	0.0483649	0.171922	0.8009	0.893983	107.764	108.908	0.0152384	0.0456609	0.9484	0.982924	113.461	106.277	-0.0943695	-0.327966	0.64125	0.870298
Aplp2	NM_022520	chr8:32298525-32328821	10.5204	20.5388	0.965154	0.509712	0.46585	0.752256	10.1108	25.9909	1.36211	0.811744	0.2308	0.476434	19.9492	21.8164	0.12908	0.10852	0.88015	0.954211	25.0253	21.3045	-0.232228	-0.277845	0.68605	0.889124
Apmap	NM_001034003	chr3:146376827-146396346	12.7438	19.599	0.620981	1.35692	0.05625	0.282167	12.2913	12.7031	0.0475491	0.0903094	0.89475	0.941122	19.0126	16.633	-0.192914	-0.389106	0.579	0.813208	12.2155	16.2384	0.410693	0.728987	0.28515	0.699706
Apoa1	NM_012738	chr8:50525090-50526875	0	0.497919	inf	0	1	1	0	0.367106	inf	0	1	1	0.484278	0	#NAME?	0	1	1	0.354001	0	#NAME?	0	1	1
Apoa1bp	NM_001106440	chr2:187424318-187426380	168.675	192.159	0.188053	0.648017	0.3651	0.687309	162.779	126.566	-0.363023	-1.19041	0.1008	0.304629	186.385	134.52	-0.470459	-1.43586	0.04535	0.287768	121.695	131.332	0.109949	0.31971	0.6601	0.87809
Apoa2	NM_013112	chr13:89597164-89598802	0	2.03923	inf	#NAME?	0.11585	0.419362	0	0	0	0	1	1	1.98325	0	#NAME?	#NAME?	0.1012	0.431608	0	0	0	0	1	1
Apoa4	NM_012737	chr8:50536982-50539371	0	0	0	0	1	1	0	0	0	0	1	1	0	0	0	0	1	1	0	0	0	0	1	1
Apoa5	NM_001277264	chr8:50559078-50561717	0	0	0	0	1	1	0	0.022334	inf	0	1	1	0	0.648245	inf	0	1	1	0.0214284	0.634109	4.88714	0	1	1
Apoa5	NM_080576	chr8:50559078-50561717	0	0	0	0	1	1	0	0.00033945	inf	0	1	1	0	0.000384407	inf	0	1	1	0.000318227	0.000367404	0.207313	0	1	1
Apob	NM_019287	chr6:33176825-33216380	0	0	0	0	1	1	0	0	0	0	1	1	0	0	0	0	1	1	0	0	0	0	1	1
Apobec1	NM_012907	chr4:155386708-155401480	0.565555	0.0475861	-3.57105	0	1	1	0.544454	0.65675	0.270532	0.101558	0.73325	0.854547	0.0462777	2.68928	5.86076	1.80594	0.2492	0.60994	0.629872	2.63073	2.06233	0.875281	0.3629	0.745657
Apobec2	NM_001106883	chr9:14529217-14542731	0	0.949441	inf	#NAME?	0.1209	0.427549	0	1.08381	inf	#NAME?	0.011	0.0701213	0.923477	0	#NAME?	#NAME?	0.1157	0.455574	1.0451	0	#NAME?	#NAME?	0.11825	0.548608
Apobec3b	NM_001033703	chr7:121109249-121128346	0.505567	0.590311	0.223574	0	1	1	0.48864	0	#NAME?	0	1	1	0.574089	0	#NAME?	0	1	1	0	0	0	0	1	1
Apobec4	NM_001017492	chr13:69909873-70174565	0	0	0	0	1	1	0	0	0	0	1	1	0	0	0	0	1	1	0	0	0	0	1	1
Apobr	NM_001109154	chr1:197999335-198003839	1.54536	1.06664	-0.534869	-0.438378	0.53845	0.795296	1.49122	1.26307	-0.239555	-0.170265	0.81395	0.900068	1.03517	1.42416	0.460253	0.277711	0.693	0.873402	1.21475	1.39103	0.195495	0.139949	0.8306	0.945192
Apoc1	NM_001109996	chr1:80606637-80609921	179.586	241.755	0.428867	1.01841	0.1468	0.469419	173.395	113.209	-0.61507	-1.23153	0.08465	0.274966	234.52	81.2504	-1.52926	-2.66952	0.001	0.0231869	108.817	79.3764	-0.455119	-0.696426	0.3233	0.723882
Apoc1	NM_012824	chr1:80606637-80609921	16.1531	14.7661	-0.129527	-0.0703833	0.9407	0.978561	15.5665	13.9347	-0.159758	-0.092759	0.92825	0.958755	14.3508	6.5982	-1.12099	-0.537634	0.65495	0.853484	13.382	6.4444	-1.05417	-0.533744	0.6622	0.878729
Apoc2	NM_001085352	chr1:80589022-80593991	0	1.94839	inf	#NAME?	0.12	0.427482	0	0	0	0	1	1	1.89499	0	#NAME?	#NAME?	0.10525	0.440923	0	0	0	0	1	1
Apoc3	NM_001271053	chr8:50529317-50531498	0	0	0	0	1	1	0	0	0	0	1	1	0	0	0	0	1	1	0	0	0	0	1	1
Apoc3	NM_012501	chr8:50529317-50531498	0	0	0	0	1	1	0	0	0	0	1	1	0	0	0	0	1	1	0	0	0	0	1	1
Apoc4	NM_001109419	chr1:80595338-80599525	5.9037	6.71165	0.185048	0.110149	0.886	0.957364	5.69749	1.07971	-2.39969	-1.01465	0.31105	0.544001	6.52832	0.0789579	-6.36948	-2.22922	0.2493	0.60994	1.04117	0.0768889	-3.75928	-1.14417	0.3849	0.755816
Apod	NM_012777	chr11:72705203-72726263	378.577	437.721	0.209427	0.829371	0.2434	0.590232	365.423	346.723	-0.0757824	-0.29807	0.67975	0.821855	424.744	257.82	-0.72023	-2.51422	0.00035	0.009932	333.327	251.591	-0.40586	-1.39449	0.04855	0.395443
Apoe	NM_001270681	chr1:80612893-80616820	11.3298	20.3656	0.846014	0.20316	0.6967	0.875622	10.9315	34.1308	1.64259	0.511558	0.5684	0.748271	19.7864	22.1308	0.161549	0.0449323	0.941	0.979813	32.7653	21.6128	-0.600279	-0.22718	0.81985	0.942208
Apoe	NM_001270682	chr1:80612893-80616820	11.7024	3.06751	-1.93167	-0.23136	0.38865	0.70389	11.2903	1.47373	-2.93754	-0.446341	0.4142	0.634977	2.97482	1.80887	-0.717708	-0.0515798	0.7493	0.898219	1.41335	1.76139	0.317593	0.0280673	0.86755	0.956994
Apoe	NM_001270683	chr1:80612893-80616820	0	0	0	0	1	1	0	0	0	0	1	1	0	0	0	0	1	1	0	0	0	0	1	1
Apoe	NM_001270684	chr1:80612893-80616820	4085.05	6081.64	0.574104	2.25568	0.0017	0.0311702	3948.2	5280.58	0.419502	1.98676	0.01335	0.0810891	5903.15	4604.12	-0.358561	-1.31279	0.069	0.360066	5072.94	4494.51	-0.174656	-0.762293	0.3336	0.729707
Apoe	NM_138828	chr1:80612893-80616820	1183.59	1843.37	0.639178	1.30074	0.0864	0.359299	1140.55	1408.5	0.304429	0.721578	0.3916	0.615697	1791.33	1173.6	-0.61009	-0.988239	0.2059	0.569595	1351.77	1146.28	-0.237896	-0.430889	0.6208	0.863382
Apof	NM_001024351	chr7:2689500-2690938	0	0	0	0	1	1	0	0	0	0	1	1	0	0	0	0	1	1	0	0	0	0	1	1
Apoh	NM_001009626	chr10:96640012-96653939	0	0	0	0	1	1	0	0	0	0	1	1	0	0	0	0	1	1	0	0	0	0	1	1
Apol3	NM_001013175	chr7:118685021-118694016	1.61061	4.70934	1.54792	1.00523	0.17565	0.513817	1.55589	1.97425	0.343562	0.17997	0.8306	0.909726	4.57302	0.580274	-2.97834	-1.51927	0.2769	0.628226	1.90379	0.567357	-1.74654	-0.774817	0.6072	0.857496
Apol3	NM_001277359	chr7:118685021-118694016	0.000140772	4.62217e-05	-1.60672	0	1	1	0.000135789	0.0916239	9.39821	0	1	1	4.49683e-05	9.90452e-05	1.13918	0	1	1	0.0878642	9.33556e-05	-9.87832	0	1	1
Apol9a	NM_001025066	chr7:118927016-118933778	0.288779	0.815151	1.4971	0.594734	0.5482	0.800905	0.278376	1.91998	2.78598	1.13941	0.30025	0.533631	0.792805	2.4468	1.62586	0.803677	0.4259	0.731986	1.84568	2.39241	0.374312	0.221422	0.7635	0.921671
Apold1	NM_001003403	chr4:168752141-168755024	0.332149	0	#NAME?	0	1	1	0.320549	0	#NAME?	0	1	1	0	0	0	0	1	1	0	0	0	0	1	1
Apom	NM_019373	chr20:5120472-5123073	1.46547	3.08434	1.0736	0.518438	0.2741	0.614728	1.41371	2.24273	0.665763	0.328388	0.34985	0.580344	2.99326	1.76827	-0.75938	-0.399048	0.4458	0.743829	2.15133	1.7281	-0.316036	-0.160567	0.59255	0.849918
Apon	NM_001009385	chr7:2675795-2677199	0	0	0	0	1	1	0	0	0	0	1	1	0	0	0	0	1	1	0	0	0	0	1	1
Apoo	NM_001199178	chrX:63521032-63625133	85.6806	74.3017	-0.205574	-0.594241	0.4037	0.713797	82.6322	47.2551	-0.806235	-2.04722	0.0051	0.0399114	72.0996	55.9173	-0.366699	-0.874755	0.21565	0.581405	45.432	54.5747	0.264523	0.555862	0.42975	0.777548
Apool	NM_001014105	chrX:83678338-83750550	8.67561	4.69529	-0.88575	-1.06299	0.11025	0.410378	8.3643	5.75565	-0.539265	-0.680166	0.33805	0.569227	4.55622	3.75364	-0.279549	-0.246509	0.72385	0.887037	5.53905	3.66046	-0.597613	-0.508125	0.51325	0.81393
Apopt1	NM_001037769	chr6:136185771-136210936	1.41945	1.24521	-0.188938	-0.0881399	0.49625	0.770909	1.37022	2.29459	0.743827	0.388551	0.5302	0.722905	1.20675	2.1093	0.805644	0.369223	0.4676	0.756372	2.20446	2.05835	-0.0989384	-0.0505801	0.9313	0.981719
Apopt1	NM_001037769_1	chr6:136279482-136304320	1.11496	0.964364	-0.209346	-0.0906377	0.3365	0.662132	1.07618	2.06824	0.942492	0.472684	0.3319	0.563488	0.934283	1.85956	0.993028	0.428859	0.50115	0.773853	1.98723	1.81476	-0.130978	-0.0654101	0.9091	0.974582
App	NM_019288	chr11:24425901-24641707	204.978	208.727	0.0261454	0.10587	0.87775	0.953971	197.925	171.022	-0.210772	-0.867898	0.2173	0.46511	202.527	157.118	-0.36627	-1.36189	0.0543	0.318082	164.395	153.371	-0.100143	-0.376301	0.5967	0.852976
Appbp2	NM_001100969	chr10:72503346-72545141	7.4818	5.39521	-0.471707	-1.22838	0.0862	0.358977	7.21432	3.97169	-0.861111	-2.07056	0.00475	0.0378033	5.23395	6.2453	0.25487	0.578446	0.42135	0.729544	3.82035	6.09246	0.673318	1.41479	0.05265	0.405967
Appl2	NM_001108741	chr7:26256458-26306126	8.32806	6.96332	-0.258205	-0.448914	0.5244	0.785459	8.03078	9.90401	0.302474	0.546763	0.4384	0.653596	6.75566	3.28143	-1.04177	-1.18475	0.09975	0.428402	9.52916	3.20468	-1.57217	-1.91878	0.0137	0.232679
Aprt	NM_001013061	chr19:55387287-55389256	188.249	232.204	0.302752	0.92699	0.2184	0.567258	181.719	197.828	0.12254	0.363201	0.63205	0.79215	225.451	181.704	-0.311219	-0.862259	0.2564	0.613162	190.122	177.433	-0.099652	-0.271007	0.7207	0.904178
Aptr	NR_130137	chr4:10747988-10809142	1.58289	1.07129	-0.563207	-0.164632	0.83645	0.936433	1.52399	2.76139	0.857537	0.367349	0.7173	0.845541	1.04153	0.50855	-1.03425	-0.273328	0.70915	0.879968	2.65988	0.496379	-2.42185	-0.797821	0.38535	0.755877
Aptx	NM_148889	chr5:56987905-57008859	5.71187	4.47703	-0.351422	-0.331974	0.64685	0.850112	5.50637	1.30661	-2.07528	-1.41361	0.05615	0.214832	4.35237	3.98485	-0.127279	-0.0947732	0.89765	0.959747	1.25848	3.88301	1.62549	0.950927	0.1213	0.551555
Aqp1	NM_012778	chr4:85551502-85563683	0.838739	0.996562	0.248737	0.14374	0.8277	0.93264	0.809674	0.947384	0.226607	0.114067	0.8755	0.932451	0.96474	2.63547	1.44985	0.847572	0.18385	0.546518	0.91177	2.57433	1.49746	0.973224	0.1576	0.60416
Aqp11	NM_173105	chr1:162703393-162713560	10.3662	9.2978	-0.156925	-0.21262	0.7793	0.910955	10.0046	4.89897	-1.0301	-1.12987	0.1105	0.322353	9.03032	8.2868	-0.123962	-0.14261	0.85755	0.945396	4.71204	8.0992	0.781429	0.730265	0.32405	0.724664
Aqp12a	NM_001109009	chr9:99557510-100504076	0.132733	0	#NAME?	0	1	1	0.128006	0	#NAME?	0	1	1	0	0	0	0	1	1	0	0	0	0	1	1
Aqp2	NM_012909	chr7:141237801-141242837	0	0	0	0	1	1	0	0	0	0	1	1	0	0	0	0	1	1	0	0	0	0	1	1
Aqp3	NM_031703	chr5:57423734-57429252	0	0	0	0	1	1	0	0	0	0	1	1	0	0	0	0	1	1	0	0	0	0	1	1
Aqp4	NM_001142366	chr18:6766008-6782757	1.78391	1.86397	0.0633332	0.0352121	0.9627	0.985617	1.72436	0.000180642	-13.2206	-0.153721	0.22605	0.472874	1.80997	0.00101845	-10.7954	-0.337845	0.2599	0.616476	0.000169102	0.000956039	2.49918	0	1	1
Aqp4	NM_001270558	chr18:6766008-6782757	4.07843	2.02169	-1.01245	-0.580707	0.3678	0.689176	3.95292	11.0265	1.47998	0.745153	0.39425	0.617961	1.96141	8.71751	2.15202	1.98427	0.01125	0.127635	10.5822	8.50085	-0.315966	-0.22326	0.6935	0.893209
Aqp4	NM_001270559	chr18:6766008-6782757	0.00564606	0.228241	5.33717	0	1	1	0.00532015	0.00201291	-1.40218	0	1	1	0.221639	0.000454348	-8.9302	0	1	1	0.00186863	0.000424996	-2.13646	0	1	1
Aqp4	NM_012825	chr18:6766008-6782757	16.5484	19.8256	0.260672	0.446198	0.4769	0.758707	15.9352	10.1955	-0.644294	-0.458256	0.44815	0.661587	19.223	9.10306	-1.07841	-1.60814	0.04425	0.284346	9.83171	8.89163	-0.144994	-0.100295	0.84365	0.949373
Aqp5	NM_012779	chr7:141249049-141252576	0	0	0	0	1	1	0	0	0	0	1	1	0	0.13673	inf	0	1	1	0	0.133746	inf	0	1	1
Aqp6	NM_022181	chr7:141258584-141261518	0	0	0	0	1	1	0	0	0	0	1	1	0	0	0	0	1	1	0	0	0	0	1	1
Aqp7	NM_019157	chr5:57358326-57372239	0	0	0	0	1	1	0	0	0	0	1	1	0	0	0	0	1	1	0	0	0	0	1	1
Aqp8	NM_019158	chr1:193424867-193430665	0	0.0224451	inf	0	1	1	0	0	0	0	1	1	0.0218323	0	#NAME?	0	1	1	0	0	0	0	1	1
Aqp9	NM_022960	chr8:77559620-77599781	1.1445	0.222836	-2.36066	-1.09295	0.2839	0.623542	1.10302	0.921912	-0.258763	-0.143704	0.83315	0.910532	0.216118	0.257316	0.251723	0	1	1	0.887648	0.250774	-1.8236	-0.755573	0.36605	0.746924
Aqr	NM_001100987	chr3:105570398-105640431	4.97791	3.3256	-0.581926	-0.96218	0.1678	0.502688	4.80346	2.71773	-0.821673	-1.25258	0.0702	0.244563	3.21918	3.11456	-0.0476648	-0.0628788	0.92915	0.974872	2.61621	3.03885	0.216049	0.261565	0.6981	0.894348
Ar	NM_012502	chrX:67656252-67828998	1.95411	1.44366	-0.436783	-0.46075	0.48345	0.762961	1.88511	0.781001	-1.27125	-0.979552	0.1329	0.355299	1.40023	1.01688	-0.461513	-0.326503	0.6044	0.825782	0.751846	0.990849	0.398229	0.254728	0.6733	0.883425
Araf	NM_001033663	chrX:1321314-1390873	115.786	175.985	0.603989	1.73926	0.0157	0.135441	111.601	146.509	0.392645	1.15398	0.1049	0.311959	170.682	104.26	-0.71112	-1.52528	0.05005	0.304028	140.964	101.674	-0.471376	-1.03983	0.15575	0.602412
Araf	NM_022532	chrX:1321314-1390873	2.7406	2.08304	-0.395801	-0.176501	0.8472	0.940369	2.64764	5.4313	1.03659	0.528258	0.67465	0.818742	2.02523	5.37374	1.40784	0.556386	0.6521	0.851959	5.21557	5.25293	0.010296	0.00540177	0.98315	0.994318
Arap2	NM_001107216	chr14:48726044-48922807	4.93169	2.85713	-0.787516	-1.64639	0.02075	0.157415	4.75552	4.86457	0.0327101	0.0763906	0.91835	0.953201	2.77011	6.01303	1.11815	2.09976	0.00485	0.0745264	4.68479	5.8698	0.325327	0.721939	0.3377	0.731755
Arc	NM_019361	chr7:115907096-115910541	19.2437	26.0852	0.438845	1.34414	0.09245	0.374603	18.597	32.0891	0.787014	2.53993	0.00585	0.0444744	25.3216	94.666	1.90248	6.19123	5e-05	0.0020606	30.8262	92.4485	1.58449	5.96253	5e-05	0.00359193
Arcn1	NM_001007662	chr8:49051256-49075861	25.8511	20.8018	-0.313517	-0.979593	0.1634	0.495323	24.9406	19.9873	-0.319407	-0.959338	0.17135	0.410533	20.1885	24.8323	0.298679	0.828675	0.2391	0.605433	19.2117	24.2344	0.33507	0.903045	0.2	0.652525
Areg	NM_017123	chr14:18521929-18531179	0	1.52073	inf	#NAME?	0.0003	0.00853869	0	0.833018	inf	#NAME?	0.1221	0.339109	1.47739	0.0512352	-4.84977	-1.48489	0.2481	0.60994	0.798783	0.0498891	-4.00101	-1.19002	0.48175	0.802292
Arel1	NM_001106744	chr6:108635219-108663764	8.32239	5.67726	-0.551805	-1.2275	0.08455	0.35514	8.03042	4.76393	-0.753323	-1.52693	0.0344	0.154156	5.51007	6.69353	0.280696	0.5265	0.4552	0.750388	4.58275	6.53228	0.511373	0.885743	0.19095	0.644073
Arf1	NM_022518	chr10:45563546-45579029	231.698	201.141	-0.204044	-0.723718	0.3113	0.644187	223.729	80.8316	-1.46876	-4.2975	5e-05	0.000964063	195.243	111.465	-0.808677	-2.28395	0.002	0.039402	77.7059	108.785	0.485377	1.15225	0.10745	0.533834
Arf2	NM_024150	chr10:92018561-92040335	14.6757	12.4202	-0.240745	-0.532503	0.4665	0.752498	14.1587	8.18766	-0.790165	-1.52133	0.03335	0.151126	12.0567	16.1899	0.425263	0.83782	0.24815	0.60994	7.86508	15.7993	1.00633	1.71969	0.0201	0.269694
Arf3	NM_080904	chr7_AABR07046136v1_random:7146-12932	0	0	0	0	1	1	0	0	0	0	1	1	0	0	0	0	1	1	0	0	0	0	1	1
Arf3	NM_080904_1	chr7:140412467-140417530	425.404	342.21	-0.313952	-1.41328	0.0522	0.270312	410.413	293.276	-0.484814	-2.45368	0.00105	0.0118244	332.127	377.476	0.184649	0.794757	0.27535	0.62792	281.965	368.578	0.386451	1.84164	0.01325	0.228731
Arf4	NM_024151	chr16:2338332-2354909	80.6145	77.726	-0.0526434	-0.183158	0.78905	0.91573	77.7402	69.3346	-0.165085	-0.575662	0.4244	0.643297	75.407	72.7978	-0.0508027	-0.159593	0.81775	0.928273	66.724	71.065	0.0909348	0.28782	0.6883	0.89018
Arf5	NM_024149	chr4:55715743-55718670	915.479	798.277	-0.197638	-0.908805	0.22305	0.5717	883.621	1038.84	0.233469	1.26467	0.1187	0.333938	774.947	1125.31	0.53815	2.38734	0.00215	0.0411748	998.077	1099.08	0.139071	0.728649	0.3772	0.752458
Arf6	NM_024152	chr6:91697108-91698257	37.7458	47.1645	0.321385	0.758645	0.29785	0.63327	36.4069	27.7802	-0.390157	-0.801187	0.2626	0.502278	45.8056	26.0823	-0.812455	-1.55145	0.03505	0.248806	26.712	25.4538	-0.0696067	-0.117379	0.8644	0.956311
Arfgap1	NM_145090	chr3:176475892-176489925	14.3949	11.1657	-0.366485	-0.636034	0.36215	0.684289	13.9007	14.2689	0.03771	0.0667967	0.93265	0.961437	10.839	11.15	0.0408088	0.0586597	0.9367	0.978372	13.7132	10.8955	-0.331838	-0.481813	0.5294	0.822048
Arfgap2	NM_001033707	chr3:80081646-80093659	24.0395	18.3516	-0.3895	-1.00568	0.15395	0.479475	23.1949	17.0333	-0.445452	-1.08636	0.1234	0.340381	17.8099	21.2357	0.253815	0.571295	0.4221	0.730428	16.3767	20.7323	0.340231	0.729633	0.30875	0.714745
Arfgap3	NM_001044273	chr7:124149745-124198263	9.89132	15.7377	0.669987	1.34485	0.0653	0.306153	9.55042	11.4063	0.256196	0.466717	0.5221	0.716261	15.2756	11.6737	-0.387972	-0.728214	0.3331	0.66842	10.9576	11.405	0.0577367	0.0987099	0.89995	0.970248
Arfgef1	NM_001277056	chr5:8666199-8760458	10.3416	10.1348	-0.0291444	-0.0862394	0.90165	0.964481	9.97818	10.46	0.0680381	0.197828	0.78245	0.882297	9.82768	16.5843	0.754898	2.17061	0.0025	0.0457732	10.0659	16.1785	0.6846	1.98945	0.00855	0.177858
Arfgef2	NM_181083	chr3:163570621-163653817	2.74301	1.5748	-0.800592	-0.975323	0.1525	0.477118	2.64607	1.8698	-0.50097	-0.624483	0.40195	0.624776	1.52701	1.3785	-0.14761	-0.139065	0.8423	0.939553	1.79516	1.34611	-0.415315	-0.412143	0.56255	0.836951
Arfip1	NM_021763	chr2:183504329-183582553	1.5111	0.994153	-0.604061	-0.368082	0.6013	0.826432	1.45764	0.871599	-0.741902	-0.492264	0.4701	0.679099	0.963022	0.946992	-0.024216	-0.0132548	0.98595	0.99551	0.840277	0.92546	0.139307	0.0747979	0.57575	0.843568
Arfip2	NM_001004222	chr1:170466393-170471076	37.7274	43.4652	0.204247	0.57095	0.4315	0.73121	36.4298	40.5025	0.152894	0.406675	0.56785	0.748242	42.1888	37.9768	-0.151743	-0.373357	0.59855	0.822996	38.9354	37.0761	-0.0705938	-0.166122	0.8144	0.939175
Arfrp1	NM_053980	chr3:176859165-176865085	93.1716	93.2769	0.00163013	0.00432473	0.99445	0.997207	89.9557	74.0803	-0.280124	-0.679785	0.33155	0.563135	90.4295	82.3075	-0.135769	-0.315898	0.65165	0.851753	71.2745	80.3136	0.172259	0.369708	0.60205	0.855444
Arg1	NM_017134	chr1:21525420-21537870	7.26601	5.98098	-0.280781	-0.325127	0.6457	0.84946	7.00813	2.76548	-1.3415	-1.16564	0.11175	0.324142	5.79812	0.0353526	-7.35762	-3.26054	0.1754	0.537632	2.65787	0.034504	-6.26736	-2.7312	0.1692	0.620037
Arg2	NM_019168	chr6:102311096-102338406	5.74001	9.2306	0.68537	0.825482	0.21575	0.564627	5.53563	7.07595	0.354176	0.37468	0.5972	0.769024	8.94503	8.46723	-0.0791951	-0.091742	0.892	0.957998	6.79914	8.27785	0.283903	0.30277	0.66435	0.879559
Arglu1	NM_001024972	chr16:86600876-86625084	133.06	207.45	0.640681	2.50544	0.0006	0.0147454	128.277	174.189	0.441391	1.76522	0.0131	0.0800267	201.215	175.103	-0.200538	-0.761014	0.28255	0.631234	167.532	170.822	0.0280595	0.110375	0.8732	0.959439
Arhgap1	NM_001107747	chr3:80555195-80576881	12.1676	9.51249	-0.355152	-0.812716	0.2557	0.59966	11.7426	8.98389	-0.386337	-0.858871	0.24345	0.487607	9.23002	6.00587	-0.619962	-1.03186	0.1453	0.495217	8.63345	5.86232	-0.558465	-0.917193	0.1931	0.644931
Arhgap10	NM_001109501	chr19:34139996-34402436	3.01753	2.18032	-0.468828	-0.429713	0.54605	0.799754	2.91215	4.85812	0.738313	0.826907	0.21805	0.46578	2.11444	5.39146	1.3504	1.16442	0.1103	0.448124	4.66715	5.26372	0.17354	0.202562	0.78775	0.93082
Arhgap11a	NM_001168524	chr3:105281826-105298108	1.17229	0.387639	-1.59654	-1.04481	0.1644	0.49681	1.12862	0.0135919	-6.37566	-1.83613	0.2399	0.48472	0.375569	0	#NAME?	0	1	1	0.0130322	0	#NAME?	0	1	1
Arhgap12	NM_001107357	chr17:54280850-54394634	4.95347	3.60924	-0.456743	-0.875692	0.21585	0.564627	4.77354	7.02941	0.558346	1.21528	0.09225	0.288925	3.50056	3.92442	0.164892	0.259852	0.6979	0.874913	6.76561	3.83404	-0.819353	-1.46668	0.037	0.357214
Arhgap15	NM_001013917	chr3:28627083-29236225	3.82014	6.23262	0.706213	0.696956	0.33495	0.66153	3.68796	8.6223	1.22525	1.20923	0.075	0.255144	6.04049	4.12468	-0.550384	-0.499546	0.43155	0.735432	8.30033	4.02692	-1.04349	-0.899421	0.1955	0.646744
Arhgap17	NM_001270692	chr1:193239035-193328371	0.352703	0.5834	0.726031	0	1	1	0.339699	0.246653	-0.461774	0	1	1	0.567546	1.11127	0.969405	0.350157	0.6867	0.868936	0.237904	1.08684	2.19169	0.635044	0.4853	0.804235
Arhgap17	NM_001270693	chr1:193239035-193328371	0.000183146	3.64e-05	-2.33099	0	1	1	0.000174656	0.209421	10.2277	0	1	1	3.40384e-05	0.000454626	3.73945	0	1	1	0.201879	0.000425914	-8.88871	0	1	1
Arhgap17	NM_001270694	chr1:193239035-193328371	0.000413021	0.000219119	-0.9145	0	1	1	0.000391273	0.796992	10.9922	0.166828	0.3747	0.601064	0.000204003	0	#NAME?	0	1	1	0.768424	0	#NAME?	#NAME?	0.19695	0.648552
Arhgap17	NM_022244	chr1:193239035-193328371	0.680151	1.3599	0.999573	0.549917	0.50365	0.774587	0.658306	2.16452	1.71721	0.944737	0.3064	0.538843	1.31882	1.91703	0.539625	0.295145	0.7002	0.875663	2.08089	1.86679	-0.156645	-0.084064	0.8941	0.968273
Arhgap18	NM_001170575	chr1:19227118-19376301	2.56026	1.7007	-0.590158	-0.483189	0.48995	0.766391	2.46642	0.457916	-2.42926	-1.4227	0.0378	0.165223	1.65049	5.12544	1.63478	1.03294	0.1443	0.49354	0.440134	5.00379	3.50701	2.06566	0.11355	0.542082
Arhgap20	NM_213629	chr8:56179815-56261194	7.2694	3.3361	-1.12367	-1.85041	0.0146	0.129191	7.01572	5.13497	-0.450237	-0.799859	0.26425	0.503816	3.23936	5.05319	0.641487	0.859997	0.21235	0.578117	4.92992	4.92897	-0.000275646	-0.000397778	0.9988	0.999109
Arhgap21	NM_001191693	chr17:87725977-87849729	49.8178	14.8624	-1.745	-6.17929	5e-05	0.0023396	48.1087	10.5039	-2.19537	-7.33203	5e-05	0.000964063	14.4181	35.8558	1.31432	4.14397	5e-05	0.0020606	10.0965	35.0018	1.79357	5.33727	5e-05	0.00359193
Arhgap22	NM_001107297	chr16:9563217-9613503	9.39345	4.84992	-0.953695	-1.20756	0.09505	0.380545	9.06875	8.17311	-0.150019	-0.224745	0.7776	0.879395	4.70597	9.09164	0.95005	1.06325	0.1337	0.479503	7.85129	8.87849	0.177385	0.240752	0.7604	0.920234
Arhgap24	NM_001012032	chr14:8383315-8432076	1.28453	1.7529	0.448503	0.346349	0.59245	0.823817	1.24059	2.36767	0.932435	0.563443	0.39795	0.620781	1.69909	0.488109	-1.79949	-1.05457	0.09585	0.423728	2.27391	0.476881	-2.25347	-1.31788	0.06295	0.435976
Arhgap25	NM_001109247	chr4:119249681-119327822	4.85982	5.22438	0.104355	0.156185	0.8197	0.929305	4.69361	10.5446	1.16773	1.80529	0.0189	0.102481	5.06374	8.17426	0.690884	1.00573	0.15155	0.504431	10.1399	7.97575	-0.34635	-0.576033	0.41445	0.769398
Arhgap26	NM_001107389	chr18:31728372-32670678	25.0324	20.5426	-0.28518	-0.582983	0.40385	0.713847	24.1757	9.64882	-1.32513	-2.1441	0.00635	0.0470253	19.9223	16.2075	-0.29772	-0.502418	0.47095	0.758433	9.27877	15.8242	0.770131	1.0577	0.14125	0.580148
Arhgap27	NM_198759	chr10:91419911-91448477	3.3651	1.78781	-0.912454	-0.896876	0.2063	0.55389	3.25118	1.87366	-0.7951	-0.838537	0.3748	0.601064	1.73474	1.80207	0.0549327	0.0394911	0.95535	0.985045	1.79997	1.75799	-0.0340522	-0.0261803	0.97135	0.991809
Arhgap28	NM_001191815	chr9:116057235-116222440	0.375883	0.0869789	-2.11155	0	1	1	0.362893	0.0267989	-3.7593	0	1	1	0.084548	1.01597	3.58694	1.62415	0.23285	0.600161	0.0257623	0.992098	5.26715	2.1919	0.18	0.635107
Arhgap29	NM_001009405	chr2:225552147-225611639	0.784142	0.665128	-0.237484	-0.174763	0.79985	0.921441	0.757406	0.719074	-0.0749268	-0.0537701	0.9342	0.961869	0.644697	0.958429	0.572051	0.337442	0.61645	0.833216	0.69247	0.936344	0.435288	0.263995	0.68845	0.890204
Arhgap30	NM_001109077	chr13:89774763-89796113	1.31705	1.27448	-0.0474071	-0.0403752	0.9499	0.981931	1.2714	1.73526	0.448726	0.371115	0.614	0.779502	1.23546	0.640059	-0.948778	-0.602567	0.392	0.71376	1.6657	0.624522	-1.41531	-0.924717	0.2074	0.656151
Arhgap31	NM_001105879	chr11:64600967-64714114	0.578607	0.629113	0.120736	0	1	1	0.559144	0.250966	-1.15573	0	1	1	0.610337	0.207907	-1.55367	0	1	1	0.241577	0.202519	-0.254422	0	1	1
Arhgap35	NM_001271132	chr1:78456408-78573374	24.4764	21.2675	-0.202741	-0.775571	0.2721	0.612592	23.631	25.3372	0.100577	0.399815	0.5829	0.75926	20.6334	29.6438	0.522752	1.87316	0.0086	0.108669	24.351	28.9487	0.24952	0.941735	0.19535	0.646744
Arhgap39	NM_173122	chr7:117788715-117880289	14.2148	7.2944	-0.962535	-2.3175	0.0021	0.0367202	13.7237	6.84238	-1.0041	-2.3664	0.0024	0.0225442	7.078	14.6214	1.04667	2.28382	0.0038	0.062159	6.57821	14.2886	1.11909	2.42444	0.0033	0.100973
Arhgap4	NM_144740	chrX:156873889-156888762	2.7242	1.11577	-1.28779	-1.12308	0.14285	0.463925	2.63049	1.05326	-1.32047	-1.09292	0.1071	0.315982	1.08311	2.4032	1.14978	0.745896	0.2811	0.630393	1.01284	2.34854	1.21336	0.752375	0.31445	0.718619
Arhgap5	NM_001047869	chr6:73358111-73365933	17.233	14.1666	-0.282683	-0.813666	0.26065	0.603518	16.6055	21.47	0.370658	1.12033	0.1281	0.347218	13.7271	15.6975	0.193501	0.496703	0.5114	0.779157	20.6553	15.3064	-0.432375	-1.19257	0.1199	0.550959
Arhgap8	NM_001004242	chr7:125732299-125795964	0	0.545516	inf	0	1	1	0	0	0	0	1	1	0.53059	0	#NAME?	0	1	1	0	0	0	0	1	1
Arhgap9	NM_001012198	chr7:70612769-70629964	5.12464	3.28648	-0.640907	-0.593993	0.4018	0.713115	4.94826	4.0925	-0.273939	-0.25231	0.72275	0.848272	3.18781	2.65389	-0.264459	-0.1603	0.83635	0.937395	3.94003	2.58518	-0.607946	-0.384232	0.63755	0.870178
Arhgap9	NM_001080789	chr7:70612769-70629964	0	0	0	0	1	1	0	0	0	0	1	1	0	0	0	0	1	1	0	0	0	0	1	1
Arhgdia	NM_001007005	chr10:109754016-109757506	201.36	184.376	-0.12713	-0.601836	0.4618	0.750274	194.501	156.897	-0.309961	-1.56159	0.06975	0.243574	179.077	169.719	-0.077426	-0.3356	0.6776	0.864805	150.73	165.772	0.137237	0.626829	0.4624	0.792955
Arhgdib	NM_001009600	chr4:170913925-170932578	26.2633	27.7553	0.0797163	0.16165	0.82545	0.93142	25.3492	29.5349	0.220478	0.433721	0.5638	0.745312	26.9652	34.163	0.341332	0.639474	0.38545	0.70907	28.3629	33.338	0.233159	0.429316	0.5597	0.835869
Arhgef1	NM_021694	chr1:81769211-81797237	10.5105	6.93206	-0.600481	-1.12889	0.14685	0.469419	10.1519	5.5506	-0.871036	-1.46301	0.0644	0.232153	6.73372	7.08783	0.073941	0.108929	0.8892	0.95724	5.33528	6.9195	0.375102	0.511928	0.49905	0.808518
Arhgef11	NM_023982	chr2:186980991-187114005	9.51842	5.10475	-0.898881	-1.5006	0.0394	0.230451	9.1945	1.76933	-2.37757	-3.01685	0.0019	0.018892	4.95447	2.12334	-1.2224	-1.30808	0.0788	0.385021	1.7003	2.07332	0.286155	0.238559	0.74955	0.915235
Arhgef12	NM_001013246	chr8:47259376-47393042	3.66992	5.50372	0.584659	0.925337	0.16815	0.502688	3.54388	2.46353	-0.524601	-0.654678	0.34095	0.571075	5.33873	2.35762	-1.17916	-1.41421	0.05445	0.318481	2.36798	2.30135	-0.041175	-0.04164	0.9542	0.987586
Arhgef15	NM_001105789	chr10:55532128-55544429	1.36678	0.643664	-1.0864	-0.838238	0.21935	0.56807	1.32072	0.551713	-1.25934	-0.967668	0.29465	0.527607	0.623564	0.0856269	-2.8644	-1.29377	0.3034	0.645475	0.529685	0.0836972	-2.66188	0	1	1
Arhgef16	NM_001127591	chr5:171626449-171648501	1.6294	1.18583	-0.458445	-0.378343	0.6208	0.837372	1.57481	0	#NAME?	#NAME?	5e-05	0.000964063	1.15225	0	#NAME?	#NAME?	0.00025	0.00765289	0	0	0	0	1	1
Arhgef18	NM_001107115	chr12:1889330-1998127	15.5232	10.0767	-0.623405	-1.8231	0.01195	0.115434	14.9856	6.39197	-1.22924	-3.34876	5e-05	0.000964063	9.77489	13.1255	0.425219	1.08574	0.13535	0.481864	6.14149	12.8202	1.06176	2.52364	0.00165	0.061561
Arhgef19	NM_001108692	chr5:159755534-159773699	2.01538	3.06494	0.604809	0.699774	0.31395	0.645446	1.9447	1.70843	-0.186875	-0.182023	0.8047	0.895189	2.97669	4.37089	0.554217	0.712991	0.375	0.700677	1.64207	4.27068	1.37895	1.38799	0.1127	0.541091
Arhgef2	NM_001012079	chr2:187993797-188021373	27.9912	15.8891	-0.816939	-2.47405	0.00065	0.0155178	27.0135	21.3182	-0.341594	-1.08579	0.13145	0.352226	15.419	31.3999	1.02605	2.82531	0.0002	0.00633859	20.4847	30.6543	0.581547	1.71333	0.0197	0.268375
Arhgef25	NM_199395	chr7:70469310-70476340	65.1339	70.4435	0.113057	0.379526	0.5919	0.823716	62.8771	81.8266	0.380035	1.28619	0.0751	0.255336	68.3774	85.8643	0.32854	1.04243	0.14755	0.499094	78.6419	83.8336	0.09223	0.300629	0.67625	0.885487
Arhgef28	NM_001108542	chr2:25738513-26011429	4.342	3.95975	-0.132949	-0.244108	0.7297	0.891459	4.19047	1.66006	-1.33588	-1.87693	0.0125	0.0774921	3.838	3.9554	0.0434676	0.0683509	0.9201	0.970879	1.59704	3.86087	1.27353	1.50531	0.0419	0.374116
Arhgef3	NM_001106061	chr16:2958282-3026760	14.8872	9.66826	-0.622744	-1.50238	0.03435	0.211265	14.3614	20.2897	0.498551	1.32345	0.05535	0.212883	9.38337	15.8224	0.75379	1.61979	0.02555	0.207369	19.4986	15.4432	-0.336396	-0.823814	0.241	0.678537
Arhgef37	NM_001100974	chr18:56817985-56870839	0.0141239	0	#NAME?	0	1	1	0.0136558	0.0210195	0.622214	0	1	1	0	0.0575689	inf	0	1	1	0.0202692	0.0563148	1.47423	0	1	1
Arhgef39	NM_001106676	chr5:58998209-59001779	7.86684	10.3646	0.397813	0.582133	0.4207	0.724605	7.59311	13.9782	0.880416	1.28813	0.08395	0.273602	10.0597	13.3735	0.410786	0.603025	0.40195	0.719209	13.4353	13.0653	-0.0402886	-0.0624344	0.93005	0.981719
Arhgef40	NM_001271313	chr15:28377995-28406046	4.08326	3.83039	-0.0922304	-0.151985	0.83255	0.934392	3.94365	3.57172	-0.142913	-0.244526	0.75405	0.865876	3.7166	3.02265	-0.298172	-0.424354	0.58185	0.815807	3.43129	2.95366	-0.216248	-0.326132	0.68345	0.888572
Arhgef6	NM_001005565	chrX:159724064-159840804	0.497033	0.380106	-0.386941	0	1	1	0.479745	0.178492	-1.42641	0	1	1	0.36773	0.148068	-1.31239	0	1	1	0.172119	0.144279	-0.254542	0	1	1
Arhgef7	NM_001113521	chr16:83006731-83084975	4.77616	3.24305	-0.558499	-0.564518	0.3947	0.707848	4.60611	10.69	1.21464	1.31812	0.10185	0.306465	3.14748	3.10752	-0.018434	-0.0233494	0.9756	0.991838	10.2718	3.03401	-1.75939	-2.59015	0.00335	0.101165
Arhgef7	NM_001113522	chr16:83006731-83084975	6.02872	3.54963	-0.764183	-0.901015	0.25995	0.603518	5.82774	2.16795	-1.4266	-1.49177	0.11645	0.331185	3.44595	11.3431	1.71884	2.91224	0.0008	0.0192777	2.08148	11.0783	2.41206	3.24732	0.0062	0.14575
Arhgef7	NM_053740	chr16:83006731-83084975	0.144315	0.0614642	-1.2314	0	1	1	0.139099	0.212075	0.608459	0	1	1	0.0594755	0.12662	1.09014	0	1	1	0.203392	0.123305	-0.722027	0	1	1
Arhgef9	NM_023957	chrX:64249580-64428444	58.016	57.199	-0.0204598	-0.078265	0.91055	0.967347	55.9404	57.0343	0.0279393	0.108005	0.8794	0.934504	55.4872	61.445	0.147139	0.522801	0.46115	0.753804	54.8692	59.9506	0.127777	0.461786	0.5153	0.814676
Arid1a	NM_001106635	chr5:151904688-151947719	22.568	22.7452	0.0112776	0.0433975	0.95325	0.982422	21.7927	15.3088	-0.50949	-1.86888	0.0141	0.0839483	22.0829	20.8429	-0.0833684	-0.288065	0.6967	0.874913	14.7119	20.3479	0.467897	1.53992	0.0407	0.370076
Arid3a	NM_001108066	chr7:12541055-12793634	0.35154	0.0811994	-2.11415	0	1	1	0.339025	1.1226	1.72738	0.269924	0.54295	0.730602	0.0789296	1.5504	4.29593	0.336932	0.1672	0.526188	1.07783	1.51528	0.491465	0.131465	0.82015	0.942272
Arid3b	NM_001109001	chr8:62569750-62614308	0.320288	0.775179	1.27516	0.744143	0.2602	0.603518	0.308649	0.389529	0.335762	0	1	1	0.752189	0.760581	0.016006	0.00840283	0.99125	0.997938	0.375473	0.743141	0.984927	0.478031	0.4429	0.780718
Arid3c	NM_001173981	chr5:58107706-58113553	0	0	0	0	1	1	0	0	0	0	1	1	0	0	0	0	1	1	0	0	0	0	1	1
Arid4a	NM_001108029	chr6:93461712-93532901	14.8907	19.889	0.417567	1.2905	0.07055	0.319139	14.3563	15.628	0.122452	0.367515	0.61675	0.781217	19.2922	13.1705	-0.550706	-1.50999	0.03165	0.235267	15.04	12.8559	-0.226372	-0.608641	0.39975	0.763726
Arid4b	NM_053421	chr17:53831779-53954813	0.133512	0.105667	-0.337451	0	1	1	0.128574	0.122203	-0.0733212	0	1	1	0.102298	0.196568	0.942259	0	1	1	0.117492	0.191603	0.705566	0	1	1
Arid4b	NM_053421_1	chr17:53231342-53773657	0.108831	0.132335	0.282105	0	1	1	0.104825	0.118418	0.175896	0	1	1	0.128076	0.239244	0.901485	0	1	1	0.11384	0.23322	1.03468	0	1	1
Arid5a	NM_001034934	chr9:42880216-42884856	2.25912	2.84525	0.332795	0.294581	0.66115	0.856968	2.17954	2.40821	0.143934	0.132554	0.8734	0.931145	2.76209	2.27568	-0.279466	-0.222095	0.75135	0.898358	2.31092	2.22063	-0.0575008	-0.0427504	0.9586	0.988032
Arid5b	NM_001107624	chr20:21564983-21881193	12.4417	15.5318	0.320044	0.86576	0.23725	0.5849	12.0171	11.6571	-0.0438835	-0.108132	0.8799	0.934844	15.0797	14.3909	-0.0674507	-0.167499	0.81665	0.927816	11.2056	14.0521	0.326565	0.745893	0.3115	0.71633
Arih1	NM_001013108	chr8:64166358-64268555	5.73725	5.05412	-0.182899	-0.409936	0.554	0.804346	5.53073	5.70037	0.0435876	0.0975017	0.8876	0.938094	4.90316	5.27871	0.106475	0.207464	0.7631	0.903684	5.48123	5.15371	-0.0888872	-0.173938	0.80325	0.936531
Arih2	NM_001012275	chr8:117387005-117446019	11.9258	11.1488	-0.0971966	-0.236638	0.7424	0.899087	11.5098	12.7829	0.151352	0.364489	0.60525	0.772998	10.8157	19.092	0.819832	1.90357	0.0099	0.117222	12.2857	18.6459	0.60188	1.4065	0.0514	0.401956
Arl1	NM_022385	chr7:29282410-29293455	73.0269	36.2743	-1.00948	-2.11341	0.0051	0.0661417	70.4305	32.519	-1.11492	-2.19787	0.00385	0.0323538	35.1717	19.939	-0.818821	-1.08753	0.1172	0.458846	31.282	19.4784	-0.68346	-0.896422	0.179	0.634093
Arl10	NM_207165	chr17:10568958-10575203	2.87396	1.19405	-1.26717	-0.609975	0.3904	0.704912	2.77284	3.95325	0.511676	0.292221	0.6814	0.822832	1.15993	1.69526	0.547474	0.244754	0.7043	0.877778	3.79543	1.65827	-1.19459	-0.615673	0.4988	0.808502
Arl11	NM_001013433	chr15:41643540-41645685	3.79335	0.77489	-2.29141	-1.27138	0.13245	0.445999	3.65843	2.20954	-0.727477	-0.491699	0.4499	0.663335	0.74972	3.68449	2.29704	1.14158	0.2896	0.635485	2.12823	3.60059	0.758578	0.462354	0.4944	0.807728
Arl13a	NM_001024366	chrX:105011488-105037803	0	0	0	0	1	1	0	0	0	0	1	1	0	0	0	0	1	1	0	0	0	0	1	1
Arl13b	NM_001107101	chr7:1122566-1188209	5.38116	3.72967	-0.528869	-0.882204	0.21095	0.55909	5.18937	3.26011	-0.670636	-1.09578	0.15955	0.396272	3.61675	4.38589	0.278173	0.403437	0.59015	0.819436	3.14062	4.27291	0.44417	0.631216	0.45495	0.789372
Arl14	NR_131117	chr2:165759332-165791609	0	0	0	0	1	1	0	0	0	0	1	1	0	0	0	0	1	1	0	0	0	0	1	1
Arl14ep	NM_001014045	chr3:97983681-97993684	12.8743	16.0752	0.320347	0.494348	0.4674	0.752681	12.4204	14.0957	0.182546	0.256714	0.7275	0.851544	15.586	11.7434	-0.408401	-0.537547	0.4481	0.744961	13.568	11.4557	-0.244146	-0.310804	0.647	0.872473
Arl2	NM_031711	chr1:221504172-221516116	306.944	315.086	0.0377717	0.140981	0.84125	0.938216	296.418	244.824	-0.275887	-1.02919	0.16575	0.403884	305.788	203.832	-0.585149	-1.91994	0.0088	0.109418	235.313	199.004	-0.241789	-0.785498	0.296	0.707289
Arl2bp	NM_001024906	chr19:10753669-10763110	212.791	150.805	-0.496754	-2.05506	0.00405	0.0562004	205.358	141.765	-0.53464	-2.28585	0.0013	0.014046	146.32	227.293	0.635423	2.46373	0.00045	0.0122625	136.33	221.947	0.703113	2.81736	5e-05	0.00359193
Arl3	NM_022700	chr1:266287017-266322856	523.371	657.105	0.328289	1.2936	0.06445	0.304611	505.406	637.139	0.334165	1.34677	0.05465	0.211091	637.372	516.602	-0.303081	-1.11771	0.1135	0.452564	612.501	504.244	-0.280591	-1.06165	0.12415	0.551555
Arl4a	NM_019186	chr6:59948575-59950586	32.7093	42.7176	0.385127	0.842131	0.2271	0.577023	31.5465	22.1997	-0.506944	-0.931662	0.1769	0.419119	41.4509	35.4751	-0.224599	-0.450163	0.51995	0.782474	21.3431	34.6119	0.697501	1.1484	0.10965	0.53715
Arl4c	NM_001306054	chr9:95783650-95787092	11.08	14.8276	0.420318	1.08191	0.12405	0.432038	10.6852	10.2271	-0.0632218	-0.146203	0.83325	0.910532	14.3895	10.6572	-0.433194	-0.978751	0.1778	0.538898	9.83187	10.4009	0.0811646	0.166601	0.8101	0.937742
Arl4d	NM_001107052	chr10:89578211-89580368	6.82549	7.73259	0.180019	0.212856	0.76815	0.907306	6.58896	5.15165	-0.355016	-0.372681	0.6052	0.772998	7.49904	26.0983	1.79918	2.22098	0.0072	0.0966325	4.95161	25.484	2.36362	2.31879	0.01625	0.248608
Arl5a	NM_053979	chr3:37926509-37947434	3.1296	6.54994	1.0655	0.906997	0.1961	0.542963	3.01681	5.27061	0.804947	0.682143	0.31525	0.54825	6.36079	5.3648	-0.245681	-0.219793	0.7552	0.899618	5.07276	5.23002	0.0440466	0.0385134	0.95565	0.987667
Arl5b	NM_001015031	chr17:82066011-82088843	0.611261	0.204822	-1.57742	0	1	1	0.589455	0.886523	0.588776	0.316961	0.6888	0.82793	0.199079	0.448882	1.173	0	1	1	0.854747	0.437715	-0.965508	-0.585258	0.43995	0.780718
Arl5c	NM_001109046	chr10:85941176-85947938	0.276398	0.520857	0.91414	0	1	1	0.26623	0.296505	0.155385	0	1	1	0.506274	0.531755	0.0708429	0	1	1	0.284494	0.520162	0.870563	0	1	1
Arl6	NM_001108842	chr11:42858741-42879242	21.9194	27.4986	0.327146	0.614107	0.3801	0.696602	21.1339	18.831	-0.166449	-0.278798	0.69105	0.829504	26.6865	17.9274	-0.573939	-0.901542	0.1858	0.548188	18.1272	17.4988	-0.0509022	-0.0724243	0.9167	0.976384
Arl6ip1	NM_198737	chr1:187770159-187779675	103.022	153.811	0.578201	2.34724	0.00105	0.0224141	99.3486	118.491	0.254212	1.04214	0.1413	0.368676	149.224	109.263	-0.449669	-1.70785	0.01565	0.156406	113.983	106.668	-0.0956924	-0.365869	0.60905	0.85822
Arl6ip4	NM_001025630	chr12:37904375-37906521	242.163	328.262	0.438869	1.7778	0.0209	0.158347	233.939	273.723	0.226589	0.933658	0.2247	0.471289	318.767	240.41	-0.407003	-1.52786	0.043	0.280016	262.985	234.72	-0.164044	-0.625083	0.42265	0.773405
Arl6ip5	NM_023972	chr4:129574362-129598240	101.632	122.3	0.267071	0.630433	0.3666	0.688582	98.0664	92.2935	-0.0875296	-0.186892	0.78705	0.885865	118.677	56.2162	-1.07798	-1.93032	0.0104	0.120692	88.8187	54.8371	-0.69571	-1.14437	0.1153	0.544546
Arl6ip6	NM_001024310	chr3:38742071-38768011	2.62699	3.66278	0.479528	0.523136	0.47585	0.757655	2.53031	1.2394	-1.02967	-0.891348	0.23925	0.484242	3.55035	2.07636	-0.773904	-0.693403	0.2811	0.630393	1.19326	2.02779	0.764997	0.502313	0.52335	0.817871
Arl8a	NM_001109071	chr13:51972973-51981976	188.68	173.499	-0.121012	-0.534711	0.48395	0.762961	182.153	136.583	-0.415369	-1.89078	0.0153	0.0891018	168.432	158.893	-0.0841135	-0.338212	0.6607	0.85667	131.263	155.175	0.24144	0.991295	0.20015	0.652625
Arl8b	NM_001024332	chr4:140837744-140881866	96.5995	70.068	-0.46326	-1.83834	0.01065	0.107865	93.1739	62.9188	-0.566435	-2.29755	0.0013	0.014046	67.9568	72.2672	0.0887229	0.322248	0.64965	0.851234	60.5238	70.5232	0.220594	0.814828	0.2495	0.679537
Arl9	NM_212459	chr14:33436979-33444235	0	0	0	0	1	1	0	0	0	0	1	1	0	0	0	0	1	1	0	0	0	0	1	1
Armc1	NM_001106425	chr2:103927155-103979597	12.3958	21.6835	0.806742	1.92046	0.008	0.0882036	11.9594	21.3644	0.837063	1.95343	0.00785	0.0542603	21.0371	11.7983	-0.834355	-1.75128	0.01415	0.147878	20.5587	11.5193	-0.835705	-1.71857	0.02005	0.269694
Armc10	NM_001106576	chr4:10004845-10020017	23.7772	18.5897	-0.355076	-0.798486	0.26125	0.603734	22.9411	22.6178	-0.0204773	-0.0465926	0.9458	0.968435	18.0392	21.1448	0.229163	0.453634	0.5192	0.782474	21.7545	20.6459	-0.0754621	-0.15092	0.8303	0.945109
Armc12	NM_001113777	chr20:8109690-8120182	0	0	0	0	1	1	0	0	0	0	1	1	0	0	0	0	1	1	0	0	0	0	1	1
Armc3	NM_001287020	chr17:85914586-86009402	1.11508	0.631757	-0.819707	-0.509788	0.4515	0.744733	1.07488	1.3525	0.331453	0.196516	0.7701	0.875983	0.613519	1.14642	0.901954	0.473369	0.4886	0.767687	1.29823	1.11997	-0.213084	-0.11994	0.877	0.961731
Armc5	NM_001009455	chr1:199655646-199662414	13.7079	10.9969	-0.317911	-0.852285	0.33635	0.662132	13.233	17.38	0.393287	1.1879	0.2113	0.459397	10.6847	18.2887	0.775402	1.96692	0.03225	0.23836	16.6918	17.8772	0.0989837	0.296032	0.77235	0.924358
Armc6	NM_001107306	chr16:20910176-20949732	4.13409	3.31607	-0.318095	-0.180515	0.80685	0.924588	3.9911	3.05979	-0.383353	-0.247362	0.7524	0.864801	3.219	3.56276	0.146385	0.0585974	0.9297	0.974975	2.93935	3.47107	0.239882	0.0966542	0.8774	0.962043
Armc7	NM_001127522	chr10:104036366-104054805	3.29155	0.919733	-1.83948	-0.782178	0.24915	0.595535	3.17438	1.474	-1.10674	-0.877062	0.22855	0.474839	0.890307	2.50909	1.49479	0.587584	0.3459	0.677845	1.41678	2.45137	0.790966	0.540792	0.4838	0.803162
Armc8	NM_001173354	chr8:107723358-107819050	5.3065	4.473	-0.246518	-0.476747	0.4932	0.768392	5.11905	5.78006	0.175209	0.348989	0.62035	0.784166	4.339	4.6454	0.0984401	0.164647	0.81655	0.927816	5.56112	4.53271	-0.295001	-0.515271	0.46545	0.794161
Armc9	NM_001109663	chr9:93172717-93299119	11.0273	6.87331	-0.681998	-1.63605	0.02485	0.176072	10.6496	7.20741	-0.563242	-1.28202	0.06805	0.240504	6.672	10.5927	0.66688	1.3868	0.0596	0.334351	6.93365	10.3445	0.577169	1.17529	0.0971	0.512344
Armcx1	NM_001024367	chrX:105535669-105539568	0.13485	0.135046	0.00209462	0	1	1	0.130055	0.175346	0.431083	0	1	1	0.130861	0.149813	0.195132	0	1	1	0.168593	0.146132	-0.206278	0	1	1
Armcx1	NM_001024367_1	chrX:105911924-105915823	0.13485	0.135046	0.00209462	0	1	1	0.130055	0.1542	0.245675	0	1	1	0.130861	0.137883	0.0754175	0	1	1	0.148251	0.134515	-0.140274	0	1	1
Armcx2	NM_001014274	chrX:105617382-105622156	30.8424	25.3238	-0.28442	-0.940576	0.18865	0.530615	29.7783	18.2159	-0.70906	-2.17811	0.0032	0.0279119	24.5716	23.2604	-0.0791122	-0.224629	0.75805	0.901145	17.5087	22.7167	0.375682	0.992946	0.1723	0.623536
Armcx3	NM_001014273	chrX:105573908-105577480	36.9464	35.2559	-0.0675686	-0.194255	0.7821	0.912255	35.6204	23.6555	-0.590529	-1.52914	0.03525	0.156945	34.1935	25.1243	-0.444637	-1.06538	0.1392	0.487235	22.7561	24.51	0.107115	0.235048	0.74035	0.912311
Armcx6	NM_001007757	chrX:105565744-105568343	6.2077	6.51037	0.0686802	0.0937348	0.8906	0.959995	5.98989	2.63491	-1.18478	-1.21728	0.0815	0.269299	6.31231	4.3798	-0.527304	-0.573502	0.39975	0.717323	2.534	4.27603	0.754856	0.611985	0.40295	0.764497
Armt1	NM_001017447	chr1:40982861-41006370	11.8341	8.58909	-0.462372	-0.883707	0.2101	0.558754	11.4101	12.9395	0.181467	0.369346	0.5943	0.766911	8.33341	10.2705	0.301531	0.490965	0.46285	0.754617	12.4439	10.0301	-0.311093	-0.543524	0.43205	0.777993
Arnt	NM_012780	chr2:196594302-196651179	0.834441	0.690925	-0.272282	-0.149913	0.8334	0.934865	0.804372	0.135686	-2.56759	-1.17783	0.30555	0.538184	0.671691	0.0759274	-3.1451	-1.35335	0.27625	0.62792	0.130269	0.0741372	-0.813224	0	1	1
Arnt2	NM_012781	chr1:146399216-146556143	20.944	17.4852	-0.260405	-0.899711	0.20405	0.55152	20.216	28.4566	0.493265	1.77843	0.0141	0.0839484	16.9667	27.8146	0.713135	2.31262	0.00205	0.0400488	27.3568	27.1634	-0.0102369	-0.0358618	0.96185	0.988779
Arntl	NM_024362	chr1:178039062-178137471	13.8473	9.97855	-0.472699	-0.981475	0.16585	0.499665	13.3554	13.2101	-0.0157842	-0.0334145	0.96465	0.979099	9.67371	12.5083	0.370744	0.664414	0.3395	0.672934	12.7003	12.2107	-0.0567154	-0.105523	0.8781	0.962208
Arntl2	NM_133391	chr4:181103773-181158415	0.110601	0	#NAME?	0	1	1	0.106986	0.112232	0.0690612	0	1	1	0	0	0	0	1	1	0.107621	0	#NAME?	0	1	1
Arpc1a	NM_031146	chr12:10716426-11677818	258.82	294.235	0.185019	0.384746	0.5836	0.818285	249.833	269.774	0.110786	0.246444	0.73015	0.852799	285.525	241.181	-0.243498	-0.462932	0.5148	0.780033	259.263	235.479	-0.138818	-0.285149	0.701	0.89549
Arpc1b	NM_019289	chr12:10716426-11677818	34.2774	29.7037	-0.206616	-0.120335	0.87355	0.952581	33.0888	42.1571	0.349434	0.249129	0.7484	0.862769	28.8333	41.4105	0.522261	0.287688	0.69845	0.874913	40.4983	40.4394	-0.00209888	-0.00158313	0.99845	0.998882
Arpc2	NM_001106919	chr9:81518194-81548871	220.679	215.238	-0.0360132	-0.141681	0.8396	0.937716	212.92	183.473	-0.214746	-0.85043	0.22895	0.475041	208.806	198.411	-0.0736754	-0.266468	0.70305	0.877093	176.488	193.583	0.133382	0.48699	0.4899	0.804906
Arpc3	NM_001105933	chr12:39653950-39667817	523.67	570.613	0.123855	0.498837	0.47015	0.754019	505.424	584.845	0.21056	0.871613	0.20935	0.457619	553.53	518.875	-0.0932721	-0.349713	0.61945	0.834804	562.289	506.584	-0.150509	-0.580638	0.41075	0.768452
Arpc4	NM_001106615	chr4:145330456-145340985	259.337	264.359	0.027668	0.113934	0.871	0.950995	250.193	240.776	-0.0553457	-0.234104	0.7451	0.861166	256.536	228.591	-0.16639	-0.633426	0.3689	0.695276	231.522	223.116	-0.0533547	-0.207825	0.7701	0.923864
Arpc5	NM_001025717	chr13:70174969-70183881	50.7598	64.8784	0.35405	1.19602	0.094	0.378133	48.9558	58.8992	0.266767	0.86763	0.2111	0.459397	62.9664	47.0986	-0.418897	-1.25353	0.077	0.381509	56.6314	45.9909	-0.300255	-0.870617	0.20905	0.656852
Arpc5l	NM_001037767	chr3:23301454-23309077	97.4951	136.551	0.486037	1.68053	0.01865	0.148508	94.0378	110.73	0.235732	0.786206	0.26415	0.503763	132.444	106.024	-0.320982	-1.02764	0.14445	0.493619	106.485	103.476	-0.0413561	-0.128424	0.8535	0.952839
Arpin	NM_001107530	chr1:141664789-141672789	6.92899	12.384	0.837762	1.32369	0.06715	0.311467	6.68558	6.70814	0.00485912	0.00644811	0.9926	0.995317	12.026	9.2516	-0.378377	-0.554717	0.4551	0.750388	6.4478	9.03808	0.487209	0.612833	0.38935	0.758216
Arpp19	NM_031660	chr8:81949876-81968589	43.9483	62.7414	0.513609	0.571769	0.4295	0.729427	42.4052	91.03	1.1021	1.16244	0.1102	0.321602	60.8445	64.0496	0.074061	0.0788978	0.9086	0.966017	87.5608	62.4858	-0.486758	-0.550292	0.4422	0.780718
Arpp19	NM_031660_1	chr8:119105995-119106334	12.754	17.2138	0.432621	0.257289	0.70125	0.877819	12.3105	25.0656	1.02583	0.644683	0.3796	0.604955	16.7005	16.4159	-0.0247986	-0.0133218	0.9838	0.994803	24.1144	16.0066	-0.591226	-0.381152	0.57665	0.843818
Arpp21	NM_001135045	chr8:120323900-120446507	49.7413	51.3255	0.0452313	0.101929	0.8859	0.957345	48.062	61.1943	0.3485	0.863827	0.2295	0.475089	49.7996	55.8735	0.16603	0.338705	0.6408	0.846046	58.8069	54.558	-0.108194	-0.240057	0.7339	0.909385
Arpp21	NM_001135046	chr8:120323900-120446507	94.7911	131.205	0.469	1.65103	0.0218	0.162224	91.368	107.666	0.236796	0.846245	0.23535	0.480831	127.31	93.6243	-0.443388	-1.38989	0.05075	0.306048	103.538	91.3653	-0.180439	-0.568847	0.41335	0.769269
Arr3	NM_001190993	chrX:70440063-70452138	0	0	0	0	1	1	0	0.43747	inf	0	1	1	0	0	0	0	1	1	0.421852	0	#NAME?	0	1	1
Arrb1	NM_012910	chr1:164502451-164568430	1.36478	1.88699	0.467415	0.269635	0.7202	0.888047	1.31788	0.53895	-1.29	-0.64857	0.3436	0.573956	1.83437	0.445985	-2.04022	-0.917523	0.3388	0.672697	0.517609	0.436157	-0.247014	0	1	1
Arrb2	NM_012911	chr10:57040250-57048045	18.5434	18.837	0.0226676	0.0455021	0.9477	0.981427	17.9075	18.4977	0.0467811	0.089819	0.90035	0.943995	18.2837	13.0243	-0.489352	-0.800122	0.28045	0.630393	17.7793	12.7205	-0.483037	-0.755205	0.31905	0.721152
Arrdc1	NM_001100770	chr3:2129877-2136936	11.6062	9.04186	-0.360201	-0.576184	0.45235	0.744949	11.2107	2.39772	-2.22514	-2.3209	0.01505	0.0881274	8.77747	5.47272	-0.681548	-0.790415	0.2745	0.627243	2.30484	5.34415	1.21329	0.801576	0.27865	0.695555
Arrdc2	NM_001107303	chr16:20352479-20356612	14.8866	14.5555	-0.0324531	-0.0749413	0.9264	0.97443	14.3774	18.0608	0.329058	0.838174	0.3626	0.591369	14.1365	15.4019	0.123689	0.250128	0.7605	0.902462	17.3447	15.0429	-0.205409	-0.46695	0.6125	0.859939
Arrdc3	NM_001007797	chr2:8733166-8742871	2.17505	0.513343	-2.08306	-1.05663	0.289	0.626176	2.09672	2.07035	-0.018258	-0.00919735	0.9899	0.993509	0.498949	1.70806	1.77539	0.804762	0.3928	0.714366	1.9906	1.66995	-0.253396	-0.137363	0.83415	0.946753
Arrdc4	NM_001047853	chr1:129767226-129776276	0.144002	0.0349516	-2.04266	0	1	1	0.139367	0.403227	1.53271	0	1	1	0.0339906	0.0314008	-0.114334	0	1	1	0.388831	0.0307177	-3.662	0	1	1
Arrdc5	NM_001109408	chr9:10760112-10766199	0.142156	0	#NAME?	0	1	1	0.137531	0	#NAME?	0	1	1	0	0	0	0	1	1	0	0	0	0	1	1
Arsa	NM_001034933	chr7:130448290-130450817	13.5878	10.4588	-0.377595	-0.596181	0.411	0.718439	13.1198	10.3756	-0.338554	-0.517739	0.47595	0.683842	10.1486	12.1739	0.262512	0.346551	0.63765	0.844432	9.97606	11.8891	0.253099	0.327988	0.6586	0.877333
Arsb	NM_033443	chr2:23385153-23543028	12.2519	9.00287	-0.444547	-0.707142	0.3124	0.644504	11.8349	6.60246	-0.841974	-1.27738	0.10915	0.319731	8.73653	5.24775	-0.735362	-0.812776	0.2964	0.639932	6.34182	5.12802	-0.306494	-0.347174	0.68525	0.889124
Arse	NM_001047885	chr2:122877285-122884360	2.13968	2.71849	0.345411	0.270649	0.67825	0.864527	2.06536	2.365	0.195448	0.135171	0.8611	0.926032	2.63525	2.0598	-0.355432	-0.236368	0.75265	0.898687	2.27226	2.01214	-0.175396	-0.125887	0.89205	0.967594
Arsg	NM_001047877	chr10:97773868-97858810	0.82715	1.63526	0.983302	0.474603	0.4649	0.751864	0.798723	2.62424	1.71613	0.971901	0.205	0.453658	1.58378	0.382602	-2.04946	-0.876839	0.33965	0.672934	2.51769	0.374253	-2.75001	-1.26969	0.271	0.69126
Arsi	NM_001047881	chr18:56180088-56186068	0.182073	0	#NAME?	0	1	1	0.175526	0	#NAME?	0	1	1	0	0.201365	inf	0	1	1	0	0.196912	inf	0	1	1
Arsj	NM_001047887	chr2:230163013-230662084	0.445615	0.773331	0.795288	0.273545	0.65285	0.853396	0.429166	1.0794	1.33062	0.45927	0.64085	0.796933	0.750474	2.36388	1.65528	0.734873	0.3973	0.716802	1.03701	2.309	1.15483	0.536784	0.50485	0.811146
Arsk	NM_001047917	chr2:2835567-2891059	1.49825	0.337988	-2.14823	-1.07605	0.3101	0.643494	1.44327	0	#NAME?	#NAME?	0.00015	0.00238596	0.327039	0.299064	-0.12901	0	1	1	0	0.291233	inf	0	1	1
Art1	NM_001107541	chr1:167192808-167206615	0	0.259238	inf	0	1	1	0	0.219066	inf	0	1	1	0.252179	0	#NAME?	0	1	1	0.210173	0	#NAME?	0	1	1
Art2b	NM_198735	chr1:166667319-166670639	0	0	0	0	1	1	0	0	0	0	1	1	0	0	0	0	1	1	0	0	0	0	1	1
Art3	NM_001012034	chr14:17143037-17225389	4.86437	3.37786	-0.526142	-0.462731	0.50575	0.775878	4.69568	8.50497	0.856974	0.847001	0.2677	0.506087	3.27948	4.83968	0.561446	0.391327	0.61165	0.830154	8.16718	4.72744	-0.788779	-0.720183	0.36825	0.748299
Art4	NM_001173509	chr4:170830850-170841187	0	0	0	0	1	1	0	0.165308	inf	0	1	1	0	0	0	0	1	1	0.159406	0	#NAME?	0	1	1
Art5	NM_001013039	chr1:167192808-167206615	0	0	0	0	1	1	0	0	0	0	1	1	0	0	0	0	1	1	0	0	0	0	1	1
Artn	NM_053397	chr5:136759716-136762986	0.0204812	0.516516	4.65644	0	1	1	0.0197648	0.0162666	-0.281026	0	1	1	0.499825	1.92198	1.9431	0.78775	0.5576	0.802425	0.0156857	1.87996	6.9051	1.49727	0.4995	0.808746
Arv1	NM_001106197	chr19:57484719-57496539	28.701	23.0403	-0.316942	-0.584527	0.4134	0.719957	27.6993	20.3241	-0.446657	-0.776047	0.27955	0.51463	22.3536	34.6738	0.633342	1.05312	0.13445	0.480746	19.5373	33.8505	0.792943	1.27103	0.0866	0.496503
Arvcf	NM_001131013	chr11:86736124-86793791	21.7035	10.8742	-0.997019	-2.47746	0.0012	0.0248453	20.958	13.4208	-0.643033	-1.76216	0.03045	0.141765	10.551	19.5179	0.887421	1.93684	0.0119	0.132232	12.8951	19.0664	0.56421	1.38344	0.0981	0.514421
Arx	NM_001100174	chrX:62363756-62376137	11.0236	9.3291	-0.240785	-0.517789	0.55035	0.801942	10.6463	8.08029	-0.397869	-0.836016	0.2981	0.530856	9.06467	8.5461	-0.0849886	-0.156443	0.8555	0.945254	7.76426	8.35136	0.105162	0.190895	0.8238	0.943099
As3mt	NM_080890	chr1:266482857-266514570	5.91465	4.38074	-0.433119	-0.449375	0.5099	0.777579	5.71484	5.06592	-0.173888	-0.170872	0.8031	0.894861	4.24531	2.49663	-0.765887	-0.524912	0.42475	0.731521	4.87441	2.43846	-0.999256	-0.614432	0.33645	0.731016
Asah1	NM_053407	chr16:53998603-54030006	10.7671	19.8284	0.880939	2.02557	0.0066	0.0783825	10.3781	14.4749	0.480015	1.03002	0.1538	0.38841	19.2064	7.06484	-1.44286	-2.65161	0.0017	0.0347844	13.9278	6.89141	-1.0151	-1.73969	0.03	0.332675
Asah2	NM_053646	chr1:250557043-250630729	0.885066	2.42081	1.45163	1.50896	0.04805	0.257367	0.853749	0.63883	-0.418379	-0.295319	0.64145	0.797425	2.34504	1.11096	-1.07781	-1.12168	0.12715	0.470479	0.613127	1.08424	0.822419	0.595479	0.325	0.725526
Asap1	NM_001044245	chr7:104670075-104951090	7.77148	8.94009	0.202099	0.395583	0.5772	0.815568	7.50329	16.7041	1.15461	2.37867	0.00225	0.021375	8.67315	21.6447	1.31938	2.71643	0.00055	0.0145128	16.0568	21.1228	0.39562	0.930896	0.18665	0.638696
Asb1	NM_001108232	chr9:98668230-98684900	5.42281	4.78165	-0.181532	-0.224971	0.7553	0.903822	5.2361	5.44658	0.0568568	0.0707166	0.92635	0.957637	4.64328	3.42707	-0.438168	-0.397972	0.63595	0.84378	5.23231	3.34984	-0.643354	-0.662422	0.4148	0.769398
Asb10	NM_001109216	chr4:7158969-7167501	0	0	0	0	1	1	0	0	0	0	1	1	0	0	0	0	1	1	0	0	0	0	1	1
Asb11	NM_001106962	chrX:31758564-31780425	0	0	0	0	1	1	0	0.683154	inf	#NAME?	0.08505	0.275807	0	0.752072	inf	#NAME?	0.0633	0.343221	0.655254	0.735325	0.166328	0.076613	0.5934	0.850361
Asb12	NM_001037367	chrX:64714349-64800662	0	0	0	0	1	1	0	0	0	0	1	1	0	0	0	0	1	1	0	0	0	0	1	1
Asb13	NM_001108420	chr17:70215400-70234103	5.44269	5.25915	-0.0494922	-0.0567483	0.9328	0.975931	5.2482	8.21657	0.646715	0.802305	0.24745	0.490922	5.10598	7.68218	0.58933	0.657826	0.34695	0.678598	7.89746	7.49566	-0.0753322	-0.0921578	0.8911	0.967434
Asb14	NM_001170749	chr16:2537247-2556735	0.0173737	0.62163	5.16108	0	1	1	0.0167285	0.396004	4.56513	0	1	1	0.603264	1.90766	1.66094	0.796935	0.2203	0.586743	0.381393	1.85862	2.28488	1.02547	0.32825	0.727553
Asb16	NM_001109048	chr10:90217978-90224983	1.30914	0	#NAME?	#NAME?	0.00015	0.00511574	1.26437	0.0360112	-5.13383	-2.05234	0.17725	0.419473	0	0	0	0	1	1	0.0345471	0	#NAME?	0	1	1
Asb17	NM_001109676	chr2:259379652-260753677	0	0	0	0	1	1	0	0	0	0	1	1	0	0	0	0	1	1	0	0	0	0	1	1
Asb18	NM_001108231	chr9:97085233-97151832	0.36793	0.641126	0.801175	0	1	1	0.355184	0.00677952	-5.71124	0	1	1	0.623757	0	#NAME?	0	1	1	0.00653734	0	#NAME?	0	1	1
Asb2	NM_001011984	chr6:127212324-127248247	1.70213	1.81823	0.0951902	0.078266	0.92095	0.972054	1.64328	0.865885	-0.924327	-0.446065	0.42855	0.645903	1.76725	3.28061	0.892457	0.633308	0.41305	0.724509	0.833959	3.19995	1.94	1.07366	0.0832	0.489173
Asb3	NM_001108864	chr14:115352715-115446618	5.95528	3.03417	-0.972869	-0.919061	0.18305	0.524191	5.7429	2.28804	-1.32767	-0.732255	0.25885	0.499753	2.9448	3.79772	0.36696	0.288	0.67675	0.864805	2.19626	3.70492	0.754392	0.399217	0.50795	0.812465
Asb4	NM_001024318	chr4:30461977-30499608	0.225367	0.575023	1.35134	0	1	1	0.217989	0	#NAME?	0	1	1	0.559269	0	#NAME?	0	1	1	0	0	0	0	1	1
Asb5	NM_001044247	chr16:39985232-40025401	0.0304372	0.0190834	-0.673519	0	1	1	0.0294298	0.319776	3.44171	0	1	1	0.0184614	0	#NAME?	0	1	1	0.308364	0	#NAME?	0	1	1
Asb6	NM_001011963	chr3:9659707-9664318	34.3329	27.0085	-0.346177	-0.952179	0.20605	0.553727	33.1471	33.7681	0.0267817	0.0755191	0.92215	0.955824	26.227	39.1371	0.577483	1.4469	0.05535	0.321328	32.4503	38.2128	0.235825	0.61989	0.42505	0.773706
Asb7	NM_001108915	chr1:127539361-127599257	1.30442	0.665593	-0.970699	-0.480232	0.4591	0.749057	1.25849	0.153068	-3.03946	-1.43187	0.2878	0.521062	0.644832	0.137708	-2.22731	-0.800077	0.34045	0.673565	0.146908	0.134707	-0.125087	0	1	1
Asb8	NM_001108109	chr7:139724337-139731876	42.1854	28.2062	-0.580732	-1.68784	0.0216	0.161455	40.7077	16.5769	-1.29613	-3.29756	5e-05	0.000964063	27.3626	31.4524	0.200966	0.498573	0.4712	0.758433	15.9301	30.7062	0.946774	2.0721	0.00565	0.137575
Asb9	NM_001191913	chrX:31700636-31736596	0	0	0	0	1	1	0	0	0	0	1	1	0	0	0	0	1	1	0	0	0	0	1	1
Ascc1	NM_001007632	chr20:29558688-29648894	40.5108	30.5928	-0.405116	-0.958056	0.17205	0.508757	39.1034	37.3687	-0.0654624	-0.151806	0.8259	0.906472	29.6942	28.3763	-0.0654954	-0.127495	0.85425	0.944819	35.9519	27.6949	-0.37645	-0.729109	0.29605	0.707289
Ascc2	NM_001109091	chr14:84873506-84913923	1.95658	2.88818	0.561828	0.514013	0.4353	0.734541	1.88772	2.98341	0.660319	0.543223	0.4651	0.674965	2.80343	2.34122	-0.259935	-0.210268	0.77035	0.907168	2.86434	2.2861	-0.325314	-0.253354	0.7444	0.91418
Ascc3	NM_001277057	chr20:55253685-55556473	3.22658	3.01025	-0.100126	-0.187423	0.79325	0.918211	3.11331	1.98443	-0.649725	-1.02772	0.1169	0.33174	2.9178	2.80376	-0.0575177	-0.0928263	0.89485	0.958985	1.90634	2.735	0.520736	0.719724	0.297	0.707896
Ascl1	NM_022384	chr7:28038661-28040492	2.87145	7.08381	1.30275	1.02874	0.1444	0.466243	2.77018	12.0479	2.12073	1.86677	0.0183	0.10053	6.8833	4.98349	-0.465945	-0.454214	0.55515	0.801371	11.5682	4.86321	-1.25018	-1.1598	0.159	0.605729
Ascl2	NM_031503	chr1:216154001-216156409	0.958927	0.160756	-2.57655	-0.976266	0.2732	0.613062	0.924795	0.0912049	-3.34195	-1.57171	0.25855	0.49942	0.156378	2.99952	4.26162	1.77553	0.20165	0.565933	0.0875308	2.92508	5.06254	3.19162	0.2503	0.680036
Ascl3	NM_001271234	chr1:174351412-174352058	0	0	0	0	1	1	0	0	0	0	1	1	0	0.0401322	inf	0	1	1	0	0.0390803	inf	0	1	1
Asf1a	NM_001106389	chr20:34894418-34909265	6.83155	9.60553	0.491651	1.05155	0.13975	0.458697	6.585	4.88122	-0.431941	-0.81295	0.2604	0.501013	9.30844	5.42672	-0.778459	-1.40558	0.0539	0.316853	4.69859	5.29607	0.172694	0.278237	0.70565	0.897656
Asf1b	NM_001107160	chr19:25077917-25092491	0.605515	0.049912	-3.6007	0	1	1	0.584153	0	#NAME?	0	1	1	0.0482916	0	#NAME?	0	1	1	0	0	0	0	1	1
Asgr1	NM_012503	chr10:56662241-56666086	4.7541	4.26143	-0.157835	-0.120111	0.86215	0.945834	4.58234	13.0603	1.51103	1.34069	0.07265	0.250862	4.13491	6.73757	0.704372	0.549382	0.4002	0.71773	12.5552	6.57625	-0.932948	-0.795244	0.2513	0.680036
Asgr2	NM_017189	chr10:56710488-56723601	1.28809	0.65215	-0.981961	-0.477326	0.5433	0.798105	1.24479	1.69002	0.441138	0.247724	0.7069	0.839929	0.634304	0.237265	-1.41868	0	1	1	1.62095	0.232092	-2.80407	-1.06906	0.4002	0.763726
Ash1l	NM_001107689	chr2:188253377-188389250	11.6014	12.2588	0.0795107	0.288008	0.67975	0.864599	11.1924	11.6355	0.0560104	0.200117	0.7764	0.878999	11.8888	12.8643	0.113772	0.381223	0.5824	0.816214	11.1962	12.5571	0.165488	0.554199	0.43245	0.777993
Ash2l	NM_001106089	chr16:71011340-71032790	9.81454	11.3521	0.209963	0.399998	0.5683	0.80984	9.46763	8.7137	-0.119719	-0.207866	0.769	0.875326	11.0193	10.901	-0.0155718	-0.0267433	0.971	0.989668	8.38138	10.642	0.344511	0.542258	0.44885	0.78458
Asic1	NM_024154	chr7:141326320-141354937	13.9346	15.2967	0.134551	0.397987	0.61575	0.834942	13.454	11.5697	-0.217684	-0.593393	0.44785	0.661561	14.855	12.2813	-0.274492	-0.700059	0.3733	0.699312	11.1182	11.9978	0.109842	0.260279	0.74185	0.912782
Asic2	NM_001034014	chr10:68247799-69347223	39.643	52.2043	0.3971	1.21556	0.088	0.364011	38.2724	33.4953	-0.192348	-0.544176	0.4464	0.660667	50.6565	41.1697	-0.299162	-0.856088	0.23645	0.602745	32.2052	40.1991	0.31987	0.837814	0.2404	0.678537
Asic2	NM_012892	chr10:68247799-69347223	5.19262	4.88699	-0.0875154	-0.0662434	0.92325	0.973217	5.0159	0.750387	-2.7408	-1.54009	0.26475	0.503923	4.73961	1.93158	-1.29499	-0.752511	0.44025	0.739861	0.720576	1.88736	1.38915	0.637998	0.6361	0.869706
Asic3	NM_173135	chr4:7288854-7292901	0.372864	1.02578	1.46	0.670648	0.3028	0.637757	0.359796	0	#NAME?	0	1	1	0.992532	0.969056	-0.0345341	-0.0154908	0.83665	0.937395	0	0.947912	inf	#NAME?	0.12485	0.551555
Asic4	NM_022234	chr9:82647070-82668920	13.9643	12.5686	-0.151919	-0.337299	0.6591	0.855923	13.4847	5.53169	-1.28553	-2.22002	0.0108	0.0694125	12.2047	5.43826	-1.16622	-1.73517	0.03995	0.267013	5.31618	5.31303	-0.000856858	-0.00108301	0.99785	0.998882
Asic5	NM_022227	chr2:180935391-180964365	0	0	0	0	1	1	0	0	0	0	1	1	0	0	0	0	1	1	0	0	0	0	1	1
Asip	NR_131764	chr3:150492009-150579870	0	0	0	0	1	1	0	0	0	0	1	1	0	0	0	0	1	1	0	0	0	0	1	1
Asl	NM_021577	chr12:30160997-30178346	11.9434	9.18567	-0.378751	-0.59803	0.39905	0.711254	11.5281	17.7039	0.618915	1.05991	0.1302	0.350694	8.91426	13.9838	0.649571	0.915435	0.18265	0.545186	17.0174	13.6433	-0.318821	-0.504584	0.4728	0.797144
Asmt	NM_144759	chr12:18521400-18526250	2.35697	3.06507	0.378985	0.247757	0.7555	0.903849	2.27559	1.05066	-1.11494	-0.58353	0.4085	0.630105	2.97725	0.210908	-3.81929	-1.68156	0.21645	0.581405	1.0114	0.206298	-2.29355	-0.922578	0.28465	0.69924
Asmtl	NM_001105915	chr12:18532095-18534761	187.891	182.455	-0.0423518	-0.137915	0.85025	0.942056	181.371	293.722	0.695505	2.44257	0.0026	0.0239057	177.164	260.855	0.558162	1.74796	0.02095	0.18413	282.211	254.728	-0.147818	-0.528066	0.5038	0.810424
Asna1	NM_001100505	chr19:26133024-26141111	107.749	88.227	-0.288377	-0.967059	0.181	0.521512	104.05	69.6805	-0.578457	-1.77608	0.01575	0.0906863	85.6407	95.2772	0.153834	0.455513	0.53415	0.789681	67.0068	93.0446	0.473615	1.29422	0.0759	0.472335
Asns	NM_013079	chr4:33743363-33760716	38.979	18.1017	-1.10657	-2.65821	0.00065	0.0155178	37.596	13.4622	-1.48166	-3.15631	0.0001	0.00170145	17.5529	27.3028	0.637336	1.2856	0.06945	0.361121	12.9449	26.6545	1.042	1.8716	0.0121	0.218329
Asnsd1	NM_001106763	chr9:52988041-53009054	27.2116	24.6478	-0.142763	-0.396519	0.57505	0.814371	26.2493	21.3519	-0.297913	-0.780761	0.2647	0.50391	23.9174	20.6262	-0.213581	-0.50369	0.47315	0.75958	20.531	20.131	-0.0283836	-0.0631711	0.9306	0.981719
Aspa	NM_024399	chr10:59867778-59888198	18.7342	18.6104	-0.00957116	-0.0198571	0.97745	0.991031	18.0739	21.5947	0.256769	0.529584	0.4571	0.668976	18.0481	16.8745	-0.0970059	-0.173627	0.8103	0.925162	20.7723	16.468	-0.334994	-0.612669	0.39065	0.758733
Aspdh	NM_001009643	chr1:100471065-100473327	0.619126	0.504204	-0.296227	0	1	1	0.597817	0.536687	-0.155623	-0.0616628	0.4874	0.691453	0.490388	0.359413	-0.448279	0	1	1	0.516835	0.350911	-0.558598	-0.200095	0.6742	0.884004
Aspg	NM_144750	chr6:136682278-136701673	0.271285	0	#NAME?	0	1	1	0.261809	0.0462899	-2.49975	0	1	1	0	1.66983	inf	#NAME?	0.0001	0.00359969	0.0446372	1.63335	5.19344	1.64367	0.19965	0.652282
Asphd2	NM_001009716	chr12:50269346-50278974	64.0935	75.091	0.228463	0.834692	0.2885	0.626176	61.8642	51.773	-0.256904	-0.918893	0.27695	0.513159	72.9285	66.7659	-0.127372	-0.427782	0.5901	0.819436	49.7339	65.208	0.390819	1.29085	0.1366	0.571398
Aspm	NM_001105955	chr13:56546020-56591793	0.194099	0.0932146	-1.05817	0	1	1	0.187152	0.122465	-0.611835	0	1	1	0.0902836	0.458351	2.34392	0	1	1	0.117813	0.446317	1.92157	0	1	1
Aspn	NM_001014008	chr17:14656006-14679409	0	0	0	0	1	1	0	0	0	0	1	1	0	0	0	0	1	1	0	0	0	0	1	1
Aspn	NM_001014008_1	chr17:15496518-15519197	0	0	0	0	1	1	0	0	0	0	1	1	0	0	0	0	1	1	0	0	0	0	1	1
Asrgl1	NM_145089	chr1:225309738-225329743	196.801	211.129	0.101384	0.366584	0.5956	0.824737	189.889	164.222	-0.209505	-0.728872	0.29595	0.528956	204.842	167.286	-0.292194	-0.94637	0.17925	0.541044	157.877	163.248	0.0482662	0.150687	0.82955	0.944906
Ass1	NM_013157	chr3:10327432-10369126	26.6761	21.3871	-0.318809	-0.643026	0.3734	0.69213	25.7614	12.5748	-1.03468	-1.77764	0.017	0.0959052	20.7572	17.4262	-0.252351	-0.417587	0.5755	0.811125	12.0861	17.0283	0.494579	0.702437	0.3335	0.729707
Aste1	NM_001040156	chr8:113787127-113947517	1.02808	0.145869	-2.81721	-1.07563	0.2542	0.59879	0.991685	0.265084	-1.90343	-0.738402	0.25595	0.497513	0.141345	0.482688	1.77187	0	1	1	0.254925	0.471414	0.886923	0	1	1
Astl	NM_001106504	chr3:119783716-119799450	0	0	0	0	1	1	0	0	0	0	1	1	0	0	0	0	1	1	0	0	0	0	1	1
Astn1	NM_001170603	chr13:76055254-76370674	13.2335	14.9284	0.17386	0.568442	0.41215	0.71928	12.7717	12.3875	-0.0440648	-0.136938	0.84105	0.914337	14.4782	11.6973	-0.307708	-0.890645	0.20585	0.569595	11.9167	11.4218	-0.0611965	-0.168817	0.81185	0.938516
Astn2	NM_001271363	chr5:81179613-82168427	1.64262	1.31494	-0.321006	-0.197402	0.7848	0.913212	1.58522	0.746462	-1.08654	-0.524299	0.4857	0.690835	1.27542	0.626754	-1.025	-0.498595	0.54055	0.79441	0.718389	0.611763	-0.231792	-0.0859595	0.91115	0.975159
Asun	NM_001109608	chr4:180855799-180887050	4.88453	3.57329	-0.450967	-0.577185	0.41335	0.719957	4.71242	2.22485	-1.08276	-1.20884	0.0864	0.278031	3.46524	3.09797	-0.161631	-0.170009	0.803	0.922608	2.14223	3.02497	0.497804	0.456843	0.48935	0.804906
Asz1	NM_130750	chr4:45358573-45414177	0	0	0	0	1	1	0	0	0	0	1	1	0	0	0	0	1	1	0	0	0	0	1	1
Atad1	NM_001035002	chr1:251235976-251379138	15.9928	19.045	0.251988	0.647232	0.3554	0.678549	15.4097	19.1377	0.312581	0.797247	0.27735	0.51339	18.4668	17.3145	-0.0929561	-0.211473	0.7612	0.902682	18.4275	16.911	-0.123903	-0.287496	0.68475	0.889124
Atad2	NM_001134879	chr7:97984753-98027379	1.71158	0.890719	-0.942283	-1.09578	0.1187	0.424764	1.6518	2.12922	0.366287	0.517793	0.46105	0.67225	0.863408	2.49277	1.52963	1.62434	0.0276	0.218385	2.049	2.43184	0.247126	0.348709	0.61855	0.86205
Atad2b	NM_001025151	chr6:28998079-29066848	2.1635	1.52967	-0.500144	-0.469406	0.50225	0.773935	2.08838	1.03302	-1.01552	-0.78766	0.2609	0.501234	1.48451	2.21189	0.575296	0.463984	0.5114	0.779157	0.993098	2.16054	1.12139	0.686985	0.29405	0.707158
Atad3a	NM_001034922	chr5:173189589-173209768	14.9858	13.4735	-0.153471	-0.290109	0.6807	0.865243	14.4687	16.5281	0.191983	0.36394	0.60465	0.772844	13.078	24.797	0.92302	1.68482	0.0224	0.191674	15.8883	24.2103	0.607654	1.15058	0.12035	0.551274
Atat1	NM_212498	chr20:3351302-3364559	18.8342	21.4985	0.190877	0.356669	0.62465	0.838939	18.185	8.53098	-1.09197	-1.65008	0.049	0.196184	20.8782	10.5628	-0.983011	-1.39823	0.0547	0.318983	8.1922	10.3126	0.332081	0.398503	0.60665	0.857136
Atcay	NM_001040190	chr7:11356016-11379782	70.7978	67.0689	-0.0780603	-0.292247	0.68465	0.86706	68.3479	64.7171	-0.0787501	-0.297471	0.68745	0.826852	65.1074	76.4148	0.231032	0.809258	0.26955	0.622873	62.1907	74.6158	0.262783	0.935974	0.22195	0.669904
Ate1	NM_001106300	chr1:200810755-201082100	18.7887	18.5647	-0.0172986	-0.0582644	0.93145	0.975706	18.1245	15.7856	-0.19934	-0.642646	0.36155	0.590478	18.0123	16.1186	-0.160256	-0.472067	0.5015	0.773984	15.181	15.7337	0.0515923	0.146784	0.83545	0.947299
Atf1	NM_001100895	chr7:141882260-141924790	5.81304	7.79679	0.423588	0.709659	0.3262	0.655426	5.60771	4.71088	-0.251414	-0.363212	0.59365	0.766911	7.55966	3.5041	-1.10928	-1.42833	0.04615	0.28938	4.52651	3.42059	-0.404152	-0.463041	0.46575	0.794161
Atf2	NM_031018	chr3:60721136-60795951	4.70026	9.01112	0.938965	1.19122	0.09695	0.384578	4.53546	10.1768	1.16596	1.4858	0.0325	0.14819	8.74254	8.748	0.000900751	0.0012114	0.9984	0.999057	9.7822	8.53531	-0.196715	-0.268591	0.6998	0.89484
Atf3	NM_012912	chr13:109817892-109849632	0.292662	0.0465441	-2.65257	0	1	1	0.282007	2.35889	3.0643	1.3943	0.2615	0.501565	0.0450345	0.166398	1.88554	0	1	1	2.26518	0.162475	-3.80134	-1.74965	0.25785	0.680036
Atf4	NM_024403	chr7:121480722-121482781	144.437	167.071	0.210019	0.81323	0.26485	0.606063	139.405	228.829	0.71499	2.85771	0.0001	0.00170145	162.133	182.829	0.173312	0.63445	0.3818	0.706815	219.994	178.532	-0.301284	-1.14945	0.11305	0.541438
Atf5	NM_172336	chr1:100808246-100810522	2.37535	3.46619	0.54521	0.543024	0.55635	0.805468	2.2931	4.14902	0.855471	0.809688	0.37065	0.59751	3.3709	5.0323	0.578081	0.553485	0.5592	0.803438	3.98535	4.91302	0.301903	0.277117	0.7487	0.915235
Atf6	NM_001107196	chr13:89057466-89242460	5.33562	4.76578	-0.162944	-0.257824	0.70425	0.879598	5.1493	3.43736	-0.583076	-0.799302	0.2414	0.486159	4.62521	5.30051	0.19661	0.26923	0.70285	0.877093	3.30845	5.17124	0.644352	0.765582	0.2702	0.690943
Atf6b	NM_001002809	chr20:4302344-4517128	29.8787	29.084	-0.0388923	-0.0510186	0.9494	0.981931	28.8531	40.3183	0.48271	0.78531	0.34775	0.578006	28.2375	40.1749	0.508681	0.679737	0.3919	0.71376	38.7289	39.2417	0.0189802	0.0337225	0.9691	0.991225
Atf7	NM_001108115	chr7:144136309-144223429	0.853878	1.256	0.556738	0.347575	0.6298	0.84236	0.824724	0.0450736	-4.19356	-1.57671	0.2549	0.49646	1.21772	0.902738	-0.431799	-0.225883	0.7545	0.899618	0.0433936	0.880907	4.34344	1.60225	0.2548	0.680036
Atf7ip2	NM_001017471	chr10:5476239-5519816	0	0	0	0	1	1	0	0	0	0	1	1	0	0.0124187	inf	0	1	1	0	0.0120929	inf	0	1	1
Atg10	NM_001109505	chr2:19853545-20152884	6.02564	3.57547	-0.752982	-0.841867	0.23765	0.5849	5.80819	3.39948	-0.772774	-0.865471	0.2355	0.480886	3.46364	4.58343	0.404141	0.382025	0.5911	0.820031	3.2706	4.47292	0.451663	0.433969	0.54035	0.825804
Atg101	NM_001007659	chr7:142929416-142938559	14.1457	13.4047	-0.0776209	-0.0789495	0.91645	0.970017	13.6545	0.203505	-6.06816	-1.07683	0.20615	0.455036	13.0214	14.0762	0.112376	0.0981686	0.902	0.961699	0.196242	13.7522	6.13089	0.978535	0.18725	0.639299
Atg101	NM_001271114	chr7:142929416-142938559	160.461	153.196	-0.0668492	-0.230715	0.74475	0.899753	154.884	152.368	-0.0236294	-0.0838823	0.91145	0.949357	148.687	200.643	0.432354	1.40667	0.0534	0.315025	146.438	195.918	0.419964	1.41765	0.05705	0.41762
Atg12	NM_001038495	chr18:40721798-40732126	13.8636	20.5489	0.567753	1.44425	0.0396	0.231104	13.3667	23.6927	0.825802	2.07806	0.00465	0.0373882	19.9347	20.1174	0.0131591	0.0323108	0.9615	0.987667	22.7958	19.6238	-0.216166	-0.542133	0.44795	0.784273
Atg13	NM_001271212	chr3:80580548-80614554	6.635	5.65207	-0.231317	-0.361494	0.62155	0.83764	6.40157	4.7046	-0.444352	-0.638713	0.37585	0.601748	5.48997	3.69767	-0.570182	-0.698156	0.36765	0.694172	4.52055	3.61329	-0.323187	-0.369389	0.6159	0.861262
Atg14	NM_001107258	chr15:24343417-24374776	9.08627	7.56907	-0.263573	-0.523198	0.44575	0.740824	8.76604	10.9626	0.322587	0.667497	0.3373	0.5687	7.34176	11.705	0.672927	1.2157	0.0893	0.407954	10.5383	11.4256	0.116626	0.229814	0.75105	0.916023
Atg16l1	NM_001108809	chr9:94880052-94915227	20.7177	15.6543	-0.404311	-0.989748	0.15645	0.484167	20.0024	16.1895	-0.30511	-0.741918	0.3115	0.544382	15.176	17.0862	0.171039	0.357061	0.6022	0.824555	15.5468	16.6716	0.100779	0.211278	0.76725	0.922407
Atg16l2	NM_001191560	chr1:166401270-166413564	1.04507	1.76965	0.759866	0.441887	0.5971	0.825047	1.00914	2.79775	1.47114	1.00948	0.21125	0.459397	1.72103	0.736409	-1.22469	-0.750288	0.4345	0.737423	2.68598	0.720184	-1.89901	-1.23173	0.3029	0.712496
Atg2a	NM_001109545	chr1:221612583-221632267	11.4506	6.81043	-0.749605	-2.02458	0.0089	0.0948199	11.058	5.66711	-0.96441	-2.43596	0.0027	0.024632	6.61365	9.79904	0.567195	1.34065	0.09715	0.424109	5.44707	9.57248	0.813412	1.81997	0.022	0.283039
Atg3	NM_134394	chr11:60585191-60613706	49.3109	43.1268	-0.193323	-0.496615	0.47925	0.760481	47.6066	42.559	-0.161696	-0.403842	0.56105	0.744243	41.8486	37.2855	-0.166564	-0.361958	0.61135	0.830152	40.9167	36.3871	-0.169262	-0.360693	0.6073	0.857496
Atg4al1	NM_001126298	chrX:112328906-112403157	7.21729	3.55005	-1.02362	-1.31909	0.06595	0.307977	6.96433	2.63598	-1.40164	-1.61236	0.0477	0.192624	3.43965	2.46562	-0.480311	-0.432466	0.4945	0.770291	2.54044	2.40673	-0.0780024	-0.0585023	0.9393	0.983298
Atg4b	NM_001025711	chr9:100910967-100920118	30.2208	27.2945	-0.14693	-0.43937	0.54735	0.800563	29.1677	22.875	-0.3506	-0.974152	0.1807	0.423331	26.4956	24.8321	-0.093548	-0.237349	0.73895	0.893929	21.9864	24.2403	0.140798	0.335572	0.6431	0.870495
Atg4c	NM_001107948	chr5:117862745-117931520	5.23972	2.12555	-1.30166	-1.32117	0.06365	0.302674	5.05784	1.44638	-1.80607	-1.58614	0.03795	0.16557	2.06483	2.5767	0.319506	0.247513	0.7159	0.882989	1.38923	2.51758	0.857751	0.493577	0.41705	0.771251
Atg4d	NM_001101013	chr8:22291444-22301331	38.9566	34.2596	-0.185361	-0.510553	0.4838	0.762961	37.5945	26.6617	-0.495756	-1.27806	0.08465	0.274966	33.2566	47.3435	0.509523	1.31766	0.08555	0.401679	25.629	46.2534	0.851783	2.07292	0.00865	0.178973
Atg5	NM_001014250	chr20:49301782-49393144	9.23265	10.1731	0.139942	0.252371	0.7164	0.885414	8.90629	11.8357	0.410243	0.735615	0.2914	0.524663	9.86876	9.70327	-0.0243981	-0.0391243	0.95425	0.984762	11.3729	9.4701	-0.264146	-0.43137	0.535	0.823175
Atg7	NM_001012097	chr4:146598415-146776407	5.51553	3.01826	-0.869782	-0.984762	0.159	0.4878	5.32244	0.555306	-3.26073	-2.36515	0.0085	0.0577655	2.92811	1.47681	-0.987484	-0.561912	0.35835	0.687339	0.533458	1.43944	1.43206	0.726862	0.262	0.683422
Atg9a	NM_001014218	chr9:82382799-82393382	30.4	31.7587	0.0630835	0.230594	0.75885	0.904896	29.3508	30.4182	0.0515383	0.187774	0.8099	0.897397	30.8358	39.8976	0.371695	1.28117	0.09625	0.423889	29.232	38.9693	0.414791	1.44893	0.0679	0.450193
Atg9b	NM_001191968	chr4:7314368-7321029	0	0.0847557	inf	0	1	1	0	0	0	0	1	1	0.0824583	0	#NAME?	0	1	1	0	0	0	0	1	1
Atic	NM_031014	chr9:78862012-78882061	6.94837	4.86451	-0.514381	-0.739712	0.30215	0.6372	6.69883	3.29991	-1.02148	-1.26784	0.0687	0.24149	4.72353	3.83019	-0.30245	-0.318294	0.6615	0.857212	3.17657	3.73492	0.233605	0.2135	0.7632	0.921671
Atl1	NM_001009831	chr6:92229784-92370426	124.394	73.3958	-0.761144	-2.95885	5e-05	0.0023396	119.95	92.459	-0.375553	-1.55039	0.0283	0.135357	71.161	119.455	0.747306	2.69599	5e-05	0.0020606	88.9481	116.575	0.390227	1.5055	0.03645	0.354866
Atl2	NM_001100671	chr6:2569014-2610430	1.90131	1.95931	0.0433542	0.0438334	0.95265	0.982422	1.83403	1.18507	-0.630048	-0.536552	0.3823	0.607195	1.89762	1.76768	-0.102338	-0.0943337	0.89715	0.959747	1.13768	1.72367	0.59939	0.424102	0.5456	0.827843
Atl3	NM_001044241	chr1:222746022-222786942	0.750589	0.217261	-1.7886	-0.731862	0.36975	0.690456	0.722535	0.623566	-0.212526	-0.102587	0.2497	0.492966	0.211194	0.620679	1.55528	0.569894	0.5593	0.803438	0.601238	0.607201	0.0142374	0.00589655	0.6934	0.89318
Atm	NM_001106821	chr8:58018289-58119623	0.569036	0.311768	-0.868046	0	1	1	0.549343	0.319975	-0.77975	0	1	1	0.302625	1.06398	1.81387	1.15397	0.12695	0.470443	0.307257	1.03678	1.75459	1.07038	0.12945	0.55929
Atmin	NM_001191786	chr19:49482481-49499682	3.69724	4.34709	0.233602	0.439263	0.5449	0.799251	3.56788	4.40411	0.303783	0.551217	0.4423	0.656755	4.21865	3.97374	-0.0862823	-0.146515	0.83905	0.93824	4.23254	3.88094	-0.12512	-0.209457	0.7746	0.925519
Atn1	NM_017228	chr4:157267393-157281199	0.0775958	0.106701	0.459527	0	1	1	0.0749721	0.0946167	0.335741	0	1	1	0.103709	0.0696723	-0.57388	0	1	1	0.0908515	0.0680766	-0.416351	0	1	1
Atn1	NM_017228_1	chr9:20264457-20278263	0.0453004	0.0374192	-0.275745	0	1	1	0.0438122	0.0426197	-0.0398136	0	1	1	0.0363462	0.102853	1.50071	0	1	1	0.0409528	0.100503	1.29521	0	1	1
Atoh1	NM_001109238	chr4:95498002-95500098	0	0	0	0	1	1	0	0	0	0	1	1	0	0	0	0	1	1	0	0	0	0	1	1
Atoh7	NM_001170482	chr20:27082960-27083410	0	1.07596	inf	#NAME?	0.1241	0.432038	0	4.84681	inf	#NAME?	5e-05	0.000964063	1.04397	10.9831	3.39514	1.60262	0.263	0.618795	4.65781	10.7363	1.20477	0.837321	0.2989	0.710018
Atoh8	NM_001109241	chr4:100067340-100099517	0.92627	0.562852	-0.718677	-0.396769	0.59605	0.824737	0.894778	0.109863	-3.02583	-1.01975	0.28325	0.517379	0.547535	2.62009	2.25859	1.36518	0.3045	0.645706	0.10594	2.56189	4.59589	1.49502	0.2226	0.670053
Atox1	NM_053359	chr10:40790849-40805886	473.026	576.203	0.284657	1.07088	0.14905	0.472389	456.9	1152.33	1.3346	5.52734	5e-05	0.000964063	559.452	870.701	0.638161	2.36722	0.00165	0.0343029	1106.89	850.236	-0.380573	-1.64493	0.0416	0.37327
Atp10a	NM_001141935	chr1:115973342-116141892	0.510457	0.0551652	-3.20996	0	1	1	0.491812	0	#NAME?	0	1	1	0.0534492	0.215767	2.01324	0	1	1	0	0.211037	inf	0	1	1
Atp11a	NM_001107324	chr16:81990339-82100222	7.56337	4.60737	-0.715085	-1.76914	0.0164	0.138718	7.30011	5.08607	-0.521366	-1.30042	0.07845	0.262613	4.4709	5.09761	0.189257	0.389945	0.5897	0.819436	4.88501	4.97822	0.0272675	0.0569005	0.94295	0.98396
Atp12a	NM_001301664	chr15:36565494-36590171	0	0	0	0	1	1	0	0	0	0	1	1	0	0	0	0	1	1	0	0	0	0	1	1
Atp12a	NM_133517	chr15:36565494-36590171	0	0	0	0	1	1	0	0	0	0	1	1	0	0	0	0	1	1	0	0	0	0	1	1
Atp13a1	NM_001106079	chr16:21364086-21380142	4.30625	7.2074	0.743047	1.31065	0.0822	0.349283	4.15853	4.04109	-0.04133	-0.0620702	0.9332	0.961665	7.00067	4.98796	-0.489044	-0.789192	0.29445	0.638884	3.88308	4.8708	0.326957	0.462994	0.53885	0.825333
Atp13a2	NM_001173432	chr5:159512284-159531631	79.8849	56.4198	-0.50172	-2.11738	0.0074	0.0841256	77.1408	51.461	-0.584013	-2.61938	0.00255	0.0235754	54.8006	68.0702	0.312833	1.22664	0.13605	0.483029	49.4332	66.4966	0.427802	1.77771	0.04675	0.389
Atp13a3	NM_001109369	chr11:73936749-73963852	1.26312	1.60581	0.346311	0.176866	0.77105	0.908241	1.21793	1.11046	-0.133268	-0.0654001	0.91165	0.949357	1.55588	1.93504	0.314632	0.151504	0.7819	0.912229	1.06895	1.89185	0.823603	0.381394	0.23885	0.678537
Atp13a4	NM_001191658	chr11:74834256-74968160	1.50362	2.27253	0.595863	0.585878	0.4153	0.720631	1.44766	0.839353	-0.786376	-0.624385	0.3501	0.58043	2.20753	2.13608	-0.0474654	-0.0473134	0.94045	0.97959	0.807395	2.08959	1.37187	0.854382	0.22335	0.67063
Atp13a5	NM_001191657	chr11:74984612-75124249	0.250002	0.0285739	-3.12917	0	1	1	0.241291	0.0669304	-1.85004	0	1	1	0.0277868	0.238147	3.09938	0	1	1	0.0645415	0.232176	1.84692	0	1	1
Atp1a1	NM_012504	chr2:203666705-204041694	101.83	125.105	0.296975	1.18056	0.0952	0.380545	98.3009	275.518	1.48687	6.47416	5e-05	0.000964063	121.398	219.095	0.851818	3.35322	5e-05	0.0020606	264.825	213.922	-0.30795	-1.37044	0.0553	0.412912
Atp1a2	NM_012505	chr13:90651681-90676629	82.301	104.431	0.343565	1.44091	0.04255	0.239648	79.4525	99.6712	0.327084	1.47315	0.0441	0.182487	101.315	92.2559	-0.135131	-0.538673	0.44365	0.742427	95.7895	90.0757	-0.0887288	-0.379717	0.5992	0.853806
Atp1a3	NM_012506	chr1:81852428-81881549	331.47	400.912	0.274408	1.24698	0.0904	0.370089	320.007	343.858	0.10371	0.539089	0.47935	0.686443	389.24	272.818	-0.512722	-2.25089	0.0035	0.059246	330.388	266.39	-0.310622	-1.53652	0.04945	0.398009
Atp1a4	NM_001271030	chr13:90605793-90641772	0.00452806	0.00448627	-0.0133764	0	1	1	0.00437894	0	#NAME?	0	1	1	0.00434045	0	#NAME?	0	1	1	0	0	0	0	1	1
Atp1a4	NM_022848	chr13:90605793-90641772	0.00450978	0.00443088	-0.0254641	0	1	1	0.00436132	0	#NAME?	0	1	1	0.00428685	0	#NAME?	0	1	1	0	0	0	0	1	1
Atp1b1	NM_013113	chr13:82607843-82757681	478.629	774.216	0.693828	3.00232	5e-05	0.0023396	461.566	794.536	0.783578	3.82382	5e-05	0.000964063	751.189	503.424	-0.577402	-2.39115	0.0009	0.0212484	764.201	491.378	-0.637119	-2.95527	5e-05	0.00359193
Atp1b2	NM_012507	chr10:56205621-56211857	31.6572	56.2414	0.829098	3.16479	0.00015	0.00511574	30.5504	40.2298	0.397071	1.45836	0.05905	0.221589	54.62	34.256	-0.673072	-2.35573	0.003	0.0527738	38.6567	33.4478	-0.208809	-0.70266	0.37165	0.749361
Atp1b3	NM_012913	chr8:104190031-104221342	46.5851	67.0972	0.526383	1.74667	0.0138	0.125303	44.9459	69.2901	0.624462	2.03719	0.00395	0.0330756	65.0749	61.7127	-0.0765342	-0.24064	0.7318	0.890692	66.6273	60.2227	-0.145806	-0.457677	0.51545	0.814676
Atp1b4	NM_053381	chrX:124631845-124652520	0	0	0	0	1	1	0	0	0	0	1	1	0	0	0	0	1	1	0	0	0	0	1	1
Atp2a1	NM_058213	chr1:197839582-197875038	0.0271824	0.038712	0.510109	0	1	1	0.0261966	0.0127618	-1.03754	0	1	1	0.037654	0.00732202	-2.36249	0	1	1	0.0123064	0.00713021	-0.787392	0	1	1
Atp2a2	NM_001110139	chr12:39553902-39603326	8.27771	6.9008	-0.262469	-0.120715	0.8588	0.944331	8.01172	24.1143	1.5897	0.829367	0.415	0.635954	6.72031	25.7705	1.93912	0.90993	0.4161	0.726713	23.1359	25.2057	0.123616	0.0666249	0.9026	0.971837
Atp2a2	NM_001110823	chr12:39553902-39603326	0	0	0	0	1	1	0	0	0	0	1	1	0	0	0	0	1	1	0	0	0	0	1	1
Atp2a2	NR_027839	chr12:39553902-39603326	92.9115	86.8484	-0.097359	-0.371685	0.5992	0.825579	89.6106	90.0452	0.00698006	0.0229348	0.9731	0.983384	84.2348	104.778	0.314851	0.921721	0.1855	0.548188	86.6115	102.226	0.23913	0.644728	0.3663	0.746937
Atp2a3	NM_012914	chr10:59529784-59560430	0.84454	0.633474	-0.414881	-0.325168	0.6657	0.859638	0.815763	0.219561	-1.89353	-1.00954	0.32195	0.553567	0.614918	1.01652	0.72517	0.458394	0.5274	0.78549	0.21062	0.992135	2.23589	1.09316	0.2977	0.708623
Atp2b1	NM_053311	chr7:41114696-41220579	110.713	115.283	0.0583657	0.243673	0.72505	0.890516	106.787	114.717	0.103346	0.452908	0.51375	0.709623	111.832	106.937	-0.0645739	-0.252908	0.7237	0.887037	110.332	104.331	-0.0806864	-0.330966	0.64545	0.872042
Atp2b2	NM_012508	chr4:145704778-146016319	48.6458	47.3652	-0.0384868	-0.15676	0.82895	0.933053	46.9238	72.0128	0.617934	2.66871	0.00045	0.00602209	45.9606	82.6296	0.846262	3.31384	5e-05	0.0020606	69.2512	80.6506	0.219847	0.931653	0.1878	0.639604
Atp2b3	NM_133288	chrX:157239305-157312028	26.7468	20.6079	-0.376173	-1.21474	0.0814	0.34816	25.8259	21.2784	-0.279427	-0.908841	0.21265	0.460624	19.9913	25.0437	0.325074	0.944958	0.18295	0.545186	20.4474	24.4519	0.258033	0.762541	0.3015	0.711926
Atp2b4	NM_001005871	chr13:50103021-50149987	36.3089	40.6706	0.163663	0.555766	0.4368	0.735502	35.0455	30.4735	-0.201673	-0.642047	0.3627	0.591448	39.4512	31.9383	-0.304781	-0.926611	0.1906	0.55284	29.2917	31.1765	0.0899633	0.257381	0.71305	0.900441
Atp2c1	NM_131907	chr8:113953958-114039965	23.4644	26.9861	0.201741	0.715684	0.3141	0.645641	22.6223	26.4709	0.226661	0.797541	0.25525	0.496759	26.1714	22.3813	-0.225696	-0.73097	0.2973	0.641045	25.4544	21.842	-0.220811	-0.71494	0.31425	0.718532
Atp2c2	NM_134462	chr19:52347479-52404607	0	0.148272	inf	0	1	1	0	0	0	0	1	1	0.143466	0	#NAME?	0	1	1	0	0	0	0	1	1
Atp4a	NM_012509	chr1:89162699-89175504	0	0	0	0	1	1	0	0	0	0	1	1	0	0	0	0	1	1	0	0	0	0	1	1
Atp4b	NM_012510	chr16:81136217-81145131	0	0	0	0	1	1	0	0	0	0	1	1	0	0	0	0	1	1	0	0	0	0	1	1
Atp5a1	NM_023093	chr18:74156552-74164490	606.08	466.155	-0.378698	-1.62618	0.02215	0.163683	584.854	391.401	-0.579429	-2.67748	0.0001	0.00170145	452.271	448.635	-0.011645	-0.0471744	0.9458	0.981743	376.273	437.915	0.218873	0.94051	0.18385	0.638298
Atp5b	NM_134364	chr7:2504707-2511748	1702.06	1395.96	-0.28602	-1.23154	0.0781	0.340266	1642.45	1248.59	-0.395545	-1.94996	0.0059	0.0446807	1353.97	1472.17	0.120755	0.498999	0.47505	0.76046	1200.64	1436.8	0.259051	1.20746	0.0865	0.496259
Atp5c1	NM_053825	chr17:72209374-72231552	714.44	739.794	0.0503101	0.215173	0.7602	0.905381	689.278	621.306	-0.149781	-0.671586	0.33745	0.568789	717.451	637.397	-0.170688	-0.681659	0.32665	0.662214	597.522	622.057	0.0580566	0.241976	0.7269	0.90645
Atp5d	NM_139106	chr7:12426810-12429897	823.055	1105.92	0.426181	1.89332	0.00955	0.0994799	794.826	1359.44	0.774303	3.85772	5e-05	0.000964063	1073.67	1051.11	-0.0306344	-0.130325	0.85765	0.945396	1306.2	1026.32	-0.347903	-1.67384	0.03495	0.349077
Atp5e	NM_139099	chr3:172563104-172566007	1851.42	2962.91	0.678384	2.81463	0.00015	0.00511574	1787.42	3921.57	1.13356	5.08275	5e-05	0.000964063	2874.68	2904.28	0.0147755	0.0596089	0.93235	0.975999	3768.93	2835.39	-0.410608	-1.82456	0.01185	0.21516
Atp5f1	NM_134365	chr2:208408889-208420164	3.44151	2.09925	-0.713164	-0.491943	0.46255	0.750785	3.31845	2.9884	-0.151139	-0.113799	0.87595	0.932676	2.03648	2.09247	0.0391302	0.0211608	0.97695	0.992178	2.87286	2.04219	-0.49237	-0.256423	0.72335	0.905388
Atp5f1	NM_134365_1	chr2:208566384-208577147	2.91568	1.86147	-0.647387	-0.376693	0.5839	0.818411	2.81159	2.63807	-0.0919013	-0.0658246	0.91795	0.952987	1.80575	1.94307	0.10574	0.0598492	0.93675	0.978372	2.53615	1.89643	-0.419351	-0.229542	0.7456	0.91439
Atp5g1	NM_017311	chr10:83895946-83898527	950.083	1505.13	0.663761	2.89507	0.00015	0.00511574	917.177	1443.95	0.65475	3.04235	0.0001	0.00170145	1461	1006.25	-0.53797	-2.20828	0.0029	0.0514023	1387.78	982.418	-0.498371	-2.17568	0.00385	0.109678
Atp5g2	NM_133556	chr7:144264206-144272578	443.242	550.587	0.312875	1.22714	0.0922	0.373979	427.7	515.131	0.268339	1.0653	0.14465	0.374086	534.428	446.642	-0.258878	-0.946634	0.2007	0.565402	495.186	436.105	-0.183295	-0.677639	0.36265	0.74554
Atp5g3	NM_053756	chr3:60811222-60813679	1305.49	2459.49	0.913769	3.97345	5e-05	0.0023396	1259.85	2417.7	0.940379	4.48221	5e-05	0.000964063	2386.6	1807.63	-0.400855	-1.66646	0.0206	0.183123	2324.46	1764.44	-0.39769	-1.82079	0.01105	0.206136
Atp5h	NM_019383	chr10:103967349-103972513	1525.98	2382.37	0.642664	2.75282	0.0001	0.00395203	1472.45	2902.62	0.979138	4.55574	5e-05	0.000964063	2310.84	2108.52	-0.132182	-0.541788	0.4377	0.738555	2790.87	2057.85	-0.43958	-1.97162	0.0053	0.132971
Atp5i	NM_080481	chr14:2325307-2326436	3098.75	4952.61	0.676503	2.82802	5e-05	0.0023396	2990.51	6905.69	1.20739	5.44538	5e-05	0.000964063	4805.56	5170.12	0.105493	0.429646	0.55235	0.799922	6637.1	5048.23	-0.394774	-1.76838	0.01665	0.250747
Atp5j	NM_053602	chr11:24286808-24293863	1527.9	2586.55	0.75948	3.2571	5e-05	0.0023396	1473.95	2945.61	0.998884	4.63945	5e-05	0.000964063	2509.28	2087.42	-0.265549	-1.08934	0.1281	0.472074	2831.97	2037.47	-0.47503	-2.12646	0.00285	0.0918192
Atp5j2	NM_001271117	chr12:10716426-11677818	2271.64	3603.34	0.665602	1.74883	0.0158	0.136003	2191.83	4707.68	1.10288	3.31266	5e-05	0.000964063	3493.69	3175.19	-0.137908	-0.356349	0.6146	0.832336	4528.12	3098.59	-0.5473	-1.62848	0.02155	0.280074
Atp5l	NM_212516	chr8:49220440-49227273	2258.61	4044.18	0.840413	3.61897	5e-05	0.0023396	2178.81	5126.02	1.2343	5.84904	5e-05	0.000964063	3922.45	3665.66	-0.0976827	-0.404668	0.5627	0.805319	4931.12	3577.44	-0.462989	-2.13194	0.0027	0.0892234
Atp5o	NM_138883	chr11:32081605-32087918	1068.86	1745.72	0.707749	3.11086	5e-05	0.0023396	1032.1	1950.15	0.917997	4.39817	5e-05	0.000964063	1694.33	1435.09	-0.239571	-1.01108	0.1593	0.518807	1874.25	1401.12	-0.419732	-1.94257	0.00775	0.166448
Atp5s	NM_001007749	chr6:92057806-92076022	6.95223	11.6108	0.739915	1.33563	0.0652	0.306153	6.69769	6.94731	0.0527902	0.0834819	0.9043	0.946021	11.2751	4.55106	-1.30887	-1.87333	0.01285	0.13864	6.68083	4.443	-0.588492	-0.728236	0.3037	0.713362
Atp5sl	NM_001009705	chr1:82413222-82419152	50.3222	38.6176	-0.381936	-1.18325	0.1064	0.403909	48.606	38.0311	-0.353955	-1.06284	0.14675	0.37682	37.4722	42.2985	0.174785	0.46687	0.5187	0.782474	36.5682	41.3029	0.175654	0.456353	0.5182	0.815775
Atp6ap1	NM_031785	chrX:156407972-156415053	82.9625	95.416	0.201772	0.775787	0.2854	0.623689	80.0212	114.938	0.522396	2.03883	0.00455	0.0367606	92.587	76.2711	-0.279673	-0.972329	0.1682	0.527485	110.532	74.4459	-0.570204	-2.01835	0.005	0.127942
Atp6ap1l	NM_001191843	chr2:19781389-19808937	19.9035	30.4949	0.615545	1.11947	0.12315	0.431504	19.1909	4.36444	-2.13655	-1.95607	0.02575	0.12737	29.5704	5.14139	-2.52393	-2.38553	0.0095	0.114698	4.1976	5.02808	0.260443	0.190423	0.7777	0.926734
Atp6ap2	NM_001007091	chrX:11137888-11164854	57.8494	45.0458	-0.360908	-0.944523	0.1844	0.526381	55.8243	38.5883	-0.532729	-1.30116	0.0675	0.239136	43.6909	46.939	0.103452	0.231367	0.73835	0.893574	37.1168	45.8108	0.303615	0.640215	0.3669	0.747633
Atp6v0a1	NM_031604	chr10:88914275-88967734	141.07	98.4806	-0.518499	-2.22451	0.0024	0.0403379	136.147	91.1376	-0.579047	-2.60503	0.0005	0.00657119	95.5876	127.099	0.411061	1.66606	0.024	0.20008	87.6017	124.106	0.502546	2.12076	0.004	0.112291
Atp6v0a2	NM_053775	chr12:37368320-37398233	1.90218	0.699083	-1.44412	-0.935503	0.2281	0.577557	1.83711	0.523542	-1.81106	-0.959453	0.10015	0.30361	0.679016	1.48865	1.13249	0.588854	0.4011	0.718529	0.504706	1.45357	1.52608	0.663334	0.3604	0.744222
Atp6v0a4	NM_001106591	chr4:65736584-65818521	0.829485	0.061428	-3.75525	-1.4023	0.2566	0.600699	0.801432	0	#NAME?	#NAME?	5e-05	0.000964063	0.0594789	0.387819	2.70494	0	1	1	0	0.37769	inf	0	1	1
Atp6v0b	NM_001106681	chr5:136718351-136719868	454.535	735.623	0.694573	2.86041	0.00015	0.00511574	438.519	652.44	0.573208	2.3843	0.00065	0.00816715	714.049	558.073	-0.355569	-1.37768	0.05675	0.326208	627.348	544.787	-0.203575	-0.801209	0.26715	0.688882
Atp6v0c	NM_130823	chr10:13537032-13542077	1619.86	2241.52	0.468608	2.16527	0.00385	0.0543273	1563.5	1941.15	0.312131	1.69228	0.0294	0.138527	2176.43	1505.71	-0.531523	-2.36236	0.0023	0.0430576	1865.44	1470.35	-0.343358	-1.76325	0.02025	0.270452
Atp6v0d1	NM_001011927	chr19:37481784-37525762	406.635	267.798	-0.602589	-2.52171	0.0004	0.0106345	392.419	233.145	-0.751166	-3.31313	5e-05	0.000964063	259.8	299.759	0.206401	0.79679	0.2551	0.612757	224.101	292.573	0.384647	1.54362	0.0312	0.336937
Atp6v0d2	NM_001011972	chr5:33843590-33892446	0	0	0	0	1	1	0	0	0	0	1	1	0	0.671773	inf	#NAME?	0.1216	0.465601	0	0.657172	inf	#NAME?	0.11505	0.544241
Atp6v0e1	NM_053578	chr10:16769856-16792930	100.662	131.996	0.390977	1.1825	0.09905	0.388952	97.1036	94.9497	-0.0323619	-0.0891137	0.89995	0.943922	128.122	100.103	-0.356035	-0.96742	0.17485	0.536934	91.3335	97.742	0.0978344	0.243286	0.7236	0.905388
Atp6v0e2	NM_001002253	chr4:78168116-78171265	95.739	106.006	0.146972	0.449254	0.54225	0.79739	92.4214	33.6722	-1.45667	-3.48298	0.0002	0.00305684	102.905	50.3181	-1.03216	-2.45704	0.00155	0.0326311	32.347	49.1452	0.603421	1.13756	0.164	0.611879
Atp6v1a	NM_001108318	chr11:61531577-61584634	70.2891	43.6393	-0.687671	-2.68912	0.0002	0.00623893	67.7735	45.2563	-0.582605	-2.35297	0.00125	0.0135809	42.326	61.317	0.534746	1.93125	0.00645	0.0899837	43.5325	59.8466	0.459177	1.70353	0.01665	0.250747
Atp6v1b1	NM_001107867	chr4:115417099-115435754	0	0	0	0	1	1	0	0	0	0	1	1	0	0	0	0	1	1	0	0	0	0	1	1
Atp6v1b2	NM_057213	chr16:22326537-22350143	376.057	269.054	-0.483053	-2.0988	0.0026	0.0423604	362.858	260.895	-0.475935	-2.24988	0.00145	0.0152452	261.047	327.31	0.326347	1.34331	0.059	0.332906	250.864	319.533	0.349056	1.54688	0.0305	0.33469
Atp6v1c1	NM_001011992	chr7:77678967-77716408	103.279	101.893	-0.019482	-0.0741358	0.91685	0.970177	99.5584	92.6539	-0.103692	-0.396116	0.57395	0.752283	98.8216	87.3029	-0.178797	-0.6174	0.3761	0.70172	89.1182	85.2044	-0.0647922	-0.224114	0.75195	0.916251
Atp6v1c2	NM_001014199	chr6:42585975-42632289	2.07367	1.45472	-0.511443	-0.29124	0.65005	0.852307	1.99844	3.24722	0.70033	0.400298	0.49735	0.698256	1.40986	1.89693	0.428117	0.230506	0.74445	0.895739	3.12205	1.85115	-0.754075	-0.471418	0.4879	0.804771
Atp6v1d	NM_199386	chr6:102032270-102047754	345.99	511.185	0.563113	2.35721	0.0014	0.0274325	333.706	406.654	0.285227	1.23834	0.0821	0.270505	495.766	330.705	-0.584115	-2.29989	0.0013	0.0286614	391.086	322.716	-0.277221	-1.12968	0.10905	0.53694
Atp6v1e1	NM_198745	chr4:153351433-153373558	472.294	529.326	0.164473	0.696457	0.3224	0.652147	455.89	684.905	0.587217	2.6594	0.0002	0.00305684	513.505	512.739	-0.0021527	-0.0085864	0.9903	0.997398	658.425	500.443	-0.395813	-1.69599	0.01755	0.254047
Atp6v1e2	NM_001108979	chr6:10511451-10515370	0	0	0	0	1	1	0	0	0	0	1	1	0	0.0667069	inf	0	1	1	0	0.0649551	inf	0	1	1
Atp6v1f	NM_053884	chr4:56744562-56747657	662.529	942.772	0.508925	2.14532	0.00445	0.0598346	639.683	772.115	0.271459	1.18361	0.1095	0.320197	915.067	663.445	-0.463899	-1.83236	0.0123	0.134447	742.039	647.746	-0.196066	-0.798269	0.2885	0.70263
Atp6v1g1	NM_001106660	chr5:79367662-79373843	456.077	743.152	0.70438	2.99672	5e-05	0.0023396	439.944	867.913	0.980232	4.47673	5e-05	0.000964063	720.915	649.223	-0.151115	-0.617123	0.3777	0.703112	834.979	633.515	-0.398361	-1.76149	0.013	0.226443
Atp6v1g2	NM_212490	chr20:4638662-4943288	308.224	449.69	0.544951	2.03279	0.0057	0.0716204	297.473	376.207	0.338768	1.35836	0.061	0.225158	436.554	336.609	-0.375086	-1.32244	0.07215	0.368037	361.61	328.581	-0.138186	-0.515973	0.468	0.795226
Atp6v1g3	NM_001105991	chr13:55274198-55288651	0	0	0	0	1	1	0	0	0	0	1	1	0	0	0	0	1	1	0	0	0	0	1	1
Atp6v1h	NM_001013929	chr5:14262465-14367898	96.8962	80.7693	-0.262634	-0.896183	0.20395	0.551377	93.4525	81.6071	-0.195539	-0.66147	0.3625	0.591369	78.3326	86.7419	0.147116	0.446678	0.52585	0.784921	78.5131	84.6676	0.108877	0.329388	0.64955	0.87384
Atp7a	NM_052803	chrX:77119910-77190446	0.31072	0.259229	-0.26139	0	1	1	0.300523	0.297362	-0.0152522	0	1	1	0.250964	0.172978	-0.536897	0	1	1	0.286726	0.169224	-0.760734	0	1	1
Atp7b	NM_012511	chr16:74865515-74944935	0.00480971	0.186356	5.27597	0	1	1	0.00463347	0.0934027	4.3333	0	1	1	0.181207	0.0805055	-1.17048	0	1	1	0.0900379	0.0784679	-0.19843	0	1	1
Atp8b1	NM_001106140	chr18:60015246-60095334	0	0	0	0	1	1	0	0	0	0	1	1	0	0	0	0	1	1	0	0	0	0	1	1
Atp8b2	NM_001024798	chr2:189334340-189400323	18.406	21.1122	0.197898	0.608793	0.3891	0.70436	17.7635	23.4846	0.402795	1.21916	0.0891	0.283683	20.4892	23.6257	0.205494	0.59683	0.4058	0.721045	22.5664	23.0711	0.0319103	0.0931488	0.8992	0.970233
Atp9b	NM_001106130	chr18:77343550-77535564	4.4162	5.30686	0.265054	0.490743	0.47335	0.756145	4.26139	4.85045	0.186795	0.328419	0.6405	0.796751	5.14273	5.11553	-0.00765056	-0.0128703	0.9853	0.995299	4.66692	4.99101	0.0968596	0.155825	0.816	0.94027
Atpaf1	NM_001107959	chr5:134641617-134667079	9.40005	9.11573	-0.0443101	-0.096503	0.89355	0.961103	9.05988	11.1402	0.298213	0.634857	0.3618	0.590722	8.85222	8.0759	-0.132417	-0.247137	0.7331	0.890733	10.7099	7.88274	-0.442173	-0.824561	0.25065	0.680036
Atpaf2	NM_001107006	chr10:46768538-46783889	39.0686	23.4707	-0.735151	-1.64508	0.02425	0.173185	37.7231	33.2431	-0.182395	-0.429715	0.5596	0.743245	22.7735	37.7246	0.728149	1.43076	0.04985	0.303287	31.9455	36.8518	0.20612	0.434236	0.5535	0.832232
Atpif1	NM_012915	chr5:150719569-150723287	4594.97	7166.49	0.641209	2.77669	0.00025	0.0074038	4437.01	9592.18	1.11227	5.36937	5e-05	0.000964063	6951.12	7356.9	0.0818521	0.338845	0.6301	0.840579	9221.8	7180.9	-0.360883	-1.67818	0.017	0.251627
Atraid	NM_001127526	chr6:26680627-26685185	43.033	40.9087	-0.0730383	-0.150305	0.82895	0.933053	41.5283	23.043	-0.849769	-1.4537	0.03815	0.166196	39.6637	34.7538	-0.190645	-0.329745	0.63525	0.843552	22.1667	33.9266	0.614026	0.893625	0.19985	0.652525
Atrip	NM_001106859	chr8:117797953-117811989	5.98618	6.5283	0.125072	0.194946	0.7767	0.910157	5.78495	6.47718	0.16306	0.238517	0.74255	0.859972	6.32952	7.20624	0.187151	0.265917	0.6977	0.874913	6.22957	7.03969	0.176379	0.237833	0.74415	0.914162
Atrn	NM_031351	chr3:123434408-123567920	13.2215	11.7028	-0.176043	-0.600272	0.3977	0.710057	12.7551	11.9329	-0.0961294	-0.322454	0.6471	0.80122	11.3546	12.4467	0.132484	0.40745	0.56315	0.805558	11.473	12.1514	0.0828854	0.254101	0.71485	0.901694
Atxn1	NM_012726	chr17:19160993-19533814	4.78142	3.29474	-0.537276	-0.904689	0.2008	0.548054	4.61685	4.35956	-0.0827269	-0.147667	0.83535	0.912141	3.19607	3.48274	0.123924	0.168835	0.80565	0.923708	4.1912	3.39918	-0.302176	-0.433736	0.54925	0.829975
Atxn10	NM_133313	chr7:126228415-126351727	214.871	164.003	-0.389747	-1.53897	0.0291	0.191458	207.38	123.324	-0.749819	-2.94375	5e-05	0.000964063	159.07	153.682	-0.0497096	-0.177967	0.7995	0.92188	118.601	150.028	0.339117	1.19834	0.0881	0.499531
Atxn2l	NM_001130097	chr1:197908091-197919480	15.5315	14.3362	-0.115532	-0.368999	0.65595	0.854714	15.0064	16.2982	0.11914	0.394989	0.6498	0.802822	13.9235	11.9118	-0.225132	-0.589982	0.45615	0.750669	15.6547	11.6309	-0.428629	-1.15936	0.16355	0.610791
Atxn3	NM_021702	chr6:125819639-125853461	1.55048	1.23211	-0.331585	-0.313693	0.6532	0.853567	1.494	2.64513	0.824158	0.823359	0.24665	0.49018	1.19478	1.00505	-0.24947	-0.183035	0.79585	0.920377	2.54456	0.981687	-1.37408	-1.15523	0.08525	0.493537
Atxn7l3b	NM_001136261	chr7:55600878-55604403	93.2946	104.722	0.166702	0.702631	0.31955	0.649697	89.9544	126.135	0.487707	2.16348	0.00215	0.0207786	101.618	115.016	0.178683	0.711008	0.3171	0.655372	121.285	112.24	-0.111815	-0.471336	0.4961	0.807732
Auh	NM_001108407	chr17:12316164-12405224	243.303	206.812	-0.234435	-0.901835	0.20535	0.552735	234.851	212.682	-0.143048	-0.56382	0.44065	0.655792	200.645	201.15	0.00362981	0.0126713	0.985	0.99524	204.398	196.389	-0.0576719	-0.206036	0.77445	0.925519
Aup1	NM_001079899	chr4:113887114-113890103	58.2043	59.7608	0.0380738	0.119263	0.87295	0.952413	56.2119	63.2977	0.171278	0.535651	0.49065	0.69289	58.0263	53.6253	-0.113792	-0.302215	0.67185	0.862212	60.8223	52.3366	-0.21678	-0.576079	0.43305	0.778343
Aurka	NM_153296	chr3:170364178-170378204	3.42188	2.01029	-0.767382	-0.784249	0.28855	0.626176	3.30434	2.42538	-0.446149	-0.423446	0.5599	0.743342	1.951	2.29518	0.234394	0.183507	0.78815	0.915648	2.33181	2.23559	-0.0607924	-0.044646	0.94555	0.984995
Aurkaip1	NM_001004237	chr5:173274773-173276170	182.902	202.754	0.148657	0.494634	0.486	0.763921	176.57	183.806	0.0579412	0.188109	0.79295	0.889459	196.73	153.988	-0.353398	-1.02531	0.1477	0.499312	176.636	150.299	-0.232946	-0.660595	0.36505	0.74689
Aurkb	NM_053749	chr10:55626740-55632398	0.336529	0.67711	1.00866	0	1	1	0.324132	0.011815	-4.77789	0	1	1	0.658463	0	#NAME?	0	1	1	0.0113931	0	#NAME?	0	1	1
Aurkc	NM_001308536	chr1:69958451-69964546	8.09281	2.63512	-1.61877	-1.41702	0.06455	0.304724	7.8092	4.10723	-0.927011	-0.870299	0.2659	0.504719	2.55523	4.78215	0.904206	0.518575	0.4719	0.758827	3.94247	4.67435	0.245666	0.203858	0.7966	0.934809
Aven	NM_001107757	chr3:104042167-104117192	25.5742	25.2161	-0.0203462	-0.035301	0.95635	0.983366	24.6955	31.075	0.331505	0.57793	0.4192	0.63979	24.4529	39.0399	0.674944	1.09947	0.1178	0.459581	29.8566	38.063	0.350339	0.5829	0.4067	0.766669
Avil	NM_024401	chr7:70292564-70310588	1.24064	0.287177	-2.11107	-1.06335	0.2578	0.602288	1.19752	0.171344	-2.80509	-1.2153	0.2662	0.505125	0.277963	0.0209946	-3.72681	0	1	1	0.165226	0.0205372	-3.00813	0	1	1
Avp	NM_016992	chr3:123117481-123119460	1076.8	1700.37	0.6591	3.14884	0.0001	0.00395203	1039.54	24.0021	-5.43664	-12.1076	5e-05	0.000964063	1651.7	19.1415	-6.4311	-10.3354	5e-05	0.0020606	23.0429	18.7164	-0.300017	-0.367915	0.75955	0.920234
Avpi1	NM_134373	chr1:261365589-261371508	86.4436	93.306	0.110212	0.344393	0.6565	0.854919	83.4761	152.933	0.873464	2.91932	0.00065	0.00816715	90.6138	104.028	0.19917	0.569138	0.4502	0.745766	146.888	101.557	-0.532435	-1.66717	0.0344	0.346577
Avpr1a	NM_053019	chr7:67341365-67345290	0.101237	0	#NAME?	0	1	1	0.0976304	0.196916	1.01218	0	1	1	0	0	0	0	1	1	0.188903	0	#NAME?	0	1	1
Avpr1b	NM_017205	chr13:48367306-48378831	0	0	0	0	1	1	0	0	0	0	1	1	0	0	0	0	1	1	0	0	0	0	1	1
Avpr2	NM_019136	chrX:156889409-156891038	0	0	0	0	1	1	0	0	0	0	1	1	0	0	0	0	1	1	0	0	0	0	1	1
Awat1	NM_001109371	chrX:70408123-70414369	0	0	0	0	1	1	0	0	0	0	1	1	0	0	0	0	1	1	0	0	0	0	1	1
Awat2	NM_001191724	chrX:70224760-70233021	0	0	0	0	1	1	0	0	0	0	1	1	0	0	0	0	1	1	0	0	0	0	1	1
Axin2	NM_024355	chr10:97212482-97238822	1.48423	0.462912	-1.68091	-1.04609	0.15885	0.4878	1.43447	2.33275	0.701512	0.676161	0.4235	0.643011	0.448791	1.21027	1.43121	0.7437	0.27755	0.628556	2.2387	1.18267	-0.920611	-0.70222	0.4314	0.777993
Axl	NM_001013147	chr1:82550891-82580761	0.000213322	0.107933	8.98289	0	1	1	0.000201455	0.698195	11.759	0.0700876	0.06385	0.230667	0.104538	0.753689	2.84994	0.713558	0.29125	0.6367	0.672057	0.733942	0.127082	0.0358835	0.9097	0.974582
Axl	NM_031794	chr1:82550891-82580761	0.664641	0.289832	-1.19736	-0.603068	0.5156	0.779791	0.641635	0.00295593	-7.762	-0.538777	0.2146	0.46271	0.281806	1.89838	2.752	1.40094	0.4089	0.722411	0.00274258	1.85693	9.40317	0.533539	0.37735	0.752458
Azgp1	NM_012826	chr12:19196605-19202581	0.0581244	0	#NAME?	0	1	1	0.0559704	0	#NAME?	0	1	1	0	0	0	0	1	1	0	0	0	0	1	1
Azi2	NM_001025705	chr8:126411828-126434580	23.2356	24.8685	0.0979844	0.22612	0.75365	0.903201	22.425	18.0766	-0.310981	-0.648425	0.36225	0.591209	24.1413	25.1183	0.0572389	0.120012	0.86335	0.947694	17.3772	24.5161	0.496533	0.944493	0.18585	0.638696
Azin1	NM_001301702	chr7:77345645-77372398	6.83866	6.93067	0.0192806	0.0444554	0.9482	0.981684	6.58979	8.25412	0.324883	0.766229	0.2877	0.521062	6.72044	5.69892	-0.237868	-0.448888	0.51195	0.77918	7.94256	5.56232	-0.513917	-1.00872	0.1502	0.593311
Azin1	NM_022585	chr7:77345645-77372398	0.315446	0.185002	-0.769852	0	1	1	0.303388	0	#NAME?	0	1	1	0.179797	0.628855	1.80636	0.657873	0.58465	0.817011	0	0.615255	inf	#NAME?	0.18025	0.635601
Azin2	NM_001014261	chr5:147120127-147148576	16.0369	10.8808	-0.559615	-1.0571	0.18365	0.525138	15.482	13.7098	-0.17539	-0.353086	0.66845	0.814747	10.5697	13.0636	0.305613	0.480296	0.53485	0.790215	13.166	12.7604	-0.0451493	-0.0767897	0.9267	0.980175
B2m	NM_012512	chr3:114087286-114093311	64.7529	90.3753	0.480984	1.74753	0.0119	0.115142	62.3996	132.989	1.0917	4.11551	5e-05	0.000964063	87.6456	98.6658	0.170867	0.599929	0.39425	0.714952	127.934	96.2941	-0.409879	-1.53669	0.0325	0.339992
B3galnt1	NM_001013158	chr2:166226741-166255302	21.5635	25.3441	0.233058	0.573967	0.41095	0.718439	20.7955	27.176	0.38606	0.941155	0.19105	0.436755	24.5806	26.1511	0.0893531	0.204349	0.77225	0.908449	26.1599	25.516	-0.0359534	-0.0841576	0.9091	0.974582
B3galnt2	NM_001144851	chr17:53983181-54070399	1.61957	1.29934	-0.317838	-0.282115	0.6896	0.870408	1.56267	0.914308	-0.773259	-0.581679	0.4114	0.632747	1.2608	0.988845	-0.35052	-0.198741	0.75215	0.898679	0.878656	0.965655	0.136209	0.0693512	0.91355	0.975578
B3galt1	NM_001108954	chr3:54253948-54267292	3.47847	3.37385	-0.0440559	-0.0548033	0.936	0.976311	3.35914	2.92349	-0.2004	-0.230046	0.7314	0.853446	3.27497	5.75711	0.813865	0.926817	0.1919	0.555229	2.81042	5.62592	1.0013	1.12522	0.0918	0.50584
B3galt2	NM_001109492	chr13:60403770-60496511	4.92489	6.23417	0.340106	0.736706	0.3016	0.636701	4.74754	11.8987	1.32555	3.09751	0.0001	0.00170145	6.04169	6.1462	0.0247431	0.0515488	0.94355	0.980717	11.4502	5.99663	-0.933148	-2.19736	0.0049	0.127942
B3galt4	NM_133553	chr20:5446103-5447679	3.72956	2.63487	-0.501272	-0.421043	0.49275	0.767944	3.59919	4.36626	0.278726	0.267905	0.69995	0.836359	2.55247	2.35755	-0.11461	-0.0773782	0.9016	0.961699	4.19763	2.30115	-0.867224	-0.55376	0.4103	0.768452
B3galt5	NM_001105887	chr11:36677712-36683915	3.37905	3.58653	0.0859688	0.15078	0.8338	0.934865	3.25958	1.833	-0.830484	-1.14174	0.10725	0.315982	3.48034	1.71156	-1.02392	-1.30492	0.0688	0.359666	1.76093	1.67111	-0.0755343	-0.0791094	0.90535	0.972986
B3galt6	NM_001106699	chr5:173423474-173425611	4.67456	7.23697	0.630555	0.923589	0.20015	0.547328	4.5093	4.60544	0.0304367	0.0394346	0.95385	0.973193	7.02645	4.50042	-0.642735	-0.796615	0.26945	0.622789	4.4272	4.39116	-0.0117924	-0.0132417	0.9837	0.994446
B3gat1	NM_054003	chr8:27777226-27803071	11.7898	11.1172	-0.0847437	-0.153293	0.8346	0.935347	11.387	3.15495	-1.8517	-2.10497	0.00615	0.0459799	10.7954	3.11227	-1.79438	-1.6207	0.05465	0.318983	3.03654	3.03811	0.000747612	0.000575357	0.99705	0.998604
B3gat2	NM_022609	chr9:29984076-30068648	35.3553	50.2317	0.506672	1.52245	0.0594	0.290737	34.1564	48.2282	0.49772	1.6233	0.08115	0.268735	48.7697	40.3153	-0.274657	-0.812392	0.35115	0.680762	46.3017	39.397	-0.232979	-0.786885	0.4439	0.781215
B3gat3	NM_001128184	chr1:225120060-225126579	154.289	139.316	-0.147273	-0.590115	0.4295	0.729427	148.925	141.988	-0.068819	-0.289828	0.7127	0.842916	135.236	187.714	0.473056	1.79052	0.0196	0.178172	136.449	183.361	0.426326	1.71814	0.0335	0.342583
B3gnt1	NM_001106324	chr1:220322853-220325076	0.175217	0.3418	0.964012	0	1	1	0.169163	0.334039	0.981604	0	1	1	0.331676	0.272293	-0.284613	0	1	1	0.321017	0.26578	-0.272418	0	1	1
B3gnt1	NM_001106324_1	chr1:220416017-220418240	0.175217	0.3418	0.964012	0	1	1	0.169163	0.319109	0.915637	0	1	1	0.331676	0.272293	-0.284613	0	1	1	0.306698	0.26578	-0.206588	0	1	1
B3gnt2	NM_001107240	chr14:107592335-107617161	9.2005	13.6977	0.574151	1.32324	0.06545	0.306376	8.87413	4.14234	-1.09916	-1.87064	0.01175	0.0738185	13.2888	11.3302	-0.230033	-0.490511	0.4797	0.762226	3.98651	11.0486	1.47066	2.2903	0.00335	0.101165
B3gnt3	NM_001106068	chr16:20123947-20133322	0.102251	0	#NAME?	0	1	1	0.0986088	0	#NAME?	0	1	1	0	0	0	0	1	1	0	0	0	0	1	1
B3gnt4	NM_001105938	chr12:38503360-38504774	0	0.0249318	inf	0	1	1	0	0	0	0	1	1	0.0242515	0	#NAME?	0	1	1	0	0	0	0	1	1
B3gnt5	NM_053932	chr11:84919054-84931160	0	0	0	0	1	1	0	0	0	0	1	1	0	0	0	0	1	1	0	0	0	0	1	1
B3gnt6	NM_001106211	chr1:163143916-163148948	0	0	0	0	1	1	0	0	0	0	1	1	0	0	0	0	1	1	0	0	0	0	1	1
B3gnt7	NM_001012134	chr9:93326282-93330234	2.71075	2.32913	-0.218903	-0.219289	0.7602	0.905381	2.61553	1.2689	-1.04353	-0.886076	0.21535	0.46318	2.26233	1.03996	-1.12127	-0.694416	0.3646	0.692449	1.22029	1.01502	-0.265716	-0.141553	0.8479	0.950917
B3gnt8	NM_001107492	chr1:82419946-82422846	0.0353425	0	#NAME?	0	1	1	0.0340794	0	#NAME?	0	1	1	0	0	0	0	1	1	0	0	0	0	1	1
B3gntl1	NM_001015035	chr10:110800863-110863021	0.0239795	0.0457994	0.933527	0	1	1	0.0231879	0.0302804	0.385013	0	1	1	0.044544	1.33504	4.90551	1.60558	0.24875	0.60994	0.0291993	1.3048	5.48175	1.5083	0.2485	0.679537
B4galnt1	NM_022860	chr7:70452640-70467453	23.5532	35.4265	0.588905	1.64138	0.03185	0.20238	22.7408	35.67	0.649425	1.80617	0.0228	0.116718	34.3924	40.9904	0.253193	0.702145	0.3479	0.679061	34.2718	40.0295	0.224043	0.639028	0.42065	0.772996
B4galnt3	NM_001191976	chr4:152737160-152835182	0	0	0	0	1	1	0	0	0	0	1	1	0	0	0	0	1	1	0	0	0	0	1	1
B4galnt4	NM_001107562	chr1:213870327-213881233	33.4807	21.9354	-0.610071	-1.86453	0.0132	0.122335	32.3321	24.3744	-0.407602	-1.37423	0.1014	0.30566	21.2848	24.845	0.223132	0.582824	0.41925	0.728373	23.4086	24.2583	0.0514375	0.146658	0.8599	0.955481
B4galt1	NM_053287	chr5:57121767-57168610	0.0740275	0.0102757	-2.84882	0	1	1	0.0714674	0.166308	1.2185	0	1	1	0.00994233	0.00915043	-0.119745	0	1	1	0.159518	0.00891033	-4.1621	0	1	1
B4galt2	NM_001107965	chr5:136707509-136715981	55.1013	50.5189	-0.125264	-0.43158	0.5794	0.816605	53.1998	52.7635	-0.0118791	-0.0411555	0.96005	0.977137	49.0554	74.0355	0.593804	1.88791	0.01315	0.140964	50.6983	72.2939	0.511937	1.65937	0.03495	0.349077
B4galt3	NM_001009539	chr13:89643879-89649868	18.7308	24.2855	0.374681	0.906956	0.2091	0.558077	18.0786	12.6267	-0.517804	-1.04249	0.1471	0.37726	23.5676	16.4344	-0.520079	-1.0929	0.13545	0.481926	12.1418	16.0536	0.40292	0.715756	0.3218	0.723128
B4galt4	NM_001012018	chr11:64558009-64583969	13.1741	13.9859	0.0862705	0.160797	0.82135	0.929671	12.7103	6.36644	-0.997442	-1.47788	0.04085	0.173509	13.5871	5.17341	-1.39305	-1.64806	0.03095	0.231837	6.11981	5.04615	-0.278303	-0.297332	0.6732	0.883425
B4galt5	NM_001108608	chr3:164039730-164055561	16.1095	14.7771	-0.124546	-0.25743	0.712	0.882868	15.5411	18.6231	0.261006	0.555833	0.458	0.669635	14.3353	18.763	0.388322	0.729187	0.3045	0.645706	17.8912	18.3187	0.0340677	0.067491	0.9284	0.981255
B4galt6	NM_031740	chr18:14814149-15780289	10.6269	14.4596	0.444306	0.545463	0.43765	0.736531	10.248	11.4929	0.165395	0.220168	0.74655	0.861514	14.0253	10.0768	-0.476987	-0.560543	0.4124	0.724509	11.0495	9.83451	-0.168057	-0.225674	0.73725	0.911008
B4galt7	NM_001031661	chr17:9550025-9558624	30.8161	31.6859	0.0401595	0.0924611	0.90135	0.964481	29.7484	26.6477	-0.158798	-0.34226	0.63285	0.79215	30.7567	31.0089	0.0117812	0.0232143	0.9708	0.989668	25.6166	30.2448	0.239607	0.450625	0.5126	0.813907
B9d1	NM_001105786	chr10:47785018-47792616	0	0.0442685	inf	0	1	1	0	0.0513665	inf	0	1	1	0.0428314	0	#NAME?	0	1	1	0.0492717	0	#NAME?	0	1	1
B9d1	NM_001105786_1	chr10:49020469-49028067	0	0	0	0	1	1	0	0	0	0	1	1	0	0	0	0	1	1	0	0	0	0	1	1
B9d2	NM_001107494	chr1:82474105-82479699	127.987	112.063	-0.191681	-0.650463	0.37765	0.694615	123.555	110.828	-0.15683	-0.530449	0.48875	0.692465	108.788	90.8155	-0.260508	-0.740973	0.3196	0.657059	106.501	88.6619	-0.264481	-0.747124	0.31865	0.720952
Baalc	NM_144762	chr7:77763245-77836534	46.5449	43.5711	-0.0952536	-0.307551	0.66735	0.860219	44.9383	41.6561	-0.109418	-0.344178	0.6398	0.796485	42.3089	50.9931	0.26934	0.795729	0.27905	0.629716	40.0408	49.7768	0.314002	0.917549	0.2048	0.655407
Baat	NM_017300	chr5:64768398-64777368	0	0	0	0	1	1	0	0	0	0	1	1	0	0	0	0	1	1	0	0	0	0	1	1
Babam1	NM_001006964	chr16:19792849-19798881	104.718	131.751	0.331311	1.15174	0.1206	0.427549	101.168	125.299	0.308619	1.08787	0.16535	0.403329	127.895	103.245	-0.308887	-0.953223	0.19665	0.562002	120.364	100.775	-0.256269	-0.805115	0.2923	0.705912
Bace1	NM_019204	chr8:50140091-50162388	1.64092	2.02727	0.305036	0.228211	0.7174	0.885902	1.58377	1.3618	-0.217856	-0.147148	0.80795	0.896958	1.96502	4.53325	1.206	0.957378	0.1336	0.479439	1.30993	4.42479	1.75612	1.13611	0.12245	0.551555
Bace2	NM_001002802	chr11:37798396-37880624	3.09889	1.90921	-0.698779	-0.534053	0.41205	0.719212	2.98939	1.04506	-1.51626	-0.948774	0.165	0.40281	1.85228	4.19433	1.17914	0.758686	0.26345	0.618848	1.00269	4.09229	2.02904	1.17254	0.2391	0.678537
Bach1	NM_001107113	chr11:27365194-27398527	0.306992	0.283233	-0.116209	0	1	1	0.295731	0.280328	-0.0771706	0	1	1	0.275129	0.0987032	-1.47894	0	1	1	0.270324	0.0965548	-1.48527	0	1	1
Bad	NM_022698	chr1:222198533-222207453	108.78	122.381	0.169973	0.547148	0.4629	0.750868	105.019	99.88	-0.0723852	-0.229749	0.77195	0.877236	118.805	89.7675	-0.404332	-1.12174	0.13775	0.484991	95.9571	87.6632	-0.130418	-0.357301	0.6524	0.875434
Bag1	NM_001106647	chr5:57254420-57267002	108.407	143.807	0.407677	1.36795	0.0571	0.283881	104.692	97.1359	-0.108081	-0.344988	0.6297	0.790741	139.601	103.876	-0.426445	-1.29598	0.0698	0.362295	93.3184	101.395	0.119748	0.348498	0.63365	0.868306
Bag2	NM_001128195	chr9:38456486-38467121	21.7265	19.4443	-0.160115	-0.323833	0.6451	0.849148	20.9757	14.0082	-0.582449	-1.0499	0.1408	0.368172	18.8738	14.7765	-0.353079	-0.584198	0.41155	0.723947	13.4566	14.4256	0.100309	0.151116	0.8298	0.945098
Bag3	NM_001011936	chr1:199941257-199965191	7.24796	5.60863	-0.369926	-0.559025	0.43955	0.737956	6.99824	2.82255	-1.31	-1.57783	0.022	0.113916	5.44222	4.23683	-0.361211	-0.426576	0.6004	0.82442	2.71576	4.14143	0.608772	0.572134	0.4625	0.792955
Bag4	NM_001025130	chr16:71046474-71075874	8.46041	5.09826	-0.730722	-0.860925	0.2321	0.580277	8.16438	6.758	-0.272747	-0.319868	0.65545	0.806887	4.94881	8.20021	0.72858	0.698195	0.3217	0.658243	6.49663	8.00982	0.302077	0.300365	0.6744	0.884066
Bag5	NM_001008526	chr6:136182000-136185651	0.198496	0.35932	0.856159	0	1	1	0.191448	0.339271	0.825485	0	1	1	0.348897	0.268706	-0.376772	0	1	1	0.325925	0.262393	-0.31281	0	1	1
Bag5	NM_001008526_1	chr6:136275710-136279362	0.198374	0.359051	0.855968	0	1	1	0.19133	0.338986	0.825164	0	1	1	0.348635	0.268515	-0.376711	0	1	1	0.32565	0.262207	-0.312618	0	1	1
Bag6	NM_001033968	chr20:5125365-5138084	33.9344	30.0539	-0.175199	-0.592507	0.42475	0.726932	32.7679	37.1657	0.181691	0.653068	0.4098	0.631369	29.1747	31.0512	0.0899299	0.272153	0.71345	0.881612	35.7054	30.3238	-0.235691	-0.76668	0.3437	0.736057
Bag6	NM_053609	chr20:5125365-5138084	1.55835	2.18654	0.488629	0.378371	0.61035	0.831195	1.50454	1.9204	0.352089	0.253859	0.7626	0.871398	2.1219	0.723802	-1.55169	-0.952324	0.3039	0.645706	1.84443	0.707729	-1.38191	-0.827535	0.43175	0.777993
Bai1	NM_001170597	chr7:115766483-115828514	89.6514	78.3852	-0.193745	-0.862954	0.2643	0.606063	86.5681	110.796	0.355997	1.78394	0.03165	0.145162	76.1212	130.037	0.772555	3.35193	5e-05	0.0020606	106.442	127.009	0.254869	1.2698	0.1331	0.565567
Baiap2	NM_057196	chr10:109107388-109181962	133.061	150.626	0.178884	0.696537	0.34225	0.66783	128.543	135.236	0.0732269	0.296462	0.70415	0.838386	146.212	151.634	0.0525314	0.194903	0.7981	0.921425	129.926	148.077	0.188654	0.729079	0.3614	0.744955
Baiap2l1	NM_001034140	chr12:12227013-12321172	0.345402	0.955752	1.46836	0.703613	0.45055	0.74411	0.334247	0.0516173	-2.69499	0	1	1	0.92933	0.192358	-2.2724	-0.898968	0.31265	0.651149	0.0494977	0.187366	1.92043	0	1	1
Baiap2l2	NM_001271220	chr7:120492365-120518803	1.65926	1.66997	0.00928227	0.00633014	0.99365	0.996974	1.60357	0.811453	-0.982708	-0.687154	0.4579	0.669572	1.62205	0.127779	-3.6661	-1.26176	0.22555	0.591807	0.779237	0.124428	-2.64675	0	1	1
Bak1	NM_053812	chr20:5609620-5618260	4.19883	2.86853	-0.549676	-0.625308	0.37665	0.694194	4.05257	6.81727	0.750358	0.981705	0.17595	0.417374	2.78482	2.62254	-0.0866236	-0.0657082	0.92515	0.973302	6.55094	2.55613	-1.35774	-1.22233	0.06065	0.428083
Bambi	NM_139082	chr17:56905418-56909675	5.00814	4.79272	-0.0634299	-0.0463078	0.945	0.980348	4.83456	2.93889	-0.718115	-0.385937	0.61235	0.77842	4.65208	3.60434	-0.368139	-0.210177	0.776	0.90959	2.82212	3.52262	0.319873	0.18414	0.7807	0.928275
Banf1	NM_053631	chr1:220744194-220746224	267.744	427.762	0.675953	2.81822	0.00015	0.00511574	258.446	369.532	0.515835	2.11887	0.0046	0.0370624	415.324	251.615	-0.723022	-2.71698	0.00035	0.009932	355.264	245.713	-0.531918	-1.96371	0.0091	0.183683
Bank1	NM_001047918	chr2:241273764-241545250	0.621662	0.0277091	-4.4877	0	1	1	0.600853	0	#NAME?	#NAME?	0.0002	0.00305684	0.0268068	0	#NAME?	0	1	1	0	0	0	0	1	1
Banp	NM_001106191	chr19:54766594-54840586	28.1513	15.0886	-0.899745	-1.96883	0.0078	0.0870653	27.1846	17.8197	-0.609318	-1.37037	0.07725	0.260305	14.6425	27.5813	0.91353	1.73477	0.02085	0.183666	17.1146	26.929	0.653934	1.33034	0.0829	0.488696
Bap1	NM_001107292	chr16:7336684-7345511	33.4629	24.8936	-0.426787	-1.37995	0.0591	0.289511	32.302	31.8874	-0.0186387	-0.0632899	0.93475	0.962079	24.1629	42.749	0.8231	2.48469	0.00125	0.027769	30.6329	41.7457	0.446543	1.44636	0.06425	0.440838
Bard1	NM_022622	chr9:78297722-78368777	0.118988	0	#NAME?	0	1	1	0.115138	0.222968	0.953479	0	1	1	0	0	0	0	1	1	0.215012	0	#NAME?	0	1	1
Barhl1	NM_057109	chr3:7491233-7498555	0.230074	0	#NAME?	0	1	1	0.222173	0	#NAME?	0	1	1	0	0	0	0	1	1	0	0	0	0	1	1
Barhl2	NM_022956	chr14:4362716-4367607	0.0197687	0.194302	3.29701	0	1	1	0.0190679	0	#NAME?	0	1	1	0.18817	0	#NAME?	0	1	1	0	0	0	0	1	1
Barx1	NM_001108880	chr17:14824720-14828196	0	0	0	0	1	1	0	0	0	0	1	1	0	0	0	0	1	1	0	0	0	0	1	1
Basp1	NM_022300	chr2:77586423-77632626	1860.6	2550.66	0.455106	2.40845	0.0063	0.0754323	1796.93	3930.84	1.1293	7.78792	5e-05	0.000964063	2478.68	2476.97	-0.000994509	-0.00529754	0.99545	0.99854	3773.42	2419.33	-0.641264	-4.6296	0.0001	0.00646145
Batf	NM_001106748	chr6:109562616-109584541	0	0	0	0	1	1	0	1.90647	inf	#NAME?	0.0002	0.00305684	0	0	0	0	1	1	1.83836	0	#NAME?	#NAME?	5e-05	0.00359193
Batf3	NM_021865	chr13:109713488-109724865	2.49022	2.08508	-0.256169	-0.133307	0.84795	0.940933	2.40916	4.77757	0.987748	0.530043	0.56825	0.748242	2.01763	5.75756	1.5128	0.677022	0.4896	0.768181	4.59158	5.61181	0.289475	0.130619	0.3205	0.721918
Bax	NM_017059	chr1:101451800-101457208	196.646	206.486	0.070446	0.226315	0.75105	0.902119	189.766	264.386	0.478422	1.57416	0.03275	0.148983	200.359	205.855	0.0390461	0.114354	0.8693	0.950187	254.076	200.94	-0.338496	-1.03739	0.1526	0.597668
Baz1a	NM_001170568	chr6:75793222-75873854	3.01233	1.37165	-1.13497	-1.35641	0.0689	0.315298	2.90563	0.491324	-2.56411	-1.71636	0.0574	0.218239	1.3276	2.72125	1.03545	1.10295	0.1242	0.46708	0.472929	2.65621	2.48968	1.83275	0.0381	0.360609
Baz1b	NM_001191916	chr12:24478881-24536851	18.9025	13.4485	-0.491132	-1.54202	0.0276	0.185875	18.2452	16.7545	-0.122968	-0.3955	0.5739	0.752283	13.0431	24.2774	0.896328	2.6282	0.0004	0.0111341	16.1093	23.705	0.557303	1.72152	0.0171	0.251627
Baz2a	NM_001107158	chr7:2518266-2548840	2.8442	2.17602	-0.386329	-0.592919	0.39275	0.707028	2.74589	3.15481	0.200279	0.32836	0.64	0.796485	2.10979	2.98258	0.499462	0.661994	0.31005	0.649446	3.03283	2.90946	-0.0599085	-0.0840924	0.90445	0.97274
Baz2b	NM_001108260	chr3:45970036-46234331	10.444	6.44153	-0.697199	-1.80281	0.00995	0.10237	10.0868	6.8361	-0.561229	-1.42191	0.04625	0.188522	6.25041	9.78913	0.647229	1.46407	0.0438	0.2827	6.569	9.55761	0.540976	1.21328	0.0883	0.499671
Bbc3	NM_173837	chr1:78261504-78267802	20.3995	14.8606	-0.457038	-0.888535	0.25265	0.598519	19.6938	15.9318	-0.305834	-0.599689	0.4584	0.669948	14.4309	13.5603	-0.0897737	-0.139513	0.8641	0.947859	15.3125	13.2495	-0.208773	-0.333972	0.68895	0.890224
Bbox1	NM_022629	chr3:101427051-101465995	0.036458	0.22527	2.62735	0	1	1	0.0350938	0	#NAME?	0	1	1	0.219057	0	#NAME?	0	1	1	0	0	0	0	1	1
Bbs1	NM_001107569	chr1:220147591-220165527	6.89614	8.60593	0.319541	0.641477	0.3679	0.689253	6.65779	4.99791	-0.413718	-0.732715	0.32025	0.551939	8.34945	7.37153	-0.179718	-0.317119	0.6408	0.846046	4.80262	7.1906	0.582291	0.903397	0.1845	0.638309
Bbs10	NM_001109286	chr7:54031323-54034347	5.5318	4.49328	-0.299978	-0.45343	0.50595	0.775905	5.33174	1.1947	-2.15796	-2.03042	0.0208	0.10959	4.35956	2.33881	-0.898412	-0.894567	0.1975	0.563346	1.14854	2.28753	0.993989	0.603736	0.3704	0.748537
Bbs2	NM_053618	chr19:11386023-11421498	14.5678	9.36799	-0.636974	-1.21603	0.08585	0.358285	14.0507	15.7584	0.165485	0.339659	0.63305	0.792191	9.0911	13.341	0.553338	0.908137	0.19525	0.560059	15.1542	13.0266	-0.218259	-0.39339	0.57325	0.842827
Bbs4	NM_001106826	chr8:64121391-64154396	20.5472	16.8871	-0.283021	-0.687317	0.33515	0.661565	19.8295	19.1212	-0.0524736	-0.123207	0.85765	0.923338	16.3862	14.2337	-0.203177	-0.402862	0.57365	0.810378	18.3797	13.8967	-0.403373	-0.795055	0.26405	0.685061
Bbs5	NM_001108583	chr3:55886694-55907717	16.1027	11.8941	-0.437062	-0.745844	0.29535	0.631166	15.5094	12.4593	-0.31592	-0.522884	0.47015	0.679099	11.5301	8.79428	-0.390767	-0.507376	0.4725	0.759436	11.9812	8.58333	-0.481167	-0.589942	0.3983	0.763433
Bbs7	NM_001012180	chr2:123283401-123322991	6.98517	3.19879	-1.12677	-1.53042	0.02685	0.184002	6.74002	2.87858	-1.2274	-1.4436	0.05185	0.203358	3.10201	3.64947	0.234484	0.244887	0.7124	0.88153	2.76809	3.56487	0.36496	0.339887	0.633	0.867861
Bbx	NM_001079938	chr11:53081024-53228557	6.58575	6.41983	-0.0368136	-0.0583853	0.9301	0.975375	6.3548	2.15619	-1.55936	-1.65089	0.0312	0.144056	6.22741	6.49334	0.060329	0.0836427	0.8995	0.960263	2.07496	6.34303	1.61209	1.43571	0.0608	0.428527
Bc1	NR_036653	chr1:218075358-218075511	5.43514	3.28631	-0.725852	-0.243971	0.52675	0.786981	5.2458	3.18066	-0.721839	-0.246337	0.56505	0.745871	3.18747	6.76255	1.08515	0.379297	0.51485	0.780033	3.06145	6.60034	1.10832	0.376027	0.5603	0.835869
Bcam	NM_031752	chr1:80674462-80689122	5.13845	7.89775	0.620109	0.874449	0.24355	0.590232	4.96037	3.76293	-0.398593	-0.461027	0.59105	0.765348	7.67017	1.03121	-2.89492	-1.86703	0.02095	0.18413	3.61301	1.00518	-1.84575	-1.1237	0.11225	0.54082
Bcan	NM_001033665	chr2:187359674-187372652	35.1469	39.2717	0.160089	0.528364	0.4844	0.762961	33.9386	22.0291	-0.623519	-1.98646	0.0216	0.112641	38.1318	23.1855	-0.717773	-1.87672	0.01735	0.165321	21.1578	22.6414	0.0977753	0.248017	0.772	0.924358
Bcan	NM_012916	chr2:187359674-187372652	9.69685	7.41794	-0.386499	-0.614708	0.47225	0.755419	9.36658	8.43601	-0.150962	-0.276115	0.7663	0.87344	7.20518	9.13982	0.343132	0.441768	0.5789	0.813208	8.10363	8.92097	0.138632	0.202644	0.81205	0.93856
Bcap29	NM_001006980	chr6:50883779-50923743	11.0081	13.4693	0.291112	0.578001	0.41125	0.718439	10.5989	21.6387	1.0297	2.17418	0.00695	0.0498317	13.0522	13.8359	0.0841325	0.157371	0.82875	0.933423	20.8303	13.4921	-0.626571	-1.30246	0.08585	0.494739
Bcap31	NM_001004224	chrX:157095936-157126397	88.4385	100.837	0.189276	0.617756	0.38135	0.69769	85.3373	132.355	0.633161	2.07845	0.0038	0.0320024	97.8496	73.5876	-0.411104	-1.16017	0.09965	0.428388	127.261	71.8767	-0.824189	-2.36237	0.00185	0.0679273
Bcar1	NM_012931	chr19:43932553-43955783	10.0744	18.4998	0.876822	2.03902	0.00545	0.0692227	9.72428	14.3036	0.556714	1.22425	0.10435	0.310875	17.9653	15.2634	-0.235136	-0.584747	0.47335	0.759796	13.7433	14.9137	0.117914	0.281211	0.7452	0.91418
Bcar3	NM_001107722	chr2:226563049-226679438	4.37026	4.91381	0.169124	0.228326	0.7527	0.90296	4.21574	4.88761	0.213342	0.277033	0.68475	0.825177	4.77094	5.92356	0.312193	0.418115	0.56095	0.804026	4.70031	5.77904	0.298074	0.380927	0.5721	0.842187
Bcas1	NM_145670	chr3:167957993-168033457	92.0206	39.661	-1.21424	-4.11043	5e-05	0.0023396	88.79	44.3082	-1.00283	-3.53557	5e-05	0.000964063	38.4614	59.4788	0.628962	1.87311	0.00955	0.114945	42.5745	58.0673	0.447739	1.37981	0.0564	0.416125
Bcas2	NM_001106458	chr2:205662632-205670514	130.692	195.479	0.580838	1.96736	0.006	0.0736495	126.064	141.5	0.166641	0.532227	0.45245	0.665288	189.61	114.849	-0.723304	-2.20184	0.002	0.039402	136.075	112.065	-0.28007	-0.810498	0.24865	0.679537
Bcas3	NM_001173430	chr10:72756547-73271851	27.2835	16.2456	-0.747977	-1.94024	0.01085	0.108947	26.3423	16.5216	-0.673031	-1.68478	0.0212	0.111198	15.7728	21.2215	0.428083	0.995035	0.1818	0.543815	15.8829	20.7244	0.383863	0.867489	0.22645	0.673815
Bcat1	NM_017253	chr4:179259304-179307095	849.561	742.072	-0.195158	-0.857725	0.2304	0.578996	819.671	672.511	-0.285488	-1.43353	0.0457	0.187191	720.107	798.795	0.149614	0.628816	0.3743	0.699892	646.573	779.863	0.270407	1.28177	0.0738	0.469571
Bcat2	NM_022400	chr1:101554641-101572103	13.4448	4.95561	-1.43991	-1.76272	0.0215	0.161016	12.9737	3.29491	-1.97728	-1.84123	0.009	0.0603242	4.81145	12.7355	1.40431	1.51799	0.0432	0.280848	3.17429	12.4488	1.9715	1.61914	0.02555	0.304337
Bccip	NM_001108505	chr1:205777473-205842428	81.3955	104.826	0.364979	0.959123	0.1863	0.528196	78.5038	88.8156	0.178051	0.45461	0.53155	0.723735	101.636	72.1105	-0.495129	-1.1744	0.09845	0.426057	85.4349	70.3822	-0.279616	-0.647225	0.36375	0.746475
Bcdin3d	NM_001108751	chr7:141132117-141136700	20.5042	27.0543	0.399943	0.749658	0.3052	0.639692	19.7889	16.1379	-0.29424	-0.480983	0.4928	0.694446	26.2595	14.5089	-0.855901	-1.28637	0.0723	0.368158	15.5139	14.1622	-0.131514	-0.173798	0.81445	0.939175
Bche	NM_022942	chr2:171104475-171196186	0.420619	0	#NAME?	0	1	1	0.40692	0.021124	-4.26779	0	1	1	0	0	0	0	1	1	0.0202563	0	#NAME?	0	1	1
Bckdha	NM_012782	chr1:82423290-82452057	128.92	61.1201	-1.07676	-3.40244	5e-05	0.0023396	124.485	63.6174	-0.968476	-3.08451	0.00015	0.00238596	59.291	98.6059	0.733861	2.06106	0.00435	0.0683747	61.1692	96.298	0.654701	1.85985	0.01295	0.225912
Bckdhb	NM_019267	chr8:91464228-91656134	69.8232	48.6448	-0.52142	-1.5343	0.0296	0.19355	67.3481	44.156	-0.609028	-1.70783	0.01665	0.094522	47.1935	40.388	-0.224661	-0.539121	0.4412	0.740452	42.4382	39.4248	-0.106258	-0.244509	0.73125	0.908251
Bckdk	NM_019244	chr1:199351627-199356298	38.2458	32.9171	-0.216466	-0.580577	0.4307	0.730807	36.9301	24.8877	-0.569366	-1.40289	0.05555	0.213442	31.9586	41.8463	0.388897	0.954434	0.2077	0.571592	23.9206	40.8725	0.772876	1.75272	0.0268	0.316562
Bcl10	NM_031328	chr2:251805391-251814954	11.1815	15.5741	0.478037	0.883899	0.195	0.541317	10.7782	8.37218	-0.364437	-0.56794	0.41635	0.637189	15.1228	17.0086	0.169544	0.303137	0.6641	0.857938	8.0555	16.583	1.04166	1.54236	0.02765	0.318843
Bcl11a	NM_001191683	chr14:108826938-108913078	10.7518	15.2042	0.499882	1.1516	0.1496	0.472559	10.3838	10.9834	0.0809921	0.172348	0.8313	0.910208	14.7714	16.1753	0.130984	0.296906	0.72895	0.88949	10.5535	15.8006	0.582248	1.24706	0.1343	0.567524
Bcl11b	NM_001277287	chr6:131834096-131926272	1.88106	0.48783	-1.9471	-1.11245	0.22225	0.57091	1.81522	0.000130506	-13.7637	-0.194832	0.21065	0.459029	0.474195	0.791548	0.739195	0.383595	0.604	0.825566	0.000122614	0.772245	12.6207	0.127892	0.2083	0.656151
Bcl11b	NM_001277288	chr6:131834096-131926272	16.2873	19.8177	0.283041	0.919167	0.19085	0.534106	15.7037	9.0405	-0.796633	-2.29459	0.00135	0.014453	19.2304	5.36995	-1.84041	-4.28494	5e-05	0.0020606	8.68929	5.24249	-0.728985	-1.52771	0.0353	0.350845
Bcl2	NM_016993	chr13:26605425-26769374	2.22937	1.39692	-0.674381	-0.40275	0.59135	0.823329	2.15385	0.336097	-2.67997	-1.16914	0.2646	0.50391	1.35545	0	#NAME?	#NAME?	5e-05	0.0020606	0.322381	0	#NAME?	0	1	1
Bcl2a1	NM_133416	chr8:96551423-96559527	15.0842	9.60311	-0.651469	-0.650438	0.3664	0.688317	14.5359	19.3878	0.415534	0.477662	0.5077	0.706496	9.30165	18.2221	0.97013	0.839206	0.26325	0.618848	18.672	17.766	-0.0717615	-0.0789175	0.91885	0.977467
Bcl2l1	NM_001033670	chr3:148259593-148313810	24.1685	17.9385	-0.430066	-0.740078	0.2889	0.626176	23.3164	1.87344	-3.63758	-1.95648	0.14005	0.366966	17.4022	13.7671	-0.338039	-0.357319	0.59415	0.82109	1.80526	13.4301	2.8952	1.42486	0.15605	0.602412
Bcl2l1	NM_001033671	chr3:148259593-148313810	3.6547	9.44257	1.36943	0.816542	0.41555	0.720697	3.5345	29.1282	3.04284	2.08357	0.19595	0.443203	9.18084	18.6859	1.02525	0.927866	0.33935	0.672934	27.9904	18.2634	-0.615978	-0.88666	0.2549	0.680036
Bcl2l1	NM_001033672	chr3:148259593-148313810	0.244225	0.135303	-0.852022	0	1	1	0.235488	0.0123499	-4.25309	0	1	1	0.131228	0.0187844	-2.80447	0	1	1	0.0118466	0.0182918	0.626716	0	1	1
Bcl2l1	NM_031535	chr3:148259593-148313810	0	0	0	0	1	1	0	0	0	0	1	1	0	0	0	0	1	1	0	0	0	0	1	1
Bcl2l10	NM_053733	chr8:82288704-82294750	0.0942319	0.0591462	-0.671929	0	1	1	0.0907376	1.82716	4.33176	1.44118	0.23295	0.478261	0.0572253	0.488404	3.09335	0	1	1	1.75305	0.475712	-1.8817	-0.745519	0.3533	0.740132
Bcl2l11	NM_022612	chr3:120726905-120764192	0	0.230371	inf	0	1	1	0	0	0	0	1	1	0.222899	0	#NAME?	0	1	1	0	0	0	0	1	1
Bcl2l11	NM_171988	chr3:120726905-120764192	0.0683816	0.231684	1.76048	0	1	1	0.0658941	0.5851	3.15046	0	1	1	0.22489	0.226631	0.011126	0	1	1	0.561908	0.221689	-1.3418	0	1	1
Bcl2l11	NM_171989	chr3:120726905-120764192	0	0	0	0	1	1	0	0	0	0	1	1	0	0	0	0	1	1	0	0	0	0	1	1
Bcl2l12	NM_001108480	chr1:100984549-100997199	0.812667	0.935845	0.203605	0.101063	0.90135	0.964481	0.784543	0.946335	0.270498	0.142424	0.66315	0.811978	0.908434	3.21632	1.82396	0.987288	0.4472	0.744544	0.909814	3.14542	1.78961	0.998112	0.39285	0.760804
Bcl2l13	NM_001107885	chr4:153385203-153435963	0.78392	1.61338	1.04131	0.492472	0.4707	0.754281	0.758041	0	#NAME?	#NAME?	0.11915	0.334883	1.56147	0.364923	-2.09724	-0.777404	0.32245	0.659058	0	0.355622	inf	0	1	1
Bcl2l14	NM_001024338	chr4:168140007-168183090	0	1.04473	inf	#NAME?	0.00015	0.00511574	0	0	0	0	1	1	1.01077	0	#NAME?	#NAME?	0.0114	0.129086	0	0	0	0	1	1
Bcl2l15	NM_001106459	chr2:206314212-206319332	1.8665	2.0909	0.163789	0.0876404	0.89535	0.962224	1.79638	0.165062	-3.44401	-1.14643	0.35625	0.586068	2.02816	1.14888	-0.819942	-0.3543	0.58675	0.818125	0.158282	1.12377	2.82778	0.85402	0.49975	0.808746
Bcl2l2	NM_021850	chr15:33544311-33549165	33.4358	40.7606	0.285782	1.00752	0.16355	0.495393	32.2599	43.319	0.425255	1.47894	0.0397	0.170318	39.5638	43.7525	0.145184	0.47988	0.50455	0.775816	41.6395	42.71	0.036619	0.121193	0.8624	0.956238
Bcl3	NM_001109422	chr1:80730757-80744993	0.564984	1.49429	1.40318	0.747617	0.44675	0.741432	0.546035	0.00647805	-6.39729	0	1	1	1.45376	2.29942	0.661481	0.389357	0.418	0.727741	0.00624667	2.24658	8.49043	1.88966	0.14835	0.591032
Bcl6	NM_001107084	chr11:80255789-80279075	2.80358	4.14105	0.562724	0.816785	0.2428	0.589758	2.70507	4.17193	0.62505	0.874388	0.2142	0.462273	4.01671	6.1941	0.624881	0.966076	0.1686	0.528313	4.01058	6.04893	0.59287	0.921378	0.20255	0.655051
Bcl6b	NM_001108279	chr10:56834363-56839437	0.229732	0.674611	1.5541	0.699741	0.3197	0.649697	0.221943	0.541566	1.28695	0.523409	0.48495	0.690677	0.652693	0.357654	-0.86784	-0.423012	0.4774	0.761268	0.522239	0.348734	-0.582584	-0.262801	0.6106	0.859044
Bcl7b	NM_001109021	chr12:24543747-24557093	40.7246	46.019	0.176331	0.547031	0.48395	0.762961	39.3351	55.8277	0.505163	1.66885	0.0524	0.204694	44.6862	36.8312	-0.278902	-0.761267	0.34235	0.675605	53.6213	35.9732	-0.575883	-1.70062	0.05255	0.405737
Bcl7c	NM_001106298	chr1:199155295-199159125	53.0039	45.3565	-0.224789	-0.50093	0.5086	0.776864	51.1888	73.9852	0.531408	1.30286	0.11905	0.334682	44.0548	73.3837	0.736159	1.54882	0.05345	0.315113	71.0399	71.6932	0.0132055	0.0328311	0.9713	0.991809
Bcl9l	NM_001106817	chr8:48805683-48834312	6.84465	4.98721	-0.456744	-1.06606	0.18455	0.526424	6.61232	8.20625	0.311566	0.83794	0.3394	0.570031	4.84253	6.6223	0.451573	0.898893	0.2349	0.601817	7.88187	6.46494	-0.285901	-0.657591	0.42875	0.777139
Bclaf1	NM_001047852	chr1:15799852-15826637	17.5726	23.7259	0.433135	1.17204	0.0957	0.38163	16.9629	27.0561	0.673571	1.77156	0.0148	0.086924	23.0114	18.1995	-0.338455	-0.81677	0.24465	0.60891	26.0177	17.7643	-0.55051	-1.3289	0.06335	0.43726
Bco1	NM_053648	chr19:49637058-49673576	0.0882297	0.160326	0.861674	0	1	1	0.0849696	0.374973	2.14177	0	1	1	0.155118	0	#NAME?	0	1	1	0.359594	0	#NAME?	0	1	1
Bco2	NM_001127712	chr8:54965576-54990604	0.292825	0.988057	1.75455	0.855713	0.1744	0.51221	0.282636	1.20341	2.09011	1.1158	0.1056	0.313246	0.960866	0.0664453	-3.8541	-1.29593	0.2039	0.567431	1.15546	0.064704	-4.15847	-1.43271	0.204	0.655407
Bcor	NM_001191586	chrX:11648988-11691098	2.49334	2.76197	0.147619	0.240225	0.73045	0.89166	2.40701	2.90022	0.268919	0.430651	0.54995	0.735882	2.67894	2.86517	0.0969553	0.141746	0.8432	0.939906	2.78667	2.79851	0.00611614	0.00903759	0.9894	0.995944
Bcorl1	NM_001191587	chrX:135187467-135233847	3.8534	4.97328	0.368065	0.852628	0.25975	0.603518	3.72028	5.18612	0.479245	1.08048	0.1493	0.380819	4.82769	3.96272	-0.284843	-0.580813	0.44045	0.740023	4.98501	3.86973	-0.365365	-0.735682	0.33395	0.72984
Bcs1l	NM_001007666	chr9:81868264-81872198	18.605	9.89305	-0.911205	-1.51627	0.03425	0.211265	17.9594	7.94368	-1.17686	-1.74042	0.01425	0.0846694	9.60055	12.5325	0.384488	0.501668	0.47955	0.762092	7.64058	12.2246	0.678037	0.82391	0.22345	0.670756
Bdh1	NM_053995	chr11:72578924-72613924	22.3625	19.7446	-0.179619	-0.356535	0.62325	0.838406	21.5918	13.1559	-0.714775	-1.27067	0.0833	0.272316	19.1431	18.3389	-0.0619161	-0.10489	0.8838	0.95575	12.6437	17.9099	0.502342	0.768261	0.2893	0.70376
Bdh2	NM_001106473	chr2:240461504-240482145	6.07576	10.6045	0.803539	0.790298	0.2426	0.589758	5.87426	0.367363	-3.99913	-1.82515	0.2227	0.469975	10.2857	2.02673	-2.34342	-1.62521	0.03705	0.256905	0.352265	1.97894	2.48999	1.00055	0.2747	0.694011
Bdkrb1	NM_030851	chr6:129438157-129440574	0	0	0	0	1	1	0	0	0	0	1	1	0	0	0	0	1	1	0	0	0	0	1	1
Bdkrb2	NM_001270713	chr6:129399467-129429676	0	6.14703e-05	inf	0	1	1	0	7.20369e-06	inf	0	1	1	5.77331e-05	6.42244e-05	0.153723	0	1	1	6.94656e-06	6.0625e-05	3.12554	0	1	1
Bdkrb2	NM_173100	chr6:129399467-129429676	0	0.11466	inf	0	1	1	0	0.0734524	inf	0	1	1	0.111523	0.386811	1.79428	0	1	1	0.0708308	0.378382	2.4174	0	1	1
Bdnf	NM_001270630	chr3:100768636-100819214	1.24642	4.78587	1.94099	1.3518	0.12245	0.430156	1.20299	0	#NAME?	#NAME?	0.12465	0.341955	4.64344	2.6321	-0.818982	-0.517557	0.3921	0.71376	0	2.5629	inf	#NAME?	0.18825	0.640382
Bdnf	NM_001270631	chr3:100768636-100819214	0.885806	0.810961	-0.127358	-0.0533433	0.9293	0.975288	0.855715	0.320567	-1.4165	-0.492159	0.54035	0.729364	0.784518	0	#NAME?	#NAME?	0.17775	0.538887	0.308773	0	#NAME?	0	1	1
Bdnf	NM_001270632	chr3:100768636-100819214	1.06199	0.191468	-2.47159	-0.778323	0.48465	0.763047	1.0228	0	#NAME?	#NAME?	0.1818	0.424128	0.18621	0	#NAME?	0	1	1	0	0	0	0	1	1
Bdnf	NM_001270633	chr3:100768636-100819214	0.365679	2.12059	2.53582	1.29769	0.2527	0.598519	0.352259	5.84005	4.05127	2.36813	0.1268	0.34505	2.05267	2.85237	0.474662	0.375656	0.60445	0.825782	5.60779	2.78519	-1.00966	-1.00854	0.184	0.638298
Bdnf	NM_001270634	chr3:100768636-100819214	0	0	0	0	1	1	0	0	0	0	1	1	0	0	0	0	1	1	0	0	0	0	1	1
Bdnf	NM_001270635	chr3:100768636-100819214	0.165159	0	#NAME?	0	1	1	0.158961	0	#NAME?	0	1	1	0	0	0	0	1	1	0	0	0	0	1	1
Bdnf	NM_001270636	chr3:100768636-100819214	5.29635e-05	0	#NAME?	0	1	1	4.90657e-05	0	#NAME?	0	1	1	0	0	0	0	1	1	0	0	0	0	1	1
Bdnf	NM_001270637	chr3:100768636-100819214	4.43873e-05	0	#NAME?	0	1	1	4.11471e-05	5.21299e-05	0.34132	0	1	1	0	0.000124643	inf	0	1	1	4.88816e-05	0.00011779	1.26885	0	1	1
Bdnf	NM_001270638	chr3:100768636-100819214	1.82714	0.304382	-2.58563	-0.873855	0.2371	0.5849	1.75755	1.68199	-0.063394	-0.0316654	0.95305	0.973089	0.29451	2.54824	3.11312	0.915744	0.2934	0.638181	1.62177	2.49187	0.619657	0.271246	0.6897	0.890696
Bdnf	NM_012513	chr3:100768636-100819214	0	0.509917	inf	0	1	1	0	0.273393	inf	0	1	1	0.494477	0.410614	-0.268119	0	1	1	0.263634	0.399841	0.600889	0	1	1
Bdp1	NM_001199195	chr2:30327612-30340208	9.12099	11.7227	0.36204	0.485465	0.49895	0.77287	8.80692	13.7189	0.63946	0.844629	0.25465	0.496385	11.3787	19.9963	0.813396	1.13346	0.11335	0.452275	13.1791	19.5122	0.566122	0.833781	0.2593	0.681605
Becn1	NM_001034117	chr10:89199987-89225297	79.0854	78.2851	-0.0146742	-0.0451278	0.9466	0.98086	76.2608	82.2913	0.109797	0.374546	0.6	0.77049	75.895	63.7852	-0.250783	-0.71421	0.3115	0.649995	79.1686	62.2462	-0.346941	-1.09288	0.1242	0.551555
Becn1	NM_053739	chr10:89199987-89225297	5.19565	6.2917	0.276147	0.131487	0.82225	0.929937	5.01112	0.703205	-2.83312	-1.24377	0.27855	0.514162	6.11709	0.00172246	-11.7942	-0.243063	0.26575	0.620611	0.677706	0.00161128	-8.71631	-0.179069	0.41975	0.772354
Begain	NM_001111115	chr6:132936963-132972569	3.7045	1.90451	-0.959858	-0.304517	0.6131	0.83299	3.57386	0.00892086	-8.64608	-0.624086	0.27665	0.513032	1.83981	0.0131479	-7.12858	-0.491188	0.36805	0.694703	0.00827048	0.0123386	0.577131	0	1	1
Begain	NM_024163	chr6:132936963-132972569	75.8553	51.2804	-0.564843	-2.11845	0.01295	0.121288	73.2741	43.5094	-0.751975	-3.01758	0.00055	0.00712448	49.8155	91.1636	0.871862	3.37998	0.00015	0.00492803	41.8057	89.0798	1.0914	4.55528	5e-05	0.00359193
Bend5	NM_001108672	chr5:131257126-131312335	16.3371	14.1771	-0.204587	-0.382298	0.5806	0.81689	15.7742	19.773	0.325963	0.650351	0.3831	0.607642	13.7532	13.5062	-0.0261434	-0.0414437	0.9521	0.98373	18.9968	13.1925	-0.526034	-0.912177	0.20625	0.655809
Bend6	NM_001108792	chr9:38297252-38351024	37.5048	42.0704	0.165731	0.500448	0.4797	0.760782	36.1767	42.6016	0.235847	0.689763	0.33195	0.563488	40.8229	46.0988	0.175351	0.494848	0.4793	0.762092	40.9372	44.99	0.136191	0.380841	0.58375	0.846144
Bend7	NM_001191834	chr17:77448429-77527888	0.109184	0.814813	2.8997	0.990358	0.2498	0.596359	0.10513	0	#NAME?	0	1	1	0.790484	2.19916	1.47614	0.753984	0.16895	0.528416	0	2.15126	inf	#NAME?	5e-05	0.00359193
Best1	NM_001011940	chr1:225906796-226152568	0.274637	0.391277	0.510665	0	1	1	0.264755	0.744564	1.49174	0.126328	0.46695	0.676812	0.37987	0.505258	0.411517	0	1	1	0.715865	0.493178	-0.537578	-0.0584529	0.75845	0.920028
Best2	NM_001108895	chr19:26122880-26129619	0	0	0	0	1	1	0	0	0	0	1	1	0	0.0972984	inf	0	1	1	0	0.0947456	inf	0	1	1
Best3	NM_001191783	chr7:60015997-60057154	0	0	0	0	1	1	0	0.485043	inf	0	1	1	0	0.208271	inf	0	1	1	0.466248	0.203741	-1.19436	0	1	1
Bet1	NM_019251	chr4:29082367-29092638	19.6969	26.8628	0.447639	1.04288	0.1308	0.443893	18.9856	22.5486	0.248129	0.562106	0.42715	0.645037	26.067	16.6218	-0.649148	-1.31068	0.0575	0.328898	21.6941	16.2207	-0.419461	-0.827401	0.25905	0.681366
Bet1l	NM_019368	chr1:213602849-213605643	35.4876	33.7914	-0.0706573	-0.16682	0.814	0.927378	34.2561	39.3572	0.200265	0.466753	0.52085	0.715063	32.7919	30.9476	-0.0835094	-0.167723	0.811	0.925689	37.8059	30.2061	-0.323774	-0.656517	0.3657	0.746924
Bex1	NM_001037365	chr1:116565789-116567189	427.851	811.621	0.923697	3.5654	5e-05	0.0023396	412.884	588.52	0.511354	1.94685	0.00675	0.0488458	787.179	454.167	-0.79347	-2.86365	0.0001	0.00359969	565.897	443.18	-0.352647	-1.25737	0.077	0.475197
Bex2	NM_001077435	chrX:106556837-106558366	1877.06	3037.86	0.694583	3.00503	5e-05	0.0023396	1811.01	2703.5	0.578036	2.76279	0.00015	0.00238596	2947.28	2005.13	-0.555687	-2.29721	0.0014	0.03052	2599.35	1956.85	-0.409618	-1.8636	0.00855	0.177858
Bex4	NM_001037554	chrX_KL568122v1_random:30534-31127	0	0	0	0	1	1	0	0	0	0	1	1	0	0	0	0	1	1	0	0	0	0	1	1
Bfar	NM_001013125	chr10:1464657-1497653	9.93589	15.1008	0.6039	1.30225	0.0672	0.311576	9.58689	12.4626	0.378465	0.766969	0.27505	0.511649	14.6541	10.2338	-0.517968	-1.00303	0.14745	0.4989	11.9822	9.99182	-0.262071	-0.465302	0.5056	0.811627
Bfsp1	NM_031555	chr3:137935344-137969658	3.54386	2.35065	-0.592263	-0.513131	0.5169	0.780495	3.4239	0.612911	-2.48189	-1.35995	0.0235	0.119157	2.28601	0.611936	-1.90138	-1.00641	0.15615	0.514602	0.59053	0.597367	0.016607	0.00703874	0.16635	0.61647
Bfsp2	NM_001277434	chr8:111908613-111965889	0.427372	1.14406	1.4206	0.643816	0.43485	0.734541	0.411997	0.927338	1.17046	0.470231	0.5093	0.707324	1.11268	0.127601	-3.12433	-1.22346	0.46105	0.753746	0.894226	0.124813	-2.84088	-1.01032	0.37045	0.748537
Bglap	NM_013414	chr2:187741770-187742748	0	0	0	0	1	1	0	0	0	0	1	1	0	0	0	0	1	1	0	0	0	0	1	1
Bgn	NM_017087	chrX:157319041-157331204	4.26562	4.54792	0.0924511	0.131594	0.8541	0.942826	4.11689	7.04826	0.775713	1.117	0.10605	0.314025	4.41519	5.40476	0.291754	0.362801	0.64265	0.846823	6.77958	5.28042	-0.360542	-0.494793	0.49815	0.80842
Bhlha15	NM_012863	chr12:12403384-12407561	0.127036	0.0353412	-1.84581	0	1	1	0.122386	0	#NAME?	0	1	1	0.0343762	0	#NAME?	0	1	1	0	0	0	0	1	1
Bhlhb9	NM_207611	chrX:106390758-106393457	7.43608	13.1306	0.820315	1.77846	0.01485	0.13081	7.17012	8.31443	0.213621	0.41895	0.5531	0.738664	12.7277	10.8784	-0.226498	-0.481713	0.5101	0.77878	7.9996	10.6129	0.407817	0.790206	0.27585	0.694564
Bhlhe22	NM_001108940	chr2:102685512-102688624	14.4135	18.256	0.34095	0.896031	0.19695	0.543357	13.9038	18.4771	0.410261	1.08352	0.1205	0.336419	17.7073	15.6045	-0.182387	-0.440756	0.5334	0.789272	17.7561	15.2253	-0.221843	-0.546062	0.44095	0.780718
Bhlhe23	NM_001109211	chr3:176279996-176282211	0.148655	0.0895607	-0.731032	0	1	1	0.143268	0.00595738	-4.58789	0	1	1	0.0871172	0.239443	1.45866	0	1	1	0.00574462	0.234236	5.34961	0	1	1
Bhlhe40	NM_053328	chr4:140703618-140709319	6.34747	2.80571	-1.17782	-1.42425	0.06025	0.293669	6.12547	5.51697	-0.150944	-0.212305	0.76375	0.872145	2.72317	10.3879	1.93155	2.21374	0.00895	0.110226	5.30538	10.1487	0.935764	1.29034	0.07575	0.472304
Bhmt	NM_030850	chr2:23236572-23256158	3.9403	0.97414	-2.0161	-1.25265	0.0673	0.311669	3.80585	3.87052	0.0243091	0.0206746	0.9768	0.985289	0.942681	3.1258	1.72938	0.939182	0.15565	0.513535	3.72572	3.04862	-0.289363	-0.202186	0.7667	0.922407
Bhmt2	NM_001014256	chr2:23272325-23289266	0	0	0	0	1	1	0	0	0	0	1	1	0	0	0	0	1	1	0	0	0	0	1	1
Bicc1	NM_001108531	chr20:18780604-18938511	0.940455	0.820471	-0.196906	-0.116435	0.8671	0.948637	0.908129	1.47244	0.697241	0.423689	0.5679	0.748242	0.796751	2.14568	1.42923	0.996861	0.17575	0.53774	1.41476	2.09256	0.564714	0.438573	0.48615	0.804394
Bicd1	NM_001108653	chr4:184019086-184165540	6.01167	4.48657	-0.422151	-0.770935	0.2678	0.608523	5.79855	5.40233	-0.10211	-0.190025	0.79465	0.890345	4.35427	4.44763	0.0306066	0.046619	0.94565	0.981727	5.19758	4.33738	-0.261014	-0.415664	0.55465	0.833344
Bicd2	NM_001033674	chr17:15673648-15718035	0.691633	0.278544	-1.3121	-0.707441	0.4337	0.733641	0.66748	0.273395	-1.28774	-0.598346	0.43805	0.65359	0.270522	0.075614	-1.83902	0	1	1	0.263138	0.0739659	-1.83089	0	1	1
Bicd2	NM_198765	chr17:15673648-15718035	17.3676	12.6097	-0.461856	-1.28958	0.069	0.315298	16.7619	12.0939	-0.470906	-1.28448	0.06855	0.241325	12.2329	14.2529	0.220483	0.534098	0.44835	0.744961	11.6243	13.9117	0.259147	0.614904	0.38135	0.754945
Bid	NM_022684	chr4:153443219-153465247	1.51197	2.06554	0.45009	0.250235	0.5584	0.806512	1.46209	1.05659	-0.468617	-0.215201	0.54995	0.735882	2.00771	0.775029	-1.37323	-0.657177	0.327	0.662809	1.01886	0.756752	-0.429063	-0.17526	0.61745	0.861867
Bik	NM_053704	chr7:124391431-124410447	0.235882	0.235183	-0.00428179	0	1	1	0.227329	0	#NAME?	0	1	1	0.227559	0	#NAME?	0	1	1	0	0	0	0	1	1
Bin1	NM_053959	chr18:25163647-25222136	170.923	172.685	0.0147961	0.0626645	0.9315	0.975706	165.034	185.229	0.166546	0.747929	0.3199	0.551498	167.624	188.67	0.170636	0.678399	0.35305	0.682161	178.013	184.205	0.0493353	0.208818	0.782	0.928663
Bin2	NM_001012223	chr7:142273831-142300382	4.89696	5.60237	0.194149	0.209367	0.77905	0.910877	4.73156	8.20763	0.794649	0.939842	0.208	0.45665	5.43841	9.97383	0.874963	1.01034	0.1423	0.491483	7.87912	9.73723	0.305476	0.400367	0.5998	0.85425
Bin2a	NM_001009524	chr8:27935384-27973980	0	0	0	0	1	1	0	0	0	0	1	1	0	0.975013	inf	#NAME?	5e-05	0.0020606	0	0.953827	inf	#NAME?	5e-05	0.00359193
Bin3	NM_001013186	chr15:51799337-51818697	12.8285	12.481	-0.0396199	-0.061933	0.9296	0.975288	12.3828	15.702	0.342617	0.544466	0.45455	0.66667	12.1059	10.3733	-0.222835	-0.286515	0.692	0.872707	15.0777	10.1258	-0.574385	-0.766606	0.2622	0.683481
Birc2	NM_021752	chr8:6014013-6034587	8.31194	10.961	0.399119	0.800117	0.2561	0.599888	8.02172	9.0908	0.180496	0.329012	0.6399	0.796485	10.6349	10.204	-0.0596698	-0.11057	0.8818	0.955447	8.73866	9.95825	0.188479	0.325005	0.6376	0.870178
Birc3	NM_023987	chr8:6048589-6063975	0.0113408	0.213824	4.23683	0	1	1	0.0109692	0.0733885	2.74209	0	1	1	0.20753	0.0182563	-3.50686	0	1	1	0.0707686	0.0177776	-1.99305	0	1	1
Birc5	NM_022274	chr10:106856096-106864418	4.98816	12.2356	1.29451	1.12917	0.11395	0.416481	4.81153	11.7033	1.28235	1.06781	0.098	0.299415	11.8524	24.9654	1.07475	1.17885	0.0703	0.363857	11.2567	24.3535	1.11335	1.13874	0.11065	0.53913
Birc6	NM_001170596	chr6:21900762-22092484	4.01677	2.78871	-0.526436	-1.39107	0.05015	0.263784	3.87401	2.04948	-0.918567	-2.18025	0.0025	0.0232969	2.70395	3.48986	0.368102	0.849032	0.21995	0.586617	1.96977	3.4064	0.79022	1.64436	0.02425	0.296799
Birc7	NM_001305210	chr3:176439074-176443857	1.07863	4.76825	2.14426	1.46801	0.04995	0.263231	1.04202	1.49293	0.518759	0.312633	0.6594	0.809308	4.63109	7.67309	0.728455	0.653147	0.3576	0.686533	1.43368	7.4884	2.38493	1.72437	0.02705	0.317625
Bivm	NM_001305447	chr9:50885812-50921133	4.03024	4.50636	0.161097	0.257975	0.7077	0.881147	3.88676	5.66479	0.543455	0.881012	0.2117	0.459755	4.37375	2.80927	-0.638678	-0.784792	0.2648	0.619516	5.4527	2.74136	-0.992079	-1.29657	0.07645	0.473605
Blcap	NM_133582	chr3:154040164-154042099	74.4084	76.3353	0.0368859	0.147519	0.84715	0.940369	71.8164	43.4139	-0.726156	-2.6841	0.0003	0.00429939	74.0831	50.5633	-0.551054	-1.88015	0.011	0.125654	41.7451	49.3738	0.242139	0.758879	0.30405	0.713469
Bles03	NM_001024233	chr1:220806562-220808814	74.7589	64.3937	-0.215327	-0.684971	0.35045	0.674796	72.1619	86.5511	0.262315	0.845735	0.2608	0.501234	62.5097	47.0321	-0.410435	-1.02694	0.1509	0.503994	83.1826	45.894	-0.857977	-2.21911	0.00285	0.0918192
Bles03	NM_001243534	chr1:220806562-220808814	0.869095	3.3221	1.93451	0.610919	0.3428	0.668109	0.837452	2.70387	1.69095	0.451079	0.56305	0.745245	3.2228	1.90283	-0.760168	-0.29783	0.6475	0.850206	2.60667	1.86058	-0.486456	-0.144442	0.82295	0.943002
Blk	NM_001025751	chr15:46555575-46593570	0.352103	0	#NAME?	0	1	1	0.339214	0	#NAME?	0	1	1	0	0.0449408	inf	0	1	1	0	0.0437627	inf	0	1	1
Blmh	NM_001034163	chr10:63197366-63240447	30.3553	26.5677	-0.192277	-0.52051	0.4553	0.746452	29.2887	26.5286	-0.142792	-0.372893	0.59565	0.767847	25.7656	25.2699	-0.0280283	-0.0654709	0.92475	0.973074	25.5159	24.6686	-0.0487224	-0.11093	0.8749	0.960521
Blnk	NM_001025767	chr1:260187023-260254490	4.49615	11.6468	1.37317	1.81403	0.01295	0.121288	4.34249	7.96959	0.875984	1.06983	0.14195	0.369761	11.2905	8.19727	-0.4619	-0.647917	0.3545	0.683474	7.65826	8.00768	0.0643681	0.081433	0.9114	0.975229
Bloc1s1	NM_001105941	chr7:3342629-3346238	493.186	798.59	0.695324	2.51606	0.0004	0.0106345	476.278	1008.22	1.08194	4.0583	5e-05	0.000964063	774.75	720.83	-0.104072	-0.368447	0.60235	0.824555	968.837	703.681	-0.461332	-1.72973	0.0191	0.264881
Bloc1s2	NM_001037349	chr1:263913900-263920956	168.942	227.096	0.426774	1.43527	0.0403	0.232805	163.042	212.385	0.381433	1.24582	0.0818	0.269972	220.2	191.368	-0.202461	-0.639861	0.3622	0.690251	204.25	186.723	-0.129436	-0.402834	0.5635	0.837502
Bloc1s4	NM_001100766	chr14:79013807-79015108	52.8904	74.288	0.490123	1.3631	0.0568	0.283105	51.0273	61.9103	0.278911	0.756807	0.28265	0.51703	72.0759	73.3885	0.0260375	0.069847	0.91885	0.970262	59.4885	71.6305	0.267964	0.714356	0.3301	0.728099
Bloc1s5	NM_001107347	chr17:26808329-26833247	23.1284	25.8108	0.158307	0.362532	0.60455	0.828409	22.3224	24.7674	0.149946	0.324849	0.64605	0.800681	25.0507	22.7883	-0.136558	-0.274796	0.6967	0.874913	23.8124	22.2364	-0.0987951	-0.191257	0.7856	0.929869
Bloc1s6	NM_001025714	chr3:114869477-114880217	4.37349	3.88448	-0.171064	-0.223485	0.75805	0.904641	4.22065	4.06693	-0.0535248	-0.0656077	0.929	0.958939	3.77081	3.10715	-0.279279	-0.285764	0.6898	0.871252	3.91639	3.03463	-0.368001	-0.353656	0.60025	0.85425
Blvra	NM_053850	chr3:119561305-119577791	76.7213	92.0456	0.262722	0.726481	0.30835	0.642629	74.0423	65.7283	-0.171835	-0.432061	0.5348	0.725968	89.2788	85.1245	-0.068743	-0.174058	0.7991	0.92188	63.1836	83.0376	0.394214	0.906085	0.1983	0.649727
Blvrb	NM_001106236	chr1:84256062-84273726	85.8134	106.74	0.314829	0.818732	0.2539	0.59879	82.864	92.8663	0.16441	0.410129	0.5777	0.754751	103.57	55.0231	-0.912502	-1.87677	0.01065	0.122859	89.2485	53.7085	-0.732678	-1.44759	0.0517	0.402939
Blzf1	NM_001017494	chr13:82592169-82607379	5.19466	4.80117	-0.113644	-0.158202	0.8176	0.928969	5.008	2.3653	-1.08221	-1.12818	0.1275	0.346232	4.66282	6.67255	0.517037	0.652458	0.36115	0.688796	2.27647	6.50513	1.51478	1.36491	0.08215	0.487301
Bmf	NM_139258	chr3:110306066-110324084	0	0.621836	inf	#NAME?	0.00015	0.00511574	0	0.140506	inf	0	1	1	0.601686	0	#NAME?	#NAME?	0.08165	0.392048	0.13549	0	#NAME?	0	1	1
Bmi1	NM_001107368	chr17:85364482-85368214	3.28133	2.64436	-0.311365	-0.225202	0.73795	0.896235	3.16599	0.764342	-2.05036	-1.10534	0.18315	0.42609	2.56394	0.580898	-2.142	-1.01202	0.301	0.644484	0.733633	0.566548	-0.372861	-0.156923	0.58555	0.846631
Bmp1	NM_031323	chr15:52166400-52210746	3.91557	4.07332	0.056981	0.0776551	0.91385	0.969195	3.77988	9.21767	1.28606	1.91949	0.0171	0.096284	3.95329	4.88442	0.305133	0.393184	0.568	0.808012	8.85315	4.76922	-0.892438	-1.35748	0.07555	0.472304
Bmp10	NM_001031824	chr4:119224905-119230534	0	0	0	0	1	1	0	0	0	0	1	1	0	0	0	0	1	1	0	0	0	0	1	1
Bmp15	NM_021670	chrX:17016830-17021894	0	0	0	0	1	1	0	0	0	0	1	1	0	0	0	0	1	1	0	0	0	0	1	1
Bmp2	NM_017178	chr3:126336184-126344701	0.431454	1.06172	1.29913	0.608188	0.47895	0.760426	0.417216	0.647932	0.63505	0.243494	0.60445	0.772844	1.03011	0.618912	-0.734989	-0.315026	0.64475	0.848057	0.624656	0.605437	-0.0450857	-0.015559	0.82765	0.944323
Bmp3	NM_017105	chr14:12362911-12387572	1.43166	0.83645	-0.775339	-0.492908	0.5542	0.804346	1.3845	0.718137	-0.947032	-0.541536	0.46455	0.674914	0.81282	1.53365	0.915965	0.504186	0.477	0.761047	0.69127	1.49722	1.11496	0.556772	0.3663	0.746937
Bmp4	NM_012827	chr15:20776215-20779802	18.2809	10.7155	-0.770638	-1.15888	0.107	0.404945	17.6526	12.7195	-0.472845	-0.723369	0.3212	0.552764	10.4062	13.5169	0.377326	0.474044	0.51245	0.77918	12.2245	13.2029	0.111083	0.144515	0.8501	0.951724
Bmp5	NM_001108168	chr8:82669465-82950273	0.105601	0.223316	1.08047	0	1	1	0.101532	0.027438	-1.88769	0	1	1	0.21604	0	#NAME?	0	1	1	0.0263658	0	#NAME?	0	1	1
Bmp6	NM_013107	chr17:26955141-27112820	1.54551	3.24719	1.07111	0.611674	0.36485	0.687154	1.49081	0.1314	-3.50406	-1.40874	0.23585	0.481265	3.15358	3.42548	0.119317	0.093826	0.91235	0.967129	0.126041	3.35044	4.73239	2.1795	0.21725	0.665443
Bmp7	NM_001191856	chr3:170879971-170955820	2.42268	0.627813	-1.9482	-1.20859	0.08315	0.351532	2.34051	0.363538	-2.68664	-1.92603	0.2869	0.520639	0.608278	1.09815	0.852276	0.453193	0.4547	0.750094	0.348746	1.07416	1.62296	1.03406	0.4161	0.770265
Bmp8a	NM_001109432	chr5:141007461-141033511	0.0438234	0.0129016	-1.76415	0	1	1	0.0422506	0	#NAME?	0	1	1	0.0124836	0	#NAME?	0	1	1	0	0	0	0	1	1
Bmper	NM_001135799	chr8:24369915-24615479	1.08758	1.34746	0.309127	0.27199	0.6814	0.865568	1.04833	3.17976	1.60082	1.57952	0.0199	0.106233	1.30498	3.72238	1.5122	1.49315	0.02805	0.220153	3.06084	3.63562	0.248274	0.323076	0.637	0.870178
Bmpr1a	NM_030849	chr16:10758525-10802512	1.05564	1.82808	0.792215	0.659358	0.35705	0.679592	1.01679	0.263325	-1.94911	-0.982006	0.12895	0.348474	1.76943	0.47751	-1.88968	-1.28167	0.0776	0.382123	0.252607	0.465735	0.882612	0	1	1
Bmpr1b	NM_001024259	chr2:247403820-247437419	0.0230432	0	#NAME?	0	1	1	0.0221816	2.22175	6.64619	1.68288	0.19835	0.446735	0	0.057396	inf	0	1	1	2.13482	0.0558914	-5.25535	-1.73685	0.23315	0.678537
Bmpr2	NM_080407	chr9:66568073-66676494	5.11803	4.22341	-0.27718	-0.453751	0.50865	0.776864	4.93283	5.93865	0.267717	0.452926	0.5073	0.70622	4.09787	4.19293	0.0330817	0.045049	0.94815	0.982924	5.70945	4.08752	-0.482125	-0.695979	0.31995	0.721775
Bms1	NM_001100751	chr4:150433566-150471783	9.46338	7.65846	-0.305301	-0.599808	0.38975	0.704791	9.13416	11.844	0.374814	0.761473	0.2794	0.514516	7.4255	12.5478	0.75687	1.38099	0.0511	0.307824	11.3892	12.2541	0.105589	0.206406	0.76715	0.922407
Bmx	NM_001109016	chrX:31976230-32046326	0.303341	0	#NAME?	0	1	1	0.291932	0	#NAME?	0	1	1	0	0.0799266	inf	0	1	1	0	0.0781937	inf	0	1	1
Bmyc	NM_001013163	chr3:2916661-2917421	215.881	270.355	0.324619	1.27107	0.128	0.438204	208.443	191.279	-0.123969	-0.515588	0.59505	0.767327	262.646	194.392	-0.434153	-1.64329	0.0722	0.368037	183.697	189.927	0.0481201	0.197094	0.85495	0.953334
Bnc1	NM_001108916	chr1:143793052-143818706	0	0	0	0	1	1	0	0	0	0	1	1	0	0	0	0	1	1	0	0	0	0	1	1
Bnc2	NM_001106666	chr5:102415846-102743417	0.37147	0.354789	-0.0662868	0	1	1	0.358182	0.147966	-1.27543	0	1	1	0.344761	0.119485	-1.52876	0	1	1	0.142187	0.116355	-0.28926	0	1	1
Bnip1	NM_080897	chr10:16677076-16689321	45.6056	40.0664	-0.186819	-0.404736	0.567	0.809269	44.0446	41.7046	-0.0787571	-0.165687	0.81335	0.899519	38.8728	46.4122	0.255744	0.4931	0.48825	0.767344	40.078	45.3155	0.177196	0.333494	0.6391	0.870298
Bnip2	NM_001106835	chr8:76400372-76413769	6.00307	2.95936	-1.02042	-0.861009	0.21855	0.567258	5.78881	5.87927	0.0223713	0.0236059	0.9705	0.98221	2.86882	2.4569	-0.223621	-0.128287	0.84475	0.940342	5.65179	2.39707	-1.23744	-0.778265	0.2689	0.690341
Bnip3	NM_053420	chr1:211248097-211265282	24.2104	36.4732	0.591206	1.66811	0.0206	0.156989	23.3313	33.7304	0.531782	1.4538	0.04305	0.179408	35.3822	27.9228	-0.341576	-0.883658	0.21595	0.581405	32.4515	27.2476	-0.252156	-0.644387	0.36375	0.746475
Bnip3l	NM_080888	chr15:43643896-43667029	42.4804	62.7234	0.562207	2.12642	0.0027	0.0434451	40.9279	55.1391	0.429993	1.65413	0.02135	0.111735	60.8388	50.8726	-0.258104	-0.932422	0.19375	0.557677	53.0604	49.6312	-0.0963884	-0.356119	0.6302	0.866591
Bnipl	NM_001128187	chr2:196304491-196531344	0	0	0	0	1	1	0	0	0	0	1	1	0	0	0	0	1	1	0	0	0	0	1	1
Bod1	NM_001013854	chr10:16259727-16266068	69.5282	99.5671	0.518071	1.60542	0.02325	0.168979	67.0908	59.427	-0.174996	-0.49636	0.4904	0.69289	96.6201	88.2216	-0.131192	-0.396725	0.5857	0.817792	57.1364	86.171	0.592792	1.63135	0.02435	0.297394
Bod1	NR_073160	chr10:16259727-16266068	1.4056	3.9793	1.50133	0.644296	0.3854	0.701807	1.35746	2.64276	0.961139	0.410185	0.62325	0.786242	3.85948	1.90192	-1.02095	-0.495217	0.5443	0.796708	2.54376	1.85784	-0.453333	-0.195993	0.77345	0.924778
Bok	NM_017312	chr9:100829592-100840498	69.5718	49.0073	-0.505504	-1.5835	0.0495	0.261423	67.164	38.4228	-0.805723	-2.45362	0.00345	0.0295862	47.5884	39.7512	-0.259613	-0.677267	0.4126	0.724509	36.926	38.8468	0.0731601	0.185258	0.8311	0.945374
Bola1	NM_001071776	chr2:198338114-198339130	106.62	168.308	0.658635	1.91603	0.01105	0.110481	102.907	178.589	0.7953	2.33338	0.0038	0.0320024	163.406	128.646	-0.345048	-0.953595	0.2125	0.578117	171.58	125.665	-0.449296	-1.2869	0.10735	0.533567
Bola3	NM_001106601	chr4:115046692-115056140	78.7219	100.279	0.349185	1.11717	0.1174	0.421919	75.9906	99.9435	0.395292	1.23199	0.0873	0.279775	97.3127	88.5448	-0.13622	-0.396749	0.57415	0.810695	96.0877	86.4188	-0.153007	-0.442348	0.52515	0.819356
Boll	NM_001113370	chr9:61915970-61975640	0	0	0	0	1	1	0	0	0	0	1	1	0	0	0	0	1	1	0	0	0	0	1	1
Boll	NM_001113370_1	chr9:64513671-64573825	0	0	0	0	1	1	0	0	0	0	1	1	0	0	0	0	1	1	0	0	0	0	1	1
Bop1	NM_001024250	chr7:117514528-117538342	19.9756	26.1119	0.386466	0.941369	0.197	0.543357	19.2832	25.7012	0.414486	0.981726	0.1806	0.423265	25.3567	28.8	0.183704	0.432271	0.5724	0.809608	24.6994	28.1297	0.18762	0.43686	0.5689	0.841123
Bora	NM_001013997	chr15:83442360-83463737	0.155809	0.271694	0.8022	0	1	1	0.150761	0.0836443	-0.849928	0	1	1	0.263492	0.650736	1.30431	0.623386	0.34765	0.679061	0.080599	0.635654	2.97941	1.11701	0.2634	0.684142
Bpgm	NM_199382	chr4:61912209-61940697	147.653	114.332	-0.368978	-1.39568	0.0513	0.266596	142.49	115.589	-0.301856	-1.1388	0.1069	0.315744	110.932	137.398	0.308684	1.06212	0.1366	0.483804	111.175	134.124	0.270732	0.928898	0.19335	0.645296
Bphl	NM_001037206	chr17:31498876-31535172	26.7509	21.7078	-0.301374	-0.541396	0.42965	0.729576	25.8074	9.24987	-1.48028	-2.08235	0.0076	0.0530011	21.0494	17.6069	-0.257639	-0.36898	0.5915	0.820293	8.87979	17.1879	0.952798	1.05138	0.16105	0.608727
Bpi	NM_001004079	chr3:154741636-154768540	0	0	0	0	1	1	0	0	0	0	1	1	0	0	0	0	1	1	0	0	0	0	1	1
Bpifa1	NM_172031	chr3:149624866-149630610	0	1.00475	inf	#NAME?	0.1101	0.410378	0	0	0	0	1	1	0.977296	0	#NAME?	#NAME?	0.12145	0.465601	0	0	0	0	1	1
Bpifa2	NM_052808	chr3:149493654-149501613	0	0	0	0	1	1	0	0	0	0	1	1	0	0	0	0	1	1	0	0	0	0	1	1
Bpifa2f	NM_080775	chr3:149524670-149533248	0	0	0	0	1	1	0	0	0	0	1	1	0	0	0	0	1	1	0	0	0	0	1	1
Bpifa3	NM_001109588	chr3:149606942-149616757	0	0	0	0	1	1	0	0	0	0	1	1	0	0	0	0	1	1	0	0	0	0	1	1
Bpifa5	NM_001107792	chr3:149643480-149649398	0.780682	0	#NAME?	#NAME?	0.0157	0.135441	0.752664	1.41083	0.906463	0.446124	0.35915	0.588033	0	0.0659922	inf	0	1	1	1.35629	0.0642647	-4.39949	-1.34731	0.2325	0.678537
Bpifb1	NM_001077680	chr3:149668194-149702397	0	0.253722	inf	0	1	1	0	0	0	0	1	1	0.246771	0	#NAME?	0	1	1	0	0	0	0	1	1
Bpifb2	NM_001106531	chr3:149358880-149377867	0	0	0	0	1	1	0	0	0	0	1	1	0	0	0	0	1	1	0	0	0	0	1	1
Bpifb3	NM_001109208	chr3:149401889-149416506	0	0	0	0	1	1	0	0	0	0	1	1	0	0	0	0	1	1	0	0	0	0	1	1
Bpifb4	NM_001109209	chr3:149424391-149449350	0.123581	0	#NAME?	0	1	1	0.119397	0.080181	-0.574441	0	1	1	0	0	0	0	1	1	0.0773192	0	#NAME?	0	1	1
Bpifb6	NM_001107791	chr3:149391928-149396130	0	0	0	0	1	1	0	0	0	0	1	1	0	0	0	0	1	1	0	0	0	0	1	1
Bpifc	NM_001106773	chr7:23854845-23911953	0	0	0	0	1	1	0	0	0	0	1	1	0	0	0	0	1	1	0	0	0	0	1	1
Bpnt1	NM_171990	chr13:103268087-103292847	60.1352	59.8166	-0.00766472	-0.0254767	0.9724	0.988951	57.9838	72.3384	0.319112	1.07033	0.1266	0.344826	58.0156	72.8703	0.328889	1.02048	0.1496	0.502409	69.5782	71.1089	0.0313939	0.099522	0.88775	0.966464
Brap	NM_001271194	chr12:40381892-40417764	13.8249	17.9212	0.374395	0.959003	0.1706	0.506537	13.3444	16.8785	0.338951	0.849583	0.24475	0.488375	17.3807	20.3014	0.224087	0.548991	0.4338	0.736664	16.2227	19.8211	0.289016	0.709454	0.32745	0.726787
Brca1	NM_012514	chr10:89395847-89454681	0.114533	0.0402553	-1.50852	0	1	1	0.110238	0	#NAME?	0	1	1	0.0391429	0	#NAME?	0	1	1	0	0	0	0	1	1
Brca2	NM_031542	chr12:504006-544754	0.468379	0.209935	-1.15773	0	1	1	0.452981	0.311755	-0.539038	0	1	1	0.203891	0.367021	0.848064	0	1	1	0.300202	0.358131	0.254557	0	1	1
Brcc3	NM_001127300	chr9:9863379-9865920	13.4403	14.0515	0.0641545	0.144945	0.83365	0.934865	12.9592	9.12586	-0.505946	-1.01596	0.14405	0.373275	13.62	9.14223	-0.575105	-1.06474	0.11825	0.460023	8.77468	8.92639	0.0247311	0.041376	0.9494	0.986322
Brd1	NM_001108103	chr7:129676119-129724303	23.5933	17.872	-0.400675	-1.27392	0.0696	0.31631	22.7588	17.6638	-0.365627	-1.12184	0.1114	0.323814	17.3381	28.7754	0.730887	2.14638	0.00335	0.0574574	16.9989	28.0854	0.724374	2.08741	0.0032	0.098434
Brd2	NM_212495	chr20:3910561-3917769	0.102522	0.0312008	-1.71628	0	1	1	0.099015	0.069011	-0.520821	0	1	1	0.0302815	0.121345	2.00261	0	1	1	0.0663509	0.118467	0.836304	0	1	1
Brd2	NM_212495_1	chr20:5262122-5269330	0.0618168	0.0495589	-0.318856	0	1	1	0.0596272	0.0561172	-0.0875285	0	1	1	0.0481369	0.0722043	0.584941	0	1	1	0.0538684	0.0705012	0.38821	0	1	1
Brd3	NM_001108575	chr3:5997314-6017597	15.1772	18.2599	0.26677	0.70062	0.33585	0.661967	14.6593	15.9318	0.120096	0.307089	0.68445	0.82513	17.718	13.9057	-0.349534	-0.803106	0.277	0.628226	15.3067	13.581	-0.172572	-0.391834	0.6058	0.856319
Brd4	NM_001100903	chr7:14222100-14303055	20.3876	27.0168	0.406166	1.62113	0.03175	0.201854	19.691	25.8731	0.393918	1.56234	0.03895	0.168057	26.2306	23.7898	-0.140912	-0.527057	0.4854	0.765729	24.8701	23.2336	-0.0982034	-0.368005	0.61695	0.861758
Brd7	NM_001108440	chr19:19672855-19701484	37.5615	51.7009	0.460935	1.27985	0.0752	0.331208	36.2383	48.5658	0.422422	1.11548	0.11565	0.32995	50.1336	37.1295	-0.433211	-1.06868	0.13345	0.479439	46.6997	36.2443	-0.365658	-0.869795	0.2099	0.657024
Brd8	NM_001008509	chr18:27398937-27419287	8.43153	11.1777	0.406751	0.849499	0.2431	0.589874	8.14444	7.08282	-0.201492	-0.372611	0.6014	0.771	10.8421	10.5385	-0.0409752	-0.0791529	0.9099	0.966817	6.80939	10.2919	0.595908	1.03345	0.1612	0.609055
Brd9	NM_001107453	chr1:31939611-31967859	29.4846	45.8705	0.637604	1.83769	0.01035	0.105649	28.4493	42.4622	0.577784	1.5865	0.02645	0.129467	44.5001	31.7366	-0.487659	-1.28753	0.06685	0.354074	40.8155	30.965	-0.398482	-1.01464	0.149	0.591597
Brdt	NM_001012031	chr14:3437875-3462613	0	0	0	0	1	1	0	0	0	0	1	1	0	0	0	0	1	1	0	0	0	0	1	1
Bre	NM_199270	chr6:25666654-26051229	28.3243	28.5841	0.0131693	0.0306159	0.9649	0.986259	27.3411	28.6773	0.0688406	0.151329	0.8317	0.910216	27.7335	27.1203	-0.0322563	-0.0660362	0.9231	0.972338	27.5874	26.4815	-0.0590259	-0.116013	0.87195	0.959195
Brf1	NM_001106761	chr6:137765121-137808303	27.6949	21.0034	-0.398999	-0.681117	0.3343	0.661475	26.7381	24.4379	-0.129776	-0.241901	0.7349	0.855593	20.3677	30.3072	0.57338	0.92652	0.18665	0.549444	23.4746	29.5964	0.334323	0.593762	0.43235	0.777993
Brf2	NM_001024773	chr16:69089954-69094676	12.3915	9.8199	-0.33557	-0.566624	0.4128	0.719642	11.9683	13.2174	0.143227	0.254682	0.73885	0.857891	9.52238	7.52643	-0.339357	-0.436256	0.51835	0.782186	12.7043	7.34506	-0.790472	-1.0752	0.11535	0.544546
Bri3	NM_001009604	chr12:12322246-12330929	41.3805	54.5683	0.399113	0.871342	0.23905	0.586002	39.9428	58.4459	0.549166	1.2272	0.1149	0.329092	52.9961	66.8969	0.336052	0.745262	0.34215	0.675424	56.1523	65.356	0.218976	0.525579	0.5392	0.825465
Bri3bp	NM_001017487	chr12:36576017-36587839	9.61392	11.7131	0.284926	0.372997	0.5911	0.823329	9.28552	11.6049	0.321681	0.423082	0.57085	0.749925	11.3573	6.98375	-0.701551	-0.692722	0.2565	0.613276	11.1537	6.80994	-0.711808	-0.674415	0.3183	0.720555
Brinp1	NM_080482	chr5:84919844-85066674	50.487	38.6384	-0.385876	-1.19632	0.091	0.371171	48.7418	54.0777	0.149874	0.47029	0.4968	0.697567	37.5095	52.9136	0.496382	1.38191	0.05775	0.32952	52.0123	51.6375	-0.010433	-0.0300339	0.96485	0.98984
Brinp2	NM_173115	chr13:75948678-76049363	18.4967	24.4336	0.401599	1.26752	0.09215	0.373906	17.8616	28.9247	0.695443	2.17655	0.00415	0.034285	23.7306	35.0037	0.560761	1.75701	0.0228	0.193958	27.7963	34.1738	0.297997	0.962296	0.19915	0.651405
Brinp3	NM_173121	chr13:63526485-63959332	6.02886	7.40825	0.297249	0.52288	0.4465	0.741272	5.81502	3.96619	-0.552031	-0.778147	0.26565	0.504571	7.18508	4.30963	-0.737439	-1.03525	0.1286	0.472695	3.8111	4.20122	0.140599	0.161763	0.81465	0.939312
Brix1	NM_001029915	chr2:60450546-60461425	14.5737	12.4369	-0.228742	-0.518031	0.4673	0.752681	14.0402	21.5153	0.615795	1.54234	0.05175	0.203102	12.058	15.9	0.399044	0.815665	0.2689	0.622752	20.727	15.505	-0.418775	-1.00051	0.2183	0.666133
Brk1	NM_001195476	chr4:145559205-145574438	228.479	249.708	0.128183	0.518757	0.47545	0.757431	220.43	234.69	0.0904371	0.367874	0.6145	0.779778	242.385	213.682	-0.181835	-0.673304	0.3498	0.6795	225.651	208.592	-0.113408	-0.422749	0.5588	0.835812
Brms1	NM_001009605	chr1:220325351-220334616	0.638154	0.718008	0.170094	0.077293	0.1823	0.523324	0.615795	0.857153	0.477102	0.227341	0.23805	0.483231	0.696561	0.468974	-0.570742	-0.249259	0.46475	0.755664	0.823059	0.457987	-0.84569	-0.385841	0.49785	0.80842
Brms1	NM_001009605_1	chr1:220418515-220427780	0.542543	0.575704	0.0855893	0	1	1	0.523555	0.817902	0.643587	0.30065	0.3568	0.586397	0.558566	0.336289	-0.732025	0	1	1	0.78521	0.328519	-1.2571	-0.55688	0.5666	0.840058
Brms1l	NM_001106731	chr6:76675428-76708261	1.98566	2.25822	0.185567	0.184886	0.79765	0.920935	1.91489	3.40755	0.831471	0.842963	0.24725	0.490774	2.19054	3.25788	0.572645	0.568383	0.4251	0.731756	3.28054	3.1798	-0.0449996	-0.0457979	0.95005	0.986322
Brox	NM_001025669	chr13:101677900-101697684	10.0033	10.2359	0.0331726	0.0779633	0.91505	0.969782	9.63992	11.5723	0.263583	0.611343	0.39145	0.615697	9.92817	11.9129	0.262929	0.564092	0.4064	0.721045	11.1336	11.6329	0.0632946	0.137345	0.8394	0.947925
Brpf1	NM_001191572	chr4:145264452-145280887	11.3834	11.8146	0.0536309	0.133646	0.85145	0.942179	10.9966	9.92834	-0.147427	-0.351803	0.6253	0.787535	11.4577	16.204	0.500029	1.18343	0.0961	0.423889	9.54407	15.8257	0.729593	1.65728	0.02525	0.303802
Brpf3	NM_001107615	chr20:6054197-6084155	1.38211	0.456777	-1.59731	-0.935175	0.1884	0.530422	1.33475	0.245953	-2.44012	-1.49472	0.034	0.153065	0.442644	0.0876056	-2.33705	0	1	1	0.236406	0.0856912	-1.46405	0	1	1
Brs3	NM_152845	chrX:159505231-159509610	0	0	0	0	1	1	0	0	0	0	1	1	0	0	0	0	1	1	0	0	0	0	1	1
Brsk1	NM_001127337	chr1:72692830-72727061	63.887	40.794	-0.647167	-1.86589	0.01085	0.108947	61.7122	33.0061	-0.902825	-2.63269	0.0017	0.0174358	39.5941	79.1032	0.998453	2.63892	0.0006	0.015655	31.7097	77.2555	1.28471	3.47012	5e-05	0.00359193
Bscl2	NM_001012171	chr1:225035955-225046137	46.3783	44.3253	-0.0653185	-0.169784	0.81435	0.927401	44.7823	57.4659	0.359776	0.95614	0.18875	0.433102	43.0087	58.0357	0.43231	1.0316	0.1496	0.502409	55.2298	56.6569	0.0368034	0.0916715	0.90095	0.970512
Bsdc1	NM_001106636	chr5:147661617-147689764	25.8276	30.5566	0.242573	0.708529	0.32305	0.652684	24.932	40.9259	0.715017	2.1194	0.00425	0.0348899	29.6492	33.2142	0.163805	0.449547	0.52605	0.784944	39.327	32.4366	-0.2779	-0.794603	0.2764	0.694789
Bsg	NM_001109882	chr7:12875535-12882753	0	1.54219	inf	#NAME?	0.2217	0.570741	0	0.964219	inf	#NAME?	0.2301	0.475659	1.49234	0	#NAME?	#NAME?	0.2059	0.569595	0.929821	0	#NAME?	#NAME?	0.21195	0.66016
Bsg	NM_012783	chr7:12875535-12882753	550.705	719.358	0.385431	1.70426	0.0187	0.148508	531.783	608.248	0.193821	0.96203	0.2172	0.464981	698.174	479.856	-0.540985	-2.25551	0.00205	0.0400488	584.392	468.513	-0.318846	-1.4811	0.0542	0.411446
Bsn	NM_019146	chr8:116873720-116965396	13.5185	8.54508	-0.661775	-2.52644	0.0007	0.0163772	13.0543	10.6082	-0.299341	-1.26304	0.1174	0.33218	8.29404	20.2302	1.28636	4.75296	5e-05	0.0020606	10.1907	19.7608	0.955389	4.01538	5e-05	0.00359193
Bsnd	NM_138979	chr5:126071848-126080647	0	0	0	0	1	1	0	0	0	0	1	1	0	0	0	0	1	1	0	0	0	0	1	1
Bspry	NM_022261	chr5:78334283-78356462	14.6255	14.7863	0.0157782	0.0320157	0.9649	0.986259	14.1184	11.2226	-0.331166	-0.595249	0.3982	0.62084	14.3514	12.817	-0.163128	-0.28365	0.69535	0.874756	10.7966	12.5131	0.212854	0.333324	0.62825	0.866037
Bst1	NM_030848	chr14:71798217-71814540	0.068535	0.821095	3.58264	1.12102	0.41785	0.722396	0.0662632	0	#NAME?	0	1	1	0.798547	0.998885	0.322941	0.145965	0.7479	0.897403	0	0.976239	inf	#NAME?	0.0284	0.32362
Bst2	NM_198134	chr16:19938783-19942353	10.1346	9.10974	-0.153803	-0.138734	0.8512	0.942179	9.78335	22.5481	1.20461	1.23701	0.0853	0.276388	8.84323	23.227	1.39316	1.30418	0.0839	0.397119	21.6609	22.6767	0.0661175	0.0798441	0.91785	0.976762
Bsx	NM_001191995	chr8:45061669-45065430	0.0338687	0	#NAME?	0	1	1	0.0326592	0	#NAME?	0	1	1	0	0	0	0	1	1	0	0	0	0	1	1
Btaf1	NM_001191917	chr1:255579473-255654932	1.93954	1.31595	-0.559609	-0.857934	0.2222	0.57091	1.87139	1.8825	0.00854027	0.0140998	0.98475	0.989986	1.2755	1.85509	0.540429	0.720926	0.27575	0.62792	1.81143	1.81247	0.000828236	0.00119382	0.99835	0.998882
Btbd1	NM_001011932	chr1:143609728-143647124	67.3498	59.1344	-0.187675	-0.709273	0.3159	0.64684	64.9609	55.7599	-0.220346	-0.838468	0.2253	0.471894	57.3515	59.8798	0.0622373	0.217246	0.7605	0.902462	53.6119	58.4315	0.124194	0.435125	0.53575	0.823639
Btbd10	NM_001014022	chr1:178138561-178196294	39.074	28.08	-0.476666	-1.40369	0.0489	0.259896	37.6995	33.2009	-0.183323	-0.543979	0.43815	0.653596	27.2333	29.1896	0.100086	0.248134	0.72405	0.887037	31.9334	28.5036	-0.163922	-0.412398	0.55335	0.832232
Btbd16	NM_001017464	chr1:201337459-201391246	1.07353	0.282332	-1.92689	-0.863723	0.34695	0.671373	1.03611	0.0125601	-6.36618	-1.71512	0.1557	0.390808	0.273518	0	#NAME?	0	1	1	0.0121117	0	#NAME?	0	1	1
Btbd17	NM_001134534	chr10:103308391-103340552	11.6502	18.7067	0.6832	1.59676	0.03525	0.215329	11.2435	7.884	-0.512094	-0.890237	0.1959	0.443176	18.1701	13.6563	-0.411994	-0.903405	0.26505	0.619743	7.58749	13.3388	0.81393	1.33163	0.06675	0.447036
Btbd3	NM_001107782	chr3:131351586-131357929	23.3119	21.1417	-0.140975	-0.37193	0.60655	0.829132	22.5013	22.3562	-0.00933372	-0.0240044	0.97405	0.983785	20.5159	21.5002	0.0676076	0.154961	0.82975	0.933749	21.4887	20.9795	-0.0346018	-0.077421	0.9141	0.975771
Btbd6	NM_001077683	chr6:137765121-137808303	60.1738	50.3287	-0.257753	-0.763645	0.27635	0.617171	58.1045	36.9609	-0.65265	-2.01026	0.0134	0.0813086	48.817	64.2784	0.39695	1.09534	0.12535	0.467527	35.5009	62.7683	0.82218	2.3512	0.00525	0.132291
Btbd7	NM_001108720	chr6:126661633-126710858	0.959397	0.922335	-0.0568369	-0.048341	0.94075	0.978561	0.92552	1.48967	0.686661	0.570149	0.4106	0.632008	0.895078	0.981664	0.133215	0.100897	0.8891	0.95724	1.4325	0.957218	-0.581618	-0.469406	0.49535	0.807728
Btbd9	NM_001013073	chr20:8901929-9249820	44.8044	26.8769	-0.737272	-1.90558	0.00735	0.0838832	43.2138	15.6814	-1.46244	-3.15293	0.0003	0.00429939	26.0559	32.0255	0.29761	0.650609	0.3525	0.681566	15.0695	31.2609	1.05273	1.95883	0.0074	0.162716
Btc	NM_022256	chr14:18231853-18270621	1.53132	0.815146	-0.909644	-0.349556	0.37265	0.691642	1.47793	0	#NAME?	#NAME?	0.0319	0.146023	0.789414	0.892968	0.177826	0.0576508	0.84815	0.941576	0	0.869561	inf	#NAME?	0.10545	0.528896
Btd	NM_001012047	chr16:7760639-7791286	7.08124	8.01967	0.17954	0.252139	0.70865	0.881421	6.83363	3.90819	-0.806151	-0.920229	0.20865	0.457098	7.77923	4.69663	-0.728002	-0.843788	0.29055	0.636223	3.75548	4.5928	0.290376	0.29295	0.7049	0.896906
Btf3	NM_001008309	chr2:28417315-28424425	152.882	233.505	0.611037	2.07422	0.0045	0.0601611	147.506	224.049	0.603037	2.02114	0.0057	0.0436739	226.538	157.87	-0.521016	-1.62453	0.02405	0.200211	215.499	154.021	-0.484558	-1.51867	0.03265	0.340024
Btg1	NM_017258	chr7:37812830-37815088	24.2965	35.406	0.543249	1.34674	0.05535	0.280296	23.4325	24.1054	0.0408439	0.0915524	0.8929	0.94022	34.3533	28.8208	-0.253337	-0.581887	0.4081	0.722126	23.1876	28.1293	0.278719	0.580965	0.4149	0.769398
Btg2	NM_017259	chr13:50913184-50916944	6.53484	6.01351	-0.119943	-0.202344	0.782	0.912255	6.30597	4.86466	-0.374377	-0.583839	0.4261	0.644289	5.83506	10.0855	0.789468	1.25878	0.07795	0.382792	4.67579	9.85327	1.07539	1.58927	0.0415	0.372952
Btg3	NM_019290	chr11:16873641-16889100	45.8886	52.8978	0.20507	0.568151	0.4226	0.726127	44.2653	48.3153	0.126303	0.339168	0.63695	0.794612	51.2999	38.6621	-0.408035	-0.983181	0.1665	0.52583	46.4929	37.7308	-0.301268	-0.703191	0.3268	0.726704
Btg4	NM_001013176	chr8:55504358-55508100	0.175375	0.410028	1.22528	0	1	1	0.169075	0	#NAME?	0	1	1	0.396693	0	#NAME?	0	1	1	0	0	0	0	1	1
Btk	NM_001007798	chrX:105360921-105390580	0.748434	0.302669	-1.30614	-0.605015	0.41955	0.724199	0.721272	1.04994	0.54169	0.29149	0.66755	0.814243	0.293124	0.816547	1.47802	0.609016	0.48455	0.765345	1.00952	0.798793	-0.337772	-0.156931	0.66425	0.879559
Btla	NM_213630	chr11:60525933-60546997	0	0	0	0	1	1	0	0	0	0	1	1	0	0	0	0	1	1	0	0	0	0	1	1
Btn1a1	NM_001170337	chr17:43900684-43908439	0	0	0	0	1	1	0	0	0	0	1	1	0	0	0	0	1	1	0	0	0	0	1	1
Btn3a2	NM_001166344	chr20:4240269-4279911	0	0	0	0	1	1	0	0	0	0	1	1	0	0	0	0	1	1	0	0	0	0	1	1
Btnl2	NM_053815	chr20:4143320-4154978	0	0	0	0	1	1	0	0	0	0	1	1	0	0	0	0	1	1	0	0	0	0	1	1
Btnl3	NM_001002803	chr20:4156857-4171887	0	0.528815	inf	0	1	1	0	0.793758	inf	#NAME?	5e-05	0.000964063	0.514256	0	#NAME?	0	1	1	0.76119	0	#NAME?	#NAME?	0.08585	0.494739
Btnl5	NM_001166351	chr20:2704374-2976332	0.0174472	0	#NAME?	0	1	1	0.0168058	0	#NAME?	0	1	1	0	0	0	0	1	1	0	0	0	0	1	1
Btnl7	NM_212488	chr20:2704374-2976332	0	0	0	0	1	1	0	0	0	0	1	1	0	0	0	0	1	1	0	0	0	0	1	1
Btnl7	NM_212488_1	chr20:2704374-2976332	0	0	0	0	1	1	0	0	0	0	1	1	0	0	0	0	1	1	0	0	0	0	1	1
Btnl7	NM_212488_2	chr20:2704374-2976332	0	0	0	0	1	1	0	0	0	0	1	1	0	0	0	0	1	1	0	0	0	0	1	1
Btnl8	NM_212489	chr20:2704374-2976332	0	0	0	0	1	1	0	0	0	0	1	1	0	0	0	0	1	1	0	0	0	0	1	1
Btrc	NM_001007148	chr1:265100137-265265927	20.3272	11.9702	-0.763963	-1.57753	0.02635	0.182284	19.6195	11.9551	-0.714664	-1.45299	0.0485	0.194914	11.6064	16.9734	0.548355	0.979955	0.16145	0.520836	11.4881	16.5781	0.529138	0.946219	0.18685	0.639003
Bub1	NM_001106507	chr3:120373603-120404910	0.35142	0	#NAME?	0	1	1	0.340092	0.804009	1.24129	0.687188	0.2155	0.463203	0	0	0	0	1	1	0.771372	0	#NAME?	#NAME?	5e-05	0.00359193
Bub1b	NM_138540	chr3:110367993-110420469	0.177617	0.830359	2.22496	1.05298	0.27045	0.61063	0.17082	0.0207845	-3.0389	0	1	1	0.80555	0	#NAME?	#NAME?	5e-05	0.0020606	0.0199326	0	#NAME?	0	1	1
Bub3	NM_001047906	chr1:203526852-203537456	41.7755	21.4279	-0.963167	-2.03042	0.00405	0.0562004	40.3105	23.8268	-0.758569	-1.57065	0.02505	0.125015	20.7664	31.1789	0.586322	1.04797	0.12215	0.466367	22.9346	30.4301	0.407975	0.717881	0.29735	0.708081
Bud13	NM_001025277	chr8:50573025-50588861	9.544	13.3657	0.485874	0.817877	0.23655	0.5849	9.21371	11.7733	0.353662	0.554541	0.43745	0.653111	12.9723	12.4121	-0.0636833	-0.10334	0.88455	0.95594	11.3083	12.1277	0.100914	0.157609	0.83815	0.947573
Bud31	NM_053556	chr12:10716426-11677818	149.112	215.093	0.528569	0.534181	0.435	0.734541	143.899	296.086	1.04096	1.24055	0.08135	0.269017	208.661	240.367	0.204079	0.2217	0.7413	0.894972	284.634	234.597	-0.278922	-0.344373	0.61815	0.861943
Bves	NM_001077590	chr20:50439884-50474678	0	0	0	0	1	1	0	0	0	0	1	1	0	0	0	0	1	1	0	0	0	0	1	1
Bysl	NM_182674	chr9:15393460-15403212	19.7158	33.4583	0.763014	1.60775	0.02585	0.18013	19.0327	20.1423	0.0817518	0.154937	0.83285	0.91035	32.4776	13.5634	-1.25973	-2.21723	0.0108	0.123977	19.356	13.2548	-0.546264	-0.847651	0.27995	0.695649
Bzw1	NM_198789	chr9:65279674-65291651	26.1875	18.2148	-0.523761	-1.16153	0.1007	0.392925	25.2615	21.8276	-0.210789	-0.4737	0.50015	0.700592	17.6608	23.0128	0.381887	0.732215	0.30795	0.648306	21.0064	22.4522	0.0960285	0.189515	0.78275	0.928733
Bzw2	NM_134402	chr6:55586753-55647650	41.7744	63.0766	0.594485	1.55688	0.02755	0.185752	40.3138	33.7984	-0.254321	-0.574146	0.42005	0.640052	61.1939	32.064	-0.932434	-2.0606	0.00565	0.0827839	32.4888	31.3095	-0.0533425	-0.102254	0.88715	0.966229
C1d	NM_001106021	chr14:100415644-100427878	8.0342	8.37746	0.0603584	0.137846	0.83615	0.936277	7.74047	9.97416	0.365775	0.875949	0.25755	0.498145	8.12396	6.24502	-0.379478	-0.739958	0.307	0.648026	9.60572	6.09294	-0.656756	-1.35959	0.0819	0.487301
C1galt1	NM_022950	chr4:33908298-33938877	0.150641	1.14482	2.92593	1.03867	0.24955	0.596006	0.144786	0.133597	-0.116032	0	1	1	1.11259	0.758271	-0.553137	-0.236002	0.6494	0.851234	0.128309	0.738385	2.52476	0.860767	0.55915	0.835812
C1galt1c1	NM_001030033	chrX:124921726-124926171	25.8622	32.2194	0.317082	0.729829	0.315	0.646425	24.9205	27.0146	0.116405	0.244357	0.7306	0.8529	31.2288	9.09348	-1.77997	-2.55867	0.00175	0.0354345	25.9648	8.88081	-1.54779	-2.12607	0.004	0.112291
C1qa	NM_001008515	chr5:155261253-155264101	190.991	245.857	0.364314	1.34215	0.06235	0.299167	184.346	306.191	0.732016	2.77522	0.0003	0.00429939	238.627	266.959	0.161866	0.565686	0.4287	0.733105	294.244	260.597	-0.175191	-0.646035	0.38445	0.755816
C1qb	NM_019262	chr5:155246443-155251993	86.5955	135.833	0.649471	2.15292	0.00515	0.0665687	83.6211	97.1428	0.21624	0.653481	0.37865	0.60377	131.924	93.2943	-0.499845	-1.52098	0.0451	0.286806	93.3968	91.0953	-0.0359967	-0.100106	0.8926	0.967736
C1qbp	NM_019259	chr10:57613875-57618527	153.297	140.364	-0.127157	-0.436473	0.542	0.797123	147.955	127.421	-0.215554	-0.736424	0.3041	0.536488	136.235	127.02	-0.101047	-0.309345	0.6698	0.860911	122.46	124.026	0.0183314	0.0561372	0.94225	0.98396
C1qc	NM_001008524	chr5:155255024-155258351	64.9244	80.9903	0.318988	0.845501	0.24615	0.592967	62.6905	107.502	0.778051	2.10678	0.00815	0.0557424	78.6384	91.1711	0.213343	0.537008	0.46205	0.7543	103.278	89.0015	-0.214632	-0.576375	0.46115	0.79252
C1ql1	NM_001108838	chr10:91040004-91047177	40.4154	39.597	-0.029513	-0.0766079	0.92465	0.974026	39.0217	22.7316	-0.779581	-1.83353	0.03245	0.148078	38.4701	15.1168	-1.34758	-2.41335	0.00575	0.0836188	21.8419	14.7625	-0.565162	-0.926512	0.2729	0.692033
C1ql2	NM_001105949	chr13:36378186-36379722	10.6296	12.9255	0.282133	0.298117	0.69855	0.876253	10.2604	0.541616	-4.24368	-2.00608	0.25255	0.494512	12.563	1.05599	-3.57251	-1.83082	0.2657	0.620611	0.521228	1.02826	0.980223	0.345658	0.701	0.89549
C1ql3	NM_001109403	chr17:80314185-80320681	61.0323	73.4493	0.267176	0.61022	0.4354	0.734541	58.9562	34.306	-0.781183	-1.46072	0.05425	0.209961	71.35	41.8989	-0.768	-1.4001	0.0905	0.411502	32.9835	40.9241	0.311208	0.483529	0.5202	0.81659
C1ql4	NM_001271242	chr7:140767663-140770736	0	2.07694	inf	#NAME?	0.09415	0.378217	0	0	0	0	1	1	2.02052	0	#NAME?	#NAME?	0.12495	0.46708	0	0	0	0	1	1
C1qtnf1	NM_001007675	chr10:107455844-107476042	4.23836	2.37698	-0.834376	-0.621015	0.4389	0.737552	4.09227	1.27631	-1.68092	-1.2844	0.11535	0.329495	2.31184	1.6867	-0.454841	-0.304502	0.7131	0.881612	1.2258	1.64812	0.42709	0.260134	0.71795	0.903492
C1qtnf2	NM_001191918	chr10:29067101-29084035	7.99806	9.18597	0.199782	0.212118	0.7627	0.905761	7.71985	17.3819	1.17094	1.21322	0.0991	0.301518	8.91867	14.6872	0.719659	0.736373	0.33315	0.668421	16.6933	14.357	-0.217514	-0.272142	0.7081	0.898331
C1qtnf3	NM_001134436	chr2:60920256-60942504	0.252758	1.81199	2.84174	1.4937	0.1649	0.49755	0.243569	0.343042	0.494053	0	1	1	1.75573	1.50603	-0.221321	-0.13762	0.8369	0.937395	0.330453	1.46683	2.15018	1.07457	0.3294	0.727902
C1qtnf4	NM_001107745	chr3:79713579-79718018	714.335	883.332	0.306355	1.69621	0.0657	0.307178	689.398	987.424	0.518333	3.56274	0.00045	0.00602209	858.471	922.235	0.103365	0.581376	0.54945	0.798626	948.281	901.162	-0.0735281	-0.532983	0.64675	0.872473
C1qtnf5	NM_001012123	chr8:48443766-48445637	12.5499	23.4465	0.901695	1.49622	0.04555	0.250044	12.116	17.9811	0.569563	0.895298	0.2228	0.470017	22.7448	12.4184	-0.873058	-1.16443	0.0968	0.42401	17.2803	12.1151	-0.512318	-0.677047	0.33085	0.728099
C1qtnf6	NM_001034932	chr7:119746149-119752666	0.0169415	0	#NAME?	0	1	1	0.0163189	0.665445	5.3497	0	1	1	0	0.173542	inf	0	1	1	0.639012	0.169758	-1.91236	0	1	1
C1qtnf7	NM_001107221	chr14:72011517-72025137	0.566622	1.68529	1.57254	0.721623	0.456	0.746972	0.54563	0.0463022	-3.55877	0	1	1	1.637	0.646963	-1.3393	-0.581956	0.47785	0.761361	0.0446489	0.632873	3.82522	1.09351	0.4925	0.806574
C1qtnf9	NM_001191891	chr15:41074327-41080960	2.43647	1.96013	-0.31384	-0.16895	0.8181	0.928969	2.35383	1.03531	-1.18494	-0.604089	0.34325	0.573698	1.9009	1.37258	-0.469787	-0.225255	0.57995	0.814346	0.99652	1.33716	0.424204	0.182737	0.4989	0.808502
C1r	NM_001134555	chr4:157126059-157136817	4.90082	3.59661	-0.446384	-0.58951	0.3965	0.709214	4.72977	8.00117	0.75844	1.12484	0.1074	0.316265	3.49217	6.8759	0.977426	1.19635	0.10785	0.443844	7.68754	6.71663	-0.194785	-0.280581	0.69105	0.891643
C1rl	NM_001002804	chr4:157108189-157122689	0	0	0	0	1	1	0	0	0	0	1	1	0	0	0	0	1	1	0	0	0	0	1	1
C1s	NM_138900	chr4:157143591-157155596	0.901255	1.78892	0.989085	0.751864	0.25965	0.603518	0.869304	4.1415	2.25222	1.51944	0.0712	0.24722	1.73398	2.49036	0.522267	0.413835	0.5588	0.803089	3.9805	2.43409	-0.709568	-0.699137	0.30715	0.713469
C2	NM_172222	chr20:4542339-4561152	5.17506	4.33547	-0.255385	-0.339064	0.65275	0.85336	4.99635	12.4509	1.3173	2.04605	0.01365	0.082272	4.20902	10.9196	1.37536	1.74794	0.02995	0.22771	11.9592	10.6566	-0.166381	-0.282777	0.7047	0.896906
C2cd2	NM_199391	chr11:38357422-38420032	0.801069	0.364734	-1.13508	-0.730475	0.31125	0.644187	0.774033	0.520351	-0.57291	-0.305863	0.60245	0.771509	0.35388	1.08178	1.61208	0.961326	0.1504	0.503637	0.501327	1.05445	1.07267	0.61791	0.33045	0.728099
C2cd2l	NM_001011996	chr8:48641798-48652064	86.9322	93.8968	0.111186	0.468134	0.5377	0.794796	83.937	85.7148	0.0302369	0.132513	0.8621	0.926209	91.1708	81.401	-0.163525	-0.64315	0.407	0.721404	82.3712	79.4944	-0.0512879	-0.209789	0.7922	0.932163
C2cd3	NM_001191602	chr1:165382689-165479655	0.741048	0.81707	0.140894	0.132403	0.85275	0.94267	0.71551	1.0113	0.499167	0.498544	0.50875	0.707063	0.793125	1.27928	0.689712	0.671671	0.30695	0.648026	0.971189	1.24832	0.362161	0.364846	0.6242	0.865232
C2cd4c	NM_001109285	chr7:12974168-12976330	3.62752	1.69533	-1.09742	-0.863807	0.36405	0.6862	3.5024	2.54716	-0.459453	-0.437686	0.63075	0.791234	1.64789	2.54284	0.625816	0.488681	0.59665	0.822615	2.4478	2.48714	0.0230041	0.0164277	0.9854	0.994789
C2cd5	NM_001134581	chr4:177245867-177331874	12.0797	10.4106	-0.214525	-0.534709	0.44555	0.740824	11.6581	7.1251	-0.710348	-1.58733	0.0276	0.133095	10.0935	8.15003	-0.308553	-0.633034	0.3687	0.695254	6.85512	7.95742	0.215118	0.40203	0.5645	0.838309
C3	NM_016994	chr9:9721136-9747084	6.975	4.51008	-0.629039	-1.15087	0.1087	0.408135	6.73801	21.678	1.68583	3.80881	5e-05	0.000964063	4.37611	20.9343	2.25815	4.16577	5e-05	0.0020606	20.8351	20.442	-0.0274815	-0.0756756	0.91615	0.976248
C3ar1	NM_032060	chr4:155684026-155690869	0	0	0	0	1	1	0	0.0525941	inf	0	1	1	0	0	0	0	1	1	0.0507172	0	#NAME?	0	1	1
C4a	NM_031504	chr20:4302344-4517128	0.646026	0.799956	0.308328	0.0848015	0.90185	0.964481	0.623236	2.02485	1.69996	0.60874	0.53105	0.723543	0.776115	2.75809	1.82933	0.629095	0.31605	0.654556	1.94584	2.6929	0.46877	0.256986	0.50615	0.811914
C4b	NM_001002805	chr20:4302344-4517128	0.0190313	0.0959566	2.33401	0	1	1	0.0183422	0.174265	3.24805	0	1	1	0.093215	0.185748	0.994712	0	1	1	0.168051	0.18162	0.112022	0	1	1
C4bpa	NM_012516	chr13:47342089-47377580	0.723943	0.641891	-0.173547	-0.089205	0.88795	0.958483	0.698432	0.694409	-0.0083352	-0.00427803	0.99065	0.994042	0.624206	0.95023	0.606254	0.276695	0.50035	0.77362	0.669627	0.92958	0.473221	0.207558	0.51655	0.815436
C4bpb	NM_016995	chr13:47387172-47397890	0.329168	0	#NAME?	0	1	1	0.316707	1.46075	2.20549	0.801609	0.3199	0.551498	0	0.796499	inf	#NAME?	0.05765	0.329271	1.4009	0.778206	-0.848125	-0.362627	0.278	0.695555
C5ar1	NM_053619	chr1:78186776-78195132	0.245287	1.58334	2.69043	1.40125	0.1866	0.528662	0.236597	0.794693	1.74796	0.76433	0.25715	0.497879	1.5355	0.876276	-0.809248	-0.424843	0.55145	0.799341	0.762401	0.85646	0.167836	0.0772671	0.742	0.912782
C5ar2	NM_001003710	chr1:78166808-78180216	0.387073	0	#NAME?	0	1	1	0.373734	0.0286209	-3.70687	0	1	1	0	0	0	0	1	1	0.0274612	0	#NAME?	0	1	1
C6	NM_176074	chr2:54466281-54533795	0.151733	0	#NAME?	0	1	1	0.145975	0	#NAME?	0	1	1	0	0	0	0	1	1	0	0	0	0	1	1
C8a	NM_001106670	chr5:124348535-124403117	0	0	0	0	1	1	0	0	0	0	1	1	0	0	0	0	1	1	0	0	0	0	1	1
C8b	NM_001191759	chr5:124300558-124338055	0	0.317506	inf	0	1	1	0	0	0	0	1	1	0.307242	0	#NAME?	0	1	1	0	0	0	0	1	1
C8g	NM_001106555	chr3:2724615-2731210	2.03996	5.72515	1.48877	0.622192	0.48975	0.766229	1.96897	10.7984	2.45531	1.1088	0.3149	0.548036	5.5572	2.45255	-1.18007	-0.538721	0.37195	0.69811	10.3658	2.39904	-2.1113	-1.00584	0.27665	0.695141
C9	NM_057146	chr2:55775561-55823807	0	0	0	0	1	1	0	0	0	0	1	1	0	0	0	0	1	1	0	0	0	0	1	1
Caap1	NM_001034154	chr5:113480537-113532878	7.41347	15.2627	1.04179	1.71436	0.02075	0.157415	7.14036	10.4073	0.543525	0.826137	0.25425	0.496266	14.7919	6.87805	-1.10474	-1.58949	0.034	0.245196	10.0166	6.70899	-0.578229	-0.763361	0.3125	0.717423
Cab39	NM_001106924	chr9:92834356-92895778	38.2941	41.6149	0.119976	0.433561	0.531	0.789782	36.9412	44.6126	0.272223	0.996503	0.1561	0.391268	40.3762	52.8142	0.387419	1.33468	0.0547	0.318983	42.8982	51.5436	0.264877	0.939705	0.1813	0.63571
Cab39l	NM_001011917	chr15:39759256-39847460	6.37169	10.9066	0.775456	0.961594	0.1584	0.487289	6.15077	13.6157	1.14643	1.38908	0.06265	0.228586	10.5845	8.88545	-0.25244	-0.303564	0.6775	0.864805	13.1119	8.66187	-0.598132	-0.713009	0.334	0.72984
Cabin1	NM_053575	chr20:13836031-13963003	12.4865	8.45617	-0.562288	-1.60794	0.0311	0.19902	12.0604	8.0957	-0.575045	-1.6728	0.03945	0.169528	8.20889	8.60476	0.0679482	0.165198	0.8292	0.933423	7.77562	8.40546	0.112369	0.279205	0.73435	0.909411
Cables1	NM_001107404	chr18:3317723-3421721	11.7982	23.3617	0.985581	2.27393	0.0037	0.0535676	11.3911	17.0394	0.580964	1.21441	0.09585	0.295775	22.6901	18.5859	-0.287859	-0.671703	0.38705	0.710153	16.3833	18.1635	0.148819	0.314866	0.68075	0.887287
Cabp1	NM_001033675	chr12:47185448-47209785	67.3269	54.1169	-0.315103	-0.126022	0.77595	0.910099	65.1456	241.226	1.88865	1.25084	0.1662	0.404392	52.3578	293.514	2.48695	1.11773	0.20165	0.565933	231.895	286.424	0.304681	0.322574	0.63975	0.870298
Cabp1	NM_001033676	chr12:47185448-47209785	139.577	183.883	0.397732	0.640854	0.4811	0.76197	134.612	249	0.887345	1.51567	0.14565	0.37576	178.755	354.369	0.987272	1.83614	0.05995	0.335346	239.164	346.267	0.533888	1.08403	0.32725	0.726704
Cabp1	NM_133529	chr12:47185448-47209785	1.05847	0	#NAME?	#NAME?	0.247	0.59365	1.02043	2.91039	1.51203	0.42761	0.6659	0.813392	0	4.3745	inf	#NAME?	0.2007	0.565402	2.79116	4.27098	0.6137	0.223455	0.75435	0.917197
Cabp4	NM_001108926	chr1:219383451-219388009	0	0	0	0	1	1	0	0.256297	inf	0	1	1	0	0.691125	inf	#NAME?	0.1247	0.46708	0.247148	0.675855	1.45134	0.501768	0.6453	0.872011
Cabp5	NM_001108907	chr1:75693231-75706069	0	0	0	0	1	1	0	0	0	0	1	1	0	0	0	0	1	1	0	0	0	0	1	1
Cabp7	NM_001007730	chr14:84968124-84978236	33.8821	27.402	-0.306241	-0.945826	0.20125	0.548523	32.7115	28.1001	-0.219221	-0.68808	0.3749	0.601138	26.5993	19.8511	-0.422167	-1.04038	0.1654	0.525009	27.0015	19.3817	-0.478343	-1.19603	0.1217	0.551555
Cabs1	NM_022263	chr14:21746293-21748356	0	0	0	0	1	1	0	0	0	0	1	1	0	0	0	0	1	1	0	0	0	0	1	1
Cabyr	NM_001143893	chr18:4084227-4095936	1.78051	0.947199	-0.910553	-0.613328	0.43495	0.734541	1.7185	3.81461	1.15038	1.00877	0.15285	0.386803	0.921065	7.52163	3.02967	2.22551	0.0071	0.0958418	3.66967	7.34341	1.0008	1.00686	0.14915	0.591786
Cacfd1	NM_001106561	chr3:5555806-5566613	10.1871	19.0004	0.89928	1.62646	0.02805	0.187502	9.8335	16.0707	0.708655	1.22397	0.09885	0.30107	18.4463	15.0432	-0.29422	-0.534539	0.472	0.758883	15.443	14.689	-0.072215	-0.128674	0.86605	0.956311
Cachd1	NM_001191758	chr5:119596725-119832326	3.35269	3.43746	0.0360223	0.0517332	0.9389	0.977471	3.23949	1.78558	-0.859374	-1.02078	0.1579	0.394049	3.33512	1.13397	-1.55636	-1.42167	0.06415	0.34622	1.71457	1.1071	-0.63107	-0.519335	0.45075	0.786136
Cacna1a	NM_012918	chr19:25526750-25749550	13.7077	10.6373	-0.36586	-1.22278	0.10235	0.39698	13.2334	13.8055	0.061064	0.213032	0.777	0.87914	10.3301	16.6235	0.686375	2.16552	0.00565	0.0827839	13.2677	16.2394	0.291579	0.987403	0.19695	0.648552
Cacna1b	NM_001195199	chr3:1740055-1924909	0	0	0	0	1	1	0	0	0	0	1	1	0	0	0	0	1	1	0	0	0	0	1	1
Cacna1b	NM_147141	chr3:1740055-1924909	8.7708	5.67134	-0.629018	-1.745	0.0116	0.113459	8.46311	6.95186	-0.283789	-0.818776	0.24185	0.486564	5.50026	9.42835	0.777506	1.9328	0.00825	0.10562	6.68004	9.20524	0.462599	1.22699	0.08905	0.500987
Cacna1c	NM_012517	chr4:150641065-151269159	2.60598	1.92939	-0.433683	-0.703564	0.301	0.63667	2.5156	3.02207	0.264634	0.468735	0.5279	0.721363	1.86994	2.40248	0.361536	0.494173	0.47275	0.759436	2.90304	2.34397	-0.30861	-0.466505	0.51595	0.815007
Cacna1d	NM_017298	chr16:6112149-6404957	4.88834	3.11595	-0.649671	-1.35763	0.0602	0.293669	4.71996	3.46574	-0.445609	-0.920706	0.1925	0.438786	3.0242	3.92233	0.37516	0.663843	0.3436	0.676293	3.33253	3.82893	0.200321	0.354165	0.6128	0.860022
Cacna1e	NM_019294	chr13:71907092-72367987	6.71296	6.82954	0.0248408	0.057727	0.9322	0.975931	6.47944	6.10344	-0.0862467	-0.188463	0.7859	0.88494	6.62394	8.1978	0.307546	0.663737	0.34445	0.676709	5.86943	8.00442	0.447577	0.913336	0.2033	0.655235
Cacna1f	NM_053701	chrX:15712786-15741099	0.00949135	0.00517489	-0.875086	0	1	1	0.00914458	0	#NAME?	0	1	1	0.00503319	0.166098	5.04441	0	1	1	0	0.162479	inf	0	1	1
Cacna1g	NM_001308302	chr10:82129073-82197520	4.15662	2.06956	-1.00609	-0.770525	0.2701	0.610439	4.0116	0.000364408	-13.4263	-0.310062	0.1657	0.403884	2.01329	0.506666	-1.99045	-1.07187	0.3185	0.656417	0.000341389	0.494365	10.4999	0	1	1
Cacna1g	NM_031601	chr10:82129073-82197520	2.94686	4.77016	0.694861	0.918929	0.19675	0.543357	2.8453	6.59802	1.21346	2.31302	0.0044	0.0357706	4.62554	8.27142	0.838512	1.19075	0.1073	0.443351	6.33678	8.0793	0.350479	0.858948	0.2854	0.699706
Cacna1h	NM_153814	chr10:14727179-14788617	6.52916	5.30819	-0.298676	-0.740484	0.3327	0.660307	6.30576	1.51312	-2.05915	-3.73878	0.00025	0.00367723	5.15539	1.974	-1.38496	-2.11539	0.0056	0.0824657	1.45341	1.92607	0.406215	0.50339	0.5232	0.817826
Cacna1i	NM_020084	chr7:121521786-121619300	1.1006	0.660415	-0.736842	-0.640344	0.38105	0.697469	1.06244	1.76522	0.732468	0.79471	0.31265	0.545741	0.641281	1.3317	1.05425	0.8845	0.17965	0.54155	1.69509	1.29928	-0.383652	-0.380991	0.599	0.853698
Cacna1s	NM_053873	chr13:52889569-52964558	0	0	0	0	1	1	0	0.166424	inf	0	1	1	0	0.0666649	inf	0	1	1	0.159628	0.065211	-1.29153	0	1	1
Cacna2d1	NM_001110847	chr4:15710414-16130841	0	0	0	0	1	1	0	0	0	0	1	1	0	0	0	0	1	1	0	0	0	0	1	1
Cacna2d1	NM_001110848	chr4:15710414-16130841	0	0	0	0	1	1	0	0	0	0	1	1	0	0	0	0	1	1	0	0	0	0	1	1
Cacna2d1	NM_012919	chr4:15710414-16130841	19.4121	17.1879	-0.175569	-0.500862	0.4717	0.755056	18.7275	22.1701	0.243459	0.703811	0.3105	0.543445	16.6675	25.003	0.585063	1.55867	0.02845	0.222245	21.3208	24.3875	0.19388	0.542076	0.43695	0.780384
Cacna2d2	NM_175592	chr8:116154735-116283746	5.96039	4.37278	-0.446854	-0.654653	0.34695	0.671373	5.75556	1.43239	-2.00654	-1.80611	0.03425	0.15366	4.23917	1.08519	-1.96583	-1.20124	0.10705	0.442896	1.37726	1.05852	-0.379751	-0.216891	0.72865	0.906802
Cacna2d3	NM_175595	chr16:4871649-5795818	5.82368	6.90699	0.246126	0.409741	0.53615	0.793402	5.62163	4.97927	-0.175056	-0.257413	0.7065	0.839794	6.69506	6.0525	-0.145566	-0.209268	0.7662	0.905389	4.79416	5.90519	0.300706	0.385813	0.57045	0.841881
Cacna2d4	NM_001191751	chr4:151298547-151409263	0	0.12161	inf	0	1	1	0	0	0	0	1	1	0.118277	0.0700363	-0.755993	0	1	1	0	0.0685092	inf	0	1	1
Cacnb1	NM_017346	chr10:85954137-85974644	37.1318	49.5006	0.414791	1.52944	0.0443	0.246537	35.8466	43.0587	0.264466	0.972023	0.2167	0.464419	48.0638	38.7627	-0.310282	-1.04592	0.1723	0.533033	41.3691	37.8481	-0.128334	-0.43375	0.5863	0.847008
Cacnb2	NM_053851	chr17:81798413-82019219	5.69386	6.83475	0.263483	0.545476	0.44105	0.738552	5.49655	5.72845	0.0596183	0.114499	0.87005	0.930048	6.6331	3.85545	-0.782782	-1.28453	0.0672	0.355444	5.51038	3.76651	-0.548922	-0.850649	0.2259	0.673565
Cacnb3	NM_012828	chr7:140315368-140324902	101.114	94.7404	-0.0939335	-0.378767	0.61275	0.832805	97.6412	90.0823	-0.116246	-0.476948	0.5326	0.724408	92.0001	110.631	0.266047	0.996029	0.1872	0.550092	86.5626	108.023	0.319523	1.22995	0.1163	0.546211
Cacnb4	NM_001105733	chr3:37955068-38090535	16.6144	15.3592	-0.113328	-0.327976	0.6414	0.847903	16.0135	26.9395	0.750438	2.32987	0.00235	0.0221278	14.8935	23.885	0.681416	1.86438	0.01075	0.123646	25.9277	23.3086	-0.153628	-0.471616	0.52075	0.816788
Cacng1	NM_019255	chr10:95921478-95934170	0.928414	1.24757	0.426284	0.184446	0.6296	0.84236	0.896644	0	#NAME?	#NAME?	0.123	0.340274	1.20715	0	#NAME?	#NAME?	0.1179	0.459581	0	0	0	0	1	1
Cacng2	NM_053351	chr7:119229267-119352033	67.9479	82.7863	0.284964	0.824545	0.28125	0.621111	65.6348	71.1286	0.115969	0.325101	0.6758	0.819446	80.4029	78.1256	-0.0414535	-0.112044	0.8835	0.955602	68.3423	76.2804	0.158533	0.420864	0.5831	0.846017
Cacng3	NM_080691	chr1:192613765-192708371	18.3271	15.9235	-0.202815	-0.295189	0.6704	0.860661	17.6912	15.1635	-0.222426	-0.290628	0.68435	0.825119	15.4553	20.4707	0.405462	0.50518	0.49735	0.772234	14.5839	19.9916	0.45501	0.549904	0.4316	0.777993
Cacng4	NM_080692	chr10:95954159-96015484	15.8069	5.91495	-1.41812	-1.49159	0.0452	0.249216	15.2606	2.93937	-2.37623	-2.02745	0.0515	0.20246	5.73871	3.59094	-0.676365	-0.37663	0.56155	0.804293	2.82253	3.49667	0.308991	0.176074	0.812	0.93856
Cacng5	NM_080693	chr10:96124903-96131710	1.83143	0.450061	-2.02478	-0.77506	0.3296	0.657825	1.76463	0.458307	-1.94498	-0.726723	0.43455	0.65092	0.43568	0.646268	0.568865	0	1	1	0.441954	0.632192	0.516468	0.167922	0.817	0.940709
Cacng6	NM_080694	chr1:64308405-64321044	0.264513	0.227395	-0.218138	0	1	1	0.255095	0.027477	-3.21474	0	1	1	0.221214	0	#NAME?	0	1	1	0.0264963	0	#NAME?	0	1	1
Cacng7	NM_080695	chr1:64375604-64401857	7.24349	2.88309	-1.32907	-0.839485	0.2193	0.56807	6.99055	3.9618	-0.819248	-0.578308	0.4833	0.689681	2.79632	7.63875	1.44981	0.925796	0.18905	0.552113	3.80344	7.46648	0.973125	0.697962	0.34875	0.738627
Cacng8	NM_080696	chr1:64330105-64350338	4.31596	7.46242	0.789962	0.717368	0.3716	0.691347	4.16816	4.99546	0.261206	0.226815	0.7776	0.879395	7.25086	6.40313	-0.179374	-0.163493	0.8533	0.944258	4.7988	6.25878	0.383207	0.302572	0.7294	0.907185
Cactin	NM_001081447	chr7:11261198-11266003	18.3036	17.5913	-0.0572608	-0.118395	0.8737	0.952581	17.6817	12.4992	-0.500415	-0.957089	0.21395	0.461989	17.0818	8.62421	-0.985991	-1.48938	0.0341	0.245196	12.0113	8.41801	-0.51284	-0.727419	0.3217	0.723128
Cacul1	NM_001014248	chr1:281816405-281874511	3.22798	3.00125	-0.105066	-0.153236	0.8298	0.933053	3.11225	3.70875	0.252974	0.369913	0.584	0.760082	2.91209	6.12932	1.07367	1.51929	0.0361	0.253482	3.56221	5.9792	0.747178	1.08573	0.1258	0.551555
Cacybp	NM_001004208	chr13:77948773-77959089	117.28	193.569	0.722892	2.82999	5e-05	0.0023396	113.056	137.924	0.286836	1.14114	0.11535	0.329495	187.678	125.593	-0.579499	-2.1345	0.00315	0.0549155	132.705	122.576	-0.114546	-0.431059	0.55245	0.832092
Cad	NM_001105710	chr6:26657506-26680459	2.32859	2.46201	0.0803767	0.126496	0.8624	0.946007	2.24846	1.65442	-0.442606	-0.57776	0.43715	0.652912	2.39014	2.6895	0.170247	0.247097	0.73705	0.893299	1.59084	2.6287	0.724562	0.913852	0.2192	0.666183
Cadm1	NM_001012201	chr8:51858905-52189267	58.0086	88.5627	0.610433	1.89079	0.0084	0.0910688	55.9899	43.8719	-0.351869	-0.957511	0.1839	0.426734	85.9573	37.5233	-1.19583	-3.05331	0.0002	0.00633859	42.1722	36.6235	-0.203523	-0.464923	0.5093	0.813052
Cadm2	NM_001047102	chr11:4175077-4397335	12.5766	12.8079	0.0262891	0.0344592	0.95795	0.984113	12.1245	15.5391	0.357976	0.466854	0.49745	0.698312	12.424	14.2156	0.19434	0.228476	0.74995	0.898319	14.9541	13.8835	-0.107169	-0.124372	0.8661	0.956311
Cadm3	NM_001047103	chr13:91843362-91872953	8.69267	15.7945	0.861554	1.14888	0.1202	0.427482	8.39592	7.65103	-0.134033	-0.149712	0.83065	0.909726	15.3398	8.04469	-0.931169	-1.06801	0.13365	0.479471	7.35148	7.84825	0.0943378	0.0913763	0.8971	0.969797
Cadm4	NM_001047107	chr1:81365199-81369841	23.9196	22.461	-0.0907719	-0.151451	0.84515	0.940006	23.1015	31.6085	0.452326	0.824433	0.31855	0.550466	21.8107	17.3469	-0.330355	-0.435729	0.5577	0.802425	30.364	16.9281	-0.842938	-1.21824	0.0989	0.514967
Cadps	NM_013219	chr15:15275488-15667779	11.2673	11.3439	0.00976863	0.0204895	0.9775	0.991031	10.8754	11.3148	0.0571439	0.115857	0.87045	0.930199	11.0076	15.829	0.52407	1.04074	0.1387	0.486104	10.8737	15.4516	0.506913	0.987136	0.16775	0.6177
Cage1	NM_001012052	chr17:27452637-27490853	1.15264	1.64505	0.513193	0.389057	0.54305	0.798065	1.11256	0.550923	-1.01396	-0.527672	0.44435	0.658631	1.59752	0.288255	-2.47042	-1.11324	0.29585	0.639877	0.530944	0.281938	-0.91318	0	1	1
Calb1	NM_031984	chr5:29538379-29562774	73.6012	121.711	0.725656	2.64164	0.00025	0.0074038	70.9643	59.8388	-0.246014	-0.819144	0.2484	0.49199	118.022	52.5318	-1.16779	-3.74617	5e-05	0.0020606	57.5452	51.2422	-0.167362	-0.488833	0.49065	0.805598
Calb2	NM_053988	chr19:41482742-41509617	41.7285	50.3496	0.270947	0.724664	0.31375	0.645446	40.2891	7.02774	-2.51926	-3.86802	0.0001	0.00170145	48.8673	6.54274	-2.9009	-3.76149	5e-05	0.0020606	6.75162	6.38321	-0.0809512	-0.0711102	0.92435	0.979212
Calca	NM_001033955	chr1:184184017-184188911	0.000171349	1.0757	12.6161	0.0254071	0.04125	0.235501	0.000166668	2.22268	13.703	0.0285403	0.16025	0.397125	1.04325	0.000857421	-10.2488	-0.115153	0.13035	0.474344	2.14333	0.000803874	-11.3806	-0.127796	0.22465	0.672264
Calca	NM_001033956	chr1:184184017-184188911	0.730587	0.00498591	-7.19506	-0.297395	0.40335	0.713797	0.703047	0.0291145	-4.59381	-0.0456351	0.44565	0.659955	0.0046448	1.21785	8.03451	0.271787	0.1642	0.524819	0.0279328	1.18772	5.41009	0.0592111	0.2082	0.656151
Calca	NM_017338	chr1:184184017-184188911	0	0	0	0	1	1	0	0	0	0	1	1	0	0	0	0	1	1	0	0	0	0	1	1
Calcb	NM_138513	chr1:184272689-184276346	0.754165	0	#NAME?	#NAME?	0.1122	0.412741	0.729481	1.64881	1.17648	0.472932	0.56715	0.747867	0	0	0	0	1	1	1.58101	0	#NAME?	#NAME?	0.12335	0.551555
Calcoco1	NM_139190	chr7:144307561-144322253	0	0	0	0	1	1	0	0	0	0	1	1	0	0	0	0	1	1	0	0	0	0	1	1
Calcoco1	NM_139190_1	chr7:145435583-145450301	0	0	0	0	1	1	0	0	0	0	1	1	0	0	0	0	1	1	0	0	0	0	1	1
Calcr	NM_001034015	chr4:28627439-28702559	0.13269	1.20758	3.18598	0.286333	0.1975	0.543357	0.127646	0	#NAME?	0	1	1	1.17089	0	#NAME?	#NAME?	5e-05	0.0020606	0	0	0	0	1	1
Calcr	NM_053816	chr4:28627439-28702559	1.43719	0.392701	-1.87175	-0.857539	0.5026	0.774116	1.38983	0	#NAME?	#NAME?	0.06645	0.236776	0.381695	0	#NAME?	0	1	1	0	0	0	0	1	1
Calcrl	NM_012717	chr3:71750499-71845232	0.151859	0.217596	0.518917	0	1	1	0.14617	0.0937894	-0.640148	0	1	1	0.211273	0	#NAME?	0	1	1	0.090392	0	#NAME?	0	1	1
Cald1	NM_013146	chr4:62221010-62290229	6.56496	8.67072	0.401367	0.690894	0.3139	0.645446	6.33118	7.74806	0.291362	0.471299	0.5052	0.704719	8.40731	8.69475	0.048501	0.077755	0.9148	0.967738	7.45362	8.48285	0.186609	0.289796	0.6791	0.886474
Calhm1	NM_001109168	chr1:266916311-266919031	0	0	0	0	1	1	0	0	0	0	1	1	0	0	0	0	1	1	0	0	0	0	1	1
Calhm2	NM_001008306	chr1:266908366-266914093	6.30299	5.38853	-0.226146	-0.299532	0.67875	0.864527	6.08402	7.20906	0.244786	0.318152	0.6443	0.799273	5.23202	15.3397	1.55183	2.12332	0.01595	0.157782	6.93578	14.9962	1.11247	1.56195	0.0329	0.340876
Calhm3	NM_001191956	chr1:266929298-266934303	0	0	0	0	1	1	0	0	0	0	1	1	0	0	0	0	1	1	0	0	0	0	1	1
Calm1	NM_031969	chr6:124217240-124225292	2859.48	4042	0.499317	2.2665	0.00165	0.0307352	2757.72	5215.62	0.919365	4.68448	5e-05	0.000964063	3920.68	3917.84	-0.00104595	-0.00505387	0.99475	0.99854	5016.27	3822.85	-0.391965	-1.89776	0.00815	0.172013
Calm2	NM_017326	chr15:65506870-65507984	783.944	1278.62	0.705768	3.09667	5e-05	0.0023396	755.783	1632.37	1.11092	5.46359	5e-05	0.000964063	1239.77	1105.7	-0.16511	-0.697536	0.32235	0.659058	1570.59	1078.7	-0.542019	-2.58544	0.00035	0.017833
Calm2	NM_017326_1	chr6:11067674-11080078	1717.86	2753.38	0.680587	2.95285	5e-05	0.0023396	1656.24	3395.42	1.03568	5.17389	5e-05	0.000964063	2670.3	2008.19	-0.411109	-1.71044	0.01575	0.15683	3266.55	1959.58	-0.737222	-3.53074	5e-05	0.00359193
Calm3	NM_012518	chr1:78844519-78851628	1995.53	2883.23	0.530914	2.36279	0.00145	0.0278982	1925.56	2667.71	0.470325	2.20912	0.0028	0.0251721	2795.75	2172.79	-0.36369	-1.50735	0.03845	0.261788	2566.2	2119.68	-0.275785	-1.20832	0.0949	0.51006
Calml3	NM_001012054	chr17:70072155-70073531	0	0	0	0	1	1	0	0	0	0	1	1	0	0	0	0	1	1	0	0	0	0	1	1
Calml4	NM_001127575	chr8:67753278-67765358	15.6942	17.8852	0.188536	0.237041	0.73465	0.894517	15.1462	16.35	0.110328	0.127389	0.8535	0.920561	17.3459	8.27519	-1.06773	-0.920054	0.19225	0.555828	15.7256	8.07602	-0.961397	-0.829983	0.2471	0.679537
Caln1	NM_001077201	chr12:29308340-29743705	103.535	122.713	0.24518	0.623256	0.3762	0.693912	99.9116	28.8747	-1.79085	-3.08209	0.00025	0.00367723	119.09	66.3023	-0.844923	-1.74323	0.0175	0.166207	27.7914	64.6748	1.21856	1.75153	0.0183	0.258434
Calr	NM_022399	chr19:25956770-25961666	285.378	320.288	0.166495	0.700229	0.31565	0.646657	275.379	304.514	0.145086	0.636741	0.36585	0.593696	310.743	295.269	-0.073694	-0.29176	0.6764	0.864805	292.871	288.247	-0.0229598	-0.0945998	0.8904	0.967309
Calr3	NM_001012212	chr16:19097390-19124062	3.28589	3.07122	-0.0974708	-0.0738489	0.9193	0.971891	3.17237	7.25061	1.19254	0.967371	0.14805	0.379115	2.98035	0.6663	-2.16124	-0.980058	0.36495	0.692532	6.97296	0.651364	-3.42023	-1.79433	0.266	0.687991
Calu	NM_001033898	chr4:56625610-56653112	2.52576	1.63277	-0.629394	-0.257386	0.6977	0.876157	2.42952	4.88099	1.0065	0.393216	0.54285	0.730602	1.58693	2.10386	0.406807	0.188209	0.81905	0.928788	4.70737	2.04769	-1.20092	-0.53235	0.53335	0.822716
Calu	NM_022535	chr4:56625610-56653112	8.59856	15.0193	0.804654	1.21154	0.10555	0.401928	8.30119	6.93575	-0.259267	-0.178915	0.75465	0.866283	14.5627	7.95417	-0.872492	-1.44908	0.04025	0.268402	6.65056	7.76084	0.222736	0.156245	0.75855	0.920028
Caly	NM_001190399	chr1:212537850-212549040	593.229	721.647	0.282704	0.851748	0.2406	0.587831	573.355	337.273	-0.765512	-0.858283	0.27425	0.510728	700.704	319.966	-1.13089	-2.11901	0.02325	0.196496	323.558	312.634	-0.0495517	-0.0502363	0.93675	0.98268
Caly	NM_138915	chr1:212537850-212549040	300.499	516.871	0.782444	1.78338	0.0118	0.114648	289.892	309.412	0.0940152	0.09704	0.80795	0.896958	501.361	228.994	-1.13054	-1.64079	0.03545	0.250578	297.897	223.458	-0.414809	-0.375271	0.5628	0.837041
Camk1	NM_134468	chr4:145283042-145299602	201.139	180.947	-0.152623	-0.562759	0.42855	0.729083	194.154	157.79	-0.299201	-1.10062	0.11755	0.33218	175.563	145.058	-0.275359	-0.912717	0.188	0.550777	151.69	141.58	-0.0995001	-0.324218	0.6426	0.870495
Camk1d	NM_001107365	chr17:76532610-76938956	2.46147	2.94873	0.260573	0.402153	0.57815	0.815629	2.37754	2.1894	-0.118938	-0.159713	0.8316	0.910216	2.86148	2.50836	-0.19002	-0.250155	0.7229	0.886746	2.10683	2.44645	0.215615	0.247386	0.7196	0.903735
Camk1g	NM_182842	chr13:112075697-112099336	12.7434	6.8765	-0.890006	-1.65592	0.0254	0.178563	12.3104	10.4278	-0.23945	-0.491941	0.5342	0.725742	6.67286	8.99197	0.430331	0.654268	0.3515	0.6811	10.0178	8.78066	-0.190164	-0.320217	0.6768	0.885738
Camk2a	NM_012920	chr18:56193977-56295869	157.696	90.6272	-0.799127	-2.72159	0.00025	0.0074038	152.284	101.696	-0.582499	-1.97916	0.00595	0.0449143	87.9795	181.81	1.04719	3.30864	5e-05	0.0020606	97.7764	177.495	0.860222	2.74731	0.0005	0.0238967
Camk2b	NM_001042354	chr14:86208894-86297652	0.109592	0.562399	2.35944	0	1	1	0.105679	0	#NAME?	0	1	1	0.547161	0.718471	0.392963	0.08728	0.7244	0.887187	0	0.699651	inf	#NAME?	0.1517	0.595574
Camk2b	NM_001042356	chr14:86208894-86297652	71.3436	59.4555	-0.262974	-0.344748	0.56675	0.809269	68.8059	86.3784	0.328138	0.762664	0.3164	0.548936	57.6372	72.0492	0.321983	0.377455	0.57615	0.81155	82.9928	70.317	-0.239111	-0.427605	0.55545	0.833896
Camk2b	NM_021739	chr14:86208894-86297652	216.774	166.899	-0.377215	-1.14365	0.12075	0.427549	209.371	134.992	-0.633194	-2.30325	0.00305	0.0269038	162.045	220.375	0.443565	1.25561	0.09645	0.42393	129.755	215.244	0.730177	2.36516	0.0015	0.057447
Camk2d	NM_012519	chr2:230901125-231130336	9.38445	7.0562	-0.411379	-0.647794	0.3643	0.686466	9.05871	4.18936	-1.11258	-1.39718	0.0548	0.211531	6.84779	6.59917	-0.0533534	-0.0652152	0.9305	0.975411	4.03196	6.44386	0.676445	0.730749	0.27165	0.691263
Camk2g	NM_133605	chr15:3936785-3993868	3.56989	1.45232	-1.29752	-0.814774	0.2349	0.583038	3.44856	5.53763	0.683272	0.592942	0.415	0.635954	1.40867	4.32782	1.61931	1.02142	0.17425	0.535938	5.31878	4.22715	-0.33141	-0.282942	0.7073	0.898331
Camk2n1	NM_173337	chr5:156876705-156878486	4924.14	4487.31	-0.134021	-0.579672	0.41275	0.719642	4753.82	7183.27	0.595555	2.88208	5e-05	0.000964063	4354.66	8588.87	0.979906	4.0795	5e-05	0.0020606	6904.68	8385.01	0.280237	1.32875	0.0689	0.453298
Camk2n2	NM_021678	chr11:83975429-83976557	27.7059	29.3313	0.0822509	0.0809283	0.9207	0.972018	26.7512	24.4219	-0.131425	-0.137498	0.87675	0.932968	28.4895	31.7723	0.157339	0.139654	0.85705	0.945316	23.4536	31.0255	0.403646	0.373498	0.6646	0.879559
Camk4	NM_012727	chr18:25749103-25965918	44.3097	47.4719	0.099451	0.266796	0.7032	0.878787	42.7784	71.1103	0.733175	2.02434	0.00635	0.0470253	46.0448	69.751	0.599175	1.56539	0.03005	0.227876	68.3737	68.089	-0.00602026	-0.0166988	0.97965	0.993426
Camkk1	NM_031662	chr10:59585091-59608167	45.6462	44.446	-0.0384413	-0.137855	0.8452	0.940006	44.0664	87.4186	0.988261	3.78886	5e-05	0.000964063	43.1228	70.3923	0.706967	2.41708	0.0006	0.015655	84.0304	68.7354	-0.289858	-1.09901	0.1341	0.567508
Camkk2	NM_031338	chr12:39253408-39302601	30.5274	28.4116	-0.103624	-0.267066	0.71635	0.885414	29.4757	46.8175	0.667522	1.84453	0.01855	0.101239	27.5973	47.0087	0.768399	1.96172	0.0146	0.150291	44.9595	45.9127	0.0302694	0.0878667	0.91355	0.975578
Camkmt	NM_001134463	chr6:8346644-8729773	12.9167	14.6049	0.17721	0.294472	0.6694	0.860457	12.4556	5.02983	-1.30821	-1.59273	0.03345	0.151345	14.1661	5.65781	-1.32413	-1.52156	0.0287	0.223003	4.82819	5.51666	0.192312	0.171029	0.8103	0.937742
Camkv	NM_024000	chr8:116715754-116730061	359.744	282.851	-0.346929	-1.56748	0.0309	0.198609	347.261	230.902	-0.588739	-2.96281	0.0001	0.00170145	274.56	312.91	0.188629	0.812734	0.271	0.624392	221.912	305.553	0.461435	2.1846	0.004	0.112291
Camlg	NM_053334	chr17:9523807-9534634	26.4851	30.1883	0.188805	0.401345	0.5722	0.813162	25.553	17.0681	-0.582192	-1.04909	0.1292	0.349069	29.2811	15.895	-0.881397	-1.44709	0.0392	0.263966	16.415	15.5023	-0.0825378	-0.118175	0.8639	0.956311
Camp	NM_001100724	chr8:117930557-117932371	0.551059	3.88304	2.81691	1.27584	0.289	0.626176	0.532341	3.92168	2.88105	1.2795	0.27325	0.509781	3.77411	1.72253	-1.13161	-0.502405	0.46565	0.755857	3.76306	1.6785	-1.16474	-0.501018	0.47155	0.796313
Camsap1	NM_001168549	chr3:3373970-3434027	18.3146	17.5927	-0.0580156	-0.188074	0.7874	0.914879	17.6779	19.6252	0.150759	0.494555	0.48355	0.689773	17.0677	25.0083	0.551138	1.68872	0.0159	0.157555	18.8644	24.4106	0.371841	1.17571	0.094	0.508991
Camsap2	NM_001134503	chr13:53145711-53225256	21.3373	18.7139	-0.189274	-0.690523	0.32465	0.653647	20.577	20.2118	-0.0258364	-0.0956286	0.8909	0.939515	18.1548	22.6897	0.321686	1.08607	0.12175	0.466022	19.4372	22.1344	0.187468	0.650647	0.3574	0.74292
Camsap3	NM_001144840	chr12:2134021-2157403	15.201	8.66015	-0.811705	-2.06611	0.01005	0.103037	14.6843	8.84916	-0.730666	-1.91686	0.02615	0.128751	8.40968	14.2779	0.76366	1.68797	0.04	0.267194	8.50189	13.9482	0.714221	1.66936	0.05575	0.413336
Camta1	NM_001195559	chr5:168138206-169017295	41.7081	33.6054	-0.311633	-1.25767	0.073	0.325787	40.2484	40.4622	0.00764229	0.0328776	0.96345	0.978135	32.5986	51.6546	0.664088	2.53678	0.00035	0.009932	38.8978	50.4328	0.374675	1.5351	0.02965	0.331656
Camta1	NM_001195560	chr5:168138206-169017295	20.1844	25.3817	0.33055	0.220457	0.7571	0.904284	19.4732	23.9429	0.298104	0.201957	0.7727	0.877578	24.6073	26.1885	0.0898469	0.0608722	0.93135	0.9756	23.0247	25.5641	0.150933	0.092066	0.8988	0.970233
Camta2	NM_001105801	chr10:57291191-57309298	50.5348	46.1115	-0.132149	-0.546412	0.46895	0.753748	48.7917	57.0448	0.225458	0.997775	0.212	0.460066	44.7677	63.884	0.512996	1.995	0.00985	0.117222	54.8121	62.3865	0.186738	0.788458	0.331	0.728099
Cand1	NM_054004	chr7:62124361-62162451	10.4377	6.53344	-0.675892	-1.52444	0.03315	0.207707	10.0703	7.87772	-0.354257	-0.796626	0.25365	0.495703	6.33693	5.07989	-0.318986	-0.547017	0.4346	0.737441	7.57086	4.95703	-0.610982	-1.05063	0.13625	0.57076
Cand2	NM_181362	chr4:147686489-147714585	2.00985	1.92429	-0.0627597	-0.0701847	0.92835	0.975061	1.94069	0.213567	-3.18381	-2.32561	0.0081	0.0555625	1.86749	1.99702	0.0967439	0.0935945	0.9087	0.966017	0.205208	1.9513	3.24928	2.2329	0.11715	0.546833
Cant1	NM_144754	chr10:107432503-107445522	15.5215	17.6339	0.184078	0.445202	0.53785	0.794891	14.9799	12.6373	-0.245344	-0.530716	0.46195	0.672893	17.1165	15.002	-0.190225	-0.41234	0.58385	0.81662	12.1509	14.6556	0.270395	0.527307	0.47785	0.79952
Canx	NM_172008	chr10:35800941-35833861	46.8758	68.6514	0.550448	2.27093	0.0019	0.0340371	45.1592	60.7928	0.428881	1.87324	0.00925	0.0614726	66.5541	42.0593	-0.662103	-2.58404	0.0003	0.00883561	58.4971	41.032	-0.511614	-2.10712	0.00465	0.123637
Cap1	NM_022383	chr5:140559203-140585408	60.5137	61.2802	0.0181612	0.0650825	0.9285	0.975061	58.4187	47.4268	-0.300726	-1.03271	0.1493	0.380819	59.463	48.47	-0.2949	-0.927691	0.1903	0.552519	45.5815	47.3084	0.0536505	0.162314	0.8165	0.940508
Cap2	NM_053874	chr17:18442603-18592750	53.8177	46.0418	-0.225136	-0.640161	0.3759	0.693837	51.9829	53.4911	0.041263	0.11839	0.8666	0.928223	44.6755	69.9649	0.64715	1.7035	0.01705	0.163531	51.4086	68.2725	0.409294	1.10785	0.1221	0.551555
Capg	NM_001013086	chr4:100407657-100419447	8.65917	5.16116	-0.746535	-0.778707	0.275	0.615566	8.36313	7.58287	-0.1413	-0.162272	0.8173	0.901782	5.01232	2.2026	-1.18627	-0.71776	0.3238	0.659762	7.29115	2.14845	-1.76285	-1.17164	0.11035	0.53913
Capn1	NM_019152	chr1:221346080-221370276	2.65686	1.3093	-1.02092	-0.835229	0.2232	0.571959	2.56358	1.32202	-0.95541	-0.755422	0.27335	0.509781	1.26996	1.94859	0.617655	0.44224	0.523	0.783627	1.27202	1.90251	0.580785	0.414671	0.5391	0.825421
Capn10	NM_031673	chr9:99557510-100504076	23.4372	12.2563	-0.935274	-0.68699	0.33295	0.660592	22.6323	8.91231	-1.34451	-1.07416	0.1821	0.424574	11.897	18.3656	0.626411	0.391343	0.58715	0.818347	8.56155	17.9391	1.06717	0.817928	0.313	0.717463
Capn11	NM_001002806	chr9:17728844-17750356	0.0118098	0.086275	2.86896	0	1	1	0.0113745	0	#NAME?	0	1	1	0.0839078	0	#NAME?	0	1	1	0	0	0	0	1	1
Capn12	NM_001110808	chr1:87066288-87147308	4.20664	2.53444	-0.731002	-0.43272	0.55155	0.802991	4.05993	2.66479	-0.607433	-0.362089	0.71175	0.842421	2.4595	1.70338	-0.529969	-0.235558	0.61195	0.830193	2.55814	1.66617	-0.618561	-0.314144	0.5905	0.849891
Capn13	NM_001025133	chr6:24579595-24676418	0.183995	0	#NAME?	0	1	1	0.17807	0	#NAME?	0	1	1	0	0.0855942	inf	0	1	1	0	0.0833513	inf	0	1	1
Capn15	NM_001106990	chr10:15319773-15346374	11.4958	7.45491	-0.624849	-1.64026	0.0334	0.208158	11.1007	5.63092	-0.97921	-2.56287	0.00585	0.0444744	7.23587	11.3051	0.643737	1.50246	0.05485	0.319538	5.40981	11.0443	1.02965	2.41466	0.0082	0.172439
Capn2	NM_017116	chr13:100878648-100928811	25.7649	13.1225	-0.973365	-2.52085	0.00085	0.019085	24.8668	17.6639	-0.493421	-1.35612	0.06025	0.223658	12.7316	22.2354	0.804448	1.81579	0.0135	0.143007	16.975	21.7148	0.355265	0.862569	0.2384	0.678537
Capn3	NM_017117	chr3:112228620-112278408	0.0237343	0	#NAME?	0	1	1	0.0228557	0.247601	3.43739	0	1	1	0	0	0	0	1	1	0.238761	0	#NAME?	0	1	1
Capn5	NM_134461	chr1:163075126-163129636	1.98234	0.589013	-1.75083	-0.936105	0.29775	0.633172	1.91535	0.592897	-1.69175	-0.832895	0.23325	0.478458	0.570314	1.91332	1.74625	0.815093	0.28115	0.630393	0.570617	1.86583	1.70922	0.761267	0.2312	0.677881
Capn6	NM_031808	chrX:115049112-115073824	0.817048	0.961534	0.234916	0.169231	0.80745	0.924913	0.787733	1.05509	0.421581	0.239751	0.7149	0.844129	0.93203	0.53386	-0.803913	-0.394966	0.54115	0.794664	1.01735	0.519908	-0.968491	-0.48142	0.435	0.779066
Capn7	NM_001030037	chr16:7435633-7471808	11.6395	11.4932	-0.018245	-0.0443828	0.94985	0.981931	11.2258	5.15518	-1.12273	-2.2012	0.0038	0.0320024	11.1459	8.27978	-0.428851	-0.86018	0.21805	0.583685	4.96046	8.08158	0.704162	1.16043	0.09365	0.508285
Capn8	NM_133309	chr13:100980573-101043110	0	0	0	0	1	1	0	0	0	0	1	1	0	0	0	0	1	1	0	0	0	0	1	1
Capn9	NM_001271140	chr19:57341937-57378901	0	0.183697	inf	0	1	1	0	0	0	0	1	1	0.178549	0	#NAME?	0	1	1	0	0	0	0	1	1
Capns1	NM_017118	chr1:88623124-88658797	23.1213	26.8771	0.217154	0.417145	0.55565	0.805125	22.3207	22.4942	0.0111726	0.0201384	0.97845	0.986105	26.0921	12.7184	-1.03669	-1.47174	0.04255	0.278017	21.6185	12.4138	-0.800318	-1.03088	0.1598	0.60675
Capns2	NM_001109380	chr19:15470608-15540704	0	1.12139	inf	#NAME?	0.2476	0.59365	0	0.122385	inf	0	1	1	1.09066	0	#NAME?	#NAME?	0.25045	0.610449	0.11736	0	#NAME?	0	1	1
Caprin1	NM_001012185	chr3:93702486-93734282	18.9816	27.3256	0.525648	1.51164	0.032	0.202782	18.3223	14.0248	-0.385619	-0.956763	0.16965	0.408547	26.5054	19.2798	-0.4592	-1.1852	0.08615	0.402712	13.4905	18.8261	0.480786	1.07414	0.1233	0.551555
Caps2	NM_001108990	chr7:54859325-54917177	0.663626	0	#NAME?	#NAME?	5e-05	0.0023396	0.639412	0	#NAME?	#NAME?	0.00015	0.00238596	0	0.0114679	inf	0	1	1	0	0.0111672	inf	0	1	1
Capsl	NM_001106417	chr2:58724854-58747843	1.95439	0.700123	-1.48103	-0.692308	0.45325	0.745495	1.88489	0	#NAME?	#NAME?	0.00015	0.00238596	0.677329	0	#NAME?	0	1	1	0	0	0	0	1	1
Capza1	NM_001109625	chr2:207305749-207421081	12.3386	8.57801	-0.524459	-1.15098	0.1138	0.416481	11.9074	6.47887	-0.878037	-1.75871	0.0161	0.0922484	8.32667	10.8046	0.375838	0.743923	0.3074	0.64819	6.23071	10.5426	0.758768	1.35102	0.0564	0.416125
Capza2	NM_001009180	chr4:44936289-44972270	75.6727	88.7053	0.229247	0.894004	0.2067	0.554081	72.9315	92.8031	0.34763	1.43712	0.0489	0.195985	86.0092	90.4924	0.0733058	0.274273	0.7006	0.875881	89.3158	88.2531	-0.0172689	-0.069205	0.926	0.979577
Capza3	NM_017164	chr4:174181643-174182857	0	0	0	0	1	1	0	0	0	0	1	1	0	0	0	0	1	1	0	0	0	0	1	1
Capzb	NM_001005903	chr5:157642776-157742484	239.536	195.482	-0.293208	-1.24312	0.0936	0.377244	231.245	181.581	-0.348809	-1.54014	0.04005	0.17129	189.743	214.728	0.178462	0.704973	0.3458	0.677826	174.493	209.72	0.265297	1.08723	0.1484	0.591032
Car1	NM_001107660	chr2:88185203-88227486	0	0	0	0	1	1	0	0	0	0	1	1	0	0	0	0	1	1	0	0	0	0	1	1
Car11	NM_175708	chr1:101682179-101687291	139.068	92.6509	-0.585916	-2.18135	0.00625	0.0751413	134.263	83.6171	-0.683193	-2.57042	0.0028	0.0251721	89.9806	84.2618	-0.0947363	-0.299643	0.7108	0.881046	80.343	82.3081	0.0348636	0.110789	0.8957	0.969153
Car12	NM_001080756	chr8:72405922-72458898	1.45865	1.94901	0.418114	0.230267	0.7445	0.899614	1.40774	0.598353	-1.23431	-0.603515	0.29695	0.529613	1.89231	1.07571	-0.814863	-0.410124	0.2808	0.630393	0.575202	1.04921	0.867159	0.384491	0.3351	0.730725
Car13	NM_001134993	chr2:88282960-88314254	0	0	0	0	1	1	0	0.497757	inf	0	1	1	0	0.766883	inf	#NAME?	0.00025	0.00765289	0.479798	0.748095	0.640795	0.339976	0.60395	0.85583
Car14	NM_001109655	chr2:198010545-198016859	8.12807	3.43813	-1.24129	-1.11113	0.1179	0.422986	7.84162	4.87145	-0.686799	-0.608971	0.4083	0.629969	3.33984	2.28216	-0.549377	-0.321022	0.67965	0.866028	4.67954	2.22912	-1.06989	-0.705841	0.30085	0.710999
Car15	NM_001105901	chr11:87295560-87298506	0	0	0	0	1	1	0	0	0	0	1	1	0	0	0	0	1	1	0	0	0	0	1	1
Car15	NM_001105901_1	chr11:87759483-87762377	0	0	0	0	1	1	0	0	0	0	1	1	0	0	0	0	1	1	0	0	0	0	1	1
Car2	NM_019291	chr2:88097740-88112868	300.439	214.089	-0.488861	-2.01376	0.0051	0.0661417	289.778	225.221	-0.36361	-1.55957	0.0271	0.131278	207.662	216.227	0.0583116	0.221014	0.7516	0.898358	216.555	211.041	-0.0372109	-0.145925	0.83745	0.947573
Car3	NM_019292	chr2:88127367-88135327	1.76223	0.536702	-1.71521	-0.680855	0.3902	0.704912	1.70054	0.0476025	-5.15881	-1.75436	0.17705	0.41922	0.519521	0	#NAME?	0	1	1	0.0456529	0	#NAME?	0	1	1
Car4	NM_019174	chr10:72272285-72281069	11.0164	12.1457	0.140795	0.192529	0.78015	0.911486	10.6326	33.5792	1.65907	2.49478	0.0032	0.0279119	11.7947	37.6522	1.6746	2.45247	0.00165	0.0343029	32.265	36.7806	0.188973	0.352377	0.62635	0.865826
Car5a	NM_019293	chr19:54731841-54761637	0	0	0	0	1	1	0	0	0	0	1	1	0	0	0	0	1	1	0	0	0	0	1	1
Car5b	NM_001005551	chrX:32244447-32291063	2.25264	1.35921	-0.728851	-0.394992	0.49785	0.772115	2.16623	1.26349	-0.777777	-0.536233	0.43245	0.649359	1.31491	2.72442	1.05098	0.657729	0.2918	0.637196	1.213	2.65575	1.13054	0.61606	0.3522	0.739154
Car6	NM_001134841	chr5:167226245-167244786	13.1057	14.2156	0.117274	0.16877	0.8091	0.925625	12.6534	11.6899	-0.114265	-0.15068	0.83265	0.910216	13.7846	14.9553	0.117594	0.152589	0.82705	0.93224	11.2269	14.5874	0.37776	0.444567	0.52765	0.821152
Car7	NM_001106165	chr19:636544-645916	17.6494	8.36385	-1.07738	-1.74239	0.0272	0.184777	17.0506	23.5531	0.466094	0.91559	0.21665	0.464397	8.12132	32.9819	2.02189	3.02581	0.00125	0.027769	22.6445	32.211	0.508394	1.00218	0.1725	0.623827
Car8	NM_001009662	chr5:21249017-21345810	6.7128	9.10387	0.439565	0.5326	0.44835	0.742402	6.47427	4.17033	-0.634556	-0.599674	0.40115	0.624112	8.81736	7.22485	-0.287378	-0.306655	0.66345	0.857566	4.0177	7.04053	0.809314	0.671523	0.32735	0.726704
Car9	NM_001107956	chr5:59008932-59015533	0	0.189748	inf	0	1	1	0	0.0143723	inf	0	1	1	0.183591	0	#NAME?	0	1	1	0.0137873	0	#NAME?	0	1	1
Card10	NM_001130554	chr7:119999471-120027026	0.0437317	0.142295	1.70213	0	1	1	0.0422569	0	#NAME?	0	1	1	0.137689	0	#NAME?	0	1	1	0	0	0	0	1	1
Card6	NM_001106413	chr2:54812251-54823917	0.422812	0.322407	-0.391132	0	1	1	0.408509	0.0795765	-2.35995	0	1	1	0.312107	0.00567301	-5.78178	0	1	1	0.0767043	0.00554959	-3.78885	0	1	1
Card9	NM_022303	chr3:3798345-3806713	5.47731	4.70141	-0.220375	-0.219891	0.7481	0.901635	5.28668	3.56717	-0.567582	-0.45743	0.4911	0.693287	4.56247	3.72975	-0.290735	-0.239593	0.7296	0.889538	3.43477	3.64244	0.0846913	0.0568159	0.93025	0.981719
Carf	NM_001106915	chr9:66878550-66925923	0.396074	0.156532	-1.33931	0	1	1	0.381923	0.891671	1.22323	0.646701	0.3567	0.586397	0.151935	0.285163	0.908332	0	1	1	0.859766	0.27776	-1.63011	-0.754272	0.413	0.769269
Carhsp1	NM_152790	chr10:7041509-7055107	24.4721	26.7751	0.129757	0.411706	0.56185	0.807408	23.6121	25.3231	0.100929	0.306457	0.6692	0.815021	25.9885	19.0818	-0.445681	-1.20175	0.09685	0.42401	24.3435	18.6337	-0.385625	-1.00073	0.1656	0.614861
Carkd	NM_001108402	chr16:83326227-83342670	65.517	55.7327	-0.233345	-0.631712	0.3847	0.70106	63.2707	61.5388	-0.0400415	-0.108829	0.8816	0.935802	54.0853	65.0069	0.265356	0.64455	0.3726	0.698767	59.1411	63.4706	0.101927	0.252873	0.72945	0.907185
Carm1	NM_001030041	chr8:22577722-22628843	14.7367	12.1608	-0.277177	-0.357001	0.61115	0.831499	14.228	7.90964	-0.847048	-0.782846	0.25785	0.498561	11.8001	9.7739	-0.271799	-0.156796	0.72775	0.888676	7.6077	9.52496	0.324253	0.170508	0.7666	0.922407
Carm1	NM_001034088	chr8:22577722-22628843	0.00197433	0.129286	6.03306	0	1	1	0.00186642	2.13406	10.1591	0.24607	0.3938	0.617512	0.122606	4.06692	5.05184	0.892122	0.33025	0.66614	2.04578	3.97854	0.959583	0.555302	0.679	0.886474
Cars	NM_001106319	chr1:216759414-216801644	21.7989	19.1046	-0.190336	-0.478671	0.4969	0.771304	21.0435	22.5702	0.101049	0.252896	0.7175	0.845607	18.5326	25.5172	0.461405	1.06218	0.129	0.473454	21.699	24.9068	0.198909	0.46135	0.51455	0.814572
Cars2	NM_001177684	chr16:83288663-83325701	19.8142	14.468	-0.453667	-0.836286	0.2255	0.574205	19.122	20.5653	0.104974	0.205994	0.7773	0.87931	14.0328	22.2123	0.662561	1.08971	0.12795	0.471942	19.755	21.6894	0.13477	0.250555	0.73495	0.909526
Cartpt	NM_017110	chr2:30125248-30127269	108.015	118.425	0.13275	0.407733	0.5741	0.814181	104.217	26.5534	-1.97262	-4.19957	5e-05	0.000964063	114.911	21.8542	-2.39453	-4.27579	5e-05	0.0020606	25.5299	21.3428	-0.258438	-0.371528	0.59485	0.851173
Casc1	NM_001106627	chr4:179440983-179476932	2.13038	1.52856	-0.478938	-0.383962	0.5673	0.809302	2.05496	2.55758	0.315669	0.258905	0.7181	0.846059	1.48602	0.614208	-1.27466	-0.681356	0.3189	0.656777	2.45527	0.599392	-2.03431	-1.21293	0.0646	0.441325
Casc3	NM_147144	chr10:86724533-86744485	5.47694	7.80362	0.510774	0.74204	0.28275	0.622426	5.29121	11.447	1.1133	1.61381	0.02655	0.12974	7.57635	12.6491	0.739455	1.11825	0.1157	0.455574	11.0065	12.343	0.165337	0.264461	0.70665	0.897947
Casc4	NM_001271283	chr3:113818648-113887550	19.933	24.4524	0.294815	0.951493	0.17095	0.50714	19.2177	21.5892	0.16787	0.529512	0.4606	0.671761	23.7173	18.7624	-0.338099	-0.994646	0.1687	0.528357	20.7644	18.3041	-0.181947	-0.526574	0.4711	0.79626
Casc5	NM_001170594	chr3:110854999-110909807	0.115124	0.0414574	-1.47349	0	1	1	0.111089	0.100324	-0.147046	0	1	1	0.0401015	0.015776	-1.34593	0	1	1	0.0961899	0.0153624	-2.64648	0	1	1
Cask	NM_022184	chrX:9815651-10156155	3.32183	3.66124	0.140357	0.199915	0.7738	0.909192	3.20482	4.70451	0.553801	0.761286	0.27765	0.51339	3.55178	3.08415	-0.203667	-0.253986	0.7184	0.883548	4.52558	3.00938	-0.588634	-0.693656	0.32595	0.726525
Caskin1	NM_080690	chr10:13854361-13874254	31.9612	34.9836	0.130354	0.533999	0.49795	0.772115	30.8738	29.3715	-0.0719665	-0.304232	0.7135	0.843241	33.975	32.5923	-0.059942	-0.232989	0.76835	0.906258	28.2161	31.8419	0.174408	0.701782	0.4151	0.769645
Caskin2	NM_001107065	chr10:104344098-104358253	8.54752	7.3453	-0.218685	-0.525338	0.4916	0.767286	8.25388	4.0496	-1.02729	-2.04954	0.0062	0.0462064	7.13226	3.19974	-1.15641	-1.81741	0.0183	0.17157	3.8937	3.12264	-0.318372	-0.431529	0.53755	0.824685
Casp1	NM_012762	chr8:2605742-2614633	1.7161	0.665872	-1.36582	-0.584395	0.41695	0.722248	1.65992	2.8065	0.757653	0.425616	0.58075	0.757638	0.64746	1.61331	1.31716	0.554125	0.48225	0.7643	2.70514	1.57598	-0.779452	-0.458239	0.5204	0.816682
Casp12	NM_130422	chr8:2658891-2686160	0.760134	0	#NAME?	#NAME?	0.12505	0.433048	0.731116	0	#NAME?	#NAME?	0.12065	0.336597	0	0	0	0	1	1	0	0	0	0	1	1
Casp14	NM_001191776	chr7:13940637-13943470	0	0	0	0	1	1	0	0	0	0	1	1	0	0	0	0	1	1	0	0	0	0	1	1
Casp2	NM_022522	chr4:71652431-71670228	2.04823	2.29869	0.166433	0.198708	0.76835	0.907306	1.97391	1.37376	-0.52293	-0.541747	0.45	0.66337	2.22734	1.30617	-0.769984	-0.699583	0.2956	0.639863	1.32414	1.27597	-0.0534662	-0.0405847	0.95675	0.98789
Casp3	NM_012922	chr16:48845010-48863204	6.00202	10.2594	0.773421	1.35651	0.0547	0.27833	5.78406	9.79765	0.760352	1.28711	0.07405	0.253679	9.95012	5.97668	-0.735371	-1.12763	0.1096	0.446946	9.42947	5.83532	-0.692365	-1.05017	0.1334	0.565585
Casp4	NM_053736	chr8:2635889-2651682	0.523255	0.82743	0.661122	0.295988	0.52585	0.786523	0.504827	2.629	2.38065	1.17737	0.18845	0.432583	0.800501	1.28205	0.679477	0.309973	0.49765	0.772234	2.52151	1.24921	-1.01327	-0.488853	0.42265	0.773405
Casp6	NM_001271984	chr2:235341373-235353715	0	0	0	0	1	1	0	0	0	0	1	1	0	0	0	0	1	1	0	0	0	0	1	1
Casp6	NM_001271984_1	chr2:230163013-230662084	0	0	0	0	1	1	0	0	0	0	1	1	0	0	0	0	1	1	0	0	0	0	1	1
Casp6	NM_031775	chr2:230163013-230662084	0	0	0	0	1	1	0	0	0	0	1	1	0	0	0	0	1	1	0	0	0	0	1	1
Casp6	NM_031775_1	chr2:235341373-235353715	0	0	0	0	1	1	0	0	0	0	1	1	0	0	0	0	1	1	0	0	0	0	1	1
Casp7	NM_022260	chr1:277210547-277242778	0.981092	0.894839	-0.13276	-0.0687026	0.92525	0.974237	0.945674	2.492	1.39789	0.875002	0.2227	0.469975	0.869649	1.39007	0.676655	0.354043	0.61615	0.833216	2.40044	1.35468	-0.825352	-0.498118	0.49955	0.808746
Casp8	NM_022277	chr9:65614141-65662106	0.275651	0.049331	-2.48227	0	1	1	0.266541	0	#NAME?	0	1	1	0.0477274	1.72236	5.17342	1.70262	0.23185	0.599166	0	1.67747	inf	#NAME?	5e-05	0.00359193
Casp8ap2	NM_001107921	chr5:47853817-47891140	3.48452	5.78633	0.731689	1.57999	0.02885	0.190563	3.35989	2.88527	-0.219711	-0.403169	0.57715	0.754377	5.60848	3.82555	-0.551943	-1.09191	0.1332	0.479439	2.77508	3.73368	0.428067	0.724587	0.3087	0.714745
Casp9	NM_031632	chr5:160356209-160373774	15.2893	13.0311	-0.230568	-0.500849	0.49615	0.770909	14.7649	12.3378	-0.259088	-0.546601	0.47395	0.681899	12.6461	15.4057	0.284769	0.543241	0.45135	0.746786	11.8569	15.0455	0.343606	0.644733	0.39345	0.761175
Casq1	NM_001159594	chr13:90592675-90602365	1.4436	0.0180809	-6.31906	-1.96619	0.1702	0.506101	1.39045	1.28744	-0.111045	-0.0629491	0.92735	0.958319	0.017585	0.0171985	-0.0320672	0	1	1	1.24147	0.0168236	-6.20542	-1.96662	0.1575	0.60416
Casq2	NM_017131	chr2:204512360-204568643	1.36596	2.08444	0.609744	0.488043	0.46015	0.749108	1.31538	0.693108	-0.924325	-0.477861	0.4752	0.683027	2.02	0.0208651	-6.59712	-1.94991	0.254	0.612555	0.66474	0.0204112	-5.02536	-1.42221	0.4016	0.764223
Casr	NM_001309638	chr11:67188629-67258789	0	0.12035	inf	0	1	1	0	0.214417	inf	0	1	1	0.109046	7.94882e-05	-10.4219	0	1	1	0.206764	7.31275e-05	-11.4653	0	1	1
Casr	NM_016996	chr11:67188629-67258789	0	0.579434	inf	0	1	1	0	0.46221	inf	0	1	1	0.569283	0.0987354	-2.52751	0	1	1	0.443337	0.0965882	-2.19849	0	1	1
Cass4	NM_001191744	chr3:170399486-170437043	0.0956199	0.0147817	-2.69349	0	1	1	0.0921485	0	#NAME?	0	1	1	0.0143776	0.0144856	0.0107953	0	1	1	0	0.0141693	inf	0	1	1
Cast	NM_001033715	chr2:1452110-1561464	2.05276	3.05049	0.571478	0.742342	0.2827	0.622426	1.97761	1.19542	-0.726238	-0.55223	0.47665	0.68444	2.95571	1.74342	-0.761585	-0.850203	0.2314	0.598404	1.15276	1.70501	0.564691	0.40343	0.60585	0.856319
Cast	NM_001033716	chr2:1452110-1561464	0.000362615	0.94073	11.3411	0.202539	0.14475	0.466407	0.000338151	2.87639	13.0543	0.231204	0.13015	0.350666	0.912112	0.491418	-0.892259	-0.480012	0.54855	0.79832	2.77286	0.479063	-2.53309	-1.46594	0.2713	0.69126
Cast	NM_053295	chr2:1452110-1561464	1.24518	0.445618	-1.48247	-0.935617	0.3275	0.656459	1.20242	3.82602	1.6699	1.25725	0.09765	0.299122	0.431354	2.49388	2.53145	1.62362	0.1695	0.529285	3.6768	2.43499	-0.594533	-0.497217	0.42645	0.775278
Cat	NM_012520	chr3:93379871-93412058	25.6045	28.6112	0.160183	0.434635	0.5325	0.791309	24.7225	33.7297	0.448194	1.18809	0.09525	0.294389	27.7605	21.4252	-0.373723	-0.887478	0.20215	0.565933	32.4069	20.9093	-0.632157	-1.49721	0.0345	0.347282
Catsper2	NM_001012220	chr3:113357360-113376751	2.69255	0.889717	-1.59756	-1.00804	0.15315	0.478129	2.5988	1.42919	-0.862655	-0.671873	0.3064	0.538843	0.861155	1.20689	0.486953	0.252577	0.69215	0.872802	1.37394	1.17705	-0.223143	-0.123756	0.86215	0.956238
Catsper3	NM_001106101	chr17:8900040-8925367	0	0	0	0	1	1	0	0	0	0	1	1	0	0	0	0	1	1	0	0	0	0	1	1
Catsperd	NM_001134984	chr9:10390307-10427529	0.248053	0.281504	0.182503	0	1	1	0.238863	0.408689	0.774819	0	1	1	0.273743	0.223661	-0.291513	0	1	1	0.394099	0.21875	-0.849274	0	1	1
Catsperg1	NM_001170340	chr1:88131288-88162033	0.614994	0.793354	0.367393	0.250998	0.69655	0.87559	0.593355	0.108934	-2.44544	0	1	1	0.768292	0.780558	0.0228507	0.0110321	0.98565	0.995379	0.104788	0.763588	2.86533	1.32258	0.25705	0.680036
Cav1	NM_031556	chr4:44597122-44630202	2.8259	0.0203901	-7.1147	-1.03312	0.4348	0.734541	2.73157	1.02516	-1.41389	-0.753978	0.5011	0.701155	0.0189381	0.465731	4.62014	0	1	1	0.9832	0.455617	-1.10966	-0.252093	0.63075	0.866591
Cav1	NM_133651	chr4:44597122-44630202	1.39794	3.04326	1.12232	0.453027	0.3023	0.637402	1.34458	2.25036	0.743002	0.284655	0.53275	0.724428	2.94976	3.57009	0.275363	0.2702	0.724	0.887037	2.16467	3.47862	0.684371	0.532229	0.46805	0.795226
Cav2	NM_131914	chr4:44573263-44580640	5.90462	2.4467	-1.27101	-1.74743	0.02545	0.178593	5.68613	3.37798	-0.751288	-1.05416	0.1128	0.325302	2.3703	1.3771	-0.783436	-0.681206	0.27355	0.626431	3.2442	1.34602	-1.26916	-0.967818	0.13195	0.565074
Cav3	NM_019155	chr4:144382944-144398919	0.192767	1.33992	2.79722	1.0497	0.27135	0.611491	0.186365	1.90134	3.35081	1.28175	0.22915	0.475075	1.29917	0	#NAME?	#NAME?	5e-05	0.0020606	1.82369	0	#NAME?	#NAME?	5e-05	0.00359193
Cb707485	NR_029398	chr20:3532201-3535176	0	0	0	0	1	1	0	0	0	0	1	1	0	0	0	0	1	1	0	0	0	0	1	1
CB741658	NR_002316	chr20:3630526-3633778	0	0	0	0	1	1	0	0	0	0	1	1	0	0	0	0	1	1	0	0	0	0	1	1
Cbfa2t2	NM_001168542	chr3:149935730-150038257	1.96513	3.0455	0.632055	0.677703	0.36015	0.682052	1.89987	4.42156	1.21866	1.20715	0.15275	0.386758	2.95771	1.80618	-0.711541	-0.623383	0.42395	0.731113	4.24388	1.76386	-1.26664	-1.18223	0.1213	0.551555
Cbfa2t3	NM_001108453	chr19:55441571-55510460	25.638	17.8442	-0.522833	-1.49186	0.06935	0.315787	24.7658	19.718	-0.328837	-1.01222	0.2654	0.504571	17.3289	30.5718	0.819016	2.1966	0.01075	0.123646	18.9392	29.8695	0.657299	1.96454	0.04275	0.375895
Cbfb	NM_001013191	chr19:37127507-37171071	4.34997	4.57127	0.0715886	0.121438	0.86085	0.945227	4.18361	3.40985	-0.295042	-0.497789	0.51635	0.711301	4.43491	2.75097	-0.688966	-0.930413	0.17925	0.541044	3.28496	2.68443	-0.291261	-0.374646	0.62585	0.865826
Cblb	NM_133601	chr11:51040206-51202703	1.65953	2.84281	0.776544	0.868962	0.21785	0.566313	1.60148	0.604202	-1.4063	-0.838205	0.21355	0.461635	2.76211	1.18587	-1.21982	-1.10051	0.1397	0.487235	0.581505	1.15815	0.993961	0.598266	0.35245	0.739154
Cblc	NM_001034920	chr1:80699320-80716146	0	0	0	0	1	1	0	0	0	0	1	1	0	0	0	0	1	1	0	0	0	0	1	1
Cbll1	NM_001108018	chr6:50772719-50786851	5.80833	5.42305	-0.0990194	-0.212614	0.75945	0.905058	5.60097	7.90003	0.496182	1.10849	0.1149	0.329092	5.26086	5.58795	0.0870197	0.165357	0.8126	0.926428	7.59593	5.45385	-0.477951	-0.963742	0.1628	0.609898
Cbln1	NM_001109127	chr19:20607506-20611316	4.83588	5.67186	0.230044	0.342345	0.62845	0.841827	4.66493	8.10844	0.797568	1.24101	0.0984	0.300167	5.50265	4.05337	-0.441004	-0.559265	0.43545	0.738069	7.79087	3.95984	-0.976341	-1.25122	0.11035	0.53913
Cbln2	NM_001012740	chr18:83776476-83782930	5.81184	8.79613	0.597874	0.980128	0.15695	0.484817	5.61047	11.7261	1.06352	1.74297	0.0184	0.100843	8.53163	14.4741	0.762577	1.32047	0.06035	0.336208	11.2797	14.1224	0.324253	0.597915	0.3947	0.761612
Cbln3	NM_001109330	chr15:34548539-34550850	0	0	0	0	1	1	0	0	0	0	1	1	0	0	0	0	1	1	0	0	0	0	1	1
Cbln4	NM_001109210	chr3:170033165-170040953	4.14198	5.6633	0.451324	0.700178	0.30985	0.643494	3.99269	0.972536	-2.03754	-1.77023	0.02425	0.121853	5.49762	0.292333	-4.23313	-2.50027	0.25555	0.612757	0.936745	0.285965	-1.71182	-0.854157	0.3366	0.731016
Cbr1	NM_019170	chr11:33813040-33815418	0	0	0	0	1	1	0	0	0	0	1	1	0	0	0	0	1	1	0	0	0	0	1	1
Cbr1	NM_019170_1	chr11:33845416-33847793	0	0	0	0	1	1	0	0	0	0	1	1	0	0	0	0	1	1	0	0	0	0	1	1
Cbr1	NM_019170_2	chr11:33863551-33865930	8.85369	7.73569	-0.194748	-0.201178	0.77675	0.910157	8.55233	8.01905	-0.0928873	-0.086318	0.91255	0.949651	7.50611	4.32364	-0.795818	-0.487966	0.4467	0.744539	7.70446	4.22107	-0.868084	-0.539223	0.47355	0.797414
Cbr3	NM_001107110	chr11:33909416-33917674	27.4337	57.6359	1.07102	2.2086	0.00415	0.0571138	26.4796	32.78	0.307933	0.583043	0.45735	0.669018	55.9389	28.3913	-0.978406	-1.86532	0.0118	0.131697	31.4754	27.7268	-0.182944	-0.327049	0.6665	0.880194
Cbr4	NM_182672	chr16:31956751-31972507	24.9622	21.9265	-0.187071	-0.346625	0.63195	0.842656	24.0848	36.7711	0.610452	1.22483	0.08225	0.270645	21.2546	30.7056	0.530727	0.910255	0.185	0.547628	35.3838	29.9679	-0.239669	-0.455306	0.5349	0.823175
Cbs	NM_012522	chr20:10361986-10386663	16.8815	13.6846	-0.302888	-0.636951	0.36585	0.687946	16.2949	11.0903	-0.55512	-1.08865	0.1285	0.347874	13.2736	17.1823	0.37236	0.708772	0.321	0.657619	10.6612	16.7803	0.654393	1.18275	0.1164	0.546211
Cbwd1	NM_133535	chr1:242820142-242861717	2.15409	2.33893	0.118772	0.0803642	0.8975	0.963737	2.08089	6.24148	1.58469	0.995948	0.16215	0.39967	2.27168	1.61116	-0.495655	-0.251612	0.71365	0.881612	6.00817	1.57413	-1.93237	-1.24333	0.0732	0.466978
Cbx2	NM_001107071	chr10:108055269-108393408	0.281199	0.0744071	-1.91808	0	1	1	0.271063	0.0828233	-1.71052	0	1	1	0.0719944	0.377684	2.39122	0	1	1	0.0795187	0.369444	2.21599	0	1	1
Cbx3	NM_001008313	chr4:81244497-81257898	33.3015	65.8027	0.982559	3.09732	5e-05	0.0023396	32.0969	56.072	0.804848	2.49615	0.00105	0.0118244	63.8032	38.4572	-0.730373	-2.18589	0.00265	0.0479922	53.966	37.5208	-0.524361	-1.56757	0.04065	0.370076
Cbx5	NM_001106797	chr7:144819728-144837583	122.023	195.855	0.682628	2.45169	0.00065	0.0155178	117.713	211.036	0.842208	3.01752	0.0002	0.00305684	189.968	146.91	-0.37082	-1.26001	0.0706	0.363857	203.007	143.344	-0.502046	-1.72701	0.0152	0.244171
Cbx6	NM_001012119	chr7:121050295-121058029	177.928	189.247	0.0889761	0.432463	0.5889	0.821944	171.815	215.248	0.325145	1.77367	0.03635	0.160381	183.81	231.371	0.331992	1.54359	0.0599	0.335346	206.798	225.98	0.127973	0.672407	0.4374	0.780464
Cbx7	NM_199117	chr7:121136066-121153383	11.8751	10.9509	-0.116894	-0.288481	0.70035	0.877507	11.4618	16.4061	0.517399	1.31454	0.0846	0.274956	10.6377	14.5767	0.454478	1.00963	0.20285	0.56599	15.767	14.2342	-0.147546	-0.354617	0.64565	0.872042
Cbx8	NM_001034078	chr10:108055269-108393408	8.62812	12.5138	0.536407	0.566394	0.4402	0.737956	8.3316	9.17027	0.138371	0.134727	0.84485	0.916629	12.156	4.53381	-1.42288	-1.26967	0.08615	0.402712	8.8214	4.42692	-0.994703	-0.744144	0.29035	0.70376
Cby1	NM_145676	chr7:120891939-120897687	38.6591	56.1145	0.537567	0.716523	0.31315	0.644821	37.3044	57.6548	0.628093	0.77772	0.27605	0.512626	54.4548	28.968	-0.910597	-1.00845	0.1289	0.47335	55.4075	28.2717	-0.970722	-1.00872	0.16705	0.617075
Cc2d1a	NM_001013869	chr19:25246911-25261911	36.745	23.8833	-0.621546	-1.97623	0.01075	0.108408	35.505	24.8817	-0.512934	-1.69157	0.04465	0.184048	23.1872	26.2308	0.177937	0.492328	0.54205	0.795411	23.9006	25.6376	0.101215	0.290156	0.7412	0.912574
Cc2d1b	NM_001270984	chr5:128215710-128229762	8.49329	8.16434	-0.0569861	-0.107565	0.87845	0.953971	8.20285	10.2374	0.319658	0.616983	0.4215	0.640555	7.91994	6.76028	-0.228405	-0.357442	0.59695	0.822615	9.83408	6.60164	-0.574967	-0.932181	0.197	0.648552
Ccar1	NM_001108535	chr20:32373442-32416044	11.5171	11.5136	-0.00044566	-0.00117137	0.99895	0.999121	11.1127	13.3704	0.266832	0.702695	0.31965	0.55131	11.1621	10.4094	-0.100722	-0.232545	0.7458	0.895989	12.8656	10.1605	-0.340545	-0.807549	0.25515	0.680036
Ccar2	NM_001170472	chr15:51818888-51834030	27.9842	22.1039	-0.340312	-1.06261	0.14525	0.467052	27.0131	14.6877	-0.87905	-2.46489	0.002	0.0195873	21.4564	34.4404	0.682696	1.94421	0.0089	0.109958	14.1156	33.6184	1.25196	3.24975	0.00015	0.00903594
Ccbl1	NM_001013164	chr3:8752624-8766433	10.0827	6.86376	-0.554818	-0.635616	0.3525	0.67642	9.72811	4.10646	-1.24427	-1.11866	0.08565	0.276833	6.66487	2.45891	-1.43855	-0.913813	0.2042	0.567991	3.95586	2.39755	-0.722432	-0.429368	0.51125	0.813806
Ccbl2	NM_001015037	chr2:248644472-248690289	9.98918	6.99608	-0.51382	-0.628705	0.38225	0.69861	9.62912	10.9634	0.187219	0.239052	0.7392	0.858042	6.78089	11.2413	0.729261	0.785345	0.2467	0.60994	10.5466	10.972	0.0570552	0.0663341	0.92565	0.979386
Ccdc101	NM_001114502	chr1:198067065-198100493	12.4042	10.0139	-0.308821	-0.425635	0.536	0.793386	11.9736	15.7621	0.396606	0.591095	0.3896	0.613717	9.71516	18.1122	0.898651	1.15443	0.11275	0.451252	15.1483	17.6816	0.223091	0.322678	0.66365	0.879543
Ccdc102a	NM_001108437	chr19:10519492-10535162	1.72624	5.76774	1.74037	1.54394	0.0355	0.216404	1.66701	0.920372	-0.856979	-0.432866	0.5436	0.731141	5.60439	1.21368	-2.20717	-1.76728	0.0313	0.233708	0.885905	1.18676	0.421803	0.223574	0.4601	0.792463
Ccdc103	NM_001109049	chr10:90984226-90987627	0.592699	1.44387	1.28457	0.552826	0.48455	0.763047	0.571052	5.61892	3.2986	1.57046	0.2435	0.487608	1.39703	6.06436	2.11799	1.1254	0.30565	0.647168	5.41114	5.92044	0.129772	0.0885703	0.88335	0.964215
Ccdc104	NM_001024866	chr14:113618955-113644779	245.848	275.849	0.166111	0.669892	0.3378	0.663018	237.167	306.188	0.368515	1.5722	0.0268	0.130526	267.549	247.648	-0.111508	-0.426411	0.5567	0.802047	294.525	241.559	-0.286012	-1.16103	0.1059	0.529546
Ccdc105	NM_001025774	chr7:13913928-13919420	0	0	0	0	1	1	0	0	0	0	1	1	0	0	0	0	1	1	0	0	0	0	1	1
Ccdc112	NM_001109124	chr18:40220854-40254845	20.9542	21.6693	0.0484174	0.119556	0.8699	0.950435	20.1873	25.2553	0.323136	0.805398	0.27045	0.507747	21.014	30.1206	0.519397	1.22142	0.09405	0.418347	24.2944	29.3822	0.274317	0.674083	0.35745	0.74292
Ccdc114	NM_001126277	chr1:101906904-101932999	0.106713	0	#NAME?	0	1	1	0.103183	0.0720383	-0.518368	0	1	1	0	0.00991612	inf	0	1	1	0.0691374	0.00965599	-2.83997	0	1	1
Ccdc115	NM_001108793	chr9:37769958-37778839	4.13135	6.48606	0.650728	0.451844	0.53285	0.791523	3.98849	1.19032	-1.7445	-0.480491	0.39175	0.615697	6.2944	2.61603	-1.26669	-0.757308	0.38995	0.712384	1.14782	2.55592	1.15495	0.340311	0.6498	0.873905
Ccdc116	NM_001024740	chr11:88095169-88098252	0.0175429	0.160432	3.19301	0	1	1	0.0169754	0.119782	2.8189	0	1	1	0.155227	0	#NAME?	0	1	1	0.115507	0	#NAME?	0	1	1
Ccdc117	NM_001017502	chr14:85763395-85772762	2.66576	2.72461	0.0315013	0.0316115	0.96515	0.986259	2.57248	1.9575	-0.394152	-0.343254	0.6298	0.790741	2.64284	1.02174	-1.37106	-0.909301	0.1973	0.563307	1.88659	0.995329	-0.922538	-0.586748	0.39535	0.76167
Ccdc12	NM_001108783	chr8:118926466-118977038	181.876	253.246	0.477585	1.49227	0.03335	0.208158	175.598	276.599	0.655516	2.0211	0.00495	0.0389717	245.616	221.047	-0.152051	-0.44496	0.51715	0.781285	265.869	215.714	-0.3016	-0.887905	0.2064	0.655809
Ccdc120	NM_001191729	chrX:15610229-15616727	5.39444	3.98332	-0.437502	-0.641146	0.49035	0.766655	5.20963	1.7141	-1.60373	-1.99258	0.0487	0.195517	3.87137	2.08278	-0.894334	-0.762734	0.3114	0.649995	1.64659	2.03201	0.303426	0.233667	0.7867	0.930185
Ccdc124	NM_001106071	chr16:20317445-20323265	194.046	261.217	0.428845	1.78656	0.01685	0.140393	187.353	314.019	0.745091	3.31014	0.0001	0.00170145	253.624	235.947	-0.104228	-0.421184	0.58045	0.8146	301.714	230.454	-0.388705	-1.70329	0.03055	0.334834
Ccdc125	NM_001134761	chr2:30685844-30704491	1.34676	0.163665	-3.04067	-1.5151	0.22995	0.578996	1.29972	1.4853	0.192553	0.109575	0.8724	0.930737	0.158796	3.17829	4.32301	2.24109	0.2448	0.609142	1.42881	3.09736	1.11622	0.717944	0.2965	0.707633
Ccdc126	NM_001109232	chr4:78982021-79003052	5.04915	10.0245	0.98942	1.7129	0.015	0.13134	4.86333	4.93422	0.020877	0.0320937	0.9671	0.980228	9.72067	6.45314	-0.591054	-0.988799	0.17405	0.535464	4.75306	6.29392	0.405102	0.59645	0.4509	0.786136
Ccdc127	NM_198766	chr1:31539213-31545557	35.5035	36.1963	0.0278835	0.0660708	0.92565	0.97443	34.243	35.6792	0.0592765	0.135402	0.84915	0.918713	35.1216	27.8051	-0.337007	-0.677661	0.33555	0.670568	34.3035	27.1188	-0.339062	-0.664908	0.3391	0.732542
Ccdc129	NM_001191973	chr4:86125315-86233642	0	0.391103	inf	0	1	1	0	0	0	0	1	1	0.378379	0	#NAME?	0	1	1	0	0	0	0	1	1
Ccdc130	NM_001037644	chr19:25367552-25375368	11.1913	11.6461	0.0574626	0.083016	0.91205	0.968163	10.8054	8.09463	-0.416713	-0.518692	0.4501	0.66337	11.3121	6.70061	-0.755508	-0.836598	0.2262	0.592448	7.78414	6.53856	-0.251566	-0.234519	0.74035	0.912311
Ccdc132	NM_001173511	chr4:28441300-28551784	1.94766	2.37827	0.288171	0.307149	0.65095	0.85281	1.87894	1.34533	-0.481962	-0.459028	0.5048	0.704413	2.30557	1.29016	-0.837578	-0.730732	0.30405	0.645706	1.29494	1.25823	-0.0414837	-0.032728	0.9646	0.989671
Ccdc134	NM_001024355	chr7:123364311-123376236	3.24861	1.58401	-1.03624	-0.650278	0.3447	0.66947	3.13353	2.52036	-0.314163	-0.231596	0.74585	0.861514	1.53727	4.48285	1.54404	1.04742	0.1486	0.500758	2.42114	4.37648	0.854082	0.527958	0.4866	0.804563
Ccdc137	NM_001143896	chr10:109630098-109636480	9.82738	13.6147	0.470284	1.06838	0.13845	0.456222	9.48604	10.1329	0.0951692	0.195835	0.7878	0.886313	13.2125	11.8741	-0.154089	-0.322463	0.6604	0.856376	9.74019	11.5981	0.251862	0.483645	0.49395	0.807495
Ccdc146	NM_001025044	chr4:10213678-10421724	0.38538	0.419371	0.121944	0	1	1	0.372974	0.490491	0.395153	0	1	1	0.406622	0.436281	0.101569	0	1	1	0.470807	0.426675	-0.141995	0	1	1
Ccdc148	NM_001107732	chr3:44892218-45210474	2.35504	2.87424	0.287427	0.245614	0.72375	0.889704	2.27494	3.45451	0.602653	0.487341	0.4698	0.678844	2.78224	7.69564	1.46779	1.33571	0.0861	0.402712	3.32241	7.51194	1.17695	1.18464	0.08695	0.496664
Ccdc150	NM_001191806	chr9:60900212-60987151	0	0	0	0	1	1	0	0	0	0	1	1	0	0	0	0	1	1	0	0	0	0	1	1
Ccdc151	NM_001309457	chr8:23000911-23014514	0.545064	0	#NAME?	0	1	1	0.525177	0.52144	-0.010301	0	1	1	0	0.0176791	inf	0	1	1	0.500002	0.0172931	-4.85367	0	1	1
Ccdc152	NM_001191959	chr2:53105911-53138273	1.19949	0	#NAME?	#NAME?	0.2509	0.596914	1.16293	0	#NAME?	#NAME?	0.24965	0.49295	0	1.23593	inf	#NAME?	0.24575	0.609696	0	1.20916	inf	#NAME?	0.24305	0.678537
Ccdc153	NM_001013953	chr8:48571322-48577856	6.64331	10.5875	0.672387	0.839296	0.22495	0.573804	6.41975	1.02647	-2.64482	-1.6687	0.01945	0.104497	10.2805	1.10509	-3.21767	-2.14067	0.00625	0.0882491	0.988574	1.07883	0.126051	0.0593176	0.55935	0.835812
Ccdc163	NM_001025656	chr5:135562033-135568062	2.36945	1.35173	-0.80974	-0.508192	0.48215	0.762394	2.28551	3.22277	0.495787	0.354508	0.6143	0.779714	1.31295	0.320285	-2.03538	-0.888554	0.3426	0.675724	3.09613	0.313239	-3.30513	-1.52713	0.2452	0.678627
Ccdc166	NM_001130509	chr7:117039889-117041693	2.56591	1.31011	-0.969784	-0.534757	0.3494	0.673787	2.47797	0.219411	-3.49745	-1.7246	0.25485	0.496445	1.26933	0.0812046	-3.96636	-1.37851	0.27345	0.626325	0.210478	0.0794391	-1.40575	0	1	1
[truncated: 16,971 more rows]
